# Supplementary material for: HSV-1 ICP22 Is a Selective Viral Repressor of Cellular RNA Polymerase II-Mediated Transcription Elongation
Source: MDPI journal article supplement (doi:10.3390/vaccines9101054), 2021-09-22
Supplement: s1 [file s1]

**Supplementary Figure S1**

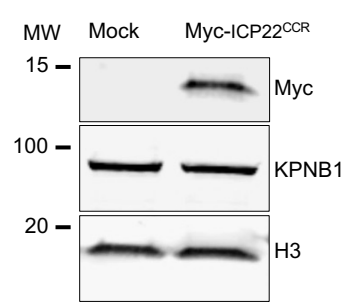

Western blot analysis of KPNB1 (Primary antibody A300-482A; Bethyl lab) in HEK293 cell extract after transfection of a vector expressing Myc-tag ICP22<sup>CCR</sup>. H3 is used as loading control.
