# Supplementary material for: HSV-1 ICP22 Is a Selective Viral Repressor of Cellular RNA Polymerase II-Mediated Transcription Elongation
Source: MDPI journal article supplement (doi:10.3390/vaccines9101054), 2021-09-22
Supplement: s1 [file s1]

Supplementary Figure S3

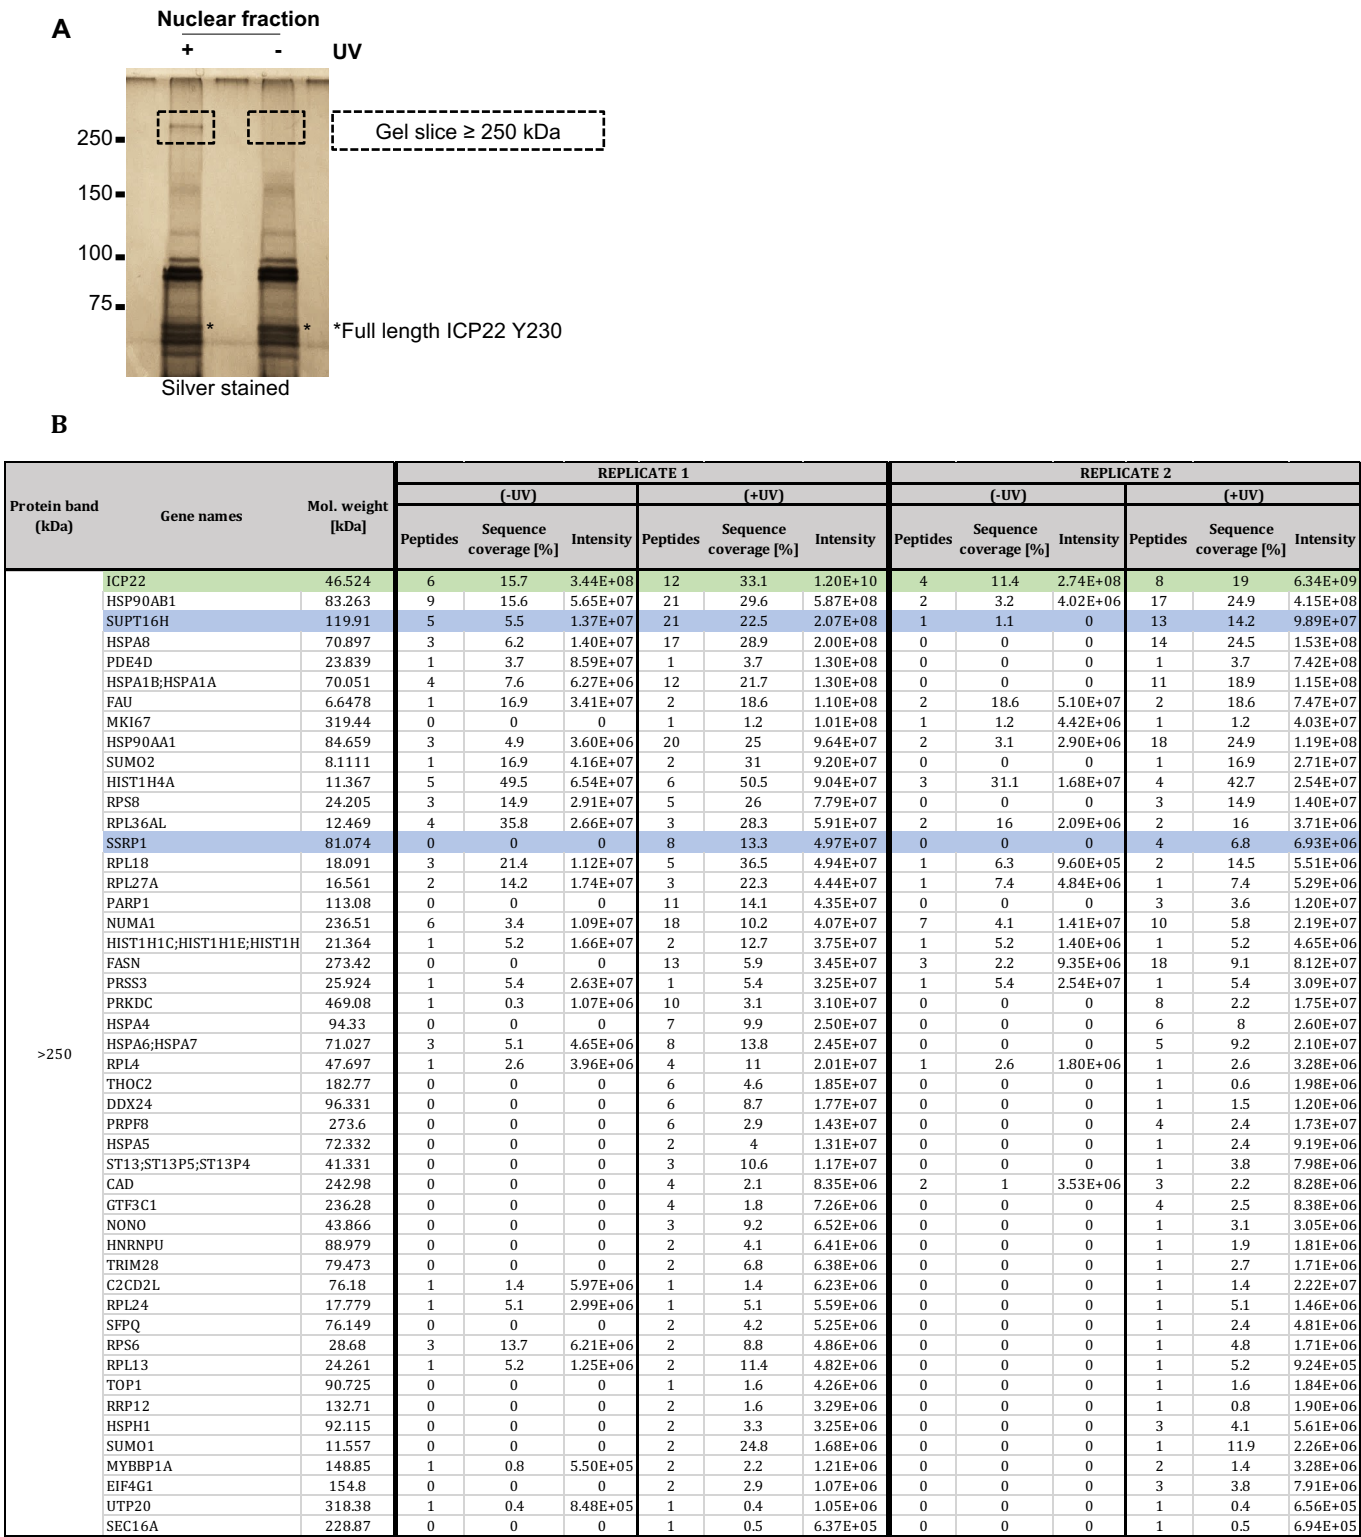

(A) Indicated protein bands (>250kDa) of silver-stained SDS-PAGE gel were excised, in-gel digested and analysed by mass spectrometry. (B) Mass spectrometric analysis of ICP22 (green shade), SPT16 (gene name; SUPT16H) and SSRP1 (blue shades) identified from the silver-stained gel slice of ≥250 kDa of no UV and UV-treated samples. Details of the proteomic data including the untransfected samples can be found in Supplementary Table 4.
