# Supplementary material for: HSV-1 ICP22 Is a Selective Viral Repressor of Cellular RNA Polymerase II-Mediated Transcription Elongation
Source: MDPI journal article supplement (doi:10.3390/vaccines9101054), 2021-09-22
Supplement: s1 [file s1]

### Supplementary Figure S4

**A**

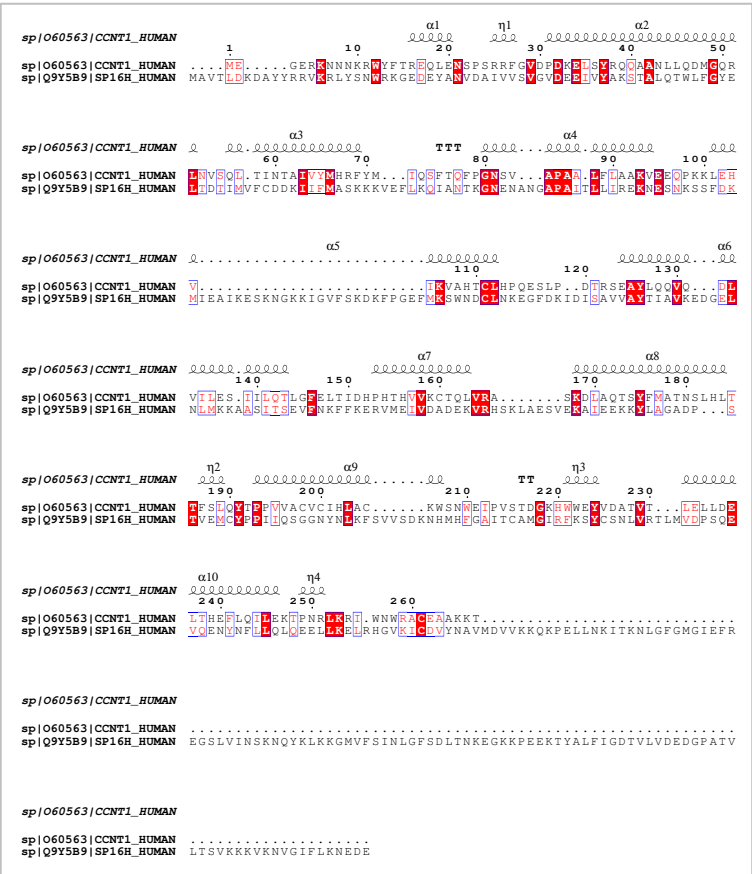**B**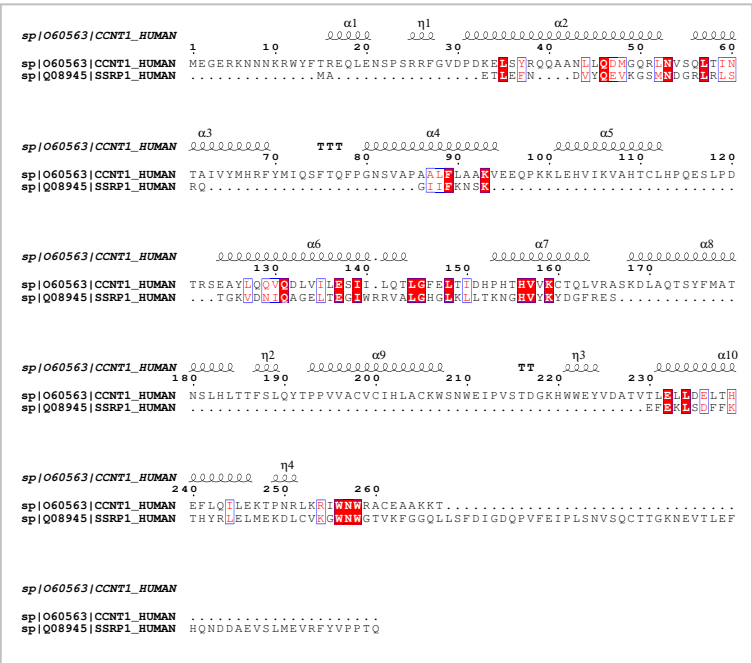

Sequence alignment of Cyclin T1 residues 1-266 (Uniprot ID O60563) and N-terminal region of (A) SPT16 (Uniprot ID Q9Y5B9) or (B) SSRP1 (Uniprot ID Q08945) showing minimal sequence similarity between the two known ICP22-binding complexes.
