# Supplementary material for: HSV-1 ICP22 Is a Selective Viral Repressor of Cellular RNA Polymerase II-Mediated Transcription Elongation
Source: MDPI journal article supplement (doi:10.3390/vaccines9101054), 2021-09-22
Supplement: s1 [file s1]

Supplementary Figure S2

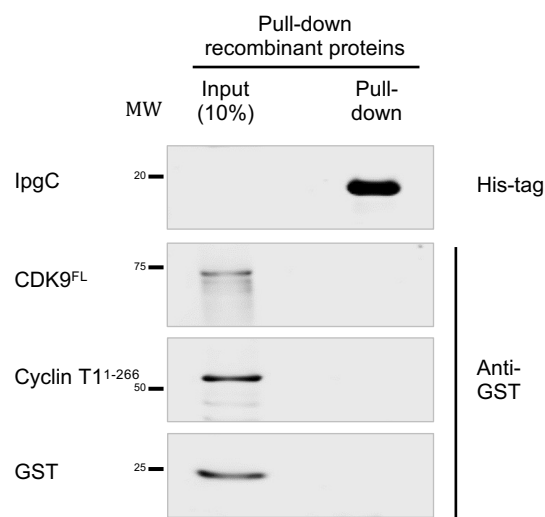

His-IpgC were bacterially expressed and immobilized on nickel magnetic beads. GST-Cyclin T1<sup>1-266</sup> and GST-CDK9<sup>FL</sup> were expressed separately in *E.coli*. Immobilized GST-Cyclin T1<sup>1-266</sup> and GST-CDK9<sup>FL</sup> were eluted with reduced glutathione, and incubated with on-bead His-IpgC. Both input and proteins retained on the beads after washes were subjected to western blot with GST and His-tag antibodies. Input represents 10% of that used for pull-down.
