# Supplementary material for: HSV-1 ICP22 Is a Selective Viral Repressor of Cellular RNA Polymerase II-Mediated Transcription Elongation
Source: Vaccines (Basel). 2021 Sep 22;9(10):1054. doi: 10.3390/vaccines9101054 (PMC8539892; doi:10.3390/vaccines9101054)
Supplement: Supplementary file 1 [file vaccines-09-01054-s001.zip]

Archive with 9 entries (9 files):
- Supplementary Figure S1.pdf
- Supplementary Figure S2.pdf
- Supplementary Figure S3.pdf
- Supplementary Figure S4.pdf
- Supplementary Table S1_List of proteins interacting with ICP22CCR identified by mass spectrometry (Replicate 1). The IpgC which does not bind to P-TEFb was used as comparison.xlsx
- Supplementary Table S2_QList of proteins interacting with ICP22CCR categorised by gene ontology (GO).xlsx
- Supplementary Table S3_Peptides of modified ICP22 detected by mass spectrometry.xlsx
- Supplementary Table S4_List of crosslinked proteins from excised gel-piece (_250kDa) identified by mass spectrometry.xlsx
- Supplementary Table S5_Sequences of primers used for ChIP-qPCR.xlsx
