# Supplementary material for: HSV-1 ICP22 Is a Selective Viral Repressor of Cellular RNA Polymerase II-Mediated Transcription Elongation
Source: Vaccines (Basel). 2021 Sep 22;9(10):1054. doi: 10.3390/vaccines9101054 (PMC8539892; doi:10.3390/vaccines9101054)
Supplement: Supplementary file 1 [file vaccines-09-01054-s001.zip › Supplementary Table S1_List of proteins interacting with ICP22CCR identified by mass spectrometry (Replicate 1). The IpgC which does not bind to P-TEFb was used as comparison.xlsx]

## Sheet: ICP22pulldown_REPLICATE1
Supplementary Table S1: List of proteins interacting with ICP22CCR identified by mass spectrometry (Replicate 1). The IpgC which does not bind to P-TEFb was used as comparison.
	Acc	Prot Name	Mr	Score (Av +- SD)	Spec counts (av+-SD)	Times detected	QE1_Firdaus_EXP1_Sample1_ICP22.	QE1_Firdaus_EXP1_Sample1_ICP22_R.	QE1_Firdaus_EXP1_Sample1_Ipgc.	QE1_Firdaus_EXP1_Sample1_Ipgc_R.		Acc	QE1_Firdaus_EXP1_Sample1_ICP22.	QE1_Firdaus_EXP1_Sample1_ICP22_R.	QE1_Firdaus_EXP1_Sample1_Ipgc.	QE1_Firdaus_EXP1_Sample1_Ipgc_R.		ICP22 bound protein	IpGC bound	ICP22 fold enrichment
	CCNH_HUMAN	Cyclin-H OS=Homo sapiens OX=9606 GN=CCNH PE=1 SV=1	38075.4	77.02+-16.35	2.0+-0.0	2	392164	804170	0	0	77.	CCNH_HUMAN	3.95552e-05	8.80498e-05	0	0		2	0	Unique
	PAF1_HUMAN	RNA polymerase II-associated factor 1 homolog OS=Homo sapiens OX=9606 GN=PAF1 PE=1 SV=2	60110.2	240.22+-12.02	5.5+-0.5	2	1.37348e+06	2.35233e+06	0	0	240	PAF1_HUMAN	0.000138534	0.00025756	0	0		2	0	Unique
	CDK9_HUMAN	Cyclin-dependent kinase 9 OS=Homo sapiens OX=9606 GN=CDK9 PE=1 SV=3	43149.3	279.46+-109.37	4.0+-1.63	3	3.00904e+06	2.83287e+06	4866.4	0	279	CDK9_HUMAN	0.000303504	0.000310175	5.85951e-06	0		1.98108	0.0189157	104.732
	NELFE_HUMAN	Negative elongation factor E OS=Homo sapiens OX=9606 GN=NELFE PE=1 SV=3	43327.8	133.6+-0.0	3.0+-0.0	1	232382	1.29407e+06	15395.3	0	133	NELFE_HUMAN	2.3439e-05	0.00014169	1.85371e-05	0		1.79814	0.201856	8.90803
	SP16H_HUMAN	FACT complex subunit SPT16 OS=Homo sapiens OX=9606 GN=SUPT16H PE=1 SV=1	120409	292.75+-260.76	6.2+-5.23	4	6.68436e+06	4.66864e+06	84242	79346.6	292	SP16H_HUMAN	0.000674211	0.000511176	0.000101434	9.54345e-05		1.71515	0.284851	6.02122
	MED1_HUMAN	Mediator of RNA polymerase II transcription subunit 1 OS=Homo sapiens OX=9606 GN=MED1 PE=1 SV=4	169342	732.62+-264.69	15.6+-7.06	4	1.20752e+07	1.26308e+07	469606	367694	732	MED1_HUMAN	0.00121795	0.00138297	0.000565441	0.000442246		1.44151	0.558491	2.58108
	CCNT1_HUMAN	Cyclin-T1 OS=Homo sapiens OX=9606 GN=CCNT1 PE=1 SV=1	81033.6	123.95+-68.07	3.2+-1.94	4	701128	3.15102e+06	67403.3	84308.6	123	CCNT1_HUMAN	7.07185e-05	0.00034501	8.11587e-05	0.000101403		1.38972	0.610277	2.2772
	CCNL2_HUMAN	Cyclin-L2 OS=Homo sapiens OX=9606 GN=CCNL2 PE=1 SV=1	58624.7	126.22+-16.18	2.0+-0.0	3	3.03421e+06	624985	50068.6	93796.2	126	CCNL2_HUMAN	0.000306042	6.84306e-05	6.02863e-05	0.000112814		1.36775	0.632245	2.16333
	CDC73_HUMAN	Parafibromin OS=Homo sapiens OX=9606 GN=CDC73 PE=1 SV=1	60653.1	523.94+-112.37	12.2+-2.32	4	9.4172e+06	6299511	285541	390618	523	CDC73_HUMAN	0.000949856	0.000689743	0.000343813	0.000469817		1.33669	0.663314	2.01516
	CDK12_HUMAN	Cyclin-dependent kinase 12 OS=Homo sapiens OX=9606 GN=CDK12 PE=1 SV=2	164738	981.19+-243.99	32.6+-9.26	4	2.87793e+07	2.64878e+07	645433	1.95637e+06	981	CDK12_HUMAN	0.00290279	0.00290019	0.000777149	0.00235304		1.2992	0.700801	1.85388
	CD11B_HUMAN	Cyclin-dependent kinase 11B OS=Homo sapiens OX=9606 GN=CDK11B PE=1 SV=4	92734.3	605.93+-89.04	16.4+-1.74	4	2.08466e+07	1.76456e+07	870946	1.10237e+06	605	CD11B_HUMAN	0.00210267	0.00193205	0.00104868	0.00132588		1.25902	0.740977	1.69914
	SPT5H_HUMAN	Transcription elongation factor SPT5 OS=Homo sapiens OX=9606 GN=SUPT5H PE=1 SV=1	121324	383.43+-43.82	7.2+-1.6	4	2.45637e+06	3406399	158256	188672	383	SPT5H_HUMAN	0.000247759	0.000372972	0.000190552	0.000226926		1.19577	0.804227	1.48686
	CDK13_HUMAN	Cyclin-dependent kinase 13 OS=Homo sapiens OX=9606 GN=CDK13 PE=1 SV=2	165564	453.03+-219.48	11.0+-4.82	4	5.16145e+06	2.60727e+06	331277	722937	453	CDK13_HUMAN	0.000520604	0.000285474	0.000398883	0.000869516		0.777139	1.22286	0.635508
	CCNT2_HUMAN	Cyclin-T2 OS=Homo sapiens OX=9606 GN=CCNT2 PE=1 SV=2	81491.7	221.46+-0.0	4.0+-0.0	1	151926	170609	47940.9	2730.67	221	CCNT2_HUMAN	1.53238e-05	1.86802e-05	5.77244e-05	3.28433e-06		0.715779	1.28422	0.557364
	CCNL1_HUMAN	Cyclin-L1 OS=Homo sapiens OX=9606 GN=CCNL1 PE=1 SV=1	59996.3	269.46+-85.97	5.8+-2.04	4	2.04528e+06	1.20316e+06	355284	303308	269	CCNL1_HUMAN	0.000206295	0.000131736	0.000427788	0.000364806		0.597954	1.40205	0.426486
	MEPCE_HUMAN	7SK snRNA methylphosphate capping enzyme OS=Homo sapiens OX=9606 GN=MEPCE PE=1 SV=1	74936.9	332.2+-115.95	7.6+-2.94	4	2.47251e+06	1.28636e+06	416110	576503	332	MEPCE_HUMAN	0.000249387	0.000140845	0.000501028	0.000693392		0.492515	1.50749	0.326713
	CCNK_HUMAN	Cyclin-K OS=Homo sapiens OX=9606 GN=CCNK PE=1 SV=2	64597.8	134.52+-63.11	3.4+-1.02	4	1.47466e+06	375348	479832	318241	134	CCNK_HUMAN	0.00014874	4.10974e-05	0.000577754	0.000382766		0.330049	1.66995	0.19764
	4F2_HUMAN	4F2 cell-surface antigen heavy chain OS=Homo sapiens OX=9606 GN=SLC3A2 PE=1 SV=3	68179.8	88.36+-20.71	2.5+-0.5	2	660355	699315	0	0	88.	4F2_HUMAN	6.6606e-05	7.65691e-05	0	0		2	0	Unique
	AAPK2_HUMAN	5'-AMP-activated protein kinase catalytic subunit alpha-2 OS=Homo sapiens OX=9606 GN=PRKAA2 PE=1 SV=2	62849.8	211.0+-9.76	4.0+-1.0	2	4071638	3060450	0	0	211	AAPK2_HUMAN	0.000410681	0.000335093	0	0		2	0	Unique
	ABI2_HUMAN	Abl interactor 2 OS=Homo sapiens OX=9606 GN=ABI2 PE=1 SV=1	55685.8	168.5+-0.5	5.5+-0.5	2	3.31695e+06	2.29783e+06	0	0	168	ABI2_HUMAN	0.000334561	0.000251593	0	0		2	0	Unique
	APTX_HUMAN	Aprataxin OS=Homo sapiens OX=9606 GN=APTX PE=1 SV=2	41113.3	94.9+-24.7	2.5+-0.5	2	1.42917e+06	334387	0	0	94.	APTX_HUMAN	0.000144151	3.66126e-05	0	0		2	0	Unique
	ARHG6_HUMAN	Rho guanine nucleotide exchange factor 6 OS=Homo sapiens OX=9606 GN=ARHGEF6 PE=1 SV=2	88697.7	147.37+-0.0	3.0+-0.0	1	0	680141	0	0	147	ARHG6_HUMAN	0	7.44697e-05	0	0		2	0	Unique
	ARHG7_HUMAN	Rho guanine nucleotide exchange factor 7 OS=Homo sapiens OX=9606 GN=ARHGEF7 PE=1 SV=2	90867.7	149.67+-0.0	3.0+-0.0	1	612248	0	0	0	149	ARHG7_HUMAN	6.17538e-05	0	0	0		2	0	Unique
	ARHGC_HUMAN	Rho guanine nucleotide exchange factor 12 OS=Homo sapiens OX=9606 GN=ARHGEF12 PE=1 SV=1	174094	155.97+-104.15	3.5+-1.5	2	1.49859e+06	314551	0	0	155	ARHGC_HUMAN	0.000151154	3.44407e-05	0	0		2	0	Unique
	ARHGG_HUMAN	Rho guanine nucleotide exchange factor 16 OS=Homo sapiens OX=9606 GN=ARHGEF16 PE=1 SV=1	80340.3	101.82+-0.0	2.0+-0.0	1	540358	274154	0	0	101	ARHGG_HUMAN	5.45026e-05	3.00176e-05	0	0		2	0	Unique
	ASAP1_HUMAN	Arf-GAP with SH3 domain, ANK repeat and PH domain-containing protein 1 OS=Homo sapiens OX=9606 GN=ASAP1 PE=1 SV=4	126390	82.21+-13.44	2.0+-0.0	2	1.23868e+06	354806	0	0	82.	ASAP1_HUMAN	0.000124938	3.88483e-05	0	0		2	0	Unique
	ASPP2_HUMAN	Apoptosis-stimulating of p53 protein 2 OS=Homo sapiens OX=9606 GN=TP53BP2 PE=1 SV=2	126222	510.74+-67.5	9.5+-1.5	2	5041793	3.74667e+06	0	0	510	ASPP2_HUMAN	0.000508535	0.000410229	0	0		2	0	Unique
	ATF1_HUMAN	Cyclic AMP-dependent transcription factor ATF-1 OS=Homo sapiens OX=9606 GN=ATF1 PE=1 SV=2	29328.8	127.53+-0.06	3.0+-0.0	2	354774	1.50705e+06	0	0	127	ATF1_HUMAN	3.57839e-05	0.000165009	0	0		2	0	Unique
	ATG2B_HUMAN	Autophagy-related protein 2 homolog B OS=Homo sapiens OX=9606 GN=ATG2B PE=1 SV=5	234497	164.31+-0.0	3.0+-0.0	1	618357	155445	0	0	164	ATG2B_HUMAN	6.23699e-05	1.70199e-05	0	0		2	0	Unique
	ATN1_HUMAN	Atrophin-1 OS=Homo sapiens OX=9606 GN=ATN1 PE=1 SV=3	125509	113.4+-34.61	2.5+-0.5	2	1.92628e+06	642796	0	0	113	ATN1_HUMAN	0.000194292	7.03807e-05	0	0		2	0	Unique
	ATRX_HUMAN	Transcriptional regulator ATRX OS=Homo sapiens OX=9606 GN=ATRX PE=1 SV=5	284863	99.39+-0.0	2.0+-0.0	1	0	258799	0	0	99.	ATRX_HUMAN	0	2.83363e-05	0	0		2	0	Unique
	ATX1L_HUMAN	Ataxin-1-like OS=Homo sapiens OX=9606 GN=ATXN1L PE=1 SV=1	73774	120.62+-59.27	2.5+-0.5	2	646628	1.64658e+06	0	0	120	ATX1L_HUMAN	6.52215e-05	0.000180286	0	0		2	0	Unique
	BABA1_HUMAN	BRISC and BRCA1-A complex member 1 OS=Homo sapiens OX=9606 GN=BABAM1 PE=1 SV=1	37049.8	273.44+-50.42	3.0+-1.0	2	57914.9	256091	0	0	273	BABA1_HUMAN	5.84153e-06	2.80398e-05	0	0		2	0	Unique
	BCL10_HUMAN	B-cell lymphoma/leukemia 10 OS=Homo sapiens OX=9606 GN=BCL10 PE=1 SV=1	26520.4	72.69+-0.0	2.0+-0.0	1	3463403	2473852	0	0	72.	BCL10_HUMAN	0.000349332	0.000270866	0	0		2	0	Unique
	BCL9L_HUMAN	B-cell CLL/lymphoma 9-like protein OS=Homo sapiens OX=9606 GN=BCL9L PE=1 SV=1	157427	479.53+-21.8	10.0+-1.0	2	3.54984e+06	6.0357e+06	0	0	479	BCL9L_HUMAN	0.000358051	0.000660858	0	0		2	0	Unique
	BICD1_HUMAN	Protein bicaudal D homolog 1 OS=Homo sapiens OX=9606 GN=BICD1 PE=1 SV=3	111252	237.12+-106.45	4.0+-1.0	2	1.61396e+06	1.34232e+06	0	0	237	BICD1_HUMAN	0.000162791	0.000146973	0	0		2	0	Unique
	BOP1_HUMAN	Ribosome biogenesis protein BOP1 OS=Homo sapiens OX=9606 GN=BOP1 PE=1 SV=2	84261.5	152.56+-25.93	2.5+-0.5	2	429734	768588	0	0	152	BOP1_HUMAN	4.33447e-05	8.41539e-05	0	0		2	0	Unique
	BORG5_HUMAN	Cdc42 effector protein 1 OS=Homo sapiens OX=9606 GN=CDC42EP1 PE=1 SV=1	40384.1	111.21+-28.27	2.5+-0.5	2	851014	1.05054e+06	0	0	111	BORG5_HUMAN	8.58366e-05	0.000115026	0	0		2	0	Unique
	BRD7_HUMAN	Bromodomain-containing protein 7 OS=Homo sapiens OX=9606 GN=BRD7 PE=1 SV=1	74548.4	87.02+-31.63	2.5+-0.5	2	356632	646682	0	0	87.	BRD7_HUMAN	3.59713e-05	7.08062e-05	0	0		2	0	Unique
	BRD8_HUMAN	Bromodomain-containing protein 8 OS=Homo sapiens OX=9606 GN=BRD8 PE=1 SV=2	136049	77.03+-1.76	2.0+-0.0	2	1.31725e+06	1.11525e+06	0	0	77.	BRD8_HUMAN	0.000132863	0.000122111	0	0		2	0	Unique
	BRK1_HUMAN	Protein BRICK1 OS=Homo sapiens OX=9606 GN=BRK1 PE=1 SV=1	8796.49	96.29+-15.17	2.0+-0.0	2	1306683	824884	0	0	96.	BRK1_HUMAN	0.000131797	9.03178e-05	0	0		2	0	Unique
	BUB1_HUMAN	Mitotic checkpoint serine/threonine-protein kinase BUB1 OS=Homo sapiens OX=9606 GN=BUB1 PE=1 SV=1	123437	81.98+-0.0	2.0+-0.0	1	154030	553818	0	0	81.	BUB1_HUMAN	1.55361e-05	6.06383e-05	0	0		2	0	Unique
	C2CD5_HUMAN	C2 domain-containing protein 5 OS=Homo sapiens OX=9606 GN=C2CD5 PE=1 SV=1	111916	111.03+-43.58	2.5+-0.5	2	502425	765633	0	0	111	C2CD5_HUMAN	5.06766e-05	8.38304e-05	0	0		2	0	Unique
	CATA_HUMAN	Catalase OS=Homo sapiens OX=9606 GN=CAT PE=1 SV=3	59946.8	219.62+-33.61	2.5+-0.5	2	2.32328e+06	836255	0	0	219	CATA_HUMAN	0.000234335	9.15629e-05	0	0		2	0	Unique
	CBP_HUMAN	CREB-binding protein OS=Homo sapiens OX=9606 GN=CREBBP PE=1 SV=3	268033	686.22+-43.48	16.5+-0.5	2	1.04122e+07	8.6222e+06	0	0	686	CBP_HUMAN	0.00105022	0.000944058	0	0		2	0	Unique
	CCNB2_HUMAN	G2/mitotic-specific cyclin-B2 OS=Homo sapiens OX=9606 GN=CCNB2 PE=1 SV=1	45537.9	91.64+-0.0	2.0+-0.0	1	643432	959506	0	0	91.	CCNB2_HUMAN	6.48991e-05	0.000105058	0	0		2	0	Unique
	CEP85_HUMAN	Centrosomal protein of 85 kDa OS=Homo sapiens OX=9606 GN=CEP85 PE=1 SV=1	86270.4	210.1+-93.66	4.0+-2.0	2	2.15586e+06	399757	0	0	210	CEP85_HUMAN	0.000217449	4.377e-05	0	0		2	0	Unique
	CETN2_HUMAN	Centrin-2 OS=Homo sapiens OX=9606 GN=CETN2 PE=1 SV=1	19725.9	132.48+-0.0	2.0+-0.0	1	0	735020	0	0	132	CETN2_HUMAN	0	8.04785e-05	0	0		2	0	Unique
	CHD6_HUMAN	Chromodomain-helicase-DNA-binding protein 6 OS=Homo sapiens OX=9606 GN=CHD6 PE=1 SV=4	308071	156.84+-0.0	8.0+-0.0	1	6.18978e+06	0	0	0	156	CHD6_HUMAN	0.000624325	0	0	0		2	0	Unique
	CHD9_HUMAN	Chromodomain-helicase-DNA-binding protein 9 OS=Homo sapiens OX=9606 GN=CHD9 PE=1 SV=2	327986	285.26+-29.76	9.0+-1.0	2	5.36831e+06	1.02603e+07	0	0	285	CHD9_HUMAN	0.000541468	0.00112342	0	0		2	0	Unique
	CHRC1_HUMAN	Chromatin accessibility complex protein 1 OS=Homo sapiens OX=9606 GN=CHRAC1 PE=1 SV=1	14758.5	192.96+-0.0	2.0+-0.0	1	257250	960408	0	0	192	CHRC1_HUMAN	2.59473e-05	0.000105157	0	0		2	0	Unique
	CTCF_HUMAN	Transcriptional repressor CTCF OS=Homo sapiens OX=9606 GN=CTCF PE=1 SV=1	84272	194.64+-12.11	3.5+-0.5	2	1.56608e+06	1.52572e+06	0	0	194	CTCF_HUMAN	0.000157961	0.000167053	0	0		2	0	Unique
	CUL3_HUMAN	Cullin-3 OS=Homo sapiens OX=9606 GN=CUL3 PE=1 SV=2	89443.7	118.59+-0.0	2.0+-0.0	1	123430	256265	0	0	118	CUL3_HUMAN	1.24496e-05	2.80588e-05	0	0		2	0	Unique
	CUX1_HUMAN	Homeobox protein cut-like 1 OS=Homo sapiens OX=9606 GN=CUX1 PE=1 SV=3	164544	495.13+-47.89	10.5+-1.5	2	3.91026e+06	2.38256e+06	0	0	495	CUX1_HUMAN	0.000394405	0.00026087	0	0		2	0	Unique
	DDX20_HUMAN	Probable ATP-dependent RNA helicase DDX20 OS=Homo sapiens OX=9606 GN=DDX20 PE=1 SV=2	92980.8	105.31+-0.0	2.0+-0.0	1	516451	1120790	0	0	105	DDX20_HUMAN	5.20913e-05	0.000122717	0	0		2	0	Unique
	DEN4C_HUMAN	DENN domain-containing protein 4C OS=Homo sapiens OX=9606 GN=DENND4C PE=1 SV=3	214914	194.27+-25.96	3.5+-0.5	2	1.42173e+06	1.28895e+06	0	0	194	DEN4C_HUMAN	0.000143402	0.000141129	0	0		2	0	Unique
	DEPD5_HUMAN	GATOR complex protein DEPDC5 OS=Homo sapiens OX=9606 GN=DEPDC5 PE=1 SV=2	182802	102.69+-17.68	2.5+-0.5	2	634419	790665	0	0	102	DEPD5_HUMAN	6.399e-05	8.65711e-05	0	0		2	0	Unique
	DMXL2_HUMAN	DmX-like protein 2 OS=Homo sapiens OX=9606 GN=DMXL2 PE=1 SV=2	342962	70.97+-2.16	2.0+-0.0	2	430580	579400	0	0	70.	DMXL2_HUMAN	4.343e-05	6.34394e-05	0	0		2	0	Unique
	DPOE3_HUMAN	DNA polymerase epsilon subunit 3 OS=Homo sapiens OX=9606 GN=POLE3 PE=1 SV=1	16906.3	223.0+-2.22	5.0+-0.0	2	1.36985e+06	1.01701e+06	0	0	223	DPOE3_HUMAN	0.000138169	0.000111354	0	0		2	0	Unique
	DPOLB_HUMAN	DNA polymerase beta OS=Homo sapiens OX=9606 GN=POLB PE=1 SV=3	38324.8	179.93+-46.23	4.0+-0.0	2	1.90941e+06	1.70911e+06	0	0	179	DPOLB_HUMAN	0.000192591	0.000187133	0	0		2	0	Unique
	DSN1_HUMAN	Kinetochore-associated protein DSN1 homolog OS=Homo sapiens OX=9606 GN=DSN1 PE=1 SV=2	40384.2	166.05+-52.02	4.5+-1.5	2	1.0286e+06	692103	0	0	166	DSN1_HUMAN	0.000103749	7.57794e-05	0	0		2	0	Unique
	E2F3_HUMAN	Transcription factor E2F3 OS=Homo sapiens OX=9606 GN=E2F3 PE=1 SV=1	49530.3	153.83+-21.66	3.5+-0.5	2	2.40596e+06	1.10672e+06	0	0	153	E2F3_HUMAN	0.000242674	0.000121177	0	0		2	0	Unique
	E2F4_HUMAN	Transcription factor E2F4 OS=Homo sapiens OX=9606 GN=E2F4 PE=1 SV=2	44275.4	120.69+-0.0	3.0+-0.0	1	382604	814889	0	0	120	E2F4_HUMAN	3.8591e-05	8.92234e-05	0	0		2	0	Unique
	EGLN1_HUMAN	Egl nine homolog 1 OS=Homo sapiens OX=9606 GN=EGLN1 PE=1 SV=1	46847.2	98.54+-0.0	2.0+-0.0	1	70747.5	134164	0	0	98.	EGLN1_HUMAN	7.13587e-06	1.46898e-05	0	0		2	0	Unique
	ELMO2_HUMAN	Engulfment and cell motility protein 2 OS=Homo sapiens OX=9606 GN=ELMO2 PE=1 SV=2	83018.4	85.06+-0.0	3.0+-0.0	1	1.45035e+06	0	0	0	85.	ELMO2_HUMAN	0.000146288	0	0	0		2	0	Unique
	EPS8_HUMAN	Epidermal growth factor receptor kinase substrate 8 OS=Homo sapiens OX=9606 GN=EPS8 PE=1 SV=1	92166.6	68.19+-0.0	2.0+-0.0	1	1.72766e+06	753344	0	0	68.	EPS8_HUMAN	0.000174258	8.24848e-05	0	0		2	0	Unique
	EXOC3_HUMAN	Exocyst complex component 3 OS=Homo sapiens OX=9606 GN=EXOC3 PE=1 SV=3	85969.5	103.79+-26.79	2.0+-0.0	2	916240	630152	0	0	103	EXOC3_HUMAN	9.24156e-05	6.89963e-05	0	0		2	0	Unique
	EZH2_HUMAN	Histone-lysine N-methyltransferase EZH2 OS=Homo sapiens OX=9606 GN=EZH2 PE=1 SV=2	87247.3	82.18+-18.75	2.5+-0.5	2	1.09545e+06	814990	0	0	82.	EZH2_HUMAN	0.000110491	8.92345e-05	0	0		2	0	Unique
	FBX38_HUMAN	F-box only protein 38 OS=Homo sapiens OX=9606 GN=FBXO38 PE=1 SV=3	135740	211.7+-0.0	2.0+-0.0	1	0	92984.9	0	0	211	FBX38_HUMAN	0	1.01811e-05	0	0		2	0	Unique
	FBX41_HUMAN	F-box only protein 41 OS=Homo sapiens OX=9606 GN=FBXO41 PE=2 SV=5	95919.9	134.1+-0.0	3.0+-0.0	1	776884	481570	0	0	134	FBX41_HUMAN	7.83596e-05	5.27278e-05	0	0		2	0	Unique
	FOXO3_HUMAN	Forkhead box protein O3 OS=Homo sapiens OX=9606 GN=FOXO3 PE=1 SV=1	71517.3	182.34+-6.85	2.0+-0.0	2	193360	218897	0	0	182	FOXO3_HUMAN	1.95031e-05	2.39674e-05	0	0		2	0	Unique
	GA2L1_HUMAN	GAS2-like protein 1 OS=Homo sapiens OX=9606 GN=GAS2L1 PE=1 SV=2	73356.1	116.87+-0.0	2.0+-0.0	1	435029	561306	0	0	116	GA2L1_HUMAN	4.38788e-05	6.14583e-05	0	0		2	0	Unique
	GALA_HUMAN	Galanin peptides OS=Homo sapiens OX=9606 GN=GAL PE=1 SV=3	13293.9	83.73+-21.16	2.5+-0.5	2	205666	252608	0	0	83.	GALA_HUMAN	2.07442e-05	2.76585e-05	0	0		2	0	Unique
	GCFC2_HUMAN	GC-rich sequence DNA-binding factor 2 OS=Homo sapiens OX=9606 GN=GCFC2 PE=1 SV=2	89899.6	119.49+-0.0	2.0+-0.0	1	0	373944	0	0	119	GCFC2_HUMAN	0	4.09437e-05	0	0		2	0	Unique
	GEMI5_HUMAN	Gem-associated protein 5 OS=Homo sapiens OX=9606 GN=GEMIN5 PE=1 SV=3	170821	173.02+-33.91	5.0+-1.0	2	1.76777e+06	1.14194e+06	0	0	173	GEMI5_HUMAN	0.000178304	0.000125033	0	0		2	0	Unique
	GIT2_HUMAN	ARF GTPase-activating protein GIT2 OS=Homo sapiens OX=9606 GN=GIT2 PE=1 SV=2	85117.5	322.58+-7.81	6.0+-1.0	2	713577	2.06142e+06	0	0	322	GIT2_HUMAN	7.19742e-05	0.000225708	0	0		2	0	Unique
	GON4L_HUMAN	GON-4-like protein OS=Homo sapiens OX=9606 GN=GON4L PE=1 SV=1	250461	98.57+-13.71	2.0+-0.0	2	416057	575184	0	0	98.	GON4L_HUMAN	4.19651e-05	6.29778e-05	0	0		2	0	Unique
	GPS2_HUMAN	G protein pathway suppressor 2 OS=Homo sapiens OX=9606 GN=GPS2 PE=1 SV=3	36665.5	92.59+-0.0	4.0+-0.0	1	1.07019e+06	292815	0	0	92.	GPS2_HUMAN	0.000107944	3.20608e-05	0	0		2	0	Unique
	GSE1_HUMAN	Genetic suppressor element 1 OS=Homo sapiens OX=9606 GN=GSE1 PE=1 SV=3	136366	176.29+-0.0	4.0+-0.0	1	463516	911159	0	0	176	GSE1_HUMAN	4.67521e-05	9.97642e-05	0	0		2	0	Unique
	GT2D1_HUMAN	General transcription factor II-I repeat domain-containing protein 1 OS=Homo sapiens OX=9606 GN=GTF2IRD1 PE=1 SV=1	106903	91.56+-0.0	2.0+-0.0	1	0	96833.3	0	0	91.	GT2D1_HUMAN	0	1.06024e-05	0	0		2	0	Unique
	HCLS1_HUMAN	Hematopoietic lineage cell-specific protein OS=Homo sapiens OX=9606 GN=HCLS1 PE=1 SV=3	54095	134.24+-31.23	2.5+-0.5	2	791156	1.00608e+06	0	0	134	HCLS1_HUMAN	7.97991e-05	0.000110157	0	0		2	0	Unique
	HDAC4_HUMAN	Histone deacetylase 4 OS=Homo sapiens OX=9606 GN=HDAC4 PE=1 SV=3	119764	113.93+-6.77	3.0+-0.0	2	1.9337e+06	1929236	0	0	113	HDAC4_HUMAN	0.00019504	0.000211235	0	0		2	0	Unique
	HECD3_HUMAN	E3 ubiquitin-protein ligase HECTD3 OS=Homo sapiens OX=9606 GN=HECTD3 PE=1 SV=1	98134.9	80.44+-6.11	2.5+-0.5	2	334669	360000	0	0	80.	HECD3_HUMAN	3.37561e-05	3.94169e-05	0	0		2	0	Unique
	HM20B_HUMAN	SWI/SNF-related matrix-associated actin-dependent regulator of chromatin subfamily E member 1-related OS=Homo sapiens OX=9606 GN=HMG20B PE=1 SV=1	35904.6	124.59+-6.63	3.0+-0.0	2	1.77148e+06	1.14762e+06	0	0	124	HM20B_HUMAN	0.000178678	0.000125655	0	0		2	0	Unique
	HMBX1_HUMAN	Homeobox-containing protein 1 OS=Homo sapiens OX=9606 GN=HMBOX1 PE=1 SV=1	47420.2	245.41+-1.06	4.5+-0.5	2	2.26932e+06	2.04128e+06	0	0	245	HMBX1_HUMAN	0.000228892	0.000223503	0	0		2	0	Unique
	HNF4A_HUMAN	Hepatocyte nuclear factor 4-alpha OS=Homo sapiens OX=9606 GN=HNF4A PE=1 SV=3	53492.1	263.88+-55.32	4.5+-1.5	2	2993339	989084	0	0	263	HNF4A_HUMAN	0.00030192	0.000108296	0	0		2	0	Unique
	HOMEZ_HUMAN	Homeobox and leucine zipper protein Homez OS=Homo sapiens OX=9606 GN=HOMEZ PE=1 SV=2	61658.5	164.41+-2.59	3.5+-0.5	2	1548947	1.92446e+06	0	0	164	HOMEZ_HUMAN	0.000156233	0.000210712	0	0		2	0	Unique
	I2BPL_HUMAN	Probable E3 ubiquitin-protein ligase IRF2BPL OS=Homo sapiens OX=9606 GN=IRF2BPL PE=1 SV=1	83576.3	119.69+-22.06	3.0+-1.0	2	704412	443742	0	0	119	I2BPL_HUMAN	7.10497e-05	4.8586e-05	0	0		2	0	Unique
	ICE2_HUMAN	Little elongation complex subunit 2 OS=Homo sapiens OX=9606 GN=ICE2 PE=1 SV=2	110968	216.32+-11.12	5.0+-0.0	2	821644	994708	0	0	216	ICE2_HUMAN	8.28742e-05	0.000108912	0	0		2	0	Unique
	IKZF3_HUMAN	Zinc finger protein Aiolos OS=Homo sapiens OX=9606 GN=IKZF3 PE=1 SV=2	59012.2	86.1+-7.63	2.0+-0.0	2	882565	914150	0	0	86.	IKZF3_HUMAN	8.9019e-05	0.000100092	0	0		2	0	Unique
	INT1_HUMAN	Integrator complex subunit 1 OS=Homo sapiens OX=9606 GN=INTS1 PE=1 SV=2	246366	152.74+-0.0	2.0+-0.0	1	433357	352426	0	0	152	INT1_HUMAN	4.37101e-05	3.85876e-05	0	0		2	0	Unique
	INT12_HUMAN	Integrator complex subunit 12 OS=Homo sapiens OX=9606 GN=INTS12 PE=1 SV=1	49233.3	95.69+-13.67	2.0+-0.0	2	632167	639148	0	0	95.	INT12_HUMAN	6.37628e-05	6.99813e-05	0	0		2	0	Unique
	ITCH_HUMAN	E3 ubiquitin-protein ligase Itchy homolog OS=Homo sapiens OX=9606 GN=ITCH PE=1 SV=2	103593	131.06+-2.66	2.0+-0.0	2	441758	506444	0	0	131	ITCH_HUMAN	4.45575e-05	5.54513e-05	0	0		2	0	Unique
	JUNB_HUMAN	Transcription factor jun-B OS=Homo sapiens OX=9606 GN=JUNB PE=1 SV=1	36028.2	222.52+-79.71	3.5+-0.5	2	811465	445023	0	0	222	JUNB_HUMAN	8.18476e-05	4.87262e-05	0	0		2	0	Unique
	KCNH1_HUMAN	Potassium voltage-gated channel subfamily H member 1 OS=Homo sapiens OX=9606 GN=KCNH1 PE=1 SV=1	112435	47.52+-1.79	2.5+-0.5	2	220559	437079	0	0	47.	KCNH1_HUMAN	2.22464e-05	4.78564e-05	0	0		2	0	Unique
	KIF4B_HUMAN	Chromosome-associated kinesin KIF4B OS=Homo sapiens OX=9606 GN=KIF4B PE=2 SV=2	141829	388.01+-30.43	9.0+-1.0	2	4.16573e+06	4.75551e+06	0	0	388	KIF4B_HUMAN	0.000420172	0.000520689	0	0		2	0	Unique
	KLH36_HUMAN	Kelch-like protein 36 OS=Homo sapiens OX=9606 GN=KLHL36 PE=1 SV=1	70821	132.94+-31.53	3.0+-1.0	2	754399	860481	0	0	132	KLH36_HUMAN	7.60917e-05	9.42154e-05	0	0		2	0	Unique
	KMT2A_HUMAN	Histone-lysine N-methyltransferase 2A OS=Homo sapiens OX=9606 GN=KMT2A PE=1 SV=5	436058	88.81+-0.0	2.0+-0.0	1	110952	308575	0	0	88.	KMT2A_HUMAN	1.11911e-05	3.37863e-05	0	0		2	0	Unique
	KMT2C_HUMAN	Histone-lysine N-methyltransferase 2C OS=Homo sapiens OX=9606 GN=KMT2C PE=1 SV=3	548270	150.57+-27.27	2.5+-0.5	2	1.01478e+06	2.16428e+06	0	0	150	KMT2C_HUMAN	0.000102354	0.00023697	0	0		2	0	Unique
	KPB2_HUMAN	Phosphorylase b kinase regulatory subunit alpha, liver isoform OS=Homo sapiens OX=9606 GN=PHKA2 PE=1 SV=1	139404	151.96+-39.16	3.0+-0.0	2	567042	917212	0	0	151	KPB2_HUMAN	5.71941e-05	0.000100427	0	0		2	0	Unique
	KS6B2_HUMAN	Ribosomal protein S6 kinase beta-2 OS=Homo sapiens OX=9606 GN=RPS6KB2 PE=1 SV=2	53820.7	174.81+-3.83	3.0+-0.0	2	1.23318e+06	1.13682e+06	0	0	174	KS6B2_HUMAN	0.000124384	0.000124473	0	0		2	0	Unique
	LASP1_HUMAN	LIM and SH3 domain protein 1 OS=Homo sapiens OX=9606 GN=LASP1 PE=1 SV=2	30097.4	244.98+-8.23	5.0+-0.0	2	3.14872e+06	2.30216e+06	0	0	244	LASP1_HUMAN	0.000317593	0.000252067	0	0		2	0	Unique
	LIN9_HUMAN	Protein lin-9 homolog OS=Homo sapiens OX=9606 GN=LIN9 PE=1 SV=1	62420.1	107.52+-8.64	3.0+-0.0	2	779415	1807097	0	0	107	LIN9_HUMAN	7.86149e-05	0.000197862	0	0		2	0	Unique
	LIPA4_HUMAN	Liprin-alpha-4 OS=Homo sapiens OX=9606 GN=PPFIA4 PE=2 SV=3	134948	132.69+-12.05	5.0+-0.0	2	5092542	6.53524e+06	0	0	132	LIPA4_HUMAN	0.000513654	0.000715554	0	0		2	0	Unique
	LPIN1_HUMAN	Phosphatidate phosphatase LPIN1 OS=Homo sapiens OX=9606 GN=LPIN1 PE=1 SV=2	99286.7	145.38+-0.0	3.0+-0.0	1	288966	764841	0	0	145	LPIN1_HUMAN	2.91463e-05	8.37436e-05	0	0		2	0	Unique
	LS14B_HUMAN	Protein LSM14 homolog B OS=Homo sapiens OX=9606 GN=LSM14B PE=1 SV=1	42159.3	154.59+-32.16	2.0+-0.0	2	324630	319751	0	0	154	LS14B_HUMAN	3.27435e-05	3.50101e-05	0	0		2	0	Unique
	M4K5_HUMAN	Mitogen-activated protein kinase kinase kinase kinase 5 OS=Homo sapiens OX=9606 GN=MAP4K5 PE=1 SV=2	96046.8	80.8+-21.68	2.0+-0.0	2	323478	321823	0	0	80.	M4K5_HUMAN	3.26273e-05	3.52369e-05	0	0		2	0	Unique
	MBD2_HUMAN	Methyl-CpG-binding domain protein 2 OS=Homo sapiens OX=9606 GN=MBD2 PE=1 SV=1	43570	364.59+-40.87	9.0+-2.0	2	6861770	4.42314e+06	0	0	364	MBD2_HUMAN	0.000692105	0.000484297	0	0		2	0	Unique
	MBNL1_HUMAN	Muscleblind-like protein 1 OS=Homo sapiens OX=9606 GN=MBNL1 PE=1 SV=2	42531.3	40.62+-0.0	2.0+-0.0	1	1407635	1.41433e+06	0	0	40.	MBNL1_HUMAN	0.00014198	0.000154857	0	0		2	0	Unique
	MD13L_HUMAN	Mediator of RNA polymerase II transcription subunit 13-like OS=Homo sapiens OX=9606 GN=MED13L PE=1 SV=1	245355	101.88+-3.15	2.0+-0.0	2	437995	797145	0	0	101	MD13L_HUMAN	4.41779e-05	8.72807e-05	0	0		2	0	Unique
	MED10_HUMAN	Mediator of RNA polymerase II transcription subunit 10 OS=Homo sapiens OX=9606 GN=MED10 PE=1 SV=1	15792.1	125.04+-6.02	3.0+-0.0	2	1.04665e+06	1.31957e+06	0	0	125	MED10_HUMAN	0.000105569	0.000144482	0	0		2	0	Unique
	MED11_HUMAN	Mediator of RNA polymerase II transcription subunit 11 OS=Homo sapiens OX=9606 GN=MED11 PE=1 SV=2	13234.7	70.16+-3.47	2.0+-0.0	2	2149470	1772456	0	0	70.	MED11_HUMAN	0.000216804	0.000194069	0	0		2	0	Unique
	MED13_HUMAN	Mediator of RNA polymerase II transcription subunit 13 OS=Homo sapiens OX=9606 GN=MED13 PE=1 SV=3	242680	107.41+-7.49	2.0+-0.0	2	215970	341160	0	0	107	MED13_HUMAN	2.17835e-05	3.73542e-05	0	0		2	0	Unique
	MED24_HUMAN	Mediator of RNA polymerase II transcription subunit 24 OS=Homo sapiens OX=9606 GN=MED24 PE=1 SV=1	111716	335.92+-66.94	5.0+-1.0	2	1.03681e+06	1.19055e+06	0	0	335	MED24_HUMAN	0.000104577	0.000130355	0	0		2	0	Unique
	MED26_HUMAN	Mediator of RNA polymerase II transcription subunit 26 OS=Homo sapiens OX=9606 GN=MED26 PE=1 SV=2	65862.7	128.26+-0.0	2.0+-0.0	1	644135	702473	0	0	128	MED26_HUMAN	6.497e-05	7.69149e-05	0	0		2	0	Unique
	MEIS1_HUMAN	Homeobox protein Meis1 OS=Homo sapiens OX=9606 GN=MEIS1 PE=1 SV=1	43330.6	184.57+-18.33	4.5+-0.5	2	850461	885742	0	0	184	MEIS1_HUMAN	8.57808e-05	9.69812e-05	0	0		2	0	Unique
	MINT_HUMAN	Msx2-interacting protein OS=Homo sapiens OX=9606 GN=SPEN PE=1 SV=1	403030	137.07+-72.66	3.0+-1.0	2	1.30337e+06	756607	0	0	137	MINT_HUMAN	0.000131463	8.28421e-05	0	0		2	0	Unique
	MLXIP_HUMAN	MLX-interacting protein OS=Homo sapiens OX=9606 GN=MLXIP PE=1 SV=2	101863	79.65+-0.0	2.0+-0.0	1	0	742567	0	0	79.	MLXIP_HUMAN	0	8.13048e-05	0	0		2	0	Unique
	MPH6_HUMAN	M-phase phosphoprotein 6 OS=Homo sapiens OX=9606 GN=MPHOSPH6 PE=1 SV=2	19068.6	130.16+-19.24	2.5+-0.5	2	1.03103e+06	1.27478e+06	0	0	130	MPH6_HUMAN	0.000103994	0.000139577	0	0		2	0	Unique
	MPP10_HUMAN	U3 small nucleolar ribonucleoprotein protein MPP10 OS=Homo sapiens OX=9606 GN=MPHOSPH10 PE=1 SV=2	78929.7	232.21+-18.13	4.0+-0.0	2	1.32112e+06	1053034	0	0	232	MPP10_HUMAN	0.000133254	0.000115298	0	0		2	0	Unique
	MS3L2_HUMAN	Putative male-specific lethal-3 protein-like 2 OS=Homo sapiens OX=9606 GN=MSL3P1 PE=5 SV=1	51494	85.86+-0.0	3.0+-0.0	1	469449	0	0	0	85.	MS3L2_HUMAN	4.73505e-05	0	0	0		2	0	Unique
	MYBB_HUMAN	Myb-related protein B OS=Homo sapiens OX=9606 GN=MYBL2 PE=1 SV=1	79342.6	112.79+-10.04	3.0+-0.0	2	1.60505e+06	2.54156e+06	0	0	112	MYBB_HUMAN	0.000161892	0.000278279	0	0		2	0	Unique
	MYRF_HUMAN	Myelin regulatory factor OS=Homo sapiens OX=9606 GN=MYRF PE=1 SV=3	125402	118.72+-3.02	2.0+-0.0	2	2.03387e+06	2.22718e+06	0	0	118	MYRF_HUMAN	0.000205145	0.000243858	0	0		2	0	Unique
	NCOA2_HUMAN	Nuclear receptor coactivator 2 OS=Homo sapiens OX=9606 GN=NCOA2 PE=1 SV=2	159911	69.09+-0.0	2.0+-0.0	1	147918	287628	0	0	69.	NCOA2_HUMAN	1.49196e-05	3.14929e-05	0	0		2	0	Unique
	NCOA3_HUMAN	Nuclear receptor coactivator 3 OS=Homo sapiens OX=9606 GN=NCOA3 PE=1 SV=1	156107	97.48+-0.0	2.0+-0.0	1	262322	644417	0	0	97.	NCOA3_HUMAN	2.64588e-05	7.05582e-05	0	0		2	0	Unique
	NCOA6_HUMAN	Nuclear receptor coactivator 6 OS=Homo sapiens OX=9606 GN=NCOA6 PE=1 SV=3	219350	44.78+-0.0	2.0+-0.0	1	441132	0	0	0	44.	NCOA6_HUMAN	4.44943e-05	0	0	0		2	0	Unique
	NEK2_HUMAN	Serine/threonine-protein kinase Nek2 OS=Homo sapiens OX=9606 GN=NEK2 PE=1 SV=1	52130.1	61.58+-0.0	2.0+-0.0	1	513790	333259	0	0	61.	NEK2_HUMAN	5.18229e-05	3.6489e-05	0	0		2	0	Unique
	NFRKB_HUMAN	Nuclear factor related to kappa-B-binding protein OS=Homo sapiens OX=9606 GN=NFRKB PE=1 SV=2	139372	297.09+-17.65	5.0+-1.0	2	1.55696e+06	918342	0	0	297	NFRKB_HUMAN	0.000157041	0.000100551	0	0		2	0	Unique
	NHS_HUMAN	Nance-Horan syndrome protein OS=Homo sapiens OX=9606 GN=NHS PE=1 SV=2	180451	140.49+-0.0	2.0+-0.0	1	476086	484313	0	0	140	NHS_HUMAN	4.80199e-05	5.30282e-05	0	0		2	0	Unique
	NHSL1_HUMAN	NHS-like protein 1 OS=Homo sapiens OX=9606 GN=NHSL1 PE=1 SV=2	172103	317.64+-0.0	3.0+-0.0	1	275088	783951	0	0	317	NHSL1_HUMAN	2.77465e-05	8.5836e-05	0	0		2	0	Unique
	P3C2A_HUMAN	Phosphatidylinositol 4-phosphate 3-kinase C2 domain-containing subunit alpha OS=Homo sapiens OX=9606 GN=PIK3C2A PE=1 SV=2	192156	227.03+-19.07	6.0+-1.0	2	2.21622e+06	1.54333e+06	0	0	227	P3C2A_HUMAN	0.000223536	0.000168982	0	0		2	0	Unique
	PACS1_HUMAN	Phosphofurin acidic cluster sorting protein 1 OS=Homo sapiens OX=9606 GN=PACS1 PE=1 SV=2	105233	95.97+-26.58	2.5+-0.5	2	230147	141440	0	0	95.	PACS1_HUMAN	2.32136e-05	1.54865e-05	0	0		2	0	Unique
	PAR6B_HUMAN	Partitioning defective 6 homolog beta OS=Homo sapiens OX=9606 GN=PARD6B PE=1 SV=1	41214.1	94.95+-0.0	3.0+-0.0	1	574185	0	0	0	94.	PAR6B_HUMAN	5.79145e-05	0	0	0		2	0	Unique
	PBX2_HUMAN	Pre-B-cell leukemia transcription factor 2 OS=Homo sapiens OX=9606 GN=PBX2 PE=1 SV=2	46137.6	209.06+-19.87	4.0+-0.0	2	513174	843024	0	0	209	PBX2_HUMAN	5.17608e-05	9.2304e-05	0	0		2	0	Unique
	PDCD2_HUMAN	Programmed cell death protein 2 OS=Homo sapiens OX=9606 GN=PDCD2 PE=1 SV=2	39650.3	146.1+-7.41	4.0+-1.0	2	820525	401866	0	0	146	PDCD2_HUMAN	8.27614e-05	4.40009e-05	0	0		2	0	Unique
	PEPL_HUMAN	Periplakin OS=Homo sapiens OX=9606 GN=PPL PE=1 SV=4	205193	120.24+-0.0	3.0+-0.0	1	326498	288408	0	0	120	PEPL_HUMAN	3.29319e-05	3.15782e-05	0	0		2	0	Unique
	PF21A_HUMAN	PHD finger protein 21A OS=Homo sapiens OX=9606 GN=PHF21A PE=1 SV=1	75434.3	212.08+-72.3	4.5+-1.5	2	1.03089e+06	1.57649e+06	0	0	212	PF21A_HUMAN	0.00010398	0.000172612	0	0		2	0	Unique
	PI42A_HUMAN	Phosphatidylinositol 5-phosphate 4-kinase type-2 alpha OS=Homo sapiens OX=9606 GN=PIP4K2A PE=1 SV=2	46423.6	453.9+-65.34	10.0+-2.0	2	3.31594e+06	4.8513e+06	0	0	453	PI42A_HUMAN	0.000334459	0.000531177	0	0		2	0	Unique
	PI4KB_HUMAN	Phosphatidylinositol 4-kinase beta OS=Homo sapiens OX=9606 GN=PI4KB PE=1 SV=1	92062.7	228.17+-10.56	5.0+-0.0	2	1.87396e+06	3.19828e+06	0	0	228	PI4KB_HUMAN	0.000189015	0.000350185	0	0		2	0	Unique
	PI51C_HUMAN	Phosphatidylinositol 4-phosphate 5-kinase type-1 gamma OS=Homo sapiens OX=9606 GN=PIP5K1C PE=1 SV=2	73499.6	141.83+-7.42	3.0+-0.0	2	5287487	2.8364e+06	0	0	141	PI51C_HUMAN	0.000533317	0.000310561	0	0		2	0	Unique
	PININ_HUMAN	Pinin OS=Homo sapiens OX=9606 GN=PNN PE=1 SV=5	81693	97.19+-19.55	2.0+-0.0	2	758222	534776	0	0	97.	PININ_HUMAN	7.64773e-05	5.85534e-05	0	0		2	0	Unique
	PLCB3_HUMAN	1-phosphatidylinositol 4,5-bisphosphate phosphodiesterase beta-3 OS=Homo sapiens OX=9606 GN=PLCB3 PE=1 SV=2	139511	75.25+-0.0	2.0+-0.0	1	304034	0	0	0	75.	PLCB3_HUMAN	3.06661e-05	0	0	0		2	0	Unique
	PMF1_HUMAN	Polyamine-modulated factor 1 OS=Homo sapiens OX=9606 GN=PMF1 PE=1 SV=2	23495.9	96.33+-0.0	2.0+-0.0	1	315042	202625	0	0	96.	PMF1_HUMAN	3.17764e-05	2.21857e-05	0	0		2	0	Unique
	PNKP_HUMAN	Bifunctional polynucleotide phosphatase/kinase OS=Homo sapiens OX=9606 GN=PNKP PE=1 SV=1	57553.7	501.91+-32.1	10.0+-0.0	2	6.99888e+06	6.18209e+06	0	0	501	PNKP_HUMAN	0.000705934	0.000676887	0	0		2	0	Unique
	PP12C_HUMAN	Protein phosphatase 1 regulatory subunit 12C OS=Homo sapiens OX=9606 GN=PPP1R12C PE=1 SV=1	85286.1	100.71+-24.26	2.5+-0.5	2	453588	543208	0	0	100	PP12C_HUMAN	4.57506e-05	5.94767e-05	0	0		2	0	Unique
	PTN23_HUMAN	Tyrosine-protein phosphatase non-receptor type 23 OS=Homo sapiens OX=9606 GN=PTPN23 PE=1 SV=1	179830	357.48+-29.71	8.0+-0.0	2	2.58124e+06	2863897	0	0	357	PTN23_HUMAN	0.000260354	0.000313573	0	0		2	0	Unique
	R3GEF_HUMAN	Guanine nucleotide exchange factor for Rab-3A OS=Homo sapiens OX=9606 GN=RAB3IL1 PE=1 SV=1	43179.8	145.09+-0.0	3.0+-0.0	1	1.68803e+06	1051728	0	0	145	R3GEF_HUMAN	0.000170261	0.000115155	0	0		2	0	Unique
	RAB3I_HUMAN	Rab-3A-interacting protein OS=Homo sapiens OX=9606 GN=RAB3IP PE=1 SV=1	53672	98.16+-2.09	2.0+-0.0	2	854382	559695	0	0	98.	RAB3I_HUMAN	8.61763e-05	6.12819e-05	0	0		2	0	Unique
	RB12B_HUMAN	RNA-binding protein 12B OS=Homo sapiens OX=9606 GN=RBM12B PE=1 SV=2	118372	90.21+-0.0	2.0+-0.0	1	493854	402655	0	0	90.	RB12B_HUMAN	4.98121e-05	4.40873e-05	0	0		2	0	Unique
	RBM4_HUMAN	RNA-binding protein 4 OS=Homo sapiens OX=9606 GN=RBM4 PE=1 SV=1	40687.8	285.57+-0.0	3.0+-0.0	1	0	1.42531e+06	0	0	285	RBM4_HUMAN	0	0.000156059	0	0		2	0	Unique
	RD21L_HUMAN	Double-strand-break repair protein rad21-like protein 1 OS=Homo sapiens OX=9606 GN=RAD21L1 PE=2 SV=3	63682.9	86.13+-0.0	3.0+-0.0	1	0	1.17462e+06	0	0	86.	RD21L_HUMAN	0	0.000128611	0	0		2	0	Unique
	RFIP1_HUMAN	Rab11 family-interacting protein 1 OS=Homo sapiens OX=9606 GN=RAB11FIP1 PE=1 SV=3	137482	178.59+-16.8	3.0+-0.0	2	772585	412094	0	0	178	RFIP1_HUMAN	7.7926e-05	4.51208e-05	0	0		2	0	Unique
	RFX1_HUMAN	MHC class II regulatory factor RFX1 OS=Homo sapiens OX=9606 GN=RFX1 PE=1 SV=2	105035	95.33+-0.0	2.0+-0.0	1	895777	0	0	0	95.	RFX1_HUMAN	9.03516e-05	0	0	0		2	0	Unique
	RFXK_HUMAN	DNA-binding protein RFXANK OS=Homo sapiens OX=9606 GN=RFXANK PE=1 SV=2	28199.2	201.54+-83.57	3.5+-0.5	2	1.07407e+06	821002	0	0	201	RFXK_HUMAN	0.000108335	8.98927e-05	0	0		2	0	Unique
	RIOK3_HUMAN	Serine/threonine-protein kinase RIO3 OS=Homo sapiens OX=9606 GN=RIOK3 PE=1 SV=2	59511.5	107.37+-3.6	3.0+-0.0	2	816494	1156726	0	0	107	RIOK3_HUMAN	8.23548e-05	0.000126652	0	0		2	0	Unique
	RIPR1_HUMAN	Rho family-interacting cell polarization regulator 1 OS=Homo sapiens OX=9606 GN=RIPOR1 PE=1 SV=1	133423	62.23+-0.0	2.0+-0.0	1	852879	251205	0	0	62.	RIPR1_HUMAN	8.60248e-05	2.75048e-05	0	0		2	0	Unique
	RNF10_HUMAN	RING finger protein 10 OS=Homo sapiens OX=9606 GN=RNF10 PE=1 SV=2	90954.1	43.14+-0.0	3.0+-0.0	1	1.05406e+06	155053	0	0	43.	RNF10_HUMAN	0.000106316	1.6977e-05	0	0		2	0	Unique
	RPA1_HUMAN	DNA-directed RNA polymerase I subunit RPA1 OS=Homo sapiens OX=9606 GN=POLR1A PE=1 SV=2	196683	196.97+-39.5	4.0+-0.0	2	875310	1648780	0	0	196	RPA1_HUMAN	8.82872e-05	0.000180527	0	0		2	0	Unique
	RPA2_HUMAN	DNA-directed RNA polymerase I subunit RPA2 OS=Homo sapiens OX=9606 GN=POLR1B PE=1 SV=2	129799	82.4+-5.28	2.0+-0.0	2	336391	351056	0	0	82.	RPA2_HUMAN	3.39297e-05	3.84377e-05	0	0		2	0	Unique
	RPA34_HUMAN	DNA-directed RNA polymerase I subunit RPA34 OS=Homo sapiens OX=9606 GN=CD3EAP PE=1 SV=1	55236.5	194.23+-38.39	3.0+-1.0	2	1.0851e+06	2799833	0	0	194	RPA34_HUMAN	0.000109448	0.000306558	0	0		2	0	Unique
	RPAP1_HUMAN	RNA polymerase II-associated protein 1 OS=Homo sapiens OX=9606 GN=RPAP1 PE=1 SV=3	154198	189.55+-65.8	4.5+-0.5	2	1.66963e+06	1.56589e+06	0	0	189	RPAP1_HUMAN	0.000168406	0.000171452	0	0		2	0	Unique
	RSRC1_HUMAN	Serine/Arginine-related protein 53 OS=Homo sapiens OX=9606 GN=RSRC1 PE=1 SV=1	38654.4	163.29+-12.81	2.0+-0.0	2	642962	947680	0	0	163	RSRC1_HUMAN	6.48517e-05	0.000103763	0	0		2	0	Unique
	RUSD2_HUMAN	RNA pseudouridylate synthase domain-containing protein 2 OS=Homo sapiens OX=9606 GN=RPUSD2 PE=1 SV=2	61843.4	95.03+-11.43	2.0+-0.0	2	170793	401401	0	0	95.	RUSD2_HUMAN	1.72269e-05	4.395e-05	0	0		2	0	Unique
	S23IP_HUMAN	SEC23-interacting protein OS=Homo sapiens OX=9606 GN=SEC23IP PE=1 SV=1	111691	122.82+-3.43	4.0+-0.0	2	2.78067e+06	2.47043e+06	0	0	122	S23IP_HUMAN	0.00028047	0.000270492	0	0		2	0	Unique
	SAFB1_HUMAN	Scaffold attachment factor B1 OS=Homo sapiens OX=9606 GN=SAFB PE=1 SV=4	103036	733.37+-27.22	21.0+-1.0	2	1.66527e+07	1.11963e+07	0	0	733	SAFB1_HUMAN	0.00167966	0.0012259	0	0		2	0	Unique
	SBNO2_HUMAN	Protein strawberry notch homolog 2 OS=Homo sapiens OX=9606 GN=SBNO2 PE=2 SV=3	151550	175.32+-0.0	3.0+-0.0	1	465964	168093	0	0	175	SBNO2_HUMAN	4.6999e-05	1.84048e-05	0	0		2	0	Unique
	SCLY_HUMAN	Selenocysteine lyase OS=Homo sapiens OX=9606 GN=SCLY PE=1 SV=4	48403.7	144.31+-47.15	3.0+-1.0	2	798672	1.35319e+06	0	0	144	SCLY_HUMAN	8.05572e-05	0.000148163	0	0		2	0	Unique
	SEN34_HUMAN	tRNA-splicing endonuclease subunit Sen34 OS=Homo sapiens OX=9606 GN=TSEN34 PE=1 SV=1	33745.5	209.92+-0.0	2.0+-0.0	1	1.27224e+06	1102923	0	0	209	SEN34_HUMAN	0.000128323	0.000120761	0	0		2	0	Unique
	SH3K1_HUMAN	SH3 domain-containing kinase-binding protein 1 OS=Homo sapiens OX=9606 GN=SH3KBP1 PE=1 SV=2	73252.8	139.83+-18.85	3.0+-1.0	2	1.31103e+06	1.33949e+06	0	0	139	SH3K1_HUMAN	0.000132235	0.000146663	0	0		2	0	Unique
	SI1L3_HUMAN	Signal-induced proliferation-associated 1-like protein 3 OS=Homo sapiens OX=9606 GN=SIPA1L3 PE=1 SV=3	195801	97.52+-26.03	2.5+-0.5	2	436789	431757	0	0	97.	SI1L3_HUMAN	4.40563e-05	4.72738e-05	0	0		2	0	Unique
	SMAD3_HUMAN	Mothers against decapentaplegic homolog 3 OS=Homo sapiens OX=9606 GN=SMAD3 PE=1 SV=1	48905.1	99.02+-1.0	2.5+-0.5	2	1834242	1.04609e+06	0	0	99.	SMAD3_HUMAN	0.000185009	0.000114538	0	0		2	0	Unique
	SMAD5_HUMAN	Mothers against decapentaplegic homolog 5 OS=Homo sapiens OX=9606 GN=SMAD5 PE=1 SV=1	52909	82.58+-0.0	2.0+-0.0	1	640319	515737	0	0	82.	SMAD5_HUMAN	6.45851e-05	5.64688e-05	0	0		2	0	Unique
	SMG1_HUMAN	Serine/threonine-protein kinase SMG1 OS=Homo sapiens OX=9606 GN=SMG1 PE=1 SV=3	414347	158.06+-12.14	3.0+-0.0	2	478902	691132	0	0	158	SMG1_HUMAN	4.83039e-05	7.56731e-05	0	0		2	0	Unique
	SNPC5_HUMAN	snRNA-activating protein complex subunit 5 OS=Homo sapiens OX=9606 GN=SNAPC5 PE=1 SV=1	11321.5	156.03+-0.18	2.0+-0.0	2	1419105	1237815	0	0	156	SNPC5_HUMAN	0.000143137	0.00013553	0	0		2	0	Unique
	SOSB1_HUMAN	SOSS complex subunit B1 OS=Homo sapiens OX=9606 GN=NABP2 PE=1 SV=1	22495.2	177.81+-76.16	3.0+-1.0	2	281703	514564	0	0	177	SOSB1_HUMAN	2.84136e-05	5.63404e-05	0	0		2	0	Unique
	SOSSC_HUMAN	SOSS complex subunit C OS=Homo sapiens OX=9606 GN=INIP PE=1 SV=1	11417.8	71.39+-26.17	2.5+-0.5	2	1.08655e+06	1.30961e+06	0	0	71.	SOSSC_HUMAN	0.000109593	0.000143391	0	0		2	0	Unique
	SOX13_HUMAN	Transcription factor SOX-13 OS=Homo sapiens OX=9606 GN=SOX13 PE=1 SV=3	69697.7	131.7+-1.81	2.0+-0.0	2	292115	627809	0	0	131	SOX13_HUMAN	2.94639e-05	6.87398e-05	0	0		2	0	Unique
	SOX7_HUMAN	Transcription factor SOX-7 OS=Homo sapiens OX=9606 GN=SOX7 PE=1 SV=1	42512.8	91.93+-0.0	2.0+-0.0	1	0	203416	0	0	91.	SOX7_HUMAN	0	2.22723e-05	0	0		2	0	Unique
	SRCAP_HUMAN	Helicase SRCAP OS=Homo sapiens OX=9606 GN=SRCAP PE=1 SV=3	344996	230.6+-26.38	4.0+-0.0	2	1.13088e+06	1.22834e+06	0	0	230	SRCAP_HUMAN	0.000114065	0.000134493	0	0		2	0	Unique
	STAG2_HUMAN	Cohesin subunit SA-2 OS=Homo sapiens OX=9606 GN=STAG2 PE=1 SV=3	142433	204.1+-35.83	5.5+-0.5	2	1.42524e+06	1.29076e+06	0	0	204	STAG2_HUMAN	0.000143755	0.000141327	0	0		2	0	Unique
	SYMPK_HUMAN	Symplekin OS=Homo sapiens OX=9606 GN=SYMPK PE=1 SV=2	141915	292.84+-70.17	5.5+-1.5	2	2.85816e+06	2.04202e+06	0	0	292	SYMPK_HUMAN	0.000288286	0.000223584	0	0		2	0	Unique
	SYNJ2_HUMAN	Synaptojanin-2 OS=Homo sapiens OX=9606 GN=SYNJ2 PE=1 SV=3	166575	149.55+-0.0	3.0+-0.0	1	0	609578	0	0	149	SYNJ2_HUMAN	0	6.67436e-05	0	0		2	0	Unique
	TAD2B_HUMAN	Transcriptional adapter 2-beta OS=Homo sapiens OX=9606 GN=TADA2B PE=1 SV=2	49009.8	105.34+-2.12	2.0+-0.0	2	316963	265826	0	0	105	TAD2B_HUMAN	3.19701e-05	2.91058e-05	0	0		2	0	Unique
	TAF9_HUMAN	Transcription initiation factor TFIID subunit 9 OS=Homo sapiens OX=9606 GN=TAF9 PE=1 SV=1	29069.7	262.69+-93.35	4.5+-0.5	2	1786813	1.66208e+06	0	0	262	TAF9_HUMAN	0.000180225	0.000181984	0	0		2	0	Unique
	TAOK2_HUMAN	Serine/threonine-protein kinase TAO2 OS=Homo sapiens OX=9606 GN=TAOK2 PE=1 SV=2	138964	172.33+-12.74	5.0+-1.0	2	3.02581e+06	3.57223e+06	0	0	172	TAOK2_HUMAN	0.000305195	0.000391129	0	0		2	0	Unique
	TE2IP_HUMAN	Telomeric repeat-binding factor 2-interacting protein 1 OS=Homo sapiens OX=9606 GN=TERF2IP PE=1 SV=1	44403.9	190.78+-21.42	3.0+-0.0	2	681929	1.27364e+06	0	0	190	TE2IP_HUMAN	6.8782e-05	0.000139453	0	0		2	0	Unique
	TERF2_HUMAN	Telomeric repeat-binding factor 2 OS=Homo sapiens OX=9606 GN=TERF2 PE=1 SV=3	59727.6	373.66+-43.05	9.0+-1.0	2	2.96746e+06	3.33902e+06	0	0	373	TERF2_HUMAN	0.000299309	0.000365594	0	0		2	0	Unique
	TF7L2_HUMAN	Transcription factor 7-like 2 OS=Homo sapiens OX=9606 GN=TCF7L2 PE=1 SV=2	68389.5	140.94+-18.38	2.5+-0.5	2	1637961	928094	0	0	140	TF7L2_HUMAN	0.000165211	0.000101618	0	0		2	0	Unique
	TFCP2_HUMAN	Alpha-globin transcription factor CP2 OS=Homo sapiens OX=9606 GN=TFCP2 PE=1 SV=2	57675.9	179.33+-41.24	3.5+-0.5	2	1.39225e+06	1.18505e+06	0	0	179	TFCP2_HUMAN	0.000140428	0.000129753	0	0		2	0	Unique
	THOC1_HUMAN	THO complex subunit 1 OS=Homo sapiens OX=9606 GN=THOC1 PE=1 SV=1	76359.8	121.2+-0.0	2.0+-0.0	1	1448151	555016	0	0	121	THOC1_HUMAN	0.000146066	6.07696e-05	0	0		2	0	Unique
	TIM_HUMAN	Protein timeless homolog OS=Homo sapiens OX=9606 GN=TIMELESS PE=1 SV=2	139598	544.54+-6.8	11.0+-1.0	2	4.77002e+06	5725221	0	0	544	TIM_HUMAN	0.000481123	0.000626863	0	0		2	0	Unique
	TLS1_HUMAN	Telomere length and silencing protein 1 homolog OS=Homo sapiens OX=9606 GN=C9orf78 PE=1 SV=1	33724.2	42.63+-0.0	2.0+-0.0	1	307910	0	0	0	42.	TLS1_HUMAN	3.1057e-05	0	0	0		2	0	Unique
	TRI38_HUMAN	E3 ubiquitin-protein ligase TRIM38 OS=Homo sapiens OX=9606 GN=TRIM38 PE=1 SV=1	54635.7	130.49+-0.0	2.0+-0.0	1	679632	581878	0	0	130	TRI38_HUMAN	6.85504e-05	6.37107e-05	0	0		2	0	Unique
	TRI47_HUMAN	E3 ubiquitin-protein ligase TRIM47 OS=Homo sapiens OX=9606 GN=TRIM47 PE=1 SV=2	70970.4	452.46+-44.34	8.5+-0.5	2	6.16352e+06	5.06434e+06	0	0	452	TRI47_HUMAN	0.000621677	0.000554503	0	0		2	0	Unique
	TRIP4_HUMAN	Activating signal cointegrator 1 OS=Homo sapiens OX=9606 GN=TRIP4 PE=1 SV=4	66960.2	84.68+-0.0	2.0+-0.0	1	1.01251e+06	457321	0	0	84.	TRIP4_HUMAN	0.000102126	5.00728e-05	0	0		2	0	Unique
	TS101_HUMAN	Tumor susceptibility gene 101 protein OS=Homo sapiens OX=9606 GN=TSG101 PE=1 SV=2	44087.5	47.19+-0.0	2.0+-0.0	1	531730	303494	0	0	47.	TS101_HUMAN	5.36324e-05	3.323e-05	0	0		2	0	Unique
	TTC28_HUMAN	Tetratricopeptide repeat protein 28 OS=Homo sapiens OX=9606 GN=TTC28 PE=1 SV=4	272653	97.45+-0.0	2.0+-0.0	1	136838	169626	0	0	97.	TTC28_HUMAN	1.3802e-05	1.85726e-05	0	0		2	0	Unique
	UBP24_HUMAN	Ubiquitin carboxyl-terminal hydrolase 24 OS=Homo sapiens OX=9606 GN=USP24 PE=1 SV=3	297200	48.95+-0.0	2.0+-0.0	1	505074	145569	0	0	48.	UBP24_HUMAN	5.09438e-05	1.59386e-05	0	0		2	0	Unique
	VCIP1_HUMAN	Deubiquitinating protein VCIP135 OS=Homo sapiens OX=9606 GN=VCPIP1 PE=1 SV=2	135604	295.75+-3.57	6.5+-0.5	2	2.37509e+06	1.22284e+06	0	0	295	VCIP1_HUMAN	0.000239561	0.00013389	0	0		2	0	Unique
	VGLL4_HUMAN	Transcription cofactor vestigial-like protein 4 OS=Homo sapiens OX=9606 GN=VGLL4 PE=1 SV=4	31327.4	139.1+-11.53	3.0+-0.0	2	2.87006e+06	3031354	0	0	139	VGLL4_HUMAN	0.000289486	0.000331908	0	0		2	0	Unique
	VPS18_HUMAN	Vacuolar protein sorting-associated protein 18 homolog OS=Homo sapiens OX=9606 GN=VPS18 PE=1 SV=2	111484	57.89+-0.0	2.0+-0.0	1	114739	425019	0	0	57.	VPS18_HUMAN	1.1573e-05	4.6536e-05	0	0		2	0	Unique
	VPS52_HUMAN	Vacuolar protein sorting-associated protein 52 homolog OS=Homo sapiens OX=9606 GN=VPS52 PE=1 SV=1	82511.8	70.0+-0.0	2.0+-0.0	1	0	789940	0	0	70.	VPS52_HUMAN	0	8.64918e-05	0	0		2	0	Unique
	VPS53_HUMAN	Vacuolar protein sorting-associated protein 53 homolog OS=Homo sapiens OX=9606 GN=VPS53 PE=1 SV=1	80400.3	88.73+-21.05	2.0+-0.0	2	240118	136952	0	0	88.	VPS53_HUMAN	2.42192e-05	1.49951e-05	0	0		2	0	Unique
	WAC2A_HUMAN	WASH complex subunit 2A OS=Homo sapiens OX=9606 GN=WASHC2A PE=1 SV=3	147266	172.48+-44.26	4.0+-1.0	2	602885	394262	0	0	172	WAC2A_HUMAN	6.08093e-05	4.31683e-05	0	0		2	0	Unique
	WASF1_HUMAN	Wiskott-Aldrich syndrome protein family member 1 OS=Homo sapiens OX=9606 GN=WASF1 PE=1 SV=1	61899	80.77+-0.0	2.0+-0.0	1	249842	726813	0	0	80.	WASF1_HUMAN	2.52e-05	7.95799e-05	0	0		2	0	Unique
	WBP11_HUMAN	WW domain-binding protein 11 OS=Homo sapiens OX=9606 GN=WBP11 PE=1 SV=1	69953.9	211.24+-7.82	4.0+-0.0	2	2.00129e+06	2.08203e+06	0	0	211	WBP11_HUMAN	0.000201858	0.000227965	0	0		2	0	Unique
	WDR37_HUMAN	WD repeat-containing protein 37 OS=Homo sapiens OX=9606 GN=WDR37 PE=1 SV=2	55315.8	74.91+-0.0	2.0+-0.0	1	99333.4	260952	0	0	74.	WDR37_HUMAN	1.00192e-05	2.8572e-05	0	0		2	0	Unique
	YAP1_HUMAN	Transcriptional coactivator YAP1 OS=Homo sapiens OX=9606 GN=YAP1 PE=1 SV=2	54484.5	181.27+-9.08	3.0+-0.0	2	1.77711e+06	1.68272e+06	0	0	181	YAP1_HUMAN	0.000179246	0.000184244	0	0		2	0	Unique
	Z3H7A_HUMAN	Zinc finger CCCH domain-containing protein 7A OS=Homo sapiens OX=9606 GN=ZC3H7A PE=1 SV=1	112348	174.58+-0.0	3.0+-0.0	1	504073	1.00308e+06	0	0	174	Z3H7A_HUMAN	5.08428e-05	0.000109829	0	0		2	0	Unique
	ZC3H1_HUMAN	Zinc finger C3H1 domain-containing protein OS=Homo sapiens OX=9606 GN=ZFC3H1 PE=1 SV=3	228153	217.03+-25.38	3.0+-0.0	2	777294	467356	0	0	217	ZC3H1_HUMAN	7.84009e-05	5.11715e-05	0	0		2	0	Unique
	ZC3HE_HUMAN	Zinc finger CCCH domain-containing protein 14 OS=Homo sapiens OX=9606 GN=ZC3H14 PE=1 SV=1	83792.7	411.35+-90.62	7.5+-2.5	2	3.59467e+06	4.72739e+06	0	0	411	ZC3HE_HUMAN	0.000362572	0.000517609	0	0		2	0	Unique
	ZCHC2_HUMAN	Zinc finger CCHC domain-containing protein 2 OS=Homo sapiens OX=9606 GN=ZCCHC2 PE=1 SV=6	126998	164.19+-3.68	3.0+-0.0	2	1.45869e+06	1.32624e+06	0	0	164	ZCHC2_HUMAN	0.00014713	0.000145212	0	0		2	0	Unique
	ZHX1_HUMAN	Zinc fingers and homeoboxes protein 1 OS=Homo sapiens OX=9606 GN=ZHX1 PE=1 SV=1	98493.4	98.38+-0.0	2.0+-0.0	1	1.31773e+06	260338	0	0	98.	ZHX1_HUMAN	0.000132911	2.85048e-05	0	0		2	0	Unique
	ZHX3_HUMAN	Zinc fingers and homeoboxes protein 3 OS=Homo sapiens OX=9606 GN=ZHX3 PE=1 SV=3	105447	100.47+-9.2	3.0+-0.0	2	3402518	3.1973e+06	0	0	100	ZHX3_HUMAN	0.000343191	0.000350078	0	0		2	0	Unique
	ZMYM2_HUMAN	Zinc finger MYM-type protein 2 OS=Homo sapiens OX=9606 GN=ZMYM2 PE=1 SV=1	158403	308.21+-22.07	7.5+-0.5	2	3.90547e+06	3.27509e+06	0	0	308	ZMYM2_HUMAN	0.000393921	0.000358594	0	0		2	0	Unique
	ZN451_HUMAN	E3 SUMO-protein ligase ZNF451 OS=Homo sapiens OX=9606 GN=ZNF451 PE=1 SV=2	124257	159.86+-0.0	3.0+-0.0	1	733762	179127	0	0	159	ZN451_HUMAN	7.40101e-05	1.96129e-05	0	0		2	0	Unique
	ABI1_HUMAN	Abl interactor 1 OS=Homo sapiens OX=9606 GN=ABI1 PE=1 SV=4	55160.8	482.37+-6.43	13.5+-0.5	2	5.97256e+06	7.55192e+06	1447.07	0	482	ABI1_HUMAN	0.000602416	0.000826872	1.74238e-06	0		1.99756	0.00243514	820.307
	KDM1A_HUMAN	Lysine-specific histone demethylase 1A OS=Homo sapiens OX=9606 GN=KDM1A PE=1 SV=2	93357.9	672.32+-11.91	15.5+-0.5	2	1.1137e+07	8.20211e+06	1147.17	6535.03	672	KDM1A_HUMAN	0.00112332	0.000898062	1.38128e-06	7.86004e-06		1.9909	0.00910196	218.733
	PAXI1_HUMAN	PAX-interacting protein 1 OS=Homo sapiens OX=9606 GN=PAXIP1 PE=1 SV=2	122577	313.48+-1.97	5.5+-0.5	2	2.95684e+06	2.31832e+06	0	2797.8	313	PAXI1_HUMAN	0.000298239	0.000253837	0	3.36507e-06		1.98788	0.0121168	164.061
	NU188_HUMAN	Nucleoporin NUP188 homolog OS=Homo sapiens OX=9606 GN=NUP188 PE=1 SV=1	198369	345.67+-21.07	8.0+-1.0	2	4.85034e+06	4.3539e+06	0	6954.3	345	NU188_HUMAN	0.000489224	0.000476715	0	8.36432e-06		1.98283	0.0171698	115.483
	TNIP1_HUMAN	TNFAIP3-interacting protein 1 OS=Homo sapiens OX=9606 GN=TNIP1 PE=1 SV=2	72104.7	344.42+-11.3	9.5+-0.5	2	5.17836e+06	4.25971e+06	7117.95	0	344	TNIP1_HUMAN	0.00052231	0.000466402	8.57054e-06	0		1.98281	0.0171878	115.362
	ZC3H4_HUMAN	Zinc finger CCCH domain-containing protein 4 OS=Homo sapiens OX=9606 GN=ZC3H4 PE=1 SV=3	140797	379.09+-50.61	12.0+-3.0	2	3.4586e+06	2.47719e+06	4920.09	0	379	ZC3H4_HUMAN	0.000348848	0.000271231	5.92416e-06	0		1.98107	0.0189269	104.67
	TAB2_HUMAN	TGF-beta-activated kinase 1 and MAP3K7-binding protein 2 OS=Homo sapiens OX=9606 GN=TAB2 PE=1 SV=1	77016.9	342.09+-18.05	5.5+-0.5	2	1.15919e+06	1.44408e+06	1254.68	1109.55	342	TAB2_HUMAN	0.000116921	0.000158114	1.51073e-06	1.33452e-06		1.97952	0.0204782	96.6648
	PNISR_HUMAN	Arginine/serine-rich protein PNISR OS=Homo sapiens OX=9606 GN=PNISR PE=1 SV=2	92521.1	494.28+-94.17	10.5+-2.5	2	4.84079e+06	2.38065e+06	0	6443.21	494	PNISR_HUMAN	0.000488261	0.000260661	0	7.7496e-06		1.97952	0.0204834	96.64
	MAT1_HUMAN	CDK-activating kinase assembly factor MAT1 OS=Homo sapiens OX=9606 GN=MNAT1 PE=1 SV=1	36256.5	454.9+-62.02	11.0+-1.0	2	8794794	5.51967e+06	2641.29	10403.3	454	MAT1_HUMAN	0.000887078	0.000604357	3.18031e-06	1.25127e-05		1.97917	0.020825	95.0383
	TB10B_HUMAN	TBC1 domain family member 10B OS=Homo sapiens OX=9606 GN=TBC1D10B PE=1 SV=3	87657.9	322.82+-15.09	6.5+-0.5	2	4.38931e+06	3.48139e+06	0	8101.05	322	TB10B_HUMAN	0.000442723	0.000381183	0	9.74358e-06		1.97662	0.0233757	84.5588
	TRI26_HUMAN	Tripartite motif-containing protein 26 OS=Homo sapiens OX=9606 GN=TRIM26 PE=1 SV=1	62925.4	416.95+-41.35	7.5+-0.5	2	5.59153e+06	5.22449e+06	0	11264.1	416	TRI26_HUMAN	0.000563984	0.000572037	0	1.35479e-05		1.97643	0.0235705	83.852
	BRD2_HUMAN	Bromodomain-containing protein 2 OS=Homo sapiens OX=9606 GN=BRD2 PE=1 SV=2	88291.4	177.53+-22.19	4.3+-0.94	3	9.96831e+06	3353552	14096	0	177	BRD2_HUMAN	0.00100544	0.000367186	1.69727e-05	0		1.97557	0.0244281	80.8728
	M3K7_HUMAN	Mitogen-activated protein kinase kinase kinase 7 OS=Homo sapiens OX=9606 GN=MAP3K7 PE=1 SV=1	67894.6	266.52+-41.93	6.5+-0.5	2	1.4675e+06	3.12544e+06	0	6001.99	266	M3K7_HUMAN	0.000148018	0.000342209	0	7.21892e-06		1.97098	0.0290239	67.9087
	KLF13_HUMAN	Krueppel-like factor 13 OS=Homo sapiens OX=9606 GN=KLF13 PE=1 SV=1	31616.7	179.18+-0.0	2.0+-0.0	1	2003222	3.46963e+06	9469.46	0	179	KLF13_HUMAN	0.000202053	0.000379895	1.14019e-05	0		1.96157	0.0384324	51.0394
	MILK1_HUMAN	MICAL-like protein 1 OS=Homo sapiens OX=9606 GN=MICALL1 PE=1 SV=2	94352.5	231.7+-30.68	4.0+-1.0	2	488857	402020	0	1835.79	231	MILK1_HUMAN	4.93081e-05	4.40178e-05	0	2.20801e-06		1.95378	0.0462246	42.267
	CDR2L_HUMAN	Cerebellar degeneration-related protein 2-like OS=Homo sapiens OX=9606 GN=CDR2L PE=1 SV=2	53377.2	96.42+-0.0	2.0+-0.0	1	205251	1.17058e+06	0	3033.56	96.	CDR2L_HUMAN	2.07024e-05	0.000128169	0	3.64863e-06		1.95216	0.0478447	40.8019
	MTREX_HUMAN	Exosome RNA helicase MTR4 OS=Homo sapiens OX=9606 GN=MTREX PE=1 SV=3	118756	439.55+-132.35	8.5+-2.5	2	5.62572e+06	6.59647e+06	12089.3	14778.3	439	MTREX_HUMAN	0.000567432	0.000722258	1.45564e-05	1.77747e-05		1.95109	0.0489116	39.8901
	TCF25_HUMAN	Transcription factor 25 OS=Homo sapiens OX=9606 GN=TCF25 PE=1 SV=1	77245.9	174.2+-21.14	2.0+-0.0	2	1.02235e+06	1035807	0	4524.95	174	TCF25_HUMAN	0.000103119	0.000113412	0	5.44241e-06		1.95096	0.0490366	39.7859
	KSR1_HUMAN	Kinase suppressor of Ras 1 OS=Homo sapiens OX=9606 GN=KSR1 PE=1 SV=3	103293	109.81+-9.13	3.0+-0.0	2	542636	464665	2226.51	0	109	KSR1_HUMAN	5.47324e-05	5.08769e-05	2.68088e-06	0		1.95049	0.049513	39.3934
	AMPD2_HUMAN	AMP deaminase 2 OS=Homo sapiens OX=9606 GN=AMPD2 PE=1 SV=2	101422	223.38+-13.83	4.0+-0.0	2	2.45284e+06	4225448	0	15240.1	223	AMPD2_HUMAN	0.000247403	0.000462651	0	1.83301e-05		1.94967	0.0503309	38.7371
	SHIP2_HUMAN	Phosphatidylinositol 3,4,5-trisphosphate 5-phosphatase 2 OS=Homo sapiens OX=9606 GN=INPPL1 PE=1 SV=2	139311	540.34+-96.03	12.0+-1.0	2	5.78345e+06	5.04216e+06	0	24908.7	540	SHIP2_HUMAN	0.000583342	0.000552074	0	2.9959e-05		1.94858	0.0514152	37.899
	NFAC2_HUMAN	Nuclear factor of activated T-cells, cytoplasmic 2 OS=Homo sapiens OX=9606 GN=NFATC2 PE=1 SV=2	100996	361.52+-106.0	6.0+-1.0	2	4.45968e+06	3.06124e+06	10480.8	6926.35	361	NFAC2_HUMAN	0.00044982	0.00033518	1.26196e-05	8.3307e-06		1.94801	0.051989	37.4696
	ELMO1_HUMAN	Engulfment and cell motility protein 1 OS=Homo sapiens OX=9606 GN=ELMO1 PE=1 SV=2	84516.9	87.81+-22.74	3.0+-1.0	2	794808	1.47309e+06	5434.02	0	87.	ELMO1_HUMAN	8.01674e-05	0.000161291	6.54297e-06	0		1.94723	0.0527656	36.9035
	SNX9_HUMAN	Sorting nexin-9 OS=Homo sapiens OX=9606 GN=SNX9 PE=1 SV=1	66948.8	167.88+-46.46	3.5+-0.5	2	1.81978e+06	1.67361e+06	0	8356.12	167	SNX9_HUMAN	0.00018355	0.000183246	0	1.00504e-05		1.94666	0.0533393	36.4958
	GPTC1_HUMAN	G patch domain-containing protein 1 OS=Homo sapiens OX=9606 GN=GPATCH1 PE=1 SV=1	103567	274.54+-6.42	5.5+-0.5	2	1.01168e+06	1.57855e+06	6377.13	0	274	GPTC1_HUMAN	0.000102042	0.000172838	7.67854e-06	0		1.94565	0.0543502	35.7984
	MED22_HUMAN	Mediator of RNA polymerase II transcription subunit 22 OS=Homo sapiens OX=9606 GN=MED22 PE=1 SV=2	22378.1	152.93+-29.3	3.0+-1.0	2	1.17219e+06	820998	0	4965.45	152	MED22_HUMAN	0.000118232	8.98923e-05	0	5.97222e-06		1.94421	0.05579	34.8487
	CEP55_HUMAN	Centrosomal protein of 55 kDa OS=Homo sapiens OX=9606 GN=CEP55 PE=1 SV=3	54487.3	259.76+-24.32	6.5+-0.5	2	3.09728e+06	3.3886e+06	16939.1	0	259	CEP55_HUMAN	0.000312404	0.000371023	2.03959e-05	0		1.94204	0.0579575	33.508
	CBL_HUMAN	E3 ubiquitin-protein ligase CBL OS=Homo sapiens OX=9606 GN=CBL PE=1 SV=2	100881	186.73+-140.19	6.3+-4.26	3	5.23413e+06	5.1326e+06	10758.9	16534.3	186	CBL_HUMAN	0.000527935	0.000561977	1.29545e-05	1.98868e-05		1.9415	0.0585014	33.1872
	VILI_HUMAN	Villin-1 OS=Homo sapiens OX=9606 GN=VIL1 PE=1 SV=4	93092.9	230.77+-32.22	4.5+-0.5	2	1.34213e+06	1.30708e+06	0	7072.23	230	VILI_HUMAN	0.000135373	0.000143115	0	8.50616e-06		1.94072	0.0592778	32.7395
	WIPF2_HUMAN	WAS/WASL-interacting protein family member 2 OS=Homo sapiens OX=9606 GN=WIPF2 PE=1 SV=1	46317.2	76.14+-12.14	2.5+-0.5	2	1.36649e+06	853812	4012.63	1897.83	76.	WIPF2_HUMAN	0.00013783	9.34852e-05	4.83151e-06	2.28262e-06		1.94033	0.059675	32.5149
	SIN3A_HUMAN	Paired amphipathic helix protein Sin3a OS=Homo sapiens OX=9606 GN=SIN3A PE=1 SV=2	145883	307.04+-55.57	6.0+-1.0	2	2.94728e+06	1.23364e+06	0	11067.6	307	SIN3A_HUMAN	0.000297274	0.000135073	0	1.33116e-05		1.94026	0.059739	32.4789
	HIP1R_HUMAN	Huntingtin-interacting protein 1-related protein OS=Homo sapiens OX=9606 GN=HIP1R PE=1 SV=2	119999	690.98+-18.97	11.5+-1.5	2	4.63881e+06	3.35747e+06	7806.63	13941.1	690	HIP1R_HUMAN	0.000467889	0.000367614	9.39977e-06	1.67677e-05		1.93926	0.0607366	31.9291
	FOXP4_HUMAN	Forkhead box protein P4 OS=Homo sapiens OX=9606 GN=FOXP4 PE=1 SV=1	73841.8	222.16+-28.13	4.5+-0.5	2	2.04353e+06	1.35885e+06	9287.07	0	222	FOXP4_HUMAN	0.000206119	0.000148783	1.11823e-05	0		1.93891	0.0610916	31.7377
	VP33A_HUMAN	Vacuolar protein sorting-associated protein 33A OS=Homo sapiens OX=9606 GN=VPS33A PE=1 SV=1	67967.4	123.25+-1.98	2.0+-0.0	2	1.71912e+06	1.14348e+06	0	7943.49	123	VP33A_HUMAN	0.000173397	0.000125202	0	9.55407e-06		1.93799	0.0620086	31.2536
	EP300_HUMAN	Histone acetyltransferase p300 OS=Homo sapiens OX=9606 GN=EP300 PE=1 SV=2	266898	708.35+-372.77	17.7+-9.74	3	1.21268e+07	1.40895e+07	75182.4	0	708	EP300_HUMAN	0.00122316	0.00154268	9.05253e-05	0		1.93661	0.063385	30.5532
	PPR35_HUMAN	Protein phosphatase 1 regulatory subunit 35 OS=Homo sapiens OX=9606 GN=PPP1R35 PE=1 SV=1	28106.7	242.82+-44.25	4.5+-0.5	2	2.66787e+06	1.56515e+06	0	12014.1	242	PPR35_HUMAN	0.000269092	0.00017137	0	1.44501e-05		1.93647	0.063529	30.4817
	DIAP1_HUMAN	Protein diaphanous homolog 1 OS=Homo sapiens OX=9606 GN=DIAPH1 PE=1 SV=2	141942	372.14+-294.31	6.3+-4.26	3	2.14048e+06	3.12395e+06	0	15307.3	372	DIAP1_HUMAN	0.000215897	0.000342046	0	1.84109e-05		1.93611	0.0638875	30.305
	PEG10_HUMAN	Retrotransposon-derived protein PEG10 OS=Homo sapiens OX=9606 GN=PEG10 PE=1 SV=2	80692.2	87.75+-0.0	2.0+-0.0	1	438688	359801	948.89	1420.95	87.	PEG10_HUMAN	4.42478e-05	3.93952e-05	1.14253e-06	1.70905e-06		1.93406	0.0659368	29.3321
	HPS5_HUMAN	Hermansky-Pudlak syndrome 5 protein OS=Homo sapiens OX=9606 GN=HPS5 PE=1 SV=2	129307	153.97+-0.0	4.0+-0.0	1	1.52186e+06	329398	5667.35	0	153	HPS5_HUMAN	0.000153501	3.60663e-05	6.82391e-06	0		1.93051	0.0694931	27.7798
	YLPM1_HUMAN	YLP motif-containing protein 1 OS=Homo sapiens OX=9606 GN=YLPM1 PE=1 SV=4	241723	326.36+-22.0	7.5+-0.5	2	1.46989e+06	2.34944e+06	5600.97	6599.22	326	YLPM1_HUMAN	0.000148259	0.000257244	6.74399e-06	7.93725e-06		1.93012	0.0698799	27.6205
	SET1B_HUMAN	Histone-lysine N-methyltransferase SETD1B OS=Homo sapiens OX=9606 GN=SETD1B PE=1 SV=3	213867	389.74+-0.0	6.0+-0.0	1	155534	1.23452e+06	0	4645.71	389	SET1B_HUMAN	1.56878e-05	0.00013517	0	5.58765e-06		1.92857	0.0714326	26.9984
	HMGX4_HUMAN	HMG domain-containing protein 4 OS=Homo sapiens OX=9606 GN=HMGXB4 PE=1 SV=2	66013.3	149.21+-37.01	3.0+-0.0	2	1.70236e+06	2.033e+06	0	12283.5	149	HMGX4_HUMAN	0.000171707	0.000222596	0	1.47741e-05		1.92777	0.0722313	26.6888
	DAB2P_HUMAN	Disabled homolog 2-interacting protein OS=Homo sapiens OX=9606 GN=DAB2IP PE=1 SV=2	132513	195.86+-32.36	3.0+-1.0	2	1.0401e+06	1.44486e+06	8655.18	0	195	DAB2P_HUMAN	0.000104909	0.0001582	1.04215e-05	0		1.9238	0.0761998	25.2468
	XPC_HUMAN	DNA repair protein complementing XP-C cells OS=Homo sapiens OX=9606 GN=XPC PE=1 SV=4	106743	318.71+-17.99	6.5+-0.5	2	3.53285e+06	3803226	0	25469.5	318	XPC_HUMAN	0.000356337	0.000416421	0	3.06335e-05		1.92374	0.0762606	25.2259
	CTBP1_HUMAN	C-terminal-binding protein 1 OS=Homo sapiens OX=9606 GN=CTBP1 PE=1 SV=2	47961.7	282.86+-0.0	7.0+-0.0	1	0	1.49174e+07	54388	0	282	CTBP1_HUMAN	0	0.00163333	6.54872e-05	0		1.9229	0.0770973	24.9412
	ASH1L_HUMAN	Histone-lysine N-methyltransferase ASH1L OS=Homo sapiens OX=9606 GN=ASH1L PE=1 SV=2	336174	276.36+-14.58	5.5+-1.5	2	1.00343e+06	869483	0	6577.76	276	ASH1L_HUMAN	0.00010121	9.5201e-05	0	7.91143e-06		1.92256	0.0774408	24.8262
	SPF27_HUMAN	Pre-mRNA-splicing factor SPF27 OS=Homo sapiens OX=9606 GN=BCAS2 PE=1 SV=1	26229	311.44+-24.17	8.5+-0.5	2	7.72618e+06	6.53391e+06	41261.4	9161.27	311	SPF27_HUMAN	0.000779293	0.000715408	4.96819e-05	1.10188e-05		1.92195	0.0780514	24.6241
	INT14_HUMAN	Integrator complex subunit 14 OS=Homo sapiens OX=9606 GN=INTS14 PE=1 SV=2	58004.2	134.62+-80.25	2.8+-0.98	4	2.5069e+06	3.15118e+06	10683.8	9846.02	134	INT14_HUMAN	0.000252856	0.000345028	1.28641e-05	1.18424e-05		1.92063	0.0793668	24.1994
	OSBP1_HUMAN	Oxysterol-binding protein 1 OS=Homo sapiens OX=9606 GN=OSBP PE=1 SV=1	90219.9	55.2+-6.56	2.0+-0.0	2	1.64627e+06	1119467	10728.5	0	55.	OSBP1_HUMAN	0.000166049	0.000122572	1.29179e-05	0		1.91432	0.0856799	22.3427
	RCOR1_HUMAN	REST corepressor 1 OS=Homo sapiens OX=9606 GN=RCOR1 PE=1 SV=2	53408.7	427.1+-82.41	7.0+-1.0	2	3.19442e+06	2325964	0	21510.3	427	RCOR1_HUMAN	0.000322201	0.000254673	0	2.58716e-05		1.91415	0.0858456	22.2976
	MEF2D_HUMAN	Myocyte-specific enhancer factor 2D OS=Homo sapiens OX=9606 GN=MEF2D PE=1 SV=1	56131.4	269.17+-143.75	5.7+-2.87	3	4.96529e+06	4.23768e+06	31786.9	4366.96	269	MEF2D_HUMAN	0.000500819	0.00046399	3.82738e-05	5.25238e-06		1.91367	0.0863327	22.1662
	ZC3HD_HUMAN	Zinc finger CCCH domain-containing protein 13 OS=Homo sapiens OX=9606 GN=ZC3H13 PE=1 SV=1	197203	260.8+-35.29	6.0+-1.0	2	865209	1.71938e+06	10495.8	0	260	ZC3HD_HUMAN	8.72684e-05	0.000188257	1.26377e-05	0		1.91229	0.0877123	21.8018
	CE170_HUMAN	Centrosomal protein of 170 kDa OS=Homo sapiens OX=9606 GN=CEP170 PE=1 SV=1	175586	224.53+-143.0	4.5+-2.5	3	2.2188e+06	2.17009e+06	1463.92	16642.1	224	CE170_HUMAN	0.000223797	0.000237606	1.76267e-06	2.00164e-05		1.90985	0.0901484	21.1856
	MD1L1_HUMAN	Mitotic spindle assembly checkpoint protein MAD1 OS=Homo sapiens OX=9606 GN=MAD1L1 PE=1 SV=2	83300.7	101.27+-0.0	2.0+-0.0	1	0	730870	0	3170.62	101	MD1L1_HUMAN	0	8.00241e-05	0	3.81348e-06		1.90903	0.090973	20.9845
	NAB1_HUMAN	NGFI-A-binding protein 1 OS=Homo sapiens OX=9606 GN=NAB1 PE=1 SV=2	54823.7	224.13+-41.75	5.5+-0.5	2	1.45035e+06	1.59907e+06	0	12932.9	224	NAB1_HUMAN	0.000146288	0.000175085	0	1.55552e-05		1.90766	0.0923353	20.6602
	HAUS5_HUMAN	HAUS augmin-like complex subunit 5 OS=Homo sapiens OX=9606 GN=HAUS5 PE=1 SV=2	72265.2	109.44+-17.62	2.0+-0.0	2	500032	430142	3939.62	0	109	HAUS5_HUMAN	5.04352e-05	4.70969e-05	4.7436e-06	0		1.90724	0.092761	20.5608
	WDR75_HUMAN	WD repeat-containing protein 75 OS=Homo sapiens OX=9606 GN=WDR75 PE=1 SV=1	95921	88.81+-13.61	3.5+-0.5	2	572716	556602	0	4817.73	88.	WDR75_HUMAN	5.77664e-05	6.09432e-05	0	5.79455e-06		1.90692	0.0930821	20.4864
	PRP8_HUMAN	Pre-mRNA-processing-splicing factor 8 OS=Homo sapiens OX=9606 GN=PRPF8 PE=1 SV=2	274738	377.72+-197.85	7.7+-3.3	3	5.96811e+06	5.3744e+06	29855.6	18589.9	377	PRP8_HUMAN	0.000601967	0.000588452	3.59484e-05	2.23591e-05		1.90661	0.0933871	20.4162
	IRF2_HUMAN	Interferon regulatory factor 2 OS=Homo sapiens OX=9606 GN=IRF2 PE=1 SV=2	39500.9	83.04+-19.97	3.0+-0.0	2	3.31132e+06	2.26339e+06	0	24506.7	83.	IRF2_HUMAN	0.000333993	0.000247822	0	2.94755e-05		1.90356	0.0964369	19.7389
	REQU_HUMAN	Zinc finger protein ubi-d4 OS=Homo sapiens OX=9606 GN=DPF2 PE=1 SV=2	45267.6	422.8+-19.97	8.5+-0.5	2	5147590	6.23247e+06	19090.2	31943.3	422	REQU_HUMAN	0.000519206	0.000682403	2.2986e-05	3.84199e-05		1.90276	0.0972371	19.5683
	E2AK4_HUMAN	eIF-2-alpha kinase GCN2 OS=Homo sapiens OX=9606 GN=EIF2AK4 PE=1 SV=3	188276	59.58+-0.0	2.0+-0.0	1	313526	785986	0	5001.87	59.	E2AK4_HUMAN	3.16234e-05	8.60588e-05	0	6.01603e-06		1.90273	0.0972693	19.5615
	SMRD3_HUMAN	SWI/SNF-related matrix-associated actin-dependent regulator of chromatin subfamily D member 3 OS=Homo sapiens OX=9606 GN=SMARCD3 PE=1 SV=1	55209.5	232.01+-93.96	4.4+-3.01	4	478703	4.10476e+06	10450.2	11414.9	232	SMRD3_HUMAN	4.82839e-05	0.000449436	1.25829e-05	1.37294e-05		1.89958	0.100422	18.9159
	CDKA1_HUMAN	Cyclin-dependent kinase 2-associated protein 1 OS=Homo sapiens OX=9606 GN=CDK2AP1 PE=1 SV=1	12414.3	115.63+-36.33	5.5+-2.06	3	1.33615e+07	6.96752e+06	1535.16	91309.5	115	CDKA1_HUMAN	0.00134769	0.000762884	1.84845e-06	0.000109823		1.8995	0.100503	18.8999
	GAPD1_HUMAN	GTPase-activating protein and VPS9 domain-containing protein 1 OS=Homo sapiens OX=9606 GN=GAPVD1 PE=1 SV=2	166359	304.27+-66.91	5.0+-1.0	2	5130988	5065824	0	47652.5	304	GAPD1_HUMAN	0.000517532	0.000554665	0	5.73142e-05		1.89851	0.101485	18.7073
	VPS16_HUMAN	Vacuolar protein sorting-associated protein 16 homolog OS=Homo sapiens OX=9606 GN=VPS16 PE=1 SV=2	95660	550.44+-22.34	9.0+-1.0	2	4.50498e+06	4.80064e+06	33724.2	9856.8	550	VPS16_HUMAN	0.000454391	0.000525629	4.06064e-05	1.18553e-05		1.89838	0.101623	18.6807
	PKHG3_HUMAN	Pleckstrin homology domain-containing family G member 3 OS=Homo sapiens OX=9606 GN=PLEKHG3 PE=1 SV=1	135242	170.32+-17.49	3.0+-0.0	2	1.72816e+06	919091	6840.57	5414.49	170	PKHG3_HUMAN	0.000174309	0.000100633	8.23656e-06	6.51231e-06		1.89818	0.101825	18.6416
	SUGP1_HUMAN	SURP and G-patch domain-containing protein 1 OS=Homo sapiens OX=9606 GN=SUGP1 PE=1 SV=2	72539.5	256.93+-21.5	6.5+-0.5	2	2.04019e+06	1.38049e+06	7490.24	8779.11	256	SUGP1_HUMAN	0.000205782	0.000151152	9.01881e-06	1.05591e-05		1.896	0.103996	18.2314
	CWC22_HUMAN	Pre-mRNA-splicing factor CWC22 homolog OS=Homo sapiens OX=9606 GN=CWC22 PE=1 SV=3	105972	106.82+-16.84	2.7+-0.47	3	1.36218e+06	1.054e+06	11654.1	0	106	CWC22_HUMAN	0.000137395	0.000115404	1.40323e-05	0		1.89482	0.105178	18.0154
	WAPL_HUMAN	Wings apart-like protein homolog OS=Homo sapiens OX=9606 GN=WAPL PE=1 SV=1	134516	181.82+-93.12	3.8+-2.23	4	6.25544e+06	4.97971e+06	12032.2	42272.9	181	WAPL_HUMAN	0.000630948	0.000545236	1.44877e-05	5.0844e-05		1.89475	0.105245	18.0033
	SLX4I_HUMAN	Protein SLX4IP OS=Homo sapiens OX=9606 GN=SLX4IP PE=1 SV=1	46093.7	114.11+-27.41	2.7+-0.94	3	200795	2865447	10188.1	5283.22	114	SLX4I_HUMAN	2.0253e-05	0.000313742	1.22673e-05	6.35442e-06		1.89438	0.10562	17.9358
	AP3S1_HUMAN	AP-3 complex subunit sigma-1 OS=Homo sapiens OX=9606 GN=AP3S1 PE=1 SV=1	21946.2	95.47+-7.8	2.5+-0.5	2	813873	438764	0	6111.74	95.	AP3S1_HUMAN	8.20905e-05	4.80409e-05	0	7.35093e-06		1.89306	0.106936	17.7027
	BCL7A_HUMAN	B-cell CLL/lymphoma 7 protein family member A OS=Homo sapiens OX=9606 GN=BCL7A PE=1 SV=1	22852.8	89.4+-0.0	2.0+-0.0	1	285237	3.71186e+06	0	20489.6	89.	BCL7A_HUMAN	2.87701e-05	0.000406417	0	2.46439e-05		1.89281	0.107187	17.659
	NUP93_HUMAN	Nuclear pore complex protein Nup93 OS=Homo sapiens OX=9606 GN=NUP93 PE=1 SV=2	93942.8	99.02+-54.35	2.5+-0.5	2	851211	725549	7857.82	0	99.	NUP93_HUMAN	8.58565e-05	7.94415e-05	9.4614e-06	0		1.89172	0.108279	17.4708
	PAPOG_HUMAN	Poly(A) polymerase gamma OS=Homo sapiens OX=9606 GN=PAPOLG PE=1 SV=2	83093.3	245.54+-15.0	5.0+-1.0	2	1.51749e+06	1.5327e+06	0	15306.6	245	PAPOG_HUMAN	0.000153061	0.000167818	0	1.84101e-05		1.89148	0.108522	17.4295
	EMAL4_HUMAN	Echinoderm microtubule-associated protein-like 4 OS=Homo sapiens OX=9606 GN=EML4 PE=1 SV=3	109932	330.75+-32.41	7.0+-1.0	2	3.89759e+06	2.63688e+06	0	32834.7	330	EMAL4_HUMAN	0.000393126	0.000288716	0	3.94921e-05		1.8905	0.109497	17.2653
	MRE11_HUMAN	Double-strand break repair protein MRE11 OS=Homo sapiens OX=9606 GN=MRE11 PE=1 SV=3	80885.4	483.0+-93.88	11.0+-3.0	2	3.21841e+06	6.87088e+06	33148.1	18964.1	483	MRE11_HUMAN	0.000324622	0.000752303	3.99128e-05	2.28092e-05		1.88993	0.110073	17.1698
	CC85B_HUMAN	Coiled-coil domain-containing protein 85B OS=Homo sapiens OX=9606 GN=CCDC85B PE=1 SV=2	22419.3	83.59+-0.0	2.0+-0.0	1	2115729	3516290	28948.8	0	83.	CC85B_HUMAN	0.000213401	0.000385004	3.48565e-05	0		1.88991	0.110086	17.1677
	FBRS_HUMAN	Probable fibrosin-1 OS=Homo sapiens OX=9606 GN=FBRS PE=1 SV=3	48529.2	130.25+-47.95	3.0+-0.0	2	4920151	4.33757e+06	23585.9	23510.8	130	FBRS_HUMAN	0.000496266	0.000474927	2.83992e-05	2.82778e-05		1.88972	0.11028	17.1356
	DOCK5_HUMAN	Dedicator of cytokinesis protein 5 OS=Homo sapiens OX=9606 GN=DOCK5 PE=1 SV=3	216198	67.44+-11.47	2.0+-0.0	2	744984	762011	5936.05	1831.12	67.	DOCK5_HUMAN	7.5142e-05	8.34338e-05	7.14745e-06	2.20239e-06		1.88864	0.111357	16.9603
	TADA3_HUMAN	Transcriptional adapter 3 OS=Homo sapiens OX=9606 GN=TADA3 PE=1 SV=1	49100.3	250.53+-25.7	5.0+-0.0	2	3.38476e+06	3.41858e+06	35560.1	0	250	TADA3_HUMAN	0.0003414	0.000374306	4.2817e-05	0		1.8871	0.112896	16.7155
	KANL1_HUMAN	KAT8 regulatory NSL complex subunit 1 OS=Homo sapiens OX=9606 GN=KANSL1 PE=1 SV=2	121749	344.08+-101.17	5.0+-1.0	2	1466483	1.73202e+06	0	16954.6	344	KANL1_HUMAN	0.000147915	0.000189642	0	2.03922e-05		1.88606	0.113939	16.5532
	NSD2_HUMAN	Histone-lysine N-methyltransferase NSD2 OS=Homo sapiens OX=9606 GN=NSD2 PE=1 SV=1	156209	124.98+-13.92	2.5+-0.5	2	1.86642e+06	146557	5063.11	5608.41	124	NSD2_HUMAN	0.000188254	1.60467e-05	6.09636e-06	6.74554e-06		1.88172	0.118281	15.9089
	FOXO1_HUMAN	Forkhead box protein O1 OS=Homo sapiens OX=9606 GN=FOXO1 PE=1 SV=2	70016.5	192.36+-36.93	2.5+-0.5	2	801096	324854	6244.44	0	192	FOXO1_HUMAN	8.08017e-05	3.55688e-05	7.51877e-06	0		1.87862	0.121379	15.4773
	HAUS6_HUMAN	HAUS augmin-like complex subunit 6 OS=Homo sapiens OX=9606 GN=HAUS6 PE=1 SV=2	109636	126.92+-26.11	2.5+-0.5	2	571561	482201	0	5939.81	126	HAUS6_HUMAN	5.76499e-05	5.27969e-05	0	7.14414e-06		1.87849	0.121508	15.4598
	C19L1_HUMAN	CWF19-like protein 1 OS=Homo sapiens OX=9606 GN=CWF19L1 PE=1 SV=2	61322.1	95.07+-11.57	2.0+-0.0	2	1352478	1243255	14817.2	0	95.	C19L1_HUMAN	0.000136416	0.000136126	1.7841e-05	0		1.87712	0.122879	15.2762
	COBL1_HUMAN	Cordon-bleu protein-like 1 OS=Homo sapiens OX=9606 GN=COBLL1 PE=1 SV=3	124362	281.6+-24.77	4.0+-0.0	2	1.30904e+06	835503	0	12183.1	281	COBL1_HUMAN	0.000132035	9.14805e-05	0	1.46533e-05		1.87695	0.12305	15.2536
	SQSTM_HUMAN	Sequestosome-1 OS=Homo sapiens OX=9606 GN=SQSTM1 PE=1 SV=1	48455.2	118.87+-0.0	2.0+-0.0	1	836450	184365	5722.02	0	118	SQSTM_HUMAN	8.43676e-05	2.01865e-05	6.88974e-06	0		1.87635	0.123645	15.1753
	FL2D_HUMAN	Pre-mRNA-splicing regulator WTAP OS=Homo sapiens OX=9606 GN=WTAP PE=1 SV=2	44387.8	220.52+-90.75	4.7+-2.05	3	4.98208e+06	3.63808e+06	33889.3	15588.8	220	FL2D_HUMAN	0.000502512	0.000398339	4.08053e-05	1.87495e-05		1.87598	0.12402	15.1264
	ZC11A_HUMAN	Zinc finger CCCH domain-containing protein 11A OS=Homo sapiens OX=9606 GN=ZC3H11A PE=1 SV=3	89931.3	163.42+-0.0	2.0+-0.0	1	812921	16128.9	4620.43	0	163	ZC11A_HUMAN	8.19944e-05	1.76598e-06	5.56334e-06	0		1.87543	0.124566	15.0558
	I2BP1_HUMAN	Interferon regulatory factor 2-binding protein 1 OS=Homo sapiens OX=9606 GN=IRF2BP1 PE=1 SV=1	62561.3	305.33+-76.31	7.0+-1.0	2	6415006	3.68396e+06	40547.3	17652.7	305	I2BP1_HUMAN	0.000647043	0.000403363	4.8822e-05	2.12319e-05		1.87496	0.125045	14.9943
	CRTC1_HUMAN	CREB-regulated transcription coactivator 1 OS=Homo sapiens OX=9606 GN=CRTC1 PE=1 SV=2	67372.2	211.05+-13.39	4.5+-0.5	2	2.67892e+06	1.2861e+06	3752.2	19693.7	211	CRTC1_HUMAN	0.000270207	0.000140817	4.51793e-06	2.36867e-05		1.87157	0.128428	14.5729
	OPA1_HUMAN	Dynamin-like 120 kDa protein, mitochondrial OS=Homo sapiens OX=9606 GN=OPA1 PE=1 SV=3	112131	381.41+-217.05	7.3+-3.86	3	4.52901e+06	2.96755e+06	45083	0	381	OPA1_HUMAN	0.000456814	0.000324922	5.42833e-05	0		1.87014	0.129861	14.401
	GMIP_HUMAN	GEM-interacting protein OS=Homo sapiens OX=9606 GN=GMIP PE=1 SV=2	107586	121.82+-0.0	2.0+-0.0	1	278218	234807	1559.6	1707.29	121	GMIP_HUMAN	2.80622e-05	2.57094e-05	1.87788e-06	2.05345e-06		1.86374	0.136261	13.6777
	GA2L3_HUMAN	GAS2-like protein 3 OS=Homo sapiens OX=9606 GN=GAS2L3 PE=1 SV=1	76022.5	146.76+-0.0	3.0+-0.0	1	143900	1.10925e+06	8296.11	0	146	GA2L3_HUMAN	1.45144e-05	0.000121453	9.98914e-06	0		1.86312	0.136878	13.6116
	DPOE1_HUMAN	DNA polymerase epsilon catalytic subunit A OS=Homo sapiens OX=9606 GN=POLE PE=1 SV=5	264031	350.03+-333.78	7.4+-6.68	4	7.21622e+06	4.37213e+06	29856.6	44076.5	350	DPOE1_HUMAN	0.000727857	0.000478711	3.59496e-05	5.30133e-05		1.86266	0.137338	13.5626
	ATAD5_HUMAN	ATPase family AAA domain-containing protein 5 OS=Homo sapiens OX=9606 GN=ATAD5 PE=1 SV=4	209494	161.92+-8.21	3.5+-0.5	2	466531	756161	8153.47	0	161	ATAD5_HUMAN	4.70562e-05	8.27932e-05	9.81739e-06	0		1.85942	0.140583	13.2265
	ASPP1_HUMAN	Apoptosis-stimulating of p53 protein 1 OS=Homo sapiens OX=9606 GN=PPP1R13B PE=1 SV=3	120062	616.46+-472.61	10.8+-7.82	3	5.96552e+06	7102895	24417.3	62789.5	616	ASPP1_HUMAN	0.000601705	0.000777707	2.94002e-05	7.55204e-05		1.85863	0.141371	13.1472
	GBF1_HUMAN	Golgi-specific brefeldin A-resistance guanine nucleotide exchange factor 1 OS=Homo sapiens OX=9606 GN=GBF1 PE=1 SV=2	208367	130.16+-23.53	2.0+-0.0	3	839078	1.3206e+06	3880.13	10937.1	130	GBF1_HUMAN	8.46327e-05	0.000144594	4.67197e-06	1.31547e-05		1.85569	0.144314	12.8586
	EP400_HUMAN	E1A-binding protein p400 OS=Homo sapiens OX=9606 GN=EP400 PE=1 SV=4	344702	292.88+-74.8	6.3+-2.49	3	2.15218e+06	2.42763e+06	21487.3	10116.5	292	EP400_HUMAN	0.000217078	0.000265805	2.58723e-05	1.21676e-05		1.85395	0.146048	12.6941
	AFF1_HUMAN	AF4/FMR2 family member 1 OS=Homo sapiens OX=9606 GN=AFF1 PE=1 SV=1	132139	148.31+-36.94	2.5+-0.5	2	628871	997717	7347.2	3984.55	148	AFF1_HUMAN	6.34304e-05	0.000109242	8.84658e-06	4.79244e-06		1.85359	0.146411	12.6602
	RED_HUMAN	Protein Red OS=Homo sapiens OX=9606 GN=IK PE=1 SV=3	65675.8	364.37+-311.58	7.8+-5.76	3	1.54558e+07	1.73707e+07	81854.3	148259	364	RED_HUMAN	0.00155893	0.00190195	9.85587e-05	0.00017832		1.85185	0.148152	12.4996
	DNMBP_HUMAN	Dynamin-binding protein OS=Homo sapiens OX=9606 GN=DNMBP PE=1 SV=1	178719	428.62+-261.33	10.2+-5.11	4	1.09936e+07	1.0837e+07	72264.3	80456.7	428	DNMBP_HUMAN	0.00110886	0.00118656	8.70117e-05	9.67697e-05		1.85174	0.148259	12.4899
	VAC14_HUMAN	Protein VAC14 homolog OS=Homo sapiens OX=9606 GN=VAC14 PE=1 SV=1	88943.1	136.0+-20.78	2.5+-0.5	2	1.58687e+06	2.37643e+06	14099	14058.1	136	VAC14_HUMAN	0.000160058	0.000260199	1.69763e-05	1.69084e-05		1.85077	0.149225	12.4026
	SMG9_HUMAN	Protein SMG9 OS=Homo sapiens OX=9606 GN=SMG9 PE=1 SV=1	57842.2	193.73+-3.92	3.5+-0.5	2	1.61432e+06	1.0308e+06	0	18483	193	SMG9_HUMAN	0.000162827	0.000112864	0	2.22305e-05		1.85076	0.149238	12.4014
	RFX5_HUMAN	DNA-binding protein RFX5 OS=Homo sapiens OX=9606 GN=RFX5 PE=1 SV=1	65682	233.33+-151.8	5.0+-3.79	4	2.78867e+06	1.53553e+06	16263.5	13930.8	233	RFX5_HUMAN	0.000281276	0.000168128	1.95825e-05	1.67553e-05		1.85038	0.149618	12.3674
	BUB1B_HUMAN	Mitotic checkpoint serine/threonine-protein kinase BUB1 beta OS=Homo sapiens OX=9606 GN=BUB1B PE=1 SV=3	120781	236.66+-0.0	3.0+-0.0	1	885095	0	6007.24	0	236	BUB1B_HUMAN	8.92742e-05	0	7.23317e-06	0		1.8501	0.149899	12.3423
	NCOR2_HUMAN	Nuclear receptor corepressor 2 OS=Homo sapiens OX=9606 GN=NCOR2 PE=1 SV=3	274230	279.32+-134.41	6.0+-2.83	3	4.04134e+06	4.95879e+06	44324.3	20101.7	279	NCOR2_HUMAN	0.000407625	0.000542946	5.33697e-05	2.41774e-05		1.84915	0.150853	12.258
	CDYL_HUMAN	Chromodomain Y-like protein OS=Homo sapiens OX=9606 GN=CDYL PE=1 SV=2	66953.2	191.06+-86.8	4.0+-2.83	2	4.18658e+06	864226	14958.6	20451.5	191	CDYL_HUMAN	0.000422275	9.46254e-05	1.80112e-05	2.45981e-05		1.84769	0.152309	12.1312
	YETS2_HUMAN	YEATS domain-containing protein 2 OS=Homo sapiens OX=9606 GN=YEATS2 PE=1 SV=2	151601	235.95+-138.63	5.8+-2.77	3	4.09325e+06	5.05924e+06	15146	51523.4	235	YETS2_HUMAN	0.000412862	0.000553944	1.8237e-05	6.197e-05		1.84679	0.153211	12.0539
	EXOC7_HUMAN	Exocyst complex component 7 OS=Homo sapiens OX=9606 GN=EXOC7 PE=1 SV=3	83729.2	184.34+-89.44	3.8+-2.05	3	2.41334e+06	1.48175e+06	0	28266.5	184	EXOC7_HUMAN	0.000243419	0.000162239	0	3.39977e-05		1.84534	0.154656	11.9319
	CCDC6_HUMAN	Coiled-coil domain-containing protein 6 OS=Homo sapiens OX=9606 GN=CCDC6 PE=1 SV=2	53428.9	527.38+-526.59	10.2+-10.05	4	1.68599e+07	1.65665e+07	128329	125346	527	CCDC6_HUMAN	0.00170055	0.00181389	0.000154518	0.000150761		1.84016	0.159843	11.5122
	TRI65_HUMAN	Tripartite motif-containing protein 65 OS=Homo sapiens OX=9606 GN=TRIM65 PE=1 SV=3	58742.4	158.82+-9.45	2.0+-0.0	2	1.97022e+06	2089651	0	31142	158	TRI65_HUMAN	0.000198724	0.000228799	0	3.74562e-05		1.83889	0.161109	11.4139
	NUF2_HUMAN	Kinetochore protein Nuf2 OS=Homo sapiens OX=9606 GN=NUF2 PE=1 SV=2	54611.4	151.74+-59.93	4.7+-1.89	3	1.79231e+06	1.51894e+06	12052.4	13513.5	151	NUF2_HUMAN	0.00018078	0.000166311	1.45119e-05	1.62534e-05		1.83716	0.162842	11.2819
	AFF4_HUMAN	AF4/FMR2 family member 4 OS=Homo sapiens OX=9606 GN=AFF4 PE=1 SV=1	127781	410.3+-274.33	8.4+-5.39	4	1.08093e+07	1.14869e+07	72366.8	101584	410	AFF4_HUMAN	0.00109027	0.00125772	8.7135e-05	0.000122181		1.8363	0.1637	11.2174
	MCRS1_HUMAN	Microspherule protein 1 OS=Homo sapiens OX=9606 GN=MCRS1 PE=1 SV=1	51999.3	136.33+-15.89	3.5+-0.5	2	1385882	1424436	7767.82	14388.6	136	MCRS1_HUMAN	0.000139786	0.000155964	9.35304e-06	1.73059e-05		1.83463	0.165374	11.0938
	RPP38_HUMAN	Ribonuclease P protein subunit p38 OS=Homo sapiens OX=9606 GN=RPP38 PE=1 SV=2	32042.7	70.62+-0.0	2.0+-0.0	1	276572	328470	0	4787.24	70.	RPP38_HUMAN	2.78961e-05	3.59647e-05	0	5.75788e-06		1.83459	0.165412	11.091
	ELOA1_HUMAN	Elongin-A OS=Homo sapiens OX=9606 GN=ELOA PE=1 SV=2	90309.4	581.38+-360.56	12.8+-8.89	4	1.48699e+07	16830716	119703	132562	581	ELOA1_HUMAN	0.00149984	0.00184282	0.000144132	0.000159439		1.83349	0.166512	11.0111
	ENY2_HUMAN	Transcription and mRNA export factor ENY2 OS=Homo sapiens OX=9606 GN=ENY2 PE=1 SV=1	11635.4	221.08+-0.59	6.0+-0.0	2	3.06776e+06	3.01967e+06	18855	29809.2	221	ENY2_HUMAN	0.000309426	0.000330629	2.27028e-05	3.58532e-05		1.83236	0.167636	10.9306
	EHMT2_HUMAN	Histone-lysine N-methyltransferase EHMT2 OS=Homo sapiens OX=9606 GN=EHMT2 PE=1 SV=3	134682	262.64+-58.16	5.0+-1.0	2	2.16637e+06	2.52462e+06	12622	25404.3	262	EHMT2_HUMAN	0.000218509	0.000276425	1.51978e-05	3.05552e-05		1.83076	0.16924	10.8175
	UBAP2_HUMAN	Ubiquitin-associated protein 2 OS=Homo sapiens OX=9606 GN=UBAP2 PE=1 SV=1	117614	352.01+-108.77	7.6+-3.32	4	1.64677e+07	1.49087e+07	114173	140281	352	UBAP2_HUMAN	0.001661	0.00163238	0.000137472	0.000168724		1.82987	0.170129	10.7558
	TULP3_HUMAN	Tubby-related protein 3 OS=Homo sapiens OX=9606 GN=TULP3 PE=1 SV=2	50010	175.0+-51.89	3.5+-0.5	2	850068	973453	14857.5	0	175	TULP3_HUMAN	8.57412e-05	0.000106585	1.78895e-05	0		1.8298	0.170201	10.7508
	CCD50_HUMAN	Coiled-coil domain-containing protein 50 OS=Homo sapiens OX=9606 GN=CCDC50 PE=1 SV=1	35914	373.07+-207.37	9.2+-6.05	4	7.30548e+06	2.05137e+07	128570	105842	373	CCD50_HUMAN	0.000736859	0.00224608	0.000154808	0.000127302		1.82719	0.172806	10.5737
	ASHWN_HUMAN	Ashwin OS=Homo sapiens OX=9606 GN=C2orf49 PE=1 SV=1	25899.6	267.32+-175.3	10.8+-9.68	4	1.49755e+07	1.20577e+07	101884	121066	267	ASHWN_HUMAN	0.00151049	0.00132022	0.000122676	0.000145613		1.82685	0.173146	10.5509
	HPS6_HUMAN	Hermansky-Pudlak syndrome 6 protein OS=Homo sapiens OX=9606 GN=HPS6 PE=1 SV=1	83721.1	211.07+-74.31	4.3+-0.94	3	5.50601e+06	5.2929e+06	90898.2	0	211	HPS6_HUMAN	0.000555358	0.000579528	0.000109448	0		1.82409	0.175914	10.3692
	MAML1_HUMAN	Mastermind-like protein 1 OS=Homo sapiens OX=9606 GN=MAML1 PE=1 SV=3	108443	332.2+-24.0	5.5+-0.5	2	2.46107e+06	2.85246e+06	0	45139.6	332	MAML1_HUMAN	0.000248233	0.00031232	0	5.42919e-05		1.8234	0.176603	10.3248
	MTMRC_HUMAN	Myotubularin-related protein 12 OS=Homo sapiens OX=9606 GN=MTMR12 PE=1 SV=2	87176.2	189.19+-43.75	7.0+-0.0	2	2.51945e+06	1.52776e+06	34685.5	0	189	MTMRC_HUMAN	0.000254122	0.000167276	4.17639e-05	0		1.81966	0.180343	10.09
	COR2A_HUMAN	Coronin-2A OS=Homo sapiens OX=9606 GN=CORO2A PE=1 SV=2	60238.5	345.69+-19.3	7.0+-0.0	2	6.82209e+06	7.30097e+06	62465.9	61509.2	345	COR2A_HUMAN	0.000688103	0.000799394	7.52136e-05	7.39805e-05		1.81769	0.182312	9.97021
	BANP_HUMAN	Protein BANP OS=Homo sapiens OX=9606 GN=BANP PE=1 SV=3	57143.4	119.92+-27.91	2.0+-0.0	3	1829430	422458	10910.2	8414.23	119	BANP_HUMAN	0.000184524	4.62556e-05	1.31367e-05	1.01203e-05		1.8169	0.1831	9.92302
	TFDP1_HUMAN	Transcription factor Dp-1 OS=Homo sapiens OX=9606 GN=TFDP1 PE=1 SV=1	45327.6	136.26+-15.77	5.0+-1.0	2	1.07375e+06	1.07959e+06	19079.9	0	136	TFDP1_HUMAN	0.000108303	0.000118206	2.29737e-05	0		1.81583	0.18417	9.85951
	RAD18_HUMAN	E3 ubiquitin-protein ligase RAD18 OS=Homo sapiens OX=9606 GN=RAD18 PE=1 SV=2	57042.6	247.24+-165.22	6.0+-3.69	4	6.3872e+06	5.00966e+06	53591.3	46937	247	RAD18_HUMAN	0.000644238	0.000548515	6.4528e-05	5.64537e-05		1.81582	0.18418	9.85896
	ATRIP_HUMAN	ATR-interacting protein OS=Homo sapiens OX=9606 GN=ATRIP PE=1 SV=1	87095	197.54+-25.83	4.7+-1.25	3	4.09319e+06	3.55216e+06	49859.1	18149.2	197	ATRIP_HUMAN	0.000412856	0.000388931	6.00341e-05	2.18291e-05		1.81472	0.185284	9.79423
	CARM1_HUMAN	Histone-arginine methyltransferase CARM1 OS=Homo sapiens OX=9606 GN=CARM1 PE=1 SV=3	66381.6	219.51+-15.55	4.5+-0.5	2	3.2844e+06	3400672	24312.2	35418.4	219	CARM1_HUMAN	0.000331278	0.000372345	2.92736e-05	4.25997e-05		1.81464	0.185361	9.78976
	SSRP1_HUMAN	FACT complex subunit SSRP1 OS=Homo sapiens OX=9606 GN=SSRP1 PE=1 SV=1	81366.6	251.17+-200.6	4.4+-2.24	4	3.11462e+06	5.32605e+06	34153.1	42615.4	251	SSRP1_HUMAN	0.000314153	0.000583158	4.11229e-05	5.12558e-05		1.81332	0.186682	9.71339
	TRIP6_HUMAN	Thyroid receptor-interacting protein 6 OS=Homo sapiens OX=9606 GN=TRIP6 PE=1 SV=3	51738	299.65+-163.61	7.8+-5.49	4	8.27048e+06	1.34947e+07	117642	82824.2	299	TRIP6_HUMAN	0.000834193	0.00147755	0.000141649	9.96172e-05		1.81099	0.189005	9.58171
	NR2C2_HUMAN	Nuclear receptor subfamily 2 group C member 2 OS=Homo sapiens OX=9606 GN=NR2C2 PE=1 SV=1	66228.4	222.38+-48.08	2.5+-0.5	2	1.8779e+06	1397142	13208	16489.3	222	NR2C2_HUMAN	0.000189412	0.000152975	1.59035e-05	1.98326e-05		1.81098	0.189018	9.581
	LRCH1_HUMAN	Leucine-rich repeat and calponin homology domain-containing protein 1 OS=Homo sapiens OX=9606 GN=LRCH1 PE=1 SV=3	81850.4	188.24+-0.0	3.0+-0.0	1	334589	1565645	17804.4	0	188	LRCH1_HUMAN	3.3748e-05	0.000171425	2.14378e-05	0		1.8108	0.189204	9.5706
	TARB1_HUMAN	Probable methyltransferase TARBP1 OS=Homo sapiens OX=9606 GN=TARBP1 PE=1 SV=1	183840	174.18+-13.48	3.5+-0.5	2	845268	999286	16961.4	0	174	TARB1_HUMAN	8.52571e-05	0.000109413	2.04228e-05	0		1.8101	0.189897	9.532
	INT3_HUMAN	Integrator complex subunit 3 OS=Homo sapiens OX=9606 GN=INTS3 PE=1 SV=1	119533	639.57+-365.07	12.0+-6.23	4	1.92211e+07	1.39922e+07	211928	96507.2	639	INT3_HUMAN	0.00193871	0.00153203	0.000255177	0.000116075		1.80674	0.19326	9.34876
	SKI_HUMAN	Ski oncogene OS=Homo sapiens OX=9606 GN=SKI PE=1 SV=1	81209.3	115.27+-67.44	2.8+-0.83	3	639301	1.56473e+06	0	21084.4	115	SKI_HUMAN	6.44824e-05	0.000171325	0	2.53594e-05		1.8058	0.194201	9.29861
	SAFB2_HUMAN	Scaffold attachment factor B2 OS=Homo sapiens OX=9606 GN=SAFB2 PE=1 SV=1	107921	397.25+-277.67	8.6+-6.89	4	1.53181e+07	2.06322e+07	260789	81947.2	397	SAFB2_HUMAN	0.00154504	0.00225905	0.00031401	9.85625e-05		1.80431	0.195686	9.22044
	ARI1A_HUMAN	AT-rich interactive domain-containing protein 1A OS=Homo sapiens OX=9606 GN=ARID1A PE=1 SV=3	242805	666.27+-432.87	12.8+-8.42	4	9.5468e+06	6.71339e+06	47657.2	107432	666	ARI1A_HUMAN	0.000962928	0.000735059	5.73828e-05	0.000129214		1.80198	0.198025	9.09974
	TEAD1_HUMAN	Transcriptional enhancer factor TEF-1 OS=Homo sapiens OX=9606 GN=TEAD1 PE=1 SV=2	48314.1	96.46+-9.37	2.0+-0.0	2	1.08331e+06	1.35936e+06	23765.2	0	96.	TEAD1_HUMAN	0.000109267	0.000148839	2.86151e-05	0		1.8004	0.199602	9.01992
	MED19_HUMAN	Mediator of RNA polymerase II transcription subunit 19 OS=Homo sapiens OX=9606 GN=MED19 PE=1 SV=2	26427.6	102.66+-28.59	3.5+-0.87	3	1664910	2.51967e+06	25235	15809.5	102	MED19_HUMAN	0.000167929	0.000275882	3.03848e-05	1.9015e-05		1.79968	0.200319	8.98409
	WWP2_HUMAN	NEDD4-like E3 ubiquitin-protein ligase WWP2 OS=Homo sapiens OX=9606 GN=WWP2 PE=1 SV=2	99420.3	178.13+-11.42	4.5+-0.5	2	2293971	2.35178e+06	0	45311.6	178	WWP2_HUMAN	0.000231379	0.0002575	0	5.44987e-05		1.79941	0.200592	8.97046
	KS6A3_HUMAN	Ribosomal protein S6 kinase alpha-3 OS=Homo sapiens OX=9606 GN=RPS6KA3 PE=1 SV=1	84025.1	85.12+-11.97	2.0+-0.0	3	491310	400091	8680.32	0	85.	KS6A3_HUMAN	4.95555e-05	4.38066e-05	1.04518e-05	0		1.79864	0.201356	8.93267
	TRI11_HUMAN	E3 ubiquitin-protein ligase TRIM11 OS=Homo sapiens OX=9606 GN=TRIM11 PE=1 SV=2	53766.9	250.44+-0.0	3.0+-0.0	1	2372797	553971	0	28547.3	250	TRI11_HUMAN	0.00023933	6.06551e-05	0	3.43355e-05		1.7946	0.205405	8.73688
	NC2A_HUMAN	Dr1-associated corepressor OS=Homo sapiens OX=9606 GN=DRAP1 PE=1 SV=3	22450	63.25+-9.84	2.0+-0.0	2	151972	114880	0	2679.74	63.	NC2A_HUMAN	1.53285e-05	1.25784e-05	0	3.22307e-06		1.79293	0.207072	8.65847
	NYAP2_HUMAN	Neuronal tyrosine-phosphorylated phosphoinositide-3-kinase adapter 2 OS=Homo sapiens OX=9606 GN=NYAP2 PE=1 SV=3	71074.2	159.78+-12.32	2.0+-0.0	2	251486	747721	2861.76	7546.94	159	NYAP2_HUMAN	2.53659e-05	8.18691e-05	3.44577e-06	9.07712e-06		1.79086	0.209137	8.56312
	TB182_HUMAN	182 kDa tankyrase-1-binding protein OS=Homo sapiens OX=9606 GN=TNKS1BP1 PE=1 SV=4	182711	332.65+-260.59	6.4+-4.59	4	4.74032e+06	3.04895e+06	18718	60334	332	TB182_HUMAN	0.000478127	0.000333835	2.25378e-05	7.2567e-05		1.7903	0.209698	8.53754
	RPB3_HUMAN	DNA-directed RNA polymerase II subunit RPB3 OS=Homo sapiens OX=9606 GN=POLR2C PE=1 SV=2	31763.9	209.62+-54.8	3.5+-0.5	2	1.61131e+06	859110	7943.73	17196	209	RPB3_HUMAN	0.000162523	9.40653e-05	9.56485e-06	2.06825e-05		1.7891	0.210904	8.483
	TFE2_HUMAN	Transcription factor E2-alpha OS=Homo sapiens OX=9606 GN=TCF3 PE=1 SV=1	67673.1	208.09+-42.04	6.0+-0.0	2	2.53966e+06	2.64672e+06	53550	0	208	TFE2_HUMAN	0.00025616	0.000289793	6.44783e-05	0		1.78875	0.211255	8.46725
	TYY1_HUMAN	Transcriptional repressor protein YY1 OS=Homo sapiens OX=9606 GN=YY1 PE=1 SV=2	45140.9	418.51+-59.2	24.4+-9.89	4	1.49114e+08	1.27998e+08	1.33313e+06	1.51957e+06	418	TYY1_HUMAN	0.0150402	0.0140147	0.00160518	0.00182767		1.78867	0.211332	8.46378
	BRD4_HUMAN	Bromodomain-containing protein 4 OS=Homo sapiens OX=9606 GN=BRD4 PE=1 SV=2	152580	304.92+-215.03	8.4+-7.06	4	1.17693e+07	1.21809e+07	137456	110888	304	BRD4_HUMAN	0.0011871	0.0013337	0.000165508	0.000133371		1.788	0.211995	8.43418
	PARD3_HUMAN	Partitioning defective 3 homolog OS=Homo sapiens OX=9606 GN=PARD3 PE=1 SV=2	151844	384.65+-206.34	6.4+-3.5	4	7.38701e+06	8.41953e+06	66777.2	98493.8	384	PARD3_HUMAN	0.000745083	0.000921867	8.04048e-05	0.000118464		1.78683	0.21317	8.38216
	ERCC5_HUMAN	DNA repair protein complementing XP-G cells OS=Homo sapiens OX=9606 GN=ERCC5 PE=1 SV=3	133768	418.08+-283.81	6.4+-3.83	4	4.34737e+06	5.09314e+06	61440.7	37355.4	418	ERCC5_HUMAN	0.000438493	0.000557655	7.39792e-05	4.49294e-05		1.78672	0.213278	8.37742
	TBCD4_HUMAN	TBC1 domain family member 4 OS=Homo sapiens OX=9606 GN=TBC1D4 PE=1 SV=2	148068	394.53+-115.53	6.6+-3.07	4	1.3298e+07	8.76886e+06	145912	84989.2	394	TBCD4_HUMAN	0.00134129	0.000960116	0.000175689	0.000102221		1.78451	0.215491	8.28112
	TBCD5_HUMAN	TBC1 domain family member 5 OS=Homo sapiens OX=9606 GN=TBC1D5 PE=1 SV=1	89518.8	199.81+-2.71	4.0+-1.0	2	526197	849489	0	14781.1	199	TBCD5_HUMAN	5.30743e-05	9.30118e-05	0	1.77781e-05		1.78301	0.216985	8.21722
	RSBNL_HUMAN	Lysine-specific demethylase RSBN1L OS=Homo sapiens OX=9606 GN=RSBN1L PE=1 SV=2	95380.7	274.37+-23.79	6.0+-0.0	2	1.87822e+06	2.42893e+06	0	46284.8	274	RSBNL_HUMAN	0.000189445	0.000265947	0	5.56693e-05		1.78214	0.217858	8.18031
	TF2H3_HUMAN	General transcription factor IIH subunit 3 OS=Homo sapiens OX=9606 GN=GTF2H3 PE=1 SV=2	34982.8	93.46+-0.0	2.0+-0.0	1	394997	407766	8676.64	0	93.	TF2H3_HUMAN	3.9841e-05	4.46469e-05	1.04473e-05	0		1.77991	0.220094	8.08703
	PUR8_HUMAN	Adenylosuccinate lyase OS=Homo sapiens OX=9606 GN=ADSL PE=1 SV=2	55595.2	150.95+-8.08	4.0+-0.0	2	1.1895e+06	1649166	0	30917.5	150	PUR8_HUMAN	0.000119978	0.00018057	0	3.71862e-05		1.77979	0.22021	8.08223
	NEDD1_HUMAN	Protein NEDD1 OS=Homo sapiens OX=9606 GN=NEDD1 PE=1 SV=1	72548.4	300.14+-199.14	4.4+-2.58	4	3.46942e+06	2.90558e+06	44585.4	24952	300	NEDD1_HUMAN	0.000349939	0.000318136	5.36841e-05	3.00111e-05		1.77734	0.222662	7.98224
	FOXP1_HUMAN	Forkhead box protein P1 OS=Homo sapiens OX=9606 GN=FOXP1 PE=1 SV=1	75725.8	164.75+-62.03	4.7+-1.25	3	3.42532e+06	3.12297e+06	59346.6	12435	164	FOXP1_HUMAN	0.000345492	0.000341939	7.14577e-05	1.49562e-05		1.77666	0.223337	7.95509
	RENT2_HUMAN	Regulator of nonsense transcripts 2 OS=Homo sapiens OX=9606 GN=UPF2 PE=1 SV=1	148972	238.65+-160.95	6.4+-3.83	4	1.31109e+07	5.31768e+06	132446	66997.5	238	RENT2_HUMAN	0.00132242	0.000582241	0.000159475	8.05816e-05		1.77614	0.223859	7.93421
	MALT1_HUMAN	Mucosa-associated lymphoid tissue lymphoma translocation protein 1 OS=Homo sapiens OX=9606 GN=MALT1 PE=1 SV=1	93752.7	75.17+-0.0	2.0+-0.0	1	561273	504497	5203.93	6593.72	75.	MALT1_HUMAN	5.66122e-05	5.52382e-05	6.26592e-06	7.93063e-06		1.77474	0.225258	7.8787
	PUM1_HUMAN	Pumilio homolog 1 OS=Homo sapiens OX=9606 GN=PUM1 PE=1 SV=3	127079	346.3+-5.49	5.5+-0.5	2	5312952	4.13412e+06	60463.1	44664	346	PUM1_HUMAN	0.000535885	0.000452651	7.28021e-05	5.37198e-05		1.77307	0.226933	7.81316
	RAPH1_HUMAN	Ras-associated and pleckstrin homology domains-containing protein 1 OS=Homo sapiens OX=9606 GN=RAPH1 PE=1 SV=3	135799	424.62+-254.54	10.8+-7.25	4	1.30742e+07	1.53865e+07	203948	119534	424	RAPH1_HUMAN	0.00131871	0.00168469	0.000245569	0.00014377		1.77049	0.229513	7.71411
	WASF2_HUMAN	Wiskott-Aldrich syndrome protein family member 2 OS=Homo sapiens OX=9606 GN=WASF2 PE=1 SV=3	54478.5	162.75+-109.06	3.5+-1.66	3	4762325	5187171	45131	68051.1	162	WASF2_HUMAN	0.000480347	0.000567951	5.43411e-05	8.18488e-05		1.77004	0.229956	7.69733
	P3C2B_HUMAN	Phosphatidylinositol 4-phosphate 3-kinase C2 domain-containing subunit beta OS=Homo sapiens OX=9606 GN=PIK3C2B PE=1 SV=2	186817	338.58+-172.49	6.7+-2.87	3	2.69515e+06	2619228	46252	14351.5	338	P3C2B_HUMAN	0.000271843	0.000286783	5.56908e-05	1.72614e-05		1.76898	0.231015	7.65743
	SHAN2_HUMAN	SH3 and multiple ankyrin repeat domains protein 2 OS=Homo sapiens OX=9606 GN=SHANK2 PE=1 SV=3	159237	618.97+-395.13	12.0+-6.57	4	1.26146e+07	1.20914e+07	147688	135574	618	SHAN2_HUMAN	0.00127236	0.0013239	0.000177828	0.000163063		1.76788	0.232123	7.61611
	OCRL_HUMAN	Inositol polyphosphate 5-phosphatase OCRL OS=Homo sapiens OX=9606 GN=OCRL PE=1 SV=3	105392	131.68+-2.67	3.0+-0.0	2	805112	743087	10307.3	7486.82	131	OCRL_HUMAN	8.12068e-05	8.13617e-05	1.24108e-05	9.00481e-06		1.7672	0.232798	7.59113
	BTBD7_HUMAN	BTB/POZ domain-containing protein 7 OS=Homo sapiens OX=9606 GN=BTBD7 PE=1 SV=3	127429	221.23+-106.18	4.0+-1.63	3	1.68921e+06	1.67301e+06	19702.3	19346.8	221	BTBD7_HUMAN	0.00017038	0.000183181	2.37231e-05	2.32695e-05		1.76536	0.234638	7.52377
	IKZF1_HUMAN	DNA-binding protein Ikaros OS=Homo sapiens OX=9606 GN=IKZF1 PE=1 SV=1	58631.8	206.27+-114.49	4.0+-2.45	4	6.98733e+06	7.07641e+06	45320.5	118530	206	IKZF1_HUMAN	0.00070477	0.000774807	5.45692e-05	0.000142563		1.76486	0.235142	7.5055
	TRAF4_HUMAN	TNF receptor-associated factor 4 OS=Homo sapiens OX=9606 GN=TRAF4 PE=1 SV=1	55218.1	49.42+-8.46	2.0+-0.0	2	509606	442313	11113.4	0	49.	TRAF4_HUMAN	5.14009e-05	4.84295e-05	1.33814e-05	0		1.7636	0.236395	7.46041
	ATX2_HUMAN	Ataxin-2 OS=Homo sapiens OX=9606 GN=ATXN2 PE=1 SV=2	140823	249.03+-148.62	4.0+-2.1	4	2.04876e+06	3.00242e+06	10002	49977.2	249	ATX2_HUMAN	0.000206646	0.00032874	1.20431e-05	6.01103e-05		1.76247	0.237527	7.4201
	LIMD1_HUMAN	LIM domain-containing protein 1 OS=Homo sapiens OX=9606 GN=LIMD1 PE=1 SV=1	73854.6	321.22+-194.02	5.4+-3.56	4	7.27507e+06	4.4654e+06	88347.6	48571.8	321	LIMD1_HUMAN	0.000733792	0.000488924	0.000106377	5.842e-05		1.76246	0.237543	7.41953
	SF01_HUMAN	Splicing factor 1 OS=Homo sapiens OX=9606 GN=SF1 PE=1 SV=4	68514	335.38+-231.78	9.2+-7.36	4	8.11676e+06	7.74129e+06	122612	64727.9	335	SF01_HUMAN	0.000818688	0.000847606	0.000147634	7.78519e-05		1.76162	0.238385	7.38981
	SF3B1_HUMAN	Splicing factor 3B subunit 1 OS=Homo sapiens OX=9606 GN=SF3B1 PE=1 SV=3	146479	288.81+-246.0	6.0+-4.6	4	3.09879e+06	4.63729e+06	41289.6	51327.8	288	SF3B1_HUMAN	0.000312556	0.000507744	4.97158e-05	6.17348e-05		1.76077	0.239228	7.36021
	TRI56_HUMAN	E3 ubiquitin-protein ligase TRIM56 OS=Homo sapiens OX=9606 GN=TRIM56 PE=1 SV=3	83147.1	328.14+-8.6	6.0+-0.0	2	3.14637e+06	2.79102e+06	29764	40803.1	328	TRI56_HUMAN	0.000317356	0.000305593	3.58381e-05	4.90761e-05		1.76008	0.239917	7.33621
	CRBG2_HUMAN	Beta/gamma crystallin domain-containing protein 2 OS=Homo sapiens OX=9606 GN=CRYBG2 PE=2 SV=2	179001	401.76+-143.32	8.2+-3.06	4	6.18144e+06	4.62631e+06	49437.9	80215.2	401	CRBG2_HUMAN	0.000623485	0.000506542	5.95269e-05	9.64793e-05		1.75738	0.242616	7.24348
	C10_HUMAN	Protein C10 OS=Homo sapiens OX=9606 GN=C12orf57 PE=1 SV=1	13283.7	147.72+-9.72	2.5+-0.5	2	687318	1.04225e+06	21045.6	0	147	C10_HUMAN	6.93256e-05	0.000114117	2.53405e-05	0		1.75726	0.242744	7.23913
	SUZ12_HUMAN	Polycomb protein SUZ12 OS=Homo sapiens OX=9606 GN=SUZ12 PE=1 SV=3	83743.9	278.84+-180.09	4.8+-3.49	4	4.85552e+06	3.28508e+06	55381	43324	278	SUZ12_HUMAN	0.000489747	0.000359688	6.66829e-05	5.21082e-05		1.75462	0.245379	7.15067
	MKRN2_HUMAN	Probable E3 ubiquitin-protein ligase makorin-2 OS=Homo sapiens OX=9606 GN=MKRN2 PE=1 SV=2	48277.9	118.73+-34.94	3.0+-1.22	3	4642455	3.9766e+06	29795.2	75896.4	118	MKRN2_HUMAN	0.000468256	0.000435404	3.58756e-05	9.12848e-05		1.75328	0.246717	7.10646
	TF2H1_HUMAN	General transcription factor IIH subunit 1 OS=Homo sapiens OX=9606 GN=GTF2H1 PE=1 SV=1	62334.8	221.57+-68.88	4.2+-1.33	4	3.80302e+06	3.24858e+06	7786.52	80251.5	221	TF2H1_HUMAN	0.000383588	0.000355692	9.37555e-06	9.65229e-05		1.74941	0.250594	6.98103
	CATIN_HUMAN	Cactin OS=Homo sapiens OX=9606 GN=CACTIN PE=1 SV=3	88761.6	126.07+-39.62	2.5+-0.87	3	4.48801e+06	2615303	56320.4	31864.5	126	CATIN_HUMAN	0.000452679	0.000286354	6.7814e-05	3.83252e-05		1.74883	0.251166	6.96286
	RREB1_HUMAN	Ras-responsive element-binding protein 1 OS=Homo sapiens OX=9606 GN=RREB1 PE=1 SV=3	184157	269.0+-165.2	5.6+-2.94	4	2.75617e+06	3.70645e+06	18966	64098.1	269	RREB1_HUMAN	0.000277998	0.000405825	2.28365e-05	7.70944e-05		1.74499	0.255006	6.84296
	ATF2_HUMAN	Cyclic AMP-dependent transcription factor ATF-2 OS=Homo sapiens OX=9606 GN=ATF2 PE=1 SV=4	54788.9	133.65+-13.34	2.0+-0.0	2	326725	358843	0	8790.83	133	ATF2_HUMAN	3.29547e-05	3.92903e-05	0	1.05732e-05		1.74466	0.255335	6.83283
	CRTC3_HUMAN	CREB-regulated transcription coactivator 3 OS=Homo sapiens OX=9606 GN=CRTC3 PE=1 SV=2	67089.3	186.25+-82.25	6.5+-1.5	2	3.3692e+06	2237885	36414.2	34774.6	186	CRTC3_HUMAN	0.000339831	0.000245029	4.38454e-05	4.18253e-05		1.74447	0.255531	6.82684
	SIPA1_HUMAN	Signal-induced proliferation-associated protein 1 OS=Homo sapiens OX=9606 GN=SIPA1 PE=1 SV=1	112821	293.31+-125.93	6.3+-2.49	3	2.70304e+06	4.99584e+06	74662.4	25157.3	293	SIPA1_HUMAN	0.00027264	0.000547002	8.98991e-05	3.02581e-05		1.74429	0.255708	6.82141
	MED12_HUMAN	Mediator of RNA polymerase II transcription subunit 12 OS=Homo sapiens OX=9606 GN=MED12 PE=1 SV=4	245665	279.66+-195.0	5.6+-4.13	4	1.78764e+06	2.946e+06	39828.8	21844.3	279	MED12_HUMAN	0.000180309	0.000322562	4.79568e-05	2.62733e-05		1.74275	0.257252	6.77448
	T2FB_HUMAN	General transcription factor IIF subunit 2 OS=Homo sapiens OX=9606 GN=GTF2F2 PE=1 SV=2	28419.9	346.14+-175.6	6.0+-2.94	3	7.3592e+06	6.81143e+06	134034	49296.9	346	T2FB_HUMAN	0.000742278	0.000745794	0.000161387	5.92921e-05		1.74171	0.258293	6.74315
	LIN7C_HUMAN	Protein lin-7 homolog C OS=Homo sapiens OX=9606 GN=LIN7C PE=1 SV=1	21934.5	118.85+-0.0	2.0+-0.0	1	1148405	220291	0	17286.3	118	LIN7C_HUMAN	0.000115833	2.412e-05	0	2.07911e-05		1.74131	0.258687	6.73136
	HSPB8_HUMAN	Heat shock protein beta-8 OS=Homo sapiens OX=9606 GN=HSPB8 PE=1 SV=1	21761.7	95.83+-6.33	2.0+-0.0	2	2.66134e+06	2.45242e+06	0	66397.8	95.	HSPB8_HUMAN	0.000268434	0.000268519	0	7.98603e-05		1.74106	0.258945	6.72365
	LIPA1_HUMAN	Liprin-alpha-1 OS=Homo sapiens OX=9606 GN=PPFIA1 PE=1 SV=1	136265	1080.23+-601.62	22.0+-14.09	4	3.18041e+07	2.54188e+07	431081	310195	108	LIPA1_HUMAN	0.00320788	0.00278314	0.000519054	0.000373088		1.74078	0.259224	6.71532
	TOX4_HUMAN	TOX high mobility group box family member 4 OS=Homo sapiens OX=9606 GN=TOX4 PE=1 SV=1	66552.2	422.49+-192.55	7.8+-3.97	4	9.8297e+06	7.6575e+06	104112	122967	422	TOX4_HUMAN	0.000991462	0.000838431	0.000125358	0.000147899		1.74015	0.259855	6.6966
	BPTF_HUMAN	Nucleosome-remodeling factor subunit BPTF OS=Homo sapiens OX=9606 GN=BPTF PE=1 SV=3	340791	309.49+-175.0	5.8+-3.87	4	4.38112e+06	3.43874e+06	44577.9	57462.4	309	BPTF_HUMAN	0.000441897	0.000376514	5.36752e-05	6.91132e-05		1.73908	0.260919	6.66521
	NOM1_HUMAN	Nucleolar MIF4G domain-containing protein 1 OS=Homo sapiens OX=9606 GN=NOM1 PE=1 SV=1	96767.8	113.46+-29.09	2.0+-0.0	2	391252	510849	11946.2	0	113	NOM1_HUMAN	3.94632e-05	5.59337e-05	1.43841e-05	0		1.73795	0.262051	6.63209
	CDC5L_HUMAN	Cell division cycle 5-like protein OS=Homo sapiens OX=9606 GN=CDC5L PE=1 SV=2	92421.8	726.66+-454.53	13.0+-7.46	4	1.32668e+07	1.05578e+07	157068	158161	726	CDC5L_HUMAN	0.00133814	0.00115599	0.000189122	0.000190229		1.73596	0.264036	6.57471
	BHE40_HUMAN	Class E basic helix-loop-helix protein 40 OS=Homo sapiens OX=9606 GN=BHLHE40 PE=1 SV=1	45937.4	116.03+-2.91	2.0+-0.0	2	795708	812292	21541.6	0	116	BHE40_HUMAN	8.02582e-05	8.89391e-05	2.59377e-05	0		1.73416	0.265844	6.52322
	PHC2_HUMAN	Polyhomeotic-like protein 2 OS=Homo sapiens OX=9606 GN=PHC2 PE=1 SV=1	91341	119.81+-0.0	2.0+-0.0	1	265485	826302	0	15545.1	119	PHC2_HUMAN	2.67778e-05	9.0473e-05	0	1.86969e-05		1.72494	0.27506	6.27114
	HAUS8_HUMAN	HAUS augmin-like complex subunit 8 OS=Homo sapiens OX=9606 GN=HAUS8 PE=1 SV=3	44944	259.16+-1.22	5.0+-0.0	2	2.92357e+06	1.60953e+06	29399	33674.5	259	HAUS8_HUMAN	0.000294883	0.00017623	3.53985e-05	4.05022e-05		1.72249	0.277509	6.20696
	TYK2_HUMAN	Non-receptor tyrosine-protein kinase TYK2 OS=Homo sapiens OX=9606 GN=TYK2 PE=1 SV=3	135389	59.27+-0.34	2.0+-0.0	2	503833	772455	0	18228.3	59.	TYK2_HUMAN	5.08186e-05	8.45773e-05	0	2.19241e-05		1.72128	0.27872	6.17565
	NCOR1_HUMAN	Nuclear receptor corepressor 1 OS=Homo sapiens OX=9606 GN=NCOR1 PE=1 SV=2	270957	668.98+-413.61	14.0+-9.01	4	1.12127e+07	1.3919e+07	124144	235608	668	NCOR1_HUMAN	0.00113096	0.00152401	0.000149479	0.000283378		1.71964	0.280364	6.13358
	DYN2_HUMAN	Dynamin-2 OS=Homo sapiens OX=9606 GN=DNM2 PE=1 SV=2	98345.3	114.5+-41.37	3.0+-1.1	4	1.57471e+06	2.28969e+06	30560.2	25000.2	114	DYN2_HUMAN	0.000158831	0.000250702	3.67967e-05	3.00691e-05		1.71929	0.280714	6.1247
	RAD21_HUMAN	Double-strand-break repair protein rad21 homolog OS=Homo sapiens OX=9606 GN=RAD21 PE=1 SV=2	71929.8	292.58+-206.07	6.3+-4.26	3	3.59458e+06	3.48809e+06	31273.4	71079.5	292	RAD21_HUMAN	0.000362563	0.000381917	3.76555e-05	8.54912e-05		1.71613	0.28387	6.04547
	SCML2_HUMAN	Sex comb on midleg-like protein 2 OS=Homo sapiens OX=9606 GN=SCML2 PE=1 SV=1	78063.2	261.36+-89.91	5.8+-3.43	4	5.99841e+06	5.743e+06	77048.6	93087.5	261	SCML2_HUMAN	0.000605023	0.00062881	9.27723e-05	0.000111961		1.71536	0.284636	6.02652
	CYFP2_HUMAN	Cytoplasmic FMR1-interacting protein 2 OS=Homo sapiens OX=9606 GN=CYFIP2 PE=1 SV=2	150298	379.7+-73.3	8.8+-2.93	4	5.43285e+07	4.03328e+07	636352	740664	379	CYFP2_HUMAN	0.00547979	0.00441611	0.000766216	0.000890837		1.71314	0.286862	5.97198
	KIN17_HUMAN	DNA/RNA-binding protein KIN17 OS=Homo sapiens OX=9606 GN=KIN PE=1 SV=2	45744.6	144.82+-8.6	3.5+-0.5	3	2.01877e+06	2.74683e+06	12226	58977.8	144	KIN17_HUMAN	0.000203621	0.000300755	1.47211e-05	7.09359e-05		1.70965	0.290347	5.88832
	BD1L1_HUMAN	Biorientation of chromosomes in cell division protein 1-like 1 OS=Homo sapiens OX=9606 GN=BOD1L1 PE=1 SV=2	332433	391.17+-211.58	7.8+-5.67	4	4.8495e+06	5.85631e+06	72269.1	87733.4	391	BD1L1_HUMAN	0.000489139	0.000641217	8.70175e-05	0.000105522		1.70891	0.291088	5.87078
	RMC1_HUMAN	Regulator of MON1-CCZ1 complex OS=Homo sapiens OX=9606 GN=RMC1 PE=1 SV=2	75667.9	141.96+-32.0	2.5+-0.5	2	677588	534117	11237.2	6724.94	141	RMC1_HUMAN	6.83442e-05	5.84813e-05	1.35305e-05	8.08846e-06		1.70873	0.291273	5.86641
	RIPK2_HUMAN	Receptor-interacting serine/threonine-protein kinase 2 OS=Homo sapiens OX=9606 GN=RIPK2 PE=1 SV=2	61726.4	342.59+-121.21	6.0+-2.16	3	4.02046e+06	3.9777e+06	88812.8	31185	342	RIPK2_HUMAN	0.000405519	0.000435525	0.000106937	3.75079e-05		1.70686	0.293144	5.82258
	TRM61_HUMAN	tRNA (adenine(58)-N(1))-methyltransferase catalytic subunit TRMT61A OS=Homo sapiens OX=9606 GN=TRMT61A PE=1 SV=1	31704	99.76+-0.0	3.0+-0.0	1	156706	476114	9690.93	0	99.	TRM61_HUMAN	1.5806e-05	5.21304e-05	1.16686e-05	0		1.70684	0.293163	5.82215
	ENASE_HUMAN	Cytosolic endo-beta-N-acetylglucosaminidase OS=Homo sapiens OX=9606 GN=ENGASE PE=1 SV=1	85130.7	109.53+-22.01	2.0+-0.0	2	326522	711244	15812.5	0	109	ENASE_HUMAN	3.29343e-05	7.78752e-05	1.90394e-05	0		1.70675	0.293255	5.82001
	OTU7B_HUMAN	OTU domain-containing protein 7B OS=Homo sapiens OX=9606 GN=OTUD7B PE=1 SV=1	93152.3	290.65+-111.35	6.0+-2.1	4	2.70366e+06	3.54327e+06	45160.6	49826.6	290	OTU7B_HUMAN	0.000272702	0.000387958	5.43767e-05	5.99292e-05		1.705	0.294996	5.77975
	KRIT1_HUMAN	Krev interaction trapped protein 1 OS=Homo sapiens OX=9606 GN=KRIT1 PE=1 SV=2	84978.7	141.82+-13.52	2.5+-0.5	2	1283382	1.4758e+06	11584.6	30359.3	141	KRIT1_HUMAN	0.000129447	0.000161587	1.39487e-05	3.65149e-05		1.70446	0.295543	5.76721
	DCP1A_HUMAN	mRNA-decapping enzyme 1A OS=Homo sapiens OX=9606 GN=DCP1A PE=1 SV=3	63410.3	76.58+-25.54	2.5+-0.5	2	538274	747800	0	19767.9	76.	DCP1A_HUMAN	5.42924e-05	8.18777e-05	0	2.3776e-05		1.7027	0.2973	5.72721
	REN3A_HUMAN	Regulator of nonsense transcripts 3A OS=Homo sapiens OX=9606 GN=UPF3A PE=1 SV=1	55062.2	74.55+-13.9	2.0+-0.0	4	2576409	2.25714e+06	41325.5	32616.4	74.	REN3A_HUMAN	0.000259867	0.000247138	4.9759e-05	3.92295e-05		1.70138	0.298623	5.69742
	SRBS2_HUMAN	Sorbin and SH3 domain-containing protein 2 OS=Homo sapiens OX=9606 GN=SORBS2 PE=1 SV=3	125171	119.32+-52.24	3.0+-1.0	3	2.42057e+06	2.79843e+06	3228.71	77339.6	119	SRBS2_HUMAN	0.000244149	0.000306404	3.88761e-06	9.30206e-05		1.70065	0.299348	5.68118
	M4K2_HUMAN	Mitogen-activated protein kinase kinase kinase kinase 2 OS=Homo sapiens OX=9606 GN=MAP4K2 PE=1 SV=2	92467.5	145.31+-69.48	2.8+-0.83	3	1.15656e+06	1.22526e+06	14141.9	22557.7	145	M4K2_HUMAN	0.000116655	0.000134156	1.70279e-05	2.71314e-05		1.70058	0.299415	5.67969
	RBM15_HUMAN	RNA-binding protein 15 OS=Homo sapiens OX=9606 GN=RBM15 PE=1 SV=2	107352	770.49+-260.66	18.2+-6.43	4	2.5178e+07	2.52601e+07	312259	465995	770	RBM15_HUMAN	0.00253955	0.00276577	0.000375984	0.000560478		1.69994	0.300062	5.66528
	GUAA_HUMAN	GMP synthase [glutamine-hydrolyzing] OS=Homo sapiens OX=9606 GN=GMPS PE=1 SV=1	77408.2	177.57+-27.48	3.5+-1.5	2	811452	2.55572e+06	41050.2	12093.9	177	GUAA_HUMAN	8.18462e-05	0.00027983	4.94275e-05	1.45459e-05		1.69941	0.300592	5.65354
	TCRG1_HUMAN	Transcription elongation regulator 1 OS=Homo sapiens OX=9606 GN=TCERG1 PE=1 SV=2	124051	106.11+-0.0	2.0+-0.0	1	191154	2116005	6747.55	30250.9	106	TCRG1_HUMAN	1.92805e-05	0.000231685	8.12456e-06	3.63844e-05		1.69873	0.301272	5.63853
	POGZ_HUMAN	Pogo transposable element with ZNF domain OS=Homo sapiens OX=9606 GN=POGZ PE=1 SV=2	157355	441.41+-176.06	11.4+-5.0	4	1.03687e+07	4.59096e+06	144374	85740.8	441	POGZ_HUMAN	0.00104583	0.000502672	0.000173837	0.000103125		1.69656	0.303443	5.59102
	TFAP4_HUMAN	Transcription factor AP-4 OS=Homo sapiens OX=9606 GN=TFAP4 PE=1 SV=2	38815.8	228.8+-143.31	4.2+-2.4	4	4.59656e+06	3.80681e+06	59511.8	71581.3	228	TFAP4_HUMAN	0.000463627	0.000416813	7.16566e-05	8.60947e-05		1.6961	0.303896	5.58119
	CND2_HUMAN	Condensin complex subunit 2 OS=Homo sapiens OX=9606 GN=NCAPH PE=1 SV=3	83309.6	169.79+-59.13	3.6+-1.5	4	6.65796e+06	5147032	121030	63892.4	169	CND2_HUMAN	0.000671548	0.000563557	0.000145729	7.68469e-05		1.69462	0.305383	5.54915
	DNLI3_HUMAN	DNA ligase 3 OS=Homo sapiens OX=9606 GN=LIG3 PE=1 SV=2	114317	975.9+-493.5	29.8+-23.56	4	4.01334e+07	3.03578e+07	578493	525414	975	DNLI3_HUMAN	0.00404801	0.00332392	0.000696549	0.000631945		1.69461	0.305386	5.54909
	PRP4_HUMAN	U4/U6 small nuclear ribonucleoprotein Prp4 OS=Homo sapiens OX=9606 GN=PRPF4 PE=1 SV=2	59096.7	288.84+-136.88	5.2+-2.4	4	3.95058e+06	4.76368e+06	43745.9	94179	288	PRP4_HUMAN	0.000398471	0.000521583	5.26733e-05	0.000113274		1.69439	0.305612	5.54424
	FA83G_HUMAN	Protein FAM83G OS=Homo sapiens OX=9606 GN=FAM83G PE=1 SV=2	91063.8	139.42+-66.57	3.8+-1.83	4	5.04645e+06	2.71e+06	64999.5	56754.2	139	FA83G_HUMAN	0.000509005	0.000296722	7.82643e-05	6.82614e-05		1.69225	0.307745	5.49888
	UBN1_HUMAN	Ubinuclein-1 OS=Homo sapiens OX=9606 GN=UBN1 PE=1 SV=2	122016	138.86+-78.99	3.3+-1.25	3	1.71921e+06	2.09275e+06	43179.2	18668	138	UBN1_HUMAN	0.000173406	0.000229139	5.1991e-05	2.2453e-05		1.68786	0.312141	5.40735
	SNX18_HUMAN	Sorting nexin-18 OS=Homo sapiens OX=9606 GN=SNX18 PE=1 SV=2	69364.4	100.29+-6.37	2.7+-0.47	3	867149	885918	22558.1	5798.73	100	SNX18_HUMAN	8.7464e-05	9.70005e-05	2.71617e-05	6.97445e-06		1.68769	0.312315	5.40379
	GOPC_HUMAN	Golgi-associated PDZ and coiled-coil motif-containing protein OS=Homo sapiens OX=9606 GN=GOPC PE=1 SV=1	50887.9	96.84+-48.01	3.5+-1.5	2	3.03153e+06	643649	58279.9	0	96.	GOPC_HUMAN	0.000305772	7.04741e-05	7.01734e-05	0		1.68562	0.314383	5.36167
	CC85C_HUMAN	Coiled-coil domain-containing protein 85C OS=Homo sapiens OX=9606 GN=CCDC85C PE=1 SV=1	45467.1	370.27+-96.05	7.0+-2.9	4	6.5913e+06	7.49927e+06	101293	133570	370	CC85C_HUMAN	0.000664825	0.000821107	0.000121964	0.000160652		1.6804	0.319602	5.25779
	AGAP1_HUMAN	Arf-GAP with GTPase, ANK repeat and PH domain-containing protein 1 OS=Homo sapiens OX=9606 GN=AGAP1 PE=1 SV=4	95380.8	219.42+-70.38	2.3+-0.47	3	1.04071e+06	729062	29373.1	0	219	AGAP1_HUMAN	0.00010497	7.98261e-05	3.53674e-05	0		1.67872	0.321283	5.22503
	TAOK1_HUMAN	Serine/threonine-protein kinase TAO1 OS=Homo sapiens OX=9606 GN=TAOK1 PE=1 SV=1	116454	377.66+-143.6	9.0+-2.68	4	5.09228e+06	8.52883e+06	170736	60187.5	377	TAOK1_HUMAN	0.000513627	0.000933834	0.000205579	7.23909e-05		1.6778	0.322204	5.20725
	RSBN1_HUMAN	Lysine-specific demethylase 9 OS=Homo sapiens OX=9606 GN=RSBN1 PE=1 SV=2	90927.8	153.12+-68.02	2.7+-0.94	3	1579099	2.1704e+06	63394.5	0	153	RSBN1_HUMAN	0.000159274	0.00023764	7.63318e-05	0		1.67741	0.322588	5.19986
	TRIM3_HUMAN	Tripartite motif-containing protein 3 OS=Homo sapiens OX=9606 GN=TRIM3 PE=1 SV=2	81862.4	311.99+-189.54	5.2+-3.12	4	2.33167e+06	2.26952e+06	16675	60933	311	TRIM3_HUMAN	0.000235181	0.000248493	2.0078e-05	7.32875e-05		1.6764	0.323602	5.18044
	GAK_HUMAN	Cyclin-G-associated kinase OS=Homo sapiens OX=9606 GN=GAK PE=1 SV=2	144583	53.84+-3.17	2.0+-0.0	2	227283	518498	2659.48	10183.8	53.	GAK_HUMAN	2.29247e-05	5.67712e-05	3.20221e-06	1.22486e-05		1.67522	0.324778	5.15805
	TDRD3_HUMAN	Tudor domain-containing protein 3 OS=Homo sapiens OX=9606 GN=TDRD3 PE=1 SV=1	73424.8	487.67+-222.26	10.2+-4.83	4	8.91809e+06	9.43758e+06	135833	175639	487	TDRD3_HUMAN	0.000899513	0.00103333	0.000163553	0.00021125		1.67516	0.324835	5.15697
	MED17_HUMAN	Mediator of RNA polymerase II transcription subunit 17 OS=Homo sapiens OX=9606 GN=MED17 PE=1 SV=2	73357.7	177.25+-83.06	4.0+-2.0	2	1.01284e+06	1.86269e+06	24498.6	25135.7	177	MED17_HUMAN	0.000102159	0.000203949	2.94982e-05	3.02321e-05		1.67346	0.326539	5.12484
	NDC80_HUMAN	Kinetochore protein NDC80 homolog OS=Homo sapiens OX=9606 GN=NDC80 PE=1 SV=1	74379.7	269.66+-133.94	4.3+-1.7	3	1.65213e+06	2.13723e+06	39660.6	25538.7	269	NDC80_HUMAN	0.00016664	0.000234009	4.77543e-05	3.07168e-05		1.67244	0.327563	5.10569
	E2F8_HUMAN	Transcription factor E2F8 OS=Homo sapiens OX=9606 GN=E2F8 PE=1 SV=1	94734.8	191.42+-18.22	3.8+-0.43	3	735261	535416	2842.42	19771.6	191	E2F8_HUMAN	7.41613e-05	5.86236e-05	3.42249e-06	2.37804e-05		1.65994	0.340062	4.88128
	T2FA_HUMAN	General transcription factor IIF subunit 1 OS=Homo sapiens OX=9606 GN=GTF2F1 PE=1 SV=2	58262.1	467.14+-491.34	9.4+-9.2	4	6.00216e+06	1.13297e+07	152589	164063	467	T2FA_HUMAN	0.000605401	0.0012405	0.000183728	0.000197328		1.65778	0.342221	4.84418
	DGKD_HUMAN	Diacylglycerol kinase delta OS=Homo sapiens OX=9606 GN=DGKD PE=1 SV=4	136607	116.34+-16.78	2.3+-0.47	2	528950	1.43516e+06	16821.7	19489.2	116	DGKD_HUMAN	5.33519e-05	0.000157138	2.02546e-05	2.34407e-05		1.65619	0.343807	4.81723
	RPIA_HUMAN	Ribose-5-phosphate isomerase OS=Homo sapiens OX=9606 GN=RPIA PE=1 SV=3	33533.1	242.34+-23.91	3.0+-0.0	2	2.39862e+06	1.86643e+06	6757.98	70731.7	242	RPIA_HUMAN	0.000241934	0.000204358	8.13711e-06	8.50729e-05		1.65446	0.345541	4.78803
	SFR19_HUMAN	Splicing factor, arginine/serine-rich 19 OS=Homo sapiens OX=9606 GN=SCAF1 PE=1 SV=3	139814	88.07+-0.0	2.0+-0.0	1	114560	258024	0	6929.55	88.	SFR19_HUMAN	1.1555e-05	2.82514e-05	0	8.33455e-06		1.65374	0.346256	4.77608
	C2D1A_HUMAN	Coiled-coil and C2 domain-containing protein 1A OS=Homo sapiens OX=9606 GN=CC2D1A PE=1 SV=1	104397	84.21+-0.0	2.0+-0.0	1	75406.5	84961.5	2963.51	0	84.	C2D1A_HUMAN	7.6058e-06	9.30257e-06	3.56829e-06	0		1.65148	0.348523	4.73851
	SNX33_HUMAN	Sorting nexin-33 OS=Homo sapiens OX=9606 GN=SNX33 PE=1 SV=1	65565.3	293.24+-107.22	6.8+-2.64	4	8.06258e+06	5.64785e+06	89662.6	162495	293	SNX33_HUMAN	0.000813223	0.000618392	0.000107961	0.000195442		1.65026	0.34974	4.71854
	SNIP1_HUMAN	Smad nuclear-interacting protein 1 OS=Homo sapiens OX=9606 GN=SNIP1 PE=1 SV=1	45807.3	111.37+-37.42	3.3+-1.3	3	1.72351e+06	1.17751e+06	0	54274.2	111	SNIP1_HUMAN	0.00017384	0.000128927	0	6.52785e-05		1.64527	0.354731	4.63808
	WASL_HUMAN	Neural Wiskott-Aldrich syndrome protein OS=Homo sapiens OX=9606 GN=WASL PE=1 SV=2	55191.9	215.01+-113.34	5.3+-2.36	3	2.01252e+06	2.08894e+06	73901.3	4104.62	215	WASL_HUMAN	0.000202991	0.000228721	8.89827e-05	4.93685e-06		1.64264	0.357359	4.59662
	CSKI2_HUMAN	Caskin-2 OS=Homo sapiens OX=9606 GN=CASKIN2 PE=1 SV=2	127276	512.46+-295.54	10.4+-7.06	4	9.63423e+06	7.26969e+06	194984	129416	512	CSKI2_HUMAN	0.000971746	0.00079597	0.000234775	0.000155656		1.63818	0.361821	4.5276
	DEND3_HUMAN	DENN domain-containing protein 3 OS=Homo sapiens OX=9606 GN=DENND3 PE=1 SV=2	137741	189.76+-0.0	2.0+-0.0	1	350343	803435	0	22665.9	189	DEND3_HUMAN	3.53369e-05	8.79694e-05	0	2.72615e-05		1.63788	0.362116	4.52309
	BRE1A_HUMAN	E3 ubiquitin-protein ligase BRE1A OS=Homo sapiens OX=9606 GN=RNF20 PE=1 SV=2	114220	1431.31+-513.18	26.4+-12.5	4	3.37122e+07	2.81861e+07	459128	738632	143	BRE1A_HUMAN	0.00340034	0.00308614	0.000552824	0.000888393		1.63641	0.36359	4.5007
	HSPB1_HUMAN	Heat shock protein beta-1 OS=Homo sapiens OX=9606 GN=HSPB1 PE=1 SV=2	22825.5	217.75+-44.48	4.0+-0.82	3	6263153	4.80753e+06	130740	85683	217	HSPB1_HUMAN	0.000631726	0.000526384	0.000157421	0.000103056		1.63277	0.367234	4.44611
	OSBL6_HUMAN	Oxysterol-binding protein-related protein 6 OS=Homo sapiens OX=9606 GN=OSBPL6 PE=1 SV=1	107379	60.81+-14.29	2.0+-0.0	2	773044	230353	9055.41	10295.7	60.	OSBL6_HUMAN	7.79723e-05	2.52217e-05	1.09034e-05	1.23832e-05		1.63178	0.368224	4.43147
	SAS6_HUMAN	Spindle assembly abnormal protein 6 homolog OS=Homo sapiens OX=9606 GN=SASS6 PE=1 SV=1	74864.2	162.12+-33.97	2.5+-0.5	2	892370	711030	0	31584	162	SAS6_HUMAN	9.0008e-05	7.78517e-05	0	3.79878e-05		1.63091	0.369087	4.41878
	RB_HUMAN	Retinoblastoma-associated protein OS=Homo sapiens OX=9606 GN=RB1 PE=1 SV=2	106947	118.85+-48.66	2.5+-0.5	3	1.93367e+06	1.54055e+06	12955.5	55968.6	118	RB_HUMAN	0.000195037	0.000168677	1.55994e-05	6.73165e-05		1.6287	0.371295	4.38655
	AJUBA_HUMAN	LIM domain-containing protein ajuba OS=Homo sapiens OX=9606 GN=AJUBA PE=1 SV=1	58721.8	218.53+-97.11	4.2+-1.6	4	4.48401e+06	2.46316e+06	58666.6	78840.3	218	AJUBA_HUMAN	0.000452275	0.000269695	7.0639e-05	9.48256e-05		1.62709	0.372905	4.36329
	NU155_HUMAN	Nuclear pore complex protein Nup155 OS=Homo sapiens OX=9606 GN=NUP155 PE=1 SV=1	156697	423.29+-67.69	6.6+-1.96	4	5.69408e+06	5352136	88537.6	133252	423	NU155_HUMAN	0.000574327	0.000586014	0.000106606	0.00016027		1.62602	0.37398	4.34787
	SMRD2_HUMAN	SWI/SNF-related matrix-associated actin-dependent regulator of chromatin subfamily D member 2 OS=Homo sapiens OX=9606 GN=SMARCD2 PE=1 SV=3	59111.7	214.65+-97.52	4.6+-1.96	4	8.27975e+06	2927068	175787	45044.8	214	SMRD2_HUMAN	0.000835128	0.000320489	0.000211661	5.41778e-05		1.62596	0.374037	4.34706
	T2H2L_HUMAN	General transcription factor IIH subunit 2-like protein OS=Homo sapiens OX=9606 GN=GTF2H2C PE=1 SV=1	45506.4	99.7+-13.74	4.3+-1.7	3	1.73051e+06	1.88618e+06	39635.1	33804.3	99.	T2H2L_HUMAN	0.000174546	0.000206521	4.77236e-05	4.06583e-05		1.62347	0.376535	4.3116
	MTA3_HUMAN	Metastasis-associated protein MTA3 OS=Homo sapiens OX=9606 GN=MTA3 PE=1 SV=2	68202.3	122.48+-23.89	2.5+-0.5	2	0	1.24002e+06	11610.7	14562.3	122	MTA3_HUMAN	0	0.000135772	1.39801e-05	1.75149e-05		1.62342	0.376584	4.3109
	SF3B2_HUMAN	Splicing factor 3B subunit 2 OS=Homo sapiens OX=9606 GN=SF3B2 PE=1 SV=2	100279	682.87+-345.91	15.4+-9.13	4	1.47657e+07	2.372e+07	206668	584103	682	SF3B2_HUMAN	0.00148933	0.00259714	0.000248844	0.000702532		1.62231	0.377692	4.29533
	IWS1_HUMAN	Protein IWS1 homolog OS=Homo sapiens OX=9606 GN=IWS1 PE=1 SV=2	91956.2	119.52+-0.0	2.0+-0.0	1	109267	169100	5739.43	0	119	IWS1_HUMAN	1.10211e-05	1.8515e-05	6.9107e-06	0		1.62078	0.379221	4.27396
	EXOC2_HUMAN	Exocyst complex component 2 OS=Homo sapiens OX=9606 GN=EXOC2 PE=1 SV=1	105084	181.36+-0.7	3.0+-0.0	2	493181	484441	10013.2	9984.37	181	EXOC2_HUMAN	4.97442e-05	5.30422e-05	1.20566e-05	1.20088e-05		1.62057	0.379425	4.27113
	SMC6_HUMAN	Structural maintenance of chromosomes protein 6 OS=Homo sapiens OX=9606 GN=SMC6 PE=1 SV=2	127216	442.15+-229.46	8.0+-3.85	4	1.06689e+07	8.16152e+06	105948	289024	442	SMC6_HUMAN	0.00107611	0.000893618	0.000127569	0.000347625		1.61128	0.388719	4.1451
	CTF18_HUMAN	Chromosome transmission fidelity protein 18 homolog OS=Homo sapiens OX=9606 GN=CHTF18 PE=1 SV=1	108001	554.0+-222.82	10.0+-3.69	4	5.70096e+06	6.78754e+06	98190.4	166857	554	CTF18_HUMAN	0.000575022	0.000743178	0.000118229	0.000200689		1.61039	0.389608	4.13336
	PARVB_HUMAN	Beta-parvin OS=Homo sapiens OX=9606 GN=PARVB PE=1 SV=1	41745.1	132.84+-16.66	3.4+-0.49	4	4632420	2665356	75223.4	78035.4	132	PARVB_HUMAN	0.000467244	0.000291834	9.05746e-05	9.38575e-05		1.60905	0.390949	4.11576
	CBLB_HUMAN	E3 ubiquitin-protein ligase CBL-B OS=Homo sapiens OX=9606 GN=CBLB PE=1 SV=2	110863	165.38+-54.02	5.0+-1.22	3	1.01519e+06	1.48322e+06	10758.9	42826.6	165	CBLB_HUMAN	0.000102396	0.0001624	1.29545e-05	5.15099e-05		1.60843	0.39157	4.10764
	WIZ_HUMAN	Protein Wiz OS=Homo sapiens OX=9606 GN=WIZ PE=1 SV=2	180217	661.08+-449.41	17.6+-12.18	4	1.90681e+07	1.80005e+07	493711	308808	661	WIZ_HUMAN	0.00192328	0.0019709	0.000594465	0.000371421		1.60252	0.397479	4.03172
	FA83D_HUMAN	Protein FAM83D OS=Homo sapiens OX=9606 GN=FAM83D PE=1 SV=3	64840.5	262.15+-133.76	5.6+-3.32	4	3.87072e+06	5.38532e+06	105448	97275.6	262	FA83D_HUMAN	0.000390416	0.000589647	0.000126967	0.000116999		1.60137	0.398628	4.01721
	CTBP2_HUMAN	C-terminal-binding protein 2 OS=Homo sapiens OX=9606 GN=CTBP2 PE=1 SV=1	49427.3	228.15+-147.77	4.8+-3.49	4	6.44086e+06	2.12408e+06	103555	79119.5	228	CTBP2_HUMAN	0.000649651	0.000232568	0.000124688	9.51614e-05		1.60102	0.398976	4.01284
	PI42B_HUMAN	Phosphatidylinositol 5-phosphate 4-kinase type-2 beta OS=Homo sapiens OX=9606 GN=PIP4K2B PE=1 SV=1	47746.9	252.3+-166.12	5.6+-3.61	4	5.72416e+06	2.72913e+06	54553.7	127422	252	PI42B_HUMAN	0.000577361	0.000298817	6.56867e-05	0.000153257		1.60015	0.399853	4.00184
	EMSA1_HUMAN	ELM2 and SANT domain-containing protein 1 OS=Homo sapiens OX=9606 GN=ELMSAN1 PE=1 SV=2	115431	180.26+-64.72	3.8+-0.83	3	1.53808e+06	1538581	16587.6	50765.8	180	EMSA1_HUMAN	0.000155137	0.000168462	1.99727e-05	6.10588e-05		1.59948	0.400521	3.99349
	PCF11_HUMAN	Pre-mRNA cleavage complex 2 protein Pcf11 OS=Homo sapiens OX=9606 GN=PCF11 PE=1 SV=3	173628	557.34+-306.41	11.8+-5.49	4	1.19115e+07	1.32089e+07	365373	186857	557	PCF11_HUMAN	0.00120144	0.00144626	0.000439936	0.000224744		1.59867	0.401331	3.98342
	ARAP1_HUMAN	Arf-GAP with Rho-GAP domain, ANK repeat and PH domain-containing protein 1 OS=Homo sapiens OX=9606 GN=ARAP1 PE=1 SV=3	163743	497.31+-190.52	10.2+-5.23	4	1.05269e+07	6.92182e+06	174421	206879	497	ARAP1_HUMAN	0.00106179	0.000757881	0.000210016	0.000248825		1.59724	0.402756	3.96579
	MTMR2_HUMAN	Myotubularin-related protein 2 OS=Homo sapiens OX=9606 GN=MTMR2 PE=1 SV=4	73905.2	203.23+-136.85	4.4+-2.24	4	6.22725e+06	6.16721e+06	167235	107111	203	MTMR2_HUMAN	0.000628105	0.000675258	0.000201364	0.000128828		1.59574	0.404262	3.94729
	WDR70_HUMAN	WD repeat-containing protein 70 OS=Homo sapiens OX=9606 GN=WDR70 PE=1 SV=1	73896.3	417.84+-132.17	8.8+-3.25	4	1.39913e+07	9.80197e+06	374440	148697	417	WDR70_HUMAN	0.00141121	0.00107323	0.000450853	0.000178846		1.59559	0.404412	3.94545
	C170B_HUMAN	Centrosomal protein of 170 kDa protein B OS=Homo sapiens OX=9606 GN=CEP170B PE=1 SV=4	172154	325.94+-184.34	5.8+-2.71	4	2.45019e+06	2.7056e+06	45756.8	70312.6	325	C170B_HUMAN	0.000247136	0.00029624	5.50946e-05	8.45688e-05		1.59105	0.408947	3.89061
	FOLC_HUMAN	Folylpolyglutamate synthase, mitochondrial OS=Homo sapiens OX=9606 GN=FPGS PE=1 SV=3	65366.6	102.19+-26.02	2.0+-0.0	3	2562890	1652568	58409	35592.7	102	FOLC_HUMAN	0.000258503	0.000180942	7.03288e-05	4.28093e-05		1.59051	0.409488	3.88415
	WDR48_HUMAN	WD repeat-containing protein 48 OS=Homo sapiens OX=9606 GN=WDR48 PE=1 SV=1	77017.7	141.9+-32.29	3.0+-0.0	3	3.22125e+06	3.34544e+06	8426.02	140310	141	WDR48_HUMAN	0.000324908	0.000366297	1.01456e-05	0.000168758		1.58878	0.411221	3.86356
	CXXC1_HUMAN	CXXC-type zinc finger protein 1 OS=Homo sapiens OX=9606 GN=CXXC1 PE=1 SV=2	77544.9	86.5+-10.04	2.0+-0.0	3	1761915	763862	19819.4	36564.1	86.	CXXC1_HUMAN	0.000177714	8.36364e-05	2.3864e-05	4.39776e-05		1.58783	0.412171	3.85235
	APC1_HUMAN	Anaphase-promoting complex subunit 1 OS=Homo sapiens OX=9606 GN=ANAPC1 PE=1 SV=1	218528	522.44+-324.2	10.6+-5.75	4	8.89824e+06	9.49095e+06	278071	140849	522	APC1_HUMAN	0.000897512	0.00103918	0.000334818	0.000169407		1.58686	0.413144	3.84092
	SCAF8_HUMAN	SR-related and CTD-associated factor 8 OS=Homo sapiens OX=9606 GN=SCAF8 PE=1 SV=1	140775	239.03+-18.03	5.8+-0.98	4	2.56953e+06	4069402	136534	16366.5	239	SCAF8_HUMAN	0.000259173	0.000445565	0.000164397	1.96849e-05		1.58578	0.414217	3.82839
	ARI1B_HUMAN	AT-rich interactive domain-containing protein 1B OS=Homo sapiens OX=9606 GN=ARID1B PE=1 SV=2	237057	449.62+-266.3	10.4+-7.5	4	1.09652e+07	4.95791e+06	73730.5	284450	449	ARI1B_HUMAN	0.00110599	0.00054285	8.8777e-05	0.000342123		1.58562	0.414379	3.8265
	CMTR1_HUMAN	Cap-specific mRNA (nucleoside-2'-O-)-methyltransferase 1 OS=Homo sapiens OX=9606 GN=CMTR1 PE=1 SV=1	96172.3	685.11+-199.92	15.8+-5.11	4	2.17275e+07	1.64058e+07	374596	497559	685	CMTR1_HUMAN	0.00219153	0.0017963	0.000451041	0.000598442		1.58332	0.416684	3.7998
	SPA5L_HUMAN	Spermatogenesis-associated protein 5-like protein 1 OS=Homo sapiens OX=9606 GN=SPATA5L1 PE=1 SV=2	81515.2	352.46+-138.23	6.2+-2.14	4	6.01194e+06	4.43243e+06	104252	135772	352	SPA5L_HUMAN	0.000606388	0.000485313	0.000125528	0.000163301		1.58157	0.418431	3.77976
	TRIO_HUMAN	Triple functional domain protein OS=Homo sapiens OX=9606 GN=TRIO PE=1 SV=2	349762	306.16+-150.89	7.2+-2.93	4	5095432	5.17292e+06	149415	88270.7	306	TRIO_HUMAN	0.000513945	0.000566391	0.000179907	0.000106168		1.58128	0.418724	3.77642
	CSTF3_HUMAN	Cleavage stimulation factor subunit 3 OS=Homo sapiens OX=9606 GN=CSTF3 PE=1 SV=1	83324.9	138.19+-34.6	3.0+-0.0	2	1.0113e+06	402998	32161.6	0	138	CSTF3_HUMAN	0.000102003	4.41249e-05	3.87249e-05	0		1.58102	0.418981	3.77349
	ERC6L_HUMAN	DNA excision repair protein ERCC-6-like OS=Homo sapiens OX=9606 GN=ERCC6L PE=1 SV=1	141985	223.01+-82.78	4.0+-1.79	4	1.03054e+06	1.38084e+06	21814.6	34464.3	223	ERC6L_HUMAN	0.000103944	0.00015119	2.62664e-05	4.14521e-05		1.5805	0.419501	3.76757
	KPCI_HUMAN	Protein kinase C iota type OS=Homo sapiens OX=9606 GN=PRKCI PE=1 SV=2	69187.7	199.78+-88.9	3.7+-1.7	3	2560726	2.16394e+06	110969	0	199	KPCI_HUMAN	0.000258285	0.000236933	0.000133615	0		1.57504	0.424961	3.70631
	MTMR5_HUMAN	Myotubularin-related protein 5 OS=Homo sapiens OX=9606 GN=SBF1 PE=1 SV=4	210422	540.87+-101.38	12.8+-2.71	4	1.60241e+07	1.15105e+07	254328	391998	540	MTMR5_HUMAN	0.00161625	0.00126031	0.000306229	0.000471478		1.57436	0.425644	3.69876
	MARF1_HUMAN	Meiosis regulator and mRNA stability factor 1 OS=Homo sapiens OX=9606 GN=MARF1 PE=1 SV=6	195816	258.11+-143.03	5.2+-3.12	4	2.89043e+06	4.16113e+06	90115.4	81008.8	258	MARF1_HUMAN	0.00029154	0.000455609	0.000108506	9.74337e-05		1.56785	0.432152	3.62801
	NELFB_HUMAN	Negative elongation factor B OS=Homo sapiens OX=9606 GN=NELFB PE=1 SV=1	66282.6	107.41+-26.82	2.3+-0.47	3	624807	449780	16170	9603.76	107	NELFB_HUMAN	6.30205e-05	4.92472e-05	1.94699e-05	1.1551e-05		1.56702	0.432985	3.6191
	DMXL1_HUMAN	DmX-like protein 1 OS=Homo sapiens OX=9606 GN=DMXL1 PE=1 SV=3	341445	217.45+-161.25	5.4+-3.38	4	3497249	2.71202e+06	55750.1	93601.4	217	DMXL1_HUMAN	0.000352746	0.000296943	6.71273e-05	0.00011258		1.56666	0.433344	3.61527
	SETD2_HUMAN	Histone-lysine N-methyltransferase SETD2 OS=Homo sapiens OX=9606 GN=SETD2 PE=1 SV=3	290440	148.72+-87.77	3.5+-1.66	3	546200	267868	0	19598.2	148	SETD2_HUMAN	5.50919e-05	2.93293e-05	0	2.35719e-05		1.56346	0.436544	3.58144
	RBM33_HUMAN	RNA-binding protein 33 OS=Homo sapiens OX=9606 GN=RBM33 PE=1 SV=3	130191	703.79+-286.92	18.4+-9.77	4	2.06845e+07	2.01953e+07	475084	524006	703	RBM33_HUMAN	0.00208632	0.00221121	0.000572036	0.000630251		1.56279	0.437209	3.57447
	RPB2_HUMAN	DNA-directed RNA polymerase II subunit RPB2 OS=Homo sapiens OX=9606 GN=POLR2B PE=1 SV=1	135236	272.17+-128.58	6.2+-2.71	4	4.23652e+06	4.07549e+06	112997	90120.6	272	RPB2_HUMAN	0.000427312	0.000446231	0.000136057	0.000108393		1.5627	0.437301	3.5735
	COASY_HUMAN	Bifunctional coenzyme A synthase OS=Homo sapiens OX=9606 GN=COASY PE=1 SV=4	62632.1	81.49+-21.48	2.0+-0.0	4	1.20094e+06	948852	27851.5	24627.3	81.	COASY_HUMAN	0.000121131	0.000103891	3.35353e-05	2.96206e-05		1.56169	0.438311	3.56297
	AGAP3_HUMAN	Arf-GAP with GTPase, ANK repeat and PH domain-containing protein 3 OS=Homo sapiens OX=9606 GN=AGAP3 PE=1 SV=2	95897.6	265.05+-68.42	5.8+-2.4	4	4.77474e+06	4805592	97562.6	137990	265	AGAP3_HUMAN	0.000481599	0.000526172	0.000117473	0.000165968		1.56097	0.439031	3.55549
	RPRD2_HUMAN	Regulation of nuclear pre-mRNA domain-containing protein 2 OS=Homo sapiens OX=9606 GN=RPRD2 PE=1 SV=1	156380	1000.14+-310.99	19.4+-7.76	4	1.93176e+07	1.66061e+07	460942	421451	100	RPRD2_HUMAN	0.00194845	0.00181822	0.000555009	0.000506902		1.56016	0.439844	3.54707
	PDS5B_HUMAN	Sister chromatid cohesion protein PDS5 homolog B OS=Homo sapiens OX=9606 GN=PDS5B PE=1 SV=1	165818	505.85+-308.81	13.2+-9.83	4	9.42821e+06	1.03969e+07	257299	234635	505	PDS5B_HUMAN	0.000950967	0.00113838	0.000309807	0.000282208		1.55842	0.441578	3.52921
	NSE2_HUMAN	E3 SUMO-protein ligase NSE2 OS=Homo sapiens OX=9606 GN=NSMCE2 PE=1 SV=2	28257.1	182.21+-20.55	3.0+-0.0	2	922029	917448	34521.9	11045.2	182	NSE2_HUMAN	9.29995e-05	0.000100453	4.1567e-05	1.32847e-05		1.55819	0.44181	3.52683
	ACSL1_HUMAN	Long-chain-fatty-acid--CoA ligase 1 OS=Homo sapiens OX=9606 GN=ACSL1 PE=1 SV=1	78919.2	126.67+-61.04	3.0+-1.26	4	1.6497e+06	1.86707e+06	44623.8	43481.7	126	ACSL1_HUMAN	0.000166395	0.000204428	5.37304e-05	5.22978e-05		1.5553	0.444701	3.49741
	LAP2A_HUMAN	Lamina-associated polypeptide 2, isoform alpha OS=Homo sapiens OX=9606 GN=TMPO PE=1 SV=2	76015.8	669.49+-237.16	12.8+-5.56	4	1.38055e+07	1.20718e+07	413567	231488	669	LAP2A_HUMAN	0.00139248	0.00132176	0.000497965	0.000278424		1.55516	0.444842	3.49597
	GLCI1_HUMAN	Glucocorticoid-induced transcript 1 protein OS=Homo sapiens OX=9606 GN=GLCCI1 PE=1 SV=1	58672.1	340.55+-102.78	7.0+-2.1	4	6.21766e+06	7.87432e+06	214476	140196	340	GLCI1_HUMAN	0.000627137	0.000862172	0.000258246	0.000168622		1.55446	0.445541	3.48893
	MSL1_HUMAN	Male-specific lethal 1 homolog OS=Homo sapiens OX=9606 GN=MSL1 PE=1 SV=3	67770.9	172.53+-43.63	3.3+-0.47	3	1.60036e+06	3.35726e+06	79753.1	46274.1	172	MSL1_HUMAN	0.000161419	0.000367591	9.60287e-05	5.56564e-05		1.55432	0.445677	3.48756
	CCAR2_HUMAN	Cell cycle and apoptosis regulator protein 2 OS=Homo sapiens OX=9606 GN=CCAR2 PE=1 SV=2	103465	174.21+-104.63	4.4+-2.58	4	3.59001e+06	2.88162e+06	128621	33123.4	174	CCAR2_HUMAN	0.000362102	0.000315513	0.000154869	3.98394e-05		1.55359	0.446413	3.48015
	EMAL3_HUMAN	Echinoderm microtubule-associated protein-like 3 OS=Homo sapiens OX=9606 GN=EML3 PE=1 SV=1	96220.9	171.52+-28.93	2.5+-0.5	3	864269	735628	8495.33	31697.7	171	EMAL3_HUMAN	8.71735e-05	8.05451e-05	1.0229e-05	3.81246e-05		1.55243	0.447569	3.46859
	TAF10_HUMAN	Transcription initiation factor TFIID subunit 10 OS=Homo sapiens OX=9606 GN=TAF10 PE=1 SV=1	21811.9	238.23+-34.76	2.0+-0.0	2	153663	446609	0	15446.6	238	TAF10_HUMAN	1.5499e-05	4.88999e-05	0	1.85785e-05		1.5522	0.447796	3.46631
	AGFG1_HUMAN	Arf-GAP domain and FG repeat-containing protein 1 OS=Homo sapiens OX=9606 GN=AGFG1 PE=1 SV=2	58509.3	135.83+-23.12	2.0+-0.0	2	495590	110318	7398.39	7557.04	135	AGFG1_HUMAN	4.99872e-05	1.20789e-05	8.90822e-06	9.08927e-06		1.55042	0.44958	3.4486
	EI2BD_HUMAN	Translation initiation factor eIF-2B subunit delta OS=Homo sapiens OX=9606 GN=EIF2B4 PE=1 SV=2	58034.5	161.58+-78.65	3.5+-1.5	2	1.15079e+06	521393	26768.5	15001	161	EI2BD_HUMAN	0.000116073	5.70881e-05	3.22312e-05	1.80425e-05		1.54999	0.450008	3.44437
	WDR33_HUMAN	pre-mRNA 3' end processing protein WDR33 OS=Homo sapiens OX=9606 GN=WDR33 PE=1 SV=2	146198	163.34+-72.75	3.4+-1.74	4	2.92373e+06	3.58432e+06	118142	48685.7	163	WDR33_HUMAN	0.000294899	0.000392452	0.000142252	5.8557e-05		1.54781	0.452191	3.42291
	SNTB2_HUMAN	Beta-2-syntrophin OS=Homo sapiens OX=9606 GN=SNTB2 PE=1 SV=1	58369.2	139.2+-31.9	2.5+-0.5	2	180820	403286	0	15167.8	139	SNTB2_HUMAN	1.82382e-05	4.41564e-05	0	1.82431e-05		1.54753	0.452471	3.42017
	FA76A_HUMAN	Protein FAM76A OS=Homo sapiens OX=9606 GN=FAM76A PE=2 SV=1	35995.9	95.39+-11.98	2.5+-0.5	2	359761	1.06612e+06	19825.9	17417.8	95.	FA76A_HUMAN	3.62869e-05	0.000116731	2.38719e-05	2.09494e-05		1.54689	0.453108	3.41395
	BTAF1_HUMAN	TATA-binding protein-associated factor 172 OS=Homo sapiens OX=9606 GN=BTAF1 PE=1 SV=2	209037	148.87+-79.04	4.2+-2.4	4	2.4859e+06	2.92701e+06	87809.9	53369.3	148	BTAF1_HUMAN	0.000250737	0.000320483	0.00010573	6.41902e-05		1.54146	0.458536	3.3617
	PALLD_HUMAN	Palladin OS=Homo sapiens OX=9606 GN=PALLD PE=1 SV=3	151839	939.7+-160.99	20.8+-6.11	4	2.76578e+07	2.88547e+07	826401	650686	939	PALLD_HUMAN	0.00278968	0.00315934	0.000995049	0.000782616		1.53986	0.460137	3.34654
	MP2K7_HUMAN	Dual specificity mitogen-activated protein kinase kinase 7 OS=Homo sapiens OX=9606 GN=MAP2K7 PE=1 SV=2	47910.7	75.18+-29.8	2.0+-0.0	4	734682	425249	7663.82	22319	75.	MP2K7_HUMAN	7.41029e-05	4.65612e-05	9.22781e-06	2.68443e-05		1.53971	0.460291	3.34508
	RPGF2_HUMAN	Rap guanine nucleotide exchange factor 2 OS=Homo sapiens OX=9606 GN=RAPGEF2 PE=1 SV=1	168168	193.41+-73.87	4.3+-1.64	3	1.81036e+06	1379237	0	83184.2	193	RPGF2_HUMAN	0.0001826	0.000151015	0	0.00010005		1.53858	0.461417	3.33447
	ZIC5_HUMAN	Zinc finger protein ZIC 5 OS=Homo sapiens OX=9606 GN=ZIC5 PE=1 SV=2	69202.6	120.35+-46.1	2.0+-0.0	3	602359	445545	16235.2	11080.5	120	ZIC5_HUMAN	6.07563e-05	4.87834e-05	1.95484e-05	1.33271e-05		1.53831	0.461685	3.33195
	LRWD1_HUMAN	Leucine-rich repeat and WD repeat-containing protein 1 OS=Homo sapiens OX=9606 GN=LRWD1 PE=1 SV=2	72070.7	693.67+-170.51	15.2+-6.01	4	2.3741e+07	2.08745e+07	571772	598915	693	LRWD1_HUMAN	0.00239461	0.00228558	0.000688457	0.000720348		1.53726	0.462737	3.32211
	TRI14_HUMAN	Tripartite motif-containing protein 14 OS=Homo sapiens OX=9606 GN=TRIM14 PE=1 SV=2	50596.7	110.94+-24.62	2.0+-0.0	2	899439	314223	10120.2	21188.1	110	TRI14_HUMAN	9.0721e-05	3.44048e-05	1.21855e-05	2.54841e-05		1.53721	0.462785	3.32166
	BAP18_HUMAN	Chromatin complexes subunit BAP18 OS=Homo sapiens OX=9606 GN=BAP18 PE=1 SV=1	17946.3	131.14+-24.36	2.5+-0.5	2	891984	1.40147e+06	35409.1	25785.6	131	BAP18_HUMAN	8.9969e-05	0.000153449	4.26352e-05	3.10138e-05		1.53544	0.464564	3.30511
	MTA70_HUMAN	N6-adenosine-methyltransferase catalytic subunit OS=Homo sapiens OX=9606 GN=METTL3 PE=1 SV=2	65174.8	337.95+-262.11	6.6+-4.13	4	6.19557e+06	1.46676e+07	307288	267636	337	MTA70_HUMAN	0.00062491	0.00160598	0.000369997	0.000321901		1.52655	0.47345	3.22431
	K1586_HUMAN	E3 SUMO-protein ligase KIAA1586 OS=Homo sapiens OX=9606 GN=KIAA1586 PE=1 SV=2	90585.8	174.98+-2.42	4.0+-0.0	2	1056966	1075554	32689	25609.5	174	K1586_HUMAN	0.00010661	0.000117764	3.936e-05	3.0802e-05		1.52358	0.476424	3.19794
	FMR1_HUMAN	Synaptic functional regulator FMR1 OS=Homo sapiens OX=9606 GN=FMR1 PE=1 SV=1	71473	110.0+-37.34	2.7+-0.94	3	4.45891e+06	2.47071e+06	189278	0	110	FMR1_HUMAN	0.000449743	0.000270521	0.000227905	0		1.51927	0.480725	3.16038
	UN13D_HUMAN	Protein unc-13 homolog D OS=Homo sapiens OX=9606 GN=UNC13D PE=1 SV=1	124288	260.54+-135.02	5.6+-3.07	4	3.04029e+06	3.86613e+06	104004	88034.7	260	UN13D_HUMAN	0.000306656	0.000423309	0.000125229	0.000105884		1.51905	0.480946	3.15847
	KCD14_HUMAN	BTB/POZ domain-containing protein KCTD14 OS=Homo sapiens OX=9606 GN=KCTD14 PE=1 SV=2	29800.1	135.35+-48.67	3.3+-1.25	3	1.5969e+06	3.734e+06	104314	46170.3	135	KCD14_HUMAN	0.00016107	0.000408841	0.000125602	5.55316e-05		1.51765	0.482351	3.14636
	TRI32_HUMAN	E3 ubiquitin-protein ligase TRIM32 OS=Homo sapiens OX=9606 GN=TRIM32 PE=1 SV=2	73539	145.44+-51.86	2.5+-0.5	2	837729	499769	0	36836.8	145	TRI32_HUMAN	8.44967e-05	5.47204e-05	0	4.43056e-05		1.51716	0.482835	3.1422
	L2GL1_HUMAN	Lethal(2) giant larvae protein homolog 1 OS=Homo sapiens OX=9606 GN=LLGL1 PE=1 SV=3	116657	212.99+-61.46	4.0+-1.0	2	2.99653e+06	1.5969e+06	66371.9	59960.9	212	L2GL1_HUMAN	0.000302242	0.000174847	7.99167e-05	7.21183e-05		1.51668	0.483323	3.13802
	ARHG1_HUMAN	Rho guanine nucleotide exchange factor 1 OS=Homo sapiens OX=9606 GN=ARHGEF1 PE=1 SV=2	103056	119.27+-81.7	3.0+-1.41	2	867930	316797	1346.86	31037.3	119	ARHG1_HUMAN	8.75428e-05	3.46866e-05	1.62172e-06	3.73302e-05		1.51667	0.483331	3.13795
	SP6_HUMAN	Transcription factor Sp6 OS=Homo sapiens OX=9606 GN=SP6 PE=2 SV=1	40555.6	168.46+-15.41	3.0+-0.0	2	1.81884e+06	5.22626e+06	100652	100220	168	SP6_HUMAN	0.000183455	0.000572232	0.000121193	0.00012054		1.51528	0.484717	3.12612
	EDC3_HUMAN	Enhancer of mRNA-decapping protein 3 OS=Homo sapiens OX=9606 GN=EDC3 PE=1 SV=1	56783.6	155.43+-28.27	3.5+-0.87	3	2.44874e+06	3.97981e+06	23610.9	158159	155	EDC3_HUMAN	0.000246989	0.000435755	2.84293e-05	0.000190226		1.51485	0.485147	3.12246
	FOXK2_HUMAN	Forkhead box protein K2 OS=Homo sapiens OX=9606 GN=FOXK2 PE=1 SV=3	69247.7	249.02+-135.67	5.0+-2.45	4	4.39642e+06	4.00558e+06	123256	112598	249	FOXK2_HUMAN	0.00044344	0.000438577	0.000148409	0.000135428		1.51308	0.486917	3.10747
	PRD16_HUMAN	Histone-lysine N-methyltransferase PRDM16 OS=Homo sapiens OX=9606 GN=PRDM16 PE=1 SV=3	142272	162.85+-38.91	3.0+-0.63	4	904109	2.27859e+06	45401.7	45960.1	162	PRD16_HUMAN	9.1192e-05	0.000249486	5.46671e-05	5.52787e-05		1.51203	0.487971	3.0986
	CL16A_HUMAN	Protein CLEC16A OS=Homo sapiens OX=9606 GN=CLEC16A PE=1 SV=2	118610	224.88+-64.9	3.8+-1.3	3	2.33386e+06	1321756	8813.75	93563.9	224	CL16A_HUMAN	0.000235402	0.000144721	1.06124e-05	0.000112534		1.51061	0.489387	3.08675
	MADD_HUMAN	MAP kinase-activating death domain protein OS=Homo sapiens OX=9606 GN=MADD PE=1 SV=2	184500	162.12+-0.0	3.0+-0.0	1	0	594963	0	17632.7	162	MADD_HUMAN	0	6.51434e-05	0	2.12078e-05		1.5088	0.491198	3.07168
	DGKZ_HUMAN	Diacylglycerol kinase zeta OS=Homo sapiens OX=9606 GN=DGKZ PE=1 SV=3	125704	151.51+-15.75	2.6+-0.49	4	1.29319e+06	867303	16312.8	44823.8	151	DGKZ_HUMAN	0.000130436	9.49624e-05	1.96418e-05	5.3912e-05		1.50792	0.492077	3.0644
	OSBL3_HUMAN	Oxysterol-binding protein-related protein 3 OS=Homo sapiens OX=9606 GN=OSBPL3 PE=1 SV=1	102130	402.16+-102.42	7.2+-2.4	4	5.70244e+06	7.84986e+06	139646	255827	402	OSBL3_HUMAN	0.00057517	0.000859493	0.000168144	0.000307697		1.50187	0.498132	3.015
	MAGA1_HUMAN	Melanoma-associated antigen 1 OS=Homo sapiens OX=9606 GN=MAGEA1 PE=1 SV=1	34605.5	155.19+-52.62	4.2+-1.33	4	2.22041e+06	1568797	36359	72967.3	155	MAGA1_HUMAN	0.000223959	0.00017177	4.37789e-05	8.77618e-05		1.50105	0.49895	3.00842
	BAG3_HUMAN	BAG family molecular chaperone regulator 3 OS=Homo sapiens OX=9606 GN=BAG3 PE=1 SV=3	61727.9	317.62+-69.97	9.8+-3.66	4	8.55325e+06	5.4158e+06	226485	176187	317	BAG3_HUMAN	0.000862715	0.000592985	0.000272705	0.000211909		1.50048	0.499522	3.00383
	MORC2_HUMAN	ATPase MORC2 OS=Homo sapiens OX=9606 GN=MORC2 PE=1 SV=2	118548	364.69+-251.92	8.2+-4.35	4	9.22542e+06	8.74627e+06	156486	368068	364	MORC2_HUMAN	0.000930512	0.000957643	0.000188421	0.000442696		1.49897	0.501031	2.99177
	RB15B_HUMAN	Putative RNA-binding protein 15B OS=Homo sapiens OX=9606 GN=RBM15B PE=1 SV=3	97431.6	176.44+-44.59	4.6+-1.96	4	5.88071e+06	3.1234e+06	63749.2	196186	176	RB15B_HUMAN	0.000593152	0.000341986	7.67588e-05	0.000235963		1.49879	0.501214	2.99032
	RAVR1_HUMAN	Ribonucleoprotein PTB-binding 1 OS=Homo sapiens OX=9606 GN=RAVER1 PE=1 SV=1	64464.4	327.22+-75.21	7.4+-2.15	4	5.25494e+06	4688277	126927	164688	327	RAVR1_HUMAN	0.000530034	0.000513327	0.00015283	0.00019808		1.49664	0.50336	2.9733
	TF3C5_HUMAN	General transcription factor 3C polypeptide 5 OS=Homo sapiens OX=9606 GN=GTF3C5 PE=1 SV=2	59989.3	381.26+-76.97	8.6+-2.33	4	1.1278e+07	1.15669e+07	174363	499296	381	TF3C5_HUMAN	0.00113754	0.00126647	0.000209947	0.000600531		1.49574	0.504265	2.96617
	DPOD2_HUMAN	DNA polymerase delta subunit 2 OS=Homo sapiens OX=9606 GN=POLD2 PE=1 SV=1	51884.2	238.22+-81.5	4.3+-1.3	3	2.74173e+06	1.9038e+06	38626.9	101677	238	DPOD2_HUMAN	0.000276542	0.00020845	4.65096e-05	0.000122293		1.48362	0.516378	2.87313
	INT4_HUMAN	Integrator complex subunit 4 OS=Homo sapiens OX=9606 GN=INTS4 PE=1 SV=2	109071	146.08+-69.36	3.0+-1.22	3	2.10875e+06	935830	60237.1	31242.7	146	INT4_HUMAN	0.000212697	0.000102465	7.253e-05	3.75773e-05		1.48218	0.517824	2.86232
	M4K1_HUMAN	Mitogen-activated protein kinase kinase kinase kinase 1 OS=Homo sapiens OX=9606 GN=MAP4K1 PE=1 SV=1	92264.6	139.22+-29.7	3.5+-0.5	2	769550	828524	3494.9	45576.6	139	M4K1_HUMAN	7.76199e-05	9.07163e-05	4.20812e-06	5.48175e-05		1.48078	0.519222	2.85192
	SUPT3_HUMAN	Transcription initiation protein SPT3 homolog OS=Homo sapiens OX=9606 GN=SUPT3H PE=1 SV=3	36055.1	110.8+-0.0	2.0+-0.0	1	239250	142526	2352.68	9306.37	110	SUPT3_HUMAN	2.41317e-05	1.56053e-05	2.8328e-06	1.11933e-05		1.47823	0.521773	2.83308
	SMG8_HUMAN	Protein SMG8 OS=Homo sapiens OX=9606 GN=SMG8 PE=1 SV=1	110983	125.53+-47.28	2.6+-0.49	4	1.13098e+06	1.02353e+06	36899.1	29482.9	125	SMG8_HUMAN	0.000114075	0.000112068	4.44293e-05	3.54608e-05		1.4779	0.522102	2.83067
	INP4A_HUMAN	Inositol polyphosphate-4-phosphatase type I A OS=Homo sapiens OX=9606 GN=INPP4A PE=1 SV=1	111539	371.61+-89.03	6.4+-1.5	4	6.80584e+06	4.04417e+06	208098	125903	371	INP4A_HUMAN	0.000686464	0.000442802	0.000250565	0.000151431		1.47495	0.525052	2.80915
	THA11_HUMAN	THAP domain-containing protein 11 OS=Homo sapiens OX=9606 GN=THAP11 PE=1 SV=2	34775.6	187.02+-50.79	4.0+-1.26	4	3.5473e+06	3.13919e+06	82842.5	124899	187	THA11_HUMAN	0.000357795	0.000343714	9.97486e-05	0.000150223		1.47456	0.525436	2.80636
	SEH1_HUMAN	Nucleoporin SEH1 OS=Homo sapiens OX=9606 GN=SEH1L PE=1 SV=3	40136.6	127.31+-13.58	2.0+-0.0	2	555739	605323	19673.9	16587.7	127	SEH1_HUMAN	5.6054e-05	6.62778e-05	2.36888e-05	1.9951e-05		1.47413	0.525871	2.80322
	MSH6_HUMAN	DNA mismatch repair protein Msh6 OS=Homo sapiens OX=9606 GN=MSH6 PE=1 SV=2	154514	989.11+-386.81	23.2+-10.11	4	1.94867e+07	2.32589e+07	751914	593481	989	MSH6_HUMAN	0.00196551	0.00254665	0.000905361	0.000713813		1.47184	0.528164	2.7867
	GIT1_HUMAN	ARF GTPase-activating protein GIT1 OS=Homo sapiens OX=9606 GN=GIT1 PE=1 SV=2	85030.1	253.17+-118.95	5.5+-2.18	3	2.02896e+06	3.06038e+06	42585.4	118535	253	GIT1_HUMAN	0.000204649	0.000335086	5.1276e-05	0.000142569		1.47151	0.528491	2.78436
	BI2L2_HUMAN	Brain-specific angiogenesis inhibitor 1-associated protein 2-like protein 2 OS=Homo sapiens OX=9606 GN=BAIAP2L2 PE=1 SV=1	59063.6	168.45+-10.73	2.5+-0.5	2	247194	332939	8189.13	10190.3	168	BI2L2_HUMAN	2.4933e-05	3.6454e-05	9.86033e-06	1.22565e-05		1.47028	0.52972	2.77558
	ERCC3_HUMAN	General transcription and DNA repair factor IIH helicase subunit XPB OS=Homo sapiens OX=9606 GN=ERCC3 PE=1 SV=1	90019.3	486.79+-97.69	8.3+-0.94	3	3.64304e+06	3.11213e+06	210338	3184.48	486	ERCC3_HUMAN	0.000367451	0.000340752	0.000253263	3.83015e-06		1.46733	0.532672	2.75466
	FOG1_HUMAN	Zinc finger protein ZFPM1 OS=Homo sapiens OX=9606 GN=ZFPM1 PE=1 SV=2	106476	98.52+-13.47	2.3+-0.47	3	631429	761771	26807.7	17949.2	98.	FOG1_HUMAN	6.36884e-05	8.34075e-05	3.22785e-05	2.15885e-05		1.46391	0.536089	2.73072
	NIPBL_HUMAN	Nipped-B-like protein OS=Homo sapiens OX=9606 GN=NIPBL PE=1 SV=2	317907	807.5+-372.69	17.0+-8.56	4	1.02847e+07	8.72787e+06	347314	261828	807	NIPBL_HUMAN	0.00103736	0.000955628	0.000418192	0.000314915		1.46216	0.537844	2.71855
	MTA2_HUMAN	Metastasis-associated protein MTA2 OS=Homo sapiens OX=9606 GN=MTA2 PE=1 SV=1	75717	477.65+-247.32	10.6+-6.18	4	6.64324e+06	8.08318e+06	231829	244535	477	MTA2_HUMAN	0.000670063	0.00088504	0.000279139	0.000294116		1.46132	0.538683	2.71276
	ASTE1_HUMAN	Protein asteroid homolog 1 OS=Homo sapiens OX=9606 GN=ASTE1 PE=1 SV=1	78412	94.96+-23.16	2.0+-0.0	3	875650	843856	55412.5	0	94.	ASTE1_HUMAN	8.83215e-05	9.23951e-05	6.67208e-05	0		1.46071	0.539294	2.70855
	PI42C_HUMAN	Phosphatidylinositol 5-phosphate 4-kinase type-2 gamma OS=Homo sapiens OX=9606 GN=PIP4K2C PE=1 SV=3	47441.2	412.15+-57.75	9.2+-2.71	4	6.73901e+06	6.40925e+06	198179	228469	412	PI42C_HUMAN	0.000679724	0.000701759	0.000238623	0.000274792		1.45811	0.541892	2.69077
	NOP9_HUMAN	Nucleolar protein 9 OS=Homo sapiens OX=9606 GN=NOP9 PE=1 SV=1	70135.7	198.4+-46.8	5.0+-1.1	4	2.25548e+06	2.2829e+06	39111.5	108921	198	NOP9_HUMAN	0.000227496	0.000249958	4.70932e-05	0.000131005		1.45665	0.543354	2.68084
	ZSC21_HUMAN	Zinc finger and SCAN domain-containing protein 21 OS=Homo sapiens OX=9606 GN=ZSCAN21 PE=1 SV=2	54764.8	160.52+-1.74	3.0+-0.0	2	426277	467173	29230.7	0	160	ZSC21_HUMAN	4.29959e-05	5.11515e-05	3.51959e-05	0		1.45578	0.544224	2.67495
	CHAP1_HUMAN	Chromosome alignment-maintaining phosphoprotein 1 OS=Homo sapiens OX=9606 GN=CHAMP1 PE=1 SV=2	90012.3	1245.29+-191.62	47.8+-16.24	4	6.62524e+07	6.00178e+07	2.01222e+06	2.12627e+06	124	CHAP1_HUMAN	0.00668247	0.00657144	0.00242286	0.00255738		1.45375	0.546254	2.6613
	TRI18_HUMAN	E3 ubiquitin-protein ligase Midline-1 OS=Homo sapiens OX=9606 GN=MID1 PE=1 SV=1	76913.2	94.25+-39.56	3.3+-1.3	3	3636391	2.80266e+06	58264.2	153862	94.	TRI18_HUMAN	0.000366781	0.000306868	7.01545e-05	0.000185058		1.45048	0.549518	2.63956
	ZHX2_HUMAN	Zinc fingers and homeoboxes protein 2 OS=Homo sapiens OX=9606 GN=ZHX2 PE=1 SV=1	92934	404.44+-268.3	10.8+-6.82	4	8.66716e+06	9.93187e+06	473095	144430	404	ZHX2_HUMAN	0.000874204	0.00108746	0.000569641	0.000173714		1.45039	0.549613	2.63893
	CAMP1_HUMAN	Calmodulin-regulated spectrin-associated protein 1 OS=Homo sapiens OX=9606 GN=CAMSAP1 PE=1 SV=2	179230	635.37+-169.05	14.6+-4.63	4	1.2262e+07	6.23811e+06	286367	319213	635	CAMP1_HUMAN	0.00123679	0.000683021	0.000344807	0.000383935		1.44971	0.550295	2.63442
	BCR_HUMAN	Breakpoint cluster region protein OS=Homo sapiens OX=9606 GN=BCR PE=1 SV=2	143756	390.54+-83.7	6.6+-1.74	4	4.34763e+06	4.72441e+06	137140	164848	390	BCR_HUMAN	0.000438519	0.000517283	0.000165127	0.000198272		1.44906	0.550938	2.63017
	PUR1_HUMAN	Amidophosphoribosyltransferase OS=Homo sapiens OX=9606 GN=PPAT PE=1 SV=1	58160.7	231.03+-79.92	3.8+-1.47	4	2705523	1863323	83287.1	68890.8	231	PUR1_HUMAN	0.00027289	0.000204018	0.000100284	8.28588e-05		1.44506	0.554935	2.60402
	MYPN_HUMAN	Myopalladin OS=Homo sapiens OX=9606 GN=MYPN PE=1 SV=2	146706	147.41+-34.12	2.8+-0.75	4	1.4169e+06	2.09832e+06	87667.4	32219.9	147	MYPN_HUMAN	0.000142914	0.000229749	0.000105558	3.87526e-05		1.44171	0.55829	2.58237
	R3HD1_HUMAN	R3H domain-containing protein 1 OS=Homo sapiens OX=9606 GN=R3HDM1 PE=1 SV=3	121305	462.82+-184.7	9.8+-3.87	4	6.10462e+06	5.19672e+06	148486	233974	462	R3HD1_HUMAN	0.000615736	0.000568997	0.000178788	0.000281413		1.44046	0.559537	2.57438
	MS3L1_HUMAN	Male-specific lethal 3 homolog OS=Homo sapiens OX=9606 GN=MSL3 PE=1 SV=1	60242.7	85.81+-14.08	3.0+-0.0	4	2.23258e+06	1841873	66852.8	71334.5	85.	MS3L1_HUMAN	0.000225187	0.00020167	8.04958e-05	8.57979e-05		1.43929	0.560714	2.56688
	EH1L1_HUMAN	EH domain-binding protein 1-like protein 1 OS=Homo sapiens OX=9606 GN=EHBP1L1 PE=1 SV=2	162554	194.62+-68.8	3.8+-1.47	4	1.02625e+06	950234	44742.3	22444.7	194	EH1L1_HUMAN	0.000103512	0.000104043	5.38731e-05	2.69954e-05		1.43924	0.560764	2.56657
	MOCOS_HUMAN	Molybdenum cofactor sulfurase OS=Homo sapiens OX=9606 GN=MOCOS PE=1 SV=2	99084.3	544.49+-211.9	10.6+-3.72	4	1.16284e+07	1.11255e+07	396673	377812	544	MOCOS_HUMAN	0.00117289	0.00121815	0.000477624	0.000454415		1.43905	0.560949	2.56538
	SFPQ_HUMAN	Splicing factor, proline- and glutamine-rich OS=Homo sapiens OX=9606 GN=SFPQ PE=1 SV=2	76215.7	1391.03+-344.17	44.8+-14.86	4	6.80786e+07	8.89358e+07	2.04002e+06	3.38771e+06	139	SFPQ_HUMAN	0.00686668	0.00973772	0.00245634	0.00407459		1.43542	0.564585	2.54243
	MPLKI_HUMAN	M-phase-specific PLK1-interacting protein OS=Homo sapiens OX=9606 GN=MPLKIP PE=1 SV=1	19192.1	179.99+-51.59	3.0+-1.0	2	903309	481892	25583.3	21477	179	MPLKI_HUMAN	9.11113e-05	5.27631e-05	3.08042e-05	2.58316e-05		1.43508	0.564917	2.54034
	ZFP91_HUMAN	E3 ubiquitin-protein ligase ZFP91 OS=Homo sapiens OX=9606 GN=ZFP91 PE=1 SV=1	64261.1	195.55+-59.96	4.6+-1.62	4	667131	2.26616e+06	79231.2	24011.3	195	ZFP91_HUMAN	6.72895e-05	0.000248126	9.54003e-05	2.88797e-05		1.4347	0.565301	2.53794
	LRCH3_HUMAN	DISP complex protein LRCH3 OS=Homo sapiens OX=9606 GN=LRCH3 PE=1 SV=2	87113.4	382.37+-206.73	8.8+-5.27	4	9.29256e+06	6.60539e+06	319357	224797	382	LRCH3_HUMAN	0.000937284	0.000723234	0.00038453	0.000270376		1.43431	0.56569	2.53551
	TDRD7_HUMAN	Tudor domain-containing protein 7 OS=Homo sapiens OX=9606 GN=TDRD7 PE=1 SV=2	125046	144.78+-76.74	4.0+-1.9	4	2.40164e+06	3.19449e+06	159030	35348.2	144	TDRD7_HUMAN	0.000242239	0.00034977	0.000191484	4.25153e-05		1.43342	0.566579	2.52996
	CCNB1_HUMAN	G2/mitotic-specific cyclin-B1 OS=Homo sapiens OX=9606 GN=CCNB1 PE=1 SV=1	48591.2	169.78+-29.23	3.4+-0.8	4	1.95218e+06	2.00236e+06	71178.8	66388.3	169	CCNB1_HUMAN	0.000196905	0.000219241	8.57047e-05	7.98489e-05		1.43079	0.569206	2.51366
	NLRC5_HUMAN	Protein NLRC5 OS=Homo sapiens OX=9606 GN=NLRC5 PE=1 SV=3	208627	134.94+-38.82	2.5+-0.5	2	419816	148298	0	19459.4	134	NLRC5_HUMAN	4.23443e-05	1.62374e-05	0	2.34049e-05		1.42906	0.570944	2.50297
	ATF7_HUMAN	Cyclic AMP-dependent transcription factor ATF-7 OS=Homo sapiens OX=9606 GN=ATF7 PE=1 SV=2	53333.3	233.49+-43.1	3.5+-0.5	2	728002	867797	41358.8	15137.9	233	ATF7_HUMAN	7.34292e-05	9.50165e-05	4.97991e-05	1.82071e-05		1.42478	0.575223	2.47692
	PDS5A_HUMAN	Sister chromatid cohesion protein PDS5 homolog A OS=Homo sapiens OX=9606 GN=PDS5A PE=1 SV=1	152274	701.97+-281.98	12.6+-4.59	4	5.51837e+06	4.1966e+06	105405	235695	701	PDS5A_HUMAN	0.000556605	0.000459492	0.000126916	0.000283483		1.42461	0.575394	2.47588
	PAR14_HUMAN	Protein mono-ADP-ribosyltransferase PARP14 OS=Homo sapiens OX=9606 GN=PARP14 PE=1 SV=3	204725	1542.4+-464.43	33.4+-11.5	4	2.64352e+07	2.23451e+07	707620	1.00974e+06	154	PAR14_HUMAN	0.00266636	0.0024466	0.000852028	0.00121447		1.42433	0.575671	2.47421
	AXIN1_HUMAN	Axin-1 OS=Homo sapiens OX=9606 GN=AXIN1 PE=1 SV=2	96487.9	212.23+-0.0	3.0+-0.0	1	97722.3	768902	10849.1	20838.1	212	AXIN1_HUMAN	9.85666e-06	8.41882e-05	1.30631e-05	2.50632e-05		1.42308	0.576923	2.46667
	TRIR_HUMAN	Telomerase RNA component interacting RNase OS=Homo sapiens OX=9606 GN=TRIR PE=1 SV=1	18465.3	133.04+-21.2	3.0+-0.0	2	138284	179578	11360.7	0	133	TRIR_HUMAN	1.39478e-05	1.96623e-05	1.36791e-05	0		1.42147	0.57853	2.45704
	CNDD3_HUMAN	Condensin-2 complex subunit D3 OS=Homo sapiens OX=9606 GN=NCAPD3 PE=1 SV=2	170950	282.87+-82.18	5.8+-1.47	4	2.33063e+06	2.37769e+06	125122	43621.2	282	CNDD3_HUMAN	0.000235077	0.000260337	0.000150656	5.24657e-05		1.41844	0.581565	2.439
	RBM22_HUMAN	Pre-mRNA-splicing factor RBM22 OS=Homo sapiens OX=9606 GN=RBM22 PE=1 SV=1	47606.6	81.17+-24.21	2.6+-0.8	4	595765	1.08727e+06	28193.3	33002.5	81.	RBM22_HUMAN	6.00912e-05	0.000119047	3.39468e-05	3.9694e-05		1.41735	0.58265	2.43259
	BORG4_HUMAN	Cdc42 effector protein 4 OS=Homo sapiens OX=9606 GN=CDC42EP4 PE=1 SV=1	38013.6	331.06+-83.93	4.5+-1.5	2	1.4749e+06	887552	43328.1	40709.3	331	BORG4_HUMAN	0.000148765	9.71794e-05	5.21703e-05	4.89634e-05		1.41723	0.582773	2.43187
	TIF1B_HUMAN	Transcription intermediary factor 1-beta OS=Homo sapiens OX=9606 GN=TRIM28 PE=1 SV=5	90261.1	853.71+-403.95	18.2+-8.84	4	2.55595e+07	22332026	882930	837358	853	TIF1B_HUMAN	0.00257803	0.00244517	0.00106311	0.00100714		1.41629	0.583708	2.42637
	IMA4_HUMAN	Importin subunit alpha-4 OS=Homo sapiens OX=9606 GN=KPNA3 PE=1 SV=2	58288	92.06+-22.67	2.5+-0.5	2	542426	482367	19450.2	17600.8	92.	IMA4_HUMAN	5.47112e-05	5.28151e-05	2.34195e-05	2.11695e-05		1.41375	0.586253	2.4115
	BAZ1A_HUMAN	Bromodomain adjacent to zinc finger domain protein 1A OS=Homo sapiens OX=9606 GN=BAZ1A PE=1 SV=2	180246	680.02+-257.89	13.2+-4.79	4	7.2243e+06	6.32278e+06	235128	258229	680	BAZ1A_HUMAN	0.000728672	0.000692292	0.000283112	0.000310586		1.41062	0.589378	2.39341
	NXF1_HUMAN	Nuclear RNA export factor 1 OS=Homo sapiens OX=9606 GN=NXF1 PE=1 SV=1	70651.9	689.78+-134.92	15.2+-4.12	4	1.56271e+07	1.9797e+07	443241	872088	689	NXF1_HUMAN	0.00157621	0.00216761	0.000533695	0.00104891		1.40575	0.594247	2.3656
	BIP_HUMAN	Endoplasmic reticulum chaperone BiP OS=Homo sapiens OX=9606 GN=HSPA5 PE=1 SV=2	72402.5	943.37+-166.67	22.6+-5.54	4	2.64763e+07	2.30797e+07	492038	1.33537e+06	943	BIP_HUMAN	0.0026705	0.00252704	0.000592451	0.00160612		1.40548	0.594521	2.36405
	KCTD3_HUMAN	BTB/POZ domain-containing protein KCTD3 OS=Homo sapiens OX=9606 GN=KCTD3 PE=1 SV=2	89612.9	249.33+-96.32	5.6+-2.06	4	4.33834e+06	3.52148e+06	150989	139389	249	KCTD3_HUMAN	0.000437582	0.000385572	0.000181802	0.000167651		1.40397	0.596028	2.35555
	TUT4_HUMAN	Terminal uridylyltransferase 4 OS=Homo sapiens OX=9606 GN=TUT4 PE=1 SV=3	188014	186.58+-58.23	3.6+-1.36	4	2637246	2.78199e+06	107412	94050.9	186	TUT4_HUMAN	0.000266003	0.000304604	0.000129333	0.00011312		1.4036	0.596396	2.35348
	CIC_HUMAN	Protein capicua homolog OS=Homo sapiens OX=9606 GN=CIC PE=1 SV=2	164289	89.46+-49.84	2.8+-1.17	4	748749	1.28144e+06	40387.5	35986.1	89.	CIC_HUMAN	7.55218e-05	0.000140307	4.86296e-05	4.32825e-05		1.40267	0.597335	2.34821
	WDR82_HUMAN	WD repeat-containing protein 82 OS=Homo sapiens OX=9606 GN=WDR82 PE=1 SV=1	35455.6	240.04+-54.48	4.6+-1.5	4	3.64922e+06	3.01866e+06	97976.8	150163	240	WDR82_HUMAN	0.000368075	0.000330518	0.000117971	0.00018061		1.40115	0.598854	2.33971
	GCP2_HUMAN	Gamma-tubulin complex component 2 OS=Homo sapiens OX=9606 GN=TUBGCP2 PE=1 SV=2	103096	572.45+-115.16	12.8+-3.25	4	8.59329e+06	9.17749e+06	214806	454468	572	GCP2_HUMAN	0.000866753	0.00100486	0.000258642	0.000546614		1.39836	0.601641	2.32424
	ESPL1_HUMAN	Separin OS=Homo sapiens OX=9606 GN=ESPL1 PE=1 SV=3	236564	102.33+-5.57	2.0+-0.0	3	499407	432512	26985.2	7961.59	102	ESPL1_HUMAN	5.03721e-05	4.73564e-05	3.24923e-05	9.57584e-06		1.39815	0.601847	2.3231
	BZW2_HUMAN	Basic leucine zipper and W2 domain-containing protein 2 OS=Homo sapiens OX=9606 GN=BZW2 PE=1 SV=1	48360.1	107.09+-39.36	2.4+-0.49	4	1.40672e+06	1.17212e+06	43862.5	52974.3	107	BZW2_HUMAN	0.000141888	0.000128338	5.28137e-05	6.37151e-05		1.3974	0.602599	2.31896
	COBL_HUMAN	Protein cordon-bleu OS=Homo sapiens OX=9606 GN=COBL PE=1 SV=2	136446	714.84+-96.51	13.6+-2.8	4	9.21115e+06	1.17757e+07	434255	366208	714	COBL_HUMAN	0.000929073	0.00128934	0.000522876	0.000440458		1.39446	0.605538	2.30285
	C19L2_HUMAN	CWF19-like protein 2 OS=Homo sapiens OX=9606 GN=CWF19L2 PE=1 SV=4	104292	409.3+-135.09	8.8+-2.48	4	8.40063e+06	1.05674e+07	342279	383170	409	C19L2_HUMAN	0.000847321	0.00115705	0.00041213	0.000460859		1.3932	0.6068	2.29598
	NFKB2_HUMAN	Nuclear factor NF-kappa-B p100 subunit OS=Homo sapiens OX=9606 GN=NFKB2 PE=1 SV=4	97373.2	223.68+-54.87	4.8+-1.6	4	2.62294e+06	3.52997e+06	93371.9	145247	223	NFKB2_HUMAN	0.00026456	0.000386502	0.000112427	0.000174697		1.38792	0.612083	2.26753
	SMAG2_HUMAN	Protein Smaug homolog 2 OS=Homo sapiens OX=9606 GN=SAMD4B PE=1 SV=1	75892.4	213.41+-0.0	3.0+-0.0	1	143579	640569	23927.5	7076.59	213	SMAG2_HUMAN	1.4482e-05	7.01369e-05	2.88105e-05	8.51141e-06		1.38787	0.612131	2.26727
	SPD2B_HUMAN	SH3 and PX domain-containing protein 2B OS=Homo sapiens OX=9606 GN=SH3PXD2B PE=1 SV=3	101972	107.45+-0.0	2.0+-0.0	1	150990	516871	26416.8	0	107	SPD2B_HUMAN	1.52294e-05	5.6593e-05	3.18078e-05	0		1.38613	0.613871	2.25801
	MED31_HUMAN	Mediator of RNA polymerase II transcription subunit 31 OS=Homo sapiens OX=9606 GN=MED31 PE=1 SV=1	15966	67.27+-0.0	2.0+-0.0	1	101011	257376	10391	3797.08	67.	MED31_HUMAN	1.01884e-05	2.81805e-05	1.25116e-05	4.56696e-06		1.38397	0.616027	2.24661
	CAMP2_HUMAN	Calmodulin-regulated spectrin-associated protein 2 OS=Homo sapiens OX=9606 GN=CAMSAP2 PE=1 SV=3	169181	478.75+-199.57	9.8+-5.31	4	8.77082e+06	5.6305e+06	321264	234025	478	CAMP2_HUMAN	0.00088466	0.000616492	0.000386826	0.000281475		1.3839	0.616101	2.24622
	UBP36_HUMAN	Ubiquitin carboxyl-terminal hydrolase 36 OS=Homo sapiens OX=9606 GN=USP36 PE=1 SV=4	124143	165.14+-47.72	4.2+-1.17	4	3.64478e+06	1.99405e+06	134963	82746.6	165	UBP36_HUMAN	0.000367627	0.000218332	0.000162505	9.95239e-05		1.382	0.618003	2.23623
	RN168_HUMAN	E3 ubiquitin-protein ligase RNF168 OS=Homo sapiens OX=9606 GN=RNF168 PE=1 SV=1	66119.7	567.86+-145.41	11.4+-1.96	4	4.68763e+06	5.27817e+06	207047	184272	567	RN168_HUMAN	0.000472812	0.000577915	0.0002493	0.000221635		1.38103	0.618974	2.23116
	TNK1_HUMAN	Non-receptor tyrosine-protein kinase TNK1 OS=Homo sapiens OX=9606 GN=TNK1 PE=1 SV=3	73048.9	400.34+-81.71	11.4+-5.08	4	8.13968e+06	9.23224e+06	371990	313582	400	TNK1_HUMAN	0.000821	0.00101085	0.000447903	0.000377162		1.37893	0.621069	2.22025
	NR2C1_HUMAN	Nuclear receptor subfamily 2 group C member 1 OS=Homo sapiens OX=9606 GN=NR2C1 PE=1 SV=2	68297.8	89.19+-10.66	2.0+-0.0	3	485932	527246	21408.7	18704.7	89.	NR2C1_HUMAN	4.9013e-05	5.7729e-05	2.57777e-05	2.24972e-05		1.37717	0.622834	2.21113
	SH22A_HUMAN	SH2 domain-containing protein 2A OS=Homo sapiens OX=9606 GN=SH2D2A PE=1 SV=3	43192.8	231.77+-86.51	4.6+-1.85	4	4.06255e+06	6.27867e+06	234282	181196	231	SH22A_HUMAN	0.000409765	0.000687461	0.000282093	0.000217934		1.37389	0.626108	2.19433
	UBP22_HUMAN	Ubiquitin carboxyl-terminal hydrolase 22 OS=Homo sapiens OX=9606 GN=USP22 PE=1 SV=2	61404	158.38+-84.8	4.8+-1.94	4	3.44235e+06	4.43423e+06	160119	155544	158	UBP22_HUMAN	0.000347209	0.00048551	0.000192796	0.000187082		1.37345	0.626552	2.19207
	PLRG1_HUMAN	Pleiotropic regulator 1 OS=Homo sapiens OX=9606 GN=PLRG1 PE=1 SV=1	57500.2	179.63+-26.88	3.5+-0.5	2	958292	685963	12626.9	52548.3	179	PLRG1_HUMAN	9.66571e-05	7.51072e-05	1.52038e-05	6.32028e-05		1.37318	0.626824	2.19069
	BRE1B_HUMAN	E3 ubiquitin-protein ligase BRE1B OS=Homo sapiens OX=9606 GN=RNF40 PE=1 SV=5	114350	1309.78+-569.88	24.2+-11.89	4	3.21699e+07	2.47641e+07	972090	1.29339e+06	130	BRE1B_HUMAN	0.00324479	0.00271146	0.00117047	0.00155563		1.37204	0.627963	2.1849
	PDLI7_HUMAN	PDZ and LIM domain protein 7 OS=Homo sapiens OX=9606 GN=PDLIM7 PE=1 SV=1	50896	248.45+-96.8	5.2+-2.23	4	7.75262e+06	7.40572e+06	311251	296226	248	PDLI7_HUMAN	0.00078196	0.000810864	0.00037477	0.000356288		1.37083	0.629169	2.17879
	SF3B3_HUMAN	Splicing factor 3B subunit 3 OS=Homo sapiens OX=9606 GN=SF3B3 PE=1 SV=4	136575	74.32+-0.0	2.0+-0.0	1	674196	353491	0	40805.8	74.	SF3B3_HUMAN	6.80021e-05	3.87043e-05	0	4.90794e-05		1.36991	0.630088	2.17416
	NUDC1_HUMAN	NudC domain-containing protein 1 OS=Homo sapiens OX=9606 GN=NUDCD1 PE=1 SV=2	67511.6	91.79+-5.38	2.0+-0.0	2	738458	417677	0	45979.3	91.	NUDC1_HUMAN	7.44838e-05	4.57321e-05	0	5.53018e-05		1.36984	0.630157	2.17381
	DPOD1_HUMAN	DNA polymerase delta catalytic subunit OS=Homo sapiens OX=9606 GN=POLD1 PE=1 SV=2	125035	333.9+-53.2	7.2+-0.98	4	3.60418e+06	1.72946e+06	93775.1	119981	333	DPOD1_HUMAN	0.000363532	0.000189362	0.000112912	0.000144307		1.36498	0.635022	2.1495
	NSD3_HUMAN	Histone-lysine N-methyltransferase NSD3 OS=Homo sapiens OX=9606 GN=NSD3 PE=1 SV=1	165330	197.83+-83.76	3.5+-1.5	3	994343	1.14846e+06	5360.65	82261.5	197	NSD3_HUMAN	0.000100293	0.000125747	6.45462e-06	9.89405e-05		1.36401	0.635992	2.14469
	CPSF2_HUMAN	Cleavage and polyadenylation specificity factor subunit 2 OS=Homo sapiens OX=9606 GN=CPSF2 PE=1 SV=2	89286	258.92+-113.51	6.0+-2.76	4	4.97672e+06	3.54886e+06	149920	195602	258	CPSF2_HUMAN	0.000501972	0.00038857	0.000180515	0.000235261		1.36344	0.636561	2.14188
	RIN1_HUMAN	Ras and Rab interactor 1 OS=Homo sapiens OX=9606 GN=RIN1 PE=1 SV=4	84901.8	395.46+-94.34	6.6+-1.74	4	4.51164e+06	5.3941e+06	165904	242607	395	RIN1_HUMAN	0.000455062	0.000590608	0.00019976	0.000291797		1.36046	0.639537	2.12726
	CCAR1_HUMAN	Cell division cycle and apoptosis regulator protein 1 OS=Homo sapiens OX=9606 GN=CCAR1 PE=1 SV=2	133423	130.26+-65.16	4.0+-1.26	4	2.24454e+06	1.70553e+06	101726	59755.9	130	CCAR1_HUMAN	0.000226393	0.000186741	0.000122486	7.18717e-05		1.36013	0.639869	2.12564
	STRAP_HUMAN	Serine-threonine kinase receptor-associated protein OS=Homo sapiens OX=9606 GN=STRAP PE=1 SV=1	38756.1	504.97+-71.58	10.0+-0.63	4	1.87053e+07	1.24702e+07	606373	667416	504	STRAP_HUMAN	0.00188669	0.00136539	0.000730119	0.000802738		1.3593	0.640702	2.12158
	BI2L1_HUMAN	Brain-specific angiogenesis inhibitor 1-associated protein 2-like protein 1 OS=Homo sapiens OX=9606 GN=BAIAP2L1 PE=1 SV=2	57189.2	719.61+-101.82	14.2+-1.33	4	1.56261e+07	9.02826e+06	531894	478006	719	BI2L1_HUMAN	0.00157611	0.000988519	0.00064044	0.000574924		1.35695	0.643052	2.11017
	TAOK3_HUMAN	Serine/threonine-protein kinase TAO3 OS=Homo sapiens OX=9606 GN=TAOK3 PE=1 SV=2	105796	409.19+-288.41	11.6+-6.86	4	6.13642e+06	5.10696e+06	239336	228773	409	TAOK3_HUMAN	0.000618943	0.000559169	0.000288178	0.000275157		1.35303	0.646974	2.09132
	INT13_HUMAN	Integrator complex subunit 13 OS=Homo sapiens OX=9606 GN=INTS13 PE=1 SV=2	81143.7	229.58+-109.94	5.0+-2.19	4	4.324e+06	4.24754e+06	174747	184976	229	INT13_HUMAN	0.000436135	0.00046507	0.000210409	0.000222481		1.35104	0.648964	2.08184
	ORC3_HUMAN	Origin recognition complex subunit 3 OS=Homo sapiens OX=9606 GN=ORC3 PE=1 SV=1	83284.9	936.82+-232.05	22.2+-7.33	4	1.99328e+07	2.12364e+07	1.01546e+06	731931	936	ORC3_HUMAN	0.0020105	0.0023252	0.00122269	0.000880334		1.34676	0.653241	2.06166
	IF16_HUMAN	Gamma-interferon-inducible protein 16 OS=Homo sapiens OX=9606 GN=IFI16 PE=1 SV=3	88655.6	808.79+-278.32	25.8+-14.08	4	3.00096e+07	2.04995e+07	1.1422e+06	982918	808	IF16_HUMAN	0.00302689	0.00224452	0.0013753	0.00118221		1.34665	0.65335	2.06115
	DVL2_HUMAN	Segment polarity protein dishevelled homolog DVL-2 OS=Homo sapiens OX=9606 GN=DVL2 PE=1 SV=1	79183.7	135.28+-68.01	2.7+-0.94	3	666963	837916	64085	0	135	DVL2_HUMAN	6.72725e-05	9.17447e-05	7.71631e-05	0		1.34657	0.653425	2.06079
	FOXK1_HUMAN	Forkhead box protein K1 OS=Homo sapiens OX=9606 GN=FOXK1 PE=1 SV=1	75866.8	403.11+-154.48	10.6+-5.39	4	6.47386e+06	5.92613e+06	263780	262385	403	FOXK1_HUMAN	0.000652979	0.000648861	0.000317611	0.000315585		1.34555	0.654454	2.05598
	PR40A_HUMAN	Pre-mRNA-processing factor 40 homolog A OS=Homo sapiens OX=9606 GN=PRPF40A PE=1 SV=2	109022	278.71+-168.3	4.6+-2.42	4	2.87619e+06	2.22139e+06	89747	126053	278	PR40A_HUMAN	0.000290104	0.000243223	0.000108062	0.000151611		1.34509	0.654914	2.05384
	IASPP_HUMAN	RelA-associated inhibitor OS=Homo sapiens OX=9606 GN=PPP1R13L PE=1 SV=4	89377.9	158.68+-56.02	3.3+-0.47	3	812504	870436	52429	19503.2	158	IASPP_HUMAN	8.19523e-05	9.53054e-05	6.31284e-05	2.34575e-05		1.34366	0.656343	2.04719
	CPSF6_HUMAN	Cleavage and polyadenylation specificity factor subunit 6 OS=Homo sapiens OX=9606 GN=CPSF6 PE=1 SV=2	59344.5	577.06+-171.41	14.2+-4.4	4	2.03801e+07	1.67047e+07	944672	646728	577	CPSF6_HUMAN	0.00205562	0.00182903	0.00113746	0.000777855		1.33954	0.660457	2.02821
	S30BP_HUMAN	SAP30-binding protein OS=Homo sapiens OX=9606 GN=SAP30BP PE=1 SV=1	33963.7	277.1+-64.64	6.8+-2.64	4	4.48632e+06	6.89118e+06	331278	164964	277	S30BP_HUMAN	0.000452508	0.000754526	0.000398884	0.000198411		1.33793	0.662069	2.02083
	RAE1L_HUMAN	mRNA export factor OS=Homo sapiens OX=9606 GN=RAE1 PE=1 SV=1	41569.1	170.67+-0.0	3.0+-0.0	1	431305	765517	28565.9	23836.5	170	RAE1L_HUMAN	4.35031e-05	8.38176e-05	3.43955e-05	2.86695e-05		1.3375	0.662497	2.01888
	ARIP4_HUMAN	Helicase ARIP4 OS=Homo sapiens OX=9606 GN=RAD54L2 PE=1 SV=4	164036	269.52+-18.74	5.6+-0.49	4	3.2371e+06	3.94665e+06	156242	156657	269	ARIP4_HUMAN	0.000326507	0.000432125	0.000188127	0.000188419		1.33659	0.663414	2.01471
	CC138_HUMAN	Coiled-coil domain-containing protein 138 OS=Homo sapiens OX=9606 GN=CCDC138 PE=1 SV=1	76912	97.93+-21.78	2.3+-0.47	3	848845	511066	41160.1	17446.6	97.	CC138_HUMAN	8.56179e-05	5.59575e-05	4.95598e-05	2.0984e-05		1.33487	0.665134	2.00691
	SHOC2_HUMAN	Leucine-rich repeat protein SHOC-2 OS=Homo sapiens OX=9606 GN=SHOC2 PE=1 SV=2	65303.7	210.01+-28.1	4.8+-1.6	4	5.12094e+06	3.52606e+06	296790	78004.2	210	SHOC2_HUMAN	0.000516518	0.000386073	0.000357358	9.38199e-05		1.33345	0.66655	2.00052
	RTEL1_HUMAN	Regulator of telomere elongation helicase 1 OS=Homo sapiens OX=9606 GN=RTEL1 PE=1 SV=2	134968	117.04+-5.62	2.2+-0.4	4	422256	1.55686e+06	54174.1	34321.1	117	RTEL1_HUMAN	4.25904e-05	0.000170463	6.52297e-05	4.12799e-05		1.33341	0.666595	2.00032
	ARHG5_HUMAN	Rho guanine nucleotide exchange factor 5 OS=Homo sapiens OX=9606 GN=ARHGEF5 PE=1 SV=3	177888	482.54+-91.11	10.6+-2.06	4	7.10171e+06	5.24454e+06	321519	215246	482	ARHG5_HUMAN	0.000716307	0.000574233	0.000387133	0.000258888		1.33282	0.667184	1.99767
	PRS56_HUMAN	Serine protease 56 OS=Homo sapiens OX=9606 GN=PRSS56 PE=1 SV=1	65582.8	126.34+-17.6	2.2+-0.4	4	1153780	1.181e+06	49276.1	52949	126	PRS56_HUMAN	0.000116375	0.000129309	5.93322e-05	6.36846e-05		1.3327	0.667299	1.99716
	SAMH1_HUMAN	Deoxynucleoside triphosphate triphosphohydrolase SAMHD1 OS=Homo sapiens OX=9606 GN=SAMHD1 PE=1 SV=2	72896.1	295.38+-65.77	6.2+-1.72	4	2.05797e+06	1.68875e+06	31772.4	131653	295	SAMH1_HUMAN	0.000207575	0.000184904	3.82564e-05	0.000158347		1.33251	0.66749	1.9963
	NFX1_HUMAN	Transcriptional repressor NF-X1 OS=Homo sapiens OX=9606 GN=NFX1 PE=1 SV=2	130014	520.26+-38.41	8.8+-0.98	4	5.86935e+06	6.6975e+06	222854	329069	520	NFX1_HUMAN	0.000592006	0.00073332	0.000268332	0.00039579		1.33236	0.667644	1.99561
	TF3C2_HUMAN	General transcription factor 3C polypeptide 2 OS=Homo sapiens OX=9606 GN=GTF3C2 PE=1 SV=2	101699	375.23+-78.38	8.2+-1.33	4	5.46967e+06	5.1386e+06	206610	257543	375	TF3C2_HUMAN	0.000551692	0.000562633	0.000248773	0.000309761		1.33224	0.66776	1.99509
	MCM8_HUMAN	DNA helicase MCM8 OS=Homo sapiens OX=9606 GN=MCM8 PE=1 SV=2	94493.1	378.7+-96.34	7.8+-3.49	4	5.5321e+06	3.2942e+06	159712	226034	378	MCM8_HUMAN	0.000557989	0.000360687	0.000192305	0.000271864		1.32867	0.671325	1.97918
	RAVR2_HUMAN	Ribonucleoprotein PTB-binding 2 OS=Homo sapiens OX=9606 GN=RAVER2 PE=1 SV=2	74975.9	160.76+-65.43	3.2+-1.94	4	4.27606e+06	1289560	95971.6	145097	160	RAVR2_HUMAN	0.0004313	0.000141196	0.000115557	0.000174516		1.32742	0.672579	1.97363
	APC7_HUMAN	Anaphase-promoting complex subunit 7 OS=Homo sapiens OX=9606 GN=ANAPC7 PE=1 SV=4	67440.1	196.57+-38.23	3.8+-0.75	4	2998755	3.02546e+06	129124	138994	196	APC7_HUMAN	0.000302466	0.000331263	0.000155475	0.000167176		1.32527	0.674734	1.96413
	KDM4B_HUMAN	Lysine-specific demethylase 4B OS=Homo sapiens OX=9606 GN=KDM4B PE=1 SV=4	123701	143.36+-57.68	3.4+-1.2	4	1.24818e+06	2464763	103231	65036.9	143	KDM4B_HUMAN	0.000125897	0.000269871	0.000124298	7.82235e-05		1.323	0.677002	1.9542
	ABL1_HUMAN	Tyrosine-protein kinase ABL1 OS=Homo sapiens OX=9606 GN=ABL1 PE=1 SV=4	123595	354.15+-133.98	8.4+-3.2	4	8.05283e+06	4.31499e+06	283473	264367	354	ABL1_HUMAN	0.00081224	0.000472455	0.000341323	0.000317968		1.32171	0.678288	1.9486
	MINY4_HUMAN	Probable ubiquitin carboxyl-terminal hydrolase MINDY-4 OS=Homo sapiens OX=9606 GN=MINDY4 PE=1 SV=2	85231.4	153.45+-24.33	2.8+-0.4	4	2.11155e+06	1.35143e+06	51308.9	102668	153	MINY4_HUMAN	0.000212979	0.00014797	6.17798e-05	0.000123484		1.32164	0.678358	1.9483
	LIPB1_HUMAN	Liprin-beta-1 OS=Homo sapiens OX=9606 GN=PPFIBP1 PE=1 SV=2	114523	103.27+-20.81	2.0+-0.0	2	225412	310353	24510.5	0	103	LIPB1_HUMAN	2.2736e-05	3.3981e-05	2.95125e-05	0		1.31549	0.68451	1.9218
	RAI1_HUMAN	Retinoic acid-induced protein 1 OS=Homo sapiens OX=9606 GN=RAI1 PE=1 SV=2	206191	138.27+-27.73	2.3+-0.43	3	377770	368637	0	33960.5	138	RAI1_HUMAN	3.81034e-05	4.03626e-05	0	4.08461e-05		1.31531	0.684693	1.92102
	SPN90_HUMAN	NCK-interacting protein with SH3 domain OS=Homo sapiens OX=9606 GN=NCKIPSD PE=1 SV=1	79651.4	453.22+-170.59	6.4+-2.15	4	2.56625e+06	2.27321e+06	89100.1	130560	453	SPN90_HUMAN	0.000258842	0.000248897	0.000107283	0.000157032		1.31529	0.684706	1.92096
	PDLI5_HUMAN	PDZ and LIM domain protein 5 OS=Homo sapiens OX=9606 GN=PDLIM5 PE=1 SV=5	65101.9	363.11+-97.72	7.0+-1.9	4	7.36126e+06	9.46232e+06	527702	242937	363	PDLI5_HUMAN	0.000742486	0.00103604	0.000635393	0.000292194		1.31445	0.685548	1.91737
	PATL1_HUMAN	Protein PAT1 homolog 1 OS=Homo sapiens OX=9606 GN=PATL1 PE=1 SV=2	87137.7	624.44+-95.74	12.4+-2.94	4	1.03552e+07	7.98141e+06	371011	465122	624	PATL1_HUMAN	0.00104447	0.000873896	0.000446725	0.000559428		1.31192	0.688081	1.90663
	SKA3_HUMAN	Spindle and kinetochore-associated protein 3 OS=Homo sapiens OX=9606 GN=SKA3 PE=1 SV=2	46843.4	551.51+-44.84	10.8+-1.6	4	1.68069e+07	9.36661e+06	675307	511081	551	SKA3_HUMAN	0.00169521	0.00102556	0.00081312	0.000614706		1.31166	0.688342	1.90553
	NUP98_HUMAN	Nuclear pore complex protein Nup98-Nup96 OS=Homo sapiens OX=9606 GN=NUP98 PE=1 SV=4	198597	358.06+-44.98	8.4+-1.36	4	1.40947e+07	6.33215e+06	410114	515962	358	NUP98_HUMAN	0.00142165	0.000693317	0.000493808	0.000620575		1.30984	0.69016	1.89788
	TLK2_HUMAN	Serine/threonine-protein kinase tousled-like 2 OS=Homo sapiens OX=9606 GN=TLK2 PE=1 SV=2	88404.8	570.35+-140.48	9.6+-1.62	4	7.07797e+06	4.73562e+06	338295	206164	570	TLK2_HUMAN	0.000713912	0.00051851	0.000407333	0.000247965		1.30573	0.694274	1.88071
	KLF5_HUMAN	Krueppel-like factor 5 OS=Homo sapiens OX=9606 GN=KLF5 PE=1 SV=2	51272.6	97.77+-40.66	2.6+-0.8	4	3376666	1774967	96612.7	140599	97.	KLF5_HUMAN	0.000340584	0.000194344	0.000116329	0.000169106		1.30413	0.695874	1.87408
	MLH1_HUMAN	DNA mismatch repair protein Mlh1 OS=Homo sapiens OX=9606 GN=MLH1 PE=1 SV=1	85175.3	263.3+-57.87	4.6+-1.96	4	2.03379e+06	2.66991e+06	118309	102363	263	MLH1_HUMAN	0.000205136	0.000292332	0.000142453	0.000123117		1.30391	0.696086	1.87321
	RBM47_HUMAN	RNA-binding protein 47 OS=Homo sapiens OX=9606 GN=RBM47 PE=1 SV=2	64514.4	203.62+-71.44	4.0+-2.0	4	1.1991e+06	3.4571e+06	81027.7	141445	203	RBM47_HUMAN	0.000120946	0.000378523	9.75634e-05	0.000170123		1.30213	0.697868	1.86587
	GPTC8_HUMAN	G patch domain-containing protein 8 OS=Homo sapiens OX=9606 GN=GPATCH8 PE=1 SV=2	165010	165.98+-48.38	4.0+-0.89	4	1.22572e+06	1.35585e+06	55615.9	65769	165	GPTC8_HUMAN	0.000123631	0.000148454	6.69657e-05	7.9104e-05		1.30136	0.698639	1.86271
	ACL6A_HUMAN	Actin-like protein 6A OS=Homo sapiens OX=9606 GN=ACTL6A PE=1 SV=1	47943.5	277.06+-67.44	5.2+-0.98	4	4970634	5.4736e+06	138600	355491	277	ACL6A_HUMAN	0.000501358	0.000599313	0.000166884	0.000427569		1.29863	0.701368	1.85157
	SPAST_HUMAN	Spastin OS=Homo sapiens OX=9606 GN=SPAST PE=1 SV=1	67497.3	333.45+-55.16	6.8+-1.6	4	6.18281e+06	4.18971e+06	310701	179725	333	SPAST_HUMAN	0.000623623	0.000458738	0.000374107	0.000216166		1.2942	0.705801	1.83366
	ZZZ3_HUMAN	ZZ-type zinc finger-containing protein 3 OS=Homo sapiens OX=9606 GN=ZZZ3 PE=1 SV=1	103328	142.58+-29.69	3.2+-0.4	4	1.88142e+06	1.63629e+06	104629	63863	142	ZZZ3_HUMAN	0.000189768	0.00017916	0.000125981	7.68116e-05		1.29059	0.709412	1.81924
	LENG9_HUMAN	Leukocyte receptor cluster member 9 OS=Homo sapiens OX=9606 GN=LENG9 PE=2 SV=2	53817.7	241.7+-74.91	4.8+-1.47	4	6.3046e+06	6.62813e+06	261650	360548	241	LENG9_HUMAN	0.000635907	0.000725725	0.000315047	0.000433651		1.29044	0.709555	1.81867
	BRSK2_HUMAN	Serine/threonine-protein kinase BRSK2 OS=Homo sapiens OX=9606 GN=BRSK2 PE=1 SV=3	82209.4	67.42+-0.0	2.0+-0.0	1	409945	211927	15684.2	13914.5	67.	BRSK2_HUMAN	4.13487e-05	2.32042e-05	1.8885e-05	1.67357e-05		1.28882	0.711179	1.81223
	PMS1_HUMAN	PMS1 protein homolog 1 OS=Homo sapiens OX=9606 GN=PMS1 PE=1 SV=1	106619	135.96+-34.24	3.2+-0.98	4	1486038	875421	69814.1	43641.7	135	PMS1_HUMAN	0.000149888	9.58512e-05	8.40614e-05	5.24903e-05		1.28561	0.714387	1.7996
	EST1A_HUMAN	Telomerase-binding protein EST1A OS=Homo sapiens OX=9606 GN=SMG6 PE=1 SV=2	161503	243.16+-159.42	4.5+-2.5	2	1.93141e+06	286008	104496	0	243	EST1A_HUMAN	0.000194809	3.13155e-05	0.000125821	0		1.285	0.715002	1.79719
	ORC2_HUMAN	Origin recognition complex subunit 2 OS=Homo sapiens OX=9606 GN=ORC2 PE=1 SV=2	65987.9	785.44+-24.55	17.8+-3.25	4	18816651	1.69233e+07	940453	794383	785	ORC2_HUMAN	0.00189792	0.00185296	0.00113238	0.000955448		1.28483	0.715167	1.79655
	RIOX2_HUMAN	Ribosomal oxygenase 2 OS=Homo sapiens OX=9606 GN=RIOX2 PE=1 SV=1	53109.2	135.75+-30.85	2.8+-0.83	3	1.12945e+06	974959	41733	60364.5	135	RIOX2_HUMAN	0.000113921	0.00010675	5.02497e-05	7.26037e-05		1.28475	0.715253	1.79621
	SP1_HUMAN	Transcription factor Sp1 OS=Homo sapiens OX=9606 GN=SP1 PE=1 SV=3	81270.8	85.13+-0.0	4.0+-0.0	1	261245	339630	0	29883.9	85.	SP1_HUMAN	2.63502e-05	3.71867e-05	0	3.5943e-05		1.27738	0.722619	1.76771
	TOP3B_HUMAN	DNA topoisomerase 3-beta-1 OS=Homo sapiens OX=9606 GN=TOP3B PE=1 SV=1	98537.9	234.05+-34.16	5.8+-1.17	4	3028570	2.51501e+06	114590	160737	234	TOP3B_HUMAN	0.000305474	0.000275372	0.000137975	0.000193327		1.27358	0.726421	1.75323
	CIKS_HUMAN	Adapter protein CIKS OS=Homo sapiens OX=9606 GN=TRAF3IP2 PE=1 SV=3	65081.6	127.18+-88.42	2.6+-0.8	4	743640	1.7695e+06	72294.7	55719.2	127	CIKS_HUMAN	7.50065e-05	0.000193746	8.70483e-05	6.70166e-05		1.27125	0.728755	1.74441
	KT3K_HUMAN	Ketosamine-3-kinase OS=Homo sapiens OX=9606 GN=FN3KRP PE=1 SV=2	34618.3	108.44+-16.42	2.5+-0.5	3	472518	680622	18950.6	39543.3	108	KT3K_HUMAN	4.76601e-05	7.45224e-05	2.28179e-05	4.75609e-05		1.26902	0.730976	1.73607
	SMCA1_HUMAN	Probable global transcription activator SNF2L1 OS=Homo sapiens OX=9606 GN=SMARCA1 PE=1 SV=2	123211	245.89+-44.9	5.8+-0.98	4	4.39575e+06	4.52485e+06	174230	275383	245	SMCA1_HUMAN	0.000443373	0.000495433	0.000209786	0.000331218		1.26882	0.731181	1.7353
	ECM29_HUMAN	Proteasome adapter and scaffold protein ECM29 OS=Homo sapiens OX=9606 GN=ECPAS PE=1 SV=2	205985	106.73+-19.39	2.0+-0.0	2	129318	143501	7180.68	6608.88	106	ECM29_HUMAN	1.30436e-05	1.57121e-05	8.64608e-06	7.94886e-06		1.26815	0.731851	1.7328
	OPHN1_HUMAN	Oligophrenin-1 OS=Homo sapiens OX=9606 GN=OPHN1 PE=1 SV=1	92210.1	108.88+-25.6	2.2+-0.4	4	1.05041e+06	1.23357e+06	45878.3	70282.3	108	OPHN1_HUMAN	0.000105949	0.000135065	5.52409e-05	8.45324e-05		1.26587	0.734129	1.72432
	R51A1_HUMAN	RAD51-associated protein 1 OS=Homo sapiens OX=9606 GN=RAD51AP1 PE=1 SV=1	38662	115.43+-28.29	2.8+-0.4	4	1.47783e+06	1.44062e+06	45555.8	102332	115	R51A1_HUMAN	0.00014906	0.000157736	5.48525e-05	0.00012308		1.26585	0.734155	1.72422
	CHD8_HUMAN	Chromodomain-helicase-DNA-binding protein 8 OS=Homo sapiens OX=9606 GN=CHD8 PE=1 SV=5	292162	2067.77+-382.47	46.6+-13.98	4	3.59252e+07	3.22796e+07	1.7269e+06	1.72767e+06	206	CHD8_HUMAN	0.00362356	0.00353434	0.00207932	0.00207796		1.26518	0.734815	1.72177
	TARA_HUMAN	TRIO and F-actin-binding protein OS=Homo sapiens OX=9606 GN=TRIOBP PE=1 SV=3	264125	109.88+-0.0	2.0+-0.0	1	0	425587	12401.6	10186.1	109	TARA_HUMAN	0	4.65981e-05	1.49325e-05	1.22514e-05		1.26313	0.736871	1.71418
	CARD6_HUMAN	Caspase recruitment domain-containing protein 6 OS=Homo sapiens OX=9606 GN=CARD6 PE=1 SV=2	117705	256.95+-0.0	3.0+-0.0	1	462554	619673	25819.1	29829.7	256	CARD6_HUMAN	4.66551e-05	6.78489e-05	3.10881e-05	3.58779e-05		1.26196	0.738039	1.70988
	ERCC6_HUMAN	DNA excision repair protein ERCC-6 OS=Homo sapiens OX=9606 GN=ERCC6 PE=1 SV=1	169452	239.21+-50.84	5.4+-1.5	4	1.82729e+06	2.63021e+06	89030.5	141164	239	ERCC6_HUMAN	0.000184308	0.000287986	0.000107199	0.000169786		1.26066	0.739338	1.70512
	CND1_HUMAN	Condensin complex subunit 1 OS=Homo sapiens OX=9606 GN=NCAPD2 PE=1 SV=3	158508	163.34+-47.63	2.6+-0.49	4	1.67237e+06	836954	53262.6	74389.3	163	CND1_HUMAN	0.000168682	9.16394e-05	6.41321e-05	8.94721e-05		1.25782	0.742183	1.69475
	I2BP2_HUMAN	Interferon regulatory factor 2-binding protein 2 OS=Homo sapiens OX=9606 GN=IRF2BP2 PE=1 SV=2	61727.9	467.39+-0.0	7.0+-0.0	1	1.47828e+06	144567	0	81071.7	467	I2BP2_HUMAN	0.000149105	1.58289e-05	0	9.75094e-05		1.25691	0.743089	1.69147
	PKHA6_HUMAN	Pleckstrin homology domain-containing family A member 6 OS=Homo sapiens OX=9606 GN=PLEKHA6 PE=1 SV=4	117398	99.1+-36.01	3.0+-1.1	4	1.74991e+06	1.69938e+06	111018	67839.6	99.	PKHA6_HUMAN	0.000176503	0.000186067	0.000133674	8.15944e-05		1.25492	0.74508	1.68428
	VPS11_HUMAN	Vacuolar protein sorting-associated protein 11 homolog OS=Homo sapiens OX=9606 GN=VPS11 PE=1 SV=1	109080	436.01+-54.2	8.0+-0.89	4	6.43701e+06	4.52445e+06	264240	301160	436	VPS11_HUMAN	0.000649262	0.00049539	0.000318164	0.000362221		1.25439	0.745613	1.68236
	RPGF6_HUMAN	Rap guanine nucleotide exchange factor 6 OS=Homo sapiens OX=9606 GN=RAPGEF6 PE=1 SV=2	180850	420.42+-48.62	8.2+-0.98	4	1.92907e+06	2.76654e+06	109950	137536	420	RPGF6_HUMAN	0.000194573	0.000302913	0.000132388	0.000165422		1.25107	0.748929	1.67048
	DBR1_HUMAN	Lariat debranching enzyme OS=Homo sapiens OX=9606 GN=DBR1 PE=1 SV=2	62143.5	264.43+-139.94	5.0+-2.53	4	4.87089e+06	6.79385e+06	331232	283181	264	DBR1_HUMAN	0.000491297	0.00074387	0.000398828	0.000340597		1.25106	0.748939	1.67044
	CPSF5_HUMAN	Cleavage and polyadenylation specificity factor subunit 5 OS=Homo sapiens OX=9606 GN=NUDT21 PE=1 SV=1	26267.8	435.67+-32.52	14.0+-0.63	4	3.51e+07	2.87277e+07	1.42638e+06	1.92052e+06	435	CPSF5_HUMAN	0.00354032	0.00314544	0.00171747	0.00230992		1.24814	0.751859	1.66007
	MED4_HUMAN	Mediator of RNA polymerase II transcription subunit 4 OS=Homo sapiens OX=9606 GN=MED4 PE=1 SV=1	29783.9	342.88+-33.67	6.4+-1.02	4	3.33062e+06	3.30976e+06	120878	229593	342	MED4_HUMAN	0.00033594	0.000362391	0.000145546	0.000276144		1.247	0.753004	1.65603
	CAR10_HUMAN	Caspase recruitment domain-containing protein 10 OS=Homo sapiens OX=9606 GN=CARD10 PE=1 SV=2	117342	136.07+-39.42	2.4+-0.8	4	1236519	1.24522e+06	61987.3	69070.4	136	CAR10_HUMAN	0.00012472	0.000136341	7.46374e-05	8.30748e-05		1.24679	0.753211	1.6553
	TENS3_HUMAN	Tensin-3 OS=Homo sapiens OX=9606 GN=TNS3 PE=1 SV=2	156366	437.64+-133.09	9.2+-1.47	4	7.01983e+06	3.57876e+06	348441	204361	437	TENS3_HUMAN	0.000708048	0.000391844	0.000419549	0.000245796		1.24617	0.753831	1.65311
	GTSE1_HUMAN	G2 and S phase-expressed protein 1 OS=Homo sapiens OX=9606 GN=GTSE1 PE=1 SV=3	77110.7	159.4+-42.82	2.6+-0.8	4	1.94279e+06	408025	73896.4	47496.1	159	GTSE1_HUMAN	0.000195958	4.46753e-05	8.89767e-05	5.71262e-05		1.24443	0.755569	1.64701
	ELF1_HUMAN	ETS-related transcription factor Elf-1 OS=Homo sapiens OX=9606 GN=ELF1 PE=1 SV=2	67684.2	163.8+-116.19	3.2+-1.47	4	2.1487e+06	859145	100981	56553	163	ELF1_HUMAN	0.000216726	9.40691e-05	0.000121588	6.80195e-05		1.24218	0.75782	1.63915
	WRIP1_HUMAN	ATPase WRNIP1 OS=Homo sapiens OX=9606 GN=WRNIP1 PE=1 SV=2	72829.1	306.33+-23.17	5.8+-0.4	4	5.3003e+06	5.03295e+06	351875	202254	306	WRIP1_HUMAN	0.000534609	0.000551065	0.000423684	0.000243262		1.23892	0.761084	1.62783
	P2R3B_HUMAN	Serine/threonine-protein phosphatase 2A regulatory subunit B'' subunit beta OS=Homo sapiens OX=9606 GN=PPP2R3B PE=1 SV=2	65760.5	89.49+-62.85	2.3+-0.47	2	861061	304174	1888.23	59680.4	89.	P2R3B_HUMAN	8.685e-05	3.33044e-05	2.27357e-06	7.17809e-05		1.23737	0.762627	1.62251
	MCES_HUMAN	mRNA cap guanine-N7 methyltransferase OS=Homo sapiens OX=9606 GN=RNMT PE=1 SV=1	55493.5	239.61+-93.42	6.2+-1.6	4	3.99059e+06	2.30236e+06	146163	190005	239	MCES_HUMAN	0.000402507	0.000252089	0.000175991	0.00022853		1.23612	0.763883	1.6182
	GGYF2_HUMAN	GRB10-interacting GYF protein 2 OS=Homo sapiens OX=9606 GN=GIGYF2 PE=1 SV=1	150320	350.85+-110.82	7.2+-2.71	4	4.64351e+06	3.96629e+06	302278	167494	350	GGYF2_HUMAN	0.000468363	0.000434275	0.000363965	0.000201455		1.2297	0.770296	1.5964
	CTR9_HUMAN	RNA polymerase-associated protein CTR9 homolog OS=Homo sapiens OX=9606 GN=CTR9 PE=1 SV=1	134332	148.51+-56.15	3.0+-1.0	2	467482	866256	74173.2	0	148	CTR9_HUMAN	4.71521e-05	9.48478e-05	8.93101e-05	0		1.22779	0.772211	1.58996
	MTMRD_HUMAN	Myotubularin-related protein 13 OS=Homo sapiens OX=9606 GN=SBF2 PE=1 SV=1	210385	344.83+-61.48	6.2+-0.98	4	2.60756e+06	2868867	170113	131566	344	MTMRD_HUMAN	0.000263009	0.000314117	0.000204829	0.000158242		1.22767	0.772329	1.58957
	HMMR_HUMAN	Hyaluronan mediated motility receptor OS=Homo sapiens OX=9606 GN=HMMR PE=1 SV=2	84447.9	590.05+-82.94	11.6+-2.65	4	8.11724e+06	9.40054e+06	542800	424460	590	HMMR_HUMAN	0.000818737	0.00102928	0.000653572	0.000510521		1.22706	0.772942	1.58752
	LSG1_HUMAN	Large subunit GTPase 1 homolog OS=Homo sapiens OX=9606 GN=LSG1 PE=1 SV=2	75862.6	265.67+-28.1	6.4+-1.02	4	5.43838e+06	4248299	234418	296834	265	LSG1_HUMAN	0.000548536	0.000465153	0.000282257	0.000357018		1.22651	0.773489	1.58569
	ARFG2_HUMAN	ADP-ribosylation factor GTPase-activating protein 2 OS=Homo sapiens OX=9606 GN=ARFGAP2 PE=1 SV=1	57027.3	157.79+-37.11	2.6+-0.49	4	1.20286e+06	839314	63092.8	48763.9	157	ARFG2_HUMAN	0.000121326	9.18978e-05	7.59684e-05	5.8651e-05		1.22598	0.774025	1.5839
	MED14_HUMAN	Mediator of RNA polymerase II transcription subunit 14 OS=Homo sapiens OX=9606 GN=MED14 PE=1 SV=2	161987	222.54+-64.17	4.2+-1.17	4	1.62121e+06	1.51719e+06	115962	57988.8	222	MED14_HUMAN	0.000163522	0.000166119	0.000139626	6.97463e-05		1.22313	0.776873	1.57442
	EXOC8_HUMAN	Exocyst complex component 8 OS=Homo sapiens OX=9606 GN=EXOC8 PE=1 SV=2	82431.7	90.08+-31.75	2.3+-0.43	3	1.11621e+06	846368	0	109249	90.	EXOC8_HUMAN	0.000112585	9.26702e-05	0	0.0001314		1.21938	0.780622	1.56206
	SAPC2_HUMAN	Suppressor APC domain-containing protein 2 OS=Homo sapiens OX=9606 GN=SAPCD2 PE=1 SV=2	43066.3	240.88+-34.74	4.8+-0.4	4	958323	2.29263e+06	84010.2	101195	240	SAPC2_HUMAN	9.66602e-05	0.000251024	0.000101155	0.000121713		1.21876	0.781235	1.56005
	VWA8_HUMAN	von Willebrand factor A domain-containing protein 8 OS=Homo sapiens OX=9606 GN=VWA8 PE=1 SV=2	215716	141.84+-30.6	3.0+-0.0	2	785703	689075	41104	42123.6	141	VWA8_HUMAN	7.92491e-05	7.54478e-05	4.94923e-05	5.06644e-05		1.21401	0.785994	1.54455
	ZN207_HUMAN	BUB3-interacting and GLEBS motif-containing protein ZNF207 OS=Homo sapiens OX=9606 GN=ZNF207 PE=1 SV=1	51002.2	118.57+-18.28	3.6+-0.8	4	5.98908e+06	5554902	411397	243568	118	ZN207_HUMAN	0.000604082	0.000608215	0.000495353	0.000292953		1.21193	0.788068	1.53785
	ZN598_HUMAN	E3 ubiquitin-protein ligase ZNF598 OS=Homo sapiens OX=9606 GN=ZNF598 PE=1 SV=1	100400	561.88+-142.32	11.6+-2.06	4	7.24976e+06	8.28012e+06	366611	532218	561	ZN598_HUMAN	0.00073124	0.000906603	0.000441427	0.000640128		1.20456	0.795437	1.51434
	TENS1_HUMAN	Tensin-1 OS=Homo sapiens OX=9606 GN=TNS1 PE=1 SV=2	186499	1132.56+-350.84	23.8+-7.3	4	2.09477e+07	1.56005e+07	1.30416e+06	804705	113	TENS1_HUMAN	0.00211287	0.00170812	0.00157031	0.000967863		1.20173	0.798273	1.50541
	STK25_HUMAN	Serine/threonine-protein kinase 25 OS=Homo sapiens OX=9606 GN=STK25 PE=1 SV=1	48309.9	85.97+-1.77	2.0+-0.0	2	289456	233577	30534.3	0	85.	STK25_HUMAN	2.91957e-05	2.55747e-05	3.67655e-05	0		1.1967	0.803303	1.48972
	KLC1_HUMAN	Kinesin light chain 1 OS=Homo sapiens OX=9606 GN=KLC1 PE=1 SV=2	65782.1	260.42+-76.16	6.0+-1.9	4	1.05896e+07	3.79023e+06	512509	314888	260	KLC1_HUMAN	0.00106811	0.000414998	0.0006171	0.000378733		1.19656	0.803435	1.48931
	WEE1_HUMAN	Wee1-like protein kinase OS=Homo sapiens OX=9606 GN=WEE1 PE=1 SV=2	72236.9	188.23+-27.76	2.8+-0.98	4	1.01087e+06	691912	16200.8	83289.9	188	WEE1_HUMAN	0.00010196	7.57585e-05	1.95069e-05	0.000100177		1.19514	0.804862	1.4849
	TANC2_HUMAN	Protein TANC2 OS=Homo sapiens OX=9606 GN=TANC2 PE=1 SV=3	220995	128.57+-41.69	2.0+-0.0	3	78539.1	723868	24608.7	24229.5	128	TANC2_HUMAN	7.92176e-06	7.92574e-05	2.96308e-05	2.91422e-05		1.19463	0.805373	1.48332
	SHPRH_HUMAN	E3 ubiquitin-protein ligase SHPRH OS=Homo sapiens OX=9606 GN=SHPRH PE=1 SV=2	195580	349.66+-43.72	6.0+-0.89	4	2130930	1.62258e+06	107746	112258	349	SHPRH_HUMAN	0.000214934	0.000177658	0.000129734	0.000135019		1.19448	0.805522	1.48286
	KCD15_HUMAN	BTB/POZ domain-containing protein KCTD15 OS=Homo sapiens OX=9606 GN=KCTD15 PE=1 SV=1	32264.3	106.18+-27.38	2.3+-0.43	3	1865470	978785	88904.9	77305	106	KCD15_HUMAN	0.000188159	0.000107169	0.000107048	9.2979e-05		1.19239	0.807612	1.47644
	CPSF1_HUMAN	Cleavage and polyadenylation specificity factor subunit 1 OS=Homo sapiens OX=9606 GN=CPSF1 PE=1 SV=2	162036	358.0+-122.88	7.4+-3.07	4	3.95188e+06	3.79078e+06	314220	144652	358	CPSF1_HUMAN	0.000398602	0.000415058	0.000378344	0.000173981		1.19132	0.808684	1.47315
	INT6_HUMAN	Integrator complex subunit 6 OS=Homo sapiens OX=9606 GN=INTS6 PE=1 SV=1	100954	193.79+-66.46	3.4+-0.8	4	296208	1.05348e+06	44519.9	37564.7	193	INT6_HUMAN	2.98767e-05	0.000115347	5.36052e-05	4.51811e-05		1.19031	0.80969	1.47008
	CSTF1_HUMAN	Cleavage stimulation factor subunit 1 OS=Homo sapiens OX=9606 GN=CSTF1 PE=1 SV=1	49125	92.54+-14.19	2.0+-0.0	2	984705	159413	0	66153	92.	CSTF1_HUMAN	9.93213e-05	1.74544e-05	0	7.95659e-05		1.18952	0.810484	1.46766
	TRIM2_HUMAN	Tripartite motif-containing protein 2 OS=Homo sapiens OX=9606 GN=TRIM2 PE=1 SV=1	82505.5	113.66+-62.6	2.5+-0.5	2	1052293	523395	26264.9	66640.9	113	TRIM2_HUMAN	0.000106138	5.73073e-05	3.16249e-05	8.01527e-05		1.18773	0.812268	1.46224
	VINEX_HUMAN	Vinexin OS=Homo sapiens OX=9606 GN=SORBS3 PE=1 SV=2	75523	156.58+-33.03	3.4+-0.49	4	1.99113e+06	2.19001e+06	162307	89097.8	156	VINEX_HUMAN	0.000200833	0.000239788	0.00019543	0.000107163		1.18572	0.814282	1.45615
	NRDE2_HUMAN	Nuclear exosome regulator NRDE2 OS=Homo sapiens OX=9606 GN=NRDE2 PE=1 SV=3	133844	250.28+-25.59	5.2+-0.4	4	2.58582e+06	2.5068e+06	138207	170816	250	NRDE2_HUMAN	0.000260816	0.000274473	0.000166411	0.00020545		1.18015	0.819845	1.43948
	NFIC_HUMAN	Nuclear factor 1 C-type OS=Homo sapiens OX=9606 GN=NFIC PE=1 SV=2	56096.2	581.3+-77.6	15.8+-4.07	4	3.90851e+06	1.0457e+07	399177	490059	581	NFIC_HUMAN	0.000394228	0.00114495	0.000480639	0.000589421		1.17979	0.820209	1.4384
	DPOLA_HUMAN	DNA polymerase alpha catalytic subunit OS=Homo sapiens OX=9606 GN=POLA1 PE=1 SV=2	167575	84.64+-26.95	3.0+-0.71	3	253110	443996	7194.75	35814	84.	DPOLA_HUMAN	2.55297e-05	4.86139e-05	8.66302e-06	4.30754e-05		1.17799	0.822015	1.43305
	RIF1_HUMAN	Telomere-associated protein RIF1 OS=Homo sapiens OX=9606 GN=RIF1 PE=1 SV=2	276461	333.83+-108.54	8.0+-2.68	4	4.29261e+06	2.23365e+06	130121	263698	333	RIF1_HUMAN	0.00043297	0.000244566	0.000156675	0.000317165		1.17691	0.823085	1.42988
	ODFP2_HUMAN	Outer dense fiber protein 2 OS=Homo sapiens OX=9606 GN=ODF2 PE=1 SV=1	96140.2	147.44+-30.94	2.3+-0.43	3	355821	348587	13195.2	30282.4	147	ODFP2_HUMAN	3.58895e-05	3.81674e-05	1.5888e-05	3.64223e-05		1.17209	0.827911	1.41572
	DIP2A_HUMAN	Disco-interacting protein 2 homolog A OS=Homo sapiens OX=9606 GN=DIP2A PE=1 SV=2	172371	177.47+-20.74	4.6+-1.02	4	2.50446e+06	3.59742e+06	204785	176427	177	DIP2A_HUMAN	0.000252609	0.000393887	0.000246576	0.000212198		1.16984	0.830158	1.40918
	KIF4A_HUMAN	Chromosome-associated kinesin KIF4A OS=Homo sapiens OX=9606 GN=KIF4A PE=1 SV=3	141390	878.07+-243.26	20.0+-5.8	4	9.91107e+06	11010726	638878	661982	878	KIF4A_HUMAN	0.000999669	0.00120558	0.000769257	0.000796203		1.16967	0.830326	1.40869
	VPS39_HUMAN	Vam6/Vps39-like protein OS=Homo sapiens OX=9606 GN=VPS39 PE=1 SV=2	102885	376.12+-43.28	9.8+-1.33	4	6.66868e+06	6.47219e+06	331416	483540	376	VPS39_HUMAN	0.000672629	0.000708651	0.00039905	0.000581581		1.16963	0.830371	1.40856
	RBM26_HUMAN	RNA-binding protein 26 OS=Homo sapiens OX=9606 GN=RBM26 PE=1 SV=3	113927	1126.58+-245.34	27.0+-5.44	4	1.77909e+07	1.81323e+07	1.08932e+06	1.14128e+06	112	RBM26_HUMAN	0.00179446	0.00198534	0.00131163	0.00137268		1.16947	0.830526	1.40811
	TYY2_HUMAN	Transcription factor YY2 OS=Homo sapiens OX=9606 GN=YY2 PE=2 SV=1	41834.3	143.63+-6.85	10.2+-2.4	4	1.34313e+07	1.85404e+07	1.05424e+06	955358	143	TYY2_HUMAN	0.00135474	0.00203001	0.00126938	0.00114906		1.16651	0.833486	1.39956
	WDR18_HUMAN	WD repeat-containing protein 18 OS=Homo sapiens OX=9606 GN=WDR18 PE=1 SV=2	48059.3	156.26+-30.99	3.4+-1.02	4	1.37752e+06	1.94529e+06	87239.5	121896	156	WDR18_HUMAN	0.000138942	0.000212993	0.000105043	0.000146611		1.16614	0.833859	1.39849
	KLC2_HUMAN	Kinesin light chain 2 OS=Homo sapiens OX=9606 GN=KLC2 PE=1 SV=1	69291.4	339.87+-40.36	7.4+-0.8	4	2.27342e+06	1.63845e+06	173923	70561.6	339	KLC2_HUMAN	0.000229307	0.000179397	0.000209416	8.48684e-05		1.16276	0.837239	1.3888
	IRAK1_HUMAN	Interleukin-1 receptor-associated kinase 1 OS=Homo sapiens OX=9606 GN=IRAK1 PE=1 SV=2	77457.9	271.44+-57.11	5.0+-1.55	4	2.25728e+06	1.62439e+06	142423	100752	271	IRAK1_HUMAN	0.000227678	0.000177857	0.000171489	0.00012118		1.16165	0.838348	1.38564
	CYFP1_HUMAN	Cytoplasmic FMR1-interacting protein 1 OS=Homo sapiens OX=9606 GN=CYFIP1 PE=1 SV=1	146742	663.86+-51.45	14.2+-2.14	4	3.84387e+06	4.02299e+06	263174	237645	663	CYFP1_HUMAN	0.000387708	0.000440483	0.000316881	0.000285828		1.15758	0.84242	1.37411
	SMRD1_HUMAN	SWI/SNF-related matrix-associated actin-dependent regulator of chromatin subfamily D member 1 OS=Homo sapiens OX=9606 GN=SMARCD1 PE=1 SV=2	58481	227.15+-106.72	4.2+-2.4	4	2.95978e+06	770416	45973.8	185988	227	SMRD1_HUMAN	0.000298535	8.4354e-05	5.53559e-05	0.000223697		1.15687	0.843135	1.3721
	TF3C3_HUMAN	General transcription factor 3C polypeptide 3 OS=Homo sapiens OX=9606 GN=GTF3C3 PE=1 SV=1	102006	670.95+-111.32	12.8+-2.32	4	6.55556e+06	6.90199e+06	337886	523762	670	TF3C3_HUMAN	0.000661219	0.000755709	0.00040684	0.000629958		1.15492	0.84508	1.36664
	F117B_HUMAN	Protein FAM117B OS=Homo sapiens OX=9606 GN=FAM117B PE=1 SV=2	62500.3	236.19+-59.2	5.8+-1.6	4	2.38413e+06	2.39369e+06	116259	190013	236	F117B_HUMAN	0.000240473	0.000262088	0.000139985	0.00022854		1.15387	0.846127	1.36371
	CDT1_HUMAN	DNA replication factor Cdt1 OS=Homo sapiens OX=9606 GN=CDT1 PE=1 SV=3	60922.7	195.78+-35.13	4.2+-0.98	4	2356643	2.46636e+06	135992	174770	195	CDT1_HUMAN	0.0002377	0.000270046	0.000163744	0.000210206		1.15175	0.848252	1.35779
	SNPC1_HUMAN	snRNA-activating protein complex subunit 1 OS=Homo sapiens OX=9606 GN=SNAPC1 PE=1 SV=1	43195.3	159.94+-13.5	2.5+-0.5	2	672654	1.15728e+06	91490.2	27919.9	159	SNPC1_HUMAN	6.78465e-05	0.000126712	0.000110161	3.35808e-05		1.15021	0.849788	1.35353
	ESCO1_HUMAN	N-acetyltransferase ESCO1 OS=Homo sapiens OX=9606 GN=ESCO1 PE=1 SV=3	96120.9	351.53+-60.99	8.0+-0.89	4	4.5296e+06	2.68287e+06	310966	151240	351	ESCO1_HUMAN	0.000456873	0.000293752	0.000374426	0.000181905		1.14866	0.851339	1.34924
	T2EB_HUMAN	Transcription initiation factor IIE subunit beta OS=Homo sapiens OX=9606 GN=GTF2E2 PE=1 SV=1	33080.4	399.79+-41.79	8.8+-1.17	4	4.62467e+06	3.81907e+06	226192	321384	399	T2EB_HUMAN	0.000466463	0.000418155	0.000272352	0.000386546		1.14624	0.853762	1.34257
	RGPD3_HUMAN	RanBP2-like and GRIP domain-containing protein 3 OS=Homo sapiens OX=9606 GN=RGPD3 PE=3 SV=2	198732	177.63+-32.99	4.8+-0.43	3	4.602e+06	4.2066e+06	0	573610	177	RGPD3_HUMAN	0.000464175	0.000460587	0	0.000689912		1.14545	0.854552	1.34041
	EHMT1_HUMAN	Histone-lysine N-methyltransferase EHMT1 OS=Homo sapiens OX=9606 GN=EHMT1 PE=1 SV=4	144000	106.14+-7.53	2.4+-0.49	4	444044	690930	36909.6	39210.2	106	EHMT1_HUMAN	4.4788e-05	7.5651e-05	4.44419e-05	4.71602e-05		1.136	0.864004	1.3148
	PI3R4_HUMAN	Phosphoinositide 3-kinase regulatory subunit 4 OS=Homo sapiens OX=9606 GN=PIK3R4 PE=1 SV=3	154318	271.44+-63.73	5.6+-1.2	4	2.70661e+06	1.24823e+06	143909	115166	271	PI3R4_HUMAN	0.000273	0.000136671	0.000173278	0.000138517		1.13566	0.864337	1.31391
	TLE3_HUMAN	Transducin-like enhancer protein 3 OS=Homo sapiens OX=9606 GN=TLE3 PE=1 SV=2	84162.4	203.39+-111.6	5.2+-3.19	4	2316554	819766	101027	105246	203	TLE3_HUMAN	0.000233657	8.97575e-05	0.000121644	0.000126585		1.13152	0.868475	1.30289
	DPOLL_HUMAN	DNA polymerase lambda OS=Homo sapiens OX=9606 GN=POLL PE=1 SV=1	64069.9	213.5+-38.54	4.2+-1.6	4	2.68023e+06	1.98305e+06	178424	134255	213	DPOLL_HUMAN	0.000270339	0.000217127	0.000214835	0.000161476		1.12868	0.871316	1.29538
	ABL2_HUMAN	Tyrosine-protein kinase ABL2 OS=Homo sapiens OX=9606 GN=ABL2 PE=1 SV=1	129289	601.5+-159.29	11.6+-4.22	4	4.95788e+06	5.25614e+06	414581	276338	601	ABL2_HUMAN	0.000500072	0.000575503	0.000499187	0.000332367		1.12795	0.872048	1.29345
	DLGP5_HUMAN	Disks large-associated protein 5 OS=Homo sapiens OX=9606 GN=DLGAP5 PE=1 SV=2	95739.9	257.58+-74.76	5.4+-0.8	4	2.79175e+06	3.43561e+06	218973	203937	257	DLGP5_HUMAN	0.000281587	0.000376171	0.00026366	0.000245287		1.12755	0.872451	1.29239
	MTOR_HUMAN	Serine/threonine-protein kinase mTOR OS=Homo sapiens OX=9606 GN=MTOR PE=1 SV=1	290759	279.5+-101.94	5.8+-1.6	4	2.51284e+06	514634	92387.6	107588	279	MTOR_HUMAN	0.000253455	5.63481e-05	0.000111242	0.000129403		1.12564	0.874358	1.28739
	ELOB_HUMAN	Elongin-B OS=Homo sapiens OX=9606 GN=ELOB PE=1 SV=1	13238.6	124.19+-23.68	4.2+-0.75	4	2.03338e+06	1.82294e+06	92147.9	169993	124	ELOB_HUMAN	0.000205095	0.000199596	0.000110953	0.00020446		1.12398	0.876021	1.28305
	CDC23_HUMAN	Cell division cycle protein 23 homolog OS=Homo sapiens OX=9606 GN=CDC23 PE=1 SV=3	69588.3	122.94+-53.04	4.2+-0.75	4	514514	2.34332e+06	104250	95979.7	122	CDC23_HUMAN	5.1896e-05	0.000256574	0.000125525	0.00011544		1.12286	0.877138	1.28014
	JUPI2_HUMAN	Jupiter microtubule associated homolog 2 OS=Homo sapiens OX=9606 GN=JPT2 PE=1 SV=1	20108	192.14+-52.15	4.6+-1.2	4	1.58982e+06	2.08974e+06	110325	142377	192	JUPI2_HUMAN	0.000160356	0.000228809	0.000132839	0.000171245		1.12273	0.877273	1.27979
	MORC3_HUMAN	MORC family CW-type zinc finger protein 3 OS=Homo sapiens OX=9606 GN=MORC3 PE=1 SV=3	108243	409.1+-74.54	10.2+-1.6	4	4.08515e+06	4.85712e+06	238778	376694	409	MORC3_HUMAN	0.000412044	0.000531813	0.000287507	0.000453071		1.12068	0.879318	1.27449
	SNX27_HUMAN	Sorting nexin-27 OS=Homo sapiens OX=9606 GN=SNX27 PE=1 SV=2	61853.7	278.16+-109.22	6.6+-2.58	4	5.00234e+06	5.99444e+06	296956	461213	278	SNX27_HUMAN	0.000504556	0.000656341	0.000357557	0.000554726		1.11992	0.880081	1.27252
	SKA1_HUMAN	Spindle and kinetochore-associated protein 1 OS=Homo sapiens OX=9606 GN=SKA1 PE=1 SV=1	29807.5	176.69+-47.84	5.0+-0.63	4	1.44248e+06	3.40173e+06	175809	162867	176	SKA1_HUMAN	0.000145494	0.000372461	0.000211687	0.000195889		1.11926	0.880741	1.27082
	EHBP1_HUMAN	EH domain-binding protein 1 OS=Homo sapiens OX=9606 GN=EHBP1 PE=1 SV=3	140559	85.7+-0.0	2.0+-0.0	1	609605	81142.3	0	46091.1	85.	EHBP1_HUMAN	6.14872e-05	8.8844e-06	0	5.54363e-05		1.11871	0.881285	1.26941
	GTPB2_HUMAN	GTP-binding protein 2 OS=Homo sapiens OX=9606 GN=GTPBP2 PE=1 SV=1	66468.3	348.22+-82.27	6.4+-1.5	4	3.43652e+06	3.79745e+06	256721	244090	348	GTPB2_HUMAN	0.000346621	0.000415789	0.000309111	0.00029358		1.117	0.882999	1.26501
	MSH3_HUMAN	DNA mismatch repair protein Msh3 OS=Homo sapiens OX=9606 GN=MSH3 PE=1 SV=4	128301	159.38+-40.97	3.6+-0.49	4	1.29347e+06	1.23443e+06	125409	49264	159	MSH3_HUMAN	0.000130465	0.00013516	0.000151001	5.92526e-05		1.11636	0.883644	1.26335
	TRRAP_HUMAN	Transformation/transcription domain-associated protein OS=Homo sapiens OX=9606 GN=TRRAP PE=1 SV=3	441766	257.22+-88.84	4.6+-1.36	4	2.28406e+06	1.75207e+06	102265	176338	257	TRRAP_HUMAN	0.000230379	0.000191836	0.000123134	0.000212092		1.11485	0.885154	1.2595
	ORC1_HUMAN	Origin recognition complex subunit 1 OS=Homo sapiens OX=9606 GN=ORC1 PE=1 SV=2	98372	243.34+-80.14	4.8+-1.6	4	3.95158e+06	3.10269e+06	275702	212868	243	ORC1_HUMAN	0.000398572	0.000339718	0.000331965	0.000256028		1.11332	0.886678	1.25561
	RTRAF_HUMAN	RNA transcription, translation and transport factor protein OS=Homo sapiens OX=9606 GN=RTRAF PE=1 SV=1	28164.8	712.26+-117.16	18.2+-1.17	4	1.42799e+07	1.14499e+07	1.02655e+06	758303	712	RTRAF_HUMAN	0.00144032	0.00125367	0.00123604	0.000912052		1.11274	0.887259	1.25413
	CTRO_HUMAN	Citron Rho-interacting kinase OS=Homo sapiens OX=9606 GN=CIT PE=1 SV=2	233339	702.69+-30.78	13.2+-0.4	4	1.00731e+07	8.7042e+06	665386	664233	702	CTRO_HUMAN	0.00101601	0.000953037	0.000801175	0.000798909		1.10338	0.896624	1.23059
	P5CR3_HUMAN	Pyrroline-5-carboxylate reductase 3 OS=Homo sapiens OX=9606 GN=PYCR3 PE=1 SV=3	29158.1	118.73+-18.34	2.0+-0.0	2	410295	1.03863e+06	0	104924	118	P5CR3_HUMAN	4.1384e-05	0.000113721	0	0.000126198		1.10276	0.897237	1.22907
	SETX_HUMAN	Probable helicase senataxin OS=Homo sapiens OX=9606 GN=SETX PE=1 SV=4	307022	146.51+-33.98	3.0+-0.63	4	1.30871e+06	691521	78488.2	62322.8	146	SETX_HUMAN	0.000132002	7.57157e-05	9.45056e-05	7.49591e-05		1.10142	0.898583	1.22573
	PB1_HUMAN	Protein polybromo-1 OS=Homo sapiens OX=9606 GN=PBRM1 PE=1 SV=1	194080	306.3+-35.08	7.8+-0.98	4	3.4076e+06	2.16416e+06	195824	200110	306	PB1_HUMAN	0.000343704	0.000236957	0.000235787	0.000240684		1.09856	0.901441	1.21867
	CNN2_HUMAN	Calponin-2 OS=Homo sapiens OX=9606 GN=CNN2 PE=1 SV=4	34074.4	228.92+-28.04	4.6+-0.8	4	3.34275e+06	3.34995e+06	258538	237982	228	CNN2_HUMAN	0.000337163	0.000366791	0.000311299	0.000286234		1.08177	0.918231	1.1781
	DMD_HUMAN	Dystrophin OS=Homo sapiens OX=9606 GN=DMD PE=1 SV=3	428537	175.75+-73.89	4.0+-1.63	3	2.12387e+06	4.24565e+06	446965	33357.4	175	DMD_HUMAN	0.000214222	0.000464863	0.000538179	4.01208e-05		1.08015	0.919845	1.17428
	CTIF_HUMAN	CBP80/20-dependent translation initiation factor OS=Homo sapiens OX=9606 GN=CTIF PE=1 SV=1	68114.6	76.35+-0.0	2.0+-0.0	1	59527.1	76844.8	7000.58	3228.48	76.	CTIF_HUMAN	6.00414e-06	8.41386e-06	8.42922e-06	3.88307e-06		1.07878	0.921224	1.17102
	SP2_HUMAN	Transcription factor Sp2 OS=Homo sapiens OX=9606 GN=SP2 PE=1 SV=3	65487.2	109.06+-51.46	2.8+-1.17	4	590568	1.03745e+06	57189.8	65762.6	109	SP2_HUMAN	5.9567e-05	0.000113591	6.88608e-05	7.90963e-05		1.07848	0.921519	1.17033
	PRC1_HUMAN	Protein regulator of cytokinesis 1 OS=Homo sapiens OX=9606 GN=PRC1 PE=1 SV=2	72245.9	713.47+-195.32	20.0+-4.1	4	1.50972e+07	1.40464e+07	950463	1.22952e+06	713	PRC1_HUMAN	0.00152276	0.00153796	0.00114443	0.00147881		1.07697	0.923032	1.16677
	LIPB2_HUMAN	Liprin-beta-2 OS=Homo sapiens OX=9606 GN=PPFIBP2 PE=1 SV=3	99052.5	146.11+-37.66	3.8+-0.75	4	1.18934e+06	1.50913e+06	109116	95006.2	146	LIPB2_HUMAN	0.000119961	0.000165237	0.000131384	0.000114269		1.07449	0.925508	1.16098
	TRI31_HUMAN	E3 ubiquitin-protein ligase TRIM31 OS=Homo sapiens OX=9606 GN=TRIM31 PE=1 SV=2	49068.6	372.92+-84.72	7.4+-1.74	4	3.23627e+06	2.84153e+06	251985	204678	372	TRI31_HUMAN	0.000326423	0.000311123	0.000303409	0.000246178		1.07409	0.925906	1.16005
	SHIP1_HUMAN	Phosphatidylinositol 3,4,5-trisphosphate 5-phosphatase 1 OS=Homo sapiens OX=9606 GN=INPP5D PE=1 SV=2	134121	190.02+-72.97	3.8+-1.47	4	1.58024e+06	421708	44079.2	103322	190	SHIP1_HUMAN	0.000159389	4.61735e-05	5.30747e-05	0.000124271		1.07369	0.926307	1.15911
	MTSS2_HUMAN	Protein MTSS 2 OS=Homo sapiens OX=9606 GN=MTSS2 PE=1 SV=1	80450.3	154.6+-46.81	2.8+-0.4	4	528043	629744	43572	44121.4	154	MTSS2_HUMAN	5.32605e-05	6.89516e-05	5.2464e-05	5.30673e-05		1.07324	0.926756	1.15806
	L2GL2_HUMAN	LLGL scribble cell polarity complex component 2 OS=Homo sapiens OX=9606 GN=LLGL2 PE=1 SV=2	114347	206.76+-21.87	4.6+-0.8	4	2.28366e+06	2.68821e+06	294314	83145.3	206	L2GL2_HUMAN	0.000230339	0.000294336	0.000354376	0.000100003		1.0718	0.928201	1.15471
	IRS2_HUMAN	Insulin receptor substrate 2 OS=Homo sapiens OX=9606 GN=IRS2 PE=1 SV=2	138446	1539.28+-178.66	34.0+-2.28	4	3.16282e+07	2.53968e+07	2.11728e+06	2.21418e+06	153	IRS2_HUMAN	0.00319014	0.00278073	0.00254936	0.00266312		1.06781	0.932185	1.1455
	HELZ2_HUMAN	Helicase with zinc finger domain 2 OS=Homo sapiens OX=9606 GN=HELZ2 PE=1 SV=6	298286	226.29+-73.51	4.8+-0.75	4	1.18351e+06	878976	68344.2	88479	226	HELZ2_HUMAN	0.000119373	9.62405e-05	8.22916e-05	0.000106419		1.06654	0.93346	1.14257
	TFR1_HUMAN	Transferrin receptor protein 1 OS=Homo sapiens OX=9606 GN=TFRC PE=1 SV=2	85274.1	245.44+-48.58	5.2+-1.47	4	2.24271e+06	1.40567e+06	93813.3	184091	245	TFR1_HUMAN	0.000226209	0.000153909	0.000112958	0.000221416		1.06402	0.935977	1.1368
	ELOC_HUMAN	Elongin-C OS=Homo sapiens OX=9606 GN=ELOC PE=1 SV=1	12636.1	153.76+-39.64	3.0+-0.82	3	1.34954e+06	1.92638e+06	152869	101201	153	ELOC_HUMAN	0.00013612	0.000210922	0.000184066	0.00012172		1.0632	0.936805	1.13492
	MARK3_HUMAN	MAP/microtubule affinity-regulating kinase 3 OS=Homo sapiens OX=9606 GN=MARK3 PE=1 SV=5	84889.3	729.57+-108.58	12.6+-2.06	4	3.39614e+06	5.90039e+06	428914	298346	729	MARK3_HUMAN	0.000342549	0.000646043	0.000516445	0.000358837		1.06079	0.939207	1.12946
	SC24B_HUMAN	Protein transport protein Sec24B OS=Homo sapiens OX=9606 GN=SEC24B PE=1 SV=2	138529	400.36+-72.02	9.4+-2.33	4	5.48556e+06	1.78981e+06	291795	261327	400	SC24B_HUMAN	0.000553295	0.000195969	0.000351344	0.000314312		1.05909	0.940909	1.1256
	AFG2H_HUMAN	ATPase family protein 2 homolog OS=Homo sapiens OX=9606 GN=SPATA5 PE=1 SV=3	98470.2	137.27+-25.41	3.0+-0.63	4	591815	951165	56446.6	65077.5	137	AFG2H_HUMAN	5.96928e-05	0.000104144	6.7966e-05	7.82723e-05		1.05676	0.943243	1.12034
	IMP3_HUMAN	U3 small nucleolar ribonucleoprotein protein IMP3 OS=Homo sapiens OX=9606 GN=IMP3 PE=1 SV=1	21950.6	90.81+-31.63	2.0+-0.0	3	500014	472086	9049.64	67130	90.	IMP3_HUMAN	5.04333e-05	5.16894e-05	1.08964e-05	8.07409e-05		1.05412	0.945885	1.11442
	CDK1_HUMAN	Cyclin-dependent kinase 1 OS=Homo sapiens OX=9606 GN=CDK1 PE=1 SV=3	34130.9	352.12+-54.67	7.8+-0.98	4	6.70022e+06	7228504	417004	679085	352	CDK1_HUMAN	0.00067581	0.00079146	0.000502104	0.000816773		1.05326	0.946739	1.11251
	RPR1B_HUMAN	Regulation of nuclear pre-mRNA domain-containing protein 1B OS=Homo sapiens OX=9606 GN=RPRD1B PE=1 SV=1	36991.2	364.32+-80.22	6.4+-0.8	4	5.52436e+06	2.93661e+06	353943	305698	364	RPR1B_HUMAN	0.000557209	0.000321535	0.000426173	0.00036768		1.05075	0.949246	1.10693
	ABCF2_HUMAN	ATP-binding cassette sub-family F member 2 OS=Homo sapiens OX=9606 GN=ABCF2 PE=1 SV=2	71814.8	684.65+-51.39	16.8+-2.23	4	1.25206e+07	10218175	781415	1.01271e+06	684	ABCF2_HUMAN	0.00126288	0.0011188	0.000940882	0.00121804		1.04906	0.95094	1.10318
	SLX4_HUMAN	Structure-specific endonuclease subunit SLX4 OS=Homo sapiens OX=9606 GN=SLX4 PE=1 SV=3	201713	102.29+-9.67	2.0+-0.0	2	211630	653614	40639.6	29847.8	102	SLX4_HUMAN	2.13458e-05	7.15652e-05	4.89331e-05	3.58996e-05		1.04545	0.954551	1.09523
	PICAL_HUMAN	Phosphatidylinositol-binding clathrin assembly protein OS=Homo sapiens OX=9606 GN=PICALM PE=1 SV=2	70881.1	175.71+-41.32	3.0+-0.0	2	0	779066	54168.1	10870.4	175	PICAL_HUMAN	0	8.53011e-05	6.52225e-05	1.30744e-05		1.04281	0.957186	1.08946
	SMCA2_HUMAN	Probable global transcription activator SNF2L2 OS=Homo sapiens OX=9606 GN=SMARCA2 PE=1 SV=2	181794	507.03+-145.03	12.6+-3.56	4	1.42385e+07	1.20109e+07	1.09506e+06	1.01305e+06	507	SMCA2_HUMAN	0.00143615	0.00131509	0.00131853	0.00121845		1.04052	0.959482	1.08446
	HKDC1_HUMAN	Hexokinase HKDC1 OS=Homo sapiens OX=9606 GN=HKDC1 PE=1 SV=3	103790	86.41+-18.54	2.3+-0.47	3	448204	501346	77051.8	0	86.	HKDC1_HUMAN	4.52077e-05	5.48931e-05	9.27761e-05	0		1.03798	0.962024	1.07895
	PQBP1_HUMAN	Polyglutamine-binding protein 1 OS=Homo sapiens OX=9606 GN=PQBP1 PE=1 SV=1	30511	175.39+-52.22	3.6+-0.8	4	4.76547e+06	2.88812e+06	324168	295061	175	PQBP1_HUMAN	0.000480664	0.000316225	0.000390323	0.000354886		1.03351	0.966487	1.06935
	MCM9_HUMAN	DNA helicase MCM9 OS=Homo sapiens OX=9606 GN=MCM9 PE=1 SV=4	128715	590.28+-96.53	12.8+-2.23	4	4.56805e+06	6696423	456462	483071	590	MCM9_HUMAN	0.000460752	0.000733202	0.000549614	0.000581016		1.02724	0.972759	1.05601
	TOPB1_HUMAN	DNA topoisomerase 2-binding protein 1 OS=Homo sapiens OX=9606 GN=TOPBP1 PE=1 SV=3	172681	1160.32+-69.19	26.8+-2.14	4	1.34314e+07	1.82642e+07	1.08351e+06	1.55766e+06	116	TOPB1_HUMAN	0.00135475	0.00199978	0.00130463	0.00187349		1.027	0.972995	1.05551
	DNMT1_HUMAN	DNA (cytosine-5)-methyltransferase 1 OS=Homo sapiens OX=9606 GN=DNMT1 PE=1 SV=2	185388	1131.55+-79.96	30.2+-3.92	4	2.62746e+07	2.32635e+07	1.82265e+06	2.28954e+06	113	DNMT1_HUMAN	0.00265016	0.00254716	0.00219461	0.00275375		1.02454	0.975462	1.05031
	PWP3A_HUMAN	PWWP domain-containing DNA repair factor 3A OS=Homo sapiens OX=9606 GN=PWWP3A PE=1 SV=3	79670.4	101.61+-22.48	2.3+-0.43	3	611095	675954	54479.2	52849.8	101	PWP3A_HUMAN	6.16375e-05	7.40113e-05	6.5597e-05	6.35653e-05		1.02449	0.975506	1.05022
	DIP2B_HUMAN	Disco-interacting protein 2 homolog B OS=Homo sapiens OX=9606 GN=DIP2B PE=1 SV=3	173606	851.03+-123.92	15.4+-1.2	4	6.84248e+06	7.56383e+06	599802	604617	851	DIP2B_HUMAN	0.000690159	0.000828175	0.000722207	0.000727206		1.02322	0.976777	1.04755
	VPS72_HUMAN	Vacuolar protein sorting-associated protein 72 homolog OS=Homo sapiens OX=9606 GN=VPS72 PE=1 SV=1	40797.7	69.31+-18.21	2.0+-0.0	2	1.00733e+06	1.27552e+06	101474	90039.2	69.	VPS72_HUMAN	0.000101604	0.000139659	0.000122182	0.000108295		1.02286	0.977137	1.0468
	IRF4_HUMAN	Interferon regulatory factor 4 OS=Homo sapiens OX=9606 GN=IRF4 PE=1 SV=1	52480.7	274.66+-34.54	6.2+-1.17	4	4.70399e+06	3.88162e+06	273250	441203	274	IRF4_HUMAN	0.000474463	0.000425005	0.000329013	0.00053066		1.02262	0.977378	1.04629
	CDC20_HUMAN	Cell division cycle protein 20 homolog OS=Homo sapiens OX=9606 GN=CDC20 PE=1 SV=2	55087.8	253.61+-90.95	4.6+-1.02	4	1.46663e+06	2.48895e+06	162841	172136	253	CDC20_HUMAN	0.000147931	0.000272519	0.000196072	0.000207038		1.02105	0.978946	1.04301
	TPX2_HUMAN	Targeting protein for Xklp2 OS=Homo sapiens OX=9606 GN=TPX2 PE=1 SV=2	86227.2	1996.31+-195.99	50.4+-4.63	4	7.50493e+07	7.59899e+07	5.61184e+06	7.09332e+06	199	TPX2_HUMAN	0.00756977	0.00832025	0.00675708	0.00853153		1.01929	0.980711	1.03934
	UTP6_HUMAN	U3 small nucleolar RNA-associated protein 6 homolog OS=Homo sapiens OX=9606 GN=UTP6 PE=2 SV=2	70776.1	149.39+-0.0	3.0+-0.0	1	490142	599553	6593.99	85598.4	149	UTP6_HUMAN	4.94377e-05	6.5646e-05	7.93966e-06	0.000102954		1.01854	0.981458	1.03778
	S39AA_HUMAN	Zinc transporter ZIP10 OS=Homo sapiens OX=9606 GN=SLC39A10 PE=1 SV=2	94928	127.43+-22.51	2.4+-0.49	4	1.01885e+06	871449	82036.7	76782.1	127	S39AA_HUMAN	0.000102766	9.54163e-05	9.87783e-05	9.23501e-05		1.01812	0.981882	1.03691
	GEMI_HUMAN	Geminin OS=Homo sapiens OX=9606 GN=GMNN PE=1 SV=1	23664.7	131.31+-32.3	2.8+-0.4	4	1.69008e+06	1.19225e+06	124465	117588	131	GEMI_HUMAN	0.000170468	0.000130541	0.000149865	0.00014143		1.0164	0.9836	1.03335
	DTX3L_HUMAN	E3 ubiquitin-protein ligase DTX3L OS=Homo sapiens OX=9606 GN=DTX3L PE=1 SV=1	84584.7	507.32+-44.32	10.8+-1.83	4	1.03154e+07	6.15484e+06	988056	404656	507	DTX3L_HUMAN	0.00104045	0.000673903	0.00118969	0.000486703		1.01119	0.988806	1.02264
	FYV1_HUMAN	1-phosphatidylinositol 3-phosphate 5-kinase OS=Homo sapiens OX=9606 GN=PIKFYVE PE=1 SV=3	239609	440.48+-51.39	9.6+-1.2	4	1.89096e+06	4.27024e+06	212290	323741	440	FYV1_HUMAN	0.00019073	0.000467555	0.000255613	0.000389382		1.0102	0.989803	1.0206
	NDE1_HUMAN	Nuclear distribution protein nudE homolog 1 OS=Homo sapiens OX=9606 GN=NDE1 PE=1 SV=3	37868.8	187.81+-51.3	2.6+-0.49	4	456384	453789	36502.9	41540.7	187	NDE1_HUMAN	4.60327e-05	4.96861e-05	4.39522e-05	4.99633e-05		1.00951	0.990491	1.0192
	RING1_HUMAN	E3 ubiquitin-protein ligase RING1 OS=Homo sapiens OX=9606 GN=RING1 PE=1 SV=2	42973	152.15+-82.57	3.2+-0.98	4	1.30233e+06	1.30515e+06	76606.6	147331	152	RING1_HUMAN	0.000131358	0.000142903	9.22401e-05	0.000177204		1.00886	0.99114	1.01788
	SMC5_HUMAN	Structural maintenance of chromosomes protein 5 OS=Homo sapiens OX=9606 GN=SMC5 PE=1 SV=2	129980	464.61+-146.39	10.0+-2.53	4	3.56218e+06	4.0933e+06	392358	267441	464	SMC5_HUMAN	0.000359295	0.000448181	0.000472429	0.000321666		1.00836	0.991644	1.01685
	GCC2_HUMAN	GRIP and coiled-coil domain-containing protein 2 OS=Homo sapiens OX=9606 GN=GCC2 PE=1 SV=4	196872	64.9+-0.0	2.0+-0.0	1	693797	170761	38016.1	34661.9	64.	GCC2_HUMAN	6.99791e-05	1.86969e-05	4.57742e-05	4.16898e-05		1.00688	0.993119	1.01386
	FGD1_HUMAN	FYVE, RhoGEF and PH domain-containing protein 1 OS=Homo sapiens OX=9606 GN=FGD1 PE=1 SV=2	107691	216.06+-16.26	4.2+-0.4	4	1.24116e+06	1.60197e+06	148910	104670	216	FGD1_HUMAN	0.000125188	0.000175402	0.000179298	0.000125892		0.992407	1.00759	0.984928
	SMAL1_HUMAN	SWI/SNF-related matrix-associated actin-dependent regulator of chromatin subfamily A-like protein 1 OS=Homo sapiens OX=9606 GN=SMARCAL1 PE=1 SV=1	106442	149.48+-32.02	3.8+-0.43	3	570219	1.30691e+06	76655.8	93619.5	149	SMAL1_HUMAN	5.75146e-05	0.000143095	9.22993e-05	0.000112601		0.989418	1.01058	0.979058
	SC31A_HUMAN	Protein transport protein Sec31A OS=Homo sapiens OX=9606 GN=SEC31A PE=1 SV=3	133900	219.16+-176.37	5.4+-4.18	4	5.72827e+06	4.82231e+06	605579	337291	219	SC31A_HUMAN	0.000577776	0.000528002	0.000729162	0.000405679		0.987029	1.01297	0.974391
	KS6A5_HUMAN	Ribosomal protein S6 kinase alpha-5 OS=Homo sapiens OX=9606 GN=RPS6KA5 PE=1 SV=1	90379	95.35+-18.08	2.3+-0.47	2	680123	729971	79376.1	47490.5	95.	KS6A5_HUMAN	6.85999e-05	7.99256e-05	9.55747e-05	5.71195e-05		0.986161	1.01384	0.972699
	ES8L3_HUMAN	Epidermal growth factor receptor kinase substrate 8-like protein 3 OS=Homo sapiens OX=9606 GN=EPS8L3 PE=1 SV=2	67218.5	414.01+-140.03	11.2+-2.48	4	9.40751e+06	5.69263e+06	751290	600063	414	ES8L3_HUMAN	0.000948879	0.000623294	0.00090461	0.000721729		0.983065	1.01693	0.966695
	MILK2_HUMAN	MICAL-like protein 2 OS=Homo sapiens OX=9606 GN=MICALL2 PE=1 SV=1	98240.3	758.07+-114.44	16.4+-3.38	4	1.36723e+07	1.25759e+07	1.13318e+06	1.24876e+06	758	MILK2_HUMAN	0.00137905	0.00137696	0.00136443	0.00150195		0.980368	1.01963	0.961493
	DOCK9_HUMAN	Dedicator of cytokinesis protein 9 OS=Homo sapiens OX=9606 GN=DOCK9 PE=1 SV=2	238519	645.01+-25.53	13.6+-1.96	4	4.52032e+06	4.36091e+06	292977	520926	645	DOCK9_HUMAN	0.000455938	0.000477482	0.000352766	0.000626546		0.976007	1.02399	0.953138
	CACB2_HUMAN	Voltage-dependent L-type calcium channel subunit beta-2 OS=Homo sapiens OX=9606 GN=CACNB2 PE=1 SV=3	73820.9	227.61+-39.13	3.8+-0.43	3	2.00356e+06	0	72902	103433	227	CACB2_HUMAN	0.000202087	0	8.77795e-05	0.000124405		0.975626	1.02437	0.952412
	FN3K_HUMAN	Fructosamine-3-kinase OS=Homo sapiens OX=9606 GN=FN3K PE=1 SV=1	35376.9	159.48+-37.35	2.8+-0.4	4	1670103	1986703	165769	175464	159	FN3K_HUMAN	0.000168453	0.000217527	0.000199599	0.000211041		0.969046	1.03095	0.93995
	TRI25_HUMAN	E3 ubiquitin/ISG15 ligase TRIM25 OS=Homo sapiens OX=9606 GN=TRIM25 PE=1 SV=2	72581.4	824.37+-129.2	20.2+-3.31	4	1.52639e+07	1.62072e+07	1.40883e+06	1.52138e+06	824	TRI25_HUMAN	0.00153958	0.00177455	0.00169634	0.00182984		0.968999	1.031	0.939863
	UBP42_HUMAN	Ubiquitin carboxyl-terminal hydrolase 42 OS=Homo sapiens OX=9606 GN=USP42 PE=1 SV=3	146785	165.73+-58.44	3.6+-1.02	4	2.10763e+06	1349522	136807	184568	165	UBP42_HUMAN	0.000212584	0.000147761	0.000164725	0.000221991		0.9647	1.0353	0.931808
	YTDC2_HUMAN	3'-5' RNA helicase YTHDC2 OS=Homo sapiens OX=9606 GN=YTHDC2 PE=1 SV=2	161573	1174.48+-76.34	26.4+-1.36	4	2.0952e+07	1.95025e+07	2.0899e+06	1.71535e+06	117	YTDC2_HUMAN	0.00211331	0.00213536	0.0025164	0.00206314		0.96252	1.03748	0.927748
	ACK1_HUMAN	Activated CDC42 kinase 1 OS=Homo sapiens OX=9606 GN=TNK2 PE=1 SV=3	115523	72.72+-0.0	2.0+-0.0	1	338549	0	0	30660.4	72.	ACK1_HUMAN	3.41474e-05	0	0	3.6877e-05		0.961568	1.03843	0.92598
	CHD1L_HUMAN	Chromodomain-helicase-DNA-binding protein 1-like OS=Homo sapiens OX=9606 GN=CHD1L PE=1 SV=3	101507	268.09+-57.89	6.8+-1.72	4	2.56459e+06	3214578	314528	235137	268	CHD1L_HUMAN	0.000258675	0.000351969	0.000378716	0.000282812		0.960002	1.04	0.92308
	CPSF3_HUMAN	Cleavage and polyadenylation specificity factor subunit 3 OS=Homo sapiens OX=9606 GN=CPSF3 PE=1 SV=1	78120.4	137.28+-24.39	3.6+-0.49	4	1.6507e+06	1.26724e+06	169550	105375	137	CPSF3_HUMAN	0.000166497	0.000138752	0.00020415	0.000126741		0.95969	1.04031	0.922504
	REXO4_HUMAN	RNA exonuclease 4 OS=Homo sapiens OX=9606 GN=REXO4 PE=1 SV=2	46870.8	68.53+-4.97	2.3+-0.43	3	53994.8	708618	19756.7	55366.4	68.	REXO4_HUMAN	5.44613e-06	7.75877e-05	2.37885e-05	6.65922e-05		0.957634	1.04237	0.918712
	TBL1R_HUMAN	F-box-like/WD repeat-containing protein TBL1XR1 OS=Homo sapiens OX=9606 GN=TBL1XR1 PE=1 SV=1	56187.3	355.78+-36.7	5.4+-0.8	4	2.38941e+06	1.92432e+06	163182	246825	355	TBL1R_HUMAN	0.000241005	0.000210697	0.000196483	0.000296871		0.955927	1.04407	0.915574
	F91A1_HUMAN	Protein FAM91A1 OS=Homo sapiens OX=9606 GN=FAM91A1 PE=1 SV=3	94648	213.79+-44.9	5.3+-1.3	3	1817365	604944	113397	113734	213	F91A1_HUMAN	0.000183307	6.62363e-05	0.000136538	0.000136794		0.954504	1.0455	0.912968
	DAXX_HUMAN	Death domain-associated protein 6 OS=Homo sapiens OX=9606 GN=DAXX PE=1 SV=2	82064.2	106.17+-20.46	2.0+-0.0	3	364483	723546	54840.4	51034.5	106	DAXX_HUMAN	3.67632e-05	7.92222e-05	6.6032e-05	6.1382e-05		0.953046	1.04695	0.910303
	US6NL_HUMAN	USP6 N-terminal-like protein OS=Homo sapiens OX=9606 GN=USP6NL PE=1 SV=3	94216.7	107.53+-21.46	2.0+-0.0	4	422756	575900	22207.9	74822.5	107	US6NL_HUMAN	4.26409e-05	6.30562e-05	2.67399e-05	8.99931e-05		0.950385	1.04962	0.90546
	TRUA_HUMAN	tRNA pseudouridine synthase A OS=Homo sapiens OX=9606 GN=PUS1 PE=1 SV=3	48010.1	231.81+-45.23	4.0+-0.89	4	1.15018e+06	1.61208e+06	100965	172244	231	TRUA_HUMAN	0.000116012	0.00017651	0.00012157	0.000207167		0.941706	1.05829	0.889834
	FCHO1_HUMAN	F-BAR domain only protein 1 OS=Homo sapiens OX=9606 GN=FCHO1 PE=1 SV=2	97427.9	91.27+-26.39	2.0+-0.0	3	896122	225754	59408.6	48744.4	91.	FCHO1_HUMAN	9.03863e-05	2.47181e-05	7.15324e-05	5.86276e-05		0.938615	1.06138	0.884331
	ILK_HUMAN	Integrin-linked protein kinase OS=Homo sapiens OX=9606 GN=ILK PE=1 SV=2	51899.1	215.0+-33.93	4.6+-0.49	4	1.89726e+06	1.85674e+06	198648	173183	215	ILK_HUMAN	0.000191365	0.000203298	0.000239187	0.000208297		0.937278	1.06272	0.88196
	TTK_HUMAN	Dual specificity protein kinase TTK OS=Homo sapiens OX=9606 GN=TTK PE=1 SV=2	97980.5	547.23+-46.48	11.8+-1.6	4	5.37237e+06	5.41326e+06	653406	431684	547	TTK_HUMAN	0.000541879	0.000592706	0.00078675	0.00051921		0.92978	1.07022	0.868774
	AURKA_HUMAN	Aurora kinase A OS=Homo sapiens OX=9606 GN=AURKA PE=1 SV=2	46180	756.0+-161.46	17.4+-6.25	4	3.40724e+07	1.43833e+07	2.37108e+06	2.427e+06	756	AURKA_HUMAN	0.00343668	0.00157485	0.00285495	0.00291908		0.929303	1.0707	0.867943
	KAT8_HUMAN	Histone acetyltransferase KAT8 OS=Homo sapiens OX=9606 GN=KAT8 PE=1 SV=2	52882.9	127.9+-49.15	2.3+-0.43	3	764655	1.09756e+06	70627.8	119177	127	KAT8_HUMAN	7.71261e-05	0.000120174	8.50412e-05	0.00014334		0.926984	1.07302	0.863905
	HBS1L_HUMAN	HBS1-like protein OS=Homo sapiens OX=9606 GN=HBS1L PE=1 SV=1	75938.8	183.14+-47.73	3.4+-1.36	4	1.56114e+06	1.72585e+06	270472	77602.4	183	HBS1L_HUMAN	0.000157463	0.000188966	0.000325668	9.33367e-05		0.905184	1.09482	0.826791
	TLK1_HUMAN	Serine/threonine-protein kinase tousled-like 1 OS=Homo sapiens OX=9606 GN=TLK1 PE=1 SV=2	87216.2	550.19+-206.12	12.2+-4.12	4	6.12981e+06	7.06505e+06	672235	726953	550	TLK1_HUMAN	0.000618277	0.000773564	0.000809421	0.000874346		0.905083	1.09492	0.826623
	CPSF7_HUMAN	Cleavage and polyadenylation specificity factor subunit 7 OS=Homo sapiens OX=9606 GN=CPSF7 PE=1 SV=1	52189.3	930.88+-232.91	23.0+-8.58	4	1.90203e+07	1.69743e+07	1.7863e+06	2.03472e+06	930	CPSF7_HUMAN	0.00191847	0.00185854	0.00215083	0.00244727		0.901961	1.09804	0.821428
	OSB11_HUMAN	Oxysterol-binding protein-related protein 11 OS=Homo sapiens OX=9606 GN=OSBPL11 PE=1 SV=2	84331.9	522.67+-52.16	10.6+-0.8	4	4.11545e+06	3697656	359258	470493	522	OSB11_HUMAN	0.000415101	0.000404862	0.000432574	0.000565887		0.901839	1.09816	0.821226
	VAV3_HUMAN	Guanine nucleotide exchange factor VAV3 OS=Homo sapiens OX=9606 GN=VAV3 PE=1 SV=1	99082	98.56+-5.42	2.0+-0.0	2	349693	512533	54470.4	38880.4	98.	VAV3_HUMAN	3.52714e-05	5.6118e-05	6.55864e-05	4.67636e-05		0.897121	1.10288	0.813435
	PRSR2_HUMAN	Proline and serine-rich protein 2 OS=Homo sapiens OX=9606 GN=PROSER2 PE=1 SV=2	46116.1	273.62+-37.33	6.8+-1.17	4	5351392	3.40281e+06	410631	521980	273	PRSR2_HUMAN	0.000539763	0.000372579	0.000494431	0.000627814		0.896832	1.10317	0.812961
	PARP9_HUMAN	Protein mono-ADP-ribosyltransferase PARP9 OS=Homo sapiens OX=9606 GN=PARP9 PE=1 SV=2	97307.8	536.95+-84.84	10.2+-1.33	4	5.64811e+06	6.36925e+06	735481	570855	536	PARP9_HUMAN	0.000569691	0.000697379	0.000885574	0.000686599		0.892541	1.10746	0.805935
	HLTF_HUMAN	Helicase-like transcription factor OS=Homo sapiens OX=9606 GN=HLTF PE=1 SV=2	114883	1949.7+-172.44	53.8+-5.49	4	4.88361e+07	4.06121e+07	4.23696e+06	5.46181e+06	194	HLTF_HUMAN	0.0049258	0.00444669	0.00510162	0.00656922		0.89078	1.10922	0.803069
	KDM2A_HUMAN	Lysine-specific demethylase 2A OS=Homo sapiens OX=9606 GN=KDM2A PE=1 SV=3	135159	256.93+-38.37	5.2+-0.98	4	3.49567e+06	3.25953e+06	420150	314458	256	KDM2A_HUMAN	0.000352587	0.000356891	0.000505892	0.000378216		0.890417	1.10958	0.802478
	DMAP1_HUMAN	DNA methyltransferase 1-associated protein 1 OS=Homo sapiens OX=9606 GN=DMAP1 PE=1 SV=1	53130.9	60.24+-0.0	2.0+-0.0	1	0	470638	17898.1	35835.7	60.	DMAP1_HUMAN	0	5.15309e-05	2.15507e-05	4.31016e-05		0.887063	1.11294	0.797047
	RBM25_HUMAN	RNA-binding protein 25 OS=Homo sapiens OX=9606 GN=RBM25 PE=1 SV=3	100467	173.57+-121.13	4.0+-2.28	4	2.02898e+06	1.58014e+06	182792	213245	173	RBM25_HUMAN	0.000204651	0.000173012	0.000220095	0.000256481		0.884209	1.11579	0.79245
	FA76B_HUMAN	Protein FAM76B OS=Homo sapiens OX=9606 GN=FAM76B PE=1 SV=3	39652.7	338.49+-48.86	8.4+-1.62	4	3.31171e+06	3.26155e+06	301359	426086	338	FA76B_HUMAN	0.000334032	0.000357113	0.000362859	0.000512478		0.882417	1.11758	0.789576
	DOCK2_HUMAN	Dedicator of cytokinesis protein 2 OS=Homo sapiens OX=9606 GN=DOCK2 PE=1 SV=2	213123	122.16+-8.17	3.3+-0.47	3	746875	1038077	99117.4	101594	122	DOCK2_HUMAN	7.53327e-05	0.000113661	0.000119345	0.000122193		0.877954	1.12205	0.782458
	NCKP1_HUMAN	Nck-associated protein 1 OS=Homo sapiens OX=9606 GN=NCKAP1 PE=1 SV=1	130018	170.72+-61.54	4.4+-1.2	4	315915	2.06256e+06	102726	171357	170	NCKP1_HUMAN	3.18644e-05	0.000225833	0.00012369	0.0002061		0.877286	1.12271	0.781398
	NR4A3_HUMAN	Nuclear receptor subfamily 4 group A member 3 OS=Homo sapiens OX=9606 GN=NR4A3 PE=1 SV=3	69326.7	221.88+-64.22	9.0+-2.28	4	3.99268e+06	4.39196e+06	319079	630730	221	NR4A3_HUMAN	0.000402718	0.000480883	0.000384195	0.000758613		0.872085	1.12791	0.773184
	ATAT_HUMAN	Alpha-tubulin N-acetyltransferase 1 OS=Homo sapiens OX=9606 GN=ATAT1 PE=1 SV=1	47009.3	177.26+-25.13	3.5+-0.87	3	594785	867997	79973.5	89418.9	177	ATAT_HUMAN	5.99924e-05	9.50383e-05	9.62941e-05	0.000107549		0.863984	1.13602	0.760539
	AMPD3_HUMAN	AMP deaminase 3 OS=Homo sapiens OX=9606 GN=AMPD3 PE=1 SV=1	89268.8	65.18+-0.0	2.0+-0.0	1	161933	535545	50583.4	31640.6	65.	AMPD3_HUMAN	1.63332e-05	5.86377e-05	6.09062e-05	3.80558e-05		0.862066	1.13793	0.757572
	FOXJ3_HUMAN	Forkhead box protein J3 OS=Homo sapiens OX=9606 GN=FOXJ3 PE=1 SV=2	69430.3	173.06+-1.07	2.3+-0.43	3	952883	952894	40455.1	180123	173	FOXJ3_HUMAN	9.61115e-05	0.000104334	4.8711e-05	0.000216644		0.860649	1.13935	0.755385
	ALKB2_HUMAN	DNA oxidative demethylase ALKBH2 OS=Homo sapiens OX=9606 GN=ALKBH2 PE=1 SV=1	29475.3	71.47+-7.33	2.0+-0.0	2	538997	729558	81830.7	66679.6	71.	ALKB2_HUMAN	5.43654e-05	7.98804e-05	9.85303e-05	8.01992e-05		0.857868	1.14213	0.751112
	RN169_HUMAN	E3 ubiquitin-protein ligase RNF169 OS=Homo sapiens OX=9606 GN=RNF169 PE=1 SV=2	78230	701.55+-101.57	13.4+-1.5	4	5.30775e+06	6.98799e+06	721655	717940	701	RN169_HUMAN	0.000535361	0.000765126	0.000868927	0.000863505		0.857581	1.14242	0.750671
	ACOT9_HUMAN	Acyl-coenzyme A thioesterase 9, mitochondrial OS=Homo sapiens OX=9606 GN=ACOT9 PE=1 SV=2	50268.7	224.82+-81.68	5.0+-1.1	4	1.79431e+06	1.76427e+06	205528	211788	224	ACOT9_HUMAN	0.000180982	0.000193173	0.000247471	0.000254729		0.853889	1.14611	0.745032
	VPS35_HUMAN	Vacuolar protein sorting-associated protein 35 OS=Homo sapiens OX=9606 GN=VPS35 PE=1 SV=2	92447.2	177.02+-51.47	2.8+-0.75	4	825001	514380	95899	60633.6	177	VPS35_HUMAN	8.32129e-05	5.63203e-05	0.00011547	7.29274e-05		0.850993	1.14901	0.740634
	SP3_HUMAN	Transcription factor Sp3 OS=Homo sapiens OX=9606 GN=SP3 PE=1 SV=3	82445.8	63.38+-0.0	2.0+-0.0	1	0	497832	2051.95	59880.7	63.	SP3_HUMAN	0	5.45083e-05	2.4707e-06	7.20218e-05		0.845085	1.15491	0.73173
	GRB7_HUMAN	Growth factor receptor-bound protein 7 OS=Homo sapiens OX=9606 GN=GRB7 PE=1 SV=2	60498.7	313.93+-142.6	5.2+-1.6	4	1.99028e+06	2.24011e+06	168500	339010	313	GRB7_HUMAN	0.000200748	0.000245273	0.000202887	0.000407746		0.844214	1.15579	0.730424
	TANC1_HUMAN	Protein TANC1 OS=Homo sapiens OX=9606 GN=TANC1 PE=1 SV=3	204260	1061.2+-151.14	23.4+-5.31	4	9.56109e+06	9.38779e+06	1.02499e+06	1.2462e+06	106	TANC1_HUMAN	0.000964369	0.00102788	0.00123416	0.00149887		0.843231	1.15677	0.728954
	CSDE1_HUMAN	Cold shock domain-containing protein E1 OS=Homo sapiens OX=9606 GN=CSDE1 PE=1 SV=2	89684.2	741.44+-166.67	15.4+-4.27	4	9.03147e+06	8.76649e+06	1.05709e+06	1.07975e+06	741	CSDE1_HUMAN	0.00091095	0.000959857	0.00127281	0.00129868		0.842269	1.15773	0.727517
	PSIP1_HUMAN	PC4 and SFRS1-interacting protein OS=Homo sapiens OX=9606 GN=PSIP1 PE=1 SV=1	60180.7	90.55+-3.86	2.5+-0.5	2	0	609466	56739.9	19814.4	90.	PSIP1_HUMAN	0	6.67313e-05	6.83191e-05	2.38318e-05		0.84001	1.15999	0.724153
	MAZ_HUMAN	Myc-associated zinc finger protein OS=Homo sapiens OX=9606 GN=MAZ PE=1 SV=1	49545.8	90.13+-49.64	2.4+-0.8	4	1.0057e+06	1.28812e+06	114975	163742	90.	MAZ_HUMAN	0.000101438	0.000141039	0.000138439	0.000196942		0.839227	1.16077	0.72299
	BLM_HUMAN	Bloom syndrome protein OS=Homo sapiens OX=9606 GN=BLM PE=1 SV=1	160611	548.0+-62.89	10.0+-1.26	4	3.52466e+06	3557643	425518	431529	548	BLM_HUMAN	0.000355511	0.000389532	0.000512355	0.000519024		0.838813	1.16119	0.722376
	RRP44_HUMAN	Exosome complex exonuclease RRP44 OS=Homo sapiens OX=9606 GN=DIS3 PE=1 SV=2	110017	554.3+-41.47	11.4+-0.49	4	5.48431e+06	5.15865e+06	695833	592457	554	RRP44_HUMAN	0.000553169	0.000564828	0.000837835	0.00071258		0.837949	1.16205	0.721096
	ETV6_HUMAN	Transcription factor ETV6 OS=Homo sapiens OX=9606 GN=ETV6 PE=1 SV=1	53251.7	184.74+-49.56	4.4+-1.62	4	2226302	1702244	224004	252514	184	ETV6_HUMAN	0.000224554	0.000186381	0.000269718	0.000303713		0.834923	1.16508	0.716625
	PMS2_HUMAN	Mismatch repair endonuclease PMS2 OS=Homo sapiens OX=9606 GN=PMS2 PE=1 SV=2	96933.6	367.53+-76.24	6.2+-0.98	4	1.73874e+06	786847	141962	161314	367	PMS2_HUMAN	0.000175376	8.61531e-05	0.000170933	0.000194021		0.834911	1.16509	0.716607
	ZKSC1_HUMAN	Zinc finger protein with KRAB and SCAN domains 1 OS=Homo sapiens OX=9606 GN=ZKSCAN1 PE=1 SV=3	64559.7	145.91+-17.16	2.3+-0.43	3	427146	694548	60945.2	78113.1	145	ZKSC1_HUMAN	4.30836e-05	7.60472e-05	7.33826e-05	9.39509e-05		0.831732	1.16827	0.711936
	NUSAP_HUMAN	Nucleolar and spindle-associated protein 1 OS=Homo sapiens OX=9606 GN=NUSAP1 PE=1 SV=1	49593	510.82+-145.15	10.8+-3.49	4	4.99056e+06	3.84288e+06	620649	470283	510	NUSAP_HUMAN	0.000503368	0.000420763	0.000747308	0.000565635		0.826196	1.1738	0.703862
	SSF1_HUMAN	Suppressor of SWI4 1 homolog OS=Homo sapiens OX=9606 GN=PPAN PE=2 SV=1	53445.9	53.92+-0.0	2.0+-0.0	1	0	3.50366e+06	257007	198135	53.	SSF1_HUMAN	0	0.000383621	0.000309456	0.000238308		0.823764	1.17624	0.700339
	POP1_HUMAN	Ribonucleases P/MRP protein subunit POP1 OS=Homo sapiens OX=9606 GN=POP1 PE=1 SV=2	116346	389.33+-103.06	7.8+-2.56	4	2.05588e+06	3.51424e+06	469689	234451	389	POP1_HUMAN	0.000207364	0.00038478	0.00056554	0.000281987		0.82261	1.17739	0.698672
	TMA16_HUMAN	Translation machinery-associated protein 16 OS=Homo sapiens OX=9606 GN=TMA16 PE=1 SV=2	24077.5	199.95+-39.0	4.6+-0.49	4	3.76392e+06	3.17067e+06	467716	397140	199	TMA16_HUMAN	0.000379644	0.000347161	0.000563165	0.000477662		0.822349	1.17765	0.698296
	PUS7L_HUMAN	Pseudouridylate synthase 7 homolog-like protein OS=Homo sapiens OX=9606 GN=PUS7L PE=1 SV=1	81390.7	254.11+-71.19	6.0+-1.41	3	4.39946e+06	92810.7	218667	322143	254	PUS7L_HUMAN	0.000443747	1.0162e-05	0.000263292	0.000387459		0.821807	1.17819	0.697515
	YTDC1_HUMAN	YTH domain-containing protein 1 OS=Homo sapiens OX=9606 GN=YTHDC1 PE=1 SV=3	84934.4	142.08+-40.08	3.6+-1.36	4	98168.6	1.3901e+06	92222	101094	142	YTDC1_HUMAN	9.90167e-06	0.000152204	0.000111042	0.000121592		0.821329	1.17867	0.696827
	RBM27_HUMAN	RNA-binding protein 27 OS=Homo sapiens OX=9606 GN=RBM27 PE=1 SV=2	119101	232.48+-27.43	4.0+-0.63	4	2.46778e+06	1.32639e+06	218995	252563	232	RBM27_HUMAN	0.00024891	0.000145228	0.000263687	0.000303771		0.819758	1.18024	0.694568
	GRSF1_HUMAN	G-rich sequence factor 1 OS=Homo sapiens OX=9606 GN=GRSF1 PE=1 SV=3	53605.8	198.49+-69.22	3.4+-0.8	4	883916	534376	117806	59744	198	GRSF1_HUMAN	8.91553e-05	5.85096e-05	0.000141847	7.18573e-05		0.817253	1.18275	0.690978
	ELP3_HUMAN	Elongator complex protein 3 OS=Homo sapiens OX=9606 GN=ELP3 PE=1 SV=2	62789.3	132.2+-27.4	2.6+-0.49	4	372276	1120148	100578	93674.5	132	ELP3_HUMAN	3.75492e-05	0.000122647	0.000121104	0.000112667		0.813246	1.18675	0.685269
	PFKAL_HUMAN	ATP-dependent 6-phosphofructokinase, liver type OS=Homo sapiens OX=9606 GN=PFKL PE=1 SV=6	85762.5	466.25+-97.59	9.8+-1.72	4	7214340	8.83821e+06	1.22963e+06	826798	466	PFKAL_HUMAN	0.000727667	0.000967709	0.00148057	0.000994435		0.813055	1.18694	0.684998
	TJAP1_HUMAN	Tight junction-associated protein 1 OS=Homo sapiens OX=9606 GN=TJAP1 PE=1 SV=1	62125.5	425.96+-92.23	8.8+-1.17	4	4.96109e+06	3628153	557976	536608	425	TJAP1_HUMAN	0.000500395	0.000397252	0.000671845	0.000645407		0.810554	1.18945	0.681455
	SNX8_HUMAN	Sorting nexin-8 OS=Homo sapiens OX=9606 GN=SNX8 PE=1 SV=1	52935.3	213.7+-62.41	3.4+-0.8	4	981211	1.26758e+06	128210	165971	213	SNX8_HUMAN	9.89688e-05	0.000138789	0.000154374	0.000199622		0.80357	1.19643	0.67164
	RING2_HUMAN	E3 ubiquitin-protein ligase RING2 OS=Homo sapiens OX=9606 GN=RNF2 PE=1 SV=1	38087.8	145.58+-73.33	3.0+-1.0	3	1.57374e+06	573150	0	275762	145	RING2_HUMAN	0.000158734	6.27551e-05	0	0.000331675		0.800808	1.19919	0.667789
	DPOD3_HUMAN	DNA polymerase delta subunit 3 OS=Homo sapiens OX=9606 GN=POLD3 PE=1 SV=2	51653.4	233.91+-63.48	5.0+-1.1	4	2.42655e+06	982311	215931	222830	233	DPOD3_HUMAN	0.000244751	0.000107555	0.000259997	0.00026801		0.800411	1.19959	0.667237
	SNF5_HUMAN	SWI/SNF-related matrix-associated actin-dependent regulator of chromatin subfamily B member 1 OS=Homo sapiens OX=9606 GN=SMARCB1 PE=1 SV=2	44398.3	117.65+-23.11	2.2+-0.4	4	570320	346883	57032.4	61915.2	117	SNF5_HUMAN	5.75247e-05	3.79808e-05	6.86713e-05	7.44689e-05		0.800395	1.1996	0.667216
	WDR7_HUMAN	WD repeat-containing protein 7 OS=Homo sapiens OX=9606 GN=WDR7 PE=1 SV=2	166157	158.21+-32.73	3.8+-1.17	4	1387991	458487	74447.1	163270	158	WDR7_HUMAN	0.000139998	5.02004e-05	8.96399e-05	0.000196374		0.798798	1.2012	0.664998
	KLF16_HUMAN	Krueppel-like factor 16 OS=Homo sapiens OX=9606 GN=KLF16 PE=1 SV=1	25870.8	239.49+-56.5	5.4+-0.8	4	1.8354e+06	3.91233e+06	209222	561343	239	KLF16_HUMAN	0.000185126	0.000428367	0.000251919	0.000675158		0.796449	1.20355	0.66175
	MCE1_HUMAN	mRNA-capping enzyme OS=Homo sapiens OX=9606 GN=RNGTT PE=1 SV=1	69424.9	348.67+-17.81	8.4+-1.96	4	4.41065e+06	5.37269e+06	610795	710151	348	MCE1_HUMAN	0.000444875	0.000588264	0.000735443	0.000854138		0.787838	1.21216	0.649944
	PARG_HUMAN	Poly(ADP-ribose) glycohydrolase OS=Homo sapiens OX=9606 GN=PARG PE=1 SV=1	112466	291.74+-106.54	4.8+-1.17	4	1.18787e+06	1.24873e+06	126354	202939	291	PARG_HUMAN	0.000119813	0.000136725	0.00015214	0.000244086		0.786007	1.21399	0.647456
	1433F_HUMAN	14-3-3 protein eta OS=Homo sapiens OX=9606 GN=YWHAH PE=1 SV=4	28372.1	141.61+-56.5	3.5+-0.5	2	750462	6.97493e+06	0	0	141	1433F_HUMAN	7.56945e-05	0.000763696	0	0		2	0	Unique
	1433S_HUMAN	14-3-3 protein sigma OS=Homo sapiens OX=9606 GN=SFN PE=1 SV=1	27870.7	82.55+-2.76	2.0+-0.0	2	63813	9118.82	0	0	82.	1433S_HUMAN	6.43643e-06	9.98434e-07	0	0		2	0	Unique
	2AAB_HUMAN	Serine/threonine-protein phosphatase 2A 65 kDa regulatory subunit A beta isoform OS=Homo sapiens OX=9606 GN=PPP2R1B PE=1 SV=3	66798.7	99.95+-0.0	2.0+-0.0	1	883037	570276	0	0	99.	2AAB_HUMAN	8.90666e-05	6.24404e-05	0	0		2	0	Unique
	A16A1_HUMAN	Aldehyde dehydrogenase family 16 member A1 OS=Homo sapiens OX=9606 GN=ALDH16A1 PE=1 SV=2	86100.1	85.11+-0.0	2.0+-0.0	1	0	128120	0	0	85.	A16A1_HUMAN	0	1.4028e-05	0	0		2	0	Unique
	ACOX1_HUMAN	Peroxisomal acyl-coenzyme A oxidase 1 OS=Homo sapiens OX=9606 GN=ACOX1 PE=1 SV=3	74889.4	102.17+-0.0	2.0+-0.0	1	540977	618077	0	0	102	ACOX1_HUMAN	5.45651e-05	6.76743e-05	0	0		2	0	Unique
	ACTN4_HUMAN	Alpha-actinin-4 OS=Homo sapiens OX=9606 GN=ACTN4 PE=1 SV=2	105245	117.23+-2.06	2.0+-0.0	2	524886	514915	0	0	117	ACTN4_HUMAN	5.29421e-05	5.63788e-05	0	0		2	0	Unique
	AK17A_HUMAN	A-kinase anchor protein 17A OS=Homo sapiens OX=9606 GN=AKAP17A PE=1 SV=2	81313.1	62.5+-0.0	2.0+-0.0	1	116611	404998	0	0	62.	AK17A_HUMAN	1.17618e-05	4.43439e-05	0	0		2	0	Unique
	AKAP2_HUMAN	A-kinase anchor protein 2 OS=Homo sapiens OX=9606 GN=AKAP2 PE=1 SV=3	95001.9	244.07+-20.3	5.0+-1.0	2	3.71444e+06	2.67046e+06	0	0	244	AKAP2_HUMAN	0.000374654	0.000292393	0	0		2	0	Unique
	ANK3_HUMAN	Ankyrin-3 OS=Homo sapiens OX=9606 GN=ANK3 PE=1 SV=3	482394	304.18+-22.19	7.0+-1.0	2	2.33326e+06	3.22586e+06	0	0	304	ANK3_HUMAN	0.000235342	0.000353205	0	0		2	0	Unique
	ANR54_HUMAN	Ankyrin repeat domain-containing protein 54 OS=Homo sapiens OX=9606 GN=ANKRD54 PE=1 SV=2	32884.5	190.57+-0.0	2.0+-0.0	1	180735	391384	0	0	190	ANR54_HUMAN	1.82296e-05	4.28533e-05	0	0		2	0	Unique
	ANS1A_HUMAN	Ankyrin repeat and SAM domain-containing protein 1A OS=Homo sapiens OX=9606 GN=ANKS1A PE=1 SV=4	124001	152.72+-18.76	3.5+-0.5	2	660038	550595	0	0	152	ANS1A_HUMAN	6.6574e-05	6.02855e-05	0	0		2	0	Unique
	APC16_HUMAN	Anaphase-promoting complex subunit 16 OS=Homo sapiens OX=9606 GN=ANAPC16 PE=1 SV=1	11716.8	184.93+-6.06	2.5+-0.5	2	486823	645169	0	0	184	APC16_HUMAN	4.91029e-05	7.06406e-05	0	0		2	0	Unique
	ARAP3_HUMAN	Arf-GAP with Rho-GAP domain, ANK repeat and PH domain-containing protein 3 OS=Homo sapiens OX=9606 GN=ARAP3 PE=1 SV=1	171505	73.07+-0.0	2.0+-0.0	1	1.00897e+06	401936	0	0	73.	ARAP3_HUMAN	0.000101769	4.40086e-05	0	0		2	0	Unique
	ARHGB_HUMAN	Rho guanine nucleotide exchange factor 11 OS=Homo sapiens OX=9606 GN=ARHGEF11 PE=1 SV=1	168456	137.31+-47.98	3.0+-1.0	2	291961	996005	0	0	137	ARHGB_HUMAN	2.94483e-05	0.000109054	0	0		2	0	Unique
	ARI5B_HUMAN	AT-rich interactive domain-containing protein 5B OS=Homo sapiens OX=9606 GN=ARID5B PE=1 SV=3	133433	83.23+-0.0	2.0+-0.0	1	0	211392	0	0	83.	ARI5B_HUMAN	0	2.31457e-05	0	0		2	0	Unique
	ARL1_HUMAN	ADP-ribosylation factor-like protein 1 OS=Homo sapiens OX=9606 GN=ARL1 PE=1 SV=1	20518.5	99.09+-0.0	2.0+-0.0	1	450240	0	0	0	99.	ARL1_HUMAN	4.5413e-05	0	0	0		2	0	Unique
	ATG2A_HUMAN	Autophagy-related protein 2 homolog A OS=Homo sapiens OX=9606 GN=ATG2A PE=1 SV=3	214893	141.93+-0.0	2.0+-0.0	1	318992	131762	0	0	141	ATG2A_HUMAN	3.21747e-05	1.44268e-05	0	0		2	0	Unique
	BABA2_HUMAN	BRISC and BRCA1-A complex member 2 OS=Homo sapiens OX=9606 GN=BABAM2 PE=1 SV=2	43980	78.28+-0.0	2.0+-0.0	1	0	297284	0	0	78.	BABA2_HUMAN	0	3.25501e-05	0	0		2	0	Unique
	BAF_HUMAN	Barrier-to-autointegration factor OS=Homo sapiens OX=9606 GN=BANF1 PE=1 SV=1	10280.1	87.39+-18.66	2.0+-0.0	2	469173	399318	0	0	87.	BAF_HUMAN	4.73226e-05	4.37219e-05	0	0		2	0	Unique
	BAG5_HUMAN	BAG family molecular chaperone regulator 5 OS=Homo sapiens OX=9606 GN=BAG5 PE=1 SV=1	51737.9	93.95+-30.78	2.0+-0.0	2	1.33002e+06	1.71135e+06	0	0	93.	BAG5_HUMAN	0.000134151	0.000187378	0	0		2	0	Unique
	BAIP2_HUMAN	Brain-specific angiogenesis inhibitor 1-associated protein 2 OS=Homo sapiens OX=9606 GN=BAIAP2 PE=1 SV=1	61114.7	177.78+-57.41	4.0+-1.0	2	1035620	1.69234e+06	0	0	177	BAIP2_HUMAN	0.000104457	0.000185297	0	0		2	0	Unique
	BIG2_HUMAN	Brefeldin A-inhibited guanine nucleotide-exchange protein 2 OS=Homo sapiens OX=9606 GN=ARFGEF2 PE=1 SV=3	204418	129.04+-0.0	2.0+-0.0	1	137754	351300	0	0	129	BIG2_HUMAN	1.38944e-05	3.84644e-05	0	0		2	0	Unique
	BMS1_HUMAN	Ribosome biogenesis protein BMS1 homolog OS=Homo sapiens OX=9606 GN=BMS1 PE=1 SV=1	146571	53.88+-0.0	2.0+-0.0	1	1030141	1.03276e+06	0	0	53.	BMS1_HUMAN	0.000103904	0.000113078	0	0		2	0	Unique
	BRM1L_HUMAN	Breast cancer metastasis-suppressor 1-like protein OS=Homo sapiens OX=9606 GN=BRMS1L PE=1 SV=2	38004.6	119.34+-0.0	2.0+-0.0	1	657938	246074	0	0	119	BRM1L_HUMAN	6.63622e-05	2.6943e-05	0	0		2	0	Unique
	BUD31_HUMAN	Protein BUD31 homolog OS=Homo sapiens OX=9606 GN=BUD31 PE=1 SV=2	17558.8	90.51+-9.76	2.0+-0.0	2	267862	292090	0	0	90.	BUD31_HUMAN	2.70176e-05	3.19814e-05	0	0		2	0	Unique
	BYST_HUMAN	Bystin OS=Homo sapiens OX=9606 GN=BYSL PE=1 SV=3	49798.1	103.8+-0.0	2.0+-0.0	1	223568	336698	0	0	103	BYST_HUMAN	2.25499e-05	3.68655e-05	0	0		2	0	Unique
	CAB45_HUMAN	45 kDa calcium-binding protein OS=Homo sapiens OX=9606 GN=SDF4 PE=1 SV=1	41894.5	65.36+-0.0	2.0+-0.0	1	520473	1062732	0	0	65.	CAB45_HUMAN	5.2497e-05	0.00011636	0	0		2	0	Unique
	CACB1_HUMAN	Voltage-dependent L-type calcium channel subunit beta-1 OS=Homo sapiens OX=9606 GN=CACNB1 PE=1 SV=3	65958.3	114.81+-0.0	2.0+-0.0	1	0	181976	0	0	114	CACB1_HUMAN	0	1.99248e-05	0	0		2	0	Unique
	CAZA1_HUMAN	F-actin-capping protein subunit alpha-1 OS=Homo sapiens OX=9606 GN=CAPZA1 PE=1 SV=3	33073.4	114.53+-17.2	2.5+-0.5	2	1.46482e+06	937262	0	0	114	CAZA1_HUMAN	0.000147747	0.000102622	0	0		2	0	Unique
	CB042_HUMAN	Uncharacterized protein C2orf42 OS=Homo sapiens OX=9606 GN=C2orf42 PE=1 SV=1	65119.4	65.42+-0.0	2.0+-0.0	1	177922	0	0	0	65.	CB042_HUMAN	1.79459e-05	0	0	0		2	0	Unique
	CBSL_HUMAN	Cystathionine beta-synthase-like protein OS=Homo sapiens OX=9606 GN=CBSL PE=1 SV=1	61175.4	256.24+-3.41	5.0+-1.0	2	2.05779e+06	2.77597e+06	0	0	256	CBSL_HUMAN	0.000207557	0.000303945	0	0		2	0	Unique
	CD2AP_HUMAN	CD2-associated protein OS=Homo sapiens OX=9606 GN=CD2AP PE=1 SV=1	71635.4	559.67+-58.7	13.0+-2.0	2	1.28583e+07	1.27227e+07	0	0	559	CD2AP_HUMAN	0.00129694	0.00139303	0	0		2	0	Unique
	CENPT_HUMAN	Centromere protein T OS=Homo sapiens OX=9606 GN=CENPT PE=1 SV=2	60670.8	42.59+-0.0	2.0+-0.0	1	24609.6	60001.1	0	0	42.	CENPT_HUMAN	2.48222e-06	6.56962e-06	0	0		2	0	Unique
	CH60_HUMAN	60 kDa heat shock protein, mitochondrial OS=Homo sapiens OX=9606 GN=HSPD1 PE=1 SV=2	61187.4	263.0+-136.26	6.0+-2.0	2	1.17281e+06	1.66883e+06	0	0	263	CH60_HUMAN	0.000118295	0.000182723	0	0		2	0	Unique
	CLASR_HUMAN	CLK4-associating serine/arginine rich protein OS=Homo sapiens OX=9606 GN=CLASRP PE=1 SV=4	77285.9	117.65+-0.0	2.0+-0.0	1	126165	197282	0	0	117	CLASR_HUMAN	1.27255e-05	2.16007e-05	0	0		2	0	Unique
	CLK2_HUMAN	Dual specificity protein kinase CLK2 OS=Homo sapiens OX=9606 GN=CLK2 PE=1 SV=1	60509.2	131.58+-0.0	3.0+-0.0	1	285679	732428	0	0	131	CLK2_HUMAN	2.88147e-05	8.01946e-05	0	0		2	0	Unique
	CP135_HUMAN	Centrosomal protein of 135 kDa OS=Homo sapiens OX=9606 GN=CEP135 PE=1 SV=2	133864	92.01+-0.0	2.0+-0.0	1	0	683063	0	0	92.	CP135_HUMAN	0	7.47897e-05	0	0		2	0	Unique
	CSK21_HUMAN	Casein kinase II subunit alpha OS=Homo sapiens OX=9606 GN=CSNK2A1 PE=1 SV=1	45228.8	113.63+-1.94	3.0+-1.0	2	2065542	1670619	0	0	113	CSK21_HUMAN	0.000208339	0.000182919	0	0		2	0	Unique
	CSRP2_HUMAN	Cysteine and glycine-rich protein 2 OS=Homo sapiens OX=9606 GN=CSRP2 PE=1 SV=3	21852.2	106.06+-24.9	2.5+-0.5	2	1.35262e+06	815120	0	0	106	CSRP2_HUMAN	0.00013643	8.92488e-05	0	0		2	0	Unique
	CSTF2_HUMAN	Cleavage stimulation factor subunit 2 OS=Homo sapiens OX=9606 GN=CSTF2 PE=1 SV=1	61034.5	207.05+-12.54	4.5+-1.5	2	2.11666e+06	2.47105e+06	0	0	207	CSTF2_HUMAN	0.000213495	0.000270559	0	0		2	0	Unique
	CYTSA_HUMAN	Cytospin-A OS=Homo sapiens OX=9606 GN=SPECC1L PE=1 SV=2	124925	130.33+-0.0	3.0+-0.0	1	1.21726e+06	353645	0	0	130	CYTSA_HUMAN	0.000122778	3.87211e-05	0	0		2	0	Unique
	DALD3_HUMAN	DALR anticodon-binding domain-containing protein 3 OS=Homo sapiens OX=9606 GN=DALRD3 PE=1 SV=2	60180.1	200.44+-0.0	2.0+-0.0	1	732552	0	0	0	200	DALD3_HUMAN	7.38881e-05	0	0	0		2	0	Unique
	DC1L1_HUMAN	Cytoplasmic dynein 1 light intermediate chain 1 OS=Homo sapiens OX=9606 GN=DYNC1LI1 PE=1 SV=3	56829.1	131.4+-0.0	3.0+-0.0	1	606098	0	0	0	131	DC1L1_HUMAN	6.11334e-05	0	0	0		2	0	Unique
	DC1L2_HUMAN	Cytoplasmic dynein 1 light intermediate chain 2 OS=Homo sapiens OX=9606 GN=DYNC1LI2 PE=1 SV=1	54350.7	87.87+-0.0	2.0+-0.0	1	430398	384445	0	0	87.	DC1L2_HUMAN	4.34117e-05	4.20935e-05	0	0		2	0	Unique
	DDX51_HUMAN	ATP-dependent RNA helicase DDX51 OS=Homo sapiens OX=9606 GN=DDX51 PE=1 SV=3	72982.8	97.03+-40.14	2.5+-0.5	2	1.04758e+06	654854	0	0	97.	DDX51_HUMAN	0.000105663	7.1701e-05	0	0		2	0	Unique
	DHE3_HUMAN	Glutamate dehydrogenase 1, mitochondrial OS=Homo sapiens OX=9606 GN=GLUD1 PE=1 SV=2	61701.3	126.13+-41.22	3.5+-1.5	2	329127	1.61892e+06	0	0	126	DHE3_HUMAN	3.31971e-05	0.000177258	0	0		2	0	Unique
	DNM1L_HUMAN	Dynamin-1-like protein OS=Homo sapiens OX=9606 GN=DNM1L PE=1 SV=2	82339.3	82.47+-0.54	2.0+-0.0	2	753431	549696	0	0	82.	DNM1L_HUMAN	7.5994e-05	6.01871e-05	0	0		2	0	Unique
	DPP9_HUMAN	Dipeptidyl peptidase 9 OS=Homo sapiens OX=9606 GN=DPP9 PE=1 SV=3	98999.3	121.73+-0.0	3.0+-0.0	1	106016	301893	0	0	121	DPP9_HUMAN	1.06932e-05	3.30547e-05	0	0		2	0	Unique
	DPY30_HUMAN	Protein dpy-30 homolog OS=Homo sapiens OX=9606 GN=DPY30 PE=1 SV=1	11242.8	131.06+-0.12	3.5+-0.5	2	1557991	2.08816e+06	0	0	131	DPY30_HUMAN	0.000157145	0.000228636	0	0		2	0	Unique
	DREB_HUMAN	Drebrin OS=Homo sapiens OX=9606 GN=DBN1 PE=1 SV=4	71841.6	128.69+-34.03	2.5+-0.5	2	1.53466e+06	1.94676e+06	0	0	128	DREB_HUMAN	0.000154792	0.000213154	0	0		2	0	Unique
	DSRAD_HUMAN	Double-stranded RNA-specific adenosine deaminase OS=Homo sapiens OX=9606 GN=ADAR PE=1 SV=4	137178	151.43+-0.0	3.0+-0.0	1	139317	1.10615e+06	0	0	151	DSRAD_HUMAN	1.40521e-05	0.000121115	0	0		2	0	Unique
	EF2K_HUMAN	Eukaryotic elongation factor 2 kinase OS=Homo sapiens OX=9606 GN=EEF2K PE=1 SV=2	82662.7	107.66+-0.0	2.0+-0.0	1	1408489	328442	0	0	107	EF2K_HUMAN	0.000142066	3.59616e-05	0	0		2	0	Unique
	EIF3A_HUMAN	Eukaryotic translation initiation factor 3 subunit A OS=Homo sapiens OX=9606 GN=EIF3A PE=1 SV=1	166867	94.88+-0.0	2.0+-0.0	1	674121	238958	0	0	94.	EIF3A_HUMAN	6.79945e-05	2.61638e-05	0	0		2	0	Unique
	EIF3D_HUMAN	Eukaryotic translation initiation factor 3 subunit D OS=Homo sapiens OX=9606 GN=EIF3D PE=1 SV=1	64559.7	89.79+-0.0	2.0+-0.0	1	470384	343225	0	0	89.	EIF3D_HUMAN	4.74448e-05	3.75802e-05	0	0		2	0	Unique
	ENAH_HUMAN	Protein enabled homolog OS=Homo sapiens OX=9606 GN=ENAH PE=1 SV=2	66583.9	98.61+-8.47	2.0+-0.0	2	138361	361385	0	0	98.	ENAH_HUMAN	1.39556e-05	3.95686e-05	0	0		2	0	Unique
	EPC1_HUMAN	Enhancer of polycomb homolog 1 OS=Homo sapiens OX=9606 GN=EPC1 PE=1 SV=1	93975.4	85.77+-0.0	2.0+-0.0	1	238062	94284.4	0	0	85.	EPC1_HUMAN	2.40119e-05	1.03233e-05	0	0		2	0	Unique
	ERP44_HUMAN	Endoplasmic reticulum resident protein 44 OS=Homo sapiens OX=9606 GN=ERP44 PE=1 SV=1	47340.6	150.38+-19.27	3.0+-1.0	2	437548	881786	0	0	150	ERP44_HUMAN	4.41328e-05	9.65481e-05	0	0		2	0	Unique
	ESF1_HUMAN	ESF1 homolog OS=Homo sapiens OX=9606 GN=ESF1 PE=1 SV=1	99134.1	106.5+-16.07	2.0+-0.0	2	750162	327266	0	0	106	ESF1_HUMAN	7.56643e-05	3.58329e-05	0	0		2	0	Unique
	ESYT1_HUMAN	Extended synaptotagmin-1 OS=Homo sapiens OX=9606 GN=ESYT1 PE=1 SV=1	123293	202.66+-29.72	3.5+-0.5	2	829307	477673	0	0	202	ESYT1_HUMAN	8.36472e-05	5.23012e-05	0	0		2	0	Unique
	ESYT2_HUMAN	Extended synaptotagmin-2 OS=Homo sapiens OX=9606 GN=ESYT2 PE=1 SV=1	102807	79.61+-24.96	2.0+-0.0	2	1.07168e+06	965564	0	0	79.	ESYT2_HUMAN	0.000108094	0.000105721	0	0		2	0	Unique
	EXOS4_HUMAN	Exosome complex component RRP41 OS=Homo sapiens OX=9606 GN=EXOSC4 PE=1 SV=3	26651.6	95.1+-0.0	3.0+-0.0	1	149858	871920	0	0	95.	EXOS4_HUMAN	1.51153e-05	9.54679e-05	0	0		2	0	Unique
	F172A_HUMAN	Cotranscriptional regulator FAM172A OS=Homo sapiens OX=9606 GN=FAM172A PE=2 SV=1	48170.4	78.98+-0.0	2.0+-0.0	1	133245	194822	0	0	78.	F172A_HUMAN	1.34396e-05	2.13314e-05	0	0		2	0	Unique
	FBSL_HUMAN	Fibrosin-1-like protein OS=Homo sapiens OX=9606 GN=FBRSL1 PE=1 SV=4	111181	88.94+-28.54	2.0+-0.0	2	697715	1.38973e+06	0	0	88.	FBSL_HUMAN	7.03743e-05	0.000152164	0	0		2	0	Unique
	FOXP2_HUMAN	Forkhead box protein P2 OS=Homo sapiens OX=9606 GN=FOXP2 PE=1 SV=2	80268.9	94.68+-15.49	2.0+-0.0	2	660671	778498	0	0	94.	FOXP2_HUMAN	6.66379e-05	8.5239e-05	0	0		2	0	Unique
	FP100_HUMAN	Fanconi anemia core complex-associated protein 100 OS=Homo sapiens OX=9606 GN=FAAP100 PE=1 SV=3	95539.9	87.25+-0.0	2.0+-0.0	1	717547	432134	0	0	87.	FP100_HUMAN	7.23747e-05	4.7315e-05	0	0		2	0	Unique
	GGNB2_HUMAN	Gametogenetin-binding protein 2 OS=Homo sapiens OX=9606 GN=GGNBP2 PE=1 SV=1	81316.2	139.08+-0.0	2.0+-0.0	1	491931	792807	0	0	139	GGNB2_HUMAN	4.96181e-05	8.68057e-05	0	0		2	0	Unique
	GNAS1_HUMAN	Guanine nucleotide-binding protein G(s) subunit alpha isoforms XLas OS=Homo sapiens OX=9606 GN=GNAS PE=1 SV=2	111697	57.12+-0.0	2.0+-0.0	1	290206	0	0	0	57.	GNAS1_HUMAN	2.92713e-05	0	0	0		2	0	Unique
	GTD2A_HUMAN	General transcription factor II-I repeat domain-containing protein 2A OS=Homo sapiens OX=9606 GN=GTF2IRD2 PE=1 SV=3	108467	119.84+-22.76	4.5+-0.5	2	4660853	5961211	0	0	119	GTD2A_HUMAN	0.000470112	0.000652702	0	0		2	0	Unique
	H2B1C_HUMAN	Histone H2B type 1-C/E/F/G/I OS=Homo sapiens OX=9606 GN=H2BC4 PE=1 SV=4	13897.6	448.1+-6.95	24.5+-0.5	2	1.88198e+06	91378.9	0	0	448	H2B1C_HUMAN	0.000189824	1.00052e-05	0	0		2	0	Unique
	H2B1K_HUMAN	Histone H2B type 1-K OS=Homo sapiens OX=9606 GN=HIST1H2BK PE=1 SV=3	13881.6	412.12+-0.0	24.0+-0.0	1	0	3.34961e+07	0	0	412	H2B1K_HUMAN	0	0.00366755	0	0		2	0	Unique
	H2B1L_HUMAN	Histone H2B type 1-L OS=Homo sapiens OX=9606 GN=HIST1H2BL PE=1 SV=3	13943.6	412.95+-0.0	22.0+-0.0	1	1.768e+08	0	0	0	412	H2B1L_HUMAN	0.0178327	0	0	0		2	0	Unique
	H31_HUMAN	Histone H3.1 OS=Homo sapiens OX=9606 GN=H3C1 PE=1 SV=2	15508.5	81.04+-0.48	2.0+-0.0	2	1.01829e+06	884497	0	0	81.	H31_HUMAN	0.000102709	9.68449e-05	0	0		2	0	Unique
	HD_HUMAN	Huntingtin OS=Homo sapiens OX=9606 GN=HTT PE=1 SV=2	351374	88.54+-0.0	2.0+-0.0	1	179031	0	0	0	88.	HD_HUMAN	1.80578e-05	0	0	0		2	0	Unique
	HDAC3_HUMAN	Histone deacetylase 3 OS=Homo sapiens OX=9606 GN=HDAC3 PE=1 SV=2	49500.7	73.97+-1.81	2.0+-0.0	2	582067	437714	0	0	73.	HDAC3_HUMAN	5.87096e-05	4.7926e-05	0	0		2	0	Unique
	HIF1A_HUMAN	Hypoxia-inducible factor 1-alpha OS=Homo sapiens OX=9606 GN=HIF1A PE=1 SV=1	93467	57.7+-0.0	2.0+-0.0	1	814950	645067	0	0	57.	HIF1A_HUMAN	8.21991e-05	7.06294e-05	0	0		2	0	Unique
	HIRA_HUMAN	Protein HIRA OS=Homo sapiens OX=9606 GN=HIRA PE=1 SV=2	113246	92.36+-0.0	2.0+-0.0	1	220335	484936	0	0	92.	HIRA_HUMAN	2.22239e-05	5.30964e-05	0	0		2	0	Unique
	HIRP3_HUMAN	HIRA-interacting protein 3 OS=Homo sapiens OX=9606 GN=HIRIP3 PE=1 SV=3	62262.1	70.05+-0.0	2.0+-0.0	1	0	520882	0	0	70.	HIRP3_HUMAN	0	5.70322e-05	0	0		2	0	Unique
	HNRPR_HUMAN	Heterogeneous nuclear ribonucleoprotein R OS=Homo sapiens OX=9606 GN=HNRNPR PE=1 SV=1	71184.4	247.21+-84.42	5.5+-1.5	2	2.65573e+06	1.34464e+06	0	0	247	HNRPR_HUMAN	0.000267867	0.000147227	0	0		2	0	Unique
	HS105_HUMAN	Heat shock protein 105 kDa OS=Homo sapiens OX=9606 GN=HSPH1 PE=1 SV=1	97716	76.32+-0.0	2.0+-0.0	1	691518	415821	0	0	76.	HS105_HUMAN	6.97493e-05	4.55289e-05	0	0		2	0	Unique
	HTF4_HUMAN	Transcription factor 12 OS=Homo sapiens OX=9606 GN=TCF12 PE=1 SV=1	73091.4	92.22+-14.65	2.5+-0.5	2	720050	409643	0	0	92.	HTF4_HUMAN	7.26271e-05	4.48524e-05	0	0		2	0	Unique
	ICAL_HUMAN	Calpastatin OS=Homo sapiens OX=9606 GN=CAST PE=1 SV=4	76925.4	108.33+-0.0	3.0+-0.0	1	182591	1.10731e+06	0	0	108	ICAL_HUMAN	1.84168e-05	0.000121241	0	0		2	0	Unique
	IF2GL_HUMAN	Eukaryotic translation initiation factor 2 subunit 3B OS=Homo sapiens OX=9606 GN=EIF2S3B PE=2 SV=2	51766.4	115.26+-0.0	3.0+-0.0	1	0	1.5885e+06	0	0	115	IF2GL_HUMAN	0	0.000173928	0	0		2	0	Unique
	IF2P_HUMAN	Eukaryotic translation initiation factor 5B OS=Homo sapiens OX=9606 GN=EIF5B PE=1 SV=4	139198	729.27+-33.85	15.0+-2.0	2	8.30131e+06	7.98399e+06	0	0	729	IF2P_HUMAN	0.000837302	0.00087418	0	0		2	0	Unique
	IF5_HUMAN	Eukaryotic translation initiation factor 5 OS=Homo sapiens OX=9606 GN=EIF5 PE=1 SV=2	49648	88.22+-4.26	2.0+-0.0	2	135113	403693	0	0	88.	IF5_HUMAN	1.36281e-05	4.42009e-05	0	0		2	0	Unique
	IL16_HUMAN	Pro-interleukin-16 OS=Homo sapiens OX=9606 GN=IL16 PE=1 SV=4	142976	118.02+-21.02	2.0+-0.0	2	243100	246750	0	0	118	IL16_HUMAN	2.45201e-05	2.7017e-05	0	0		2	0	Unique
	IMDH2_HUMAN	Inosine-5'-monophosphate dehydrogenase 2 OS=Homo sapiens OX=9606 GN=IMPDH2 PE=1 SV=2	56225.8	163.42+-21.37	4.5+-1.5	2	1.08372e+06	1.52446e+06	0	0	163	IMDH2_HUMAN	0.000109308	0.000166915	0	0		2	0	Unique
	IQGA3_HUMAN	Ras GTPase-activating-like protein IQGAP3 OS=Homo sapiens OX=9606 GN=IQGAP3 PE=1 SV=2	185268	58.5+-0.0	2.0+-0.0	1	302966	235272	0	0	58.	IQGA3_HUMAN	3.05583e-05	2.57603e-05	0	0		2	0	Unique
	IRX4_HUMAN	Iroquois-class homeodomain protein IRX-4 OS=Homo sapiens OX=9606 GN=IRX4 PE=1 SV=2	54924.1	57.0+-0.0	2.0+-0.0	1	734166	48861.3	0	0	57.	IRX4_HUMAN	7.40509e-05	5.3499e-06	0	0		2	0	Unique
	K1107_HUMAN	AP2-interacting clathrin-endocytosis protein OS=Homo sapiens OX=9606 GN=KIAA1107 PE=1 SV=3	142315	101.1+-0.0	2.0+-0.0	1	16012.4	9583.54	0	0	101	K1107_HUMAN	1.61507e-06	1.04932e-06	0	0		2	0	Unique
	KAP2_HUMAN	cAMP-dependent protein kinase type II-alpha regulatory subunit OS=Homo sapiens OX=9606 GN=PRKAR2A PE=1 SV=2	45832.1	94.53+-0.0	3.0+-0.0	1	633469	65370.3	0	0	94.	KAP2_HUMAN	6.38942e-05	7.1575e-06	0	0		2	0	Unique
	KDM6A_HUMAN	Lysine-specific demethylase 6A OS=Homo sapiens OX=9606 GN=KDM6A PE=1 SV=2	155961	124.4+-0.0	2.0+-0.0	1	162638	0	0	0	124	KDM6A_HUMAN	1.64043e-05	0	0	0		2	0	Unique
	KI16B_HUMAN	Kinesin-like protein KIF16B OS=Homo sapiens OX=9606 GN=KIF16B PE=1 SV=2	152488	108.98+-5.78	2.0+-0.0	2	449480	277891	0	0	108	KI16B_HUMAN	4.53363e-05	3.04267e-05	0	0		2	0	Unique
	KI21A_HUMAN	Kinesin-like protein KIF21A OS=Homo sapiens OX=9606 GN=KIF21A PE=1 SV=2	188374	254.23+-87.04	4.0+-1.0	2	209178	832811	0	0	254	KI21A_HUMAN	2.10986e-05	9.11858e-05	0	0		2	0	Unique
	KIF11_HUMAN	Kinesin-like protein KIF11 OS=Homo sapiens OX=9606 GN=KIF11 PE=1 SV=2	120111	181.46+-48.13	3.0+-0.0	2	1.74062e+06	908311	0	0	181	KIF11_HUMAN	0.000175566	9.94524e-05	0	0		2	0	Unique
	KIF15_HUMAN	Kinesin-like protein KIF15 OS=Homo sapiens OX=9606 GN=KIF15 PE=1 SV=1	161030	215.73+-61.85	3.5+-0.5	2	921538	1.097e+06	0	0	215	KIF15_HUMAN	9.29499e-05	0.000120112	0	0		2	0	Unique
	KIF1B_HUMAN	Kinesin-like protein KIF1B OS=Homo sapiens OX=9606 GN=KIF1B PE=1 SV=5	205774	92.55+-15.8	2.0+-0.0	2	1.33543e+06	1.09186e+06	0	0	92.	KIF1B_HUMAN	0.000134697	0.00011955	0	0		2	0	Unique
	KS6B1_HUMAN	Ribosomal protein S6 kinase beta-1 OS=Homo sapiens OX=9606 GN=RPS6KB1 PE=1 SV=2	59443.9	59.61+-0.0	2.0+-0.0	1	0	1.15769e+06	0	0	59.	KS6B1_HUMAN	0	0.000126757	0	0		2	0	Unique
	LAR1B_HUMAN	La-related protein 1B OS=Homo sapiens OX=9606 GN=LARP1B PE=1 SV=2	105771	212.75+-73.11	3.0+-1.0	2	300622	461470	0	0	212	LAR1B_HUMAN	3.03219e-05	5.05271e-05	0	0		2	0	Unique
	LSP1_HUMAN	Lymphocyte-specific protein 1 OS=Homo sapiens OX=9606 GN=LSP1 PE=1 SV=1	37397.1	165.27+-0.0	3.0+-0.0	1	939804	458599	0	0	165	LSP1_HUMAN	9.47923e-05	5.02127e-05	0	0		2	0	Unique
	MA7D3_HUMAN	MAP7 domain-containing protein 3 OS=Homo sapiens OX=9606 GN=MAP7D3 PE=1 SV=2	98710.3	67.99+-0.0	2.0+-0.0	1	0	188102	0	0	67.	MA7D3_HUMAN	0	2.05956e-05	0	0		2	0	Unique
	MAP1S_HUMAN	Microtubule-associated protein 1S OS=Homo sapiens OX=9606 GN=MAP1S PE=1 SV=2	113111	94.53+-0.0	2.0+-0.0	1	34445.3	127255	0	0	94.	MAP1S_HUMAN	3.47429e-06	1.39333e-05	0	0		2	0	Unique
	MAST4_HUMAN	Microtubule-associated serine/threonine-protein kinase 4 OS=Homo sapiens OX=9606 GN=MAST4 PE=1 SV=4	286146	72.59+-3.07	2.0+-0.0	2	199038	197345	0	0	72.	MAST4_HUMAN	2.00758e-05	2.16076e-05	0	0		2	0	Unique
	MCAF1_HUMAN	Activating transcription factor 7-interacting protein 1 OS=Homo sapiens OX=9606 GN=ATF7IP PE=1 SV=3	137166	158.47+-0.84	2.0+-0.0	2	461179	440293	0	0	158	MCAF1_HUMAN	4.65163e-05	4.82083e-05	0	0		2	0	Unique
	MCCB_HUMAN	Methylcrotonoyl-CoA carboxylase beta chain, mitochondrial OS=Homo sapiens OX=9606 GN=MCCC2 PE=1 SV=1	61807.6	147.02+-0.0	2.0+-0.0	1	0	381144	0	0	147	MCCB_HUMAN	0	4.1732e-05	0	0		2	0	Unique
	MED29_HUMAN	Mediator of RNA polymerase II transcription subunit 29 OS=Homo sapiens OX=9606 GN=MED29 PE=1 SV=1	21458.7	63.88+-0.0	2.0+-0.0	1	216920	137863	0	0	63.	MED29_HUMAN	2.18794e-05	1.50949e-05	0	0		2	0	Unique
	MED8_HUMAN	Mediator of RNA polymerase II transcription subunit 8 OS=Homo sapiens OX=9606 GN=MED8 PE=1 SV=2	29175.9	75.79+-0.0	3.0+-0.0	1	333203	1.38644e+06	0	0	75.	MED8_HUMAN	3.36082e-05	0.000151804	0	0		2	0	Unique
	MEF2C_HUMAN	Myocyte-specific enhancer factor 2C OS=Homo sapiens OX=9606 GN=MEF2C PE=1 SV=1	51531.4	83.19+-0.0	2.0+-0.0	1	733633	403469	0	0	83.	MEF2C_HUMAN	7.39971e-05	4.41764e-05	0	0		2	0	Unique
	MFAP1_HUMAN	Microfibrillar-associated protein 1 OS=Homo sapiens OX=9606 GN=MFAP1 PE=1 SV=2	51926.6	315.56+-84.12	10.0+-1.0	2	2.68737e+06	3.29451e+06	0	0	315	MFAP1_HUMAN	0.000271058	0.000360721	0	0		2	0	Unique
	MIIP_HUMAN	Migration and invasion-inhibitory protein OS=Homo sapiens OX=9606 GN=MIIP PE=1 SV=3	43367.7	53.37+-4.55	2.0+-0.0	2	276181	262969	0	0	53.	MIIP_HUMAN	2.78567e-05	2.87929e-05	0	0		2	0	Unique
	MK14_HUMAN	Mitogen-activated protein kinase 14 OS=Homo sapiens OX=9606 GN=MAPK14 PE=1 SV=3	41495.1	89.12+-0.0	2.0+-0.0	1	259324	49005.1	0	0	89.	MK14_HUMAN	2.61564e-05	5.36564e-06	0	0		2	0	Unique
	MLF2_HUMAN	Myeloid leukemia factor 2 OS=Homo sapiens OX=9606 GN=MLF2 PE=1 SV=1	28186.2	78.13+-0.0	2.0+-0.0	1	509089	0	0	0	78.	MLF2_HUMAN	5.13488e-05	0	0	0		2	0	Unique
	MLXPL_HUMAN	Carbohydrate-responsive element-binding protein OS=Homo sapiens OX=9606 GN=MLXIPL PE=1 SV=1	93698.2	107.39+-0.0	2.0+-0.0	1	762471	179854	0	0	107	MLXPL_HUMAN	7.69059e-05	1.96924e-05	0	0		2	0	Unique
	MO4L1_HUMAN	Mortality factor 4-like protein 1 OS=Homo sapiens OX=9606 GN=MORF4L1 PE=1 SV=2	41561.7	82.5+-5.02	2.5+-0.5	2	649198	1.00979e+06	0	0	82.	MO4L1_HUMAN	6.54807e-05	0.000110563	0	0		2	0	Unique
	MPP7_HUMAN	MAGUK p55 subfamily member 7 OS=Homo sapiens OX=9606 GN=MPP7 PE=1 SV=1	65654.2	79.73+-0.0	2.0+-0.0	1	417871	0	0	0	79.	MPP7_HUMAN	4.21481e-05	0	0	0		2	0	Unique
	MRCKG_HUMAN	Serine/threonine-protein kinase MRCK gamma OS=Homo sapiens OX=9606 GN=CDC42BPG PE=1 SV=2	173778	72.21+-0.0	2.0+-0.0	1	0	258030	0	0	72.	MRCKG_HUMAN	0	2.82521e-05	0	0		2	0	Unique
	MTG8R_HUMAN	Protein CBFA2T2 OS=Homo sapiens OX=9606 GN=CBFA2T2 PE=1 SV=1	67889	166.97+-0.0	2.0+-0.0	1	628254	449366	0	0	166	MTG8R_HUMAN	6.33682e-05	4.92018e-05	0	0		2	0	Unique
	MTMRE_HUMAN	Myotubularin-related protein 14 OS=Homo sapiens OX=9606 GN=MTMR14 PE=1 SV=2	73013.1	171.83+-77.17	2.5+-0.5	2	335300	583885	0	0	171	MTMRE_HUMAN	3.38196e-05	6.39305e-05	0	0		2	0	Unique
	MYC_HUMAN	Myc proto-oncogene protein OS=Homo sapiens OX=9606 GN=MYC PE=1 SV=1	49344.2	110.56+-22.3	2.0+-0.0	2	1446177	715016	0	0	110	MYC_HUMAN	0.000145867	7.82882e-05	0	0		2	0	Unique
	NBN_HUMAN	Nibrin OS=Homo sapiens OX=9606 GN=NBN PE=1 SV=1	85590.2	99.41+-26.34	3.0+-1.0	2	702309	1.23368e+06	0	0	99.	NBN_HUMAN	7.08376e-05	0.000135078	0	0		2	0	Unique
	NCBP1_HUMAN	Nuclear cap-binding protein subunit 1 OS=Homo sapiens OX=9606 GN=NCBP1 PE=1 SV=1	92863.9	55.51+-0.0	3.0+-0.0	1	509342	0	0	0	55.	NCBP1_HUMAN	5.13743e-05	0	0	0		2	0	Unique
	NCBP3_HUMAN	Nuclear cap-binding protein subunit 3 OS=Homo sapiens OX=9606 GN=NCBP3 PE=1 SV=2	70663.4	219.88+-29.89	3.5+-0.5	2	1557751	1.83704e+06	0	0	219	NCBP3_HUMAN	0.000157121	0.00020114	0	0		2	0	Unique
	NCOA7_HUMAN	Nuclear receptor coactivator 7 OS=Homo sapiens OX=9606 GN=NCOA7 PE=1 SV=2	106722	144.08+-0.0	2.0+-0.0	1	412026	423390	0	0	144	NCOA7_HUMAN	4.15586e-05	4.63577e-05	0	0		2	0	Unique
	NFIX_HUMAN	Nuclear factor 1 X-type OS=Homo sapiens OX=9606 GN=NFIX PE=1 SV=2	55576.9	178.57+-0.0	2.0+-0.0	1	231262	593258	0	0	178	NFIX_HUMAN	2.3326e-05	6.49568e-05	0	0		2	0	Unique
	NFKB1_HUMAN	Nuclear factor NF-kappa-B p105 subunit OS=Homo sapiens OX=9606 GN=NFKB1 PE=1 SV=2	105917	86.03+-23.91	3.0+-0.0	2	874962	829747	0	0	86.	NFKB1_HUMAN	8.82521e-05	9.08503e-05	0	0		2	0	Unique
	NIPA_HUMAN	Nuclear-interacting partner of ALK OS=Homo sapiens OX=9606 GN=ZC3HC1 PE=1 SV=1	56366.5	96.19+-0.0	2.0+-0.0	1	268873	758859	0	0	96.	NIPA_HUMAN	2.71196e-05	8.30886e-05	0	0		2	0	Unique
	NOL4L_HUMAN	Nucleolar protein 4-like OS=Homo sapiens OX=9606 GN=NOL4L PE=1 SV=2	47527.5	130.18+-0.0	3.0+-0.0	1	813097	215757	0	0	130	NOL4L_HUMAN	8.20122e-05	2.36235e-05	0	0		2	0	Unique
	NOL8_HUMAN	Nucleolar protein 8 OS=Homo sapiens OX=9606 GN=NOL8 PE=1 SV=1	132448	137.54+-0.0	2.0+-0.0	1	0	219946	0	0	137	NOL8_HUMAN	0	2.40822e-05	0	0		2	0	Unique
	NOP14_HUMAN	Nucleolar protein 14 OS=Homo sapiens OX=9606 GN=NOP14 PE=1 SV=3	98291.6	146.01+-29.65	3.0+-1.0	2	209528	903448	0	0	146	NOP14_HUMAN	2.11338e-05	9.89199e-05	0	0		2	0	Unique
	NU214_HUMAN	Nuclear pore complex protein Nup214 OS=Homo sapiens OX=9606 GN=NUP214 PE=1 SV=2	214230	112.91+-42.12	2.5+-0.5	2	565551	605569	0	0	112	NU214_HUMAN	5.70437e-05	6.63047e-05	0	0		2	0	Unique
	NUCL_HUMAN	Nucleolin OS=Homo sapiens OX=9606 GN=NCL PE=1 SV=3	76625.4	147.38+-8.57	3.0+-0.0	2	521367	650946	0	0	147	NUCL_HUMAN	5.25871e-05	7.12731e-05	0	0		2	0	Unique
	ODO1_HUMAN	2-oxoglutarate dehydrogenase, mitochondrial OS=Homo sapiens OX=9606 GN=OGDH PE=1 SV=3	117059	79.13+-0.0	2.0+-0.0	1	0	709325	0	0	79.	ODO1_HUMAN	0	7.76651e-05	0	0		2	0	Unique
	OSER1_HUMAN	Oxidative stress-responsive serine-rich protein 1 OS=Homo sapiens OX=9606 GN=OSER1 PE=1 SV=2	32158.7	197.28+-30.78	2.5+-0.5	2	999536	826108	0	0	197	OSER1_HUMAN	0.000100817	9.04518e-05	0	0		2	0	Unique
	P53_HUMAN	Cellular tumor antigen p53 OS=Homo sapiens OX=9606 GN=TP53 PE=1 SV=4	44195.6	53.52+-0.0	3.0+-0.0	1	745308	829497	0	0	53.	P53_HUMAN	7.51747e-05	9.08229e-05	0	0		2	0	Unique
	PAWR_HUMAN	PRKC apoptosis WT1 regulator protein OS=Homo sapiens OX=9606 GN=PAWR PE=1 SV=1	36659.5	143.26+-45.02	2.5+-0.5	2	814955	205041	0	0	143	PAWR_HUMAN	8.21995e-05	2.24502e-05	0	0		2	0	Unique
	PCY1A_HUMAN	Choline-phosphate cytidylyltransferase A OS=Homo sapiens OX=9606 GN=PCYT1A PE=1 SV=2	42047	108.22+-0.0	2.0+-0.0	1	192515	71326.1	0	0	108	PCY1A_HUMAN	1.94178e-05	7.80961e-06	0	0		2	0	Unique
	PEX5_HUMAN	Peroxisomal targeting signal 1 receptor OS=Homo sapiens OX=9606 GN=PEX5 PE=1 SV=3	71162.8	70.49+-0.0	2.0+-0.0	1	997415	216334	0	0	70.	PEX5_HUMAN	0.000100603	2.36868e-05	0	0		2	0	Unique
	PITM1_HUMAN	Membrane-associated phosphatidylinositol transfer protein 1 OS=Homo sapiens OX=9606 GN=PITPNM1 PE=1 SV=4	135904	72.84+-0.0	2.0+-0.0	1	272144	497704	0	0	72.	PITM1_HUMAN	2.74495e-05	5.44944e-05	0	0		2	0	Unique
	PITM2_HUMAN	Membrane-associated phosphatidylinositol transfer protein 2 OS=Homo sapiens OX=9606 GN=PITPNM2 PE=1 SV=1	149980	105.13+-0.0	2.0+-0.0	1	371367	0	0	0	105	PITM2_HUMAN	3.74575e-05	0	0	0		2	0	Unique
	PJA2_HUMAN	E3 ubiquitin-protein ligase Praja-2 OS=Homo sapiens OX=9606 GN=PJA2 PE=1 SV=4	79192.2	103.81+-8.23	2.0+-0.0	2	163651	145204	0	0	103	PJA2_HUMAN	1.65064e-05	1.58986e-05	0	0		2	0	Unique
	PRAG1_HUMAN	Inactive tyrosine-protein kinase PRAG1 OS=Homo sapiens OX=9606 GN=PRAG1 PE=1 SV=4	152266	132.01+-12.52	2.5+-0.5	2	348406	326310	0	0	132	PRAG1_HUMAN	3.51417e-05	3.57281e-05	0	0		2	0	Unique
	PRP6_HUMAN	Pre-mRNA-processing factor 6 OS=Homo sapiens OX=9606 GN=PRPF6 PE=1 SV=1	107656	156.99+-28.17	2.5+-0.5	2	1.74526e+06	1.01194e+06	0	0	156	PRP6_HUMAN	0.000176034	0.000110799	0	0		2	0	Unique
	PRS6A_HUMAN	26S proteasome regulatory subunit 6A OS=Homo sapiens OX=9606 GN=PSMC3 PE=1 SV=3	49457.6	243.37+-49.65	5.5+-0.5	2	3.33463e+06	3.05172e+06	0	0	243	PRS6A_HUMAN	0.000336344	0.000334137	0	0		2	0	Unique
	PWP2B_HUMAN	PWWP domain-containing protein 2B OS=Homo sapiens OX=9606 GN=PWWP2B PE=1 SV=3	64611.9	78.14+-0.0	2.0+-0.0	1	380920	0	0	0	78.	PWP2B_HUMAN	3.84211e-05	0	0	0		2	0	Unique
	QTRT2_HUMAN	Queuine tRNA-ribosyltransferase accessory subunit 2 OS=Homo sapiens OX=9606 GN=QTRT2 PE=1 SV=1	47537.9	100.23+-0.0	2.0+-0.0	1	1.25828e+06	453425	0	0	100	QTRT2_HUMAN	0.000126915	4.96462e-05	0	0		2	0	Unique
	RAI14_HUMAN	Ankycorbin OS=Homo sapiens OX=9606 GN=RAI14 PE=1 SV=2	110601	226.5+-55.0	4.5+-1.5	2	1.13789e+06	582691	0	0	226	RAI14_HUMAN	0.000114772	6.37997e-05	0	0		2	0	Unique
	RB6I2_HUMAN	ELKS/Rab6-interacting/CAST family member 1 OS=Homo sapiens OX=9606 GN=ERC1 PE=1 SV=1	128236	651.47+-60.66	9.0+-1.0	2	3.91256e+06	3.14038e+06	0	0	651	RB6I2_HUMAN	0.000394637	0.000343845	0	0		2	0	Unique
	RBBP4_HUMAN	Histone-binding protein RBBP4 OS=Homo sapiens OX=9606 GN=RBBP4 PE=1 SV=3	47911.2	215.22+-26.56	4.0+-0.0	2	7303310	8665805	0	0	215	RBBP4_HUMAN	0.000736641	0.000948832	0	0		2	0	Unique
	RBBP6_HUMAN	E3 ubiquitin-protein ligase RBBP6 OS=Homo sapiens OX=9606 GN=RBBP6 PE=1 SV=1	202354	185.84+-21.53	4.0+-0.0	2	674918	730309	0	0	185	RBBP6_HUMAN	6.80748e-05	7.99626e-05	0	0		2	0	Unique
	RBM3_HUMAN	RNA-binding protein 3 OS=Homo sapiens OX=9606 GN=RBM3 PE=1 SV=1	17160	145.13+-2.72	3.5+-0.5	2	3.65691e+06	2.18361e+06	0	0	145	RBM3_HUMAN	0.00036885	0.000239086	0	0		2	0	Unique
	RBM48_HUMAN	RNA-binding protein 48 OS=Homo sapiens OX=9606 GN=RBM48 PE=1 SV=1	42238.1	120.53+-0.0	2.0+-0.0	1	426152	989991	0	0	120	RBM48_HUMAN	4.29834e-05	0.000108396	0	0		2	0	Unique
	RC3H1_HUMAN	Roquin-1 OS=Homo sapiens OX=9606 GN=RC3H1 PE=1 SV=1	126627	81.81+-0.0	2.0+-0.0	1	683783	560125	0	0	81.	RC3H1_HUMAN	6.89691e-05	6.13289e-05	0	0		2	0	Unique
	RCOR3_HUMAN	REST corepressor 3 OS=Homo sapiens OX=9606 GN=RCOR3 PE=1 SV=2	55661.1	93.31+-15.4	2.5+-0.5	2	3.07731e+06	5.45266e+06	0	0	93.	RCOR3_HUMAN	0.000310389	0.000597021	0	0		2	0	Unique
	REPS1_HUMAN	RalBP1-associated Eps domain-containing protein 1 OS=Homo sapiens OX=9606 GN=REPS1 PE=1 SV=3	86780.3	116.79+-0.0	2.0+-0.0	1	138331	261663	0	0	116	REPS1_HUMAN	1.39526e-05	2.86499e-05	0	0		2	0	Unique
	RHG17_HUMAN	Rho GTPase-activating protein 17 OS=Homo sapiens OX=9606 GN=ARHGAP17 PE=1 SV=1	95776.5	171.78+-69.94	2.5+-0.5	2	1.04551e+06	1.15042e+06	0	0	171	RHG17_HUMAN	0.000105454	0.000125962	0	0		2	0	Unique
	RL10A_HUMAN	60S ribosomal protein L10a OS=Homo sapiens OX=9606 GN=RPL10A PE=1 SV=2	24986.6	123.02+-24.41	3.5+-0.5	2	2.22004e+06	2866659	0	0	123	RL10A_HUMAN	0.000223922	0.000313875	0	0		2	0	Unique
	RNPS1_HUMAN	RNA-binding protein with serine-rich domain 1 OS=Homo sapiens OX=9606 GN=RNPS1 PE=1 SV=1	34187.7	103.48+-25.44	3.0+-1.0	2	1.02217e+06	2.77291e+06	0	0	103	RNPS1_HUMAN	0.0001031	0.00030361	0	0		2	0	Unique
	RPAB1_HUMAN	DNA-directed RNA polymerases I, II, and III subunit RPABC1 OS=Homo sapiens OX=9606 GN=POLR2E PE=1 SV=4	24649.7	126.55+-0.0	2.0+-0.0	1	0	674756	0	0	126	RPAB1_HUMAN	0	7.38801e-05	0	0		2	0	Unique
	RS19_HUMAN	40S ribosomal protein S19 OS=Homo sapiens OX=9606 GN=RPS19 PE=1 SV=2	16050.5	122.94+-16.97	2.5+-0.5	2	1.24019e+06	789177	0	0	122	RS19_HUMAN	0.00012509	8.64082e-05	0	0		2	0	Unique
	RUXF_HUMAN	Small nuclear ribonucleoprotein F OS=Homo sapiens OX=9606 GN=SNRPF PE=1 SV=1	9775.8	59.97+-4.24	2.5+-0.5	2	79413.2	54560	0	0	59.	RUXF_HUMAN	8.00993e-06	5.97386e-06	0	0		2	0	Unique
	S10AA_HUMAN	Protein S100-A10 OS=Homo sapiens OX=9606 GN=S100A10 PE=1 SV=2	11309.5	59.29+-0.0	2.0+-0.0	1	0	224548	0	0	59.	S10AA_HUMAN	0	2.45861e-05	0	0		2	0	Unique
	SC22B_HUMAN	Vesicle-trafficking protein SEC22b OS=Homo sapiens OX=9606 GN=SEC22B PE=1 SV=4	24805.6	146.04+-0.0	3.0+-0.0	1	1.20845e+06	0	0	0	146	SC22B_HUMAN	0.000121889	0	0	0		2	0	Unique
	SEBP2_HUMAN	Selenocysteine insertion sequence-binding protein 2 OS=Homo sapiens OX=9606 GN=SECISBP2 PE=1 SV=2	96086.6	95.08+-1.77	2.0+-0.0	2	478836	355837	0	0	95.	SEBP2_HUMAN	4.82972e-05	3.89612e-05	0	0		2	0	Unique
	SENP5_HUMAN	Sentrin-specific protease 5 OS=Homo sapiens OX=9606 GN=SENP5 PE=1 SV=3	87949.3	151.85+-0.0	2.0+-0.0	1	0	124680	0	0	151	SENP5_HUMAN	0	1.36514e-05	0	0		2	0	Unique
	SEPT6_HUMAN	Septin-6 OS=Homo sapiens OX=9606 GN=SEPTIN6 PE=1 SV=4	50084.5	317.6+-6.27	5.0+-0.0	2	2.40787e+06	1.6466e+06	0	0	317	SEPT6_HUMAN	0.000242868	0.000180288	0	0		2	0	Unique
	SEPT8_HUMAN	Septin-8 OS=Homo sapiens OX=9606 GN=SEPTIN8 PE=1 SV=4	56234.2	65.53+-0.0	2.0+-0.0	1	658986	4.58562e+06	0	0	65.	SEPT8_HUMAN	6.6468e-05	0.000502087	0	0		2	0	Unique
	SF3A1_HUMAN	Splicing factor 3A subunit 1 OS=Homo sapiens OX=9606 GN=SF3A1 PE=1 SV=1	88887.5	264.89+-34.15	6.0+-1.0	2	2.62849e+06	1.99152e+06	0	0	264	SF3A1_HUMAN	0.00026512	0.000218055	0	0		2	0	Unique
	SF3A3_HUMAN	Splicing factor 3A subunit 3 OS=Homo sapiens OX=9606 GN=SF3A3 PE=1 SV=1	59154.4	84.76+-0.0	2.0+-0.0	1	364303	338496	0	0	84.	SF3A3_HUMAN	3.67451e-05	3.70625e-05	0	0		2	0	Unique
	SH319_HUMAN	SH3 domain-containing protein 19 OS=Homo sapiens OX=9606 GN=SH3D19 PE=1 SV=2	87041.9	77.2+-0.0	2.0+-0.0	1	232215	275226	0	0	77.	SH319_HUMAN	2.34221e-05	3.01349e-05	0	0		2	0	Unique
	SHCBP_HUMAN	SHC SH2 domain-binding protein 1 OS=Homo sapiens OX=9606 GN=SHCBP1 PE=1 SV=3	76725.6	111.22+-0.0	2.0+-0.0	1	251440	118846	0	0	111	SHCBP_HUMAN	2.53612e-05	1.30126e-05	0	0		2	0	Unique
	SHKB1_HUMAN	SH3KBP1-binding protein 1 OS=Homo sapiens OX=9606 GN=SHKBP1 PE=1 SV=2	76923.1	112.16+-24.48	2.0+-0.0	2	563264	912311	0	0	112	SHKB1_HUMAN	5.68131e-05	9.98904e-05	0	0		2	0	Unique
	SHRM3_HUMAN	Protein Shroom3 OS=Homo sapiens OX=9606 GN=SHROOM3 PE=1 SV=2	218321	79.9+-0.0	2.0+-0.0	1	275360	207126	0	0	79.	SHRM3_HUMAN	2.77739e-05	2.26785e-05	0	0		2	0	Unique
	SIN3B_HUMAN	Paired amphipathic helix protein Sin3b OS=Homo sapiens OX=9606 GN=SIN3B PE=1 SV=2	134067	85.44+-0.0	2.0+-0.0	1	0	176801	0	0	85.	SIN3B_HUMAN	0	1.93583e-05	0	0		2	0	Unique
	SKT_HUMAN	Sickle tail protein homolog OS=Homo sapiens OX=9606 GN=KIAA1217 PE=1 SV=2	214610	113.22+-0.0	2.0+-0.0	1	229690	0	0	0	113	SKT_HUMAN	2.31675e-05	0	0	0		2	0	Unique
	SMBP2_HUMAN	DNA-binding protein SMUBP-2 OS=Homo sapiens OX=9606 GN=IGHMBP2 PE=1 SV=3	109994	225.74+-5.1	5.0+-0.0	2	1.04135e+06	2.24412e+06	0	0	225	SMBP2_HUMAN	0.000105035	0.000245712	0	0		2	0	Unique
	SMTN_HUMAN	Smoothelin OS=Homo sapiens OX=9606 GN=SMTN PE=1 SV=7	99511.4	75.56+-0.0	2.0+-0.0	1	0	171940	0	0	75.	SMTN_HUMAN	0	1.8826e-05	0	0		2	0	Unique
	SP130_HUMAN	Histone deacetylase complex subunit SAP130 OS=Homo sapiens OX=9606 GN=SAP130 PE=1 SV=1	110427	229.49+-0.0	4.0+-0.0	1	21036.2	1.14064e+06	0	0	229	SP130_HUMAN	2.12179e-06	0.00012489	0	0		2	0	Unique
	SPC25_HUMAN	Kinetochore protein Spc25 OS=Homo sapiens OX=9606 GN=SPC25 PE=1 SV=1	26193.5	91.19+-0.0	2.0+-0.0	1	563558	475820	0	0	91.	SPC25_HUMAN	5.68427e-05	5.20982e-05	0	0		2	0	Unique
	STAG1_HUMAN	Cohesin subunit SA-1 OS=Homo sapiens OX=9606 GN=STAG1 PE=1 SV=3	145305	115.17+-0.23	2.0+-0.0	2	1.06767e+06	822000	0	0	115	STAG1_HUMAN	0.000107689	9.00021e-05	0	0		2	0	Unique
	STXB2_HUMAN	Syntaxin-binding protein 2 OS=Homo sapiens OX=9606 GN=STXBP2 PE=1 SV=2	66866.7	94.4+-0.0	2.0+-0.0	1	0	660773	0	0	94.	STXB2_HUMAN	0	7.23491e-05	0	0		2	0	Unique
	SYMC_HUMAN	Methionine--tRNA ligase, cytoplasmic OS=Homo sapiens OX=9606 GN=MARS PE=1 SV=2	102249	94.9+-0.0	2.0+-0.0	1	495256	106788	0	0	94.	SYMC_HUMAN	4.99535e-05	1.16923e-05	0	0		2	0	Unique
	SYTM_HUMAN	Threonine--tRNA ligase, mitochondrial OS=Homo sapiens OX=9606 GN=TARS2 PE=1 SV=1	81840.8	95.56+-0.0	2.0+-0.0	1	112504	296444	0	0	95.	SYTM_HUMAN	1.13476e-05	3.24581e-05	0	0		2	0	Unique
	TAB1_HUMAN	TGF-beta-activated kinase 1 and MAP3K7-binding protein 1 OS=Homo sapiens OX=9606 GN=TAB1 PE=1 SV=1	54895.5	295.27+-124.62	5.0+-1.0	2	2.67516e+06	1.08299e+06	0	0	295	TAB1_HUMAN	0.000269827	0.000118578	0	0		2	0	Unique
	TAB3_HUMAN	TGF-beta-activated kinase 1 and MAP3K7-binding protein 3 OS=Homo sapiens OX=9606 GN=TAB3 PE=1 SV=3	79344.9	54.77+-0.0	2.0+-0.0	1	200743	17048.7	0	0	54.	TAB3_HUMAN	2.02478e-05	1.86669e-06	0	0		2	0	Unique
	TBCD1_HUMAN	TBC1 domain family member 1 OS=Homo sapiens OX=9606 GN=TBC1D1 PE=1 SV=2	134311	120.62+-0.0	2.0+-0.0	1	126851	0	0	0	120	TBCD1_HUMAN	1.27947e-05	0	0	0		2	0	Unique
	TBD_HUMAN	Tubulin delta chain OS=Homo sapiens OX=9606 GN=TUBD1 PE=2 SV=2	51457.4	41.27+-0.0	2.0+-0.0	1	654141	473032	0	0	41.	TBD_HUMAN	6.59792e-05	5.1793e-05	0	0		2	0	Unique
	TCF20_HUMAN	Transcription factor 20 OS=Homo sapiens OX=9606 GN=TCF20 PE=1 SV=3	213123	105.56+-0.0	2.0+-0.0	1	527957	602191	0	0	105	TCF20_HUMAN	5.32518e-05	6.59348e-05	0	0		2	0	Unique
	TDIF1_HUMAN	Deoxynucleotidyltransferase terminal-interacting protein 1 OS=Homo sapiens OX=9606 GN=DNTTIP1 PE=1 SV=2	37275	116.67+-3.77	2.0+-0.0	2	797248	833160	0	0	116	TDIF1_HUMAN	8.04136e-05	9.12239e-05	0	0		2	0	Unique
	TERA_HUMAN	Transitional endoplasmic reticulum ATPase OS=Homo sapiens OX=9606 GN=VCP PE=1 SV=4	89950	108.77+-0.0	2.0+-0.0	1	556786	117354	0	0	108	TERA_HUMAN	5.61596e-05	1.28493e-05	0	0		2	0	Unique
	TF2AA_HUMAN	Transcription initiation factor IIA subunit 1 OS=Homo sapiens OX=9606 GN=GTF2A1 PE=1 SV=1	41545.5	79.56+-20.05	2.5+-0.5	2	898580	190455	0	0	79.	TF2AA_HUMAN	9.06344e-05	2.08532e-05	0	0		2	0	Unique
	TGM2_HUMAN	Protein-glutamine gamma-glutamyltransferase 2 OS=Homo sapiens OX=9606 GN=TGM2 PE=1 SV=2	78420.1	74.37+-0.0	2.0+-0.0	1	587494	86213.6	0	0	74.	TGM2_HUMAN	5.9257e-05	9.43966e-06	0	0		2	0	Unique
	TISD_HUMAN	mRNA decay activator protein ZFP36L2 OS=Homo sapiens OX=9606 GN=ZFP36L2 PE=1 SV=3	52000.2	64.57+-0.0	2.0+-0.0	1	747285	0	0	0	64.	TISD_HUMAN	7.53742e-05	0	0	0		2	0	Unique
	TKT_HUMAN	Transketolase OS=Homo sapiens OX=9606 GN=TKT PE=1 SV=3	68519	123.29+-0.0	2.0+-0.0	1	343626	198828	0	0	123	TKT_HUMAN	3.46595e-05	2.177e-05	0	0		2	0	Unique
	TOP1_HUMAN	DNA topoisomerase 1 OS=Homo sapiens OX=9606 GN=TOP1 PE=1 SV=2	91125.1	160.47+-39.36	4.0+-1.0	2	1.35254e+06	2.7864e+06	0	0	160	TOP1_HUMAN	0.000136422	0.000305087	0	0		2	0	Unique
	TPM1_HUMAN	Tropomyosin alpha-1 chain OS=Homo sapiens OX=9606 GN=TPM1 PE=1 SV=2	32745.7	89.32+-8.26	2.0+-0.0	2	1.2797e+06	40647.6	0	0	89.	TPM1_HUMAN	0.000129076	4.45057e-06	0	0		2	0	Unique
	TPM3_HUMAN	Tropomyosin alpha-3 chain OS=Homo sapiens OX=9606 GN=TPM3 PE=1 SV=2	32986.8	82.14+-0.32	2.0+-0.0	2	120344	1.86016e+06	0	0	82.	TPM3_HUMAN	1.21384e-05	0.000203671	0	0		2	0	Unique
	TRA2B_HUMAN	Transformer-2 protein homolog beta OS=Homo sapiens OX=9606 GN=TRA2B PE=1 SV=1	33759.6	159.7+-15.46	3.5+-0.5	2	3.81547e+06	2965920	0	0	159	TRA2B_HUMAN	0.000384844	0.000324743	0	0		2	0	Unique
	TRIM5_HUMAN	Tripartite motif-containing protein 5 OS=Homo sapiens OX=9606 GN=TRIM5 PE=1 SV=1	57499.5	123.15+-0.0	2.0+-0.0	1	223742	0	0	0	123	TRIM5_HUMAN	2.25675e-05	0	0	0		2	0	Unique
	TRIPB_HUMAN	Thyroid receptor-interacting protein 11 OS=Homo sapiens OX=9606 GN=TRIP11 PE=1 SV=3	228131	71.43+-0.0	2.0+-0.0	1	0	291899	0	0	71.	TRIPB_HUMAN	0	3.19605e-05	0	0		2	0	Unique
	TSR1_HUMAN	Pre-rRNA-processing protein TSR1 homolog OS=Homo sapiens OX=9606 GN=TSR1 PE=1 SV=1	92151	111.02+-0.0	2.0+-0.0	1	1085246	720267	0	0	111	TSR1_HUMAN	0.000109462	7.88632e-05	0	0		2	0	Unique
	TTC14_HUMAN	Tetratricopeptide repeat protein 14 OS=Homo sapiens OX=9606 GN=TTC14 PE=1 SV=1	88777.7	85.42+-0.0	2.0+-0.0	1	575888	231079	0	0	85.	TTC14_HUMAN	5.80863e-05	2.53012e-05	0	0		2	0	Unique
	TWF1_HUMAN	Twinfilin-1 OS=Homo sapiens OX=9606 GN=TWF1 PE=1 SV=3	40428.7	141.56+-0.0	2.0+-0.0	1	281082	685751	0	0	141	TWF1_HUMAN	2.8351e-05	7.5084e-05	0	0		2	0	Unique
	UBIP1_HUMAN	Upstream-binding protein 1 OS=Homo sapiens OX=9606 GN=UBP1 PE=1 SV=1	60909.3	122.11+-0.0	2.0+-0.0	1	1.00854e+06	0	0	0	122	UBIP1_HUMAN	0.000101726	0	0	0		2	0	Unique
	UBP4_HUMAN	Ubiquitin carboxyl-terminal hydrolase 4 OS=Homo sapiens OX=9606 GN=USP4 PE=1 SV=3	109978	56.83+-0.0	2.0+-0.0	1	0	103734	0	0	56.	UBP4_HUMAN	0	1.1358e-05	0	0		2	0	Unique
	UBR5_HUMAN	E3 ubiquitin-protein ligase UBR5 OS=Homo sapiens OX=9606 GN=UBR5 PE=1 SV=2	312352	95.92+-0.0	2.0+-0.0	1	75559.9	181050	0	0	95.	UBR5_HUMAN	7.62127e-06	1.98235e-05	0	0		2	0	Unique
	UNK_HUMAN	RING finger protein unkempt homolog OS=Homo sapiens OX=9606 GN=UNK PE=1 SV=2	89796.4	73.35+-0.0	2.0+-0.0	1	220024	283015	0	0	73.	UNK_HUMAN	2.21924e-05	3.09878e-05	0	0		2	0	Unique
	VASP_HUMAN	Vasodilator-stimulated phosphoprotein OS=Homo sapiens OX=9606 GN=VASP PE=1 SV=3	39976.2	98.34+-0.0	2.0+-0.0	1	237797	351896	0	0	98.	VASP_HUMAN	2.39851e-05	3.85296e-05	0	0		2	0	Unique
	WAC2C_HUMAN	WASH complex subunit 2C OS=Homo sapiens OX=9606 GN=WASHC2C PE=1 SV=4	144995	97.74+-0.0	3.0+-0.0	1	0	1978514	0	0	97.	WAC2C_HUMAN	0	0.000216631	0	0		2	0	Unique
	WASC4_HUMAN	WASH complex subunit 4 OS=Homo sapiens OX=9606 GN=WASHC4 PE=1 SV=2	137343	123.82+-0.0	2.0+-0.0	1	755788	0	0	0	123	WASC4_HUMAN	7.62318e-05	0	0	0		2	0	Unique
	WASC5_HUMAN	WASH complex subunit 5 OS=Homo sapiens OX=9606 GN=WASHC5 PE=1 SV=1	135113	83.72+-0.0	2.0+-0.0	1	957077	532499	0	0	83.	WASC5_HUMAN	9.65346e-05	5.83041e-05	0	0		2	0	Unique
	WDR43_HUMAN	WD repeat-containing protein 43 OS=Homo sapiens OX=9606 GN=WDR43 PE=1 SV=3	75812.8	167.94+-0.0	2.0+-0.0	1	0	215147	0	0	167	WDR43_HUMAN	0	2.35568e-05	0	0		2	0	Unique
	WDR61_HUMAN	WD repeat-containing protein 61 OS=Homo sapiens OX=9606 GN=WDR61 PE=1 SV=1	33730.8	76.52+-0.0	2.0+-0.0	1	501398	868188	0	0	76.	WDR61_HUMAN	5.0573e-05	9.50593e-05	0	0		2	0	Unique
	WDR81_HUMAN	WD repeat-containing protein 81 OS=Homo sapiens OX=9606 GN=WDR81 PE=1 SV=2	213389	155.56+-62.3	3.0+-1.0	2	1.04072e+06	407091	0	0	155	WDR81_HUMAN	0.000104971	4.4573e-05	0	0		2	0	Unique
	XRCC1_HUMAN	DNA repair protein XRCC1 OS=Homo sapiens OX=9606 GN=XRCC1 PE=1 SV=2	69776.1	361.11+-11.07	10.5+-0.5	2	6448653	7.23467e+06	0	0	361	XRCC1_HUMAN	0.000650437	0.000792135	0	0		2	0	Unique
	YJ005_HUMAN	Uncharacterized protein FLJ45252 OS=Homo sapiens OX=9606 PE=2 SV=2	38180.7	77.1+-0.0	2.0+-0.0	1	296156	0	0	0	77.	YJ005_HUMAN	2.98715e-05	0	0	0		2	0	Unique
	YTHD3_HUMAN	YTH domain-containing family protein 3 OS=Homo sapiens OX=9606 GN=YTHDF3 PE=1 SV=1	63935.8	63.73+-0.0	2.0+-0.0	1	358749	131363	0	0	63.	YTHD3_HUMAN	3.61848e-05	1.43831e-05	0	0		2	0	Unique
	ZBT12_HUMAN	Zinc finger and BTB domain-containing protein 12 OS=Homo sapiens OX=9606 GN=ZBTB12 PE=1 SV=1	49971.5	151.83+-11.68	2.0+-0.0	2	125122	149720	0	0	151	ZBT12_HUMAN	1.26203e-05	1.63931e-05	0	0		2	0	Unique
	ZBT7B_HUMAN	Zinc finger and BTB domain-containing protein 7B OS=Homo sapiens OX=9606 GN=ZBTB7B PE=1 SV=2	58902.6	52.86+-0.0	2.0+-0.0	1	3.48208e+06	2335231	0	0	52.	ZBT7B_HUMAN	0.000351216	0.000255688	0	0		2	0	Unique
	ZBTB3_HUMAN	Zinc finger and BTB domain-containing protein 3 OS=Homo sapiens OX=9606 GN=ZBTB3 PE=1 SV=1	62358.9	111.19+-16.96	2.0+-0.0	2	1404607	1.0345e+06	0	0	111	ZBTB3_HUMAN	0.000141674	0.000113269	0	0		2	0	Unique
	ZCHC8_HUMAN	Zinc finger CCHC domain-containing protein 8 OS=Homo sapiens OX=9606 GN=ZCCHC8 PE=1 SV=2	79155.8	100.79+-0.0	2.0+-0.0	1	523057	855187	0	0	100	ZCHC8_HUMAN	5.27576e-05	9.36358e-05	0	0		2	0	Unique
	ZMYM5_HUMAN	Zinc finger MYM-type protein 5 OS=Homo sapiens OX=9606 GN=ZMYM5 PE=1 SV=4	76138.6	139.47+-0.0	3.0+-0.0	1	84089.3	862885	0	0	139	ZMYM5_HUMAN	8.48158e-06	9.44786e-05	0	0		2	0	Unique
	ZN131_HUMAN	Zinc finger protein 131 OS=Homo sapiens OX=9606 GN=ZNF131 PE=1 SV=2	72403.4	255.33+-17.04	3.0+-0.0	2	705067	1.24318e+06	0	0	255	ZN131_HUMAN	7.11158e-05	0.000136118	0	0		2	0	Unique
	ZN212_HUMAN	Zinc finger protein 212 OS=Homo sapiens OX=9606 GN=ZNF212 PE=1 SV=3	56325.1	87.58+-0.0	2.0+-0.0	1	0	130559	0	0	87.	ZN212_HUMAN	0	1.42951e-05	0	0		2	0	Unique
	ZN219_HUMAN	Zinc finger protein 219 OS=Homo sapiens OX=9606 GN=ZNF219 PE=1 SV=2	77912.9	65.19+-0.0	2.0+-0.0	1	359754	469717	0	0	65.	ZN219_HUMAN	3.62862e-05	5.14301e-05	0	0		2	0	Unique
	ZN346_HUMAN	Zinc finger protein 346 OS=Homo sapiens OX=9606 GN=ZNF346 PE=1 SV=1	33538.7	110.96+-0.0	2.0+-0.0	1	516887	323273	0	0	110	ZN346_HUMAN	5.21352e-05	3.53957e-05	0	0		2	0	Unique
	ZN395_HUMAN	Zinc finger protein 395 OS=Homo sapiens OX=9606 GN=ZNF395 PE=1 SV=2	55702.5	109.83+-0.0	2.0+-0.0	1	999678	377293	0	0	109	ZN395_HUMAN	0.000100831	4.13104e-05	0	0		2	0	Unique
	ZN787_HUMAN	Zinc finger protein 787 OS=Homo sapiens OX=9606 GN=ZNF787 PE=1 SV=4	41429	204.6+-75.45	5.5+-2.5	2	607725	2.86888e+06	0	0	204	ZN787_HUMAN	6.12976e-05	0.000314118	0	0		2	0	Unique
	ZNFX1_HUMAN	NFX1-type zinc finger-containing protein 1 OS=Homo sapiens OX=9606 GN=ZNFX1 PE=2 SV=2	225102	53.98+-0.0	2.0+-0.0	1	677650	373688	0	0	53.	ZNFX1_HUMAN	6.83504e-05	4.09157e-05	0	0		2	0	Unique
	ZNHI2_HUMAN	Zinc finger HIT domain-containing protein 2 OS=Homo sapiens OX=9606 GN=ZNHIT2 PE=1 SV=1	43541	113.39+-0.0	2.0+-0.0	1	420319	341660	0	0	113	ZNHI2_HUMAN	4.2395e-05	3.74089e-05	0	0		2	0	Unique
	ZUP1_HUMAN	Zinc finger-containing ubiquitin peptidase 1 OS=Homo sapiens OX=9606 GN=ZUP1 PE=1 SV=1	67170.8	92.81+-0.0	2.0+-0.0	1	207140	323638	0	0	92.	ZUP1_HUMAN	2.0893e-05	3.54357e-05	0	0		2	0	Unique
	ZYX_HUMAN	Zyxin OS=Homo sapiens OX=9606 GN=ZYX PE=1 SV=1	62435.6	92.8+-0.35	2.0+-0.0	2	334160	313444	0	0	92.	ZYX_HUMAN	3.37047e-05	3.43194e-05	0	0		2	0	Unique
	EDC4_HUMAN	Enhancer of mRNA-decapping protein 4 OS=Homo sapiens OX=9606 GN=EDC4 PE=1 SV=1	152992	252.67+-8.69	4.5+-0.5	2	2.91505e+06	2.20336e+06	1995.36	0	252	EDC4_HUMAN	0.000294023	0.00024125	2.40256e-06	0		1.99106	0.00893685	222.792
	TBB4B_HUMAN	Tubulin beta-4B chain OS=Homo sapiens OX=9606 GN=TUBB4B PE=1 SV=1	50255.2	1353.14+-111.84	54.8+-5.78	4	83775353	9.54285e+07	49903.7	34200.1	135	TBB4B_HUMAN	0.00844991	0.0104486	6.00878e-05	4.11344e-05		1.98934	0.0106551	186.704
	MYPT1_HUMAN	Protein phosphatase 1 regulatory subunit 12A OS=Homo sapiens OX=9606 GN=PPP1R12A PE=1 SV=1	115610	395.78+-32.32	7.0+-0.0	2	2.8598e+06	3.03741e+06	3736.75	0	395	MYPT1_HUMAN	0.000288451	0.000332571	4.49933e-06	0		1.98561	0.0143859	138.025
	MGAP_HUMAN	MAX gene-associated protein OS=Homo sapiens OX=9606 GN=MGA PE=1 SV=4	338118	206.19+-63.78	4.0+-2.0	2	491547	1.64434e+06	1659.22	0	206	MGAP_HUMAN	4.95794e-05	0.000180041	1.99783e-06	0		1.98275	0.017251	114.935
	NOLC1_HUMAN	Nucleolar and coiled-body phosphoprotein 1 OS=Homo sapiens OX=9606 GN=NOLC1 PE=1 SV=2	73559.6	1093.97+-42.37	40.5+-3.5	2	4.59561e+07	2.20259e+07	0	94970.9	109	NOLC1_HUMAN	0.00463532	0.00241164	0	0.000114227		1.9681	0.0319016	61.6927
	H2A1A_HUMAN	Histone H2A type 1-A OS=Homo sapiens OX=9606 GN=HIST1H2AA PE=1 SV=3	14224.9	123.8+-23.03	3.8+-0.83	3	1.62301e+06	3.19425e+06	0	7165.96	123	H2A1A_HUMAN	0.000163703	0.000349743	0	8.6189e-06		1.96698	0.0330185	59.5721
	UBP15_HUMAN	Ubiquitin carboxyl-terminal hydrolase 15 OS=Homo sapiens OX=9606 GN=USP15 PE=1 SV=3	113602	75.83+-26.86	3.0+-0.0	2	633981	603194	0	1943.85	75.	UBP15_HUMAN	6.39458e-05	6.60447e-05	0	2.33798e-06		1.96466	0.0353359	55.5996
	CBX3_HUMAN	Chromobox protein homolog 3 OS=Homo sapiens OX=9606 GN=CBX3 PE=1 SV=4	20969.4	134.22+-17.03	4.5+-0.5	2	2.65018e+06	2.93318e+06	3565.06	5242.98	134	CBX3_HUMAN	0.000267308	0.000321159	4.2926e-06	6.30602e-06		1.96462	0.0353839	55.5229
	SNRPA_HUMAN	U1 small nuclear ribonucleoprotein A OS=Homo sapiens OX=9606 GN=SNRPA PE=1 SV=3	31259.2	161.87+-0.0	4.0+-0.0	1	941758	2.01362e+06	5290.7	0	161	SNRPA_HUMAN	9.49894e-05	0.000220475	6.3704e-06	0		1.96041	0.0395881	49.5203
	RL26L_HUMAN	60S ribosomal protein L26-like 1 OS=Homo sapiens OX=9606 GN=RPL26L1 PE=1 SV=1	17245.5	243.8+-136.79	11.0+-10.61	3	2.39831e+06	3.10861e+06	10864.2	0	243	RL26L_HUMAN	0.000241903	0.000340366	1.30813e-05	0		1.95606	0.0439448	44.5116
	NAT10_HUMAN	RNA cytidine acetyltransferase OS=Homo sapiens OX=9606 GN=NAT10 PE=1 SV=2	116569	89.21+-17.09	2.0+-0.0	2	381933	937480	0	2893.63	89.	NAT10_HUMAN	3.85233e-05	0.000102646	0	3.48033e-06		1.95188	0.0481208	40.5621
	GRWD1_HUMAN	Glutamate-rich WD repeat-containing protein 1 OS=Homo sapiens OX=9606 GN=GRWD1 PE=1 SV=1	49787.3	98.91+-18.8	2.5+-0.5	2	470631	2.12095e+06	6227.53	0	98.	GRWD1_HUMAN	4.74697e-05	0.000232226	7.49841e-06	0		1.94778	0.0522184	37.3007
	ANR27_HUMAN	Ankyrin repeat domain-containing protein 27 OS=Homo sapiens OX=9606 GN=ANKRD27 PE=1 SV=2	118735	134.38+-26.84	2.0+-0.0	2	298248	465895	1902.29	0	134	ANR27_HUMAN	3.00825e-05	5.10115e-05	2.2905e-06	0		1.94506	0.0549382	35.4045
	LIMC1_HUMAN	LIM and calponin homology domains-containing protein 1 OS=Homo sapiens OX=9606 GN=LIMCH1 PE=1 SV=4	122818	490.95+-357.92	11.0+-8.03	3	8.4833e+06	8.29093e+06	7983.89	39631.4	490	LIMC1_HUMAN	0.000855659	0.000907787	9.6132e-06	4.76669e-05		1.93708	0.06292	30.7864
	P66B_HUMAN	Transcriptional repressor p66-beta OS=Homo sapiens OX=9606 GN=GATAD2B PE=1 SV=1	65562.1	405.9+-334.58	8.4+-8.06	4	8.89093e+06	1.03932e+07	36086.3	18826.4	405	P66B_HUMAN	0.000896775	0.00113797	4.34506e-05	2.26435e-05		1.93708	0.0629216	30.7856
	K1522_HUMAN	Uncharacterized protein KIAA1522 OS=Homo sapiens OX=9606 GN=KIAA1522 PE=1 SV=2	107429	252.82+-46.03	6.0+-0.0	2	1.66697e+06	2.86528e+06	13004.2	0	252	K1522_HUMAN	0.000168137	0.000313724	1.56581e-05	0		1.93706	0.0629445	30.774
	RRP1B_HUMAN	Ribosomal RNA processing protein 1 homolog B OS=Homo sapiens OX=9606 GN=RRP1B PE=1 SV=3	84774.3	83.49+-0.0	2.0+-0.0	1	824759	373010	3347.82	0	83.	RRP1B_HUMAN	8.31885e-05	4.08414e-05	4.03103e-06	0		1.93705	0.0629548	30.7688
	CAPR1_HUMAN	Caprin-1 OS=Homo sapiens OX=9606 GN=CAPRIN1 PE=1 SV=2	78489.1	539.16+-64.49	9.5+-1.5	2	5.95339e+06	7.02872e+06	17253.6	19802.6	539	CAPR1_HUMAN	0.000600482	0.000769585	2.07746e-05	2.38177e-05		1.93696	0.0630432	30.7243
	DC1I2_HUMAN	Cytoplasmic dynein 1 intermediate chain 2 OS=Homo sapiens OX=9606 GN=DYNC1I2 PE=1 SV=3	71811.3	134.45+-0.0	2.0+-0.0	1	289941	344620	0	1857.01	134	DC1I2_HUMAN	2.92446e-05	3.7733e-05	0	2.23353e-06		1.93546	0.0645425	29.9873
	AP2A2_HUMAN	AP-2 complex subunit alpha-2 OS=Homo sapiens OX=9606 GN=AP2A2 PE=1 SV=2	104807	138.53+-21.29	2.5+-0.5	2	763475	697312	4296.48	0	138	AP2A2_HUMAN	7.70071e-05	7.63497e-05	5.17328e-06	0		1.93473	0.0652656	29.644
	NOP56_HUMAN	Nucleolar protein 56 OS=Homo sapiens OX=9606 GN=NOP56 PE=1 SV=4	66407.9	103.04+-28.49	3.5+-0.5	2	921109	564787	4595.71	0	103	NOP56_HUMAN	9.29067e-05	6.18394e-05	5.53358e-06	0		1.93095	0.069049	27.9649
	HUWE1_HUMAN	E3 ubiquitin-protein ligase HUWE1 OS=Homo sapiens OX=9606 GN=HUWE1 PE=1 SV=3	485523	361.06+-82.07	4.0+-1.0	2	687845	910957	0	5030.75	361	HUWE1_HUMAN	6.93787e-05	9.97421e-05	0	6.05076e-06		1.93092	0.0690838	27.9504
	AHNK_HUMAN	Neuroblast differentiation-associated protein AHNAK OS=Homo sapiens OX=9606 GN=AHNAK PE=1 SV=2	629213	475.95+-401.59	11.0+-9.11	3	8.03509e+06	7.90866e+06	15409.9	37075.4	475	AHNK_HUMAN	0.000810451	0.000865931	1.85547e-05	4.45926e-05		1.9274	0.0726027	26.5472
	ADNP_HUMAN	Activity-dependent neuroprotector homeobox protein OS=Homo sapiens OX=9606 GN=ADNP PE=1 SV=1	124854	262.26+-134.27	3.5+-1.5	3	2.1128e+06	1.73041e+06	0	13432.3	262	ADNP_HUMAN	0.000213106	0.000189465	0	1.61558e-05		1.92283	0.0771663	24.918
	1433T_HUMAN	14-3-3 protein theta OS=Homo sapiens OX=9606 GN=YWHAQ PE=1 SV=1	28031.9	129.04+-41.48	2.0+-0.0	3	4.73381e+06	0	9643.45	8152.85	129	1433T_HUMAN	0.000477471	0	1.16114e-05	9.80588e-06		1.91414	0.0858603	22.2937
	TPR_HUMAN	Nucleoprotein TPR OS=Homo sapiens OX=9606 GN=TPR PE=1 SV=3	267530	605.04+-628.42	12.4+-11.94	4	13094169	9.62449e+06	43338.7	48288.1	605	TPR_HUMAN	0.00132073	0.0010538	5.21831e-05	5.80787e-05		1.91125	0.0887493	21.5354
	RPB1_HUMAN	DNA-directed RNA polymerase II subunit RPB1 OS=Homo sapiens OX=9606 GN=POLR2A PE=1 SV=2	218408	236.7+-133.09	4.0+-2.45	3	1.87176e+06	2.57818e+06	0	18869.8	236	RPB1_HUMAN	0.000188793	0.000282288	0	2.26957e-05		1.90807	0.091927	20.7564
	FIP1_HUMAN	Pre-mRNA 3'-end-processing factor FIP1 OS=Homo sapiens OX=9606 GN=FIP1L1 PE=1 SV=1	66600.6	387.47+-137.44	7.3+-3.86	3	1.73146e+07	1.55052e+07	95545.5	45487.3	387	FIP1_HUMAN	0.00174642	0.00169769	0.000115044	5.47101e-05		1.90605	0.0939459	20.2889
	SRRM2_HUMAN	Serine/arginine repetitive matrix protein 2 OS=Homo sapiens OX=9606 GN=SRRM2 PE=1 SV=2	300179	247.14+-222.4	7.6+-6.89	4	6.34301e+06	8.34948e+06	32575.4	32633.3	247	SRRM2_HUMAN	0.000639781	0.000914198	3.92233e-05	3.92499e-05		1.90386	0.0961415	19.8027
	SPTB2_HUMAN	Spectrin beta chain, non-erythrocytic 1 OS=Homo sapiens OX=9606 GN=SPTBN1 PE=1 SV=2	275237	597.31+-525.9	10.6+-8.52	4	1.24734e+07	1.24417e+07	48803.9	65530.2	597	SPTB2_HUMAN	0.00125811	0.00136226	5.87635e-05	7.88168e-05		1.90023	0.0997701	19.0461
	1433G_HUMAN	14-3-3 protein gamma OS=Homo sapiens OX=9606 GN=YWHAG PE=1 SV=2	28456	170.45+-41.89	4.8+-2.77	3	3.92944e+06	1.20401e+06	0	23325.3	170	1433G_HUMAN	0.000396339	0.000131829	0	2.80546e-05		1.89912	0.100876	18.8264
	BCLF1_HUMAN	Bcl-2-associated transcription factor 1 OS=Homo sapiens OX=9606 GN=BCLAF1 PE=1 SV=2	106173	115.42+-11.48	4.0+-0.0	2	680908	1.13168e+06	8526.52	0	115	BCLF1_HUMAN	6.86791e-05	0.00012391	1.02666e-05	0		1.89878	0.101221	18.7588
	IF4A3_HUMAN	Eukaryotic initiation factor 4A-III OS=Homo sapiens OX=9606 GN=EIF4A3 PE=1 SV=4	47126.3	114.59+-43.65	3.2+-1.47	4	1.42379e+07	1.14182e+07	77642.7	42037.8	114	IF4A3_HUMAN	0.00143609	0.00125019	9.34877e-05	5.05612e-05		1.89821	0.101789	18.6484
	ARBK1_HUMAN	Beta-adrenergic receptor kinase 1 OS=Homo sapiens OX=9606 GN=GRK2 PE=1 SV=2	80320.7	178.65+-70.09	3.7+-1.25	3	5.22467e+06	3.42596e+06	40348.4	0	178	ARBK1_HUMAN	0.000526981	0.000375114	4.85825e-05	0		1.89779	0.102206	18.5683
	ANR50_HUMAN	Ankyrin repeat domain-containing protein 50 OS=Homo sapiens OX=9606 GN=ANKRD50 PE=1 SV=4	157700	249.79+-55.37	5.5+-1.5	2	3.38044e+06	3.71494e+06	9773.22	23715.5	249	ANR50_HUMAN	0.000340965	0.000406754	1.17677e-05	2.8524e-05		1.89774	0.102262	18.5577
	EXOS6_HUMAN	Exosome complex component MTR3 OS=Homo sapiens OX=9606 GN=EXOSC6 PE=1 SV=1	28502.8	120.94+-9.96	3.0+-0.0	2	3.31144e+06	234128	16281.1	0	120	EXOS6_HUMAN	0.000334005	2.5635e-05	1.96036e-05	0		1.89662	0.103383	18.3456
	ARH40_HUMAN	Rho guanine nucleotide exchange factor 40 OS=Homo sapiens OX=9606 GN=ARHGEF40 PE=1 SV=3	166266	123.27+-15.7	3.0+-0.82	3	2.0788e+06	519695	8801.45	3387.33	123	ARH40_HUMAN	0.000209676	5.69022e-05	1.05976e-05	4.07413e-06		1.89567	0.104332	18.1695
	UACA_HUMAN	Uveal autoantigen with coiled-coil domains and ankyrin repeats OS=Homo sapiens OX=9606 GN=UACA PE=1 SV=2	163545	270.0+-15.94	6.0+-1.0	2	2.31206e+06	2.79481e+06	11932.2	13248.7	270	UACA_HUMAN	0.000233203	0.000306008	1.43673e-05	1.59349e-05		1.89359	0.106414	17.7944
	TRI33_HUMAN	E3 ubiquitin-protein ligase TRIM33 OS=Homo sapiens OX=9606 GN=TRIM33 PE=1 SV=3	124623	307.07+-145.46	6.0+-2.94	3	7.79226e+06	4.40131e+06	41366.5	18820.7	307	TRI33_HUMAN	0.000785958	0.000481906	4.98083e-05	2.26367e-05		1.8919	0.108102	17.501
	SMU1_HUMAN	WD40 repeat-containing protein SMU1 OS=Homo sapiens OX=9606 GN=SMU1 PE=1 SV=2	58134.5	384.8+-190.61	10.7+-6.18	3	7.72822e+06	6.89387e+06	45326.4	27917.7	384	SMU1_HUMAN	0.000779499	0.000754821	5.45764e-05	3.35781e-05		1.89133	0.108667	17.4049
	SEPT7_HUMAN	Septin-7 OS=Homo sapiens OX=9606 GN=SEPTIN7 PE=1 SV=2	50933.1	231.38+-191.58	6.3+-4.38	3	6.92033e+06	9.04131e+06	0	82648	231	SEPT7_HUMAN	0.000698011	0.000989947	0	9.94053e-05		1.88877	0.111231	16.9806
	PELP1_HUMAN	Proline-, glutamic acid- and leucine-rich protein 1 OS=Homo sapiens OX=9606 GN=PELP1 PE=1 SV=2	120879	92.61+-0.0	2.0+-0.0	1	343224	247095	3038.51	0	92.	PELP1_HUMAN	3.46189e-05	2.70548e-05	3.65859e-06	0		1.888	0.111999	16.8572
	RUXE_HUMAN	Small nuclear ribonucleoprotein E OS=Homo sapiens OX=9606 GN=SNRPE PE=1 SV=1	10853.7	107.36+-21.33	6.0+-2.83	3	1.13505e+07	9.43689e+06	83397.8	25617.1	107	RUXE_HUMAN	0.00114486	0.00103326	0.000100417	3.08111e-05		1.88635	0.11365	16.5979
	2AAA_HUMAN	Serine/threonine-protein phosphatase 2A 65 kDa regulatory subunit A alpha isoform OS=Homo sapiens OX=9606 GN=PPP2R1A PE=1 SV=4	66065.2	202.52+-92.95	4.0+-0.82	3	2.07488e+06	2.17657e+06	22420.6	0	202	2AAA_HUMAN	0.000209281	0.000238316	2.69961e-05	0		1.88623	0.113765	16.5801
	MAX_HUMAN	Protein max OS=Homo sapiens OX=9606 GN=MAX PE=1 SV=1	18263.9	131.95+-35.48	2.5+-0.5	2	2655928	2.10513e+06	14101	13507.9	131	MAX_HUMAN	0.000267887	0.000230494	1.69787e-05	1.62466e-05		1.875	0.125	15
	ACTA_HUMAN	Actin, aortic smooth muscle OS=Homo sapiens OX=9606 GN=ACTA2 PE=1 SV=1	42381	633.62+-118.63	46.7+-23.16	3	4.85937e+07	1.01066e+08	884262	0	633	ACTA_HUMAN	0.00490135	0.0110659	0.00106472	0		1.87497	0.125026	14.9967
	TTI1_HUMAN	TELO2-interacting protein 1 homolog OS=Homo sapiens OX=9606 GN=TTI1 PE=1 SV=3	123474	128.15+-0.0	2.0+-0.0	1	97807.1	624677	1762.39	2575.5	128	TTI1_HUMAN	9.86521e-06	6.83969e-05	2.12205e-06	3.0977e-06		1.87495	0.125051	14.9935
	P66A_HUMAN	Transcriptional repressor p66-alpha OS=Homo sapiens OX=9606 GN=GATAD2A PE=1 SV=1	68362.7	385.16+-277.65	9.2+-7.68	4	8.87404e+06	1.11764e+07	83079.4	34734	385	P66A_HUMAN	0.000895071	0.00122372	0.000100034	4.17766e-05		1.87454	0.125462	14.941
	EXOS2_HUMAN	Exosome complex component RRP4 OS=Homo sapiens OX=9606 GN=EXOSC2 PE=1 SV=2	32996.2	285.27+-77.0	4.0+-2.0	2	978277	2.00897e+06	0	17836.2	285	EXOS2_HUMAN	9.86729e-05	0.000219965	0	2.14526e-05		1.87384	0.126158	14.8531
	MY18A_HUMAN	Unconventional myosin-XVIIIa OS=Homo sapiens OX=9606 GN=MYO18A PE=1 SV=3	234168	129.63+-67.61	3.5+-1.5	2	2.00744e+06	469860	0	14233.8	129	MY18A_HUMAN	0.000202478	5.14457e-05	0	1.71198e-05		1.87368	0.126325	14.8322
	PP1A_HUMAN	Serine/threonine-protein phosphatase PP1-alpha catalytic subunit OS=Homo sapiens OX=9606 GN=PPP1CA PE=1 SV=1	38229.1	72.89+-0.0	2.0+-0.0	1	3098933	4148938	0	43660.8	72.	PP1A_HUMAN	0.000312571	0.000454274	0	5.25133e-05		1.87182	0.128182	14.6029
	SPAS2_HUMAN	MEthionine--tRNA ligase, cytoplasmic OS=Homo sapiens OX=9606 GN=MARS PE=1 SV=2	59849.7	219.79+-18.6	3.0+-0.0	2	1.25353e+06	694938	6339.82	5980.26	219	SPAS2_HUMAN	0.000126436	7.60898e-05	7.63362e-06	7.19279e-06		1.86357	0.136427	13.6598
	MRCKB_HUMAN	Serine/threonine-protein kinase MRCK beta OS=Homo sapiens OX=9606 GN=CDC42BPB PE=1 SV=2	196189	522.08+-436.98	11.2+-7.76	4	1.01229e+07	1.69011e+07	99805.2	76622.3	522	MRCKB_HUMAN	0.00102103	0.00185053	0.000120173	9.21579e-05		1.8623	0.137703	13.524
	PRP16_HUMAN	Pre-mRNA-splicing factor ATP-dependent RNA helicase PRP16 OS=Homo sapiens OX=9606 GN=DHX38 PE=1 SV=2	141270	339.88+-285.06	7.6+-6.97	4	3.91038e+06	5.8765e+06	38268.7	26769.7	339	PRP16_HUMAN	0.000394417	0.000643428	4.60784e-05	3.21974e-05		1.85974	0.140264	13.2588
	TFP11_HUMAN	Tuftelin-interacting protein 11 OS=Homo sapiens OX=9606 GN=TFIP11 PE=1 SV=1	97157.6	201.3+-42.27	3.0+-0.0	2	677255	693128	9166.41	0	201	TFP11_HUMAN	6.83106e-05	7.58917e-05	1.1037e-05	0		1.85781	0.142194	13.0653
	GRP75_HUMAN	Stress-70 protein, mitochondrial OS=Homo sapiens OX=9606 GN=HSPA9 PE=1 SV=2	73919.9	370.5+-374.12	7.2+-6.4	4	7.03007e+06	7.67688e+06	66677	34158.2	370	GRP75_HUMAN	0.00070908	0.000840553	8.02841e-05	4.1084e-05		1.85474	0.145264	12.7681
	ANKL2_HUMAN	Ankyrin repeat and LEM domain-containing protein 2 OS=Homo sapiens OX=9606 GN=ANKLE2 PE=1 SV=4	104905	233.05+-100.83	5.0+-1.41	3	3.24591e+06	3.1582e+06	35409.9	9593.52	233	ANKL2_HUMAN	0.000327395	0.000345796	4.26362e-05	1.15387e-05		1.85104	0.148962	12.4263
	DEFI6_HUMAN	Differentially expressed in FDCP 6 homolog OS=Homo sapiens OX=9606 GN=DEF6 PE=1 SV=1	74434.5	119.05+-1.3	2.0+-0.0	2	509511	649250	8623.87	0	119	DEFI6_HUMAN	5.13913e-05	7.10874e-05	1.03838e-05	0		1.84369	0.156309	11.7952
	RASF8_HUMAN	Ras association domain-containing protein 8 OS=Homo sapiens OX=9606 GN=RASSF8 PE=1 SV=2	48525.6	69.62+-0.0	2.0+-0.0	1	291326	83607.4	0	2721.66	69.	RASF8_HUMAN	2.93843e-05	9.1543e-06	0	3.27349e-06		1.84342	0.156581	11.7729
	H2A1D_HUMAN	Histone H2A type 1-D OS=Homo sapiens OX=9606 GN=HIST1H2AD PE=1 SV=2	14098.9	270.82+-74.19	9.8+-3.43	4	9.61547e+06	7958075	51744.3	78406.2	270	H2A1D_HUMAN	0.000969854	0.000871342	6.2304e-05	9.43035e-05		1.84322	0.15678	11.7568
	RAD50_HUMAN	DNA repair protein RAD50 OS=Homo sapiens OX=9606 GN=RAD50 PE=1 SV=1	154823	379.7+-297.44	8.0+-6.07	4	8.16282e+06	5.68114e+06	55589.6	48311.5	379	RAD50_HUMAN	0.000823335	0.000622037	6.6934e-05	5.81069e-05		1.84075	0.159246	11.5592
	PRPF3_HUMAN	U4/U6 small nuclear ribonucleoprotein Prp3 OS=Homo sapiens OX=9606 GN=PRPF3 PE=1 SV=2	77652	414.08+-12.63	8.5+-0.5	2	4.60318e+06	4.53565e+06	71510.6	0	414	PRPF3_HUMAN	0.000464295	0.000496616	8.61041e-05	0		1.83552	0.164475	11.1599
	SMD2_HUMAN	Small nuclear ribonucleoprotein Sm D2 OS=Homo sapiens OX=9606 GN=SNRPD2 PE=1 SV=1	13632.3	155.78+-16.24	6.2+-2.71	4	20867787	2.49973e+07	216474	168743	155	SMD2_HUMAN	0.00210481	0.00273699	0.000260651	0.000202956		1.82523	0.174768	10.4438
	MRCKA_HUMAN	Serine/threonine-protein kinase MRCK alpha OS=Homo sapiens OX=9606 GN=CDC42BPA PE=1 SV=1	199349	382.43+-77.31	7.0+-2.0	2	2.48805e+06	3.77638e+06	45214.8	9042.57	382	MRCKA_HUMAN	0.000250954	0.000413482	5.4442e-05	1.0876e-05		1.82099	0.179014	10.1723
	TRM11_HUMAN	tRNA (guanine(10)-N2)-methyltransferase homolog OS=Homo sapiens OX=9606 GN=TRMT11 PE=1 SV=1	53786.3	67.9+-0.0	2.0+-0.0	1	582092	1.05269e+06	14496.4	0	67.	TRM11_HUMAN	5.87121e-05	0.000115261	1.74547e-05	0		1.81764	0.182363	9.96712
	RHG05_HUMAN	Rho GTPase-activating protein 5 OS=Homo sapiens OX=9606 GN=ARHGAP5 PE=1 SV=2	173834	235.0+-46.99	6.0+-1.0	2	2.01358e+06	1.43823e+06	0	30490	235	RHG05_HUMAN	0.000203098	0.000157474	0	3.6672e-05		1.81537	0.184632	9.83235
	NEPRO_HUMAN	Nucleolus and neural progenitor protein OS=Homo sapiens OX=9606 GN=NEPRO PE=1 SV=3	65365.7	150.05+-30.61	2.5+-0.5	2	228462	1.0482e+06	0	11749.2	150	NEPRO_HUMAN	2.30436e-05	0.000114769	0	1.41314e-05		1.81399	0.186009	9.75219
	TCPE_HUMAN	T-complex protein 1 subunit epsilon OS=Homo sapiens OX=9606 GN=CCT5 PE=1 SV=1	60089	531.33+-311.92	11.2+-8.06	4	9.45242e+06	1.00337e+07	99797.8	79179.1	531	TCPE_HUMAN	0.000953408	0.00109861	0.000120164	9.52331e-05		1.81001	0.189994	9.52666
	ILF3_HUMAN	Interleukin enhancer-binding factor 3 OS=Homo sapiens OX=9606 GN=ILF3 PE=1 SV=3	95678.2	144.84+-20.16	2.5+-0.5	2	1.64055e+06	1.86408e+06	0	32580.5	144	ILF3_HUMAN	0.000165473	0.000204101	0	3.91864e-05		1.80827	0.191733	9.43117
	H2A1B_HUMAN	Histone H2A type 1-B/E OS=Homo sapiens OX=9606 GN=HIST1H2AB PE=1 SV=2	14127	209.2+-40.56	8.2+-2.32	4	4.59884e+07	3.98922e+07	434744	383858	209	H2A1B_HUMAN	0.00463857	0.00436786	0.000523464	0.000461687		1.8028	0.197196	9.14218
	MBD3_HUMAN	Methyl-CpG-binding domain protein 3 OS=Homo sapiens OX=9606 GN=MBD3 PE=1 SV=1	33051.4	262.74+-191.16	5.8+-4.66	4	6.95411e+06	4.80797e+06	55420.9	56571.5	262	MBD3_HUMAN	0.000701419	0.000526432	6.67309e-05	6.80416e-05		1.80219	0.197813	9.11054
	SLAI2_HUMAN	SLAIN motif-containing protein 2 OS=Homo sapiens OX=9606 GN=SLAIN2 PE=1 SV=2	62733.4	191.88+-56.2	4.3+-1.3	3	2.34516e+06	3.63471e+06	20964.1	37665.3	191	SLAI2_HUMAN	0.000236542	0.00039797	2.52423e-05	4.53022e-05		1.79989	0.200111	8.99448
	ILF2_HUMAN	Interleukin enhancer-binding factor 2 OS=Homo sapiens OX=9606 GN=ILF2 PE=1 SV=2	43263.3	283.53+-25.95	4.0+-0.0	2	568944	721033	12799.1	0	283	ILF2_HUMAN	5.7386e-05	7.89471e-05	1.54111e-05	0		1.79688	0.20312	8.8464
	ABLM1_HUMAN	Actin-binding LIM protein 1 OS=Homo sapiens OX=9606 GN=ABLIM1 PE=1 SV=3	89512.8	231.62+-6.84	5.0+-0.0	2	1.87326e+06	1.5175e+06	18790.6	15047.8	231	ABLM1_HUMAN	0.000188944	0.000166154	2.26253e-05	1.80989e-05		1.79423	0.20577	8.71958
	MTA1_HUMAN	Metastasis-associated protein MTA1 OS=Homo sapiens OX=9606 GN=MTA1 PE=1 SV=2	81419.5	252.18+-164.84	5.8+-3.87	4	7.60256e+06	3.68403e+06	64945.7	47084.7	252	MTA1_HUMAN	0.000766824	0.000403371	7.81995e-05	5.66314e-05		1.79337	0.206633	8.67898
	TR150_HUMAN	Thyroid hormone receptor-associated protein 3 OS=Homo sapiens OX=9606 GN=THRAP3 PE=1 SV=2	108658	404.0+-189.31	9.2+-5.6	4	1.28632e+07	1.18879e+07	84929.3	164538	404	TR150_HUMAN	0.00129743	0.00130163	0.000102261	0.000197898		1.79294	0.207063	8.65891
	ANKZ1_HUMAN	Ankyrin repeat and zinc finger domain-containing protein 1 OS=Homo sapiens OX=9606 GN=ANKZF1 PE=1 SV=1	81561.5	397.57+-259.66	6.8+-4.75	4	8.84409e+06	8257440	99846.3	72806.3	397	ANKZ1_HUMAN	0.00089205	0.00090412	0.000120222	8.75682e-05		1.79262	0.20738	8.64413
	FLNB_HUMAN	Filamin-B OS=Homo sapiens OX=9606 GN=FLNB PE=1 SV=2	280157	295.04+-159.11	6.3+-2.28	3	4.64664e+06	3596529	0	83321.9	295	FLNB_HUMAN	0.000468678	0.00039379	0	0.000100216		1.7918	0.208201	8.6061
	LIN54_HUMAN	Protein lin-54 homolog OS=Homo sapiens OX=9606 GN=LIN54 PE=1 SV=3	80812.6	156.53+-47.43	3.0+-1.0	2	1.39413e+06	432631	18730.6	0	156	LIN54_HUMAN	0.000140617	4.73694e-05	2.25531e-05	0		1.78576	0.214241	8.3353
	PP1RA_HUMAN	Serine/threonine-protein phosphatase 1 regulatory subunit 10 OS=Homo sapiens OX=9606 GN=PPP1R10 PE=1 SV=1	99338.1	673.17+-349.53	19.8+-13.24	4	2.77976e+07	2.36907e+07	237123	308122	673	PP1RA_HUMAN	0.00280377	0.00259393	0.000285513	0.000370595		1.78324	0.216759	8.22683
	HCFC1_HUMAN	Host cell factor 1 OS=Homo sapiens OX=9606 GN=HCFC1 PE=1 SV=2	210598	480.35+-231.68	11.0+-5.1	3	1.14465e+07	9.50628e+06	190805	31428.8	480	HCFC1_HUMAN	0.00115454	0.00104086	0.000229744	3.78012e-05		1.78274	0.217257	8.2057
	RHG12_HUMAN	Rho GTPase-activating protein 12 OS=Homo sapiens OX=9606 GN=ARHGAP12 PE=1 SV=1	96537.6	117.38+-8.0	2.5+-0.5	2	751191	1.97182e+06	29587.8	0	117	RHG12_HUMAN	7.57681e-05	0.000215898	3.56259e-05	0		1.7823	0.217701	8.18691
	GAB2_HUMAN	GRB2-associated-binding protein 2 OS=Homo sapiens OX=9606 GN=GAB2 PE=1 SV=1	74924.6	67.19+-0.0	2.0+-0.0	1	68175	214711	3108.21	0	67.	GAB2_HUMAN	6.8764e-06	2.35091e-05	3.74252e-06	0		1.78068	0.219322	8.119
	DDX23_HUMAN	Probable ATP-dependent RNA helicase DDX23 OS=Homo sapiens OX=9606 GN=DDX23 PE=1 SV=3	95866	246.04+-140.16	6.3+-3.09	3	5.06285e+06	5.89307e+06	74466.3	44303.7	246	DDX23_HUMAN	0.00051066	0.000645242	8.9663e-05	5.32865e-05		1.77988	0.220117	8.08608
	SCNM1_HUMAN	Sodium channel modifier 1 OS=Homo sapiens OX=9606 GN=SCNM1 PE=1 SV=1	26161.3	234.85+-99.1	4.8+-1.79	3	4.47336e+06	3.10829e+06	26920.2	54570.2	234	SCNM1_HUMAN	0.000451201	0.000340331	3.24139e-05	6.56346e-05		1.77956	0.220438	8.07286
	TUFT1_HUMAN	Tuftelin OS=Homo sapiens OX=9606 GN=TUFT1 PE=1 SV=1	44521.7	116.78+-45.9	2.5+-0.5	2	1.07986e+06	1447917	0	27653.9	116	TUFT1_HUMAN	0.000108919	0.000158535	0	3.32609e-05		1.77879	0.221212	8.04108
	EF1D_HUMAN	Elongation factor 1-delta OS=Homo sapiens OX=9606 GN=EEF1D PE=1 SV=5	31216.8	310.72+-236.24	6.4+-5.39	4	6.575e+06	7.41752e+06	109841	43501.4	310	EF1D_HUMAN	0.00066318	0.000812156	0.000132257	5.23215e-05		1.7776	0.222395	7.99299
	RRS1_HUMAN	Ribosome biogenesis regulatory protein homolog OS=Homo sapiens OX=9606 GN=RRS1 PE=1 SV=2	41225.2	91.92+-35.66	2.6+-0.8	4	1.67788e+06	2.17465e+06	33134.6	9346.57	91.	RRS1_HUMAN	0.000169237	0.000238106	3.98965e-05	1.12416e-05		1.77692	0.223076	7.96555
	PRC2C_HUMAN	Protein PRRC2C OS=Homo sapiens OX=9606 GN=PRRC2C PE=1 SV=4	317346	283.55+-53.45	8.0+-1.0	2	796179	1.90797e+06	9042.27	21263	283	PRC2C_HUMAN	8.03057e-05	0.000208907	1.08876e-05	2.55742e-05		1.77608	0.223916	7.93194
	CCM2_HUMAN	Cerebral cavernous malformations 2 protein OS=Homo sapiens OX=9606 GN=CCM2 PE=1 SV=1	49262.8	85.76+-0.0	2.0+-0.0	1	1157959	867631	0	22297.7	85.	CCM2_HUMAN	0.000116796	9.49983e-05	0	2.68187e-05		1.77521	0.224788	7.89728
	MCM4_HUMAN	DNA replication licensing factor MCM4 OS=Homo sapiens OX=9606 GN=MCM4 PE=1 SV=5	97067.9	152.54+-55.5	3.6+-1.62	4	1.0777e+06	1.55577e+06	16327.9	13070	152	MCM4_HUMAN	0.000108701	0.000170344	1.966e-05	1.572e-05		1.77495	0.225046	7.88708
	NOB1_HUMAN	RNA-binding protein NOB1 OS=Homo sapiens OX=9606 GN=NOB1 PE=1 SV=1	47044.9	262.59+-183.97	7.6+-5.71	4	1.8957e+07	1.77216e+07	210240	198122	262	NOB1_HUMAN	0.00191208	0.00194037	0.000253145	0.000238292		1.77373	0.226266	7.83916
	PACN3_HUMAN	Protein kinase C and casein kinase substrate in neurons protein 3 OS=Homo sapiens OX=9606 GN=PACSIN3 PE=1 SV=2	48799	63.11+-0.0	2.0+-0.0	1	151508	1.03918e+06	13803.7	0	63.	PACN3_HUMAN	1.52817e-05	0.000113781	1.66207e-05	0		1.77182	0.228176	7.76518
	HS71A_HUMAN	Heat shock 70 kDa protein 1A OS=Homo sapiens OX=9606 GN=HSPA1A PE=1 SV=1	70294.1	748.25+-312.85	18.6+-8.21	4	9.69574e+06	1.47494e+07	151911	131489	748	HS71A_HUMAN	0.000977951	0.00161493	0.000182912	0.000158149		1.76751	0.232493	7.60239
	SEP11_HUMAN	Septin-11 OS=Homo sapiens OX=9606 GN=SEPTIN11 PE=1 SV=3	49652.3	269.81+-63.91	5.0+-1.0	2	316877	894922	0	14223.5	269	SEP11_HUMAN	3.19614e-05	9.79864e-05	0	1.71074e-05		1.76733	0.232666	7.59602
	TCPZ_HUMAN	T-complex protein 1 subunit zeta OS=Homo sapiens OX=9606 GN=CCT6A PE=1 SV=3	58443.8	613.23+-301.83	16.6+-11.39	4	1.5003e+07	1.55968e+07	170847	182392	613	TCPZ_HUMAN	0.00151326	0.00170772	0.000205713	0.000219372		1.76683	0.233175	7.57725
	Z512B_HUMAN	Zinc finger protein 512B OS=Homo sapiens OX=9606 GN=ZNF512B PE=1 SV=1	98742	196.35+-96.82	3.5+-1.5	3	2807799	3.26213e+06	2648.58	67944.5	196	Z512B_HUMAN	0.000283206	0.000357176	3.18909e-06	8.17206e-05		1.76586	0.234139	7.54192
	FMNL1_HUMAN	Formin-like protein 1 OS=Homo sapiens OX=9606 GN=FMNL1 PE=1 SV=3	122518	62.29+-0.0	2.0+-0.0	1	1.059e+06	166571	13789.7	0	62.	FMNL1_HUMAN	0.000106815	1.82382e-05	1.66038e-05	0		1.76558	0.234423	7.53159
	CALD1_HUMAN	Caldesmon OS=Homo sapiens OX=9606 GN=CALD1 PE=1 SV=3	93232.4	137.75+-51.34	3.5+-1.66	3	1.83892e+06	2.69041e+06	17117.4	36054	137	CALD1_HUMAN	0.000185481	0.000294577	2.06107e-05	4.33641e-05		1.76481	0.235187	7.50387
	U520_HUMAN	U5 small nuclear ribonucleoprotein 200 kDa helicase OS=Homo sapiens OX=9606 GN=SNRNP200 PE=1 SV=2	246006	591.08+-396.22	13.4+-8.28	4	1.18975e+07	1.66674e+07	257043	78135.9	591	U520_HUMAN	0.00120003	0.00182494	0.0003095	9.39784e-05		1.76463	0.235371	7.49724
	PDIP3_HUMAN	Polymerase delta-interacting protein 3 OS=Homo sapiens OX=9606 GN=POLDIP3 PE=1 SV=2	46288.6	424.67+-200.01	9.7+-4.78	3	5.81399e+06	6.37296e+06	104933	38992.4	424	PDIP3_HUMAN	0.000586422	0.000697785	0.000126348	4.68983e-05		1.76226	0.237738	7.41262
	AP2S1_HUMAN	AP-2 complex subunit sigma OS=Homo sapiens OX=9606 GN=AP2S1 PE=1 SV=2	17177.8	46.17+-3.96	2.0+-0.0	2	244531	349873	0	7307.2	46.	AP2S1_HUMAN	2.46644e-05	3.83082e-05	0	8.78877e-06		1.75506	0.244945	7.16511
	ZBT10_HUMAN	Zinc finger and BTB domain-containing protein 10 OS=Homo sapiens OX=9606 GN=ZBTB10 PE=1 SV=2	95975.2	108.84+-15.04	2.0+-0.0	2	507525	1072582	20607.7	0	108	ZBT10_HUMAN	5.1191e-05	0.000117439	2.48132e-05	0		1.74346	0.256543	6.79597
	RBMX_HUMAN	RNA-binding motif protein, X chromosome OS=Homo sapiens OX=9606 GN=RBMX PE=1 SV=3	42306.3	296.02+-213.67	6.4+-4.45	4	3.36311e+06	6.54327e+06	67851.3	67680.8	296	RBMX_HUMAN	0.000339217	0.000716432	8.16981e-05	8.14035e-05		1.73235	0.267654	6.47234
	INT5_HUMAN	Integrator complex subunit 5 OS=Homo sapiens OX=9606 GN=INTS5 PE=1 SV=1	109239	73.27+-0.0	2.0+-0.0	1	122224	322290	0	6303.86	73.	INT5_HUMAN	1.2328e-05	3.5288e-05	0	7.582e-06		1.72528	0.27472	6.28013
	TSYL1_HUMAN	Testis-specific Y-encoded-like protein 1 OS=Homo sapiens OX=9606 GN=TSPYL1 PE=1 SV=3	49389.9	122.81+-17.97	2.0+-0.0	3	1.35859e+06	1275825	17195	19841.4	122	TSYL1_HUMAN	0.000137033	0.000139692	2.07041e-05	2.38644e-05		1.72257	0.277431	6.209
	RU17_HUMAN	U1 small nuclear ribonucleoprotein 70 kDa OS=Homo sapiens OX=9606 GN=SNRNP70 PE=1 SV=2	51582.8	300.34+-76.43	8.3+-4.38	3	9.48634e+06	1.15012e+07	169791	127987	300	RU17_HUMAN	0.00095683	0.00125928	0.000204441	0.000153937		1.72159	0.278408	6.18371
	PRS8_HUMAN	26S proteasome regulatory subunit 8 OS=Homo sapiens OX=9606 GN=PSMC5 PE=1 SV=1	45768.1	144.34+-8.12	2.5+-0.5	2	1.25025e+06	1.04935e+06	0	32692.1	144	PRS8_HUMAN	0.000126105	0.000114895	0	3.93206e-05		1.71946	0.280541	6.12909
	KLC4_HUMAN	Kinesin light chain 4 OS=Homo sapiens OX=9606 GN=KLC4 PE=1 SV=3	69053.8	201.08+-0.0	4.0+-0.0	1	925898	0	0	12993.6	201	KLC4_HUMAN	9.33897e-05	0	0	1.56281e-05		1.71329	0.286708	5.97575
	TFDP3_HUMAN	Transcription factor Dp family member 3 OS=Homo sapiens OX=9606 GN=TFDP3 PE=1 SV=1	45223.5	54.31+-3.18	2.0+-0.0	2	879632	436104	19079.9	0	54.	TFDP3_HUMAN	8.87232e-05	4.77497e-05	2.29737e-05	0		1.71183	0.288168	5.9404
	DIDO1_HUMAN	Death-inducer obliterator 1 OS=Homo sapiens OX=9606 GN=DIDO1 PE=1 SV=5	245434	758.26+-306.85	20.0+-11.97	4	2.25061e+07	1.53598e+07	281315	274622	758	DIDO1_HUMAN	0.00227005	0.00168177	0.000338725	0.000330303		1.71043	0.289569	5.90681
	LARP1_HUMAN	La-related protein 1 OS=Homo sapiens OX=9606 GN=LARP1 PE=1 SV=2	123833	468.32+-261.06	8.2+-6.05	4	6.38182e+06	7.46953e+06	98718.7	107804	468	LARP1_HUMAN	0.000643695	0.000817851	0.000118865	0.000129662		1.70934	0.290662	5.88085
	SCRIB_HUMAN	Protein scribble homolog OS=Homo sapiens OX=9606 GN=SCRIB PE=1 SV=4	175748	1212.29+-437.41	26.0+-12.82	4	3.63774e+07	3.06472e+07	491080	502781	121	SCRIB_HUMAN	0.00366916	0.00335561	0.000591297	0.000604723		1.70903	0.290974	5.87346
	PRS10_HUMAN	26S proteasome regulatory subunit 10B OS=Homo sapiens OX=9606 GN=PSMC6 PE=1 SV=1	44430.2	152.09+-31.44	2.5+-0.5	2	450876	259248	0	10517.7	152	PRS10_HUMAN	4.54771e-05	2.83855e-05	0	1.26502e-05		1.70755	0.292448	5.83883
	FXR2_HUMAN	Fragile X mental retardation syndrome-related protein 2 OS=Homo sapiens OX=9606 GN=FXR2 PE=1 SV=2	74520.1	154.74+-48.2	2.8+-0.75	4	3.09958e+06	3.62446e+06	11532.3	90496.5	154	FXR2_HUMAN	0.000312636	0.000396848	1.38858e-05	0.000108845		1.70505	0.29495	5.78081
	TCPQ_HUMAN	T-complex protein 1 subunit theta OS=Homo sapiens OX=9606 GN=CCT8 PE=1 SV=4	60152.7	416.04+-222.28	8.4+-4.32	4	13762504	6717734	96727.9	208813	416	TCPQ_HUMAN	0.00138814	0.000735535	0.000116468	0.000251151		1.70488	0.295122	5.77685
	NSE3_HUMAN	Non-structural maintenance of chromosomes element 3 homolog OS=Homo sapiens OX=9606 GN=NSMCE3 PE=1 SV=1	34343.8	104.12+-18.78	2.3+-0.43	3	2322145	2.01301e+06	17803.7	47831.6	104	NSE3_HUMAN	0.000234221	0.000220408	2.1437e-05	5.75297e-05		1.70402	0.29598	5.75722
	PR38A_HUMAN	Pre-mRNA-splicing factor 38A OS=Homo sapiens OX=9606 GN=PRPF38A PE=1 SV=1	37681.5	161.32+-10.51	2.5+-0.5	2	1558023	2.7369e+06	52061.4	14302	161	PR38A_HUMAN	0.000157148	0.000299668	6.26858e-05	1.72018e-05		1.7023	0.297697	5.71823
	NPM_HUMAN	Nucleophosmin OS=Homo sapiens OX=9606 GN=NPM1 PE=1 SV=2	32725.9	248.28+-98.37	7.0+-3.69	4	1.78576e+07	1.21825e+07	112552	343371	248	NPM_HUMAN	0.00180119	0.00133388	0.000135521	0.000412991		1.70219	0.297815	5.71558
	HNRL1_HUMAN	Heterogeneous nuclear ribonucleoprotein U-like protein 1 OS=Homo sapiens OX=9606 GN=HNRNPUL1 PE=1 SV=2	96249.5	235.27+-155.04	4.4+-3.01	4	3.2754e+06	2.53697e+06	45963.7	43220.8	235	HNRL1_HUMAN	0.00033037	0.000277777	5.53437e-05	5.19841e-05		1.69998	0.300018	5.66626
	WDR3_HUMAN	WD repeat-containing protein 3 OS=Homo sapiens OX=9606 GN=WDR3 PE=1 SV=1	107115	182.41+-33.04	3.4+-0.49	4	2.58364e+06	3.38268e+06	47439.1	46974.6	182	WDR3_HUMAN	0.000260596	0.000370375	5.71202e-05	5.64989e-05		1.69481	0.305186	5.55339
	BCOR_HUMAN	BCL-6 corepressor OS=Homo sapiens OX=9606 GN=BCOR PE=1 SV=1	193609	221.64+-0.0	5.0+-0.0	1	478613	1.54611e+06	17812.7	15091.1	221	BCOR_HUMAN	4.82748e-05	0.000169285	2.14478e-05	1.81509e-05		1.69203	0.307971	5.49413
	HNRPK_HUMAN	Heterogeneous nuclear ribonucleoprotein K OS=Homo sapiens OX=9606 GN=HNRNPK PE=1 SV=1	51229.5	351.12+-165.55	9.6+-6.68	4	9.7736e+06	6.53979e+06	81382	176577	351	HNRPK_HUMAN	0.000985804	0.000716052	9.799e-05	0.000212379		1.69152	0.308483	5.48334
	HDAC2_HUMAN	Histone deacetylase 2 OS=Homo sapiens OX=9606 GN=HDAC2 PE=1 SV=2	55899	196.04+-51.94	5.4+-1.85	4	1.00186e+06	8.79348e+06	98321.4	64017.2	196	HDAC2_HUMAN	0.000101052	0.000962812	0.000118386	7.6997e-05		1.68968	0.310318	5.44501
	SNUT1_HUMAN	U4/U6.U5 tri-snRNP-associated protein 1 OS=Homo sapiens OX=9606 GN=SART1 PE=1 SV=1	90371.3	387.3+-164.49	7.8+-3.49	4	6.51446e+06	8571768	141881	102382	387	SNUT1_HUMAN	0.000657074	0.000938536	0.000170835	0.00012314		1.68885	0.311153	5.42771
	SEP10_HUMAN	Septin-10 OS=Homo sapiens OX=9606 GN=SEPTIN10 PE=1 SV=2	53015.7	316.14+-192.75	6.0+-4.15	4	6.50462e+06	6628418	96140.3	118209	316	SEP10_HUMAN	0.000656081	0.000725756	0.00011576	0.000142176		1.6854	0.3146	5.35728
	CHD4_HUMAN	Chromodomain-helicase-DNA-binding protein 4 OS=Homo sapiens OX=9606 GN=CHD4 PE=1 SV=2	219407	910.97+-350.37	19.4+-9.37	4	1.52114e+07	1.89389e+07	332813	228461	910	CHD4_HUMAN	0.00153428	0.00207365	0.000400731	0.000274782		1.68459	0.315407	5.34102
	SNW1_HUMAN	SNW domain-containing protein 1 OS=Homo sapiens OX=9606 GN=SNW1 PE=1 SV=1	61513.5	485.99+-380.97	9.8+-7.98	4	1.36525e+07	1.18232e+07	158045	258151	485	SNW1_HUMAN	0.00137704	0.00129454	0.000190298	0.000310493		1.68428	0.315719	5.33474
	RBM14_HUMAN	RNA-binding protein 14 OS=Homo sapiens OX=9606 GN=RBM14 PE=1 SV=2	69620	177.6+-68.39	3.2+-1.17	4	2.63553e+06	2.44439e+06	46764.6	36860.3	177	RBM14_HUMAN	0.00026583	0.00026764	5.63081e-05	4.43339e-05		1.68257	0.317426	5.30067
	TCPD_HUMAN	T-complex protein 1 subunit delta OS=Homo sapiens OX=9606 GN=CCT4 PE=1 SV=4	58400.9	358.18+-202.26	7.4+-4.32	4	8.96438e+06	1.18392e+07	283199	64073.6	358	TCPD_HUMAN	0.000904183	0.00129629	0.000340992	7.70649e-05		1.68069	0.319307	5.26357
	SMD3_HUMAN	Small nuclear ribonucleoprotein Sm D3 OS=Homo sapiens OX=9606 GN=SNRPD3 PE=1 SV=1	14021.4	223.75+-10.44	8.5+-0.5	2	6.27976e+06	7.55031e+06	213297	20335.4	223	SMD3_HUMAN	0.000633402	0.000826695	0.000256825	2.44585e-05		1.67694	0.323058	5.19083
	UBP2L_HUMAN	Ubiquitin-associated protein 2-like OS=Homo sapiens OX=9606 GN=UBAP2L PE=1 SV=2	114579	319.38+-132.33	15.4+-13.22	4	6.6677e+06	4.76853e+06	83544.3	116853	319	UBP2L_HUMAN	0.000672531	0.000522114	0.000100594	0.000140546		1.6641	0.335899	4.95416
	NOTC2_HUMAN	Neurogenic locus notch homolog protein 2 OS=Homo sapiens OX=9606 GN=NOTCH2 PE=1 SV=3	279082	118.11+-0.0	2.0+-0.0	1	505807	0	8584.62	0	118	NOTC2_HUMAN	5.10177e-05	0	1.03365e-05	0		1.66305	0.336946	4.93567
	SPF45_HUMAN	Splicing factor 45 OS=Homo sapiens OX=9606 GN=RBM17 PE=1 SV=1	45162	487.7+-242.31	17.4+-14.43	4	1.68091e+07	2.26992e+07	273566	431881	487	SPF45_HUMAN	0.00169544	0.00248537	0.000329394	0.000519447		1.66246	0.337535	4.92531
	G3BP1_HUMAN	Ras GTPase-activating protein-binding protein 1 OS=Homo sapiens OX=9606 GN=G3BP1 PE=1 SV=1	52189.1	300.77+-171.52	6.2+-3.12	4	4.76358e+06	5.04741e+06	139455	36675.2	300	G3BP1_HUMAN	0.000480474	0.000552649	0.000167915	4.41113e-05		1.65944	0.340563	4.87262
	ZO1_HUMAN	Tight junction protein ZO-1 OS=Homo sapiens OX=9606 GN=TJP1 PE=1 SV=3	195682	724.65+-300.76	15.6+-8.38	4	1.57375e+07	1.34122e+07	266512	261507	724	ZO1_HUMAN	0.00158735	0.00146852	0.0003209	0.000314529		1.65572	0.344285	4.80914
	RS7_HUMAN	40S ribosomal protein S7 OS=Homo sapiens OX=9606 GN=RPS7 PE=1 SV=1	22113.3	125.9+-36.5	3.0+-0.82	3	2.74679e+06	2.13371e+06	70732.4	17885.8	125	RS7_HUMAN	0.000277052	0.000233623	8.51671e-05	2.15122e-05		1.6544	0.345602	4.78701
	K1958_HUMAN	Uncharacterized protein KIAA1958 OS=Homo sapiens OX=9606 GN=KIAA1958 PE=1 SV=1	80416.3	136.56+-32.08	3.5+-0.5	2	1.14273e+06	3.02204e+06	39782.5	37954.9	136	K1958_HUMAN	0.00011526	0.000330888	4.79011e-05	4.56504e-05		1.65332	0.34668	4.76901
	MCRI2_HUMAN	MAPK regulated corepressor interacting protein 2 OS=Homo sapiens OX=9606 GN=MCRIP2 PE=1 SV=2	17931.1	141.31+-35.91	2.0+-0.0	2	1.11689e+06	804864	0	35111.8	141	MCRI2_HUMAN	0.000112654	8.81258e-05	0	4.22309e-05		1.65244	0.347563	4.75435
	RBM6_HUMAN	RNA-binding protein 6 OS=Homo sapiens OX=9606 GN=RBM6 PE=1 SV=5	129192	423.56+-163.94	10.8+-5.56	4	7.17458e+06	8.15506e+06	126258	158424	423	RBM6_HUMAN	0.000723656	0.00089291	0.000152024	0.000190545		1.65029	0.349714	4.71896
	IF2A_HUMAN	Eukaryotic translation initiation factor 2 subunit 1 OS=Homo sapiens OX=9606 GN=EIF2S1 PE=1 SV=3	36374.5	75.55+-0.16	2.0+-0.0	2	955096	883826	17636.9	16620	75.	IF2A_HUMAN	9.63347e-05	9.67715e-05	2.12361e-05	1.99898e-05		1.64814	0.351859	4.68409
	SRRT_HUMAN	Serrate RNA effector molecule homolog OS=Homo sapiens OX=9606 GN=SRRT PE=1 SV=1	101060	434.8+-157.57	13.6+-6.5	4	1.56573e+07	1.23794e+07	194795	325994	434	SRRT_HUMAN	0.00157925	0.00135544	0.000234548	0.000392091		1.64809	0.351912	4.68323
	API5_HUMAN	Apoptosis inhibitor 5 OS=Homo sapiens OX=9606 GN=API5 PE=1 SV=3	59310	249.83+-163.71	4.8+-3.06	4	5.87403e+06	5.7905e+06	112031	106702	249	API5_HUMAN	0.000592478	0.000634011	0.000134893	0.000128336		1.64661	0.353395	4.65939
	ROA2_HUMAN	Heterogeneous nuclear ribonucleoproteins A2/B1 OS=Homo sapiens OX=9606 GN=HNRNPA2B1 PE=1 SV=2	37463.8	235.14+-62.02	4.3+-2.05	3	2.15084e+06	1.73325e+06	59576.3	13064.7	235	ROA2_HUMAN	0.000216942	0.000189776	7.17343e-05	1.57137e-05		1.64608	0.353921	4.65097
	RBM19_HUMAN	Probable RNA-binding protein 19 OS=Homo sapiens OX=9606 GN=RBM19 PE=1 SV=3	107722	575.15+-250.44	11.2+-5.78	4	1.03143e+07	8.25609e+06	116629	231855	575	RBM19_HUMAN	0.00104034	0.000903972	0.00014043	0.000278865		1.64521	0.354792	4.63711
	PSMD2_HUMAN	26S proteasome non-ATPase regulatory subunit 2 OS=Homo sapiens OX=9606 GN=PSMD2 PE=1 SV=3	100877	90.4+-42.72	2.3+-0.47	2	700316	697640	0	26553.3	90.	PSMD2_HUMAN	7.06366e-05	7.63857e-05	0	3.19371e-05		1.64308	0.35692	4.60349
	RFC2_HUMAN	Replication factor C subunit 2 OS=Homo sapiens OX=9606 GN=RFC2 PE=1 SV=3	39588.3	421.68+-113.08	8.6+-2.8	4	9.7799e+06	1.00368e+07	223704	155599	421	RFC2_HUMAN	0.00098644	0.00109895	0.000269356	0.000187148		1.64082	0.359185	4.56817
	STK38_HUMAN	Serine/threonine-protein kinase 38 OS=Homo sapiens OX=9606 GN=STK38 PE=1 SV=1	54497.5	97.79+-23.65	2.0+-0.0	3	1.12517e+06	1.1241e+06	40178.9	3269.27	97.	STK38_HUMAN	0.000113489	0.000123079	4.83784e-05	3.93213e-06		1.63784	0.362162	4.52239
	AFAD_HUMAN	Afadin OS=Homo sapiens OX=9606 GN=AFDN PE=1 SV=3	207702	1246.83+-537.58	24.8+-12.48	4	2.47021e+07	2.52678e+07	459779	525019	124	AFAD_HUMAN	0.00249155	0.00276661	0.000553609	0.000631469		1.63215	0.367851	4.43698
	IBTK_HUMAN	Inhibitor of Bruton tyrosine kinase OS=Homo sapiens OX=9606 GN=IBTK PE=1 SV=3	152371	170.55+-44.1	3.3+-0.94	3	909664	646400	21095.1	9363.19	170	IBTK_HUMAN	9.17523e-05	7.07754e-05	2.54001e-05	1.12616e-05		1.63189	0.368109	4.43317
	DDX42_HUMAN	ATP-dependent RNA helicase DDX42 OS=Homo sapiens OX=9606 GN=DDX42 PE=1 SV=1	103197	829.72+-321.19	16.8+-6.73	4	2.44256e+07	2.75239e+07	556670	491858	829	DDX42_HUMAN	0.00246367	0.00301364	0.000670272	0.000591585		1.62552	0.374485	4.34067
	SMHD1_HUMAN	Structural maintenance of chromosomes flexible hinge domain-containing protein 1 OS=Homo sapiens OX=9606 GN=SMCHD1 PE=1 SV=2	227942	474.12+-202.26	8.4+-3.88	4	5.62796e+06	5907573	96642.8	138033	474	SMHD1_HUMAN	0.000567659	0.000646829	0.000116365	0.00016602		1.6227	0.3773	4.30082
	GLYR1_HUMAN	Putative oxidoreductase GLYR1 OS=Homo sapiens OX=9606 GN=GLYR1 PE=1 SV=4	61079.2	120.67+-6.72	2.0+-0.0	2	578146	463317	11275.9	9840.69	120	GLYR1_HUMAN	5.83141e-05	5.07293e-05	1.35771e-05	1.18359e-05		1.62199	0.378011	4.29085
	ASCC3_HUMAN	Activating signal cointegrator 1 complex subunit 3 OS=Homo sapiens OX=9606 GN=ASCC3 PE=1 SV=3	252898	249.97+-55.36	5.0+-1.26	4	2344206	2.79164e+06	36915.3	68250.1	249	ASCC3_HUMAN	0.000236446	0.000305661	4.44488e-05	8.20882e-05		1.62151	0.378488	4.28418
	FLII_HUMAN	Protein flightless-1 homolog OS=Homo sapiens OX=9606 GN=FLII PE=1 SV=2	146142	126.55+-49.62	2.6+-0.8	4	817222	784074	17254.5	15429.2	126	FLII_HUMAN	8.24282e-05	8.58494e-05	2.07757e-05	1.85575e-05		1.62109	0.378913	4.27826
	ZO3_HUMAN	Tight junction protein ZO-3 OS=Homo sapiens OX=9606 GN=TJP3 PE=1 SV=3	101449	273.3+-90.16	6.8+-3.97	4	4.47637e+06	6.16967e+06	64212.1	156968	273	ZO3_HUMAN	0.000451504	0.000675527	7.73161e-05	0.000188794		1.61797	0.382029	4.2352
	ACLY_HUMAN	ATP-citrate synthase OS=Homo sapiens OX=9606 GN=ACLY PE=1 SV=3	121674	85.31+-22.12	2.0+-0.0	2	508387	1008228	31745.5	0	85.	ACLY_HUMAN	5.12779e-05	0.000110392	3.8224e-05	0		1.61756	0.382442	4.22955
	ZN574_HUMAN	Zinc finger protein 574 OS=Homo sapiens OX=9606 GN=ZNF574 PE=1 SV=2	101175	269.35+-175.81	5.0+-2.1	4	4.05312e+06	3.63317e+06	85881.8	72722.6	269	ZN574_HUMAN	0.000408814	0.000397802	0.000103408	8.74675e-05		1.61729	0.382711	4.22587
	RU1C_HUMAN	U1 small nuclear ribonucleoprotein C OS=Homo sapiens OX=9606 GN=SNRPC PE=1 SV=1	17552.3	134.79+-0.0	2.0+-0.0	1	127319	1.56294e+06	0	36214	134	RU1C_HUMAN	1.28419e-05	0.000171128	0	4.35566e-05		1.61713	0.38287	4.22371
	HMHA1_HUMAN	Rho GTPase-activating protein 45 OS=Homo sapiens OX=9606 GN=ARHGAP45 PE=1 SV=2	125848	370.07+-188.41	7.6+-4.13	4	6.57179e+06	7.63964e+06	160951	135929	370	HMHA1_HUMAN	0.000662857	0.000836476	0.000193797	0.000163489		1.61512	0.384878	4.19645
	SRGP1_HUMAN	SLIT-ROBO Rho GTPase-activating protein 1 OS=Homo sapiens OX=9606 GN=SRGAP1 PE=1 SV=1	125099	387.73+-183.96	6.8+-3.92	4	4.73125e+06	3.41406e+06	97268.9	72354.3	387	SRGP1_HUMAN	0.000477212	0.000373811	0.000117119	8.70245e-05		1.61306	0.386941	4.16875
	FA98B_HUMAN	Protein FAM98B OS=Homo sapiens OX=9606 GN=FAM98B PE=1 SV=2	45917.8	766.13+-170.42	21.0+-5.87	4	2.45715e+07	2.58536e+07	599816	460657	766	FA98B_HUMAN	0.00247838	0.00283075	0.000722223	0.000554058		1.61239	0.387608	4.15985
	ZN217_HUMAN	Zinc finger protein 217 OS=Homo sapiens OX=9606 GN=ZNF217 PE=1 SV=1	117081	302.67+-150.89	6.0+-3.35	4	3.85749e+06	3.81462e+06	54119.1	107836	302	ZN217_HUMAN	0.000389082	0.000417668	6.51635e-05	0.0001297		1.6109	0.389099	4.14008
	HSP7C_HUMAN	Heat shock cognate 71 kDa protein OS=Homo sapiens OX=9606 GN=HSPA8 PE=1 SV=1	71082.3	1390.78+-541.98	38.6+-17.94	4	9.61607e+07	8.80981e+07	1.77566e+06	2.11896e+06	139	HSP7C_HUMAN	0.00969915	0.009646	0.00213802	0.00254859		1.60996	0.390035	4.12774
	ZO2_HUMAN	Tight junction protein ZO-2 OS=Homo sapiens OX=9606 GN=TJP2 PE=1 SV=2	134104	1366.97+-630.09	37.0+-21.36	4	4.25905e+07	4.46112e+07	843602	1.00748e+06	136	ZO2_HUMAN	0.00429585	0.00488454	0.00101576	0.00121176		1.60948	0.390522	4.12136
	ZC3HF_HUMAN	Zinc finger CCCH domain-containing protein 15 OS=Homo sapiens OX=9606 GN=ZC3H15 PE=1 SV=1	48971.7	217.38+-79.14	4.0+-1.0	2	1498147	1.55616e+06	32516.7	32318.9	217	ZC3HF_HUMAN	0.000151109	0.000170386	3.91525e-05	3.88717e-05		1.60941	0.39059	4.12045
	ZN282_HUMAN	Zinc finger protein 282 OS=Homo sapiens OX=9606 GN=ZNF282 PE=1 SV=3	75331.9	85.6+-0.0	2.0+-0.0	1	389954	306856	14925.2	0	85.	ZN282_HUMAN	3.93323e-05	3.35982e-05	1.7971e-05	0		1.6046	0.395396	4.05823
	COPG1_HUMAN	Coatomer subunit gamma-1 OS=Homo sapiens OX=9606 GN=COPG1 PE=1 SV=1	98967	311.23+-152.57	5.8+-2.48	4	4.95404e+06	3.63277e+06	122346	61939.4	311	COPG1_HUMAN	0.000499684	0.000397758	0.000147314	7.44979e-05		1.60364	0.396357	4.04596
	PP1B_HUMAN	Serine/threonine-protein phosphatase PP1-beta catalytic subunit OS=Homo sapiens OX=9606 GN=PPP1CB PE=1 SV=3	37960.9	74.69+-4.78	2.0+-0.0	2	3946462	4343570	102356	77835.5	74.	PP1B_HUMAN	0.000398056	0.000475584	0.000123245	9.36171e-05		1.60227	0.397728	4.02856
	FUBP3_HUMAN	Far upstream element-binding protein 3 OS=Homo sapiens OX=9606 GN=FUBP3 PE=1 SV=2	61944.3	140.87+-98.12	2.8+-0.83	3	1464136	1.15603e+06	0	56890.6	140	FUBP3_HUMAN	0.000147679	0.000126576	0	6.84254e-05		1.60064	0.399355	4.00807
	ANR16_HUMAN	Ankyrin repeat domain-containing protein 16 OS=Homo sapiens OX=9606 GN=ANKRD16 PE=1 SV=1	40000.2	135.12+-45.95	2.0+-0.0	2	562792	217051	0	16926.4	135	ANR16_HUMAN	5.67654e-05	2.37653e-05	0	2.03583e-05		1.59642	0.403578	3.95567
	TBA1A_HUMAN	Tubulin alpha-1A chain OS=Homo sapiens OX=9606 GN=TUBA1A PE=1 SV=1	50787.9	1008.48+-51.18	37.3+-5.91	3	6.11734e+07	5.65093e+07	2.62908e+06	0	100	TBA1A_HUMAN	0.00617019	0.00618729	0.00316561	0		1.59214	0.407858	3.90366
	TOP2B_HUMAN	DNA topoisomerase 2-beta OS=Homo sapiens OX=9606 GN=TOP2B PE=1 SV=3	184122	590.15+-289.11	11.4+-5.28	4	6.02979e+06	8.47616e+06	199488	129993	590	TOP2B_HUMAN	0.000608188	0.000928068	0.000240199	0.00015635		1.58967	0.410335	3.87407
	MDC1_HUMAN	Mediator of DNA damage checkpoint protein 1 OS=Homo sapiens OX=9606 GN=MDC1 PE=1 SV=3	227669	373.0+-234.25	7.4+-4.59	4	6.0144e+06	1.07936e+07	266352	117851	373	MDC1_HUMAN	0.000606636	0.00118181	0.000320708	0.000141746		1.58909	0.410906	3.86729
	PRC2A_HUMAN	Protein PRRC2A OS=Homo sapiens OX=9606 GN=PRRC2A PE=1 SV=3	229180	265.57+-180.17	5.6+-4.03	4	3.86864e+06	3.48432e+06	132041	36737	265	PRC2A_HUMAN	0.000390206	0.000381503	0.000158988	4.41856e-05		1.58318	0.416816	3.79828
	KAT7_HUMAN	Histone acetyltransferase KAT7 OS=Homo sapiens OX=9606 GN=KAT7 PE=1 SV=1	71282.4	185.75+-120.42	3.6+-1.62	4	2.31818e+06	1.88327e+06	54280.3	42788.5	185	KAT7_HUMAN	0.000233821	0.000206202	6.53576e-05	5.14641e-05		1.58042	0.419584	3.76662
	G3BP2_HUMAN	Ras GTPase-activating protein-binding protein 2 OS=Homo sapiens OX=9606 GN=G3BP2 PE=1 SV=2	54144.8	262.17+-140.57	5.6+-2.8	4	3.03904e+06	3.9645e+06	32717.3	130833	262	G3BP2_HUMAN	0.00030653	0.000434079	3.93941e-05	0.00015736		1.5802	0.419803	3.76414
	SGF29_HUMAN	SAGA-associated factor 29 OS=Homo sapiens OX=9606 GN=SGF29 PE=1 SV=1	33445.3	116.35+-15.61	3.5+-0.5	2	1.51928e+06	1.66825e+06	31797.6	43740.5	116	SGF29_HUMAN	0.00015324	0.00018266	3.82867e-05	5.26091e-05		1.57405	0.425945	3.69544
	FXR1_HUMAN	Fragile X mental retardation syndrome-related protein 1 OS=Homo sapiens OX=9606 GN=FXR1 PE=1 SV=3	70020.1	321.04+-181.48	6.0+-2.53	4	4.69731e+06	1.76138e+06	116528	34021.5	321	FXR1_HUMAN	0.000473789	0.000192856	0.000140308	4.09196e-05		1.57251	0.427488	3.67849
	DOCK6_HUMAN	Dedicator of cytokinesis protein 6 OS=Homo sapiens OX=9606 GN=DOCK6 PE=1 SV=3	231296	197.0+-139.65	4.2+-2.56	4	1.16037e+06	2.85257e+06	67059.7	31782	197	DOCK6_HUMAN	0.00011704	0.000312333	8.07449e-05	3.8226e-05		1.56607	0.433928	3.60905
	AP2A1_HUMAN	AP-2 complex subunit alpha-1 OS=Homo sapiens OX=9606 GN=AP2A1 PE=1 SV=3	108561	118.34+-0.88	2.5+-0.5	2	549214	402328	0	22943.4	118	AP2A1_HUMAN	5.53959e-05	4.40515e-05	0	2.75953e-05		1.56557	0.434426	3.60378
	DDX24_HUMAN	ATP-dependent RNA helicase DDX24 OS=Homo sapiens OX=9606 GN=DDX24 PE=1 SV=1	96898.7	216.17+-126.96	5.6+-3.14	4	3.79317e+06	2.85013e+06	64407	95821.8	216	DDX24_HUMAN	0.000382595	0.000312065	7.75508e-05	0.00011525		1.5655	0.4345	3.60299
	FACD2_HUMAN	Fanconi anemia group D2 protein OS=Homo sapiens OX=9606 GN=FANCD2 PE=1 SV=2	165792	65.44+-12.46	2.0+-0.0	2	383172	301174	7536.15	9085.8	65.	FACD2_HUMAN	3.86483e-05	3.2976e-05	9.07409e-06	1.0928e-05		1.5634	0.436601	3.58084
	NU153_HUMAN	Nuclear pore complex protein Nup153 OS=Homo sapiens OX=9606 GN=NUP153 PE=1 SV=2	155440	362.6+-135.22	6.8+-3.12	4	5.26279e+06	2.82042e+06	48954.6	146233	362	NU153_HUMAN	0.000530825	0.000308812	5.8945e-05	0.000175883		1.56289	0.437107	3.57554
	SEPT2_HUMAN	Septin-2 OS=Homo sapiens OX=9606 GN=SEPTIN2 PE=1 SV=1	41689.3	618.12+-233.29	12.2+-6.82	4	1.3623e+07	1.28006e+07	360127	292756	618	SEPT2_HUMAN	0.00137407	0.00140156	0.00043362	0.000352114		1.55874	0.441255	3.53252
	SMRC2_HUMAN	SWI/SNF complex subunit SMARCC2 OS=Homo sapiens OX=9606 GN=SMARCC2 PE=1 SV=1	133196	509.26+-229.76	12.6+-6.34	4	6.63428e+06	7.57419e+06	175919	178159	509	SMRC2_HUMAN	0.00066916	0.00082931	0.000211819	0.000214282		1.5572	0.442801	3.5167
	ZN618_HUMAN	Zinc finger protein 618 OS=Homo sapiens OX=9606 GN=ZNF618 PE=1 SV=1	106600	68.84+-0.0	2.0+-0.0	1	196133	164015	4882.63	4043.07	68.	ZN618_HUMAN	1.97827e-05	1.79582e-05	5.87905e-06	4.86282e-06		1.55688	0.443121	3.51344
	FUBP2_HUMAN	Far upstream element-binding protein 2 OS=Homo sapiens OX=9606 GN=KHSRP PE=1 SV=4	73355.1	427.93+-148.56	6.8+-2.04	4	7.26167e+06	5.8116e+06	120805	203545	427	FUBP2_HUMAN	0.000732441	0.000636322	0.000145458	0.000244815		1.55626	0.443735	3.50719
	ELP1_HUMAN	Elongator complex protein 1 OS=Homo sapiens OX=9606 GN=ELP1 PE=1 SV=3	151813	123.61+-27.55	2.4+-0.8	4	944806	1.6859e+06	28178.7	38804.8	123	ELP1_HUMAN	9.52969e-05	0.000184592	3.39293e-05	4.66727e-05		1.55282	0.44718	3.47247
	RSMB_HUMAN	Small nuclear ribonucleoprotein-associated proteins B and B' OS=Homo sapiens OX=9606 GN=SNRPB PE=1 SV=2	24764.8	247.84+-46.77	6.4+-2.24	4	7246138	6.40992e+06	172304	172720	247	RSMB_HUMAN	0.000730874	0.000701832	0.000207467	0.00020774		1.55062	0.44938	3.45058
	PUF60_HUMAN	Poly(U)-binding-splicing factor PUF60 OS=Homo sapiens OX=9606 GN=PUF60 PE=1 SV=1	60008.7	944.39+-185.9	27.6+-9.77	4	7.34583e+07	5.94422e+07	1.70151e+06	1.71775e+06	944	PUF60_HUMAN	0.0074093	0.00650841	0.00204875	0.00206603		1.54363	0.456374	3.38237
	KC1A_HUMAN	Casein kinase I isoform alpha OS=Homo sapiens OX=9606 GN=CSNK1A1 PE=1 SV=2	39118	119.11+-28.85	3.4+-0.8	4	1.28452e+06	1.85155e+06	52598.7	30240.4	119	KC1A_HUMAN	0.000129561	0.000202729	6.33327e-05	3.63718e-05		1.5384	0.4616	3.33275
	CHD3_HUMAN	Chromodomain-helicase-DNA-binding protein 3 OS=Homo sapiens OX=9606 GN=CHD3 PE=1 SV=3	227989	611.45+-391.53	13.6+-9.39	4	1.60944e+07	2.11992e+07	146741	848362	611	CHD3_HUMAN	0.00162334	0.00232113	0.000176687	0.00102037		1.53436	0.465643	3.29514
	RS10_HUMAN	40S ribosomal protein S10 OS=Homo sapiens OX=9606 GN=RPS10 PE=1 SV=1	18885.9	157.08+-38.96	3.8+-1.3	3	2.20042e+06	1.6195e+06	0	101136	157	RS10_HUMAN	0.000221943	0.000177321	0	0.000121642		1.53296	0.467039	3.2823
	RPAC1_HUMAN	DNA-directed RNA polymerases I and III subunit RPAC1 OS=Homo sapiens OX=9606 GN=POLR1C PE=1 SV=1	39453.1	178.6+-34.95	3.7+-1.25	3	2303483	1748201	65834.7	42123.6	178	RPAC1_HUMAN	0.000232338	0.000191413	7.92699e-05	5.06644e-05		1.53066	0.469343	3.26128
	PHF6_HUMAN	PHD finger protein 6 OS=Homo sapiens OX=9606 GN=PHF6 PE=1 SV=1	42404.4	278.56+-97.96	6.0+-2.19	4	7383393	7.81231e+06	125603	285822	278	PHF6_HUMAN	0.000744718	0.000855382	0.000151236	0.000343774		1.52746	0.472539	3.23246
	ACTN1_HUMAN	Alpha-actinin-1 OS=Homo sapiens OX=9606 GN=ACTN1 PE=1 SV=2	103563	91.37+-39.52	2.0+-0.0	3	1064512	1096139	24550.2	34067.1	91.	ACTN1_HUMAN	0.000107371	0.000120018	2.95602e-05	4.09743e-05		1.52649	0.473508	3.22379
	SC23B_HUMAN	Protein transport protein Sec23B OS=Homo sapiens OX=9606 GN=SEC23B PE=1 SV=2	87392.9	377.81+-177.16	8.8+-6.37	4	7.75427e+06	6.80569e+06	178008	216083	377	SC23B_HUMAN	0.000782127	0.000745166	0.000214335	0.000259895		1.52613	0.47387	3.22057
	KPRB_HUMAN	Phosphoribosyl pyrophosphate synthase-associated protein 2 OS=Homo sapiens OX=9606 GN=PRPSAP2 PE=1 SV=1	41298.5	131.33+-45.84	3.0+-1.0	2	451112	522400	12892.5	13623	131	KPRB_HUMAN	4.55009e-05	5.71984e-05	1.55235e-05	1.63852e-05		1.5259	0.474098	3.21854
	NONO_HUMAN	Non-POU domain-containing octamer-binding protein OS=Homo sapiens OX=9606 GN=NONO PE=1 SV=4	54311.3	1663.42+-405.81	161.6+-105.31	4	1.81976e+08	2.02952e+08	5.04948e+06	5.61428e+06	166	NONO_HUMAN	0.0183549	0.0222215	0.00607996	0.00675261		1.51946	0.48054	3.16198
	SFSWA_HUMAN	Splicing factor, suppressor of white-apricot homolog OS=Homo sapiens OX=9606 GN=SFSWAP PE=1 SV=3	105157	181.24+-73.42	4.0+-1.79	4	2.45498e+06	2.58779e+06	99958.1	39801.5	181	SFSWA_HUMAN	0.000247619	0.000283341	0.000120357	4.78715e-05		1.51879	0.481211	3.15618
	TCOF_HUMAN	Treacle protein OS=Homo sapiens OX=9606 GN=TCOF1 PE=1 SV=3	152243	298.19+-242.3	10.6+-9.97	4	4.4063e+06	4.46265e+06	103597	142565	298	TCOF_HUMAN	0.000444436	0.000488622	0.000124739	0.000171471		1.51807	0.481929	3.14999
	TF3C4_HUMAN	General transcription factor 3C polypeptide 4 OS=Homo sapiens OX=9606 GN=GTF3C4 PE=1 SV=2	93235	309.59+-176.54	6.8+-2.48	4	5.19335e+06	4.59776e+06	83528.7	188609	309	TF3C4_HUMAN	0.000523821	0.000503416	0.000100575	0.000226851		1.51659	0.483405	3.13731
	OGT1_HUMAN	UDP-N-acetylglucosamine--peptide N-acetylglucosaminyltransferase 110 kDa subunit OS=Homo sapiens OX=9606 GN=OGT PE=1 SV=3	118104	170.15+-55.67	4.0+-0.63	4	3.20033e+06	2.0293e+06	70820.4	73879.9	170	OGT1_HUMAN	0.000322798	0.000222191	8.5273e-05	8.88595e-05		1.51571	0.484293	3.12973
	ZBT8A_HUMAN	Zinc finger and BTB domain-containing protein 8A OS=Homo sapiens OX=9606 GN=ZBTB8A PE=1 SV=2	50850.8	78.87+-7.42	2.0+-0.0	2	423508	609104	17630.9	11446.8	78.	ZBT8A_HUMAN	4.27167e-05	6.66917e-05	2.12289e-05	1.37677e-05		1.5153	0.4847	3.12626
	GNL3L_HUMAN	Guanine nucleotide-binding protein-like 3-like protein OS=Homo sapiens OX=9606 GN=GNL3L PE=1 SV=1	66215.9	156.5+-71.97	3.4+-1.36	4	2.50382e+06	1.87102e+06	76575.3	46400.2	156	GNL3L_HUMAN	0.000252545	0.000204861	9.22024e-05	5.58081e-05		1.51105	0.488954	3.09036
	UN45A_HUMAN	Protein unc-45 homolog A OS=Homo sapiens OX=9606 GN=UNC45A PE=1 SV=1	104266	75.26+-24.42	2.0+-0.0	3	1418374	1.07571e+06	0	70718.2	75.	UN45A_HUMAN	0.000143063	0.000117781	0	8.50567e-05		1.5082	0.491799	3.0667
	FUBP1_HUMAN	Far upstream element-binding protein 1 OS=Homo sapiens OX=9606 GN=FUBP1 PE=1 SV=3	67689.5	281.98+-142.2	5.4+-2.06	4	6.06037e+06	6.1426e+06	262921	84985.3	281	FUBP1_HUMAN	0.000611273	0.000672563	0.000316577	0.000102216		1.50806	0.491937	3.06556
	SMD1_HUMAN	Small nuclear ribonucleoprotein Sm D1 OS=Homo sapiens OX=9606 GN=SNRPD1 PE=1 SV=1	13273.4	236.93+-95.2	7.8+-2.71	4	1.77088e+07	1.67883e+07	278151	713359	236	SMD1_HUMAN	0.00178618	0.00183818	0.000334914	0.000857997		1.50474	0.495264	3.03825
	PWP2_HUMAN	Periodic tryptophan protein 2 homolog OS=Homo sapiens OX=9606 GN=PWP2 PE=2 SV=2	103357	111.34+-30.95	2.5+-0.5	2	471507	295893	8832.85	13100.7	111	PWP2_HUMAN	4.7558e-05	3.23978e-05	1.06354e-05	1.57569e-05		1.50366	0.496338	3.02951
	C1TM_HUMAN	Monofunctional C1-tetrahydrofolate synthase, mitochondrial OS=Homo sapiens OX=9606 GN=MTHFD1L PE=1 SV=1	106636	191.57+-81.62	4.0+-1.41	3	1.90882e+06	789098	76554.4	0	191	C1TM_HUMAN	0.000192531	8.63996e-05	9.21772e-05	0		1.50323	0.496768	3.02602
	SP20H_HUMAN	Transcription factor SPT20 homolog OS=Homo sapiens OX=9606 GN=SUPT20H PE=1 SV=2	86704.5	56.04+-3.16	2.0+-0.0	2	614572	440862	15159.6	15178.7	56.	SP20H_HUMAN	6.19881e-05	4.82707e-05	1.82533e-05	1.82563e-05		1.50249	0.497513	3.02
	HNRPF_HUMAN	Heterogeneous nuclear ribonucleoprotein F OS=Homo sapiens OX=9606 GN=HNRNPF PE=1 SV=3	45985	575.91+-89.4	12.0+-1.79	4	1.45407e+07	1.29142e+07	400982	394972	575	HNRPF_HUMAN	0.00146664	0.00141399	0.000482813	0.000475055		1.50092	0.499085	3.00733
	TAU_HUMAN	Microtubule-associated protein tau OS=Homo sapiens OX=9606 GN=MAPT PE=1 SV=5	79107.9	230.74+-122.27	4.3+-2.28	3	1.60135e+06	1.32304e+06	13775.6	71529.1	230	TAU_HUMAN	0.000161519	0.000144862	1.65869e-05	8.6032e-05		1.4982	0.501805	2.98561
	LUZP1_HUMAN	Leucine zipper protein 1 OS=Homo sapiens OX=9606 GN=LUZP1 PE=1 SV=2	120772	368.41+-40.62	7.4+-1.02	4	3.25015e+06	2.22698e+06	74090.6	86959.4	368	LUZP1_HUMAN	0.000327823	0.000243836	8.92106e-05	0.000104591		1.49363	0.506366	2.94972
	IF4G2_HUMAN	Eukaryotic translation initiation factor 4 gamma 2 OS=Homo sapiens OX=9606 GN=EIF4G2 PE=1 SV=1	102810	376.92+-104.77	7.4+-0.8	4	4.21536e+06	3.82463e+06	82770.8	155315	376	IF4G2_HUMAN	0.000425178	0.000418765	9.96622e-05	0.000186806		1.49316	0.506839	2.94603
	SMAP_HUMAN	Small acidic protein OS=Homo sapiens OX=9606 GN=SMAP PE=1 SV=1	20377.2	137.05+-20.36	2.3+-0.43	3	3.69475e+06	5.18313e+06	113190	153326	137	SMAP_HUMAN	0.000372667	0.000567509	0.000136289	0.000184413		1.4913	0.508697	2.93162
	SMCE1_HUMAN	SWI/SNF-related matrix-associated actin-dependent regulator of chromatin subfamily E member 1 OS=Homo sapiens OX=9606 GN=SMARCE1 PE=1 SV=2	46677.6	449.49+-110.29	9.0+-2.9	4	5.82652e+06	9.77108e+06	224236	246918	449	SMCE1_HUMAN	0.000587686	0.00106985	0.000269997	0.000296981		1.49025	0.509754	2.92346
	MISP_HUMAN	Mitotic interactor and substrate of PLK1 OS=Homo sapiens OX=9606 GN=MISP PE=1 SV=1	75482	530.99+-231.36	10.6+-5.71	4	7.74137e+06	1.04919e+07	259389	289497	530	MISP_HUMAN	0.000780825	0.00114878	0.000312323	0.000348194		1.48997	0.510028	2.92135
	EWS_HUMAN	RNA-binding protein EWS OS=Homo sapiens OX=9606 GN=EWSR1 PE=1 SV=1	68720.8	148.37+-56.37	3.4+-0.8	4	2146963	2.59749e+06	59752.2	82920.7	148	EWS_HUMAN	0.000216551	0.000284403	7.19461e-05	9.97333e-05		1.48953	0.510469	2.91796
	ING3_HUMAN	Inhibitor of growth protein 3 OS=Homo sapiens OX=9606 GN=ING3 PE=1 SV=2	47226.4	116.82+-0.0	3.0+-0.0	1	309340	695453	15622.2	15492.9	116	ING3_HUMAN	3.12013e-05	7.61462e-05	1.88102e-05	1.86341e-05		1.48278	0.517217	2.86685
	SNPC4_HUMAN	snRNA-activating protein complex subunit 4 OS=Homo sapiens OX=9606 GN=SNAPC4 PE=1 SV=1	160134	357.67+-127.25	7.4+-2.58	4	3.2309e+06	4.73639e+06	108939	138394	357	SNPC4_HUMAN	0.000325881	0.000518595	0.000131171	0.000166454		1.47881	0.521189	2.83738
	ZN638_HUMAN	Zinc finger protein 638 OS=Homo sapiens OX=9606 GN=ZNF638 PE=1 SV=2	221914	186.16+-91.32	3.4+-1.5	4	1.90833e+06	2.03748e+06	75881.6	46408	186	ZN638_HUMAN	0.000192481	0.000223087	9.13671e-05	5.58174e-05		1.47691	0.523088	2.82345
	AP2B1_HUMAN	AP-2 complex subunit beta OS=Homo sapiens OX=9606 GN=AP2B1 PE=1 SV=1	105398	102.19+-0.0	2.0+-0.0	1	439908	359895	15183.3	9487.27	102	AP2B1_HUMAN	4.43708e-05	3.94055e-05	1.82819e-05	1.14109e-05		1.47664	0.523363	2.82144
	ZFR_HUMAN	Zinc finger RNA-binding protein OS=Homo sapiens OX=9606 GN=ZFR PE=1 SV=2	118079	181.23+-21.21	2.2+-0.4	4	159315	313137	8352.97	6590.92	181	ZFR_HUMAN	1.60692e-05	3.42859e-05	1.00576e-05	7.92726e-06		1.47366	0.526335	2.79986
	MTCL1_HUMAN	Microtubule cross-linking factor 1 OS=Homo sapiens OX=9606 GN=MTCL1 PE=1 SV=5	210652	489.24+-244.26	9.4+-4.76	4	4.82577e+06	4.38208e+06	132455	155548	489	MTCL1_HUMAN	0.000486746	0.000479801	0.000159486	0.000187086		1.47214	0.527861	2.78888
	LUC7L_HUMAN	Putative RNA-binding protein Luc7-like 1 OS=Homo sapiens OX=9606 GN=LUC7L PE=1 SV=1	44100.5	431.14+-77.61	13.2+-2.93	4	2.43325e+07	2.10674e+07	940474	484346	431	LUC7L_HUMAN	0.00245427	0.00230671	0.0011324	0.000582549		1.47036	0.529639	2.77616
	ZN609_HUMAN	Zinc finger protein 609 OS=Homo sapiens OX=9606 GN=ZNF609 PE=1 SV=2	152352	158.02+-124.15	3.8+-2.23	4	2.43894e+06	1.8094e+06	74328.5	58710.4	158	ZN609_HUMAN	0.000246001	0.000198114	8.94971e-05	7.06142e-05		1.47003	0.529972	2.77379
	DAZP1_HUMAN	DAZ-associated protein 1 OS=Homo sapiens OX=9606 GN=DAZAP1 PE=1 SV=1	43584.1	64.08+-0.0	2.0+-0.0	1	386859	392565	24652.8	0	64.	DAZP1_HUMAN	3.90201e-05	4.29825e-05	2.96838e-05	0		1.46844	0.531556	2.76254
	ZBT40_HUMAN	Zinc finger and BTB domain-containing protein 40 OS=Homo sapiens OX=9606 GN=ZBTB40 PE=1 SV=4	140710	320.43+-33.08	6.4+-0.8	4	7.27772e+06	5.28408e+06	137277	261918	320	ZBT40_HUMAN	0.00073406	0.000578562	0.000165292	0.000315023		1.46421	0.535786	2.73284
	SMC4_HUMAN	Structural maintenance of chromosomes protein 4 OS=Homo sapiens OX=9606 GN=SMC4 PE=1 SV=2	147775	1155.78+-490.9	23.4+-13.79	4	2.01149e+07	2.01136e+07	706527	580935	115	SMC4_HUMAN	0.00202887	0.00220227	0.000850711	0.000698722		1.46392	0.536084	2.73076
	IMA1_HUMAN	Importin subunit alpha-1 OS=Homo sapiens OX=9606 GN=KPNA2 PE=1 SV=1	58168.1	378.02+-228.56	6.8+-4.31	4	4.26543e+06	3.11424e+06	141545	93279.6	378	IMA1_HUMAN	0.000430228	0.000340983	0.000170431	0.000112193		1.46363	0.536371	2.72876
	ZN143_HUMAN	Zinc finger protein 143 OS=Homo sapiens OX=9606 GN=ZNF143 PE=1 SV=2	69708.7	150.98+-39.51	2.6+-0.49	4	1049018	4.64716e+06	64001.3	123688	150	ZN143_HUMAN	0.000105808	0.000508824	7.70624e-05	0.000148766		1.46261	0.537392	2.72168
	TCPB_HUMAN	T-complex protein 1 subunit beta OS=Homo sapiens OX=9606 GN=CCT2 PE=1 SV=4	57794.3	1433.06+-308.61	31.8+-13.64	4	2.98747e+07	2.65843e+07	811086	1.00942e+06	143	TCPB_HUMAN	0.00301328	0.00291076	0.000976608	0.00121409		1.46007	0.539931	2.70418
	CTNA1_HUMAN	Catenin alpha-1 OS=Homo sapiens OX=9606 GN=CTNNA1 PE=1 SV=1	100693	291.26+-88.62	5.7+-1.25	3	1.62638e+06	1.83977e+06	87315.3	24964.6	291	CTNA1_HUMAN	0.000164043	0.000201439	0.000105134	3.00264e-05		1.46005	0.539947	2.70406
	SMC1A_HUMAN	Structural maintenance of chromosomes protein 1A OS=Homo sapiens OX=9606 GN=SMC1A PE=1 SV=2	143771	1254.39+-464.16	27.8+-6.34	4	2.90728e+07	2.53711e+07	903594	855484	125	SMC1A_HUMAN	0.0029324	0.00277792	0.001088	0.00102894		1.45909	0.540913	2.69745
	TBB5_HUMAN	Tubulin beta chain OS=Homo sapiens OX=9606 GN=TUBB PE=1 SV=2	50095.1	1395.13+-117.38	55.4+-6.37	4	5.32407e+07	2.61497e+07	1.04381e+06	1.54173e+06	139	TBB5_HUMAN	0.00537006	0.00286317	0.00125682	0.00185433		1.45151	0.548492	2.64636
	IMB1_HUMAN	Importin subunit beta-1 OS=Homo sapiens OX=9606 GN=KPNB1 PE=1 SV=2	98419.5	260.76+-40.61	5.8+-0.98	4	2.47435e+06	2.06276e+06	51799.4	97592.7	260	IMB1_HUMAN	0.000249573	0.000225855	6.23703e-05	0.00011738		1.45129	0.548707	2.64493
	PKHA7_HUMAN	Pleckstrin homology domain-containing family A member 7 OS=Homo sapiens OX=9606 GN=PLEKHA7 PE=1 SV=2	127626	109.58+-0.0	3.0+-0.0	1	1.02e+06	734037	58418.6	0	109	PKHA7_HUMAN	0.000102881	8.03708e-05	7.03404e-05	0		1.44525	0.554752	2.60522
	NSF_HUMAN	Vesicle-fusing ATPase OS=Homo sapiens OX=9606 GN=NSF PE=1 SV=3	83055.3	140.53+-65.85	2.5+-0.5	2	1.1881e+06	357899	38912.9	12105.8	140	NSF_HUMAN	0.000119837	3.91869e-05	4.68541e-05	1.45603e-05		1.4428	0.557203	2.58936
	SWAHC_HUMAN	Ankyrin repeat domain-containing protein SOWAHC OS=Homo sapiens OX=9606 GN=SOWAHC PE=1 SV=1	55923.2	181.74+-101.0	3.7+-1.7	3	1.96174e+06	1.95078e+06	78923	53199	181	SWAHC_HUMAN	0.000197868	0.000213594	9.50292e-05	6.39854e-05		1.44252	0.557479	2.58758
	CLH1_HUMAN	Clathrin heavy chain 1 OS=Homo sapiens OX=9606 GN=CLTC PE=1 SV=5	193260	292.19+-25.11	6.2+-0.4	4	3.40108e+06	5.01205e+06	158516	129590	292	CLH1_HUMAN	0.000343047	0.000548777	0.000190865	0.000155865		1.4401	0.559895	2.5721
	SRS11_HUMAN	Serine/arginine-rich splicing factor 11 OS=Homo sapiens OX=9606 GN=SRSF11 PE=1 SV=1	53624.2	542.94+-192.31	21.6+-10.54	4	3.45165e+07	3.03874e+07	910237	1.29639e+06	542	SRS11_HUMAN	0.00348147	0.00332716	0.00109599	0.00155924		1.43887	0.56113	2.56423
	PRP19_HUMAN	Pre-mRNA-processing factor 19 OS=Homo sapiens OX=9606 GN=PRPF19 PE=1 SV=1	55602.5	429.89+-187.28	9.4+-4.59	4	1.06908e+07	1.30927e+07	427952	391924	429	PRP19_HUMAN	0.00107831	0.00143354	0.000515287	0.000471388		1.43595	0.564052	2.54577
	SMC3_HUMAN	Structural maintenance of chromosomes protein 3 OS=Homo sapiens OX=9606 GN=SMC3 PE=1 SV=2	141853	1273.18+-394.25	25.6+-9.65	4	2.08037e+07	1.7186e+07	560706	743074	127	SMC3_HUMAN	0.00209834	0.00188173	0.000675131	0.000893736		1.43453	0.565466	2.53691
	ZNF8_HUMAN	Zinc finger protein 8 OS=Homo sapiens OX=9606 GN=ZNF8 PE=1 SV=2	66241	94.66+-4.43	2.0+-0.0	2	574205	694700	22794.6	21166.7	94.	ZNF8_HUMAN	5.79165e-05	7.60638e-05	2.74463e-05	2.54584e-05		1.43383	0.566174	2.53248
	SMC2_HUMAN	Structural maintenance of chromosomes protein 2 OS=Homo sapiens OX=9606 GN=SMC2 PE=1 SV=2	136085	1024.68+-322.46	22.4+-7.47	4	2.29217e+07	2.03585e+07	681307	813981	102	SMC2_HUMAN	0.00231197	0.00222909	0.000820345	0.00097902		1.43242	0.567585	2.5237
	DRG1_HUMAN	Developmentally-regulated GTP-binding protein 1 OS=Homo sapiens OX=9606 GN=DRG1 PE=1 SV=1	40801.9	271.58+-30.42	5.4+-0.49	4	2.74843e+06	3.78041e+06	99928.8	127807	271	DRG1_HUMAN	0.000277217	0.000413923	0.000120322	0.00015372		1.43214	0.567855	2.52202
	RS5_HUMAN	40S ribosomal protein S5 OS=Homo sapiens OX=9606 GN=RPS5 PE=1 SV=4	23033.1	102.9+-6.4	2.0+-0.0	3	417186	697237	0	39056.9	102	RS5_HUMAN	4.2079e-05	7.63416e-05	0	4.69759e-05		1.43196	0.568039	2.52088
	HNRPC_HUMAN	Heterogeneous nuclear ribonucleoproteins C1/C2 OS=Homo sapiens OX=9606 GN=HNRNPC PE=1 SV=4	33706.6	168.92+-89.51	3.7+-1.7	3	1.57339e+06	2.26025e+06	84420.8	50524.9	168	HNRPC_HUMAN	0.000158699	0.000247478	0.000101649	6.07691e-05		1.4287	0.571296	2.50081
	SMCA4_HUMAN	Transcription activator BRG1 OS=Homo sapiens OX=9606 GN=SMARCA4 PE=1 SV=2	185100	1152.17+-388.1	29.2+-8.49	4	2.9974e+07	2.42258e+07	640471	1.26267e+06	115	SMCA4_HUMAN	0.0030233	0.00265252	0.000771174	0.00151869		1.42507	0.574932	2.47867
	KIF7_HUMAN	Kinesin-like protein KIF7 OS=Homo sapiens OX=9606 GN=KIF7 PE=1 SV=2	151407	204.98+-67.91	4.4+-1.36	4	954764	2.38974e+06	70829	50448.8	204	KIF7_HUMAN	9.63012e-05	0.000261657	8.52834e-05	6.06776e-05		1.4207	0.579304	2.45242
	ROA3_HUMAN	Heterogeneous nuclear ribonucleoprotein A3 OS=Homo sapiens OX=9606 GN=HNRNPA3 PE=1 SV=2	39798.7	89.35+-0.0	2.0+-0.0	1	608365	757180	0	49036.7	89.	ROA3_HUMAN	6.13621e-05	8.29048e-05	0	5.89791e-05		1.41963	0.580372	2.44607
	PCBP2_HUMAN	Poly(rC)-binding protein 2 OS=Homo sapiens OX=9606 GN=PCBP2 PE=1 SV=1	38954.7	407.29+-92.65	9.4+-3.67	4	1.39017e+07	9.56144e+06	203163	632342	407	PCBP2_HUMAN	0.00140218	0.0010469	0.000244623	0.000760552		1.41801	0.581992	2.43647
	DLG1_HUMAN	Disks large homolog 1 OS=Homo sapiens OX=9606 GN=DLG1 PE=1 SV=2	100678	96.88+-25.27	2.0+-0.0	2	139417	531831	0	25010.6	96.	DLG1_HUMAN	1.40621e-05	5.8231e-05	0	3.00816e-05		1.41232	0.587677	2.40323
	ZBT7A_HUMAN	Zinc finger and BTB domain-containing protein 7A OS=Homo sapiens OX=9606 GN=ZBTB7A PE=1 SV=1	62199.1	283.42+-52.98	12.0+-1.0	2	2.89496e+06	3.66577e+06	125184	115238	283	ZBT7A_HUMAN	0.000291997	0.000401371	0.000150731	0.000138604		1.41114	0.588855	2.39642
	MCM3_HUMAN	DNA replication licensing factor MCM3 OS=Homo sapiens OX=9606 GN=MCM3 PE=1 SV=3	91551.3	392.26+-154.84	7.6+-3.2	4	3.11906e+06	4.13272e+06	124942	141598	392	MCM3_HUMAN	0.0003146	0.000452498	0.00015044	0.000170308		1.41031	0.589694	2.39159
	KHDR1_HUMAN	KH domain-containing, RNA-binding, signal transduction-associated protein 1 OS=Homo sapiens OX=9606 GN=KHDRBS1 PE=1 SV=1	48311.2	380.64+-65.26	11.8+-3.82	4	6.96595e+06	1.4595e+07	351873	454527	380	KHDR1_HUMAN	0.000702614	0.00159803	0.000423682	0.000546684		1.40669	0.593312	2.37091
	SREK1_HUMAN	Splicing regulatory glutamine/lysine-rich protein 1 OS=Homo sapiens OX=9606 GN=SREK1 PE=1 SV=1	59402	423.29+-129.27	8.6+-2.87	4	6.44266e+06	7.01443e+06	249839	247794	423	SREK1_HUMAN	0.000649832	0.000768021	0.000300824	0.000298035		1.4061	0.593897	2.36759
	U2AF2_HUMAN	Splicing factor U2AF 65 kDa subunit OS=Homo sapiens OX=9606 GN=U2AF2 PE=1 SV=4	53809.3	617.22+-130.94	39.2+-0.98	4	5.9242e+07	4.28653e+07	1.73527e+06	2.02465e+06	617	U2AF2_HUMAN	0.00597538	0.00469338	0.00208939	0.00243516		1.4044	0.595597	2.35798
	EXOS9_HUMAN	Exosome complex component RRP45 OS=Homo sapiens OX=9606 GN=EXOSC9 PE=1 SV=3	49545.3	86.1+-0.0	2.0+-0.0	1	195862	539080	0	28039.1	86.	EXOS9_HUMAN	1.97554e-05	5.90247e-05	0	3.37242e-05		1.40048	0.599518	2.33601
	FA98A_HUMAN	Protein FAM98A OS=Homo sapiens OX=9606 GN=FAM98A PE=1 SV=2	55694.4	367.04+-137.85	10.4+-3.67	4	2.60697e+07	1.71e+07	454056	1.15457e+06	367	FA98A_HUMAN	0.0026295	0.00187231	0.000546717	0.00138867		1.39869	0.601313	2.32605
	AEBP2_HUMAN	Zinc finger protein AEBP2 OS=Homo sapiens OX=9606 GN=AEBP2 PE=1 SV=2	54946.2	111.9+-0.0	2.0+-0.0	1	92404.8	627450	0	28180.7	111	AEBP2_HUMAN	9.32031e-06	6.87005e-05	0	3.38945e-05		1.39428	0.605717	2.30187
	RENT1_HUMAN	Regulator of nonsense transcripts 1 OS=Homo sapiens OX=9606 GN=UPF1 PE=1 SV=2	125578	173.76+-46.38	4.0+-1.26	4	4.58576e+06	2.05759e+06	159849	88628.8	173	RENT1_HUMAN	0.000462537	0.000225288	0.000192471	0.000106599		1.39392	0.606081	2.29989
	CWC25_HUMAN	Pre-mRNA-splicing factor CWC25 homolog OS=Homo sapiens OX=9606 GN=CWC25 PE=1 SV=1	49674	72.92+-2.97	2.0+-0.0	2	338076	330945	0	25826.8	72.	CWC25_HUMAN	3.40996e-05	3.62357e-05	0	3.10633e-05		1.3873	0.612697	2.26426
	PHF3_HUMAN	PHD finger protein 3 OS=Homo sapiens OX=9606 GN=PHF3 PE=1 SV=3	231563	538.1+-258.61	11.0+-2.97	4	7.68551e+06	5.41174e+06	354683	147239	538	PHF3_HUMAN	0.000775191	0.00059254	0.000427065	0.000177093		1.38723	0.61277	2.26387
	RSRC2_HUMAN	Arginine/serine-rich coiled-coil protein 2 OS=Homo sapiens OX=9606 GN=RSRC2 PE=1 SV=1	50586.3	493.4+-118.96	15.8+-7.41	4	2.66912e+07	2.08365e+07	867290	961662	493	RSRC2_HUMAN	0.00269218	0.00228142	0.00104428	0.00115664		1.38646	0.613539	2.25978
	DHX8_HUMAN	ATP-dependent RNA helicase DHX8 OS=Homo sapiens OX=9606 GN=DHX8 PE=1 SV=1	140082	260.81+-53.98	6.0+-0.63	4	1.88353e+06	1.61364e+06	73047.6	61995.9	260	DHX8_HUMAN	0.000189981	0.000176679	8.79548e-05	7.45659e-05		1.38576	0.614235	2.25608
	LMNA_HUMAN	Prelamin-A/C OS=Homo sapiens OX=9606 GN=LMNA PE=1 SV=1	74379.8	1893.12+-337.29	49.6+-20.82	4	5.73795e+07	5.54709e+07	2.34545e+06	2.03019e+06	189	LMNA_HUMAN	0.00578753	0.00607359	0.00282409	0.00244182		1.38508	0.614925	2.25243
	SPTN1_HUMAN	Spectrin alpha chain, non-erythrocytic 1 OS=Homo sapiens OX=9606 GN=SPTAN1 PE=1 SV=3	285163	552.5+-276.69	11.2+-5.04	4	5.10158e+06	3.16312e+06	160881	157414	552	SPTN1_HUMAN	0.000514565	0.000346335	0.000193713	0.00018933		1.38415	0.615853	2.24753
	KI67_HUMAN	Proliferation marker protein Ki-67 OS=Homo sapiens OX=9606 GN=MKI67 PE=1 SV=2	360698	2108.09+-737.31	44.4+-14.02	4	3.1741e+07	3.76109e+07	1.3378e+06	1.38253e+06	210	KI67_HUMAN	0.00320152	0.00411807	0.00161081	0.00166285		1.38194	0.618065	2.23591
	AP3D1_HUMAN	AP-3 complex subunit delta-1 OS=Homo sapiens OX=9606 GN=AP3D1 PE=1 SV=1	131159	172.07+-22.77	3.5+-0.5	2	1.05711e+06	606061	15533.7	48782.7	172	AP3D1_HUMAN	0.000106624	6.63586e-05	1.87037e-05	5.86737e-05		1.38187	0.618129	2.23557
	KI20A_HUMAN	Kinesin-like protein KIF20A OS=Homo sapiens OX=9606 GN=KIF20A PE=1 SV=1	101242	248.35+-110.43	4.4+-1.5	4	1.95369e+06	1.46911e+06	59876.3	73570.5	248	KI20A_HUMAN	0.000197057	0.000160855	7.20956e-05	8.84873e-05		1.38058	0.619419	2.22883
	MATR3_HUMAN	Matrin-3 OS=Homo sapiens OX=9606 GN=MATR3 PE=1 SV=2	95078	1069.76+-63.63	28.4+-4.59	4	5.48061e+07	4.9328e+07	2.13399e+06	2.02554e+06	106	MATR3_HUMAN	0.00552796	0.005401	0.00256948	0.00243623		1.37172	0.628279	2.1833
	DDX52_HUMAN	Probable ATP-dependent RNA helicase DDX52 OS=Homo sapiens OX=9606 GN=DDX52 PE=1 SV=3	67798	398.14+-102.08	7.6+-1.96	4	5.60962e+06	2.1137e+06	81301.3	226608	398	DDX52_HUMAN	0.000565808	0.000231432	9.78929e-05	0.000272554		1.3655	0.634497	2.1521
	TEDC1_HUMAN	Tubulin epsilon and delta complex protein 1 OS=Homo sapiens OX=9606 GN=TEDC1 PE=1 SV=2	54995.2	147.78+-27.94	3.0+-0.0	3	4.37332e+06	2795719	152298	137570	147	TEDC1_HUMAN	0.000441111	0.000306108	0.000183378	0.000165463		1.36346	0.636537	2.142
	SRRM1_HUMAN	Serine/arginine repetitive matrix protein 1 OS=Homo sapiens OX=9606 GN=SRRM1 PE=1 SV=2	102331	174.19+-46.38	3.7+-1.7	3	1.31289e+06	2.25507e+06	95386.1	52119.7	174	SRRM1_HUMAN	0.000132423	0.000246911	0.000114852	6.26872e-05		1.36237	0.637629	2.13662
	XRN2_HUMAN	5'-3' exoribonuclease 2 OS=Homo sapiens OX=9606 GN=XRN2 PE=1 SV=1	109426	378.55+-134.1	7.2+-2.48	4	4.62105e+06	4.11174e+06	81776.1	276704	378	XRN2_HUMAN	0.000466097	0.000450201	9.84645e-05	0.000332808		1.35993	0.640074	2.12464
	WDR36_HUMAN	WD repeat-containing protein 36 OS=Homo sapiens OX=9606 GN=WDR36 PE=1 SV=1	106282	110.08+-9.13	4.0+-0.63	4	1.93901e+06	1.71018e+06	40171.1	110644	110	WDR36_HUMAN	0.000195576	0.00018725	4.8369e-05	0.000133077		1.35688	0.643116	2.10986
	DKC1_HUMAN	H/ACA ribonucleoprotein complex subunit DKC1 OS=Homo sapiens OX=9606 GN=DKC1 PE=1 SV=3	58094	188.53+-82.6	5.0+-1.67	4	3.88931e+06	3.49208e+06	215263	91896.4	188	DKC1_HUMAN	0.000392291	0.000382354	0.000259192	0.000110529		1.35384	0.646159	2.09521
	NSE1_HUMAN	Non-structural maintenance of chromosomes element 1 homolog OS=Homo sapiens OX=9606 GN=NSMCE1 PE=1 SV=5	31291.8	178.88+-53.84	3.0+-0.82	3	1.35708e+06	887684	40562.3	52384.2	178	NSE1_HUMAN	0.00013688	9.71939e-05	4.88401e-05	6.30054e-05		1.35334	0.646656	2.09283
	RUVB1_HUMAN	RuvB-like 1 OS=Homo sapiens OX=9606 GN=RUVBL1 PE=1 SV=1	50538.4	380.34+-112.68	7.8+-1.33	4	8.81728e+06	4.0791e+06	175389	357843	380	RUVB1_HUMAN	0.000889346	0.000446627	0.000211182	0.000430398		1.35114	0.648863	2.08232
	SPTN2_HUMAN	Spectrin beta chain, non-erythrocytic 2 OS=Homo sapiens OX=9606 GN=SPTBN2 PE=1 SV=3	272526	124.07+-115.69	2.3+-0.43	3	840835	1.31822e+06	60575	31724.1	124	SPTN2_HUMAN	8.48099e-05	0.000144334	7.29368e-05	3.81563e-05		1.34697	0.653034	2.06263
	ACINU_HUMAN	Apoptotic chromatin condensation inducer in the nucleus OS=Homo sapiens OX=9606 GN=ACIN1 PE=1 SV=2	152170	372.44+-126.69	9.2+-4.17	4	3.00142e+06	6.48088e+06	194540	214209	372	ACINU_HUMAN	0.000302735	0.000709601	0.000234241	0.000257641		1.346	0.654004	2.05809
	SEPT9_HUMAN	Septin-9 OS=Homo sapiens OX=9606 GN=SEPTIN9 PE=1 SV=2	65645.9	1338.18+-425.56	32.8+-14.46	4	4.29119e+07	4.77891e+07	2.05377e+06	1.81921e+06	133	SEPT9_HUMAN	0.00432827	0.0052325	0.00247289	0.00218807		1.34453	0.65547	2.05124
	SRP54_HUMAN	Signal recognition particle 54 kDa protein OS=Homo sapiens OX=9606 GN=SRP54 PE=1 SV=1	55953.4	80.08+-0.0	2.0+-0.0	1	0	243055	0	10828.4	80.	SRP54_HUMAN	0	2.66124e-05	0	1.30239e-05		1.34283	0.657169	2.04336
	ACTBL_HUMAN	Beta-actin-like protein 2 OS=Homo sapiens OX=9606 GN=ACTBL2 PE=1 SV=2	42318.1	248.38+-11.27	8.6+-0.49	4	3.14051e+07	3.08198e+07	1.692e+06	970377	248	ACTBL_HUMAN	0.00316765	0.0033745	0.00203729	0.00116713		1.34245	0.657548	2.0416
	DHX9_HUMAN	ATP-dependent RNA helicase A OS=Homo sapiens OX=9606 GN=DHX9 PE=1 SV=4	142181	222.09+-84.49	4.8+-1.17	4	1.63978e+06	1.94368e+06	64216.9	89910.1	222	DHX9_HUMAN	0.000165395	0.000212816	7.73219e-05	0.00010814		1.34195	0.658047	2.03929
	DOCK7_HUMAN	Dedicator of cytokinesis protein 7 OS=Homo sapiens OX=9606 GN=DOCK7 PE=1 SV=4	244289	443.93+-60.67	8.2+-0.98	4	5.17437e+06	4.58172e+06	141951	276001	443	DOCK7_HUMAN	0.000521908	0.00050166	0.000170919	0.000331962		1.34111	0.65889	2.03541
	RRP12_HUMAN	RRP12-like protein OS=Homo sapiens OX=9606 GN=RRP12 PE=1 SV=2	145037	430.61+-67.44	10.8+-2.04	4	6.64609e+06	7.15357e+06	229873	363726	430	RRP12_HUMAN	0.000670351	0.000783255	0.000276784	0.000437473		1.34105	0.65895	2.03513
	SMCA5_HUMAN	SWI/SNF-related matrix-associated actin-dependent regulator of chromatin subfamily A member 5 OS=Homo sapiens OX=9606 GN=SMARCA5 PE=1 SV=1	122513	851.1+-235.4	18.4+-5.75	4	9.09304e+06	1.06756e+07	369194	491032	851	SMCA5_HUMAN	0.000917159	0.00116889	0.000444538	0.000590591		1.33671	0.663294	2.01525
	HNRH3_HUMAN	Heterogeneous nuclear ribonucleoprotein H3 OS=Homo sapiens OX=9606 GN=HNRNPH3 PE=1 SV=2	36960.1	243.78+-161.43	4.6+-1.74	4	4.22245e+06	3.91048e+06	131390	223417	243	HNRH3_HUMAN	0.000425893	0.000428165	0.000158203	0.000268715		1.33345	0.666552	2.00052
	RPN1_HUMAN	Dolichyl-diphosphooligosaccharide--protein glycosyltransferase subunit 1 OS=Homo sapiens OX=9606 GN=RPN1 PE=1 SV=1	68640.9	129.99+-32.49	2.3+-0.47	3	1.10782e+06	762629	58914.2	22242.1	129	RPN1_HUMAN	0.000111739	8.35014e-05	7.09372e-05	2.67518e-05		1.33302	0.66698	1.99859
	M3K21_HUMAN	Mitogen-activated protein kinase kinase kinase 21 OS=Homo sapiens OX=9606 GN=MAP3K21 PE=1 SV=3	115026	95.15+-0.0	2.0+-0.0	1	41792.3	153814	8832.07	0	95.	M3K21_HUMAN	4.21534e-06	1.68413e-05	1.06345e-05	0		1.32887	0.671132	1.98004
	ELAV1_HUMAN	ELAV-like protein 1 OS=Homo sapiens OX=9606 GN=ELAVL1 PE=1 SV=2	36240.2	390.06+-181.76	7.8+-4.26	4	1.04796e+07	7.89826e+06	503072	305136	390	ELAV1_HUMAN	0.00105701	0.000864793	0.000605736	0.000367004		1.32788	0.672119	1.97566
	TCPA_HUMAN	T-complex protein 1 subunit alpha OS=Homo sapiens OX=9606 GN=TCP1 PE=1 SV=1	60818.8	480.53+-170.93	10.8+-4.12	4	9.15216e+06	6.29137e+06	194183	484487	480	TCPA_HUMAN	0.000923123	0.000688852	0.000233811	0.00058272		1.32755	0.672455	1.97418
	SRBD1_HUMAN	S1 RNA-binding domain-containing protein 1 OS=Homo sapiens OX=9606 GN=SRBD1 PE=1 SV=2	112960	647.89+-79.31	15.0+-2.9	4	1.30174e+07	9.83392e+06	412630	600270	647	SRBD1_HUMAN	0.00131298	0.00107673	0.000496838	0.000721978		1.32448	0.675519	1.96068
	RCC1_HUMAN	Regulator of chromosome condensation OS=Homo sapiens OX=9606 GN=RCC1 PE=1 SV=1	45396.7	204.84+-0.0	2.0+-0.0	1	357251	666137	31337	14980.4	204	RCC1_HUMAN	3.60337e-05	7.29364e-05	3.77321e-05	1.80178e-05		1.3231	0.676904	1.95463
	HSP76_HUMAN	Heat shock 70 kDa protein 6 OS=Homo sapiens OX=9606 GN=HSPA6 PE=1 SV=2	71440.4	282.42+-56.52	5.8+-1.17	4	2.28942e+07	1.35833e+07	457224	1.16555e+06	282	HSP76_HUMAN	0.0023092	0.00148726	0.000550532	0.00140187		1.32077	0.679232	1.9445
	EF1A1_HUMAN	Elongation factor 1-alpha 1 OS=Homo sapiens OX=9606 GN=EEF1A1 PE=1 SV=1	50451.2	833.47+-64.04	40.6+-6.12	4	8.98121e+07	2.19009e+07	3.04906e+06	1.85876e+06	833	EF1A1_HUMAN	0.00905881	0.00239796	0.00367129	0.00223563		1.31962	0.680376	1.93955
	SENP6_HUMAN	Sentrin-specific protease 6 OS=Homo sapiens OX=9606 GN=SENP6 PE=1 SV=2	127550	233.68+-94.02	4.4+-0.8	4	2.4338e+06	3.47181e+06	113638	155317	233	SENP6_HUMAN	0.000245482	0.000380134	0.000136829	0.000186808		1.31812	0.681878	1.93308
	HDAC1_HUMAN	Histone deacetylase 1 OS=Homo sapiens OX=9606 GN=HDAC1 PE=1 SV=1	55637.9	174.1+-71.5	4.8+-1.83	4	1.02185e+07	713984	170421	312850	174	HDAC1_HUMAN	0.00103068	7.81752e-05	0.0002052	0.000376282		1.31199	0.688006	1.90695
	HTAI2_HUMAN	Oxidoreductase HTATIP2 OS=Homo sapiens OX=9606 GN=HTATIP2 PE=1 SV=2	27260.1	65.38+-0.0	2.0+-0.0	1	285770	356048	0	30107.9	65.	HTAI2_HUMAN	2.88239e-05	3.89842e-05	0	3.62124e-05		1.30374	0.696255	1.87251
	ACTB_HUMAN	Actin, cytoplasmic 1 OS=Homo sapiens OX=9606 GN=ACTB PE=1 SV=1	42051.9	1072.56+-22.88	44.4+-21.33	4	2.77865e+07	3.90117e+07	1.24344e+06	1.90026e+06	107	ACTB_HUMAN	0.00280266	0.00427145	0.00149719	0.00228555		1.30316	0.69684	1.8701
	PHRF1_HUMAN	PHD and RING finger domain-containing protein 1 OS=Homo sapiens OX=9606 GN=PHRF1 PE=1 SV=3	180268	142.54+-60.32	2.8+-0.4	4	1.15733e+06	2.38809e+06	83439.8	88140.3	142	PHRF1_HUMAN	0.000116733	0.000261475	0.000100468	0.000106011		1.29371	0.706289	1.8317
	DDX55_HUMAN	ATP-dependent RNA helicase DDX55 OS=Homo sapiens OX=9606 GN=DDX55 PE=1 SV=3	69073.4	96.24+-38.75	2.0+-0.0	2	508463	523167	0	49374.1	96.	DDX55_HUMAN	5.12856e-05	5.72824e-05	0	5.93849e-05		1.29284	0.707161	1.82821
	EF1G_HUMAN	Elongation factor 1-gamma OS=Homo sapiens OX=9606 GN=EEF1G PE=1 SV=3	50429.3	121.52+-15.95	2.8+-0.98	4	2.69298e+06	2.0068e+06	117985	106392	121	EF1G_HUMAN	0.000271624	0.000219728	0.000142063	0.000127964		1.29069	0.70931	1.81964
	PRPS1_HUMAN	Ribose-phosphate pyrophosphokinase 1 OS=Homo sapiens OX=9606 GN=PRPS1 PE=1 SV=2	35325.1	108.31+-25.67	2.6+-0.49	4	1917895	509808	63075.3	50866.5	108	PRPS1_HUMAN	0.000193446	5.58196e-05	7.59474e-05	6.11799e-05		1.29022	0.709781	1.81777
	PTPS_HUMAN	6-pyruvoyl tetrahydrobiopterin synthase OS=Homo sapiens OX=9606 GN=PTS PE=1 SV=1	16489.2	56.75+-0.72	2.0+-0.0	2	1122225	1610661	64533.8	68014.5	56.	PTPS_HUMAN	0.000113192	0.000176354	7.77035e-05	8.18048e-05		1.28958	0.710419	1.81524
	RBM28_HUMAN	RNA-binding protein 28 OS=Homo sapiens OX=9606 GN=RBM28 PE=1 SV=3	86197.9	102.7+-33.88	3.2+-1.17	4	1977469	2.34441e+06	158186	50920.7	102	RBM28_HUMAN	0.000199455	0.000256693	0.000190468	6.12452e-05		1.28881	0.711193	1.81218
	LMO7_HUMAN	LIM domain only protein 7 OS=Homo sapiens OX=9606 GN=LMO7 PE=1 SV=3	194002	275.42+-48.37	5.4+-1.02	4	3.1337e+06	4.20863e+06	153353	206853	275	LMO7_HUMAN	0.000316077	0.000460809	0.000184648	0.000248793		1.28376	0.716238	1.79237
	AQR_HUMAN	RNA helicase aquarius OS=Homo sapiens OX=9606 GN=AQR PE=1 SV=4	172270	117.44+-63.28	2.6+-0.8	4	1.10141e+06	965272	51331.5	49711.4	117	AQR_HUMAN	0.000111093	0.000105689	6.18069e-05	5.97906e-05		1.28129	0.718706	1.78278
	PCBP1_HUMAN	Poly(rC)-binding protein 1 OS=Homo sapiens OX=9606 GN=PCBP1 PE=1 SV=2	37987.1	624.06+-98.18	16.4+-4.63	4	1.77314e+07	1.69845e+07	916927	794253	624	PCBP1_HUMAN	0.00178846	0.00185966	0.00110405	0.000955292		1.27837	0.721632	1.7715
	GCN1_HUMAN	eIF-2-alpha kinase activator GCN1 OS=Homo sapiens OX=9606 GN=GCN1 PE=1 SV=6	294967	1318.11+-131.36	29.2+-1.83	4	1.77854e+07	9.27053e+06	618445	709672	131	GCN1_HUMAN	0.00179391	0.00101504	0.000744654	0.000853562		1.27472	0.72528	1.75756
	DDX3X_HUMAN	ATP-dependent RNA helicase DDX3X OS=Homo sapiens OX=9606 GN=DDX3X PE=1 SV=3	73597.1	1605.34+-240.47	58.8+-24.28	4	6.30952e+07	4.53442e+07	2.00346e+06	3.36895e+06	160	DDX3X_HUMAN	0.00636404	0.00496481	0.00241232	0.00405202		1.27339	0.726609	1.75251
	SF3B6_HUMAN	Splicing factor 3B subunit 6 OS=Homo sapiens OX=9606 GN=SF3B6 PE=1 SV=1	14689.6	89.66+-24.0	2.0+-0.0	2	881924	530552	54212.4	15811.3	89.	SF3B6_HUMAN	8.89543e-05	5.80909e-05	6.52758e-05	1.90172e-05		1.27126	0.728742	1.74445
	SMRC1_HUMAN	SWI/SNF complex subunit SMARCC1 OS=Homo sapiens OX=9606 GN=SMARCC1 PE=1 SV=3	123303	384.55+-173.53	12.0+-6.29	4	1.36733e+07	1.95427e+07	1.00917e+06	668579	384	SMRC1_HUMAN	0.00137914	0.00213976	0.00121511	0.000804137		1.27079	0.729215	1.74268
	COIL_HUMAN	Coilin OS=Homo sapiens OX=9606 GN=COIL PE=1 SV=1	63254.2	98.61+-0.0	2.0+-0.0	1	573890	118764	34084.1	0	98.	COIL_HUMAN	5.78848e-05	1.30037e-05	4.10398e-05	0		1.26668	0.733323	1.72731
	KIF22_HUMAN	Kinesin-like protein KIF22 OS=Homo sapiens OX=9606 GN=KIF22 PE=1 SV=5	73615.8	584.6+-119.91	9.2+-2.32	4	6.52088e+06	6.0649e+06	367750	268472	584	KIF22_HUMAN	0.000657722	0.000664055	0.000442799	0.000322906		1.26638	0.733616	1.72622
	PYR1_HUMAN	CAD protein OS=Homo sapiens OX=9606 GN=CAD PE=1 SV=3	245167	610.06+-131.1	12.2+-1.83	4	8.73778e+06	7.7448e+06	515933	327762	610	PYR1_HUMAN	0.000881326	0.000847991	0.000621222	0.000394218		1.26009	0.739912	1.70302
	MCM5_HUMAN	DNA replication licensing factor MCM5 OS=Homo sapiens OX=9606 GN=MCM5 PE=1 SV=5	83031.5	286.7+-54.1	5.8+-1.83	4	3.39641e+06	3.06561e+06	167852	164010	286	MCM5_HUMAN	0.000342576	0.000335658	0.000202106	0.000197264		1.25878	0.741218	1.69826
	INF2_HUMAN	Inverted formin-2 OS=Homo sapiens OX=9606 GN=INF2 PE=1 SV=2	136851	279.75+-67.39	5.2+-0.98	4	2.94357e+06	1561731	94145.5	135015	279	INF2_HUMAN	0.0002969	0.000170996	0.000113358	0.00016239		1.25839	0.741613	1.69683
	MZT2A_HUMAN	Mitotic-spindle organizing protein 2A OS=Homo sapiens OX=9606 GN=MZT2A PE=1 SV=2	16267.5	93.75+-8.47	2.0+-0.0	3	384691	449023	30759.8	12408.2	93.	MZT2A_HUMAN	3.88015e-05	4.91642e-05	3.70371e-05	1.49241e-05		1.25731	0.742691	1.69291
	DDX1_HUMAN	ATP-dependent RNA helicase DDX1 OS=Homo sapiens OX=9606 GN=DDX1 PE=1 SV=2	83349.1	1518.68+-86.32	41.6+-3.38	4	5.26018e+07	7.82686e+07	3.03223e+06	3.85948e+06	151	DDX1_HUMAN	0.00530563	0.00856975	0.00365103	0.00464201		1.25181	0.748185	1.67314
	DDB1_HUMAN	DNA damage-binding protein 1 OS=Homo sapiens OX=9606 GN=DDB1 PE=1 SV=1	128142	299.02+-45.43	6.6+-1.5	4	3.67421e+06	2.26505e+06	98643.1	210160	299	DDB1_HUMAN	0.000370596	0.000248004	0.000118774	0.000252771		1.24951	0.750486	1.66494
	NKRF_HUMAN	NF-kappa-B-repressing factor OS=Homo sapiens OX=9606 GN=NKRF PE=1 SV=2	78308.5	101.98+-0.0	2.0+-0.0	1	257724	375490	0	33844.3	101	NKRF_HUMAN	2.59951e-05	4.11129e-05	0	4.07064e-05		1.24488	0.75512	1.64859
	ZN692_HUMAN	Zinc finger protein 692 OS=Homo sapiens OX=9606 GN=ZNF692 PE=1 SV=1	58129.5	190.75+-131.82	3.5+-1.5	2	338571	1.9931e+06	74770.1	53421.8	190	ZN692_HUMAN	3.41496e-05	0.000218228	9.00287e-05	6.42533e-05		1.24122	0.758778	1.63582
	P52K_HUMAN	52 kDa repressor of the inhibitor of the protein kinase OS=Homo sapiens OX=9606 GN=THAP12 PE=1 SV=2	88788.7	374.91+-71.51	8.8+-1.33	4	3.10724e+06	2.22583e+06	126065	157202	374	P52K_HUMAN	0.000313408	0.00024371	0.000151791	0.000189076		1.24082	0.759182	1.63441
	MYL6B_HUMAN	Myosin light chain 6B OS=Homo sapiens OX=9606 GN=MYL6B PE=1 SV=1	22863.7	167.91+-66.8	3.0+-1.0	2	0	2.91013e+06	162688	0	167	MYL6B_HUMAN	0	0.000318635	0.000195888	0		1.23856	0.761437	1.62661
	CHTOP_HUMAN	Chromatin target of PRMT1 protein OS=Homo sapiens OX=9606 GN=CHTOP PE=1 SV=2	26380.3	142.99+-55.98	2.0+-0.0	3	404666	574586	27831.8	25252	142	CHTOP_HUMAN	4.08162e-05	6.29124e-05	3.35116e-05	3.0372e-05		1.23772	0.762278	1.62371
	WDHD1_HUMAN	WD repeat and HMG-box DNA-binding protein 1 OS=Homo sapiens OX=9606 GN=WDHD1 PE=1 SV=1	127371	161.12+-0.0	2.0+-0.0	1	196418	618032	22330.4	23174.9	161	WDHD1_HUMAN	1.98115e-05	6.76693e-05	2.68875e-05	2.78737e-05		1.23003	0.769972	1.5975
	KI13B_HUMAN	Kinesin-like protein KIF13B OS=Homo sapiens OX=9606 GN=KIF13B PE=1 SV=2	203974	852.11+-237.26	15.0+-3.22	4	6.62502e+06	6.80608e+06	346736	397142	852	KI13B_HUMAN	0.000668225	0.000745208	0.000417497	0.000477665		1.2245	0.775503	1.57897
	LARP4_HUMAN	La-related protein 4 OS=Homo sapiens OX=9606 GN=LARP4 PE=1 SV=3	81230.1	119.0+-35.16	2.3+-0.43	3	127479	440856	10904.7	21361.9	119	LARP4_HUMAN	1.28581e-05	4.827e-05	1.31301e-05	2.56932e-05		1.22316	0.776844	1.57452
	STK24_HUMAN	Serine/threonine-protein kinase 24 OS=Homo sapiens OX=9606 GN=STK24 PE=1 SV=1	49562.4	108.89+-0.0	3.0+-0.0	1	435287	0	0	23268.3	108	STK24_HUMAN	4.39047e-05	0	0	2.79861e-05		1.22143	0.778573	1.5688
	PSPC1_HUMAN	Paraspeckle component 1 OS=Homo sapiens OX=9606 GN=PSPC1 PE=1 SV=1	58820.2	734.01+-435.74	16.0+-9.19	4	1.47446e+07	1.14302e+07	733013	721565	734	PSPC1_HUMAN	0.0014872	0.00125151	0.000882602	0.000867866		1.22014	0.779862	1.56456
	ARHG2_HUMAN	Rho guanine nucleotide exchange factor 2 OS=Homo sapiens OX=9606 GN=ARHGEF2 PE=1 SV=4	112386	488.64+-109.18	10.2+-1.6	4	6.07677e+06	6.17275e+06	267341	419818	488	ARHG2_HUMAN	0.000612927	0.000675864	0.000321899	0.000504938		1.21835	0.781647	1.5587
	COR1C_HUMAN	Coronin-1C OS=Homo sapiens OX=9606 GN=CORO1C PE=1 SV=1	53899.3	352.87+-62.12	12.2+-4.35	4	1.44737e+07	1.05027e+07	550960	841931	352	COR1C_HUMAN	0.00145987	0.00114995	0.000663397	0.00101264		1.21788	0.782123	1.55714
	SYDE1_HUMAN	Rho GTPase-activating protein SYDE1 OS=Homo sapiens OX=9606 GN=SYDE1 PE=1 SV=1	80427.8	123.86+-51.84	2.2+-0.4	4	560570	715619	32486.3	39949.9	123	SYDE1_HUMAN	5.65413e-05	7.83542e-05	3.91159e-05	4.80499e-05		1.21494	0.785061	1.54757
	COPE_HUMAN	Coatomer subunit epsilon OS=Homo sapiens OX=9606 GN=COPE PE=1 SV=3	34688.4	88.33+-23.05	3.2+-0.4	4	2.46336e+06	1.75927e+06	124231	116023	88.	COPE_HUMAN	0.000248464	0.000192625	0.000149583	0.000139547		1.2081	0.7919	1.52557
	RL31_HUMAN	60S ribosomal protein L31 OS=Homo sapiens OX=9606 GN=RPL31 PE=1 SV=1	14453.9	93.81+-0.0	2.0+-0.0	1	395191	309812	25168.1	15180.5	93.	RL31_HUMAN	3.98605e-05	3.39218e-05	3.03042e-05	1.82585e-05		1.20613	0.793865	1.51932
	HS71L_HUMAN	Heat shock 70 kDa protein 1-like OS=Homo sapiens OX=9606 GN=HSPA1L PE=1 SV=2	70730.5	441.17+-21.03	11.6+-1.5	4	2.45759e+07	2.69475e+07	1.37969e+06	1.59785e+06	441	HS71L_HUMAN	0.00247883	0.00295053	0.00166125	0.00192183		1.20486	0.795141	1.51528
	ZGPAT_HUMAN	Zinc finger CCCH-type with G patch domain-containing protein OS=Homo sapiens OX=9606 GN=ZGPAT PE=1 SV=3	57779.8	502.75+-48.76	9.8+-0.4	4	7.78274e+06	4.55794e+06	320910	391189	502	ZGPAT_HUMAN	0.000784998	0.000499056	0.0003864	0.000470505		1.19951	0.800487	1.49848
	QSER1_HUMAN	Glutamine and serine-rich protein 1 OS=Homo sapiens OX=9606 GN=QSER1 PE=1 SV=3	190597	213.87+-99.44	3.0+-0.89	4	1.16765e+06	682613	43451.3	63330.4	213	QSER1_HUMAN	0.000117774	7.47403e-05	5.23187e-05	7.6171e-05		1.19945	0.800549	1.49829
	ZN579_HUMAN	Zinc finger protein 579 OS=Homo sapiens OX=9606 GN=ZNF579 PE=1 SV=2	61725.8	124.07+-43.12	2.5+-0.5	3	571642	707167	0	77149.6	124	ZN579_HUMAN	5.76581e-05	7.74288e-05	0	9.27921e-05		1.1856	0.814398	1.4558
	RFC1_HUMAN	Replication factor C subunit 1 OS=Homo sapiens OX=9606 GN=RFC1 PE=1 SV=4	128688	1021.43+-248.36	19.6+-4.08	4	1.01234e+07	9734656	505073	698697	102	RFC1_HUMAN	0.00102108	0.00106586	0.000608145	0.000840361		1.18058	0.819418	1.44076
	C1TC_HUMAN	C-1-tetrahydrofolate synthase, cytoplasmic OS=Homo sapiens OX=9606 GN=MTHFD1 PE=1 SV=3	102180	485.04+-42.5	10.2+-0.98	4	5.64001e+06	5.65609e+06	361252	324449	485	C1TC_HUMAN	0.000568873	0.000619294	0.000434975	0.000390233		1.18027	0.819726	1.43984
	USP9X_HUMAN	Probable ubiquitin carboxyl-terminal hydrolase FAF-X OS=Homo sapiens OX=9606 GN=USP9X PE=1 SV=3	295515	487.42+-55.11	10.4+-1.62	4	2.88203e+06	3.16422e+06	187419	180895	487	USP9X_HUMAN	0.000290693	0.000346456	0.000225666	0.000217573		1.17948	0.820519	1.43748
	KIF14_HUMAN	Kinesin-like protein KIF14 OS=Homo sapiens OX=9606 GN=KIF14 PE=1 SV=1	187743	311.71+-79.25	6.8+-2.4	4	3.22929e+06	2.06748e+06	149988	169408	311	KIF14_HUMAN	0.000325719	0.000226371	0.000180597	0.000203756		1.17912	0.820878	1.43642
	CTND1_HUMAN	Catenin delta-1 OS=Homo sapiens OX=9606 GN=CTNND1 PE=1 SV=1	108674	1046.76+-108.63	25.0+-3.52	4	2.11056e+07	2.0104e+07	1.33273e+06	1.17994e+06	104	CTND1_HUMAN	0.00212879	0.00220122	0.00160471	0.00141918		1.17761	0.82239	1.43194
	CKAP5_HUMAN	Cytoskeleton-associated protein 5 OS=Homo sapiens OX=9606 GN=CKAP5 PE=1 SV=3	227062	1812.07+-226.38	38.2+-5.15	4	2.97505e+07	2.29053e+07	1.75623e+06	1.4617e+06	181	CKAP5_HUMAN	0.00300075	0.00250793	0.00211463	0.00175807		1.17439	0.825613	1.42244
	RTF1_HUMAN	RNA polymerase-associated protein RTF1 homolog OS=Homo sapiens OX=9606 GN=RTF1 PE=1 SV=4	80492.7	116.5+-0.0	3.0+-0.0	1	193254	239979	21523.7	5257.64	116	RTF1_HUMAN	1.94924e-05	2.62757e-05	2.59162e-05	6.32365e-06		1.17342	0.826579	1.41961
	PAK4_HUMAN	Serine/threonine-protein kinase PAK 4 OS=Homo sapiens OX=9606 GN=PAK4 PE=1 SV=1	64317.3	445.33+-94.51	11.0+-2.76	4	8.61332e+06	1.04311e+07	613907	565504	445	PAK4_HUMAN	0.000868773	0.00114212	0.00073919	0.000680162		1.17245	0.827551	1.41677
	TBB2A_HUMAN	Tubulin beta-2A chain OS=Homo sapiens OX=9606 GN=TUBB2A PE=1 SV=1	50274.1	1206.29+-82.82	46.8+-2.56	4	3.52216e+07	3.50043e+07	2.17495e+06	2.15969e+06	120	TBB2A_HUMAN	0.00355259	0.00383267	0.0026188	0.00259758		1.17211	0.827889	1.41578
	MAP4_HUMAN	Microtubule-associated protein 4 OS=Homo sapiens OX=9606 GN=MAP4 PE=1 SV=3	121443	729.96+-139.86	15.6+-4.36	4	1.21516e+07	1.37747e+07	664186	949320	729	MAP4_HUMAN	0.00122566	0.00150822	0.00079973	0.0011418		1.16947	0.83053	1.4081
	DDX46_HUMAN	Probable ATP-dependent RNA helicase DDX46 OS=Homo sapiens OX=9606 GN=DDX46 PE=1 SV=2	117803	536.58+-122.34	11.0+-1.67	4	6.95716e+06	5722015	498630	285156	536	DDX46_HUMAN	0.000701727	0.000626512	0.000600388	0.000342973		1.16943	0.83057	1.40799
	XRCC6_HUMAN	X-ray repair cross-complementing protein 6 OS=Homo sapiens OX=9606 GN=XRCC6 PE=1 SV=2	70084.2	471.27+-122.78	11.0+-3.58	4	6.50107e+06	6.16434e+06	243116	544271	471	XRCC6_HUMAN	0.000655723	0.000674944	0.000292729	0.000654624		1.16827	0.831734	1.40461
	CR021_HUMAN	UPF0711 protein C18orf21 OS=Homo sapiens OX=9606 GN=C18orf21 PE=1 SV=1	25153.2	72.39+-0.0	3.0+-0.0	1	423026	483152	0	56655.2	72.	CR021_HUMAN	4.2668e-05	5.29011e-05	0	6.81423e-05		1.16753	0.832469	1.40249
	RGAP1_HUMAN	Rac GTPase-activating protein 1 OS=Homo sapiens OX=9606 GN=RACGAP1 PE=1 SV=1	71666	494.13+-124.27	10.2+-3.49	4	9.45659e+06	6.95717e+06	715005	305415	494	RGAP1_HUMAN	0.000953829	0.000761751	0.00086092	0.00036734		1.16554	0.834461	1.39676
	ENL_HUMAN	Protein ENL OS=Homo sapiens OX=9606 GN=MLLT1 PE=1 SV=2	62417.1	122.18+-70.89	2.3+-0.47	3	947951	905004	62134.9	53992.4	122	ENL_HUMAN	9.56141e-05	9.90903e-05	7.48151e-05	6.49396e-05		1.16429	0.835706	1.39319
	RTCB_HUMAN	tRNA-splicing ligase RtcB homolog OS=Homo sapiens OX=9606 GN=RTCB PE=1 SV=1	55688.1	1327.74+-285.39	37.2+-9.89	4	5.15785e+07	3.58373e+07	2.86387e+06	2.61914e+06	132	RTCB_HUMAN	0.00520241	0.00392388	0.00344832	0.00315018		1.16075	0.839247	1.38309
	DDX5_HUMAN	Probable ATP-dependent RNA helicase DDX5 OS=Homo sapiens OX=9606 GN=DDX5 PE=1 SV=1	69617.9	1061.24+-221.43	33.4+-8.24	4	3.62305e+07	3.13536e+07	1.75219e+06	2.5339e+06	106	DDX5_HUMAN	0.00365435	0.00343295	0.00210977	0.00304767		1.15761	0.842392	1.37419
	MYL6_HUMAN	Myosin light polypeptide 6 OS=Homo sapiens OX=9606 GN=MYL6 PE=1 SV=2	17090.2	363.06+-19.14	10.4+-1.74	4	10380608	6.78834e+06	440610	644647	363	MYL6_HUMAN	0.00104703	0.000743266	0.000530527	0.000775353		1.15646	0.843544	1.37095
	TEDC2_HUMAN	Tubulin epsilon and delta complex protein 2 OS=Homo sapiens OX=9606 GN=TEDC2 PE=1 SV=1	47000.4	174.28+-6.41	2.0+-0.0	2	1263995	277661	50157.1	45638.9	174	TEDC2_HUMAN	0.000127492	3.04015e-05	6.03929e-05	5.48924e-05		1.15597	0.84403	1.36958
	HNRH1_HUMAN	Heterogeneous nuclear ribonucleoprotein H OS=Homo sapiens OX=9606 GN=HNRNPH1 PE=1 SV=4	49483.5	842.34+-103.62	24.0+-5.44	4	1.36526e+07	1.48861e+07	798263	1.02971e+06	842	HNRH1_HUMAN	0.00137705	0.0016299	0.000961168	0.00123849		1.15505	0.844948	1.36701
	TF2H4_HUMAN	General transcription factor IIH subunit 4 OS=Homo sapiens OX=9606 GN=GTF2H4 PE=1 SV=1	52324.4	86.88+-0.0	2.0+-0.0	1	278580	45335.1	20120.7	0	86.	TF2H4_HUMAN	2.80986e-05	4.96381e-06	2.42268e-05	0		1.15423	0.845771	1.36471
	EF2_HUMAN	Elongation factor 2 OS=Homo sapiens OX=9606 GN=EEF2 PE=1 SV=4	96246.3	320.22+-103.51	6.6+-1.85	4	4.45485e+06	2.98824e+06	222867	250364	320	EF2_HUMAN	0.000449334	0.000327187	0.000268348	0.000301126		1.15382	0.846176	1.36357
	TBB6_HUMAN	Tubulin beta-6 chain OS=Homo sapiens OX=9606 GN=TUBB6 PE=1 SV=1	50281.2	719.27+-100.62	24.4+-2.8	4	1.24189e+08	8.88814e+07	7.82808e+06	5.79808e+06	719	TBB6_HUMAN	0.0125262	0.00973176	0.0094256	0.00697367		1.15155	0.848446	1.35725
	ZN276_HUMAN	Zinc finger protein 276 OS=Homo sapiens OX=9606 GN=ZNF276 PE=1 SV=4	68715.7	168.47+-27.72	3.8+-0.83	3	882230	982165	52939.3	67507.2	168	ZN276_HUMAN	8.89852e-05	0.000107539	6.37429e-05	8.11946e-05		1.15108	0.848925	1.35592
	COPB_HUMAN	Coatomer subunit beta OS=Homo sapiens OX=9606 GN=COPB1 PE=1 SV=3	108214	99.38+-40.75	2.3+-0.43	3	1553166	618852	79803.7	58088.9	99.	COPB_HUMAN	0.000156658	6.77591e-05	9.60896e-05	6.98667e-05		1.14976	0.850243	1.35227
	NSRP1_HUMAN	Nuclear speckle splicing regulatory protein 1 OS=Homo sapiens OX=9606 GN=NSRP1 PE=1 SV=1	66578.1	332.93+-114.55	8.0+-2.19	4	7.73769e+06	7.53317e+06	500720	490963	332	NSRP1_HUMAN	0.000780454	0.000824818	0.000602905	0.000590508		1.14716	0.852838	1.34511
	ZNF24_HUMAN	Zinc finger protein 24 OS=Homo sapiens OX=9606 GN=ZNF24 PE=1 SV=4	42756.3	351.1+-109.0	7.2+-2.04	4	1.05248e+07	4.58298e+06	573866	393258	351	ZNF24_HUMAN	0.00106157	0.000501797	0.000690977	0.000472994		1.14644	0.853558	1.34313
	PTH_HUMAN	Probable peptidyl-tRNA hydrolase OS=Homo sapiens OX=9606 GN=PTRH1 PE=1 SV=1	23207.2	146.76+-20.5	2.8+-0.4	4	1.05221e+06	2.02904e+06	92456.9	113278	146	PTH_HUMAN	0.00010613	0.000222163	0.000111325	0.000136246		1.14018	0.859824	1.32606
	IF4G1_HUMAN	Eukaryotic translation initiation factor 4 gamma 1 OS=Homo sapiens OX=9606 GN=EIF4G1 PE=1 SV=4	176124	213.04+-55.75	4.4+-0.8	4	1.40291e+06	666724	72132.4	63316.1	213	IF4G1_HUMAN	0.000141503	7.30007e-05	8.68528e-05	7.61538e-05		1.13641	0.863588	1.31592
	MYH9_HUMAN	Myosin-9 OS=Homo sapiens OX=9606 GN=MYH9 PE=1 SV=4	227646	3302.3+-160.38	70.4+-5.39	4	5.63228e+07	5.65683e+07	4.11912e+06	3.39184e+06	330	MYH9_HUMAN	0.00568094	0.00619376	0.00495973	0.00407955		1.13558	0.864425	1.31368
	EPN4_HUMAN	Clathrin interactor 1 OS=Homo sapiens OX=9606 GN=CLINT1 PE=1 SV=1	68272.8	103.99+-29.25	2.5+-0.5	3	0	551336	14874.9	23350.1	103	EPN4_HUMAN	0	6.03666e-05	1.79105e-05	2.80844e-05		1.13512	0.864879	1.31246
	MK03_HUMAN	Mitogen-activated protein kinase 3 OS=Homo sapiens OX=9606 GN=MAPK3 PE=1 SV=4	43450.2	119.67+-35.86	3.0+-1.1	4	2.05336e+06	2.57553e+06	183330	127310	119	MK03_HUMAN	0.00020711	0.000281999	0.000220743	0.000153123		1.13354	0.866458	1.30825
	PRDX2_HUMAN	Peroxiredoxin-2 OS=Homo sapiens OX=9606 GN=PRDX2 PE=1 SV=5	22049.3	92.0+-14.44	2.3+-0.47	3	548429	6.58482e+06	493357	0	92.	PRDX2_HUMAN	5.53167e-05	0.000720982	0.000594039	0		1.133	0.866997	1.30681
	HNRPL_HUMAN	Heterogeneous nuclear ribonucleoprotein L OS=Homo sapiens OX=9606 GN=HNRNPL PE=1 SV=2	64719.6	868.29+-99.45	46.2+-16.62	4	1.11877e+08	7.0984e+07	5.72057e+06	6.42515e+06	868	HNRPL_HUMAN	0.0112843	0.00777214	0.006888	0.00772788		1.13188	0.868124	1.30382
	LSM12_HUMAN	Protein LSM12 homolog OS=Homo sapiens OX=9606 GN=LSM12 PE=1 SV=2	21972.2	118.8+-32.66	2.2+-0.4	4	2250765	1.68773e+06	153184	110038	118	LSM12_HUMAN	0.000227021	0.000184792	0.000184445	0.000132349		1.13041	0.869589	1.29994
	NSE4A_HUMAN	Non-structural maintenance of chromosomes element 4 homolog A OS=Homo sapiens OX=9606 GN=NSMCE4A PE=1 SV=2	44388.2	191.75+-55.04	3.8+-1.47	4	2.19261e+06	1.20358e+06	98990.9	126638	191	NSE4A_HUMAN	0.000221156	0.000131782	0.000119192	0.000152315		1.13041	0.869594	1.29992
	CAMP3_HUMAN	Calmodulin-regulated spectrin-associated protein 3 OS=Homo sapiens OX=9606 GN=CAMSAP3 PE=1 SV=2	135464	510.67+-40.68	10.2+-0.75	4	6.00397e+06	5.9899e+06	401275	411807	510	CAMP3_HUMAN	0.000605584	0.000655844	0.000483166	0.000495303		1.12633	0.873673	1.28919
	ZBT14_HUMAN	Zinc finger and BTB domain-containing protein 14 OS=Homo sapiens OX=9606 GN=ZBTB14 PE=1 SV=2	51893.1	111.97+-29.66	2.2+-0.4	4	1473157	1.41716e+06	143666	54099.6	111	ZBT14_HUMAN	0.000148588	0.000155168	0.000172985	6.50686e-05		1.12126	0.878735	1.276
	XRCC5_HUMAN	X-ray repair cross-complementing protein 5 OS=Homo sapiens OX=9606 GN=XRCC5 PE=1 SV=3	83222.5	239.98+-21.34	4.4+-0.49	4	1.2498e+06	1.37001e+06	80052.2	101845	239	XRCC5_HUMAN	0.00012606	0.000150004	9.63889e-05	0.000122494		1.11553	0.884469	1.26124
	MAP7_HUMAN	Ensconsin OS=Homo sapiens OX=9606 GN=MAP7 PE=1 SV=1	84115.6	208.69+-58.16	3.4+-0.8	4	1.26141e+06	998784	40875.9	115718	208	MAP7_HUMAN	0.000127231	0.000109358	4.92177e-05	0.00013918		1.1134	0.886604	1.2558
	LC7L2_HUMAN	Putative RNA-binding protein Luc7-like 2 OS=Homo sapiens OX=9606 GN=LUC7L2 PE=1 SV=2	46941.8	770.64+-166.39	35.2+-2.64	4	2.90758e+07	3.26065e+07	2.0205e+06	2.32708e+06	770	LC7L2_HUMAN	0.0029327	0.00357014	0.00243284	0.00279891		1.10832	0.89168	1.24296
	COR1B_HUMAN	Coronin-1B OS=Homo sapiens OX=9606 GN=CORO1B PE=1 SV=1	54884.5	154.36+-68.31	3.2+-0.98	4	3.76703e+06	3.35205e+06	366778	134480	154	COR1B_HUMAN	0.000379957	0.000367021	0.000441628	0.000161746		1.10635	0.893654	1.238
	GTF2I_HUMAN	General transcription factor II-I OS=Homo sapiens OX=9606 GN=GTF2I PE=1 SV=2	112859	760.31+-180.03	20.6+-6.22	4	1.15749e+07	1.55535e+07	982001	962824	760	GTF2I_HUMAN	0.00116749	0.00170297	0.0011824	0.00115804		1.10171	0.898287	1.22646
	FBRL_HUMAN	rRNA 2'-O-methyltransferase fibrillarin OS=Homo sapiens OX=9606 GN=FBL PE=1 SV=2	33877.5	397.11+-16.22	9.2+-0.75	4	5.22076e+06	7.97891e+06	499112	455664	397	FBRL_HUMAN	0.000526587	0.000873623	0.000600969	0.000548052		1.09854	0.901465	1.21861
	HNRPM_HUMAN	Heterogeneous nuclear ribonucleoprotein M OS=Homo sapiens OX=9606 GN=HNRNPM PE=1 SV=3	77749.4	878.3+-106.35	19.4+-1.96	4	1.02504e+07	1.22212e+07	997548	630826	878	HNRPM_HUMAN	0.00103389	0.00133812	0.00120112	0.00075873		1.09515	0.904855	1.2103
	BAG2_HUMAN	BAG family molecular chaperone regulator 2 OS=Homo sapiens OX=9606 GN=BAG2 PE=1 SV=1	23928.3	131.89+-35.71	2.6+-0.8	4	502462	836852	35425.7	63151.1	131	BAG2_HUMAN	5.06803e-05	9.16283e-05	4.26551e-05	7.59553e-05		1.09083	0.909174	1.1998
	KINH_HUMAN	Kinesin-1 heavy chain OS=Homo sapiens OX=9606 GN=KIF5B PE=1 SV=1	110358	988.34+-175.24	19.2+-1.47	4	1.43413e+07	1.08157e+07	1.06086e+06	776459	988	KINH_HUMAN	0.00144652	0.00118422	0.00127735	0.00093389		1.08664	0.913361	1.18971
	ZN316_HUMAN	Zinc finger protein 316 OS=Homo sapiens OX=9606 GN=ZNF316 PE=1 SV=1	110422	88.96+-0.2	2.0+-0.0	2	318446	299035	28980.7	16367.9	88.	ZN316_HUMAN	3.21197e-05	3.27418e-05	3.48949e-05	1.96865e-05		1.08607	0.913933	1.18834
	KIF23_HUMAN	Kinesin-like protein KIF23 OS=Homo sapiens OX=9606 GN=KIF23 PE=1 SV=3	111016	507.26+-45.78	10.2+-0.98	4	6.4037e+06	4.18722e+06	443627	330398	507	KIF23_HUMAN	0.000645902	0.000458465	0.00053416	0.000397388		1.08489	0.915115	1.18552
	1433Z_HUMAN	14-3-3 protein zeta/delta OS=Homo sapiens OX=9606 GN=YWHAZ PE=1 SV=1	27898.8	181.67+-74.78	3.0+-1.26	4	3.07036e+06	2.43195e+06	6284.52	397809	181	1433Z_HUMAN	0.000309689	0.000266278	7.56703e-06	0.000478467		1.08468	0.915318	1.18503
	HNRPU_HUMAN	Heterogeneous nuclear ribonucleoprotein U OS=Homo sapiens OX=9606 GN=HNRNPU PE=1 SV=6	91269.3	1284.77+-195.64	36.0+-12.25	4	5.52043e+07	5.5233e+07	4.36064e+06	3.79403e+06	128	HNRPU_HUMAN	0.00556812	0.00604754	0.00525054	0.00456328		1.08408	0.915918	1.1836
	UHRF1_HUMAN	E3 ubiquitin-protein ligase UHRF1 OS=Homo sapiens OX=9606 GN=UHRF1 PE=1 SV=1	91296.6	292.64+-156.84	7.2+-3.66	4	4.51634e+06	3491587	215954	376165	292	UHRF1_HUMAN	0.000455536	0.000382299	0.000260025	0.000452435		1.08087	0.919128	1.17598
	AR6P4_HUMAN	ADP-ribosylation factor-like protein 6-interacting protein 4 OS=Homo sapiens OX=9606 GN=ARL6IP4 PE=1 SV=2	45287.3	277.44+-47.46	6.2+-0.75	4	8.74699e+06	6957517	601200	568514	277	AR6P4_HUMAN	0.000882256	0.000761789	0.000723889	0.000683784		1.07746	0.922545	1.16792
	RUVB2_HUMAN	RuvB-like 2 OS=Homo sapiens OX=9606 GN=RUVBL2 PE=1 SV=3	51295.6	618.01+-59.59	11.2+-1.47	4	8.39686e+06	7.80047e+06	633509	587947	618	RUVB2_HUMAN	0.000846941	0.000854085	0.000762793	0.000707156		1.07287	0.927127	1.1572
	DDX21_HUMAN	Nucleolar RNA helicase 2 OS=Homo sapiens OX=9606 GN=DDX21 PE=1 SV=5	87803.6	484.17+-117.34	11.8+-5.27	4	7.57887e+06	7722506	633782	532629	484	DDX21_HUMAN	0.000764435	0.000845549	0.00076312	0.000640622		1.06843	0.931566	1.14692
	ANR17_HUMAN	Ankyrin repeat domain-containing protein 17 OS=Homo sapiens OX=9606 GN=ANKRD17 PE=1 SV=3	275970	144.61+-70.94	2.7+-0.47	3	516255	610719	88005.5	0	144	ANR17_HUMAN	5.20715e-05	6.68686e-05	0.000105965	0		1.05769	0.942309	1.12245
	SENP3_HUMAN	Sentrin-specific protease 3 OS=Homo sapiens OX=9606 GN=SENP3 PE=1 SV=2	65595.9	130.99+-21.95	2.3+-0.43	3	0	392891	15756.5	16094.1	130	SENP3_HUMAN	0	4.30183e-05	1.8972e-05	1.93572e-05		1.05764	0.942358	1.12234
	DX39A_HUMAN	ATP-dependent RNA helicase DDX39A OS=Homo sapiens OX=9606 GN=DDX39A PE=1 SV=2	49611.2	187.48+-47.35	4.0+-0.89	4	3.9607e+06	562644	199427	141948	187	DX39A_HUMAN	0.000399492	6.16047e-05	0.000240125	0.000170728		1.05762	0.942379	1.12229
	RBM39_HUMAN	RNA-binding protein 39 OS=Homo sapiens OX=9606 GN=RBM39 PE=1 SV=2	59627.8	909.91+-59.02	22.2+-2.64	4	2.60439e+07	2.24651e+07	1.98058e+06	1.80842e+06	909	RBM39_HUMAN	0.00262689	0.00245973	0.00238477	0.00217508		1.05461	0.945392	1.11552
	MYCB2_HUMAN	E3 ubiquitin-protein ligase MYCBP2 OS=Homo sapiens OX=9606 GN=MYCBP2 PE=1 SV=4	521463	56.99+-0.0	2.0+-0.0	1	164106	0	2763.65	9578.14	56.	MYCB2_HUMAN	1.65524e-05	0	3.32764e-06	1.15202e-05		1.05429	0.945714	1.1148
	UBP7_HUMAN	Ubiquitin carboxyl-terminal hydrolase 7 OS=Homo sapiens OX=9606 GN=USP7 PE=1 SV=2	129304	625.79+-71.87	14.8+-0.98	4	7.97245e+06	9.35347e+06	552028	812090	625	UBP7_HUMAN	0.000804133	0.00102413	0.000664683	0.000976745		1.05385	0.946153	1.11382
	CNDG2_HUMAN	Condensin-2 complex subunit G2 OS=Homo sapiens OX=9606 GN=NCAPG2 PE=1 SV=1	132587	181.5+-41.92	3.6+-0.8	4	2.44418e+06	429985	126852	92960.9	181	CNDG2_HUMAN	0.00024653	4.70798e-05	0.000152739	0.000111809		1.05207	0.947933	1.10985
	TF3C1_HUMAN	General transcription factor 3C polypeptide 1 OS=Homo sapiens OX=9606 GN=GTF3C1 PE=1 SV=4	241062	988.43+-126.73	20.4+-2.94	4	1.13039e+07	1.67023e+07	978518	1.25469e+06	988	TF3C1_HUMAN	0.00114016	0.00182876	0.00117821	0.00150909		1.04979	0.95021	1.1048
	TRM1L_HUMAN	TRMT1-like protein OS=Homo sapiens OX=9606 GN=TRMT1L PE=1 SV=2	82892.6	133.43+-48.96	2.2+-0.4	4	252526	574341	21494.5	44983.6	133	TRM1L_HUMAN	2.54708e-05	6.28855e-05	2.5881e-05	5.41042e-05		1.04973	0.950273	1.10466
	LDHA_HUMAN	L-lactate dehydrogenase A chain OS=Homo sapiens OX=9606 GN=LDHA PE=1 SV=2	36950.5	158.54+-0.79	3.7+-0.47	2	1971441	772703	94574.5	119342	158	LDHA_HUMAN	0.000198847	8.46044e-05	0.000113875	0.000143539		1.04814	0.951859	1.10115
	RHG42_HUMAN	Rho GTPase-activating protein 42 OS=Homo sapiens OX=9606 GN=ARHGAP42 PE=1 SV=3	99248.2	96.41+-10.58	2.7+-0.47	2	383216	855981	27136.4	72931.2	96.	RHG42_HUMAN	3.86527e-05	9.37227e-05	3.26743e-05	8.77184e-05		1.04741	0.952594	1.09953
	SNUT2_HUMAN	U4/U6.U5 tri-snRNP-associated protein 2 OS=Homo sapiens OX=9606 GN=USP39 PE=1 SV=2	65738.9	87.52+-0.55	2.0+-0.0	2	647960	508642	54634.4	36864.1	87.	SNUT2_HUMAN	6.53558e-05	5.5692e-05	6.57839e-05	4.43385e-05		1.04726	0.952739	1.09921
	ZN326_HUMAN	DBIRD complex subunit ZNF326 OS=Homo sapiens OX=9606 GN=ZNF326 PE=1 SV=2	65955.2	119.07+-15.19	2.0+-0.0	2	387108	509524	33039.2	39171.2	119	ZN326_HUMAN	3.90453e-05	5.57885e-05	3.97817e-05	4.71134e-05		1.04368	0.956315	1.09136
	1433E_HUMAN	14-3-3 protein epsilon OS=Homo sapiens OX=9606 GN=YWHAE PE=1 SV=1	29326.5	117.69+-18.65	2.8+-0.4	4	468350	980684	60878.8	57641.9	117	1433E_HUMAN	4.72396e-05	0.000107377	7.33027e-05	6.93291e-05		1.04032	0.959682	1.08402
	NTPCR_HUMAN	Cancer-related nucleoside-triphosphatase OS=Homo sapiens OX=9606 GN=NTPCR PE=1 SV=1	20928.2	223.92+-37.53	4.0+-0.63	4	2.77736e+06	1886977	145715	229419	223	NTPCR_HUMAN	0.000280135	0.000206608	0.000175452	0.000275935		1.03769	0.962312	1.07833
	ATX2L_HUMAN	Ataxin-2-like protein OS=Homo sapiens OX=9606 GN=ATXN2L PE=1 SV=2	113589	988.92+-48.33	19.4+-1.2	4	1.406e+07	1.55233e+07	1.28545e+06	1.12904e+06	988	ATX2L_HUMAN	0.00141815	0.00169967	0.00154778	0.00135796		1.03521	0.964791	1.07299
	ZN148_HUMAN	Zinc finger protein 148 OS=Homo sapiens OX=9606 GN=ZNF148 PE=1 SV=2	89547.8	179.25+-43.64	3.2+-0.98	4	1.6578e+06	1.36815e+06	184050	64185.2	179	ZN148_HUMAN	0.000167212	0.000149801	0.000221609	7.7199e-05		1.02956	0.970438	1.06093
	WDR74_HUMAN	WD repeat-containing protein 74 OS=Homo sapiens OX=9606 GN=WDR74 PE=1 SV=1	42984.9	75.55+-0.0	2.0+-0.0	1	322221	442333	36201.1	27932.6	75.	WDR74_HUMAN	3.25005e-05	4.84317e-05	4.35888e-05	3.35961e-05		1.0237	0.9763	1.04855
	TOP2A_HUMAN	DNA topoisomerase 2-alpha OS=Homo sapiens OX=9606 GN=TOP2A PE=1 SV=3	175017	350.58+-55.12	7.4+-0.49	4	5.9218e+06	4.19627e+06	541838	298564	350	TOP2A_HUMAN	0.000597296	0.000459456	0.000652414	0.000359099		1.02187	0.978127	1.04472
	GTPB1_HUMAN	GTP-binding protein 1 OS=Homo sapiens OX=9606 GN=GTPBP1 PE=1 SV=3	73035.3	628.28+-139.29	11.0+-3.03	4	1.00673e+07	3.62375e+06	622796	506148	628	GTPB1_HUMAN	0.00101543	0.00039677	0.000749893	0.000608772		1.01932	0.980679	1.0394
	NHRF1_HUMAN	Na(+)/H(+) exchange regulatory cofactor NHE-RF1 OS=Homo sapiens OX=9606 GN=SLC9A3R1 PE=1 SV=4	39129.7	77.3+-0.0	2.0+-0.0	1	513218	624226	59326.5	36715.6	77.	NHRF1_HUMAN	5.17652e-05	6.83475e-05	7.14335e-05	4.41598e-05		1.01917	0.980827	1.0391
	COPA_HUMAN	Coatomer subunit alpha OS=Homo sapiens OX=9606 GN=COPA PE=1 SV=2	139797	467.41+-73.71	11.2+-2.04	4	1.15541e+07	5.18282e+06	701602	685457	467	COPA_HUMAN	0.00116539	0.000567475	0.000844781	0.000824437		1.01871	0.981292	1.03813
	RPAB5_HUMAN	DNA-directed RNA polymerases I, II, and III subunit RPABC5 OS=Homo sapiens OX=9606 GN=POLR2L PE=1 SV=1	7868.07	82.72+-21.35	2.3+-0.43	3	1.26236e+06	187596	51242.7	68357.2	82.	RPAB5_HUMAN	0.000127327	2.05402e-05	6.17e-05	8.2217e-05		1.01354	0.986463	1.02745
	DDX56_HUMAN	Probable ATP-dependent RNA helicase DDX56 OS=Homo sapiens OX=9606 GN=DDX56 PE=1 SV=1	62007.1	195.07+-25.74	4.8+-0.4	4	1.75553e+06	4.31675e+06	237363	289482	195	DDX56_HUMAN	0.00017707	0.000472648	0.000285803	0.000348176		1.01226	0.98774	1.02483
	MYNN_HUMAN	Myoneurin OS=Homo sapiens OX=9606 GN=MYNN PE=1 SV=1	70006.7	136.64+-0.0	2.0+-0.0	1	0	163308	0	14561.4	136	MYNN_HUMAN	0	1.78808e-05	0	1.75138e-05		1.01037	0.989631	1.02096
	RS3A_HUMAN	40S ribosomal protein S3a OS=Homo sapiens OX=9606 GN=RPS3A PE=1 SV=2	30153.8	217.16+-66.52	3.5+-0.5	3	1.69321e+06	1620787	83181.6	207294	217	RS3A_HUMAN	0.000170784	0.000177462	0.000100157	0.000249323		0.998232	1.00177	0.99647
	FLNA_HUMAN	Filamin-A OS=Homo sapiens OX=9606 GN=FLNA PE=1 SV=4	283301	1348.01+-322.98	25.4+-4.54	4	1.39012e+07	1.33157e+07	1.27728e+06	1.11068e+06	134	FLNA_HUMAN	0.00140213	0.00145796	0.00153795	0.00133587		0.997605	1.00239	0.995222
	ZBT43_HUMAN	Zinc finger and BTB domain-containing protein 43 OS=Homo sapiens OX=9606 GN=ZBTB43 PE=1 SV=1	53281.2	117.84+-5.75	2.0+-0.0	3	812763	1399834	92753.7	104008	117	ZBT43_HUMAN	8.19785e-05	0.00015327	0.000111682	0.000125096		0.996759	1.00324	0.993538
	K1671_HUMAN	Uncharacterized protein KIAA1671 OS=Homo sapiens OX=9606 GN=KIAA1671 PE=1 SV=2	197617	138.26+-34.89	2.8+-0.4	4	432079	212630	28129.9	27941.3	138	K1671_HUMAN	4.35812e-05	2.32812e-05	3.38705e-05	3.36065e-05		0.995425	1.00458	0.990891
	EXOSX_HUMAN	Exosome component 10 OS=Homo sapiens OX=9606 GN=EXOSC10 PE=1 SV=2	101566	798.74+-68.84	16.0+-1.67	4	1.38871e+07	1.40881e+07	1.31472e+06	1.1699e+06	798	EXOSX_HUMAN	0.00140071	0.00154253	0.00158302	0.0014071		0.992099	1.0079	0.984321
	PTBP1_HUMAN	Polypyrimidine tract-binding protein 1 OS=Homo sapiens OX=9606 GN=PTBP1 PE=1 SV=1	57356.7	695.11+-85.8	19.2+-4.66	4	1.12906e+07	1.38828e+07	760779	1.49229e+06	695	PTBP1_HUMAN	0.00113881	0.00152005	0.000916035	0.00179486		0.990311	1.00969	0.980808
	SERA_HUMAN	D-3-phosphoglycerate dehydrogenase OS=Homo sapiens OX=9606 GN=PHGDH PE=1 SV=4	57355.7	140.09+-37.57	2.8+-0.4	4	275642	995623	36512	79910.1	140	SERA_HUMAN	2.78023e-05	0.000109012	4.39631e-05	9.61123e-05		0.988223	1.01178	0.976721
	KTNA1_HUMAN	Katanin p60 ATPase-containing subunit A1 OS=Homo sapiens OX=9606 GN=KATNA1 PE=1 SV=1	56214.4	105.22+-15.78	2.0+-0.0	4	885185	1.04278e+06	69756.3	103638	105	KTNA1_HUMAN	8.92833e-05	0.000114175	8.39918e-05	0.000124652		0.987418	1.01258	0.975149
	CARL1_HUMAN	F-actin-uncapping protein LRRC16A OS=Homo sapiens OX=9606 GN=CARMIL1 PE=1 SV=1	152717	131.07+-52.57	3.6+-1.62	4	727372	1.10787e+06	61742.7	105306	131	CARL1_HUMAN	7.33656e-05	0.000121302	7.43428e-05	0.000126657		0.983996	1.016	0.968496
	TRPT1_HUMAN	tRNA 2'-phosphotransferase 1 OS=Homo sapiens OX=9606 GN=TRPT1 PE=1 SV=2	27895.7	82.7+-0.0	2.0+-0.0	1	481762	414056	59949	20661.6	82.	TRPT1_HUMAN	4.85924e-05	4.53356e-05	7.21831e-05	2.48509e-05		0.983736	1.01626	0.967992
	MYCPP_HUMAN	C-myc promoter-binding protein OS=Homo sapiens OX=9606 GN=DENND4A PE=1 SV=2	211791	93.22+-0.0	2.0+-0.0	1	183851	172437	13291.2	19118	93.	MYCPP_HUMAN	1.8544e-05	1.88804e-05	1.60036e-05	2.29942e-05		0.97941	1.02059	0.959651
	BRCA1_HUMAN	Breast cancer type 1 susceptibility protein OS=Homo sapiens OX=9606 GN=BRCA1 PE=1 SV=2	210101	211.11+-0.0	4.0+-0.0	1	946524	0	47414.7	35375.2	211	BRCA1_HUMAN	9.54701e-05	0	5.70908e-05	4.25478e-05		0.978635	1.02136	0.958164
	CHERP_HUMAN	Calcium homeostasis endoplasmic reticulum protein OS=Homo sapiens OX=9606 GN=CHERP PE=1 SV=3	104150	477.36+-74.55	14.6+-2.24	4	1.46288e+07	8.66995e+06	1.13169e+06	974067	477	CHERP_HUMAN	0.00147552	0.000949287	0.00136264	0.00117156		0.97794	1.02206	0.956832
	BUB3_HUMAN	Mitotic checkpoint protein BUB3 OS=Homo sapiens OX=9606 GN=BUB3 PE=1 SV=1	37587.3	438.98+-84.15	9.8+-2.04	4	1.44419e+07	8.58333e+06	977461	1.12179e+06	438	BUB3_HUMAN	0.00145667	0.000939803	0.00117694	0.00134924		0.973653	1.02635	0.948658
	ZN687_HUMAN	Zinc finger protein 687 OS=Homo sapiens OX=9606 GN=ZNF687 PE=1 SV=1	131898	120.03+-8.55	2.0+-0.0	2	123630	104313	10461.1	10596.5	120	ZN687_HUMAN	1.24698e-05	1.14214e-05	1.2596e-05	1.2745e-05		0.970553	1.02945	0.94279
	JHD2C_HUMAN	Probable JmjC domain-containing histone demethylation protein 2C OS=Homo sapiens OX=9606 GN=JMJD1C PE=1 SV=2	286401	320.59+-135.06	6.4+-2.24	4	2.02942e+06	1.26794e+06	185312	118722	320	JHD2C_HUMAN	0.000204695	0.000138829	0.000223129	0.000142793		0.968427	1.03157	0.938786
	FOXC1_HUMAN	Forkhead box protein C1 OS=Homo sapiens OX=9606 GN=FOXC1 PE=1 SV=3	57095.6	71.32+-1.01	2.0+-0.0	2	125727	481940	57395.4	1066.65	71.	FOXC1_HUMAN	1.26813e-05	5.27684e-05	6.91084e-05	1.28292e-06		0.963622	1.03638	0.929797
	ZC12A_HUMAN	Endoribonuclease ZC3H12A OS=Homo sapiens OX=9606 GN=ZC3H12A PE=1 SV=1	66285.2	90.44+-0.0	2.0+-0.0	1	0	301925	10494.6	19156.9	90.	ZC12A_HUMAN	0	3.30583e-05	1.26363e-05	2.30411e-05		0.961897	1.0381	0.926591
	TBG1_HUMAN	Tubulin gamma-1 chain OS=Homo sapiens OX=9606 GN=TUBG1 PE=1 SV=2	51479.9	157.22+-43.46	4.6+-2.06	4	2.94521e+06	3.73081e+06	277358	361341	157	TBG1_HUMAN	0.000297065	0.000408492	0.00033396	0.000434604		0.957258	1.04274	0.918021
	RBP56_HUMAN	TATA-binding protein-associated factor 2N OS=Homo sapiens OX=9606 GN=TAF15 PE=1 SV=1	62021.2	244.86+-39.38	4.0+-0.0	4	1.7739e+06	2.42881e+06	234324	172074	244	RBP56_HUMAN	0.000178923	0.000265934	0.000282143	0.000206963		0.952621	1.04738	0.909529
	PRDX1_HUMAN	Peroxiredoxin-1 OS=Homo sapiens OX=9606 GN=PRDX1 PE=1 SV=1	22324.4	232.58+-41.41	5.4+-1.2	4	5290182	2.41956e+06	158837	572391	232	PRDX1_HUMAN	0.000533589	0.000264921	0.000191252	0.000688446		0.951622	1.04838	0.907708
	RBP2_HUMAN	E3 SUMO-protein ligase RanBP2 OS=Homo sapiens OX=9606 GN=RANBP2 PE=1 SV=2	362365	660.31+-86.3	15.2+-1.17	4	4.1583e+06	4.96073e+06	561069	320269	660	RBP2_HUMAN	0.000419422	0.000543158	0.000675569	0.000385205		0.95147	1.04853	0.907432
	FUS_HUMAN	RNA-binding protein FUS OS=Homo sapiens OX=9606 GN=FUS PE=1 SV=1	53621.9	486.88+-126.14	13.2+-0.98	4	7.47725e+06	7.13534e+06	531311	887324	486	FUS_HUMAN	0.000754185	0.00078126	0.000639738	0.00106723		0.947099	1.0529	0.899514
	U2AF1_HUMAN	Splicing factor U2AF 35 kDa subunit OS=Homo sapiens OX=9606 GN=U2AF1 PE=1 SV=3	28367.7	173.71+-25.68	4.8+-1.17	4	3566958	1.66782e+06	161315	355085	173	U2AF1_HUMAN	0.000359777	0.000182612	0.000194236	0.00042708		0.932177	1.06782	0.87297
	1433B_HUMAN	14-3-3 protein beta/alpha OS=Homo sapiens OX=9606 GN=YWHAB PE=1 SV=3	28178.9	105.5+-25.95	3.5+-1.5	2	0	3.88691e+06	405133	0	105	1433B_HUMAN	0	0.000425584	0.00048781	0		0.931873	1.06813	0.872437
	UBF1_HUMAN	Nucleolar transcription factor 1 OS=Homo sapiens OX=9606 GN=UBTF PE=1 SV=1	89692.4	206.62+-44.01	7.0+-1.26	4	2.10043e+06	3.14166e+06	285061	247520	206	UBF1_HUMAN	0.000211858	0.000343985	0.000343234	0.000297706		0.928895	1.07111	0.86723
	STN1_HUMAN	CST complex subunit STN1 OS=Homo sapiens OX=9606 GN=STN1 PE=1 SV=2	42434.7	53.42+-0.0	2.0+-0.0	1	114659	71202	2901.63	15696.3	53.	STN1_HUMAN	1.15649e-05	7.79602e-06	3.49378e-06	1.88788e-05		0.927837	1.07216	0.865388
	RBBP7_HUMAN	Histone-binding protein RBBP7 OS=Homo sapiens OX=9606 GN=RBBP7 PE=1 SV=1	48132.3	324.04+-139.74	6.0+-2.1	4	3.23507e+06	2.30708e+06	262989	293675	324	RBBP7_HUMAN	0.000326302	0.000252606	0.000316659	0.000353219		0.927153	1.07285	0.864199
	SKP1_HUMAN	S-phase kinase-associated protein 1 OS=Homo sapiens OX=9606 GN=SKP1 PE=1 SV=2	18817.3	186.48+-18.06	3.7+-0.47	2	628698	638331	55834.1	73266.6	186	SKP1_HUMAN	6.34129e-05	6.98919e-05	6.72284e-05	8.81218e-05		0.923627	1.07637	0.858092
	DNJA1_HUMAN	DnaJ homolog subfamily A member 1 OS=Homo sapiens OX=9606 GN=DNAJA1 PE=1 SV=2	45580.7	470.97+-78.33	10.8+-1.83	4	7.11311e+06	1.24022e+07	1.15589e+06	863189	470	DNJA1_HUMAN	0.000717456	0.00135794	0.00139177	0.0010382		0.921297	1.0787	0.854078
	FGD4_HUMAN	FYVE, RhoGEF and PH domain-containing protein 4 OS=Homo sapiens OX=9606 GN=FGD4 PE=1 SV=2	87597.8	105.41+-32.44	2.0+-0.0	2	108498	736555	0	89267.9	105	FGD4_HUMAN	1.09436e-05	8.06466e-05	0	0.000107367		0.9207	1.0793	0.853054
	ZBT21_HUMAN	Zinc finger and BTB domain-containing protein 21 OS=Homo sapiens OX=9606 GN=ZBTB21 PE=1 SV=2	120564	417.21+-81.54	7.0+-1.26	4	1.08634e+06	2.22531e+06	168403	176070	417	ZBT21_HUMAN	0.000109573	0.000243653	0.000202769	0.00021177		0.920141	1.07986	0.852094
	WDR1_HUMAN	WD repeat-containing protein 1 OS=Homo sapiens OX=9606 GN=WDR1 PE=1 SV=4	66836.1	120.34+-24.13	2.4+-0.49	4	765158	1.15131e+06	92945.1	105291	120	WDR1_HUMAN	7.71768e-05	0.000126059	0.000111913	0.000126639		0.92006	1.07994	0.851955
	ZN629_HUMAN	Zinc finger protein 629 OS=Homo sapiens OX=9606 GN=ZNF629 PE=1 SV=2	98896.9	281.37+-42.38	6.6+-0.49	4	3.03081e+06	2.4428e+06	263896	297922	281	ZN629_HUMAN	0.0003057	0.000267466	0.00031775	0.000358327		0.917621	1.08238	0.847782
	DJC10_HUMAN	DnaJ homolog subfamily C member 10 OS=Homo sapiens OX=9606 GN=DNAJC10 PE=1 SV=2	92332.8	258.56+-62.53	5.6+-1.2	4	2.07127e+06	1.5888e+06	159249	219510	258	DJC10_HUMAN	0.000208917	0.00017396	0.000191747	0.000264017		0.913088	1.08691	0.840076
	DDX17_HUMAN	Probable ATP-dependent RNA helicase DDX17 OS=Homo sapiens OX=9606 GN=DDX17 PE=1 SV=2	80906.3	497.97+-208.31	10.8+-4.45	4	2295505	2.91271e+07	1.10134e+06	2.30655e+06	497	DDX17_HUMAN	0.000231534	0.00318917	0.0013261	0.00277421		0.909639	1.09036	0.834255
	ANGE2_HUMAN	Protein angel homolog 2 OS=Homo sapiens OX=9606 GN=ANGEL2 PE=2 SV=1	63439.5	108.18+-2.56	2.0+-0.0	2	330750	209263	23712.1	32402.3	108	ANGE2_HUMAN	3.33607e-05	2.29126e-05	2.85512e-05	3.8972e-05		0.909126	1.09087	0.833393
	NSUN2_HUMAN	RNA cytosine C(5)-methyltransferase NSUN2 OS=Homo sapiens OX=9606 GN=NSUN2 PE=1 SV=2	87214.1	261.53+-20.15	5.0+-0.63	4	3.2517e+06	2.10213e+06	342996	215266	261	NSUN2_HUMAN	0.000327979	0.000230166	0.000412993	0.000258912		0.907516	1.09248	0.83069
	DHX29_HUMAN	ATP-dependent RNA helicase DHX29 OS=Homo sapiens OX=9606 GN=DHX29 PE=1 SV=2	156222	227.87+-0.0	6.0+-0.0	1	1.03263e+06	244914	71019	60989.4	227	DHX29_HUMAN	0.000104155	2.6816e-05	8.55122e-05	7.33553e-05		0.903752	1.09625	0.824404
	RBPS2_HUMAN	RNA-binding protein with multiple splicing 2 OS=Homo sapiens OX=9606 GN=RBPMS2 PE=1 SV=1	22539.4	90.73+-0.0	3.0+-0.0	1	0	281986	31165.9	0	90.	RBPS2_HUMAN	0	3.08751e-05	3.75261e-05	0		0.902765	1.09723	0.822764
	DDX47_HUMAN	Probable ATP-dependent RNA helicase DDX47 OS=Homo sapiens OX=9606 GN=DDX47 PE=1 SV=1	50899.8	496.22+-127.49	12.4+-2.87	4	8.21205e+06	7.04356e+06	785919	856824	496	DDX47_HUMAN	0.0008283	0.00077121	0.000946305	0.00103055		0.894489	1.10551	0.809119
	DYHC1_HUMAN	Cytoplasmic dynein 1 heavy chain 1 OS=Homo sapiens OX=9606 GN=DYNC1H1 PE=1 SV=5	534809	1031.24+-120.75	21.6+-3.2	4	6.13126e+06	7.27907e+06	789247	668385	103	DYHC1_HUMAN	0.000618423	0.000796997	0.000950312	0.000803904		0.893112	1.10689	0.806867
	TBB4A_HUMAN	Tubulin beta-4A chain OS=Homo sapiens OX=9606 GN=TUBB4A PE=1 SV=2	50010.1	928.07+-78.65	36.8+-5.15	4	1.34229e+08	9.44355e+07	1.31385e+07	1.16307e+07	928	TBB4A_HUMAN	0.0135389	0.0103399	0.0158198	0.0139889		0.889547	1.11045	0.801067
	KI18B_HUMAN	Kinesin-like protein KIF18B OS=Homo sapiens OX=9606 GN=KIF18B PE=1 SV=4	93865.2	622.28+-71.78	11.2+-1.6	4	2.9956e+06	3.02496e+06	257036	409221	622	KI18B_HUMAN	0.000302148	0.000331208	0.000309491	0.000492193		0.882702	1.1173	0.790032
	SR140_HUMAN	U2 snRNP-associated SURP motif-containing protein OS=Homo sapiens OX=9606 GN=U2SURP PE=1 SV=2	118675	788.6+-125.43	24.8+-2.71	4	1.30728e+07	1.01051e+07	1.09968e+06	1.45964e+06	788	SR140_HUMAN	0.00131858	0.00110642	0.0013241	0.00175559		0.881067	1.11893	0.787417
	U5S1_HUMAN	116 kDa U5 small nuclear ribonucleoprotein component OS=Homo sapiens OX=9606 GN=EFTUD2 PE=1 SV=1	110336	128.25+-99.92	3.0+-1.26	4	1.12992e+06	1717018	158895	168584	128	U5S1_HUMAN	0.000113969	0.000187999	0.000191322	0.000202765		0.867655	1.13235	0.766246
	SERPH_HUMAN	Serpin H1 OS=Homo sapiens OX=9606 GN=SERPINH1 PE=1 SV=2	46525.2	89.95+-20.93	2.8+-0.43	3	405317	2.47018e+06	196503	141833	89.	SERPH_HUMAN	4.08819e-05	0.000270464	0.000236604	0.000170591		0.866606	1.13339	0.764611
	DHX15_HUMAN	Pre-mRNA-splicing factor ATP-dependent RNA helicase DHX15 OS=Homo sapiens OX=9606 GN=DHX15 PE=1 SV=2	91673.5	2099.17+-209.14	102.2+-11.96	4	8.41264e+07	7.75175e+07	9.15561e+06	9.42112e+06	209	DHX15_HUMAN	0.00848532	0.00848751	0.011024	0.0113313		0.863139	1.13686	0.75923
	EXOS3_HUMAN	Exosome complex component RRP40 OS=Homo sapiens OX=9606 GN=EXOSC3 PE=1 SV=3	30009.5	167.54+-50.44	3.3+-0.83	3	87768.1	1.22147e+06	60653.9	96582.1	167	EXOS3_HUMAN	8.85264e-06	0.00013374	7.30318e-05	0.000116165		0.859539	1.14046	0.753676
	H2AV_HUMAN	Histone H2A.V OS=Homo sapiens OX=9606 GN=H2AFV PE=1 SV=3	13500.5	103.65+-8.89	3.4+-0.49	4	1.62389e+07	1.66872e+07	2.15455e+06	1.75525e+06	103	H2AV_HUMAN	0.00163792	0.00182711	0.00259424	0.00211113		0.84819	1.15181	0.736398
	RS23_HUMAN	40S ribosomal protein S23 OS=Homo sapiens OX=9606 GN=RPS23 PE=1 SV=3	15968.8	161.73+-7.59	3.8+-0.98	4	3.28757e+06	3.02139e+06	393036	360252	161	RS23_HUMAN	0.000331597	0.000330816	0.000473245	0.000433295		0.844401	1.1556	0.730704
	MYO1E_HUMAN	Unconventional myosin-Ie OS=Homo sapiens OX=9606 GN=MYO1E PE=1 SV=2	127552	456.35+-156.86	9.4+-2.94	4	2.66441e+06	2.58569e+06	217261	411334	456	MYO1E_HUMAN	0.000268743	0.000283111	0.000261598	0.000494734		0.843693	1.15631	0.729645
	RFC4_HUMAN	Replication factor C subunit 4 OS=Homo sapiens OX=9606 GN=RFC4 PE=1 SV=2	40170.1	525.58+-72.07	10.4+-1.02	4	5.34664e+06	4891412	750985	481706	525	RFC4_HUMAN	0.000539283	0.000535568	0.000904242	0.000579375		0.84023	1.15977	0.72448
	PPIL4_HUMAN	Peptidyl-prolyl cis-trans isomerase-like 4 OS=Homo sapiens OX=9606 GN=PPIL4 PE=1 SV=1	57702.7	564.34+-40.92	12.8+-0.98	4	5123615	4.97631e+06	677009	543450	564	PPIL4_HUMAN	0.000516788	0.000544864	0.00081517	0.000653637		0.839099	1.1609	0.722799
	ROAA_HUMAN	Heterogeneous nuclear ribonucleoprotein A/B OS=Homo sapiens OX=9606 GN=HNRNPAB PE=1 SV=2	36316.4	73.54+-0.0	2.0+-0.0	1	67269.4	56593	10122.8	5287.49	73.	ROAA_HUMAN	6.78506e-06	6.19646e-06	1.21886e-05	6.35956e-06		0.823448	1.17655	0.699882
	CC120_HUMAN	Coiled-coil domain-containing protein 120 OS=Homo sapiens OX=9606 GN=CCDC120 PE=1 SV=1	68153	61.73+-0.0	2.0+-0.0	1	350803	0	42071	0	61.	CC120_HUMAN	3.53833e-05	0	5.06566e-05	0		0.822487	1.17751	0.698494
	MATK_HUMAN	Megakaryocyte-associated tyrosine-protein kinase OS=Homo sapiens OX=9606 GN=MATK PE=1 SV=1	57003.3	217.53+-38.44	4.2+-0.75	4	1.09854e+06	1.0125e+06	122997	141085	217	MATK_HUMAN	0.000110803	0.00011086	0.000148097	0.000169691		0.82181	1.17819	0.697519
	JAK1_HUMAN	Tyrosine-protein kinase JAK1 OS=Homo sapiens OX=9606 GN=JAK1 PE=1 SV=2	135016	95.98+-11.73	2.3+-0.43	3	190228	393020	37183.9	37069.7	95.	JAK1_HUMAN	1.91871e-05	4.30324e-05	4.47722e-05	4.45858e-05		0.82096	1.17904	0.696296
	UBP1_HUMAN	Ubiquitin carboxyl-terminal hydrolase 1 OS=Homo sapiens OX=9606 GN=USP1 PE=1 SV=1	89178.6	143.12+-15.94	2.3+-0.43	3	982428	445380	99805	80016.9	143	UBP1_HUMAN	9.90916e-05	4.87653e-05	0.000120173	9.62408e-05		0.811798	1.1882	0.683215
	RL24_HUMAN	60S ribosomal protein L24 OS=Homo sapiens OX=9606 GN=RPL24 PE=1 SV=1	17881.9	191.86+-79.39	6.4+-0.49	4	10232806	5.08166e+06	1.13983e+06	803388	191	RL24_HUMAN	0.00103212	0.000556399	0.00137245	0.000966279		0.808974	1.19103	0.679225
	PABP1_HUMAN	Polyadenylate-binding protein 1 OS=Homo sapiens OX=9606 GN=PABPC1 PE=1 SV=2	70853.9	132.7+-48.61	3.0+-0.89	4	1.1773e+06	585793	74468.1	149915	132	PABP1_HUMAN	0.000118747	6.41394e-05	8.96652e-05	0.000180312		0.80769	1.19231	0.677416
	QKI_HUMAN	Protein quaking OS=Homo sapiens OX=9606 GN=QKI PE=1 SV=1	37760.8	116.41+-31.47	2.0+-0.0	2	669814	531109	100725	55221.9	116	QKI_HUMAN	6.75601e-05	5.8152e-05	0.00012128	6.64184e-05		0.802219	1.19778	0.669755
	LC7L3_HUMAN	Luc7-like protein 3 OS=Homo sapiens OX=9606 GN=LUC7L3 PE=1 SV=2	51834.3	522.74+-53.0	14.6+-3.83	4	5.42916e+06	5.84762e+06	651387	825236	522	LC7L3_HUMAN	0.000547607	0.000640265	0.000784319	0.000992557		0.801331	1.19867	0.668517
	TCPG_HUMAN	T-complex protein 1 subunit gamma OS=Homo sapiens OX=9606 GN=CCT3 PE=1 SV=4	61065.5	729.18+-173.11	16.0+-3.35	4	9.98156e+06	9.10879e+06	1.24683e+06	1.26508e+06	729	TCPG_HUMAN	0.00100678	0.000997336	0.00150128	0.00152158		0.797344	1.20266	0.662985
	PPHLN_HUMAN	Periphilin-1 OS=Homo sapiens OX=9606 GN=PPHLN1 PE=1 SV=2	52819.1	51.11+-0.0	2.0+-0.0	1	0	177702	24437.6	0	51.	PPHLN_HUMAN	0	1.94569e-05	2.94247e-05	0		0.796083	1.20392	0.661244
	NOP2_HUMAN	Probable 28S rRNA (cytosine(4447)-C(5))-methyltransferase OS=Homo sapiens OX=9606 GN=NOP2 PE=1 SV=2	89589.2	198.92+-41.21	3.8+-0.98	4	1.04568e+06	752362	92119.5	144387	198	NOP2_HUMAN	0.000105472	8.23773e-05	0.000110919	0.000173662		0.795246	1.20475	0.660091
	EIF2D_HUMAN	Eukaryotic translation initiation factor 2D OS=Homo sapiens OX=9606 GN=EIF2D PE=1 SV=3	65292.8	214.49+-84.42	4.4+-1.74	4	196923	721521	84490.2	41981.5	214	EIF2D_HUMAN	1.98624e-05	7.90005e-05	0.000101732	5.04935e-05		0.787474	1.21253	0.649449
	RAGP1_HUMAN	Ran GTPase-activating protein 1 OS=Homo sapiens OX=9606 GN=RANGAP1 PE=1 SV=1	63958.5	150.95+-64.67	3.0+-1.26	4	748673	663924	106154	85044.4	150	RAGP1_HUMAN	7.55141e-05	7.26941e-05	0.000127817	0.000102288		0.783521	1.21648	0.64409
	PDE3A_HUMAN	cGMP-inhibited 3',5'-cyclic phosphodiesterase A OS=Homo sapiens OX=9606 GN=PDE3A PE=1 SV=3	126440	75.96+-0.0	2.0+-0.0	1	255481	0	13415.8	20239	75.	PDE3A_HUMAN	2.57688e-05	0	1.61536e-05	2.43426e-05		0.777751	1.22225	0.636328
	CDC6_HUMAN	Cell division control protein 6 homolog OS=Homo sapiens OX=9606 GN=CDC6 PE=1 SV=1	63649.9	73.88+-0.0	2.0+-0.0	1	390463	725982	71446	85121.9	73.	CDC6_HUMAN	3.93836e-05	7.94889e-05	8.60263e-05	0.000102381		0.773709	1.22629	0.630934
	DIAP3_HUMAN	Protein diaphanous homolog 3 OS=Homo sapiens OX=9606 GN=DIAPH3 PE=1 SV=4	138150	1372.91+-124.65	32.6+-5.57	4	2.09326e+07	1.29313e+07	2.72196e+06	1.93712e+06	137	DIAP3_HUMAN	0.00211135	0.00141587	0.00327744	0.00232988		0.772281	1.22772	0.629037
	TUT7_HUMAN	Terminal uridylyltransferase 7 OS=Homo sapiens OX=9606 GN=TUT7 PE=1 SV=1	173288	271.31+-44.8	6.6+-1.62	4	1.93031e+06	2.1198e+06	365353	198443	271	TUT7_HUMAN	0.000194699	0.0002321	0.000439912	0.000238679		0.772215	1.22779	0.628949
	UBP3_HUMAN	Ubiquitin carboxyl-terminal hydrolase 3 OS=Homo sapiens OX=9606 GN=USP3 PE=1 SV=2	60455.5	438.75+-172.95	9.0+-4.15	4	5.28218e+06	2.05341e+06	516290	486157	438	UBP3_HUMAN	0.000532782	0.000224832	0.000621652	0.000584728		0.771503	1.2285	0.628005
	ANLN_HUMAN	Anillin OS=Homo sapiens OX=9606 GN=ANLN PE=1 SV=2	125490	2104.92+-126.4	56.2+-2.48	4	4.92845e+07	5.10584e+07	7.19474e+06	6.8406e+06	210	ANLN_HUMAN	0.00497103	0.00559047	0.00866301	0.00822757		0.76945	1.23055	0.625289
	WAC_HUMAN	WW domain-containing adapter protein with coiled-coil OS=Homo sapiens OX=9606 GN=WAC PE=1 SV=3	71023.3	276.85+-38.8	10.6+-3.38	4	2.67613e+06	4.27294e+06	416672	564144	276	WAC_HUMAN	0.000269925	0.000467851	0.000501704	0.000678527		0.769315	1.23068	0.625111
	PRKDC_HUMAN	DNA-dependent protein kinase catalytic subunit OS=Homo sapiens OX=9606 GN=PRKDC PE=1 SV=3	473749	3988.2+-647.78	89.4+-17.49	4	5.0785e+07	4.4571e+07	6.10402e+06	7.21959e+06	398	PRKDC_HUMAN	0.00512238	0.00488014	0.0073497	0.0086834		0.768372	1.23163	0.623867
	HNRH2_HUMAN	Heterogeneous nuclear ribonucleoprotein H2 OS=Homo sapiens OX=9606 GN=HNRNPH2 PE=1 SV=1	49517.4	480.81+-62.18	15.4+-1.2	4	1.38877e+07	1.39604e+07	2.52898e+06	1.37615e+06	480	HNRH2_HUMAN	0.00140077	0.00152854	0.00304508	0.00165517		0.767886	1.23211	0.623226
	SLTM_HUMAN	SAFB-like transcription modulator OS=Homo sapiens OX=9606 GN=SLTM PE=1 SV=2	117364	793.89+-90.75	20.6+-3.61	4	1.57757e+07	1.46396e+07	2.27607e+06	1.99467e+06	793	SLTM_HUMAN	0.0015912	0.00160292	0.00274056	0.0023991		0.766547	1.23345	0.621465
	PPIA_HUMAN	Peptidyl-prolyl cis-trans isomerase A OS=Homo sapiens OX=9606 GN=PPIA PE=1 SV=2	18229	176.93+-47.32	4.8+-0.98	4	2.07727e+06	1486243	303567	199355	176	PPIA_HUMAN	0.000209521	0.000162731	0.000365518	0.000239775		0.761607	1.23839	0.614996
	HUTH_HUMAN	Histidine ammonia-lyase OS=Homo sapiens OX=9606 GN=HAL PE=1 SV=1	73336.1	108.27+-0.0	2.0+-0.0	1	0	319792	32601.2	14836	108	HUTH_HUMAN	0	3.50145e-05	3.92542e-05	1.78441e-05		0.760253	1.23975	0.613232
	SRC8_HUMAN	Src substrate cortactin OS=Homo sapiens OX=9606 GN=CTTN PE=1 SV=2	61719.6	901.91+-171.31	21.0+-5.4	4	7.9496e+06	1.28817e+07	1.23815e+06	1.76183e+06	901	SRC8_HUMAN	0.000801828	0.00141044	0.00149083	0.00211905		0.759948	1.24005	0.612836
	ABT1_HUMAN	Activator of basal transcription 1 OS=Homo sapiens OX=9606 GN=ABT1 PE=1 SV=1	31117	106.62+-9.18	2.0+-0.0	3	708462	1163616	143776	125968	106	ABT1_HUMAN	7.14583e-05	0.000127406	0.000173118	0.000151509		0.759763	1.24024	0.612595
	OTUD4_HUMAN	OTU domain-containing protein 4 OS=Homo sapiens OX=9606 GN=OTUD4 PE=1 SV=4	124823	66.25+-7.91	2.0+-0.0	2	270495	244632	60790.2	12574.7	66.	OTUD4_HUMAN	2.72832e-05	2.67852e-05	7.31959e-05	1.51243e-05		0.759448	1.24055	0.612185
	SAS10_HUMAN	Something about silencing protein 10 OS=Homo sapiens OX=9606 GN=UTP3 PE=1 SV=1	54639.1	63.39+-0.0	2.0+-0.0	1	184314	240038	31280.1	29713.2	63.	SAS10_HUMAN	1.85907e-05	2.62822e-05	3.76636e-05	3.57377e-05		0.758794	1.24121	0.611336
	PELO_HUMAN	Protein pelota homolog OS=Homo sapiens OX=9606 GN=PELO PE=1 SV=2	43788.2	626.31+-65.3	12.0+-0.63	4	7.46161e+06	6.88687e+06	1.24609e+06	803990	626	PELO_HUMAN	0.000752607	0.000754054	0.00150039	0.000967003		0.75825	1.24175	0.61063
	KCC2G_HUMAN	Calcium/calmodulin-dependent protein kinase type II subunit gamma OS=Homo sapiens OX=9606 GN=CAMK2G PE=1 SV=4	63309	230.9+-76.39	4.4+-1.62	4	722228	1.91103e+06	270215	114660	230	KCC2G_HUMAN	7.28468e-05	0.000209241	0.000325359	0.000137908		0.756922	1.24308	0.60891
	MAGD2_HUMAN	Melanoma-associated antigen D2 OS=Homo sapiens OX=9606 GN=MAGED2 PE=1 SV=2	65085.4	142.31+-17.63	3.5+-1.5	3	357756	531089	30355.9	98340	142	MAGD2_HUMAN	3.60847e-05	5.81497e-05	3.65508e-05	0.000118279		0.756708	1.24329	0.608632
	PI51A_HUMAN	Phosphatidylinositol 4-phosphate 5-kinase type-1 alpha OS=Homo sapiens OX=9606 GN=PIP5K1A PE=1 SV=1	63049.8	400.68+-74.81	9.8+-1.17	4	4.91695e+06	4.29012e+06	703695	615542	400	PI51A_HUMAN	0.000495943	0.000469732	0.000847301	0.000740347		0.756406	1.24359	0.608243
	VRK1_HUMAN	Serine/threonine-protein kinase VRK1 OS=Homo sapiens OX=9606 GN=VRK1 PE=1 SV=1	45789.6	60.0+-17.66	2.0+-0.0	2	0	889153	69563	64370.5	60.	VRK1_HUMAN	0	9.73547e-05	8.37591e-05	7.7422e-05		0.753124	1.24688	0.604009
	SC23A_HUMAN	Protein transport protein Sec23A OS=Homo sapiens OX=9606 GN=SEC23A PE=1 SV=2	87017.6	230.42+-9.47	4.0+-0.0	2	918550	370389	97871.4	87948.3	230	SC23A_HUMAN	9.26486e-05	4.05545e-05	0.000117845	0.00010578		0.746596	1.2534	0.595654
	CLAP1_HUMAN	CLIP-associating protein 1 OS=Homo sapiens OX=9606 GN=CLASP1 PE=1 SV=1	170373	1098.07+-268.95	20.4+-4.13	4	6.63725e+06	8.10152e+06	1.12592e+06	1.0578e+06	109	CLAP1_HUMAN	0.000669459	0.000887048	0.00135569	0.00127228		0.743944	1.25606	0.592286
	SRG2B_HUMAN	SLIT-ROBO Rho GTPase-activating protein 2B OS=Homo sapiens OX=9606 GN=SRGAP2B PE=3 SV=1	53999	143.29+-20.39	2.3+-0.43	3	1.1136e+06	0	93680.7	63940.6	143	SRG2B_HUMAN	0.000112322	0	0.000112799	7.69049e-05		0.743791	1.25621	0.592092
	DNJA2_HUMAN	DnaJ homolog subfamily A member 2 OS=Homo sapiens OX=9606 GN=DNAJA2 PE=1 SV=1	46343.8	124.76+-15.65	3.0+-0.0	2	232212	897112	76846.4	93917.5	124	DNJA2_HUMAN	2.34219e-05	9.82262e-05	9.25288e-05	0.00011296		0.743714	1.25629	0.591994
	TCPH_HUMAN	T-complex protein 1 subunit eta OS=Homo sapiens OX=9606 GN=CCT7 PE=1 SV=2	59842.1	682.77+-77.31	14.0+-0.63	4	6.78107e+06	8.40537e+06	1.2376e+06	1.03297e+06	682	TCPH_HUMAN	0.000683965	0.000920317	0.00149016	0.00124241		0.739838	1.26016	0.587097
	DD19A_HUMAN	ATP-dependent RNA helicase DDX19A OS=Homo sapiens OX=9606 GN=DDX19A PE=1 SV=1	54397	139.5+-45.35	2.5+-0.5	3	184937	1574838	101003	170268	139	DD19A_HUMAN	1.86535e-05	0.000172431	0.000121616	0.000204791		0.738505	1.2615	0.58542
	ERAL1_HUMAN	GTPase Era, mitochondrial OS=Homo sapiens OX=9606 GN=ERAL1 PE=1 SV=2	48832.7	266.15+-74.56	4.6+-1.2	4	822576	1.03999e+06	76016.2	204083	266	ERAL1_HUMAN	8.29683e-05	0.00011387	9.15293e-05	0.000245462		0.737458	1.26254	0.584105
	ATM_HUMAN	Serine-protein kinase ATM OS=Homo sapiens OX=9606 GN=ATM PE=1 SV=4	355537	1329.34+-196.35	29.8+-8.21	4	9.08628e+06	1.196e+07	1.62207e+06	1.5448e+06	132	ATM_HUMAN	0.000916478	0.00130952	0.0019531	0.00185801		0.737437	1.26256	0.58408
	CHD7_HUMAN	Chromodomain-helicase-DNA-binding protein 7 OS=Homo sapiens OX=9606 GN=CHD7 PE=1 SV=3	337542	914.12+-431.62	20.8+-9.66	4	1.3217e+07	1.10797e+07	1.42672e+06	2.19862e+06	914	CHD7_HUMAN	0.00133312	0.00121313	0.00171788	0.0026444		0.737132	1.26287	0.583697
	OAS3_HUMAN		0	41.51+-1.73	2.0+-0.0	2	598602	0	0	86195.4	41.	OAS3_HUMAN	6.03774e-05	0	0	0.000103672		0.736088	1.26391	0.582389
	UBP10_HUMAN	Ubiquitin carboxyl-terminal hydrolase 10 OS=Homo sapiens OX=9606 GN=USP10 PE=1 SV=2	87707	81.4+-0.0	3.0+-0.0	1	154372	126034	42093.1	0	81.	UBP10_HUMAN	1.55705e-05	1.37997e-05	5.06832e-05	0		0.733765	1.26623	0.579486
	MY15B_HUMAN	Unconventional myosin-XVB OS=Homo sapiens OX=9606 GN=MYO15B PE=1 SV=3	168066	608.33+-152.29	12.6+-2.58	4	3.95591e+06	1.92953e+06	374291	501228	608	MY15B_HUMAN	0.000399009	0.000211268	0.000450675	0.000602854		0.733591	1.26641	0.579269
	ALKB5_HUMAN	RNA demethylase ALKBH5 OS=Homo sapiens OX=9606 GN=ALKBH5 PE=1 SV=2	44570.7	275.62+-85.88	5.6+-2.33	4	1.29534e+06	3.32616e+06	376606	335802	275	ALKB5_HUMAN	0.000130653	0.000364186	0.000453462	0.000403888		0.731909	1.26809	0.577174
	ZC12D_HUMAN	Probable ribonuclease ZC3H12D OS=Homo sapiens OX=9606 GN=ZC3H12D PE=1 SV=3	58497.8	179.54+-10.35	3.8+-1.47	4	510826	521933	107968	48920.4	179	ZC12D_HUMAN	5.15239e-05	5.71473e-05	0.000130002	5.88393e-05		0.730532	1.26947	0.575463
	IF4A1_HUMAN	Eukaryotic initiation factor 4A-I OS=Homo sapiens OX=9606 GN=EIF4A1 PE=1 SV=1	46352.6	417.19+-88.82	7.8+-1.33	4	2.64688e+06	3075515	524768	348127	417	IF4A1_HUMAN	0.000266975	0.000336743	0.00063186	0.000418712		0.729882	1.27012	0.574657
	MACF1_HUMAN	Microtubule-actin cross-linking factor 1, isoforms 1/2/3/5 OS=Homo sapiens OX=9606 GN=MACF1 PE=1 SV=4	843033	132.51+-42.38	3.0+-1.22	3	587997	115051	94370.4	11668	132	MACF1_HUMAN	5.93077e-05	1.25972e-05	0.000113629	1.40338e-05		0.720606	1.27939	0.563241
	PKP3_HUMAN	Plakophilin-3 OS=Homo sapiens OX=9606 GN=PKP3 PE=1 SV=1	87485.2	680.56+-118.29	15.4+-3.72	4	6.85224e+06	4.98125e+06	966735	859384	680	PKP3_HUMAN	0.000691144	0.000545405	0.00116402	0.00103363		0.720138	1.27986	0.562669
	SMAD1_HUMAN	Mothers against decapentaplegic homolog 1 OS=Homo sapiens OX=9606 GN=SMAD1 PE=1 SV=1	53024.8	90.5+-9.3	2.0+-0.0	2	0	1.30418e+06	101640	109872	90.	SMAD1_HUMAN	0	0.000142796	0.000122382	0.00013215		0.718784	1.28122	0.561017
	GLYC_HUMAN	Serine hydroxymethyltransferase, cytosolic OS=Homo sapiens OX=9606 GN=SHMT1 PE=1 SV=1	53619.2	388.2+-23.41	7.0+-0.0	2	3183678	2990719	389742	571944	388	GLYC_HUMAN	0.000321118	0.000327458	0.000469279	0.000687908		0.718341	1.28166	0.560477
	NPRL3_HUMAN	GATOR complex protein NPRL3 OS=Homo sapiens OX=9606 GN=NPRL3 PE=1 SV=1	64134.9	67.49+-2.22	2.0+-0.0	2	490139	371788	76815	57072	67.	NPRL3_HUMAN	4.94374e-05	4.07076e-05	9.2491e-05	6.86436e-05		0.717488	1.28251	0.559439
	KDM3B_HUMAN	Lysine-specific demethylase 3B OS=Homo sapiens OX=9606 GN=KDM3B PE=1 SV=2	193172	567.99+-207.24	11.0+-4.15	4	3466429	2.92778e+06	437681	565794	567	KDM3B_HUMAN	0.000349638	0.000320567	0.000527	0.000680511		0.713851	1.28615	0.55503
	RTF2_HUMAN	Replication termination factor 2 OS=Homo sapiens OX=9606 GN=RTF2 PE=1 SV=3	34549.4	330.49+-18.42	7.8+-0.4	4	1.99737e+06	3.544e+06	460604	422919	330	RTF2_HUMAN	0.000201463	0.000388038	0.000554602	0.000508668		0.713349	1.28665	0.554423
	TBA4A_HUMAN	Tubulin alpha-4A chain OS=Homo sapiens OX=9606 GN=TUBA4A PE=1 SV=1	50633.7	784.47+-84.84	30.8+-6.68	4	1.65992e+08	9.41707e+07	2.55123e+07	1.50628e+07	784	TBA4A_HUMAN	0.0167426	0.0103109	0.0307187	0.0181168		0.712976	1.28702	0.553972
	LRC47_HUMAN	Leucine-rich repeat-containing protein 47 OS=Homo sapiens OX=9606 GN=LRRC47 PE=1 SV=1	64003.9	351.44+-93.92	7.6+-2.06	4	2.96606e+06	1.46358e+06	257151	435187	351	LRC47_HUMAN	0.000299169	0.00016025	0.000309629	0.000523424		0.710915	1.28909	0.551488
	KIF2C_HUMAN	Kinesin-like protein KIF2C OS=Homo sapiens OX=9606 GN=KIF2C PE=1 SV=2	82173.6	857.76+-100.09	17.2+-1.6	4	9.34566e+06	1.02065e+07	1.40685e+06	1.69811e+06	857	KIF2C_HUMAN	0.00094264	0.00111753	0.00169395	0.00204241		0.710828	1.28917	0.551384
	RL28_HUMAN	60S ribosomal protein L28 OS=Homo sapiens OX=9606 GN=RPL28 PE=1 SV=3	15794.7	89.25+-29.35	3.8+-0.75	4	3105345	1.49939e+06	437199	285711	89.	RL28_HUMAN	0.000313217	0.00016417	0.00052642	0.00034364		0.708581	1.29142	0.548684
	TBB3_HUMAN	Tubulin beta-3 chain OS=Homo sapiens OX=9606 GN=TUBB3 PE=1 SV=2	50856.4	1000.67+-81.78	36.4+-3.2	4	1.00127e+08	9.35855e+07	1.66954e+07	1.41258e+07	100	TBB3_HUMAN	0.0100992	0.0102468	0.0201026	0.0169898		0.708447	1.29155	0.548524
	PKN3_HUMAN	Serine/threonine-protein kinase N3 OS=Homo sapiens OX=9606 GN=PKN3 PE=1 SV=1	100441	830.98+-174.77	17.0+-3.35	4	1.08231e+07	7.85369e+06	1.18999e+06	1.77325e+06	830	PKN3_HUMAN	0.00109166	0.000859913	0.00143283	0.00213279		0.70745	1.29255	0.547329
	NFIB_HUMAN	Nuclear factor 1 B-type OS=Homo sapiens OX=9606 GN=NFIB PE=1 SV=2	47754.1	241.11+-53.13	6.0+-1.9	4	3.76737e+06	2218110	505306	445857	241	NFIB_HUMAN	0.000379992	0.000242864	0.000608426	0.000536257		0.704772	1.29523	0.54413
	AAPK1_HUMAN	5'-AMP-activated protein kinase catalytic subunit alpha-1 OS=Homo sapiens OX=9606 GN=PRKAA1 PE=1 SV=4	64595.8	506.96+-121.51	11.4+-1.85	4	4.69088e+06	4.20486e+06	649054	779853	506	AAPK1_HUMAN	0.000473141	0.000460397	0.000781509	0.000937972		0.703755	1.29625	0.542918
	RS14_HUMAN	40S ribosomal protein S14 OS=Homo sapiens OX=9606 GN=RPS14 PE=1 SV=3	16433.6	226.82+-29.31	5.6+-0.8	4	2.86662e+06	3.79909e+06	536772	550420	226	RS14_HUMAN	0.000289138	0.000415968	0.000646314	0.00066202		0.700399	1.2996	0.538934
	HDC_HUMAN	Headcase protein homolog OS=Homo sapiens OX=9606 GN=HECA PE=1 SV=1	60281.2	128.67+-13.64	2.7+-0.47	2	199856	468354	41625.1	68884.1	128	HDC_HUMAN	2.01582e-05	5.12808e-05	5.01197e-05	8.28507e-05		0.69898	1.30102	0.537255
	NOSIP_HUMAN	Nitric oxide synthase-interacting protein OS=Homo sapiens OX=9606 GN=NOSIP PE=1 SV=1	33664.2	334.75+-64.91	9.2+-2.04	4	6.33938e+06	7.51473e+06	1.01372e+06	1.2487e+06	334	NOSIP_HUMAN	0.000639415	0.000822799	0.00122059	0.00150188		0.69884	1.30116	0.53709
	HXK2_HUMAN	Hexokinase-2 OS=Homo sapiens OX=9606 GN=HK2 PE=1 SV=2	103739	66.78+-0.71	2.0+-0.0	2	402711	308098	61958.2	54111.3	66.	HXK2_HUMAN	4.0619e-05	3.37341e-05	7.46023e-05	6.50826e-05		0.694766	1.30523	0.532292
	HELLS_HUMAN	Lymphoid-specific helicase OS=Homo sapiens OX=9606 GN=HELLS PE=1 SV=1	97639.4	622.32+-133.64	13.2+-0.98	4	4.87003e+06	5.12946e+06	956517	700156	622	HELLS_HUMAN	0.00049121	0.000561633	0.00115172	0.000842117		0.691142	1.30886	0.528049
	RL18A_HUMAN	60S ribosomal protein L18a OS=Homo sapiens OX=9606 GN=RPL18A PE=1 SV=2	21034	109.81+-12.3	2.3+-0.43	3	1.24297e+06	85799.9	91433.5	123450	109	RL18A_HUMAN	0.000125371	9.39436e-06	0.000110093	0.00014848		0.685238	1.31476	0.521188
	CHD2_HUMAN	Chromodomain-helicase-DNA-binding protein 2 OS=Homo sapiens OX=9606 GN=CHD2 PE=1 SV=2	212183	932.01+-246.45	21.0+-6.51	4	5.3778e+06	4.33999e+06	851672	775211	932	CHD2_HUMAN	0.000542426	0.000475193	0.00102548	0.000932389		0.684002	1.316	0.519759
	GCP3_HUMAN	Gamma-tubulin complex component 3 OS=Homo sapiens OX=9606 GN=TUBGCP3 PE=1 SV=2	104304	376.92+-136.02	7.0+-2.76	4	912047	1.72941e+06	201705	250307	376	GCP3_HUMAN	9.19927e-05	0.000189355	0.000242867	0.000301059		0.681829	1.31817	0.517254
	OSBL7_HUMAN	Oxysterol-binding protein-related protein 7 OS=Homo sapiens OX=9606 GN=OSBPL7 PE=1 SV=1	96398.1	75.57+-13.83	2.0+-0.0	2	356047	466362	78617.1	61715.4	75.	OSBL7_HUMAN	3.59123e-05	5.10627e-05	9.46609e-05	7.42285e-05		0.679852	1.32015	0.514982
	HDAC7_HUMAN	Histone deacetylase 7 OS=Homo sapiens OX=9606 GN=HDAC7 PE=1 SV=2	103604	51.14+-4.93	2.0+-0.0	3	986975	675072	214924	65869.8	51.	HDAC7_HUMAN	9.95502e-05	7.39147e-05	0.000258785	7.92252e-05		0.678293	1.32171	0.513195
	TRM2A_HUMAN	tRNA (uracil-5-)-methyltransferase homolog A OS=Homo sapiens OX=9606 GN=TRMT2A PE=1 SV=2	69708.6	80.58+-9.62	2.0+-0.0	3	475693	468097	85691.1	76379	80.	TRM2A_HUMAN	4.79803e-05	5.12527e-05	0.000103178	9.18653e-05		0.67442	1.32558	0.508773
	ABCF1_HUMAN	ATP-binding cassette sub-family F member 1 OS=Homo sapiens OX=9606 GN=ABCF1 PE=1 SV=2	96322.6	921.09+-82.85	21.2+-1.17	4	9.80971e+06	9.28072e+06	1.64337e+06	1.64357e+06	921	ABCF1_HUMAN	0.000989446	0.00101616	0.00197874	0.00197681		0.672892	1.32711	0.507037
	VP33B_HUMAN	Vacuolar protein sorting-associated protein 33B OS=Homo sapiens OX=9606 GN=VPS33B PE=1 SV=2	71224.6	110.44+-12.31	2.6+-0.49	4	669656	514941	96394.9	110016	110	VP33B_HUMAN	6.75441e-05	5.63817e-05	0.000116067	0.000132322		0.665705	1.3343	0.498919
	ELF2_HUMAN	ETS-related transcription factor Elf-2 OS=Homo sapiens OX=9606 GN=ELF2 PE=1 SV=2	64382.9	510.74+-65.7	7.2+-0.75	4	951187	2.09281e+06	236748	305712	510	ELF2_HUMAN	9.59405e-05	0.000229145	0.000285063	0.000367697		0.664901	1.3351	0.498017
	SELB_HUMAN	Selenocysteine-specific elongation factor OS=Homo sapiens OX=9606 GN=EEFSEC PE=1 SV=4	65890.3	460.23+-58.91	8.6+-1.2	4	2.74091e+06	2.96094e+06	462605	540880	460	SELB_HUMAN	0.000276459	0.000324198	0.000557012	0.000650546		0.664365	1.33564	0.497415
	SPB1_HUMAN	pre-rRNA 2'-O-ribose RNA methyltransferase FTSJ3 OS=Homo sapiens OX=9606 GN=FTSJ3 PE=1 SV=2	96898.3	443.39+-88.84	8.6+-1.02	4	2301527	3.72391e+06	498731	573186	443	SPB1_HUMAN	0.000232141	0.000407737	0.00060051	0.000689402		0.663158	1.33684	0.496063
	AMOL2_HUMAN	Angiomotin-like protein 2 OS=Homo sapiens OX=9606 GN=AMOTL2 PE=1 SV=3	85940.6	46.92+-0.0	2.0+-0.0	1	532130	1.09317e+06	126059	164804	46.	AMOL2_HUMAN	5.36727e-05	0.000119693	0.000151784	0.000198218		0.662501	1.3375	0.495328
	EHD1_HUMAN	EH domain-containing protein 1 OS=Homo sapiens OX=9606 GN=EHD1 PE=1 SV=2	60645.7	178.75+-56.79	4.0+-1.67	4	1.06332e+06	1320540	225606	201513	178	EHD1_HUMAN	0.000107251	0.000144588	0.000271647	0.000242371		0.657666	1.34233	0.489942
	ANKH1_HUMAN	Ankyrin repeat and KH domain-containing protein 1 OS=Homo sapiens OX=9606 GN=ANKHD1 PE=1 SV=1	271286	160.27+-47.03	2.8+-0.43	3	87809.4	365922	62086	21245.1	160	ANKH1_HUMAN	8.8568e-06	4.00654e-05	7.47562e-05	2.55527e-05		0.655657	1.34434	0.487715
[truncated: 628 more rows]

## Sheet: ICP22pulldown_REPLICATE2
Supplementary Table 1: List of proteins interacting with ICP22CCR identified by mass spectrometry (Replicate 2). The IpgC which does not bind to P-TEFb was used as comparison.
[truncated: 2,292 more rows]
