# Supplementary material for: HSV-1 ICP22 Is a Selective Viral Repressor of Cellular RNA Polymerase II-Mediated Transcription Elongation
Source: Vaccines (Basel). 2021 Sep 22;9(10):1054. doi: 10.3390/vaccines9101054 (PMC8539892; doi:10.3390/vaccines9101054)
Supplement: Supplementary file 1 [file vaccines-09-01054-s001.zip › Supplementary Table S2_QList of proteins interacting with ICP22CCR categorised by gene ontology (GO).xlsx]

## Sheet: Table 2 supp_QMUL_enrichment_
Supplementary Table S2: List of proteins interacting with ICP22CCR categorised by gene ontology (GO).
geneSet	description	link	size	overlap	expect	enrichmentRatio	pValue	FDR	overlapId	userId
GO:0006397	mRNA processing	http://amigo.geneontology.org/amigo/term/GO:0006397	487	57	15.5569	3.66397	0	0	891;902;904;988;1025;1477;1479;2071;2332;2926;4154;4928;5356;5936;6421;6936;7936;8189;8621;9646;9667;9984;10084;10992;11052;11168;11171;11218;22828;23028;23064;23070;23450;23451;23517;29894;51163;51319;51585;51692;51729;51755;53981;54439;54623;55339;55677;55696;55749;57703;57794;57805;58517;64062;64783;79577;79869	CCNH;PAF1;CDK9;NELFE;CCNT1;CDC73;CDK13;CDK12;GCFC2;THOC1;RSRC1;DDX20;MBNL1;RBM4;SYMPK;WBP11;IWS1;CWC22;CSTF3;CTR9;FMR1;ERCC3;KDM1A;SUGP1;MTREX;SCAF8;PSIP1;RBM22;CCAR2;SF3B3;WDR33;SF3B1;PLRG1;GRSF1;CCAR1;SETX;CSTF1;CCNB1;SAFB2;CPSF3;CPSF1;CDC5L;PCF11;CPSF2;RBM25;RBM27;DBR1;PQBP1;RBM15;CMTR1;NUP98;SF3B2;CPSF6;STRAP;RBM26;CPSF7;SFPQ
GO:0044772	mitotic cell cycle phase transition	http://amigo.geneontology.org/amigo/term/GO:0044772	487	59	15.5569	3.79253	0	0	641;699;701;891;983;991;1069;1874;2033;2059;2071;2146;2956;3161;4361;4751;4998;4999;5356;5885;6117;6118;6683;6790;6881;7023;7027;7272;7465;7508;8452;8697;9024;9133;9344;9700;10403;10498;22974;23354;23476;23595;25942;29117;51347;51512;54801;54820;56257;57504;57551;79577;79733;79915;81620;84515;84962;93323;121441	CDC73;MEPCE;CUL3;NEK2;RPA2;BUB1;BRD7;CETN2;EPS8;E2F4;EZH2;CCNB2;RPA1;TAOK2;HAUS5;BUB1B;ATAD5;TFDP1;EP300;ERCC3;HAUS6;ESPL1;SIN3A;BRSK2;MTA3;TAF10;MRE11;E2F8;NEDD1;XPC;NDC80;HAUS8;CARM1;NDE1;GTSE1;PLRG1;TAOK1;CCNB1;RAD21;TFAP4;AJUBA;WEE1;CDC23;BRD4;CDC20;CDT1;SPAST;ORC1;MCM8;TAOK3;HMMR;BLM;TTK;MSH6;CDK1;ORC3;ORC2;AURKA;TPX2
GO:0016569	covalent chromatin modification	http://amigo.geneontology.org/amigo/term/GO:0016569	468	64	14.95	4.28095	0	0	546;891;983;1025;1386;1487;1786;2033;2146;2332;3662;4297;6015;6421;6497;6790;6880;6881;7468;7936;8202;8295;8932;9219;9646;9759;10445;10474;10498;10664;10847;10902;10919;11177;22992;23028;23030;23186;23476;23512;25836;25942;29072;29117;30827;54623;54904;55100;55140;55183;55677;55870;55929;56943;57504;57634;58508;79577;79813;80335;84148;84864;151636;339287	PAF1;CDK9;NELFE;CDC73;ATRX;KMT2A;NCOA3;BRD7;EZH2;BRD8;SRCAP;CTCF;TAF9;HDAC4;KMT2C;MBD2;IWS1;TADA3;CTBP1;CTR9;EP300;FMR1;NSD2;KDM1A;ASH1L;ATF2;EP400;SIN3A;MCRS1;MTA3;TAF10;SETD2;SKI;RCOR1;EHMT2;ENY2;CARM1;DMAP1;CXXC1;EHMT1;SUZ12;MSL1;RIOX2;KDM4B;CCNB1;NSD3;ELP3;BRD4;KAT8;RING1;WDR70;WDR82;TRRAP;MTA2;BAZ1A;NIPBL;RIF1;KDM2A;DTX3L;IRF4;CDK1;DNMT1;AURKA;SFPQ
GO:1901987	regulation of cell cycle phase transition	http://amigo.geneontology.org/amigo/term/GO:1901987	386	50	12.3305	4.05498	0	0	641;699;701;891;983;991;1069;1874;2033;2071;2146;2956;3161;4361;4751;4998;5356;5885;6118;6790;7023;7027;7272;7465;7508;8452;8697;9344;9700;10403;10498;22974;23354;23476;25942;29117;51347;51512;54623;54801;54820;56257;57504;57551;79577;79733;79915;81620;93323;121441	PAF1;CDC73;MEPCE;CUL3;NEK2;RPA2;BUB1;BRD7;CETN2;E2F4;EZH2;TAOK2;HAUS5;BUB1B;ATAD5;TFDP1;EP300;ERCC3;HAUS6;ESPL1;SIN3A;MTA3;MRE11;E2F8;NEDD1;XPC;NDC80;HAUS8;CARM1;NDE1;GTSE1;PLRG1;TAOK1;CCNB1;RAD21;TFAP4;WEE1;CDC23;BRD4;CDC20;CDT1;ORC1;TAOK3;HMMR;BLM;TTK;MSH6;CDK1;AURKA;TPX2
GO:0006354	DNA-templated transcription, elongation	http://amigo.geneontology.org/amigo/term/GO:0006354	98	26	3.13055	8.30526	0	0	902;904;905;1025;2071;2074;2146;6749;6921;6923;7936;8621;8812;9646;9984;23476;25920;27125;29072;51755;54623;55140;55677;56943;57805;79577	CCNH;PAF1;CDK9;NELFE;CCNT2;CCNT1;CCNK;CDC73;CDK13;CDK12;THOC1;EZH2;IWS1;CTR9;ERCC3;NELFB;SETD2;ENY2;CCAR2;SSRP1;ELP3;ELOC;AFF4;BRD4;ERCC6;ELOB
GO:0010948	negative regulation of cell cycle process	http://amigo.geneontology.org/amigo/term/GO:0010948	278	41	8.88053	4.61684	2.22e-16	3.15e-14	546;641;699;701;891;983;991;1025;1874;2033;2146;2956;4361;4751;4998;5885;6015;6118;6790;7014;7023;7027;7272;7465;8812;9344;9700;10403;10498;10735;10919;23063;23512;29117;51347;51512;57551;79577;79733;79813;81620	CDK9;CCNK;CDC73;ATRX;NEK2;RPA2;BUB1;BRD7;E2F4;EZH2;STAG2;TERF2;TAOK2;BUB1B;TFDP1;EP300;ESPL1;MRE11;E2F8;EHMT2;NDC80;CARM1;EHMT1;WAPL;SUZ12;GTSE1;TAOK1;CCNB1;RAD21;TFAP4;WEE1;RING1;CDC20;CDT1;ORC1;TAOK3;BLM;TTK;MSH6;CDK1;AURKA
GO:0007059	chromosome segregation	http://amigo.geneontology.org/amigo/term/GO:0007059	312	43	9.96664	4.31439	4.44e-16	5.39e-14	546;641;699;701;891;991;4292;4361;4751;5885;6421;7272;8452;8697;8780;8940;9055;9698;9700;10403;10664;10735;11011;23047;23063;23126;23137;23244;24137;25836;54820;55165;56852;64793;79677;79980;81620;83540;84464;114799;220134;221150;285643	CUL3;ATRX;NEK2;CEP85;BUB1;DSN1;RIOK3;STAG2;CTCF;KIF4B;BUB1B;CEP55;ESPL1;NUF2;MRE11;NDC80;SLX4;NDE1;WAPL;PUM1;RAD18;CCNB1;RAD21;POGZ;CDC23;MLH1;ESCO1;TOP3B;SKA1;CDC20;CDT1;TLK2;PDS5B;PDS5A;NIPBL;SMC5;SMC6;BLM;TTK;SKA3;KIF4A;PRC1;SFPQ
GO:0033044	regulation of chromosome organization	http://amigo.geneontology.org/amigo/term/GO:0033044	329	44	10.5097	4.18661	5.55e-16	5.9e-14	546;699;701;891;991;1025;1487;1786;2332;4297;4361;4751;5885;6421;6497;7014;7272;7936;8452;8697;9646;9700;9874;10403;10474;10664;11011;11284;23028;23049;23063;23137;23476;25836;25942;29117;51750;54623;54904;55100;55183;55677;81620;84464	PAF1;CDK9;NELFE;CUL3;ATRX;KMT2A;NEK2;BUB1;BRD7;SMG1;CTCF;TERF2;PNKP;IWS1;BUB1B;TADA3;CTBP1;CTR9;FMR1;KDM1A;ESPL1;SIN3A;MRE11;SKI;NDC80;SLX4;RTEL1;WAPL;CCNB1;RAD21;NSD3;CDC23;BRD4;WDR70;CDC20;CDT1;TLK2;NIPBL;RIF1;SMC5;TTK;TLK1;DNMT1;SFPQ
GO:0006260	DNA replication	http://amigo.geneontology.org/amigo/term/GO:0006260	268	38	8.56109	4.43869	8.99e-15	8.49e-13	466;546;641;983;1025;2956;4361;4437;4782;4928;4998;4999;6117;6118;6749;7014;9984;10735;10919;11177;11284;23054;23063;23244;23595;25942;51750;57418;58525;79733;79915;81620;84126;84464;84515;114799;222229;254394	CDK9;NCOA6;ATRX;RPA2;THOC1;STAG2;ATF1;RPA1;TERF2;PNKP;ATAD5;SIN3A;ATRIP;MRE11;E2F8;EHMT2;SLX4;RTEL1;WAPL;SSRP1;MSH3;WDR18;ESCO1;CDT1;ORC1;MCM8;PDS5A;BAZ1A;WIZ;BLM;MCM9;NFIC;NUP98;MSH6;LRWD1;CDK1;ORC3;ORC2
GO:0043631	RNA polyadenylation	http://amigo.geneontology.org/amigo/term/GO:0043631	48	17	1.53333	11.087	4.82e-14	4.1e-12	904;1025;1479;2926;7936;8189;9646;11052;22828;29894;51585;51692;53981;54623;55339;79577;79869	PAF1;CDK9;NELFE;CCNT1;CDC73;SYMPK;CSTF3;CTR9;SCAF8;WDR33;GRSF1;CPSF3;CPSF1;PCF11;CPSF2;CPSF6;CPSF7
