# Supplementary material for: HSV-1 ICP22 Is a Selective Viral Repressor of Cellular RNA Polymerase II-Mediated Transcription Elongation
Source: Vaccines (Basel). 2021 Sep 22;9(10):1054. doi: 10.3390/vaccines9101054 (PMC8539892; doi:10.3390/vaccines9101054)
Supplement: Supplementary file 1 [file vaccines-09-01054-s001.zip › Supplementary Table S3_Peptides of modified ICP22 detected by mass spectrometry.xlsx]

## Sheet: peptides ICP22
Supplementary Table S3: Peptides of modified ICP22 detected by mass spectrometry.
Peptides ICP22 (P04485):
												Replicate 1 (R1)			Replicate 2 (R2)
Sequence	Proteins	Leading razor protein	Start position	End position	Gene names	Protein names	Unique (Groups)	Unique (Proteins)	Charges	PEP	Score	Intensity 190522_Untreat_R1	Intensity 190522_UV_minus_R1	Intensity 190522_UV_plus_R1	Intensity 190522_Untreat_R2	Intensity 190522_UV_minus_R2	Intensity 190522_UV_plus_R2	Reverse	Potential contaminant
ADISPGAFAPCVK	P04485	P04485	2	14			yes	yes	2	5.1148e-05	70.1	0	0	207340000	0	0	78608000
SPPLGTR	P04485	P04485	22	28			yes	yes	2	0.032633	71.715	0	0	88359000	0	0	0
RDGVIFPK	P04485	P04485	139	146			yes	yes	2	0.037675	70.69	0	0	6768200	0	0	0
DGVIFPK	P04485	P04485	140	146			yes	yes	1	0.034456	52.683	0	0	0	0	0	0
DGVIFPKMGR	P04485	P04485	140	149			yes	yes	3	0.024677	28.204	0	0	4949800	0	0	3719100
APTPSAPSPNAMLR	P04485	P04485	160	173			yes	yes	2;3	2.4055e-91	155.06	6018600	100400000	839310000	0	166330000	2417100000
APTPSAPSPNAMLRR	P04485	P04485	160	174			yes	yes	3	1.0387e-09	67.234	0	0	0	0	0	0
WTPDLGYMR	P04485	P04485	187	195			yes	yes	2	1.3742e-43	154.01	0	20880000	1154400000	0	0	547950000
QCINQLFR	P04485	P04485	196	203			yes	yes	2;3	3.2141e-30	158.53	5424400	46188000	2456400000	0	18488000	419470000
DCYLMGYCR	P04485	P04485	224	232			yes	yes	2	1.5266e-09	119.89	0	0	0	0	0	0
FDATAEPVCK	P04485	P04485	266	275			yes	yes	2;3	7.9483e-13	124.23	11174000	122620000	4370200000	0	84592000	2342000000
LEDEFGEFDWTPQEGSQPWLSAVVADTSSVERPGPSDSGAGR	P04485	P04485	348	389			yes	yes	4	5.8842e-87	113.38	0	0	48289000	0	0	0
FSTACPYPCSDTFLR	P04485	P04485	405	419			yes	yes	2;3	2.3687e-78	155.48	0	0	53867000	0	0	38153000
FSTACPYPCSDTFLRP	P04485	P04485	405	420			yes	yes	2;3	3.0548e-53	182.35	0	53852000	2762000000	0	4169000	489380000
Modified ICP22 (P04485) peptide search:
																				Replicate 1 (R1)			Replicate 2 (R2)
Sequence	Modifications	Proteins	Gene Names	Protein Names	Unique (Groups)	Unique (Proteins)	Acetyl (Protein N-term)	Oxidation (M)	Tyr->BPA	Missed cleavages	Retention time	Calibrated retention time	Charges	PEP	MS/MS scan number	Raw file	Score	Delta score	Intensity	Intensity 190522_Untreat_R1	Intensity 190522_UV_minus_R1	Intensity 190522_UV_plus_R1	Intensity 190522_Untreat_R2	Intensity 190522_UV_minus_R2	Intensity 190522_UV_plus_R2	Reverse	Potential contaminant	id	Protein group IDs	Peptide ID	Evidence IDs	MS/MS IDs	Best MS/MS	Oxidation (M) site IDs	Tyr->BPA site IDs	MS/MS Count
ADISPGAFAPCVK	Acetyl (Protein N-term)	P04485			yes	yes	1	0	0	0	62.022	62.022	2	5.1148e-05	19557	Qex01_SL_190430_FirdausIsa_UV_plus_016	70.1	58.252	408050000	0	0	207340000	0	0	78608000			33	85	33	74;75;76;77	77;78;79;80	77			4
APTPSAPSPNAMLR	Oxidation (M)	P04485			yes	yes	0	1	0	0	36.385	36.385	2;3	6.0749e-10	9239	Qex01_SL_190522_FirdausIsa_UV_plus_Met_007	102.53	83.751	4931700000	0	0	641920000	0	0	505490000			157	85	154	456;457;458;459;460;461;462;463;464;465;466;467;468;469;470;471;472;473;474;475	528;529;530;531;532;533;534;535;536;537;538;539;540;541;542;543;544;545;546;547;548;549;550;551;552;553;554;555;556;557	539	43		27
APTPSAPSPNAMLR	Unmodified	P04485			yes	yes	0	0	0	0	42.909	42.909	2;3	2.4055e-91	12321	Qex01_SL_190522_FirdausIsa_UV_plus_Met_007	142.83	114.43	9681500000	6018600	100400000	197390000	0	166330000	1911700000			158	85	154	476;477;478;479;480;481;482;483;484;485;486;487;488;489;490;491;492;493;494;495;496;497	558;559;560;561;562;563;564;565;566;567;568;569;570;571;572;573;574;575;576;577;578;579;580;581;582;583;584;585;586;587;588;589;590;591;592;593;594	581			37
APTPSAPSPNAMLRR	Unmodified	P04485			yes	yes	0	0	0	1	38.444	38.444	3	1.0387e-09	10977	Qex01_SL_190430_FirdausIsa_UV_minus_014	67.234	55.069	314520000	0	0	0	0	0	0			159	85	155	498;499;500	595;596;597	595			3
DCYLMGYCR	Oxidation (M);Tyr->BPA	P04485			yes	yes	0	1	1	0	62.132	62.132	2	0.00023015	19181	Qex01_SL_190522_FirdausIsa_UV_plus_Met_007	105.39	95.803	116560000	0	6730000	71089000	0	0	0			251	85	244	848;849;850;851;852	1039;1040;1041;1042;1043;1044;1045;1046	1043	44	0	8
DCYLMGYCR	Tyr->BPA	P04485			yes	yes	0	0	1	0	70.284	70.284	2	1.5266e-09	22123	Qex01_SL_190522_FirdausIsa_UV_plus_Met_007	119.89	106.83	37014000	0	1018800	34661000	0	0	0			252	85	244	853;854;855	1047;1048;1049	1048		0	3
DGVIFPK	Unmodified	P04485			yes	yes	0	0	0	0	44.182	44.182	1	0.034456	13385	Qex01_SL_190604_FirdausIsa_UV_plus_Met_007	41.502	16.504	414010000	0	0	0	0	0	0			260	85	252	884;885	1080;1081	1081			1
DGVIFPKMGR	Unmodified	P04485			yes	yes	0	0	0	1	47.387	47.387	3	0.024677	13689	Qex01_SL_190522_FirdausIsa_UV_plus_Silver_013	28.204	12.944	8668900	0	0	4949800	0	0	3719100			261	85	253	886;887	1082;1083	1083			2
FDATAEPVCK	Unmodified	P04485			yes	yes	0	0	0	0	32.314	32.314	2;3	7.9483e-13	6981	Qex01_SL_190604_FirdausIsa_UV_minus_Met_005	124.23	78.512	13148000000	11174000	122620000	4370200000	0	84592000	2342000000			533	85	515	1846;1847;1848;1849;1850;1851;1852;1853;1854;1855;1856;1857;1858;1859;1860;1861;1862;1863;1864	2222;2223;2224;2225;2226;2227;2228;2229;2230;2231;2232;2233;2234;2235;2236;2237;2238;2239;2240;2241;2242;2243;2244;2245;2246;2247;2248;2249;2250;2251;2252;2253;2254;2255;2256;2257;2258;2259;2260;2261;2262;2263;2264;2265;2266;2267;2268	2260			44
FSTACPYPCSDTFLR	Unmodified	P04485			yes	yes	0	0	0	0	55.333	55.333	2;3	2.3687e-78	16536	Qex01_SL_190522_FirdausIsa_UV_plus_Silver_013	155.48	145.11	168890000	0	0	53867000	0	0	38153000			600	85	581	2220;2221;2222;2223;2224;2225	2876;2877;2878;2879;2880;2881	2879			6
FSTACPYPCSDTFLRP	Unmodified	P04485			yes	yes	0	0	0	1	59.488	59.488	2;3	3.0548e-53	18508	Qex01_SL_190430_FirdausIsa_UV_plus_016	182.35	168.92	5324600000	0	53852000	2762000000	0	4169000	489380000			601	85	582	2226;2227;2228;2229;2230;2231;2232;2233;2234;2235;2236;2237;2238;2239;2240	2882;2883;2884;2885;2886;2887;2888;2889;2890;2891;2892;2893;2894;2895;2896;2897;2898;2899;2900;2901;2902	2887			21
LEDEFGEFDWTPQEGSQPWLSAVVADTSSVERPGPSDSGAGR	Unmodified	P04485			yes	yes	0	0	0	1	74.94	74.94	4	5.8842e-87	22986	Qex01_SL_190522_FirdausIsa_UV_plus_Met_007	113.38	107.36	296390000	0	0	48289000	0	0	0			1056	85	1027	4426;4427	5827;5828	5827			2
QCINQLFR	Unmodified	P04485			yes	yes	0	0	0	0	52.237	52.237	2;3	3.2141e-30	14620	Qex01_SL_190430_FirdausIsa_UV_plus_016	158.53	130.11	5107400000	5424400	46188000	2456400000	0	18488000	419470000			1514	85	1454	6601;6602;6603;6604;6605;6606;6607;6608;6609;6610;6611;6612;6613;6614;6615	8880;8881;8882;8883;8884;8885;8886;8887;8888;8889;8890;8891;8892;8893;8894;8895;8896;8897;8898;8899;8900;8901;8902;8903;8904;8905;8906;8907;8908;8909;8910;8911;8912;8913	8882			33
RDGVIFPK	Unmodified	P04485			yes	yes	0	0	0	1	36.124	36.124	2	0.037675	9882	Qex01_SL_190522_FirdausIsa_UV_plus_Met_007	70.69	57.702	6768200	0	0	6768200	0	0	0			1632	85	1568	7049	9441	9441			1
SPPLGTR	Unmodified	P04485			yes	yes	0	0	0	0	23.441	23.441	2	0.032633	6033	Qex01_SL_190430_FirdausIsa_UV_minus_014	70.912	18.229	104900000	0	0	88359000	0	0	0			1787	85	1721	8141;8142	10983;10984	10983			2
WTPDLGYMR	Unmodified	P04485			yes	yes	0	0	0	0	55.38	55.38	2	1.3742e-43	16534	Qex01_SL_190522_FirdausIsa_UV_plus_Met_007	154.01	83.745	2742800000	0	20880000	1154400000	0	0	547950000			2241	85	2153	9862;9863;9864;9865;9866;9867;9868;9869	13291;13292;13293;13294;13295;13296;13297;13298;13299;13300;13301;13302;13303;13304;13305;13306;13307;13308	13297			18
