# Supplementary material for: HSV-1 ICP22 Is a Selective Viral Repressor of Cellular RNA Polymerase II-Mediated Transcription Elongation
Source: Vaccines (Basel). 2021 Sep 22;9(10):1054. doi: 10.3390/vaccines9101054 (PMC8539892; doi:10.3390/vaccines9101054)
Supplement: Supplementary file 1 [file vaccines-09-01054-s001.zip › Supplementary Table S4_List of crosslinked proteins from excised gel-piece (_250kDa) identified by mass spectrometry.xlsx]

## Sheet: Replicate 1and2-proteinGroups 
Supplementary Table S4: List of crosslinked proteins from excised gel-piece (>250kDa) identified by mass spectrometry.
							Replicate 1 (R1)									Replicate 2 (R2)
Protein IDs	Majority protein IDs	Protein names	Gene names	Fasta headers	Mol. weight [kDa]	Sequence length	Peptides 190522_Untreat_R1	Peptides 190522_UV_minus_R1	Peptides 190522_UV_plus_R1	Sequence coverage 190522_Untreat_R1 [%]	Sequence coverage 190522_UV_minus_R1 [%]	Sequence coverage 190522_UV_plus_R1 [%]	Intensity 190522_Untreat_R1	Intensity 190522_UV_minus_R1	Intensity 190522_UV_plus_R1	Peptides 190522_Untreat_R2	Peptides 190522_UV_minus_R2	Peptides 190522_UV_plus_R2	Sequence coverage 190522_Untreat_R2 [%]	Sequence coverage 190522_UV_minus_R2 [%]	Sequence coverage 190522_UV_plus_R2 [%]	Intensity 190522_Untreat_R2	Intensity 190522_UV_minus_R2	Intensity 190522_UV_plus_R2	Intensity	Only identified by site	Reverse	Potential contaminant	id	Peptide IDs	Peptide is razor	Mod. peptide IDs	Evidence IDs	MS/MS IDs	Best MS/MS	Oxidation (M) site IDs	Tyr->BPA site IDs	Oxidation (M) site positions	Tyr->BPA site positions
P04485	P04485			sp|P04485|ICP22_HHV11 Transcriptional regulator ICP22 OS=Human herpesvirus 1 (strain 17) OX=10299 GN=ICP22 PE=1 SV=1	46.524	420	3	6	12	7.6	15.7	33.1	22617000	343940000	11992000000	0	4	8	0	11.4	19	0	273580000	6336500000	42658000000				85	33;154;155;244;252;253;515;581;582;1027;1454;1568;1721;2153	True;True;True;True;True;True;True;True;True;True;True;True;True;True	33;157;158;159;251;252;260;261;533;600;601;1056;1514;1632;1787;2241	74;75;76;77;456;457;458;459;460;461;462;463;464;465;466;467;468;469;470;471;472;473;474;475;476;477;478;479;480;481;482;483;484;485;486;487;488;489;490;491;492;493;494;495;496;497;498;499;500;848;849;850;851;852;853;854;855;884;885;886;887;1846;1847;1848;1849;1850;1851;1852;1853;1854;1855;1856;1857;1858;1859;1860;1861;1862;1863;1864;2220;2221;2222;2223;2224;2225;2226;2227;2228;2229;2230;2231;2232…	77;78;79;80;528;529;530;531;532;533;534;535;536;537;538;539;540;541;542;543;544;545;546;547;548;549;550;551;552;553;554;555;556;557;558;559;560;561;562;563;564;565;566;567;568;569;570;571;572;573;574;575;576;577;578;579;580;581;582;583;584;585;586;587;588;589;590;591;592;593;594;595;596;597;1039;1040;1041;1042;1043;1044;1045;1046;1047;1048;1049;1080;1081;1082;1083;2222;2223;2224;2225;2226;2227;22…	77;581;595;1048;1081;1083;2260;2879;2887;5827;8882;9441;10983;13297	43;44	0	171;228	230
A0A075B6S6;A0A075B6P5;P06310;P01615;P01614	A0A075B6S6;A0A075B6P5;P06310;P01615;P01614	Ig kappa chain V-II region RPMI 6410;Ig kappa chain V-II region FR;Ig kappa chain V-II region Cum	IGKV2D-30;IGKV2D-28	sp|A0A075B6S6|KVD30_HUMAN Immunoglobulin kappa variable 2D-30 OS=Homo sapiens GN=IGKV2D-30 PE=3 SV=1;sp|A0A075B6P5|KV228_HUMAN Immunoglobulin kappa variable 2-28 OS=Homo sapiens GN=IGKV2-28 PE=3 SV=1;sp|P06310|KV230_HUMAN Immunoglobulin kappa variable 2-30	13.215	120	2	2	1	13.3	13.3	10.8	7142300000	2969300000	3997700000	1	1	2	10.8	10.8	13.3	395330000	492530000	806450000	61430000000				0	573;574	True;True	592;593	2113;2114;2115;2116;2117;2118;2119;2120;2121;2122;2123;2124;2125;2126;2127;2128;2129;2130;2131;2132;2133;2134;2135;2136;2137;2138;2139;2140;2141;2142;2143;2144;2145;2146;2147;2148;2149;2150;2151;2152;2153;2154;2155	2641;2642;2643;2644;2645;2646;2647;2648;2649;2650;2651;2652;2653;2654;2655;2656;2657;2658;2659;2660;2661;2662;2663;2664;2665;2666;2667;2668;2669;2670;2671;2672;2673;2674;2675;2676;2677;2678;2679;2680;2681;2682;2683;2684;2685;2686;2687;2688;2689;2690;2691;2692;2693;2694;2695;2696;2697;2698;2699;2700;2701;2702;2703;2704;2705;2706;2707;2708;2709;2710;2711;2712;2713;2714;2715;2716;2717;2718;2719;2720…	2706;2750
P08238;Q58FF7;Q58FF6	P08238	Heat shock protein HSP 90-beta	HSP90AB1	sp|P08238|HS90B_HUMAN Heat shock protein HSP 90-beta OS=Homo sapiens GN=HSP90AB1 PE=1 SV=4	83.263	724	6	9	21	9.7	15.6	29.6	30452000	56521000	587410000	0	2	17	0	3.2	24.9	0	4023100	414510000	8559800000				106	31;38;99;120;223;287;361;362;379;380;381;403;420;421;425;444;457;630;742;760;792;1059;1244;1385;1565;1670;1671;1697;1702;1847;1865;2032;2174;2175;2176;2192;2195	True;True;True;True;True;True;True;True;True;True;True;True;True;True;True;True;True;True;True;True;True;True;True;True;True;True;True;True;True;True;True;True;True;True;True;True;True	31;38;100;121;229;296;373;374;392;393;394;417;435;436;440;459;473;649;763;781;813;1088;1277;1442;1629;1736;1737;1763;1768;1917;1935;2113;2262;2263;2264;2280;2281;2284	67;68;69;70;71;85;86;87;88;89;90;91;92;285;286;361;362;363;745;1009;1010;1011;1271;1272;1273;1274;1275;1276;1277;1278;1279;1357;1358;1359;1360;1361;1362;1363;1364;1365;1366;1444;1445;1446;1447;1498;1499;1500;1501;1502;1503;1504;1505;1506;1507;1508;1509;1510;1511;1512;1513;1514;1515;1516;1517;1518;1519;1541;1542;1595;1596;1597;1598;1644;1645;1646;1647;1648;1649;1650;1651;1652;1653;2373;2835;2836;2…	70;71;72;73;74;88;89;90;91;92;93;94;95;96;97;315;316;317;427;428;429;908;1208;1209;1210;1519;1520;1521;1522;1523;1524;1525;1526;1527;1528;1628;1629;1630;1631;1632;1633;1634;1635;1636;1637;1749;1750;1751;1752;1811;1812;1813;1814;1815;1816;1817;1818;1819;1820;1821;1822;1823;1824;1825;1826;1827;1828;1829;1830;1831;1832;1833;1855;1856;1916;1917;1918;1919;1969;1970;1971;1972;1973;1974;1975;1976;1977;1…	71;96;316;429;908;1208;1520;1527;1628;1631;1634;1749;1814;1831;1856;1917;1974;3044;3636;3882;4483;6298;7907;8638;9427;10541;10542;10894;10922;11636;11779;12793;13512;13525;13526;13566;13631	50		466
P62979;P62987;P0CG47;P0CG48	P62979;P62987;P0CG47;P0CG48	Ubiquitin-40S ribosomal protein S27a;Ubiquitin;40S ribosomal protein S27a;Ubiquitin-60S ribosomal protein L40;Ubiquitin;60S ribosomal protein L40;Polyubiquitin-B;Ubiquitin;Polyubiquitin-C;Ubiquitin	RPS27A;UBA52;UBB;UBC	sp|P62979|RS27A_HUMAN Ubiquitin-40S ribosomal protein S27a OS=Homo sapiens GN=RPS27A PE=1 SV=2;sp|P62987|RL40_HUMAN Ubiquitin-60S ribosomal protein L40 OS=Homo sapiens GN=UBA52 PE=1 SV=2;sp|P0CG47|UBB_HUMAN Polyubiquitin-B OS=Homo sapiens GN=UBB PE=1 SV=1;	17.965	156	2	2	4	22.4	18.6	30.1	14437000	98919000	296570000	1	2	4	10.3	18.6	30.1	9431500	94790000	259290000	3519900000				239	351;377;471;888;1843;1863	True;True;True;True;True;True	363;390;487;914;1913;1933	1232;1355;1677;1678;1679;1680;1681;1682;1683;1684;1685;3850;3851;3852;3853;3854;3855;3856;3857;3858;3859;3860;3861;3862;3863;3864;3865;8618;8619;8620;8621;8622;8623;8624;8625;8626;8627;8628;8629;8630;8631;8632;8633;8634;8699;8700;8701;8702;8703;8704;8705	1479;1625;1626;2006;2007;2008;2009;2010;2011;2012;2013;2014;2015;2016;2017;2018;2019;2020;5033;5034;5035;5036;5037;5038;5039;5040;5041;5042;5043;5044;5045;5046;5047;5048;5049;5050;5051;5052;5053;5054;5055;5056;5057;5058;5059;5060;5061;5062;5063;5064;5065;5066;5067;5068;5069;5070;5071;5072;5073;5074;5075;5076;5077;5078;5079;5080;5081;5082;5083;5084;5085;5086;5087;5088;5089;5090;5091;11610;11611;11…	1479;1625;2018;5089;11624;11749
Q9Y5B9	Q9Y5B9	FACT complex subunit SPT16	SUPT16H	sp|Q9Y5B9|SP16H_HUMAN FACT complex subunit SPT16 OS=Homo sapiens GN=SUPT16H PE=1 SV=1	119.91	1047	0	5	21	0	5.5	22.5	0	13711000	206590000	0	1	13	0	1.1	14.2	0	0	98898000	2549000000				404	11;24;146;208;209;272;279;357;366;378;383;404;405;468;586;614;691;875;934;1212;1274;1290;1322;1325;1341;1357;1460;1714;1783;1907;2085;2086;2163;2228	True;True;True;True;True;True;True;True;True;True;True;True;True;True;True;True;True;True;True;True;True;True;True;True;True;True;True;True;True;True;True;True;True;True	11;24;149;213;214;280;287;369;378;391;396;418;419;484;605;633;710;901;960;1245;1311;1331;1332;1372;1375;1394;1395;1411;1521;1780;1851;1979;2169;2170;2171;2172;2251;2318	25;26;27;28;29;49;50;51;52;53;417;418;419;420;421;422;423;424;686;687;688;689;690;691;692;693;694;946;947;948;949;950;951;962;1253;1297;1298;1299;1300;1301;1356;1368;1369;1370;1448;1449;1450;1451;1452;1453;1454;1455;1456;1457;1458;1459;1460;1461;1462;1463;1464;1670;1671;1672;1673;2250;2325;2326;2327;2328;2616;2617;2618;3819;3820;3821;3822;3823;3824;4020;4021;4022;4023;5671;5672;5673;5674;5675;583…	27;28;29;30;31;32;52;53;54;55;56;483;484;485;486;487;488;489;490;829;830;831;832;833;834;835;836;837;838;1144;1145;1146;1147;1148;1149;1160;1501;1546;1547;1548;1549;1550;1627;1639;1640;1641;1753;1754;1755;1756;1757;1758;1759;1760;1761;1762;1763;1764;1765;1766;1767;1768;1769;1770;1771;1772;1773;1774;1999;2000;2001;2002;2915;2992;2993;2994;2995;3341;3342;3343;5002;5003;5004;5005;5006;5007;5291;5292…	30;56;486;833;836;1144;1160;1501;1549;1627;1641;1753;1774;2000;2915;2992;3341;5003;5291;7806;7981;8035;8261;8267;8349;8499;8931;10961;11358;11987;12963;12972;13344;13797	109;110;111;112		203;352;559;676
P11142;P11142-2;P54652	P11142;P11142-2	Heat shock cognate 71 kDa protein	HSPA8	sp|P11142|HSP7C_HUMAN Heat shock cognate 71 kDa protein OS=Homo sapiens GN=HSPA8 PE=1 SV=1;sp|P11142-2|HSP7C_HUMAN Isoform 2 of Heat shock cognate 71 kDa protein OS=Homo sapiens GN=HSPA8	70.897	646	6	3	17	12.2	6.2	28.9	25668000	13998000	200300000	0	0	14	0	0	24.5	0	0	152990000	1116800000				115	171;236;387;516;524;833;834;911;912;1126;1279;1398;1399;1404;1548;1570;1642;1732;1758;1925;1944;2109	True;True;True;True;True;False;True;True;True;True;True;True;True;True;True;True;True;True;True;True;True;True	175;242;400;534;542;854;855;937;938;1156;1317;1455;1456;1457;1458;1463;1611;1634;1708;1798;1825;2000;2022;2195	577;787;788;789;790;1383;1384;1865;1866;1881;1882;3521;3522;3523;3524;3525;3526;3527;3528;3529;3530;3531;3532;3533;3534;3535;3981;3982;5064;5065;5066;5067;5846;6433;6434;6435;6436;6437;6438;6439;6440;6441;6442;6443;6444;6461;6462;6976;7051;7052;7053;7054;7055;7056;7661;7662;7663;7664;8158;8159;8160;8161;8162;8304;8305;8306;8307;8308;8309;8310;8958;8959;8960;8961;8962;8963;8964;8965;8966;8967;9045…	709;966;967;968;969;970;1665;1666;2269;2270;2286;2287;4616;4617;4618;4619;4620;4621;4622;4623;4624;4625;4626;4627;4628;4629;4630;4631;5249;5250;6796;6797;6798;6799;7991;8689;8690;8691;8692;8693;8694;8695;8696;8697;8698;8699;8700;8729;8730;9362;9443;9444;9445;9446;9447;9448;10297;10298;10299;10300;11000;11001;11002;11003;11004;11005;11254;11255;11256;11257;11258;11259;11260;11261;11262;12070;12071…	709;967;1666;2269;2287;4623;4624;5249;5250;6799;7991;8690;8698;8729;9362;9443;10298;11003;11262;12071;12171;13094	54		61
O15034	O15034	RIMS-binding protein 2	RIMBP2	sp|O15034|RIMB2_HUMAN RIMS-binding protein 2 OS=Homo sapiens GN=RIMBP2 PE=1 SV=3	116.02	1052	1	1	1	1.3	1.3	1.3	451950000	149940000	157770000	0	0	0	0	0	0	0	0	0	966710000				49	1443	TRUE	1503	6572;6573;6574;6575;6576	8851;8852;8853;8854;8855	8852
Q08499-7;Q08499-12;Q08499-6	Q08499-7;Q08499-12;Q08499-6			sp|Q08499-7|PDE4D_HUMAN Isoform N3 of cAMP-specific 3,5-cyclic phosphodiesterase 4D OS=Homo sapiens GN=PDE4D;sp|Q08499-12|PDE4D_HUMAN Isoform 12 of cAMP-specific 3,5-cyclic phosphodiesterase 4D OS=Homo sapiens GN=PDE4D;sp|Q08499-6|PDE4D_HUMAN Isoform 5	23.839	215	1	1	1	3.7	3.7	3.7	1224300000	85912000	130110000	1	0	1	3.7	0	3.7	516410000	0	741730000	5230700000				273	1197	TRUE	1230	5321;5322;5323;5324;5325;5326;5327;5328;5329;5330;5331;5332	7135;7136;7137;7138;7139;7140;7141;7142;7143;7144;7145;7146	7146
P0DMV9;P0DMV8;P0DMV8-2	P0DMV9;P0DMV8;P0DMV8-2	Heat shock 70 kDa protein 1B;Heat shock 70 kDa protein 1A	HSPA1B;HSPA1A	sp|P0DMV9|HS71B_HUMAN Heat shock 70 kDa protein 1B OS=Homo sapiens GN=HSPA1B PE=1 SV=1;sp|P0DMV8|HS71A_HUMAN Heat shock 70 kDa protein 1A OS=Homo sapiens GN=HSPA1A PE=1 SV=1;sp|P0DMV8-2|HS71A_HUMAN Isoform 2 of Heat shock 70 kDa protein 1A OS=Homo sapiens	70.051	641	4	4	12	8.7	7.6	21.7	6935300	6267200	129680000	0	0	11	0	0	18.9	0	0	114850000	670220000				110	163;189;238;284;523;531;836;911;912;946;1127;1193;1309;1396;1397;1763;1925;2110;2201	True;True;True;True;True;True;True;False;False;True;True;True;True;True;True;True;False;True;True	167;194;245;293;541;550;857;937;938;973;1157;1226;1359;1453;1454;1830;2000;2196;2290	529;530;531;532;533;637;638;639;640;641;794;795;796;797;798;799;800;1000;1878;1879;1880;1945;1946;1947;1948;3540;3541;3542;3543;3544;3545;3546;3981;3982;4057;4058;4059;5068;5069;5070;5071;5072;5317;6004;6005;6006;6419;6420;6421;6422;6423;6424;6425;6426;6427;6428;6429;6430;6431;6432;8324;8958;8959;8960;8961;8962;8963;8964;8965;8966;8967;9683;10105;10106;10107;10108;10109	637;638;639;640;641;779;780;781;782;783;784;974;975;976;977;978;979;980;1198;2283;2284;2285;2354;2355;2356;2357;4637;4638;4639;4640;4641;4642;4643;5249;5250;5334;5335;5336;6800;6801;6802;6803;6804;7131;8180;8181;8182;8675;8676;8677;8678;8679;8680;8681;8682;8683;8684;8685;8686;8687;8688;11276;12070;12071;12072;12073;12074;12075;12076;12077;12078;12079;13095;13653;13654;13655;13656;13657	639;780;978;1198;2284;2354;4642;5249;5250;5335;6802;7131;8181;8678;8688;11276;12071;13095;13655
P62861	P62861	40S ribosomal protein S30	FAU	sp|P62861|RS30_HUMAN 40S ribosomal protein S30 OS=Homo sapiens GN=FAU PE=1 SV=1	6.6478	59	1	1	2	16.9	16.9	18.6	37468000	34129000	109550000	1	2	2	16.9	18.6	18.6	34745000	50951000	74686000	920550000				237	592;593;1571	True;True;True	611;612;1635	2259;2260;2261;2262;2263;2264;2265;2266;2267;2268;2269;2270;2271;2272;2273;2274;2275;7057;7058;7059;7060;7061;7062	2924;2925;2926;2927;2928;2929;2930;2931;2932;2933;2934;2935;2936;2937;2938;2939;2940;2941;9449;9450;9451;9452;9453;9454	2924;2937;9450
P46013-2;P46013	P46013-2;P46013	Antigen KI-67	MKI67	sp|P46013-2|KI67_HUMAN Isoform Short of Proliferation marker protein Ki-67 OS=Homo sapiens GN=MKI67;sp|P46013|KI67_HUMAN Proliferation marker protein Ki-67 OS=Homo sapiens GN=MKI67 PE=1 SV=2	319.44	2896	0	0	1	0	0	1.2	0	0	100670000	0	1	1	0	1.2	1.2	0	4422300	40316000	422840000				194	1893	TRUE	1965	8834;8835;8836;8837;8838;8839	11926;11927;11928;11929;11930;11931;11932	11929	73		1178
P07900;P07900-2;Q58FG0;Q14568;Q58FG1	P07900;P07900-2	Heat shock protein HSP 90-alpha	HSP90AA1	sp|P07900|HS90A_HUMAN Heat shock protein HSP 90-alpha OS=Homo sapiens GN=HSP90AA1 PE=1 SV=5;sp|P07900-2|HS90A_HUMAN Isoform 2 of Heat shock protein HSP 90-alpha OS=Homo sapiens GN=HSP90AA1	84.659	732	3	3	20	5.1	4.9	25	6555100	3599300	96365000	0	2	18	0	3.1	24.9	0	2896300	119060000	1103400000				102	38;121;145;286;297;361;362;379;380;381;403;418;419;422;423;444;598;742;758;761;771;1058;1247;1384;1566;1697;1807;1847;1866;2032;2174;2175;2195;2238;2239	False;True;True;True;True;False;False;False;False;False;False;True;True;True;True;False;True;False;True;True;True;True;True;True;True;False;True;False;True;False;False;False;False;True;True	38;122;148;295;306;373;374;392;393;394;417;433;434;437;438;459;617;763;779;782;792;1087;1281;1441;1630;1763;1875;1917;1936;2113;2262;2263;2284;2329;2330	85;86;87;88;89;90;91;92;364;365;415;416;1003;1004;1005;1006;1007;1008;1028;1029;1030;1031;1032;1033;1034;1035;1036;1271;1272;1273;1274;1275;1276;1277;1278;1279;1357;1358;1359;1360;1361;1362;1363;1364;1365;1366;1444;1445;1446;1447;1492;1493;1494;1495;1496;1497;1520;1521;1522;1523;1524;1525;1526;1527;1528;1529;1530;1531;1532;1533;1534;1535;1536;1537;1538;1539;1595;1596;1597;1598;2286;2287;2288;2289…	88;89;90;91;92;93;94;95;96;97;430;431;481;482;1201;1202;1203;1204;1205;1206;1207;1227;1228;1229;1230;1231;1232;1233;1234;1235;1236;1237;1238;1519;1520;1521;1522;1523;1524;1525;1526;1527;1528;1628;1629;1630;1631;1632;1633;1634;1635;1636;1637;1749;1750;1751;1752;1803;1804;1805;1806;1807;1808;1809;1810;1834;1835;1836;1837;1838;1839;1840;1841;1842;1843;1844;1845;1846;1847;1848;1849;1850;1851;1852;185…	96;431;482;1202;1229;1520;1527;1628;1631;1634;1749;1804;1810;1844;1853;1917;2953;3636;3872;3888;4442;6291;7919;8626;9436;10894;11484;11636;11782;12793;13512;13525;13631;13832;13836
P61956-2;P61956;Q6EEV6;P55854;P55854-2	P61956-2;P61956	Small ubiquitin-related modifier 2	SUMO2	sp|P61956-2|SUMO2_HUMAN Isoform 2 of Small ubiquitin-related modifier 2 OS=Homo sapiens GN=SUMO2;sp|P61956|SUMO2_HUMAN Small ubiquitin-related modifier 2 OS=Homo sapiens GN=SUMO2 PE=1 SV=3	8.1111	71	1	1	2	16.9	16.9	31	2011400	41576000	91985000	0	0	1	0	0	16.9	0	0	27075000	824170000				227	29;1816;1959	True;True;True	29;1884;2038	65;8542;8543;8544;8545;8546;9083;9084;9085;9086;9087;9088;9089;9090	68;11532;11533;11534;11535;11536;11537;12205;12206;12207;12208;12209;12210;12211;12212;12213	68;11535;12205
P62805	P62805	Histone H4	HIST1H4A	sp|P62805|H4_HUMAN Histone H4 OS=Homo sapiens GN=HIST1H4A PE=1 SV=2	11.367	103	5	5	6	49.5	49.5	50.5	67512000	65437000	90382000	2	3	4	21.4	31.1	42.7	7683500	16841000	25405000	946260000				234	243;283;900;1867;1942;1943;1998	True;True;True;True;True;True;True	250;292;926;1937;2018;2019;2020;2021;2079	832;833;834;835;836;837;838;839;840;841;842;843;844;845;846;847;981;982;983;984;985;986;987;988;989;990;991;992;993;994;995;996;997;998;999;3920;3921;3922;3923;3924;3925;3926;3927;3928;3929;3930;8731;8732;8733;8734;9037;9038;9039;9040;9041;9042;9043;9044;9335;9336;9337	1023;1024;1025;1026;1027;1028;1029;1030;1031;1032;1033;1034;1035;1036;1037;1038;1179;1180;1181;1182;1183;1184;1185;1186;1187;1188;1189;1190;1191;1192;1193;1194;1195;1196;1197;5180;5181;5182;5183;5184;5185;5186;5187;5188;5189;5190;11784;11785;11786;11787;12158;12159;12160;12161;12162;12163;12164;12165;12712;12713;12714	1032;1197;5180;11784;12158;12164;12713	78		85
Q99880;Q99879;Q99877;Q93079;Q5QNW6;Q16778;P62807;P58876;P57053;P33778;P23527;P06899;O60814;Q5QNW6-2;Q8N257;Q96A08	Q99880;Q99879;Q99877;Q93079;Q5QNW6;Q16778;P62807;P58876;P57053;P33778;P23527;P06899;O60814;Q5QNW6-2;Q8N257;Q96A08	Histone H2B type 1-L;Histone H2B type 1-M;Histone H2B type 1-N;Histone H2B type 1-H;Histone H2B type 2-F;Histone H2B type 2-E;Histone H2B type 1-C/E/F/G/I;Histone H2B type 1-D;Histone H2B type F-S;Histone H2B type 1-B;Histone H2B type 1-O;Histone H2B type 1-J;Histone H2B type 1-K;Histone H2B type 3-B;Histone H2B type 1-A	HIST1H2BL;HIST1H2BM;HIST1H2BN;HIST1H2BH;HIST2H2BF;HIST2H2BE;HIST1H2BC;HIST1H2BD;H2BFS;HIST1H2BB;HIST1H2BO;HIST1H2BJ;HIST1H2BK;HIST3H2BB;HIST1H2BA	sp|Q99880|H2B1L_HUMAN Histone H2B type 1-L OS=Homo sapiens GN=HIST1H2BL PE=1 SV=3;sp|Q99879|H2B1M_HUMAN Histone H2B type 1-M OS=Homo sapiens GN=HIST1H2BM PE=1 SV=3;sp|Q99877|H2B1N_HUMAN Histone H2B type 1-N OS=Homo sapiens GN=HIST1H2BN PE=1 SV=3;sp|Q93079|	13.952	126	3	2	3	21.4	14.3	21.4	36600000	21719000	85622000	0	0	0	0	0	0	0	0	0	218210000				59	139;397;1120;1553	True;True;True;True	142;410;1149;1616	405;406;1417;1418;1419;1420;1421;5037;5038;6997;6998;6999;7000;7001	471;472;1722;1723;1724;1725;1726;6769;6770;9384;9385;9386;9387;9388	471;1724;6770;9387	36;37		60;63
P62241	P62241	40S ribosomal protein S8	RPS8	sp|P62241|RS8_HUMAN 40S ribosomal protein S8 OS=Homo sapiens GN=RPS8 PE=1 SV=2	24.205	208	6	3	5	32.2	14.9	26	80529000	29117000	77913000	2	0	3	11.5	0	14.9	5135500	0	14023000	538040000				230	30;415;827;904;1089;1090;1218;1315;2170	True;True;True;True;True;True;True;True;True	30;429;848;930;1118;1119;1251;1365;2258	66;1482;1483;1484;1485;3506;3507;3508;3509;3510;3511;3512;3513;3514;3950;3951;3952;3953;3954;3955;3956;3957;3958;3959;3960;3961;3962;4958;4959;4960;4961;5687;5688;5689;5690;5691;5692;5693;6027;9973;9974	69;1793;1794;1795;1796;4601;4602;4603;4604;4605;4606;4607;4608;4609;5215;5216;5217;5218;5219;5220;5221;5222;5223;5224;5225;5226;5227;6682;6683;6684;6685;7822;7823;7824;7825;7826;7827;7828;8209;13489;13490	69;1796;4604;5227;6682;6685;7825;8209;13489
Q969Q0	Q969Q0	60S ribosomal protein L36a-like	RPL36AL	sp|Q969Q0|RL36L_HUMAN 60S ribosomal protein L36a-like OS=Homo sapiens GN=RPL36AL PE=1 SV=3	12.469	106	5	4	3	37.7	35.8	28.3	59877000	26624000	59079000	2	2	2	20.8	16	16	3316300	2093700	3706100	269480000				355	308;674;750;1026;1532	True;True;True;True;True	317;693;771;1055;1595	1054;1055;2570;2875;2876;2877;2878;2879;4417;4418;4419;4420;4421;4422;4423;4424;4425;6875;6876;6877;6878;6879;6880;6881	1257;1258;3295;3685;3686;3687;3688;3689;3690;3691;5816;5817;5818;5819;5820;5821;5822;5823;5824;5825;5826;9219;9220;9221;9222;9223;9224;9225;9226;9227	1258;3295;3690;5816;9222
Q08945	Q08945	FACT complex subunit SSRP1	SSRP1	sp|Q08945|SSRP1_HUMAN FACT complex subunit SSRP1 OS=Homo sapiens GN=SSRP1 PE=1 SV=1	81.074	709	0	0	8	0	0	13.3	0	0	49678000	0	0	4	0	0	6.8	0	0	6932100	783340000				275	42;57;184;429;517;886;920;1043;1376;1480;1481;1610;1638;1821;1829;1977	True;True;True;True;True;True;True;True;True;True;True;True;True;True;True;True	42;57;189;444;535;912;946;1072;1432;1433;1542;1543;1674;1704;1890;1898;2058	102;103;104;105;106;107;170;171;627;628;629;1548;1549;1550;1551;1867;1868;1869;3844;3845;3846;3847;3993;4473;6353;6354;6355;6356;6357;6696;6697;6698;6699;6700;6701;6702;6703;7549;7550;7551;7552;7640;7641;8556;8557;8558;8581;8582;8583;9286;9287;9288;9289	107;108;109;110;111;112;197;198;767;768;769;1863;1864;1865;1866;2271;2272;2273;2274;5027;5028;5029;5030;5263;5889;8606;8607;8608;8609;8610;8611;9006;9007;9008;9009;9010;9011;9012;9013;10165;10166;10167;10168;10276;10277;11547;11548;11549;11573;11574;11575;12655;12656;12657;12658	111;197;767;1864;2271;5027;5263;5889;8606;9006;9011;10165;10276;11548;11575;12656	93;94		306;313
Q07020-2;Q07020	Q07020-2;Q07020	60S ribosomal protein L18	RPL18	sp|Q07020-2|RL18_HUMAN Isoform 2 of 60S ribosomal protein L18 OS=Homo sapiens GN=RPL18;sp|Q07020|RL18_HUMAN 60S ribosomal protein L18 OS=Homo sapiens GN=RPL18 PE=1 SV=2	18.091	159	4	3	5	28.3	21.4	36.5	84872000	11223000	49394000	2	1	2	14.5	6.3	14.5	4316100	959860	5512500	449560000				269	613;864;1799;1880;1881;1882	True;True;True;True;True;True	632;890;1867;1952;1953;1954	2319;2320;2321;2322;2323;2324;3798;3799;3800;3801;8455;8456;8457;8458;8459;8460;8461;8462;8463;8464;8797;8798;8799;8800;8801;8802;8803;8804;8805;8806;8807;8808;8809;8810;8811;8812	2986;2987;2988;2989;2990;2991;4980;4981;4982;4983;11436;11437;11438;11439;11440;11441;11442;11443;11444;11445;11446;11889;11890;11891;11892;11893;11894;11895;11896;11897;11898;11899;11900;11901;11902;11903;11904	2986;4981;11443;11889;11899;11902
P63261;P60709;P63267;P68133;P68032;P62736;P63267-2;Q6S8J3;A5A3E0;P0CG38;Q9BYX7;Q562R1;P0CG39	P63261;P60709;P63267;P68133;P68032;P62736;P63267-2	Actin, cytoplasmic 2;Actin, cytoplasmic 2, N-terminally processed;Actin, cytoplasmic 1;Actin, cytoplasmic 1, N-terminally processed;Actin, gamma-enteric smooth muscle;Actin, alpha skeletal muscle;Actin, alpha cardiac muscle 1;Actin, aortic smooth muscle	ACTG1;ACTB;ACTG2;ACTA1;ACTC1;ACTA2	sp|P63261|ACTG_HUMAN Actin, cytoplasmic 2 OS=Homo sapiens GN=ACTG1 PE=1 SV=1;sp|P60709|ACTB_HUMAN Actin, cytoplasmic 1 OS=Homo sapiens GN=ACTB PE=1 SV=1;sp|P63267|ACTH_HUMAN Actin, gamma-enteric smooth muscle OS=Homo sapiens GN=ACTG2 PE=1 SV=1;sp|P68133|AC	41.792	375	7	5	7	21.6	16.8	17.9	59193000	42407000	49161000	0	0	0	0	0	0	0	0	0	502960000				223	69;199;309;310;398;748;825;1471;1784;1964	True;True;True;True;True;True;True;True;True;True	69;204;318;319;411;412;769;846;1533;1852;2043	208;209;210;211;212;665;666;667;668;669;670;671;672;1056;1057;1058;1059;1060;1422;1423;1424;1425;1426;1427;1428;1429;2864;2865;2866;2867;2868;2869;3500;3501;3502;3503;3504;6659;6660;6661;6662;6663;6664;8397;8398;8399;9098;9099;9100;9101;9102	235;236;237;238;239;240;808;809;810;811;812;813;814;815;1259;1260;1261;1262;1263;1727;1728;1729;1730;1731;1732;1733;1734;3672;3673;3674;3675;3676;3677;3678;3679;4595;4596;4597;4598;4599;8959;8960;8961;8962;8963;8964;8965;8966;8967;8968;11362;11363;11364;12221;12222;12223;12224;12225	236;811;1261;1262;1734;3672;4599;8962;11362;12221	77		325
P68104-2;Q5VTE0;P68104;Q05639	P68104-2;Q5VTE0;P68104;Q05639	Elongation factor 1-alpha 1;Putative elongation factor 1-alpha-like 3;Elongation factor 1-alpha 2	EEF1A1;EEF1A1P5;EEF1A2	sp|P68104-2|EF1A1_HUMAN Isoform 2 of Elongation factor 1-alpha 1 OS=Homo sapiens GN=EEF1A1;sp|Q5VTE0|EF1A3_HUMAN Putative elongation factor 1-alpha-like 3 OS=Homo sapiens GN=EEF1A1P5 PE=5 SV=1;sp|P68104|EF1A1_HUMAN Elongation factor 1-alpha 1 OS=Homo sapie	47.869	441	3	3	4	7	7	9.3	35130000	27891000	44966000	0	0	0	0	0	0	0	0	0	323720000				243	817;1157;1770;1838;1992;2240	True;True;True;True;True;True	838;1189;1838;1907;2073;2331	3467;3468;3469;3470;3471;3472;3473;3474;3475;5188;5189;5190;8366;8367;8608;9326;9327;10265;10266;10267;10268	4562;4563;4564;4565;4566;4567;4568;4569;4570;6950;6951;6952;6953;11329;11330;11331;11600;12702;12703;13839;13840;13841;13842	4569;6951;11331;11600;12702;13839
P46776	P46776	60S ribosomal protein L27a	RPL27A	sp|P46776|RL27A_HUMAN 60S ribosomal protein L27a OS=Homo sapiens GN=RPL27A PE=1 SV=2	16.561	148	3	2	3	22.3	14.2	22.3	73026000	17410000	44427000	2	1	1	15.5	7.4	7.4	11693000	4839600	5294400	299640000				196	1251;1395;1828	True;True;True	1285;1452;1897	5792;5793;5794;6416;6417;6418;8569;8570;8571;8572;8573;8574;8575;8576;8577;8578;8579;8580	7937;7938;7939;8672;8673;8674;11561;11562;11563;11564;11565;11566;11567;11568;11569;11570;11571;11572	7937;8672;11568
P09874	P09874	Poly [ADP-ribose] polymerase 1	PARP1	sp|P09874|PARP1_HUMAN Poly [ADP-ribose] polymerase 1 OS=Homo sapiens GN=PARP1 PE=1 SV=4	113.08	1014	0	0	11	0	0	14.1	0	0	43506000	0	0	3	0	0	3.6	0	0	12035000	586600000				109	54;636;651;764;782;947;958;963;1170;1275;1301;1530;1608;1791;1853;1923;2002;2020;2135;2136;2142	True;True;True;True;True;True;True;True;True;True;True;True;True;True;True;True;True;True;True;True;True	54;655;670;785;803;974;985;990;1203;1312;1350;1593;1672;1859;1923;1998;2083;2101;2223;2224;2230	152;153;2392;2393;2394;2395;2396;2397;2454;2455;2456;2457;3036;3382;4060;4061;4062;4063;4094;4103;4104;4105;4106;4107;4108;4109;5224;5225;5837;5985;5986;5987;6869;6870;6871;6872;6873;7546;8440;8658;8659;8952;8953;8954;8955;8956;9345;9392;9393;9394;9795;9796;9797;9798;9799;9800;9813;9814;9815;9816;9817;9818;9819	175;176;3067;3068;3069;3070;3071;3072;3153;3154;3155;3156;3941;4463;5337;5338;5339;5340;5388;5397;5398;5399;5400;5401;5402;5403;5404;6992;6993;7982;8161;8162;8163;9213;9214;9215;9216;9217;10162;11421;11653;11654;12064;12065;12066;12067;12068;12722;12769;12770;12771;13218;13219;13220;13221;13222;13223;13224;13237;13238;13239;13240;13241;13242;13243	176;3069;3153;3941;4463;5338;5388;5398;6992;7982;8163;9217;10162;11421;11653;12066;12722;12771;13221;13223;13238
Q14980-2;Q14980;Q14980-4;Q14980-3;Q14980-5	Q14980-2;Q14980;Q14980-4;Q14980-3	Nuclear mitotic apparatus protein 1	NUMA1	sp|Q14980-2|NUMA1_HUMAN Isoform 2 of Nuclear mitotic apparatus protein 1 OS=Homo sapiens GN=NUMA1;sp|Q14980|NUMA1_HUMAN Nuclear mitotic apparatus protein 1 OS=Homo sapiens GN=NUMA1 PE=1 SV=2;sp|Q14980-4|NUMA1_HUMAN Isoform Numa-s of Nuclear mitotic apparat	236.51	2101	1	6	18	0.6	3.4	10.2	954350	10872000	40677000	2	7	10	1.1	4.1	5.8	2780100	14124000	21862000	100200000				302	4;12;129;160;162;204;301;367;372;432;820;1032;1124;1171;1209;1451;1464;1475;1524;1727;1958;1987	True;True;True;True;True;True;True;True;True;True;True;True;True;True;True;True;True;True;True;True;True;True	4;12;132;164;166;209;310;379;384;447;841;1061;1154;1204;1242;1511;1525;1537;1587;1793;2037;2068	15;30;385;386;387;521;525;526;527;528;681;1040;1041;1042;1043;1044;1302;1303;1304;1305;1320;1554;3481;4435;5051;5052;5053;5054;5055;5056;5057;5058;5059;5060;5226;5227;5228;5667;6586;6587;6645;6682;6861;8152;9080;9081;9082;9311;9312	17;33;451;452;453;629;633;634;635;636;824;1242;1243;1244;1245;1246;1551;1552;1553;1554;1571;1869;4576;5836;6783;6784;6785;6786;6787;6788;6789;6790;6791;6792;6994;6995;6996;7800;8865;8866;8944;8992;9205;10994;12202;12203;12204;12683;12684	17;33;451;629;634;824;1245;1554;1571;1869;4576;5836;6789;6994;7800;8865;8944;8992;9205;10994;12203;12684
P16403;P10412;P16402;P22492;Q02539	P16403;P10412;P16402	Histone H1.2;Histone H1.4;Histone H1.3	HIST1H1C;HIST1H1E;HIST1H1D	sp|P16403|H12_HUMAN Histone H1.2 OS=Homo sapiens GN=HIST1H1C PE=1 SV=2;sp|P10412|H14_HUMAN Histone H1.4 OS=Homo sapiens GN=HIST1H1E PE=1 SV=2;sp|P16402|H13_HUMAN Histone H1.3 OS=Homo sapiens GN=HIST1H1D PE=1 SV=2	21.364	213	3	1	2	18.3	5.2	12.7	25405000	16580000	37533000	0	1	1	0	5.2	5.2	0	1400300	4645600	278400000				132	102;176;936;937;1634;1655	True;True;True;True;True;True	103;180;962;963;1700;1721	291;292;293;294;295;296;297;298;299;300;301;590;591;592;4025;4026;7627;7628;7629;7721;7722;7723;7724	322;323;324;325;326;327;328;329;330;331;332;333;725;726;727;5296;5297;10263;10264;10265;10379;10380;10381;10382	324;727;5296;5297;10265;10380
P49327	P49327	Fatty acid synthase;[Acyl-carrier-protein] S-acetyltransferase;[Acyl-carrier-protein] S-malonyltransferase;3-oxoacyl-[acyl-carrier-protein] synthase;3-oxoacyl-[acyl-carrier-protein] reductase;3-hydroxyacyl-[acyl-carrier-protein] dehydratase;Enoyl-[acyl-carrier-protein] reductase;Oleoyl-[acyl-carrier-protein] hydrolase	FASN	sp|P49327|FAS_HUMAN Fatty acid synthase OS=Homo sapiens GN=FASN PE=1 SV=3	273.42	2511	0	0	13	0	0	5.9	0	0	34535000	15	3	18	7.4	2.2	9.1	45486000	9351200	81176000	197150000				201	13;28;250;291;358;689;732;744;1109;1180;1192;1306;1558;1586;1588;1609;1621;1690;1708;1830;2008;2056;2146	True;True;True;True;True;True;True;True;True;True;True;True;True;True;True;True;True;True;True;True;True;True;True	13;28;258;300;370;708;753;765;1138;1213;1225;1356;1622;1650;1652;1673;1687;1756;1774;1899;2089;2138;2234	31;62;63;64;881;1016;1017;1254;1255;1256;1257;1258;1259;2614;2819;2820;2848;5014;5015;5249;5250;5251;5252;5253;5254;5255;5256;5316;5997;5998;5999;7023;7408;7413;7414;7415;7547;7548;7584;7585;7586;8001;8002;8003;8107;8108;8109;8110;8584;8585;9365;9366;9367;9493;9494;9826;9827;9828	34;65;66;67;1077;1215;1216;1502;1503;1504;1505;1506;1507;3339;3620;3621;3653;6746;6747;7017;7018;7019;7020;7021;7022;7023;7024;7130;8173;8174;8175;9414;9945;9950;9951;9952;10163;10164;10205;10206;10207;10813;10814;10815;10949;10950;10951;10952;11576;11577;12742;12743;12744;12886;12887;13250;13251;13252	34;67;1077;1215;1502;3339;3621;3653;6747;7022;7130;8175;9414;9945;9951;10164;10207;10813;10950;11577;12744;12886;13250
P35030-5;P35030-3;P35030-2;P35030-4;P35030	P35030-5;P35030-3;P35030-2;P35030-4;P35030	Trypsin-3	PRSS3	sp|P35030-5|TRY3_HUMAN Isoform 5 of Trypsin-3 OS=Homo sapiens GN=PRSS3;sp|P35030-3|TRY3_HUMAN Isoform 3 of Trypsin-3 OS=Homo sapiens GN=PRSS3;sp|P35030-2|TRY3_HUMAN Isoform 2 of Trypsin-3 OS=Homo sapiens GN=PRSS3;sp|P35030-4|TRY3_HUMAN Isoform 4 of Trypsin	25.924	240	1	1	1	5.4	5.4	5.4	36154000	26251000	32545000	1	1	1	5.4	5.4	5.4	25234000	25397000	30916000	206740000				176	2059	TRUE	2141	9498;9499;9500;9501;9502;9503;9504;9505;9506	12891;12892;12893;12894;12895;12896;12897;12898;12899	12899
P78527;P78527-2	P78527;P78527-2	DNA-dependent protein kinase catalytic subunit	PRKDC	sp|P78527|PRKDC_HUMAN DNA-dependent protein kinase catalytic subunit OS=Homo sapiens GN=PRKDC PE=1 SV=3;sp|P78527-2|PRKDC_HUMAN Isoform 2 of DNA-dependent protein kinase catalytic subunit OS=Homo sapiens GN=PRKDC	469.08	4128	23	1	10	6.7	0.3	3.1	72867000	1065600	31048000	4	0	8	1.2	0	2.2	8032700	0	17462000	165090000				251	194;220;221;249;295;427;594;662;773;824;849;850;878;945;984;1062;1093;1101;1147;1161;1294;1491;1492;1684;1685;1710;1729;1898;1951;2124;2213	True;True;True;True;True;True;True;True;True;True;True;True;True;True;True;True;True;True;True;True;True;True;True;True;True;True;True;True;True;True;True	199;226;227;257;304;442;613;681;794;845;874;875;904;972;1011;1091;1122;1130;1179;1193;1338;1553;1554;1750;1751;1776;1795;1970;2029;2211;2303	656;657;658;742;743;880;1025;1026;1545;2276;2277;2278;2547;2548;3364;3365;3366;3367;3368;3369;3370;3499;3748;3749;3750;3751;3829;4056;4246;4780;4964;4979;4980;4981;4982;4983;5169;5198;5199;5938;5939;6776;6777;6778;7942;7943;7944;7945;7946;8112;8155;8849;8850;9065;9731;9732;9733;9734;10192	799;800;801;905;906;1076;1224;1225;1859;1860;2942;2943;2944;3272;3273;4445;4446;4447;4448;4449;4450;4451;4594;4926;4927;4928;4929;5012;5333;5612;6322;6688;6703;6704;6705;6706;6707;6931;6961;6962;8109;8110;9113;9114;9115;10680;10681;10682;10683;10684;10954;10997;11942;11943;12187;13145;13146;13147;13148;13764	800;905;906;1076;1224;1860;2942;3272;4451;4594;4926;4928;5012;5333;5612;6322;6688;6704;6931;6961;8109;9113;9114;10681;10684;10954;10997;11943;12187;13146;13764
P68363;Q71U36-2;Q9BQE3;Q71U36;P68363-2;Q13748-2;Q13748;P68366-2;P68366;Q6PEY2;Q9NY65-2;Q9NY65;A6NHL2-2;A6NHL2	P68363;Q71U36-2;Q9BQE3;Q71U36;P68363-2;Q13748-2;Q13748;P68366-2;P68366;Q6PEY2	Tubulin alpha-1B chain;Tubulin alpha-1A chain;Tubulin alpha-1C chain;Tubulin alpha-3C/D chain;Tubulin alpha-4A chain;Tubulin alpha-3E chain	TUBA1B;TUBA1A;TUBA1C;TUBA3C;TUBA4A;TUBA3E	sp|P68363|TBA1B_HUMAN Tubulin alpha-1B chain OS=Homo sapiens GN=TUBA1B PE=1 SV=1;sp|Q71U36-2|TBA1A_HUMAN Isoform 2 of Tubulin alpha-1A chain OS=Homo sapiens GN=TUBA1A;sp|Q9BQE3|TBA1C_HUMAN Tubulin alpha-1C chain OS=Homo sapiens GN=TUBA1C PE=1 SV=1;sp|Q71U3	50.151	451	3	3	6	8.9	8.6	16.2	18978000	9971800	28728000	0	0	0	0	0	0	0	0	0	211930000				244	200;324;353;393;819;1355;1500;1501;1664;1839	True;True;True;True;True;True;True;True;True;True	205;335;365;406;840;1409;1562;1563;1730;1908	673;674;675;1125;1126;1127;1128;1234;1235;1409;3477;3478;3479;3480;6240;6241;6242;6243;6244;6245;6246;6247;6802;6803;7820;7821;8609;8610;8611;8612	816;817;818;1342;1343;1344;1345;1481;1482;1714;4572;4573;4574;4575;8479;8480;8481;8482;8483;8484;8485;8486;9142;9143;10501;10502;11601;11602;11603;11604	816;1345;1481;1714;4574;8484;9142;9143;10502;11602
P62424	P62424	60S ribosomal protein L7a	RPL7A	sp|P62424|RL7A_HUMAN 60S ribosomal protein L7a OS=Homo sapiens GN=RPL7A PE=1 SV=2	29.995	266	6	4	4	21.1	12.4	12.4	71188000	16076000	25033000	0	0	0	0	0	0	0	0	0	235630000				231	78;79;973;1329;1542;1963;2094	True;True;True;True;True;True;True	78;79;1000;1379;1605;2042;2180	228;229;230;231;232;233;234;235;4159;6076;6077;6078;6079;6080;6963;6964;6965;6966;6967;6968;9094;9095;9096;9097;9605	258;259;260;261;262;263;264;265;5488;8281;8282;8283;8284;8285;9349;9350;9351;9352;9353;9354;12217;12218;12219;12220;13001	258;261;5488;8281;9354;12220;13001
P34932;P34932-2	P34932	Heat shock 70 kDa protein 4	HSPA4	sp|P34932|HSP74_HUMAN Heat shock 70 kDa protein 4 OS=Homo sapiens GN=HSPA4 PE=1 SV=4	94.33	840	0	0	7	0	0	9.9	0	0	25009000	0	0	6	0	0	8	0	0	26034000	74395000				175	64;71;435;549;564;1277;1311;2047	True;True;True;True;True;False;True;True	64;71;450;568;583;1315;1361;2129	187;215;216;1558;1559;1560;1561;2027;2028;2094;2095;5844;6008;6009;9450;9451;9452	214;243;244;1873;1874;1875;1876;2528;2529;2622;2623;7989;8184;8185;12827;12828;12829	214;244;1876;2529;2622;7989;8184;12828
P17066;P48741	P17066;P48741	Heat shock 70 kDa protein 6;Putative heat shock 70 kDa protein 7	HSPA6;HSPA7	sp|P17066|HSP76_HUMAN Heat shock 70 kDa protein 6 OS=Homo sapiens GN=HSPA6 PE=1 SV=2;sp|P48741|HSP77_HUMAN Putative heat shock 70 kDa protein 7 OS=Homo sapiens GN=HSPA7 PE=5 SV=2	71.027	643	4	3	8	7.6	5.1	13.8	6130500	4649300	24500000	0	0	5	0	0	9.2	0	0	20990000	214910000				134	189;284;523;836;911;912;1126;1763;1925;1984	False;False;False;False;False;False;False;False;False;True	194;293;541;857;937;938;1156;1830;2000;2065	637;638;639;640;641;1000;1878;1879;1880;3540;3541;3542;3543;3544;3545;3546;3981;3982;5064;5065;5066;5067;8324;8958;8959;8960;8961;8962;8963;8964;8965;8966;8967;9298;9299;9300;9301;9302;9303;9304;9305;9306	779;780;781;782;783;784;1198;2283;2284;2285;4637;4638;4639;4640;4641;4642;4643;5249;5250;6796;6797;6798;6799;11276;12070;12071;12072;12073;12074;12075;12076;12077;12078;12079;12667;12668;12669;12670;12671;12672;12673;12674;12675;12676;12677;12678	780;1198;2284;4642;5249;5250;6799;11276;12071;12670
P07437;Q9BVA1;Q13885;Q13509;Q13509-2;Q3ZCM7;A6NNZ2;Q9BUF5;CON__ENSEMBL:ENSBTAP00000025008;Q9H4B7	P07437;Q9BVA1;Q13885;Q13509;Q13509-2;Q3ZCM7;A6NNZ2;Q9BUF5	Tubulin beta chain;Tubulin beta-2B chain;Tubulin beta-2A chain;Tubulin beta-3 chain;Tubulin beta-8 chain;Tubulin beta-8 chain-like protein LOC260334;Tubulin beta-6 chain	TUBB;TUBB2B;TUBB2A;TUBB3;TUBB8;TUBB6	sp|P07437|TBB5_HUMAN Tubulin beta chain OS=Homo sapiens GN=TUBB PE=1 SV=2;sp|Q9BVA1|TBB2B_HUMAN Tubulin beta-2B chain OS=Homo sapiens GN=TUBB2B PE=1 SV=1;sp|Q13885|TBB2A_HUMAN Tubulin beta-2A chain OS=Homo sapiens GN=TUBB2A PE=1 SV=1;sp|Q13509|TBB3_HUMAN T	49.67	444	5	4	6	13.3	10.1	15.1	11988000	9565400	22159000	0	0	0	0	0	0	0	0	0	91134000				100	90;562;872;896;907;1005;1067;1409	True;True;True;True;True;True;True;True	90;581;898;922;933;1032;1096;1468	261;262;263;264;2091;3814;3815;3816;3884;3885;3886;3973;3974;3975;3976;4351;4352;4353;4354;4355;4787;6468	291;292;293;294;2619;4997;4998;4999;5111;5112;5113;5241;5242;5243;5244;5743;5744;5745;5746;5747;6329;8736	294;2619;4998;5111;5242;5747;6329;8736	48		267
P36578	P36578	60S ribosomal protein L4	RPL4	sp|P36578|RL4_HUMAN 60S ribosomal protein L4 OS=Homo sapiens GN=RPL4 PE=1 SV=5	47.697	427	4	1	4	13.8	2.6	11	19017000	3964900	20119000	1	1	1	2.6	2.6	2.6	3664300	1802800	3275800	133540000				182	1;798;799;1278;1340;1437;1438;1523;1574	True;True;True;True;True;True;True;True;True	1;819;820;1316;1393;1497;1498;1586;1638	1;2;3;4;5;6;7;8;9;10;11;3421;3422;5845;6130;6131;6559;6560;6561;6562;6563;6564;6858;6859;6860;7065	1;2;3;4;5;6;7;8;9;10;11;12;13;4509;4510;7990;8347;8348;8837;8838;8839;8840;8841;8842;9202;9203;9204;9457	2;4509;4510;7990;8347;8837;8840;9202;9457	71		284
P04406-2;P04406;O14556	P04406-2;P04406	Glyceraldehyde-3-phosphate dehydrogenase	GAPDH	sp|P04406-2|G3P_HUMAN Isoform 2 of Glyceraldehyde-3-phosphate dehydrogenase OS=Homo sapiens GN=GAPDH;sp|P04406|G3P_HUMAN Glyceraldehyde-3-phosphate dehydrogenase OS=Homo sapiens GN=GAPDH PE=1 SV=3	31.548	293	5	2	3	22.9	10.6	13.3	47191000	15479000	18577000	0	0	0	0	0	0	0	0	0	360080000				84	607;839;1077;1215;1232;1233;2037;2097	True;True;True;True;True;True;True;True	626;861;1106;1248;1265;1266;2118;2183	2309;2310;3554;3555;3556;3557;3558;4801;4802;4803;4804;4805;5679;5680;5681;5723;5724;5725;5726;5727;9424;9425;9630;9631;9632;9633;9634;9635;9636;9637;9638;9639	2976;2977;4651;4652;4653;4654;4655;6343;6344;6345;6346;6347;7813;7814;7815;7858;7859;7860;7861;7862;12801;12802;13032;13033;13034;13035;13036;13037;13038;13039;13040;13041	2976;4653;6343;7814;7858;7859;12801;13039
Q8NI27;Q8NI27-2	Q8NI27	THO complex subunit 2	THOC2	sp|Q8NI27|THOC2_HUMAN THO complex subunit 2 OS=Homo sapiens GN=THOC2 PE=1 SV=2	182.77	1593	0	0	6	0	0	4.6	0	0	18456000	0	0	1	0	0	0.6	0	0	1975200	20432000				341	588;721;1310;1328;1335;1887;1929	True;True;True;True;True;True;True	607;742;1360;1378;1385;1959;2004	2253;2770;6007;6075;6103;8819;8972	2918;3547;8183;8280;8310;11911;12084	2918;3547;8183;8280;8310;11911;12084
Q9GZR7;Q9GZR7-2	Q9GZR7;Q9GZR7-2	ATP-dependent RNA helicase DDX24	DDX24	sp|Q9GZR7|DDX24_HUMAN ATP-dependent RNA helicase DDX24 OS=Homo sapiens GN=DDX24 PE=1 SV=1;sp|Q9GZR7-2|DDX24_HUMAN Isoform 2 of ATP-dependent RNA helicase DDX24 OS=Homo sapiens GN=DDX24	96.331	859	0	0	6	0	0	8.7	0	0	17712000	0	0	1	0	0	1.5	0	0	1196800	168560000				376	225;262;676;762;939;1307;1319;1513;1585;1796;1849;1945	True;True;True;True;True;True;True;True;True;True;True;True	231;270;695;783;965;1357;1369;1576;1649;1864;1919;2023	747;922;923;924;925;2572;2573;2574;2575;3004;3005;3006;3007;3008;4029;6000;6001;6002;6033;6034;6035;6036;6842;7404;7405;7406;7407;8447;8448;8652;9054	910;1119;1120;1121;1122;3297;3298;3299;3300;3890;3891;3892;3893;3894;5303;8176;8177;8178;8215;8216;8217;8218;9185;9941;9942;9943;9944;11428;11429;11647;12176	910;1120;3297;3891;5303;8178;8218;9185;9943;11428;11647;12176
Q71DI3;Q16695;P84243;P68431;Q6NXT2	Q71DI3;Q16695;P84243;P68431;Q6NXT2	Histone H3.2;Histone H3.1t;Histone H3.3;Histone H3.1;Histone H3.3C	HIST2H3A;HIST3H3;H3F3A;HIST1H3A;H3F3C	sp|Q71DI3|H32_HUMAN Histone H3.2 OS=Homo sapiens GN=HIST2H3A PE=1 SV=3;sp|Q16695|H31T_HUMAN Histone H3.1t OS=Homo sapiens GN=HIST3H3 PE=1 SV=3;sp|P84243|H33_HUMAN Histone H3.3 OS=Homo sapiens GN=H3F3A PE=1 SV=2;sp|P68431|H31_HUMAN Histone H3.1 OS=Homo sapi	15.388	136	0	0	1	0	0	5.1	0	0	15493000	0	0	0	0	0	0	0	0	0	29938000				247	388;1760	True;True	401;1827	1385;1386;8317	1667;1668;11269	1668;11269
Q6P2Q9	Q6P2Q9	Pre-mRNA-processing-splicing factor 8	PRPF8	sp|Q6P2Q9|PRP8_HUMAN Pre-mRNA-processing-splicing factor 8 OS=Homo sapiens GN=PRPF8 PE=1 SV=2	273.6	2335	0	0	6	0	0	2.9	0	0	14317000	0	0	4	0	0	2.4	0	0	17313000	31630000				327	368;793;1078;1116;1383;1651;1793;2171	True;True;True;True;True;True;True;True	380;814;1107;1145;1440;1717;1861;2259	1306;1307;3408;4806;4807;5030;6369;7714;8442;9975	1555;1556;4496;6348;6349;6762;8623;10372;11423;13491	1555;4496;6349;6762;8623;10372;11423;13491
P14618;P14618-2;P14618-3;P30613-2;P30613	P14618;P14618-2;P14618-3	Pyruvate kinase PKM	PKM	sp|P14618|KPYM_HUMAN Pyruvate kinase PKM OS=Homo sapiens GN=PKM PE=1 SV=4;sp|P14618-2|KPYM_HUMAN Isoform M1 of Pyruvate kinase PKM OS=Homo sapiens GN=PKM;sp|P14618-3|KPYM_HUMAN Isoform 3 of Pyruvate kinase PKM OS=Homo sapiens GN=PKM	57.936	531	1	5	5	2.4	10	11.9	3098500	14403000	13159000	0	0	0	0	0	0	0	0	0	96853000				126	615;737;914;950;991;1013;1413	True;True;True;True;True;True;True	634;758;940;977;1018;1040;1472	2329;2330;2331;2332;2827;3986;4067;4068;4313;4372;4373;4374;4375;6474;6475;6476;6477;6478;6479	2996;2997;2998;2999;3628;5254;5344;5345;5695;5765;5766;5767;5768;8742;8743;8744;8745;8746;8747	2998;3628;5254;5344;5695;5765;8745
P11021	P11021	78 kDa glucose-regulated protein	HSPA5	sp|P11021|GRP78_HUMAN 78 kDa glucose-regulated protein OS=Homo sapiens GN=HSPA5 PE=1 SV=2	72.332	654	0	0	2	0	0	4	0	0	13081000	0	0	1	0	0	2.4	0	0	9189100	2043200000				114	98;237;282;414;794;804;805;833;835;913;917;970;971;1252;1280;1305;1327;1393;1394;1611;1731;1819;1946;2057;2125;2147	True;True;True;True;True;True;True;True;True;True;True;True;True;True;True;True;True;True;True;True;True;True;True;True;True;True	98;99;243;244;291;428;815;825;826;854;856;939;943;997;998;1286;1318;1355;1377;1450;1451;1675;1797;1887;1888;2024;2139;2212;2235	282;283;284;791;792;793;978;979;980;1480;1481;3409;3410;3435;3436;3521;3522;3523;3524;3525;3526;3527;3528;3536;3537;3538;3539;3983;3984;3985;3989;3990;4153;4154;4155;4156;4157;5795;5796;5847;5995;5996;6073;6074;6407;6408;6409;6410;6411;6412;6413;6414;6415;7553;7554;8157;8551;8552;8553;8554;9055;9056;9057;9058;9495;9735;9736;9737;9738;9739;9829;9830;9831;9832;9833;9834;9835	312;313;314;971;972;973;1176;1177;1178;1791;1792;4497;4498;4529;4530;4616;4617;4618;4619;4620;4621;4622;4623;4632;4633;4634;4635;4636;5251;5252;5253;5257;5258;5259;5482;5483;5484;5485;5486;7940;7941;7992;8171;8172;8278;8279;8663;8664;8665;8666;8667;8668;8669;8670;8671;10169;10170;10999;11542;11543;11544;11545;12177;12178;12179;12180;12888;13149;13150;13151;13152;13153;13253;13254;13255;13256;1325…	313;971;1177;1792;4498;4529;4530;4623;4633;5253;5258;5482;5486;7940;7992;8171;8278;8663;8669;10170;10999;11543;12177;12888;13150;13255	51;52;53		148;196;332
P50502;Q8NFI4;Q8IZP2	P50502;Q8NFI4;Q8IZP2	Hsc70-interacting protein;Putative protein FAM10A5;Putative protein FAM10A4	ST13;ST13P5;ST13P4	sp|P50502|F10A1_HUMAN Hsc70-interacting protein OS=Homo sapiens GN=ST13 PE=1 SV=2;sp|Q8NFI4|F10A5_HUMAN Putative protein FAM10A5 OS=Homo sapiens GN=ST13P5 PE=5 SV=1;sp|Q8IZP2|ST134_HUMAN Putative protein FAM10A4 OS=Homo sapiens GN=ST13P4 PE=5 SV=1	41.331	369	0	0	3	0	0	10.6	0	0	11658000	0	0	1	0	0	3.8	0	0	7976200	267000000				204	84;1023;1459;1955	True;True;True;True	84;1052;1519;1520;2034	244;245;4412;4413;4414;6628;6629;6630;9071;9072;9073;9074	274;275;5811;5812;5813;8926;8927;8928;8929;12193;12194;12195;12196	275;5812;8927;12196	74		28
P81605;P81605-2	P81605;P81605-2	Dermcidin;Survival-promoting peptide;DCD-1	DCD	sp|P81605|DCD_HUMAN Dermcidin OS=Homo sapiens GN=DCD PE=1 SV=2;sp|P81605-2|DCD_HUMAN Isoform 2 of Dermcidin OS=Homo sapiens GN=DCD	11.284	110	3	2	1	22.7	20	10	36027000	33858000	11571000	0	2	1	0	12.7	12.7	0	10620000	0	779370000				252	242;447;448;1060	True;True;True;True	249;462;463;1089	823;824;825;826;827;828;829;830;831;1602;1603;1604;1605;1606;1607;1608;1609;1610;4769;4770;4771;4772;4773;4774;4775;4776;4777;4778	1014;1015;1016;1017;1018;1019;1020;1021;1022;1924;1925;1926;1927;1928;1929;1930;1931;1932;1933;6311;6312;6313;6314;6315;6316;6317;6318;6319;6320	1020;1931;1933;6320
Q06830;P32119;Q13162	Q06830	Peroxiredoxin-1	PRDX1	sp|Q06830|PRDX1_HUMAN Peroxiredoxin-1 OS=Homo sapiens GN=PRDX1 PE=1 SV=1	22.11	199	4	1	3	19.1	5.5	15.6	16719000	3689200	10377000	0	0	0	0	0	0	0	0	0	91198000				268	1241;1493;1774;1835	True;True;True;True	1274;1555;1842;1904	5761;5762;6779;6780;6781;6782;8371;8372;8595;8596;8597;8598;8599	7902;7903;9116;9117;9118;9119;11335;11336;11587;11588;11589;11590;11591	7902;9119;11335;11588
P49207	P49207	60S ribosomal protein L34	RPL34	sp|P49207|RL34_HUMAN 60S ribosomal protein L34 OS=Homo sapiens GN=RPL34 PE=1 SV=3	13.293	117	4	2	2	28.2	14.5	13.7	24818000	8194900	9877100	0	0	0	0	0	0	0	0	0	60318000				200	62;929;1206;1596	True;True;True;True	62;955;1239;1660	183;184;185;4010;4011;5660;5661;5662;5663;5664;7445	210;211;212;5280;5281;7793;7794;7795;7796;7797;10000	210;5280;7793;10000
P07305;P07305-2	P07305;P07305-2	Histone H1.0;Histone H1.0, N-terminally processed	H1F0	sp|P07305|H10_HUMAN Histone H1.0 OS=Homo sapiens GN=H1F0 PE=1 SV=3;sp|P07305-2|H10_HUMAN Isoform 2 of Histone H1.0 OS=Homo sapiens GN=H1F0	20.863	194	2	2	2	11.9	11.9	11.9	13772000	6027100	9718400	0	0	0	0	0	0	0	0	0	33542000				96	734;1817;2011;2223	True;True;True;True	755;1885;2092;2313	2822;8547;8548;8549;9370;9371;9372;9373;10220	3623;11538;11539;11540;12747;12748;12749;12750;13792	3623;11538;12749;13792	47		31
P01859	P01859	Ig gamma-2 chain C region	IGHG2	sp|P01859|IGHG2_HUMAN Ig gamma-2 chain C region OS=Homo sapiens GN=IGHG2 PE=1 SV=2	35.9	326	1	1	1	2.8	2.8	2.8	9155800	5016000	9281300	0	0	0	0	0	0	0	0	0	334420000				74	370	TRUE	382	1310;1311;1312;1313;1314;1315;1316;1317;1318	1559;1560;1561;1562;1563;1564;1565;1566;1567;1568;1569	1569
P83881	P83881	60S ribosomal protein L36a	RPL36A	sp|P83881|RL36A_HUMAN 60S ribosomal protein L36a OS=Homo sapiens GN=RPL36A PE=1 SV=2	12.441	106	4	4	4	37.7	37.7	37.7	10157000	4221900	9169200	2	2	2	20.8	16	16	0	0	0	23548000				254	673;750;1026;1532	True;False;False;False	692;771;1055;1595	2565;2566;2567;2568;2569;2875;2876;2877;2878;2879;4417;4418;4419;4420;4421;4422;4423;4424;4425;6875;6876;6877;6878;6879;6880;6881	3290;3291;3292;3293;3294;3685;3686;3687;3688;3689;3690;3691;5816;5817;5818;5819;5820;5821;5822;5823;5824;5825;5826;9219;9220;9221;9222;9223;9224;9225;9226;9227	3293;3690;5816;9222
P13639	P13639	Elongation factor 2	EEF2	sp|P13639|EF2_HUMAN Elongation factor 2 OS=Homo sapiens GN=EEF2 PE=1 SV=4	95.337	858	3	2	3	3.3	2.1	3.4	6782800	3285600	8483000	0	0	0	0	0	0	0	0	0	1082300000				122	72;173;215;226;360;374;476;585;620;645;660;870;871;1473;1567;1613;1764;1840;1994;2003;2088;2179;2181;2204	True;True;True;True;True;True;True;True;True;True;True;True;True;True;True;True;True;True;True;True;True;True;True;True	72;177;220;232;372;386;492;604;639;664;679;896;897;1535;1631;1679;1831;1909;1910;2075;2084;2174;2267;2269;2293	217;218;219;220;579;580;581;582;583;584;585;586;710;748;1266;1267;1268;1269;1270;1322;1323;1324;1325;1695;1696;1697;2247;2248;2249;2345;2346;2347;2348;2349;2447;2544;2545;3809;3810;3811;3812;3813;6676;6677;6678;7047;7048;7565;7566;7567;8325;8326;8327;8328;8329;8613;8614;8615;9330;9346;9347;9348;9349;9350;9351;9586;9587;9588;9589;9590;9591;9592;10011;10012;10013;10015;10016;10017;10018;10019;10020…	245;246;247;248;249;250;711;712;713;714;715;716;717;718;719;720;721;855;911;1514;1515;1516;1517;1518;1573;1574;1575;1576;1577;1578;2030;2031;2032;2912;2913;2914;3012;3013;3014;3015;3016;3146;3269;3270;4992;4993;4994;4995;4996;8986;8987;8988;9439;9440;10181;10182;10183;11277;11278;11279;11280;11281;11605;11606;11607;12706;12723;12724;12725;12726;12727;12728;12982;12983;12984;12985;12986;12987;1298…	249;721;855;911;1518;1575;2031;2912;3013;3146;3270;4992;4995;8987;9439;10182;11279;11605;12706;12725;12983;13534;13541;13665	56;57		453;454
Q5T749	Q5T749	Keratinocyte proline-rich protein	KPRP	sp|Q5T749|KPRP_HUMAN Keratinocyte proline-rich protein OS=Homo sapiens GN=KPRP PE=1 SV=1	64.135	579	9	1	3	23	2.1	9.5	43709000	2596000	8372000	2	0	0	4	0	0	6787200	0	0	1022300000				323	191;228;583;708;802;1017;1021;1022;1183;1435;1436;1439;1442;1508;1580;1589;1630;1738;1910	True;True;True;True;True;True;True;True;True;True;True;True;True;True;True;True;True;True;True	196;234;602;729;823;1044;1050;1051;1216;1495;1496;1499;1502;1570;1644;1653;1696;1804;1982	643;644;645;750;2241;2242;2243;2244;2245;2696;2697;2698;2699;3428;3429;3430;3431;4381;4409;4410;4411;5259;5260;5261;5262;5263;5264;6555;6556;6557;6558;6565;6566;6571;6820;6821;6822;6823;6824;7337;7338;7339;7340;7341;7342;7343;7344;7345;7416;7417;7618;7619;8172;8173;8893;8894;8895;8896	786;787;788;913;914;2903;2904;2905;2906;2907;2908;2909;2910;3450;3451;3452;3453;4521;4522;4523;4524;4525;5774;5808;5809;5810;7027;7028;7029;7030;7031;7032;8832;8833;8834;8835;8836;8843;8844;8845;8850;9162;9163;9164;9165;9166;9847;9848;9849;9850;9851;9852;9853;9854;9855;9856;9857;9858;9859;9860;9953;9954;9955;10254;10255;11015;11016;11017;11993;11994;11995;11996	786;913;2909;3450;4523;5774;5809;5810;7028;8835;8836;8843;8850;9165;9851;9953;10254;11016;11994
P27708	P27708	CAD protein;Glutamine-dependent carbamoyl-phosphate synthase;Aspartate carbamoyltransferase;Dihydroorotase	CAD	sp|P27708|PYR1_HUMAN CAD protein OS=Homo sapiens GN=CAD PE=1 SV=3	242.98	2225	0	0	4	0	0	2.1	0	0	8346400	8	2	3	4.5	1	2.2	25201000	3534100	8281500	49659000				158	344;558;627;845;1194;1258;2000;2064;2070	True;True;True;True;True;True;True;True;True	356;577;646;870;1227;1293;2081;2146;2152	1190;1191;1192;1193;2084;2362;2363;2364;3743;5318;5812;5813;9339;9340;9522;9523;9524;9525;9532	1416;1417;1418;1419;2612;3033;3034;3035;4921;7132;7957;7958;12716;12717;12915;12916;12917;12918;12925	1418;2612;3034;4921;7132;7957;12716;12916;12925
Q9BZE4;Q9BZE4-3;Q9BZE4-2	Q9BZE4;Q9BZE4-3;Q9BZE4-2	Nucleolar GTP-binding protein 1	GTPBP4	sp|Q9BZE4|NOG1_HUMAN Nucleolar GTP-binding protein 1 OS=Homo sapiens GN=GTPBP4 PE=1 SV=3;sp|Q9BZE4-3|NOG1_HUMAN Isoform 3 of Nucleolar GTP-binding protein 1 OS=Homo sapiens GN=GTPBP4;sp|Q9BZE4-2|NOG1_HUMAN Isoform 2 of Nucleolar GTP-binding protein 1 OS=Ho	73.964	634	0	0	2	0	0	3	0	0	7914100	0	0	0	0	0	0	0	0	0	50055000				375	777;921;1159;1534;1686;1858	True;True;True;True;True;True	798;947;1191;1597;1752;1928	3375;3994;3995;5192;5193;6899;7947;7948;8687	4456;5264;5265;6955;6956;9258;10685;10686;11731	4456;5264;6955;9258;10685;11731
P62750	P62750	60S ribosomal protein L23a	RPL23A	sp|P62750|RL23A_HUMAN 60S ribosomal protein L23a OS=Homo sapiens GN=RPL23A PE=1 SV=1	17.695	156	2	1	2	15.4	8.3	15.4	5815200	3112000	7474000	0	0	0	0	0	0	0	0	0	27756000				232	990;2090	True;True	1017;2176	4308;4309;4310;4311;4312;9594;9595	5690;5691;5692;5693;5694;12990;12991	5694;12991
Q12789-3;Q12789	Q12789-3;Q12789	General transcription factor 3C polypeptide 1	GTF3C1	sp|Q12789-3|TF3C1_HUMAN Isoform 2 of General transcription factor 3C polypeptide 1 OS=Homo sapiens GN=GTF3C1;sp|Q12789|TF3C1_HUMAN General transcription factor 3C polypeptide 1 OS=Homo sapiens GN=GTF3C1 PE=1 SV=4	236.28	2084	0	0	4	0	0	1.8	0	0	7260400	0	0	4	0	0	2.5	0	0	8378700	15639000				280	104;1071;1158;1927;1928;1937;2190	True;True;True;True;True;True;True	105;1100;1190;2002;2003;2013;2278	304;305;4793;5191;8970;8971;9029;10034	336;337;6335;6954;12082;12083;12150;13557	336;6335;6954;12082;12083;12150;13557
Q14839;Q14839-2;Q8TDI0	Q14839;Q14839-2;Q8TDI0	Chromodomain-helicase-DNA-binding protein 4;Chromodomain-helicase-DNA-binding protein 5	CHD4;CHD5	sp|Q14839|CHD4_HUMAN Chromodomain-helicase-DNA-binding protein 4 OS=Homo sapiens GN=CHD4 PE=1 SV=2;sp|Q14839-2|CHD4_HUMAN Isoform 2 of Chromodomain-helicase-DNA-binding protein 4 OS=Homo sapiens GN=CHD4;sp|Q8TDI0|CHD5_HUMAN Chromodomain-helicase-DNA-bindin	218	1912	0	1	4	0	0.7	2.5	0	1755900	7234400	0	0	0	0	0	0	0	0	0	8990300				300	504;759;2012;2157	True;True;True;True	522;780;2093;2245	1799;2998;9374;9375;9876	2165;3879;12751;12752;13315	2165;3879;12752;13315
P52272-2;P52272	P52272-2;P52272	Heterogeneous nuclear ribonucleoprotein M	HNRNPM	sp|P52272-2|HNRPM_HUMAN Isoform 2 of Heterogeneous nuclear ribonucleoprotein M OS=Homo sapiens GN=HNRNPM;sp|P52272|HNRPM_HUMAN Heterogeneous nuclear ribonucleoprotein M OS=Homo sapiens GN=HNRNPM PE=1 SV=3	73.62	691	0	0	3	0	0	5.2	0	0	6802100	0	0	0	0	0	0	0	0	0	10933000				209	32;692;874;1269;2017	True;True;True;True;True	32;711;900;1306;2098	72;73;2619;3818;5830;9386	75;76;3344;5001;7975;12763	75;3344;5001;7975;12763
Q15233-2;Q15233	Q15233-2;Q15233	Non-POU domain-containing octamer-binding protein	NONO	sp|Q15233-2|NONO_HUMAN Isoform 2 of Non-POU domain-containing octamer-binding protein OS=Homo sapiens GN=NONO;sp|Q15233|NONO_HUMAN Non-POU domain-containing octamer-binding protein OS=Homo sapiens GN=NONO PE=1 SV=4	43.866	382	0	0	3	0	0	9.2	0	0	6517900	0	0	1	0	0	3.1	0	0	3045100	21005000				306	17;508;537;671;1985	True;True;True;True;True	17;526;556;690;2066	35;36;1816;1967;2562;2563;9307;9308	38;39;2184;2376;3287;3288;12679;12680	39;2184;2376;3288;12680
P62910	P62910	60S ribosomal protein L32	RPL32	sp|P62910|RL32_HUMAN 60S ribosomal protein L32 OS=Homo sapiens GN=RPL32 PE=1 SV=2	15.86	135	3	2	2	28.1	17	18.5	29936000	5095000	6452000	0	0	0	0	0	0	0	0	0	99441000				238	20;416;702;1782	True;True;True;True	20;430;431;721;1850	39;1486;1487;1488;1489;2659;2660;8386;8387;8388;8389;8390;8391;8392	42;1797;1798;1799;1800;3396;3397;11350;11351;11352;11353;11354;11355;11356;11357	42;1800;3396;11350	80		90
Q00839-2;Q00839	Q00839-2;Q00839	Heterogeneous nuclear ribonucleoprotein U	HNRNPU	sp|Q00839-2|HNRPU_HUMAN Isoform Short of Heterogeneous nuclear ribonucleoprotein U OS=Homo sapiens GN=HNRNPU;sp|Q00839|HNRPU_HUMAN Heterogeneous nuclear ribonucleoprotein U OS=Homo sapiens GN=HNRNPU PE=1 SV=6	88.979	806	2	0	2	3.3	0	4.1	4688600	0	6413200	0	0	1	0	0	1.9	0	0	1809200	1356300000				258	210;256;274;401;541;746;747;1111;1155;1162;1163;1261;1330;1333;1510;1582;1747;1753;2123;2212	True;True;True;True;True;True;True;True;True;True;True;True;True;True;True;True;True;True;True;True	215;264;282;415;560;767;768;1140;1187;1194;1195;1196;1297;1380;1383;1572;1573;1646;1813;1819;2210;2301;2302	695;890;891;892;953;1435;1436;1437;1972;2850;2851;2852;2853;2854;2855;2856;2857;2858;2859;2860;2861;2862;2863;5017;5018;5019;5020;5021;5022;5184;5185;5186;5200;5201;5202;5203;5204;5205;5206;5207;5208;5820;6081;6082;6083;6084;6085;6086;6087;6088;6089;6090;6091;6092;6093;6094;6101;6826;6827;6828;7348;8244;8245;8246;8247;8248;8249;8250;8251;8285;9729;9730;10186;10187;10188;10189;10190;10191	839;1086;1087;1088;1151;1740;1741;1742;2381;3655;3656;3657;3658;3659;3660;3661;3662;3663;3664;3665;3666;3667;3668;3669;3670;3671;6749;6750;6751;6752;6753;6754;6946;6947;6948;6963;6964;6965;6966;6967;6968;6969;6970;6971;6972;7965;8286;8287;8288;8289;8290;8291;8292;8293;8294;8295;8296;8297;8298;8299;8300;8301;8308;9169;9170;9171;9863;11143;11144;11145;11146;11147;11148;11149;11150;11151;11235;13143…	839;1086;1151;1740;2381;3657;3661;6749;6946;6963;6969;7965;8287;8308;9171;9863;11144;11235;13143;13761	81;82;83		53;515;527
Q13263-2;Q13263	Q13263-2;Q13263	Transcription intermediary factor 1-beta	TRIM28	sp|Q13263-2|TIF1B_HUMAN Isoform 2 of Transcription intermediary factor 1-beta OS=Homo sapiens GN=TRIM28;sp|Q13263|TIF1B_HUMAN Transcription intermediary factor 1-beta OS=Homo sapiens GN=TRIM28 PE=1 SV=5	79.473	753	0	0	2	0	0	6.8	0	0	6379100	0	0	1	0	0	2.7	0	0	1705800	131650000				284	21;22;924;1014;1196;1211;1644;2080	True;True;True;True;True;True;True;True	21;22;950;1041;1229;1244;1710;2162	40;41;42;43;44;45;46;3999;4000;4001;4002;4003;4004;4376;4377;5320;5670;7668;7669;9551	43;44;45;46;47;48;49;5269;5270;5271;5272;5273;5274;5769;5770;7134;7804;10304;10305;12944	45;49;5269;5770;7134;7804;10304;12944
O14523;O14523-2	O14523;O14523-2	C2 domain-containing protein 2-like	C2CD2L	sp|O14523|C2C2L_HUMAN C2 domain-containing protein 2-like OS=Homo sapiens GN=C2CD2L PE=1 SV=3;sp|O14523-2|C2C2L_HUMAN Isoform 2 of C2 domain-containing protein 2-like OS=Homo sapiens GN=C2CD2L	76.18	706	1	1	1	1.4	1.4	1.4	4911100	5973800	6233800	0	0	1	0	0	1.4	0	0	22179000	132390000				45	1020	TRUE	1049	4402;4403;4404;4405;4406;4407;4408	5799;5800;5801;5802;5803;5804;5805;5806;5807	5799
Q02413;Q02413-2	Q02413	Desmoglein-1	DSG1	sp|Q02413|DSG1_HUMAN Desmoglein-1 OS=Homo sapiens GN=DSG1 PE=1 SV=2	113.75	1049	5	2	2	7.4	3.1	3.1	21101000	5626300	6233700	2	1	0	3.1	1.8	0	4524000	3059300	0	403590000				263	124;445;459;469;821;838;901;1297;1468;1595;1869;1912;1953;1954;2006;2021;2219;2235	True;True;True;True;True;True;True;True;True;True;True;True;True;True;True;True;True;True	126;127;460;475;485;842;860;927;1343;1344;1529;1530;1659;1940;1984;1985;2031;2032;2033;2087;2102;2309;2325;2326	378;379;1599;1600;1655;1656;1674;1675;3482;3483;3484;3485;3486;3487;3488;3553;3931;5960;5961;6652;6653;6654;7444;8739;8740;8741;8898;8899;8900;9067;9068;9069;9070;9354;9355;9356;9357;9358;9359;9360;9361;9362;9395;9396;10203;10204;10205;10206;10243;10244;10245;10246;10247	444;445;1920;1921;1922;1983;1984;2003;2004;4577;4578;4579;4580;4581;4582;4583;4650;5191;8131;8132;8952;8953;8954;9999;11792;11793;11794;11999;12000;12001;12189;12190;12191;12192;12731;12732;12733;12734;12735;12736;12737;12738;12739;12772;12773;13775;13776;13777;13778;13815;13816;13817;13818;13819;13820;13821	444;1920;1984;2003;4579;4650;5191;8132;8953;9999;11794;12000;12191;12192;12731;12772;13775;13819	84;85;86;87;88;89;90;91		133;208;221;398;425;455;651;665
Q14690	Q14690	Protein RRP5 homolog	PDCD11	sp|Q14690|RRP5_HUMAN Protein RRP5 homolog OS=Homo sapiens GN=PDCD11 PE=1 SV=3	208.7	1871	0	1	2	0	0.8	1.4	0	1359400	5625300	0	1	1	0	0.8	0.6	0	1205300	0	34373000				297	91;960;1913;2131;2144;2191	True;True;True;True;True;True	91;987;1986;2219;2232;2279	265;266;267;4096;4097;4098;4099;4100;8901;9788;9789;9823;9824;10035;10036	295;296;297;5390;5391;5392;5393;5394;12002;13211;13212;13247;13248;13558;13559	296;5391;12002;13212;13247;13558
P06733;P06733-2	P06733;P06733-2	Alpha-enolase	ENO1	sp|P06733|ENOA_HUMAN Alpha-enolase OS=Homo sapiens GN=ENO1 PE=1 SV=2;sp|P06733-2|ENOA_HUMAN Isoform MBP-1 of Alpha-enolase OS=Homo sapiens GN=ENO1	47.168	434	2	2	1	5.1	4.1	2.3	10345000	5333400	5624600	0	0	0	0	0	0	0	0	0	73284000				92	811;1156;2200	True;True;True	832;1188;2289	3450;3451;3452;3453;3454;5187;10102;10103;10104	4545;4546;4547;4548;4549;6949;13650;13651;13652	4549;6949;13652
P83731	P83731	60S ribosomal protein L24	RPL24	sp|P83731|RL24_HUMAN 60S ribosomal protein L24 OS=Homo sapiens GN=RPL24 PE=1 SV=1	17.779	157	3	1	1	19.1	5.1	5.1	10647000	2986200	5591900	0	0	1	0	0	5.1	0	0	1458900	20684000				253	96;1486;2001	True;True;True	96;1548;2082	278;6725;9341;9342;9343;9344	308;9042;12718;12719;12720;12721	308;9042;12719
P06702	P06702	Protein S100-A9	S100A9	sp|P06702|S10A9_HUMAN Protein S100-A9 OS=Homo sapiens GN=S100A9 PE=1 SV=1	13.242	114	0	0	1	0	0	11.4	0	0	5433500	0	0	0	0	0	0	0	0	0	115220000				91	1057;1339;2024	True;True;True	1086;1392;2105	4746;4747;4748;4749;4750;4751;4752;6128;6129;9401	6283;6284;6285;6286;6287;6288;6289;8345;8346;12778	6285;8346;12778	46		63
P0DN26;A0A0B4J2A2;A0A075B759;Q9Y536;F5H284;P62937	P0DN26;A0A0B4J2A2;A0A075B759;Q9Y536;F5H284;P62937	Peptidyl-prolyl cis-trans isomerase;Peptidyl-prolyl cis-trans isomerase A-like 4A/B/C;Peptidyl-prolyl cis-trans isomerase A-like 4D;Peptidyl-prolyl cis-trans isomerase A;Peptidyl-prolyl cis-trans isomerase A, N-terminally processed	PPIAL4C;PPIAL4E;PPIAL4A;PPIAL4D;PPIA	sp|P0DN26|PAL4F_HUMAN Peptidyl-prolyl cis-trans isomerase A-like 4F OS=Homo sapiens GN=PPIAL4F PE=3 SV=1;sp|A0A0B4J2A2|PAL4C_HUMAN Peptidyl-prolyl cis-trans isomerase A-like 4C OS=Homo sapiens GN=PPIAL4C PE=2 SV=1;sp|A0A075B759|PAL4E_HUMAN Peptidyl-prolyl	18.197	164	1	1	1	8.5	8.5	8.5	3081700	3187000	5409300	0	0	0	0	0	0	0	0	0	27839000				1	837	TRUE	858;859	3547;3548;3549;3550;3551;3552	4644;4645;4646;4647;4648;4649	4644	0		61
P23246;P23246-2	P23246;P23246-2	Splicing factor, proline- and glutamine-rich	SFPQ	sp|P23246|SFPQ_HUMAN Splicing factor, proline- and glutamine-rich OS=Homo sapiens GN=SFPQ PE=1 SV=2;sp|P23246-2|SFPQ_HUMAN Isoform Short of Splicing factor, proline- and glutamine-rich OS=Homo sapiens GN=SFPQ	76.149	707	0	0	2	0	0	4.2	0	0	5251900	0	0	1	0	0	2.4	0	0	4809800	85071000				147	507;513;538;670;1050;1441	True;True;True;True;True;True	525;531;557;689;1079;1501	1815;1839;1840;1841;1842;1968;2560;2561;4504;4505;4506;4507;4508;6570	2183;2215;2216;2217;2218;2377;3285;3286;5926;5927;5928;5929;5930;8849	2183;2216;2377;3285;5926;8849
P60174-1;P60174;P60174-4	P60174-1;P60174;P60174-4	Triosephosphate isomerase	TPI1	sp|P60174-1|TPIS_HUMAN Isoform 2 of Triosephosphate isomerase OS=Homo sapiens GN=TPI1;sp|P60174|TPIS_HUMAN Triosephosphate isomerase OS=Homo sapiens GN=TPI1 PE=1 SV=3;sp|P60174-4|TPIS_HUMAN Isoform 4 of Triosephosphate isomerase OS=Homo sapiens GN=TPI1	26.669	249	2	3	2	10.4	14.5	10.4	6821700	5307700	4867800	0	0	0	0	0	0	0	0	0	32795000				222	785;842;1798	True;True;True	806;866;1866	3386;3696;3697;3698;3699;3700;8451;8452;8453;8454	4467;4840;4841;4842;4843;4844;11432;11433;11434;11435	4467;4843;11432
P62753	P62753	40S ribosomal protein S6	RPS6	sp|P62753|RS6_HUMAN 40S ribosomal protein S6 OS=Homo sapiens GN=RPS6 PE=1 SV=1	28.68	249	4	3	2	18.1	13.7	8.8	17098000	6209200	4864400	0	0	1	0	0	4.8	0	0	1705600	43554000				233	258;1072;1150;1260;1343	True;True;True;True;True	266;1101;1182;1296;1397	905;906;907;908;909;4794;4795;5174;5175;5176;5819;6138;6139;6140	1102;1103;1104;1105;1106;6336;6337;6936;6937;6938;7964;8355;8356;8357	1102;6337;6936;7964;8355
P26373;P26373-2	P26373;P26373-2	60S ribosomal protein L13	RPL13	sp|P26373|RL13_HUMAN 60S ribosomal protein L13 OS=Homo sapiens GN=RPL13 PE=1 SV=4;sp|P26373-2|RL13_HUMAN Isoform 2 of 60S ribosomal protein L13 OS=Homo sapiens GN=RPL13	24.261	211	2	1	2	10.4	5.2	11.4	2411300	1246300	4821700	0	0	1	0	0	5.2	0	0	924300	12373000				154	336;1003;1761	True;True;True	348;1030;1828	1166;4348;4349;8318;8319;8320;8321;8322	1391;5740;5741;11270;11271;11272;11273;11274	1391;5741;11273
P00338;P00338-3;P00338-5;P00338-2;P00338-4;Q6ZMR3;P07864	P00338;P00338-3;P00338-5;P00338-2;P00338-4	L-lactate dehydrogenase A chain	LDHA	sp|P00338|LDHA_HUMAN L-lactate dehydrogenase A chain OS=Homo sapiens GN=LDHA PE=1 SV=2;sp|P00338-3|LDHA_HUMAN Isoform 3 of L-lactate dehydrogenase A chain OS=Homo sapiens GN=LDHA;sp|P00338-5|LDHA_HUMAN Isoform 5 of L-lactate dehydrogenase A chain OS=Homo s	36.688	332	1	1	1	3	3	3	3516900	3636200	4477200	0	0	0	0	0	0	0	0	0	55060000				70	927;2027;2128	True;True;True	953;2108;2215	4008;9405;9406;9746;9747;9748;9749;9750;9751	5278;12782;12783;13160;13161;13162;13163;13164;13165	5278;12783;13163
P11387	P11387	DNA topoisomerase 1	TOP1	sp|P11387|TOP1_HUMAN DNA topoisomerase 1 OS=Homo sapiens GN=TOP1 PE=1 SV=2	90.725	765	0	0	1	0	0	1.6	0	0	4262700	0	0	1	0	0	1.6	0	0	1842900	32145000				116	436;1041;1643	True;True;True	451;1070;1709	1562;4468;4469;4470;4471;7665;7666;7667	1877;5884;5885;5886;5887;10301;10302;10303	1877;5885;10301
P50914	P50914	60S ribosomal protein L14	RPL14	sp|P50914|RL14_HUMAN 60S ribosomal protein L14 OS=Homo sapiens GN=RPL14 PE=1 SV=4	23.432	215	1	1	2	5.6	5.6	10.7	3015300	1573600	4035700	0	1	0	0	5.6	0	0	952320	0	25323000				205	135;1225	True;True	138;1258	395;396;397;5707;5708;5709;5710;5711;5712;5713;5714	461;462;463;7842;7843;7844;7845;7846;7847;7848;7849	461;7845
P68371;P04350	P68371;P04350	Tubulin beta-4B chain;Tubulin beta-4A chain	TUBB4B;TUBB4A	sp|P68371|TBB4B_HUMAN Tubulin beta-4B chain OS=Homo sapiens GN=TUBB4B PE=1 SV=1;sp|P04350|TBB4A_HUMAN Tubulin beta-4A chain OS=Homo sapiens GN=TUBB4A PE=1 SV=2	49.83	445	5	3	5	13.7	6.7	12.8	3797000	0	3910700	0	0	0	0	0	0	0	0	0	36805000				245	399;562;872;881;896;1005;1067;1409	True;False;False;True;False;False;False;False	413;581;898;907;922;1032;1096;1468	1430;1431;1432;1433;2091;3814;3815;3816;3835;3836;3837;3884;3885;3886;4351;4352;4353;4354;4355;4787;6468	1735;1736;1737;1738;2619;4997;4998;4999;5018;5019;5020;5111;5112;5113;5743;5744;5745;5746;5747;6329;8736	1738;2619;4998;5019;5111;5747;6329;8736	48		267
Q02543	Q02543	60S ribosomal protein L18a	RPL18A	sp|Q02543|RL18A_HUMAN 60S ribosomal protein L18a OS=Homo sapiens GN=RPL18A PE=1 SV=2	20.762	176	3	1	2	17.6	5.7	13.1	9951000	2500700	3845300	0	0	0	0	0	0	0	0	0	27731000				264	277;806;1983	True;True;True	285;827;2064	956;957;958;959;960;3437;3438;3439;9297	1154;1155;1156;1157;1158;4531;4532;4533;12666	1155;4531;12666
P46781	P46781	40S ribosomal protein S9	RPS9	sp|P46781|RS9_HUMAN 40S ribosomal protein S9 OS=Homo sapiens GN=RPS9 PE=1 SV=3	22.591	194	2	1	1	8.2	4.6	4.6	7471000	1720300	3836900	0	0	0	0	0	0	0	0	0	21263000				198	796;1045	True;True	817;1074	3419;4475;4476;4477;4478;4479;4480	4507;5891;5892;5893;5894;5895;5896	4507;5894
P62826	P62826	GTP-binding nuclear protein Ran	RAN	sp|P62826|RAN_HUMAN GTP-binding nuclear protein Ran OS=Homo sapiens GN=RAN PE=1 SV=3	24.423	216	0	0	1	0	0	5.1	0	0	3523300	0	0	0	0	0	0	0	0	0	38491000				235	1234;1363	True;True	1267;1417	5728;5729;5730;5731;5732;6274	7863;7864;7865;7866;7867;8513	7865;8513
Q96L21;P27635	Q96L21;P27635	60S ribosomal protein L10-like;60S ribosomal protein L10	RPL10L;RPL10	sp|Q96L21|RL10L_HUMAN 60S ribosomal protein L10-like OS=Homo sapiens GN=RPL10L PE=1 SV=3;sp|P27635|RL10_HUMAN 60S ribosomal protein L10 OS=Homo sapiens GN=RPL10 PE=1 SV=4	24.519	214	0	0	1	0	0	5.6	0	0	3452200	0	0	0	0	0	0	0	0	0	9167000				157	603	TRUE	622	2297;2298;2299	2964;2965;2966	2964
P29401;P29401-2	P29401;P29401-2	Transketolase	TKT	sp|P29401|TKT_HUMAN Transketolase OS=Homo sapiens GN=TKT PE=1 SV=3;sp|P29401-2|TKT_HUMAN Isoform 2 of Transketolase OS=Homo sapiens GN=TKT	67.877	623	0	1	1	0	1.9	1.9	0	1504800	3310900	0	0	0	0	0	0	0	0	0	16297000				162	823;847;1917;2054	True;True;True;True	844;872;1991;2136	3498;3746;8932;8933;9488;9489	4593;4924;12044;12045;12881;12882	4593;4924;12045;12882
Q5JTH9-2;Q5JTH9-3;Q5JTH9	Q5JTH9-2;Q5JTH9-3;Q5JTH9	RRP12-like protein	RRP12	sp|Q5JTH9-2|RRP12_HUMAN Isoform 2 of RRP12-like protein OS=Homo sapiens GN=RRP12;sp|Q5JTH9-3|RRP12_HUMAN Isoform 3 of RRP12-like protein OS=Homo sapiens GN=RRP12;sp|Q5JTH9|RRP12_HUMAN RRP12-like protein OS=Homo sapiens GN=RRP12 PE=1 SV=2	132.71	1197	0	0	2	0	0	1.6	0	0	3287600	0	0	1	0	0	0.8	0	0	1902300	22952000				320	709;2048;2053;2133	True;True;True;True	730;2130;2135;2221	2700;9453;9454;9455;9485;9486;9487;9792	3454;12830;12831;12832;12878;12879;12880;13215	3454;12830;12879;13215
Q92598-2;Q92598;Q92598-3;Q92598-4;O95757	Q92598-2;Q92598;Q92598-3;Q92598-4	Heat shock protein 105 kDa	HSPH1	sp|Q92598-2|HS105_HUMAN Isoform Beta of Heat shock protein 105 kDa OS=Homo sapiens GN=HSPH1;sp|Q92598|HS105_HUMAN Heat shock protein 105 kDa OS=Homo sapiens GN=HSPH1 PE=1 SV=1;sp|Q92598-3|HS105_HUMAN Isoform 3 of Heat shock protein 105 kDa OS=Homo sapiens	92.115	814	0	0	2	0	0	3.3	0	0	3248000	0	0	3	0	0	4.1	0	0	5612500	119110000				349	70;260;563;597;1083;1267;1277;1457;1575;2063	True;True;True;True;True;True;True;True;True;True	70;268;582;616;1112;1304;1315;1517;1639;2145	213;214;914;915;916;917;918;919;920;2092;2093;2282;2283;2284;2285;4875;4876;5828;5844;6622;6623;6624;7066;9519;9520;9521	241;242;1111;1112;1113;1114;1115;1116;1117;2620;2621;2948;2949;2950;2951;6498;6499;7973;7989;8920;8921;8922;9458;12912;12913;12914	241;1117;2621;2948;6499;7973;7989;8920;9458;12912
P00558-2;P00558	P00558-2;P00558	Phosphoglycerate kinase 1	PGK1	sp|P00558-2|PGK1_HUMAN Isoform 2 of Phosphoglycerate kinase 1 OS=Homo sapiens GN=PGK1;sp|P00558|PGK1_HUMAN Phosphoglycerate kinase 1 OS=Homo sapiens GN=PGK1 PE=1 SV=3	41.428	389	0	0	2	0	0	9	0	0	3214900	0	0	0	0	0	0	0	0	0	3214900				71	115;915	True;True	116;941	349;3987	415;5255	415;5255
O00148;Q13838;Q13838-2	O00148;Q13838;Q13838-2	ATP-dependent RNA helicase DDX39A;Spliceosome RNA helicase DDX39B	DDX39A;DDX39B	sp|O00148|DX39A_HUMAN ATP-dependent RNA helicase DDX39A OS=Homo sapiens GN=DDX39A PE=1 SV=2;sp|Q13838|DX39B_HUMAN Spliceosome RNA helicase DDX39B OS=Homo sapiens GN=DDX39B PE=1 SV=1;sp|Q13838-2|DX39B_HUMAN Isoform 2 of Spliceosome RNA helicase DDX39B OS=Ho	49.129	427	1	0	1	2.3	0	2.3	1246900	0	3173900	0	0	0	0	0	0	0	0	0	8225200				42	867	TRUE	893	3804;3805;3806	4986;4987;4988;4989	4989
P04075;P04075-2	P04075;P04075-2	Fructose-bisphosphate aldolase A	ALDOA	sp|P04075|ALDOA_HUMAN Fructose-bisphosphate aldolase A OS=Homo sapiens GN=ALDOA PE=1 SV=2;sp|P04075-2|ALDOA_HUMAN Isoform 2 of Fructose-bisphosphate aldolase A OS=Homo sapiens GN=ALDOA	39.42	364	2	0	2	7.1	0	5.8	8078700	0	3127900	0	0	0	0	0	0	0	0	0	42897000				80	19;103;128;434;664;1175;1444	True;True;True;True;True;True;True	19;104;131;449;683;1208;1504	38;302;303;384;1557;2550;2551;2552;5232;5233;6577;6578	41;334;335;450;1872;3275;3276;3277;7000;7001;8856;8857	41;334;450;1872;3275;7001;8856
P60842;Q14240;Q14240-2;P60842-2	P60842;Q14240;Q14240-2;P60842-2	Eukaryotic initiation factor 4A-I;Eukaryotic initiation factor 4A-II;Eukaryotic initiation factor 4A-II, N-terminally processed	EIF4A1;EIF4A2	sp|P60842|IF4A1_HUMAN Eukaryotic initiation factor 4A-I OS=Homo sapiens GN=EIF4A1 PE=1 SV=1;sp|Q14240|IF4A2_HUMAN Eukaryotic initiation factor 4A-II OS=Homo sapiens GN=EIF4A2 PE=1 SV=2;sp|Q14240-2|IF4A2_HUMAN Isoform 2 of Eukaryotic initiation factor 4A-II	46.153	406	0	0	1	0	0	2.5	0	0	3075300	0	0	0	0	0	0	0	0	0	7736200				224	745;2065	True;True	766;2147	2849;9526	3654;12919	3654;12919
Q14103-4;Q14103-3;Q14103-2;Q14103	Q14103-4;Q14103-3;Q14103-2;Q14103	Heterogeneous nuclear ribonucleoprotein D0	HNRNPD	sp|Q14103-4|HNRPD_HUMAN Isoform 4 of Heterogeneous nuclear ribonucleoprotein D0 OS=Homo sapiens GN=HNRNPD;sp|Q14103-3|HNRPD_HUMAN Isoform 3 of Heterogeneous nuclear ribonucleoprotein D0 OS=Homo sapiens GN=HNRNPD;sp|Q14103-2|HNRPD_HUMAN Isoform 2 of Heterog	30.672	287	0	0	1	0	0	4.9	0	0	3027700	0	0	0	0	0	0	0	0	0	12638000				288	810	TRUE	831	3447;3448;3449	4542;4543;4544	4544
Q92616	Q92616	Translational activator GCN1	GCN1L1	sp|Q92616|GCN1_HUMAN eIF-2-alpha kinase activator GCN1 OS=Homo sapiens GN=GCN1 PE=1 SV=6	292.75	2671	0	0	3	0	0	1.8	0	0	2997700	4	0	0	1.6	0	0	4606800	0	0	7604500				350	6;354;384;1140;1219;1254;1449	True;True;True;True;True;True;True	6;366;397;1172;1252;1288;1509	18;1236;1371;5122;5694;5801;6583	20;1483;1642;6873;7829;7946;8862	20;1483;1642;6873;7829;7946;8862
Q02878	Q02878	60S ribosomal protein L6	RPL6	sp|Q02878|RL6_HUMAN 60S ribosomal protein L6 OS=Homo sapiens GN=RPL6 PE=1 SV=3	32.728	288	4	0	1	13.2	0	2.8	20926000	0	2935100	0	0	0	0	0	0	0	0	0	84438000				265	94;589;2049;2169;2237	True;True;True;True;True	94;608;2131;2257;2328	272;2254;2255;9456;9457;9458;9459;9972;10254;10255;10256;10257	302;2919;2920;12833;12834;12835;12836;13488;13828;13829;13830;13831	302;2919;12834;13488;13829
P08670	P08670	Vimentin	VIM	sp|P08670|VIME_HUMAN Vimentin OS=Homo sapiens GN=VIM PE=1 SV=4	53.651	466	1	1	3	1.5	1.5	5.8	0	0	2905800	1	0	0	1.5	0	0	0	0	0	18693000				107	502;550;854;1052;1106;1703	True;False;True;True;True;True	520;569;879;1081;1135;1769	1795;1796;1797;2029;2030;2031;2032;2033;2034;2035;3755;4510;5011;8089	2161;2162;2163;2530;2531;2532;2533;2534;2535;2536;4933;5932;6743;10929	2162;2535;4933;5932;6743;10929
P22392;P15531;P15531-2;P22392-2;O60361	P22392;P15531;P15531-2;P22392-2;O60361	Nucleoside diphosphate kinase B;Nucleoside diphosphate kinase A;Putative nucleoside diphosphate kinase	NME2;NME1;NME2P1	sp|P22392|NDKB_HUMAN Nucleoside diphosphate kinase B OS=Homo sapiens GN=NME2 PE=1 SV=1;sp|P15531|NDKA_HUMAN Nucleoside diphosphate kinase A OS=Homo sapiens GN=NME1 PE=1 SV=1;sp|P15531-2|NDKA_HUMAN Isoform 2 of Nucleoside diphosphate kinase A OS=Homo sapien	17.298	152	0	0	1	0	0	7.9	0	0	2903700	0	0	0	0	0	0	0	0	0	13802000				130	1824;2087	True;True	1893;2173	8564;8565;9584;9585	11556;11557;12980;12981	11557;12981
P39748;P39748-2	P39748;P39748-2	Flap endonuclease 1	FEN1	sp|P39748|FEN1_HUMAN Flap endonuclease 1 OS=Homo sapiens GN=FEN1 PE=1 SV=1;sp|P39748-2|FEN1_HUMAN Isoform FENMIT of Flap endonuclease 1 OS=Homo sapiens GN=FEN1	42.592	380	0	0	1	0	0	2.9	0	0	2871800	0	0	0	0	0	0	0	0	0	6758700				187	1068;1507	True;True	1097;1569	4788;4789;6819	6330;6331;9161	6330;9161
Q14684-2;Q14684	Q14684-2;Q14684	Ribosomal RNA processing protein 1 homolog B	RRP1B	sp|Q14684-2|RRP1B_HUMAN Isoform 2 of Ribosomal RNA processing protein 1 homolog B OS=Homo sapiens GN=RRP1B;sp|Q14684|RRP1B_HUMAN Ribosomal RNA processing protein 1 homolog B OS=Homo sapiens GN=RRP1B PE=1 SV=3	82.175	740	0	0	1	0	0	1.5	0	0	2791000	0	0	0	0	0	0	0	0	0	51423000				296	720;1663;1756;1895;2007	True;True;True;True;True	741;1729;1822;1967;2088	2768;2769;7819;8291;8292;8293;8843;9363;9364	3545;3546;10500;11241;11242;11243;11936;12740;12741	3546;10500;11243;11936;12740
P18124	P18124	60S ribosomal protein L7	RPL7	sp|P18124|RL7_HUMAN 60S ribosomal protein L7 OS=Homo sapiens GN=RPL7 PE=1 SV=1	29.225	248	0	0	1	0	0	4.4	0	0	2774100	0	0	0	0	0	0	0	0	0	15605000				138	779	TRUE	800	3377;3378;3379	4458;4459;4460	4458
Q15185-2;Q15185-3;Q15185-4;Q15185	Q15185-2;Q15185-3;Q15185-4;Q15185	Prostaglandin E synthase 3	PTGES3	sp|Q15185-2|TEBP_HUMAN Isoform 2 of Prostaglandin E synthase 3 OS=Homo sapiens GN=PTGES3;sp|Q15185-3|TEBP_HUMAN Isoform 3 of Prostaglandin E synthase 3 OS=Homo sapiens GN=PTGES3;sp|Q15185-4|TEBP_HUMAN Isoform 4 of Prostaglandin E synthase 3 OS=Homo sapiens	14.844	127	0	0	1	0	0	10.2	0	0	2675000	0	0	0	0	0	0	0	0	0	10253000				305	1214	TRUE	1247	5677;5678	7811;7812	7812
P15924;P15924-3;P15924-2	P15924;P15924-3;P15924-2	Desmoplakin	DSP	sp|P15924|DESP_HUMAN Desmoplakin OS=Homo sapiens GN=DSP PE=1 SV=3;sp|P15924-3|DESP_HUMAN Isoform DSPIa of Desmoplakin OS=Homo sapiens GN=DSP;sp|P15924-2|DESP_HUMAN Isoform DPII of Desmoplakin OS=Homo sapiens GN=DSP	331.77	2871	10	2	2	3.7	0.7	0.7	31666000	3269700	2669500	2	0	0	0.6	0	0	4574400	0	0	523810000				131	51;165;474;532;547;803;916;926;996;1028;1084;1099;1130;1145;1160;1176;1222;1223;1390;1418;1503;1506;1526;1557;1616;1735;1851;1868;2104;2132;2178;2183;2197;2216	True;True;True;True;True;True;True;True;True;True;True;True;True;True;True;True;True;True;True;True;True;True;True;True;True;True;True;True;True;True;True;True;True;True	51;169;490;551;566;824;942;952;1023;1057;1113;1128;1160;1177;1192;1209;1255;1256;1447;1477;1565;1568;1589;1621;1682;1801;1921;1938;1939;2190;2220;2266;2271;2286;2306	148;149;535;536;537;538;539;1689;1690;1691;1692;1949;2023;2024;2025;3432;3433;3434;3988;4006;4007;4321;4428;4877;4975;4976;5075;5076;5164;5165;5166;5167;5194;5195;5196;5197;5234;5235;5236;5237;5701;5702;5703;6394;6395;6396;6397;6398;6399;6490;6491;6806;6807;6813;6814;6815;6816;6817;6818;6863;6864;6865;7019;7020;7021;7022;7574;8166;8167;8168;8169;8654;8655;8735;8736;8737;8738;9668;9790;9791;10006;…	171;172;643;644;645;646;647;2024;2025;2026;2027;2358;2524;2525;2526;4526;4527;4528;5256;5276;5277;5704;5829;6500;6699;6700;6807;6808;6926;6927;6928;6929;6957;6958;6959;6960;7002;7003;7004;7005;7836;7837;7838;8650;8651;8652;8653;8654;8655;8758;8759;9147;9148;9155;9156;9157;9158;9159;9160;9207;9208;9209;9410;9411;9412;9413;10195;11009;11010;11011;11012;11649;11650;11788;11789;11790;11791;13078;1321…	172;647;2026;2358;2525;4528;5256;5276;5704;5829;6500;6699;6807;6929;6957;7003;7836;7838;8650;8758;9147;9160;9207;9410;10195;11012;11649;11790;13078;13213;13530;13545;13637;13771	61		984
Q08554-2;Q08554	Q08554-2;Q08554	Desmocollin-1	DSC1	sp|Q08554-2|DSC1_HUMAN Isoform 1B of Desmocollin-1 OS=Homo sapiens GN=DSC1;sp|Q08554|DSC1_HUMAN Desmocollin-1 OS=Homo sapiens GN=DSC1 PE=1 SV=2	93.834	840	3	2	1	4.6	3.5	1.8	10861000	4686100	2668700	2	0	0	3.5	0	0	6890400	0	0	362450000				274	311;795;826;859;2120;2126	True;True;True;True;True;True	320;816;847;885;2207;2213	1061;1062;1063;3411;3412;3413;3414;3415;3416;3417;3418;3505;3775;3776;3777;3778;3779;3780;3781;3782;9709;9710;9711;9712;9713;9714;9715;9716;9717;9718;9719;9740;9741;9742;9743	1264;1265;1266;4499;4500;4501;4502;4503;4504;4505;4506;4600;4957;4958;4959;4960;4961;4962;4963;4964;13123;13124;13125;13126;13127;13128;13129;13130;13131;13132;13133;13154;13155;13156;13157	1266;4506;4600;4960;13129;13155
P21333-2;P21333;Q14315-2;Q14315	P21333-2;P21333	Filamin-A	FLNA	sp|P21333-2|FLNA_HUMAN Isoform 2 of Filamin-A OS=Homo sapiens GN=FLNA;sp|P21333|FLNA_HUMAN Filamin-A OS=Homo sapiens GN=FLNA PE=1 SV=4	280.01	2639	3	1	2	1.6	0.5	1.2	3369300	710330	2653000	5	0	0	2.3	0	0	6196500	0	0	12929000				141	190;780;894;1965;1988;2091	True;True;True;True;True;True	195;801;920;2044;2069;2177	642;3380;3879;9103;9104;9313;9314;9315;9316;9596;9597	785;4461;5106;12226;12227;12685;12686;12687;12688;12992;12993	785;4461;5106;12227;12688;12992
P26641;P26641-2	P26641;P26641-2	Elongation factor 1-gamma	EEF1G	sp|P26641|EF1G_HUMAN Elongation factor 1-gamma OS=Homo sapiens GN=EEF1G PE=1 SV=3;sp|P26641-2|EF1G_HUMAN Isoform 2 of Elongation factor 1-gamma OS=Homo sapiens GN=EEF1G	50.118	437	1	1	1	3	3	3	1764700	1421200	2526000	0	0	0	0	0	0	0	0	0	52306000				155	117;954	True;True	118;981	352;353;354;355;356;357;4075;4076;4077	418;419;420;421;422;423;5352;5353;5354	423;5352
P22626-2;P22626	P22626-2;P22626	Heterogeneous nuclear ribonucleoproteins A2/B1	HNRNPA2B1	sp|P22626-2|ROA2_HUMAN Isoform A2 of Heterogeneous nuclear ribonucleoproteins A2/B1 OS=Homo sapiens GN=HNRNPA2B1;sp|P22626|ROA2_HUMAN Heterogeneous nuclear ribonucleoproteins A2/B1 OS=Homo sapiens GN=HNRNPA2B1 PE=1 SV=2	36.006	341	0	0	1	0	0	4.4	0	0	2060700	0	0	0	0	0	0	0	0	0	22222000				145	641;1465	True;True	660;1526	2433;2434;2435;6646	3123;3124;3125;8945	3124;8945
P07910-4;P07910-2;P07910;P07910-3;P0DMR1;O60812;B7ZW38;B2RXH8	P07910-4;P07910-2;P07910;P07910-3	Heterogeneous nuclear ribonucleoproteins C1/C2	HNRNPC	sp|P07910-4|HNRPC_HUMAN Isoform 4 of Heterogeneous nuclear ribonucleoproteins C1/C2 OS=Homo sapiens GN=HNRNPC;sp|P07910-2|HNRPC_HUMAN Isoform C1 of Heterogeneous nuclear ribonucleoproteins C1/C2 OS=Homo sapiens GN=HNRNPC;sp|P07910|HNRPC_HUMAN Heterogeneous	27.821	250	0	0	1	0	0	3.6	0	0	1848400	0	0	0	0	0	0	0	0	0	61663000				103	182;629;1272;1997;2095	True;True;True;True;True	187;648;1309;2078;2181	625;2370;2371;2372;5833;9334;9606;9607;9608	765;3041;3042;3043;7978;12710;12711;13002;13003;13004;13005;13006	765;3042;7978;12710;13005	49		74
Q08211;Q08211-2	Q08211	ATP-dependent RNA helicase A	DHX9	sp|Q08211|DHX9_HUMAN ATP-dependent RNA helicase A OS=Homo sapiens GN=DHX9 PE=1 SV=4	140.96	1270	0	1	1	0	0.9	0.9	0	1240400	1824700	0	0	0	0	0	0	0	0	0	227040000				272	7;15;85;328;410;690;865;898;980;1270;1518;1995;2214;2220;2231	True;True;True;True;True;True;True;True;True;True;True;True;True;True;True	7;15;85;339;424;709;891;924;1007;1307;1581;2076;2304;2310;2321	19;33;246;247;248;1132;1133;1134;1135;1472;1473;1474;1475;1476;2615;3802;3915;3916;4226;4227;4228;4229;4230;4231;5831;6851;6852;9331;10193;10194;10207;10208;10209;10210;10211;10212;10234;10235;10236	21;36;276;277;278;1349;1350;1351;1352;1782;1783;1784;1785;1786;1787;3340;4984;5175;5176;5592;5593;5594;5595;5596;5597;7976;9194;9195;12707;13765;13766;13779;13780;13781;13782;13783;13784;13806;13807;13808	21;36;278;1349;1787;3340;4984;5176;5597;7976;9195;12707;13765;13779;13806	92		1059
P39023	P39023	60S ribosomal protein L3	RPL3	sp|P39023|RL3_HUMAN 60S ribosomal protein L3 OS=Homo sapiens GN=RPL3 PE=1 SV=2	46.108	403	0	0	1	0	0	3	0	0	1695000	0	0	0	0	0	0	0	0	0	1695000				186	1377	TRUE	1434	6358	8612	8612
P63165;P63165-2	P63165;P63165-2	Small ubiquitin-related modifier 1	SUMO1	sp|P63165|SUMO1_HUMAN Small ubiquitin-related modifier 1 OS=Homo sapiens GN=SUMO1 PE=1 SV=1;sp|P63165-2|SUMO1_HUMAN Isoform 2 of Small ubiquitin-related modifier 1 OS=Homo sapiens GN=SUMO1	11.557	101	0	0	2	0	0	24.8	0	0	1683100	0	0	1	0	0	11.9	0	0	2261700	16934000				241	1082;1483;1614;2026	True;True;True;True	1111;1545;1680;2107	4874;6716;6717;6718;6719;7568;7569;9403;9404	6497;9033;9034;9035;9036;10184;10185;12780;12781	6497;9034;10185;12780
Q9NVP1	Q9NVP1	ATP-dependent RNA helicase DDX18	DDX18	sp|Q9NVP1|DDX18_HUMAN ATP-dependent RNA helicase DDX18 OS=Homo sapiens GN=DDX18 PE=1 SV=2	75.406	670	0	0	1	0	0	1.8	0	0	1641000	0	0	0	0	0	0	0	0	0	12907000				385	1360;1546	True;True	1414;1609	6265;6266;6267;6268;6974	8504;8505;8506;8507;9360	8505;9360
P10809;P10809-2	P10809	60 kDa heat shock protein, mitochondrial	HSPD1	sp|P10809|CH60_HUMAN 60 kDa heat shock protein, mitochondrial OS=Homo sapiens GN=HSPD1 PE=1 SV=2	61.054	573	0	1	1	0	1.6	1.6	0	1302400	1540100	0	0	0	0	0	0	0	0	0	25958000				113	1932;2013;2121	True;True;True	2007;2094;2208	8975;9376;9720;9721;9722;9723	12087;12753;13134;13135;13136;13137	12087;12753;13136
P17480-2;P17480	P17480-2;P17480	Nucleolar transcription factor 1	UBTF	sp|P17480-2|UBF1_HUMAN Isoform UBF2 of Nucleolar transcription factor 1 OS=Homo sapiens GN=UBTF;sp|P17480|UBF1_HUMAN Nucleolar transcription factor 1 OS=Homo sapiens GN=UBTF PE=1 SV=1	84.936	727	0	0	1	0	0	1.8	0	0	1361000	0	0	0	0	0	0	0	0	0	78940000				135	553;766;1303;1505;2199	True;True;True;True;True	572;787;1353;1567;2288	2069;2070;2071;3040;3041;3042;5993;6809;6810;6811;6812;10101	2597;2598;2599;3945;3946;3947;8169;9150;9151;9152;9153;9154;13649	2599;3945;8169;9150;13649
P13010	P13010	X-ray repair cross-complementing protein 5	XRCC5	sp|P13010|XRCC5_HUMAN X-ray repair cross-complementing protein 5 OS=Homo sapiens GN=XRCC5 PE=1 SV=3	82.704	732	0	0	1	0	0	2	0	0	1322000	0	0	0	0	0	0	0	0	0	195960000				121	144;298;365;669;756;1047;1216;1808;1852;1947;2041;2187	True;True;True;True;True;True;True;True;True;True;True;True	147;307;377;688;777;1076;1249;1876;1922;2025;2122;2123;2275	413;414;1037;1291;1292;1293;1294;1295;1296;2559;2957;2958;2959;4483;5682;5683;5684;8503;8504;8505;8656;8657;9059;9060;9061;9429;9430;9431;9432;10028	479;480;1239;1540;1541;1542;1543;1544;1545;3284;3819;3820;3821;5899;7816;7817;7818;11487;11488;11489;11651;11652;12181;12182;12183;12806;12807;12808;12809;13551	479;1239;1540;3284;3819;5899;7817;11487;11652;12183;12808;13551	55		40
P05089;P05089-2;P05089-3	P05089;P05089-2	Arginase-1	ARG1	sp|P05089|ARGI1_HUMAN Arginase-1 OS=Homo sapiens GN=ARG1 PE=1 SV=2;sp|P05089-2|ARGI1_HUMAN Isoform 2 of Arginase-1 OS=Homo sapiens GN=ARG1	34.735	322	1	1	1	2.2	3.4	3.4	0	1451900	1295800	1	0	0	3.4	0	0	1456400	0	0	57125000				88	658;659;1888;2084;2182	True;True;True;True;True	677;678;1960;2167;2168;2270	2535;2536;2537;2538;2539;2540;2541;2542;2543;8820;9563;9564;9565;9566;10021	3260;3261;3262;3263;3264;3265;3266;3267;3268;11912;12959;12960;12961;12962;13544	3265;3267;11912;12959;13544	45		212
O43143	O43143	Pre-mRNA-splicing factor ATP-dependent RNA helicase DHX15	DHX15	sp|O43143|DHX15_HUMAN Pre-mRNA-splicing factor ATP-dependent RNA helicase DHX15 OS=Homo sapiens GN=DHX15 PE=1 SV=2	90.932	795	0	0	1	0	0	1.5	0	0	1236400	0	0	0	0	0	0	0	0	0	43503000				53	136;186;482;1712;1815;2189	True;True;True;True;True;True	139;191;500;1778;1883;2277	398;632;1727;1728;8114;8115;8540;8541;10032;10033	464;772;2072;2073;10956;10957;11530;11531;13555;13556	464;772;2073;10957;11531;13555
P0DN76;Q01081	P0DN76;Q01081	Splicing factor U2AF 35 kDa subunit	U2AF1	sp|P0DN76|U2AF5_HUMAN Splicing factor U2AF 35 kDa subunit-like protein OS=Homo sapiens GN=U2AF1L5 PE=1 SV=1;sp|Q01081|U2AF1_HUMAN Splicing factor U2AF 35 kDa subunit OS=Homo sapiens GN=U2AF1 PE=1 SV=3	27.872	240	0	0	1	0	0	5.4	0	0	1234500	0	0	0	0	0	0	0	0	0	1845300				111	1387	TRUE	1444	6386;6387	8642;8643	8642
Q9BQG0;Q9BQG0-2	Q9BQG0;Q9BQG0-2	Myb-binding protein 1A	MYBBP1A	sp|Q9BQG0|MBB1A_HUMAN Myb-binding protein 1A OS=Homo sapiens GN=MYBBP1A PE=1 SV=2;sp|Q9BQG0-2|MBB1A_HUMAN Isoform 2 of Myb-binding protein 1A OS=Homo sapiens GN=MYBBP1A	148.85	1328	0	1	2	0	0.8	2.2	0	549670	1214700	2	0	2	1.4	0	1.4	3700200	0	3279200	33788000				371	65;396;1125;1230;1715	True;True;True;True;True	65;409;1155;1263;1781	188;189;190;1412;1413;1414;1415;1416;5061;5062;5063;5721;8120;8121	215;216;217;1717;1718;1719;1720;1721;6793;6794;6795;7856;10962;10963	217;1721;6794;7856;10962
P22314-2;P22314	P22314-2;P22314	Ubiquitin-like modifier-activating enzyme 1	UBA1	sp|P22314-2|UBA1_HUMAN Isoform 2 of Ubiquitin-like modifier-activating enzyme 1 OS=Homo sapiens GN=UBA1;sp|P22314|UBA1_HUMAN Ubiquitin-like modifier-activating enzyme 1 OS=Homo sapiens GN=UBA1 PE=1 SV=3	113.8	1018	0	0	1	0	0	1.5	0	0	1161400	0	0	0	0	0	0	0	0	0	70605000				143	53;125;126;285;987;1087;1179;1323;1334;2159	True;True;True;True;True;True;True;True;True;True	53;128;129;294;1014;1116;1212;1373;1384;2247	151;380;381;382;1001;1002;4252;4253;4254;4932;5247;5248;6062;6102;9878	174;446;447;448;1199;1200;5618;5619;5620;6613;7015;7016;8265;8309;13317	174;447;448;1200;5620;6613;7016;8265;8309;13317
Q99615-2;Q99615	Q99615-2;Q99615	DnaJ homolog subfamily C member 7	DNAJC7	sp|Q99615-2|DNJC7_HUMAN Isoform 2 of DnaJ homolog subfamily C member 7 OS=Homo sapiens GN=DNAJC7;sp|Q99615|DNJC7_HUMAN DnaJ homolog subfamily C member 7 OS=Homo sapiens GN=DNAJC7 PE=1 SV=2	50.096	438	0	0	1	0	0	2.5	0	0	1151700	0	0	0	0	0	0	0	0	0	4599400				367	341	TRUE	353	1183;1184;1185	1409;1410;1411	1411
Q8IZ73-2;Q8IZ73	Q8IZ73-2;Q8IZ73	RNA pseudouridylate synthase domain-containing protein 2	RPUSD2	sp|Q8IZ73-2|RUSD2_HUMAN Isoform 2 of RNA pseudouridylate synthase domain-containing protein 2 OS=Homo sapiens GN=RPUSD2;sp|Q8IZ73|RUSD2_HUMAN RNA pseudouridylate synthase domain-containing protein 2 OS=Homo sapiens GN=RPUSD2 PE=1 SV=2	54.097	484	0	0	1	0	0	4.3	0	0	1073300	0	0	0	0	0	0	0	0	0	115400000				337	278;487;675;1092;1205;1265;1875;1986	True;True;True;True;True;True;True;True	286;505;694;1121;1238;1301;1947;2067	961;1739;1740;2571;4963;5659;5824;8791;9309;9310	1159;2084;2085;3296;6687;7792;7969;11883;12681;12682	1159;2084;3296;6687;7792;7969;11883;12681	100		403
Q04637-6;Q04637-7;Q04637-5;Q04637-4;Q04637-3;Q04637;Q04637-8;Q04637-9	Q04637-6;Q04637-7;Q04637-5;Q04637-4;Q04637-3;Q04637;Q04637-8;Q04637-9	Eukaryotic translation initiation factor 4 gamma 1	EIF4G1	sp|Q04637-6|IF4G1_HUMAN Isoform E of Eukaryotic translation initiation factor 4 gamma 1 OS=Homo sapiens GN=EIF4G1;sp|Q04637-7|IF4G1_HUMAN Isoform 7 of Eukaryotic translation initiation factor 4 gamma 1 OS=Homo sapiens GN=EIF4G1;sp|Q04637-5|IF4G1_HUMAN Isof	154.8	1403	0	0	2	0	0	2.9	0	0	1067200	1	0	3	1.2	0	3.8	2224600	0	7905000	23932000				267	127;568;648;724;2098	True;True;True;True;True	130;587;667;745;2184	383;2102;2103;2104;2105;2451;2789;2790;2791;9640	449;2630;2631;2632;2633;3150;3578;3579;3580;13042	449;2633;3150;3580;13042
Q5C9Z4	Q5C9Z4	Nucleolar MIF4G domain-containing protein 1	NOM1	sp|Q5C9Z4|NOM1_HUMAN Nucleolar MIF4G domain-containing protein 1 OS=Homo sapiens GN=NOM1 PE=1 SV=1	96.256	860	0	0	2	0	0	2.9	0	0	1063400	0	0	1	0	0	1.4	0	0	0	18315000				319	119;175;1795;1908	True;True;True;True	120;179;1863;1980	359;360;588;589;8445;8446;8889;8890	425;426;723;724;11426;11427;11989;11990	426;724;11426;11989
Q8N9T8	Q8N9T8	Protein KRI1 homolog	KRI1	sp|Q8N9T8|KRI1_HUMAN Protein KRI1 homolog OS=Homo sapiens GN=KRI1 PE=1 SV=3	82.597	703	0	0	1	0	0	2.1	0	0	1055700	0	0	0	0	0	0	0	0	0	5848200				339	364	TRUE	376	1287;1288;1289;1290	1536;1537;1538;1539	1536
O75691	O75691	Small subunit processome component 20 homolog	UTP20	sp|O75691|UTP20_HUMAN Small subunit processome component 20 homolog OS=Homo sapiens GN=UTP20 PE=1 SV=3	318.38	2785	0	1	1	0	0.4	0.4	0	848400	1052900	0	0	1	0	0	0.4	0	0	656040	2557300				65	1006	TRUE	1033	4356;4357;4358	5748;5749;5750	5749
P09651-3;P09651-2;P09651	P09651-3;P09651-2;P09651	Heterogeneous nuclear ribonucleoprotein A1;Heterogeneous nuclear ribonucleoprotein A1, N-terminally processed	HNRNPA1	sp|P09651-3|ROA1_HUMAN Isoform 2 of Heterogeneous nuclear ribonucleoprotein A1 OS=Homo sapiens GN=HNRNPA1;sp|P09651-2|ROA1_HUMAN Isoform A1-A of Heterogeneous nuclear ribonucleoprotein A1 OS=Homo sapiens GN=HNRNPA1;sp|P09651|ROA1_HUMAN Heterogeneous nuclea	29.386	267	0	0	1	0	0	6.7	0	0	1032000	0	0	0	0	0	0	0	0	0	15048000				108	1391;1633;1748	True;True;True	1448;1699;1814	6400;7625;7626;8252;8253	8656;10261;10262;11152;11153	8656;10262;11153
Q92945	Q92945	Far upstream element-binding protein 2	KHSRP	sp|Q92945|FUBP2_HUMAN Far upstream element-binding protein 2 OS=Homo sapiens GN=KHSRP PE=1 SV=4	73.114	711	0	0	2	0	0	4.4	0	0	988820	0	0	0	0	0	0	0	0	0	130450000				352	92;642;643;778;815;816;832;892;953;1276;1777;2105	True;True;True;True;True;True;True;True;True;True;True;True	92;661;662;799;836;837;853;918;980;1313;1314;1845;2191	268;269;270;2436;2437;3376;3464;3465;3466;3520;3876;4074;5838;5839;5840;5841;5842;5843;8375;8376;8377;8378;8379;8380;9669	298;299;300;3126;3127;4457;4559;4560;4561;4615;5103;5351;7983;7984;7985;7986;7987;7988;11339;11340;11341;11342;11343;11344;13079	300;3126;3127;4457;4559;4560;4615;5103;5351;7988;11342;13079	101;102		267;373
Q9BU76-4;Q9BU76	Q9BU76-4;Q9BU76	Multiple myeloma tumor-associated protein 2	MMTAG2	sp|Q9BU76-4|MMTA2_HUMAN Isoform 4 of Multiple myeloma tumor-associated protein 2 OS=Homo sapiens GN=MMTAG2;sp|Q9BU76|MMTA2_HUMAN Multiple myeloma tumor-associated protein 2 OS=Homo sapiens GN=MMTAG2 PE=1 SV=1	20.536	189	1	0	1	7.4	0	7.4	1204400	0	966830	1	0	0	7.4	0	0	1208900	0	0	3380200				373	1991	TRUE	2072	9323;9324;9325	12699;12700;12701	12699
P55072	P55072	Transitional endoplasmic reticulum ATPase	VCP	sp|P55072|TERA_HUMAN Transitional endoplasmic reticulum ATPase OS=Homo sapiens GN=VCP PE=1 SV=4	89.321	806	0	0	1	0	0	1.5	0	0	916060	0	0	0	0	0	0	0	0	0	166780000				217	83;88;320;430;446;463;464;485;647;736;977;985;986;1018;1053;1263;1547;2034;2035;2149	True;True;True;True;True;True;True;True;True;True;True;True;True;True;True;True;True;True;True;True	83;88;330;445;461;479;480;503;666;757;1004;1012;1013;1045;1082;1299;1610;2115;2116;2237	240;241;242;243;256;257;1111;1552;1601;1662;1663;1731;1732;1733;1734;1735;1736;2450;2825;2826;4209;4210;4247;4248;4249;4250;4251;4382;4511;5822;6975;9420;9421;9422;9837;9838;9839;9840	270;271;272;273;286;287;1328;1867;1923;1991;1992;2076;2077;2078;2079;2080;2081;3149;3626;3627;5565;5566;5613;5614;5615;5616;5617;5775;5933;7967;9361;12797;12798;12799;13261;13262;13263;13264	273;287;1328;1867;1923;1991;1992;2076;3149;3626;5566;5613;5616;5775;5933;7967;9361;12797;12798;13262
P14923;P35222	P14923	Junction plakoglobin	JUP	sp|P14923|PLAK_HUMAN Junction plakoglobin OS=Homo sapiens GN=JUP PE=1 SV=3	81.744	745	4	1	1	6.4	1.6	1.6	12705000	743190	871780	2	0	0	3	0	0	4048700	0	0	464210000				128	66;122;765;899;1121;1154;1242;1326;1354;1364;1365;1601;1872;2072;2118	True;True;True;True;True;True;True;True;True;True;True;True;True;True;True	66;123;124;786;925;1150;1186;1275;1376;1408;1418;1419;1665;1943;1944;2154;2204	191;192;193;194;195;196;366;367;368;369;3037;3038;3039;3917;3918;3919;5039;5040;5041;5042;5183;5763;5764;6071;6072;6237;6238;6239;6275;6276;7454;7455;7456;8744;8745;8746;8747;8748;8749;8750;8751;8752;8753;8754;8755;8756;8757;8758;9535;9703;9704	218;219;220;221;222;223;432;433;434;435;3942;3943;3944;5177;5178;5179;6771;6772;6773;6774;6945;7904;7905;8276;8277;8476;8477;8478;8514;8515;10009;10010;10011;11797;11798;11799;11800;11801;11802;11803;11804;11805;11806;11807;11808;11809;11810;11811;11812;12928;13117;13118	223;434;3942;5178;6771;6945;7904;8277;8478;8514;8515;10010;11809;12928;13117	58;59;60		180;193;354
Q96GQ7	Q96GQ7	Probable ATP-dependent RNA helicase DDX27	DDX27	sp|Q96GQ7|DDX27_HUMAN Probable ATP-dependent RNA helicase DDX27 OS=Homo sapiens GN=DDX27 PE=1 SV=2	89.834	796	0	0	1	0	0	1.1	0	0	863340	0	0	0	0	0	0	0	0	0	8032400				359	16;142;347	True;True;True	16;145;359	34;411;1197;1198	37;477;1423;1424	37;477;1423	103		727
P25311	P25311	Zinc-alpha-2-glycoprotein	AZGP1	sp|P25311|ZA2G_HUMAN Zinc-alpha-2-glycoprotein OS=Homo sapiens GN=AZGP1 PE=1 SV=2	34.258	298	0	0	1	0	0	3.4	0	0	851050	0	1	0	0	3.4	0	0	1875500	0	123820000				153	68;213;214;1458	True;True;True;True	68;218;219;1518	201;202;203;204;205;206;207;699;700;701;702;703;704;705;706;707;708;709;6625;6626;6627	228;229;230;231;232;233;234;843;844;845;846;847;848;849;850;851;852;853;854;8923;8924;8925	229;843;852;8925
P50990-2;P50990;P50990-3	P50990-2;P50990;P50990-3	T-complex protein 1 subunit theta	CCT8	sp|P50990-2|TCPQ_HUMAN Isoform 2 of T-complex protein 1 subunit theta OS=Homo sapiens GN=CCT8;sp|P50990|TCPQ_HUMAN T-complex protein 1 subunit theta OS=Homo sapiens GN=CCT8 PE=1 SV=4;sp|P50990-3|TCPQ_HUMAN Isoform 3 of T-complex protein 1 subunit theta OS=	57.645	529	1	0	1	1.9	0	2.1	1208200	0	678190	0	0	0	0	0	0	0	0	0	8893400				206	82;503;1001;1051	True;True;True;True	82;521;1028;1080	239;1798;4346;4509	269;2164;5738;5931	269;2164;5738;5931
Q00610-2;Q00610	Q00610-2;Q00610	Clathrin heavy chain 1	CLTC	sp|Q00610-2|CLH1_HUMAN Isoform 2 of Clathrin heavy chain 1 OS=Homo sapiens GN=CLTC;sp|Q00610|CLH1_HUMAN Clathrin heavy chain 1 OS=Homo sapiens GN=CLTC PE=1 SV=5	187.89	1639	0	0	1	0	0	0.7	0	0	643380	0	0	0	0	0	0	0	0	0	62025000				257	932;997;1139;1378;1380;2038	True;True;True;True;True;True	958;1024;1171;1435;1437;2119	4016;4017;4018;4322;4323;5120;5121;6359;6360;6361;6362;6366;9426	5286;5287;5288;5289;5705;5706;6871;6872;8613;8614;8615;8616;8620;12803	5286;5705;6871;8616;8620;12803
O15027-2;O15027-4;O15027-3;O15027;O15027-5	O15027-2;O15027-4;O15027-3;O15027;O15027-5	Protein transport protein Sec16A	SEC16A	sp|O15027-2|SC16A_HUMAN Isoform 2 of Protein transport protein Sec16A OS=Homo sapiens GN=SEC16A;sp|O15027-4|SC16A_HUMAN Isoform 4 of Protein transport protein Sec16A OS=Homo sapiens GN=SEC16A;sp|O15027-3|SC16A_HUMAN Isoform 3 of Protein transport protein S	228.87	2134	0	0	1	0	0	0.5	0	0	636710	1	0	1	0.5	0	0.5	1065300	0	693540	2395600				48	1388	TRUE	1445	6388;6389;6390	8644;8645;8646	8644
Q9Y6W3	Q9Y6W3	Calpain-7	CAPN7	sp|Q9Y6W3|CAN7_HUMAN Calpain-7 OS=Homo sapiens GN=CAPN7 PE=1 SV=1	92.651	813	1	0	0	1.1	0	0	2520600	0	0	0	0	1	0	0	1.1	0	0	205990000	211970000				406	879	TRUE	905	3830;3831;3832	5013;5014;5015	5015
P35579;P35579-2	P35579;P35579-2	Myosin-9	MYH9	sp|P35579|MYH9_HUMAN Myosin-9 OS=Homo sapiens GN=MYH9 PE=1 SV=4;sp|P35579-2|MYH9_HUMAN Isoform 2 of Myosin-9 OS=Homo sapiens GN=MYH9	226.53	1960	0	0	0	0	0	0	0	0	0	0	4	8	0	2.2	4.6	0	8070700	19207000	33088000				178	77;112;113;323;413;783;1016;1498;1572;1832	True;True;True;True;True;True;True;True;True;True	77;113;114;334;427;804;1043;1560;1636;1901	227;344;345;346;1123;1124;1479;3383;4380;6798;6799;7063;8588	257;410;411;412;1340;1341;1790;4464;5773;9138;9139;9455;11580	257;410;412;1340;1790;4464;5773;9138;9455;11580
P35580;P35580-5;P35580-2;P35580-3;P35580-4;P35749-4;P35749-3;P35749;P35749-2	P35580;P35580-5;P35580-2;P35580-3;P35580-4	Myosin-10	MYH10	sp|P35580|MYH10_HUMAN Myosin-10 OS=Homo sapiens GN=MYH10 PE=1 SV=3;sp|P35580-5|MYH10_HUMAN Isoform 5 of Myosin-10 OS=Homo sapiens GN=MYH10;sp|P35580-2|MYH10_HUMAN Isoform 2 of Myosin-10 OS=Homo sapiens GN=MYH10;sp|P35580-3|MYH10_HUMAN Isoform 3 of Myosin-1	229	1976	0	0	0	0	0	0	0	0	0	0	3	8	0	1.8	4.4	0	2921200	13028000	15949000				179	77;107;108;114;412;944;1016;1174;1554	False;True;True;True;True;True;False;True;True	77;108;109;115;426;971;1043;1207;1617	227;308;309;310;347;348;1478;4055;4380;5231;7002	257;340;341;342;413;414;1789;5332;5773;6999;9389	257;340;342;414;1789;5332;5773;6999;9389
Q13813-3;Q13813;Q13813-2	Q13813-3;Q13813;Q13813-2	Spectrin alpha chain, non-erythrocytic 1	SPTAN1	sp|Q13813-3|SPTN1_HUMAN Isoform 3 of Spectrin alpha chain, non-erythrocytic 1 OS=Homo sapiens GN=SPTAN1;sp|Q13813|SPTN1_HUMAN Spectrin alpha chain, non-erythrocytic 1 OS=Homo sapiens GN=SPTAN1 PE=1 SV=3;sp|Q13813-2|SPTN1_HUMAN Isoform 2 of Spectrin alpha c	282.28	2452	2	0	0	1.3	0	0	2638100	0	0	13	2	7	6.4	1.3	4	25188000	2800300	12125000	42752000				285	93;266;276;327;342;769;908;1069;1076;1100;1389;1597;1733;2061	True;True;True;True;True;True;True;True;True;True;True;True;True;True	93;274;284;338;354;790;934;1098;1105;1129;1446;1661;1799;2143	271;930;931;955;1131;1186;1187;1188;3184;3977;4790;4800;4977;4978;6391;6392;6393;7446;7447;7448;8163;9510;9511;9512	301;1127;1128;1153;1348;1412;1413;1414;4130;5245;6332;6342;6701;6702;8647;8648;8649;10001;10002;10003;11006;12903;12904;12905	301;1128;1153;1348;1412;4130;5245;6332;6342;6701;8647;10002;11006;12904
P31948-3;P31948;P31948-2	P31948-3;P31948;P31948-2	Stress-induced-phosphoprotein 1	STIP1	sp|P31948-3|STIP1_HUMAN Isoform 3 of Stress-induced-phosphoprotein 1 OS=Homo sapiens GN=STIP1;sp|P31948|STIP1_HUMAN Stress-induced-phosphoprotein 1 OS=Homo sapiens GN=STIP1 PE=1 SV=1;sp|P31948-2|STIP1_HUMAN Isoform 2 of Stress-induced-phosphoprotein 1 OS=H	59.777	519	0	0	0	0	0	0	0	0	0	0	0	4	0	0	6.7	0	0	11686000	121680000				171	105;106;290;335;1007;1075;1266;1859	True;True;True;True;True;True;True;True	106;107;299;347;1034;1104;1302;1303;1929	306;307;1015;1165;4359;4799;5825;5826;5827;8688	338;339;1214;1390;5751;6341;7970;7971;7972;11732	338;339;1214;1390;5751;6341;7972;11732	63		1
Q9UJF2;Q9UJF2-2	Q9UJF2;Q9UJF2-2	Ras GTPase-activating protein nGAP	RASAL2	sp|Q9UJF2|NGAP_HUMAN Ras GTPase-activating protein nGAP OS=Homo sapiens GN=RASAL2 PE=1 SV=2;sp|Q9UJF2-2|NGAP_HUMAN Isoform 2 of Ras GTPase-activating protein nGAP OS=Homo sapiens GN=RASAL2	128.56	1139	0	0	0	0	0	0	0	0	0	0	0	1	0	0	0.6	0	0	11025000	11025000				394	1564	TRUE	1628	7035	9426	9426
Q01082;Q01082-3;Q01082-2	Q01082;Q01082-3;Q01082-2	Spectrin beta chain, non-erythrocytic 1	SPTBN1	sp|Q01082|SPTB2_HUMAN Spectrin beta chain, non-erythrocytic 1 OS=Homo sapiens GN=SPTBN1 PE=1 SV=2;sp|Q01082-3|SPTB2_HUMAN Isoform 2 of Spectrin beta chain, non-erythrocytic 1 OS=Homo sapiens GN=SPTBN1;sp|Q01082-2|SPTB2_HUMAN Isoform Short of Spectrin beta	274.61	2364	0	0	0	0	0	0	0	0	0	13	2	3	6.8	1.1	2.1	33128000	3979300	5518500	42626000				259	134;167;873;1097;1114;1243;1485;1504;1736;1790;1797;2079;2102	True;True;True;True;True;True;True;True;True;True;True;True;True	137;171;899;1126;1143;1276;1547;1566;1802;1858;1865;2161;2188	392;393;394;541;542;3817;4973;5028;5765;6724;6808;8170;8438;8439;8449;8450;9550;9666	458;459;460;649;650;5000;6697;6760;7906;9041;9149;11013;11419;11420;11430;11431;12943;13076	458;649;5000;6697;6760;7906;9041;9149;11013;11419;11430;12943;13076
Q93008-1;Q93008	Q93008-1;Q93008	Probable ubiquitin carboxyl-terminal hydrolase FAF-X	USP9X	sp|Q93008-1|USP9X_HUMAN Isoform 2 of Probable ubiquitin carboxyl-terminal hydrolase FAF-X OS=Homo sapiens GN=USP9X;sp|Q93008|USP9X_HUMAN Probable ubiquitin carboxyl-terminal hydrolase FAF-X OS=Homo sapiens GN=USP9X PE=1 SV=3	290.46	2554	0	0	0	0	0	0	0	0	0	2	0	1	0.9	0	0.5	2018400	0	1106200	3124600				354	255;2139	True;True	263;2227	889;9809;9810	1085;13233;13234	1085;13234
P35658-2;P35658-4;P35658;P35658-3;P35658-5	P35658-2;P35658-4;P35658;P35658-3;P35658-5	Nuclear pore complex protein Nup214	NUP214	sp|P35658-2|NU214_HUMAN Isoform 2 of Nuclear pore complex protein Nup214 OS=Homo sapiens GN=NUP214;sp|P35658-4|NU214_HUMAN Isoform 4 of Nuclear pore complex protein Nup214 OS=Homo sapiens GN=NUP214;sp|P35658|NU214_HUMAN Nuclear pore complex protein Nup214	212.57	2079	0	0	0	0	0	0	0	0	0	5	0	1	2.6	0	0.7	23970000	0	984590	24954000				181	394;1148;1424;1617;1909	True;True;True;True;True	407;1180;1483;1683;1981	1410;5170;6502;7575;8891;8892	1715;6932;8770;10196;11991;11992	1715;6932;8770;10196;11992
P04259	P04259	Keratin, type II cytoskeletal 6B	KRT6B	sp|P04259|K2C6B_HUMAN Keratin, type II cytoskeletal 6B OS=Homo sapiens GN=KRT6B PE=1 SV=5	60.066	564	17	10	10	27.3	11.9	11.9	0	0	0	13	4	4	15.1	6.2	6.9	0	0	0	14651000	+			82	41;47;137;170;187;188;192;316;318;497;510;512;550;707;713;902;941;956;965;989;1030;1105;1117;1345;1351;1352;1356;1373;1415;1452;1461;1496;1514;1578;1645;1704;1705;1742;1743;1788;1789;2055;2152;2161;2162;2165	False;False;False;False;False;False;False;False;False;False;False;False;False;False;False;False;False;False;False;False;False;False;False;False;False;False;False;False;False;False;False;True;False;False;False;False;False;False;False;False;False;False;False;False;False;False	41;47;140;174;192;193;197;324;326;327;515;528;530;569;728;734;928;967;983;992;1016;1059;1134;1146;1399;1405;1406;1410;1427;1474;1512;1522;1558;1577;1642;1711;1770;1771;1808;1809;1856;1857;2137;2240;2249;2250;2253	96;97;98;99;100;101;134;135;136;137;399;566;567;568;569;570;571;572;573;574;575;576;633;634;635;636;646;647;648;649;1069;1070;1071;1072;1073;1074;1075;1082;1083;1084;1085;1086;1087;1786;1787;1788;1820;1821;1822;1823;1825;1826;1827;1828;1829;1830;1831;1832;1833;1834;1835;1836;1837;1838;2029;2030;2031;2032;2033;2034;2035;2686;2687;2688;2689;2690;2691;2692;2693;2694;2695;2717;2718;2719;2720;2721;272…	101;102;103;104;105;106;157;158;159;160;465;685;686;687;688;689;690;691;692;693;694;695;696;697;698;699;700;701;702;703;704;705;706;707;708;773;774;775;776;777;778;789;790;791;792;1272;1273;1274;1275;1276;1277;1278;1285;1286;1287;1288;1289;1290;2151;2152;2153;2154;2188;2189;2190;2191;2192;2193;2194;2196;2197;2198;2199;2200;2201;2202;2203;2204;2205;2206;2207;2208;2209;2210;2211;2212;2213;2214;2530…	103;157;465;703;773;778;791;1278;1285;2151;2190;2196;2535;3447;3477;5192;5306;5369;5410;5686;5833;6729;6764;8360;8431;8438;8498;8530;8753;8870;8935;9125;9186;9843;10306;10932;10933;11129;11132;11403;11410;12884;13279;13319;13327;13413	10		279
Q9HB71;Q9HB71-3;Q9HB71-2	Q9HB71;Q9HB71-3	Calcyclin-binding protein	CACYBP	sp|Q9HB71|CYBP_HUMAN Calcyclin-binding protein OS=Homo sapiens GN=CACYBP PE=1 SV=2;sp|Q9HB71-3|CYBP_HUMAN Isoform 3 of Calcyclin-binding protein OS=Homo sapiens GN=CACYBP	26.21	228	0	0	0	0	0	0	0	0	0	0	0	0	0	0	0	0	0	0	26740000				382	52;174;930;935	True;True;True;True	52;178;956;961	150;587;4012;4024	173;722;5282;5295	173;722;5282;5295
P29966	P29966	Myristoylated alanine-rich C-kinase substrate	MARCKS	sp|P29966|MARCS_HUMAN Myristoylated alanine-rich C-kinase substrate OS=Homo sapiens GN=MARCKS PE=1 SV=4	31.554	332	0	0	0	0	0	0	0	0	0	0	0	0	0	0	0	0	0	0	26780000				164	343;618;625	True;True;True	355;637;644	1189;2338;2339;2340;2341;2360	1415;3005;3006;3007;3008;3031	1415;3006;3031
P12273	P12273	Prolactin-inducible protein	PIP	sp|P12273|PIP_HUMAN Prolactin-inducible protein OS=Homo sapiens GN=PIP PE=1 SV=1	16.572	146	0	0	0	0	0	0	0	0	0	0	1	0	0	8.2	0	0	740390	0	30046000				120	417;1938;1950	True;True;True	432;2014;2028	1490;1491;9030;9031;9032;9064	1801;1802;12151;12152;12153;12186	1802;12151;12186
P33993;P33993-3;P33993-2	P33993;P33993-3;P33993-2	DNA replication licensing factor MCM7	MCM7	sp|P33993|MCM7_HUMAN DNA replication licensing factor MCM7 OS=Homo sapiens GN=MCM7 PE=1 SV=4;sp|P33993-3|MCM7_HUMAN Isoform 3 of DNA replication licensing factor MCM7 OS=Homo sapiens GN=MCM7;sp|P33993-2|MCM7_HUMAN Isoform 2 of DNA replication licensing fac	81.307	719	0	0	0	0	0	0	0	0	0	0	0	0	0	0	0	0	0	0	242320000				174	118;230;307;492;555;571;725;981;1289;1302;1521;1560;1618;1619;1669;1682;1722;1734;1902;2185	True;True;True;True;True;True;True;True;True;True;True;True;True;True;True;True;True;True;True;True	119;236;316;510;574;590;746;1008;1330;1351;1352;1584;1624;1684;1685;1735;1748;1788;1800;1974;2273	358;752;753;1053;1757;2076;2077;2078;2110;2111;2792;2793;4232;4233;5883;5884;5988;5989;5990;5991;5992;6856;7025;7026;7576;7577;7578;7579;7580;7846;7847;7848;7940;8143;8144;8145;8164;8165;8859;8860;10025	424;917;918;1255;1256;2102;2604;2605;2606;2638;2639;3581;3582;5598;5599;8028;8029;8164;8165;8166;8167;8168;9199;9416;9417;10197;10198;10199;10200;10201;10532;10533;10534;10678;10985;10986;10987;11007;11008;11952;11953;13548	424;917;1256;2102;2605;2638;3582;5599;8029;8168;9199;9416;10197;10200;10534;10678;10985;11007;11953;13548	64		621
P33992	P33992	DNA replication licensing factor MCM5	MCM5	sp|P33992|MCM5_HUMAN DNA replication licensing factor MCM5 OS=Homo sapiens GN=MCM5 PE=1 SV=5	82.285	734	0	0	0	0	0	0	0	0	0	0	0	0	0	0	0	0	0	0	357060000				173	74;81;722;883;979;1166;1172;1417;1517;1607;1637;1660;2062	True;True;True;True;True;True;True;True;True;True;True;True;True	74;81;743;909;1006;1199;1205;1476;1580;1671;1703;1726;2144	222;223;237;238;2771;3839;3840;3841;4222;4223;4224;4225;5211;5212;5213;5214;5215;5216;5229;6489;6848;6849;6850;7544;7545;7634;7635;7636;7637;7638;7639;7812;7813;7814;9513;9514;9515;9516;9517;9518	252;253;267;268;3548;5022;5023;5024;5588;5589;5590;5591;6975;6976;6977;6978;6979;6980;6997;8757;9191;9192;9193;10160;10161;10270;10271;10272;10273;10274;10275;10493;10494;10495;12906;12907;12908;12909;12910;12911	252;268;3548;5022;5589;6976;6997;8757;9192;10160;10272;10494;12908
P31025;Q5VSP4	P31025	Lipocalin-1	LCN1	sp|P31025|LCN1_HUMAN Lipocalin-1 OS=Homo sapiens GN=LCN1 PE=1 SV=1	19.25	176	0	0	0	0	0	0	0	0	0	0	0	0	0	0	0	0	0	0	89278000				165	686;1379;1803	True;True;True	705;1436;1871	2596;2597;2598;2599;6363;6364;6365;8488	3321;3322;3323;3324;8617;8618;8619;11471	3321;8618;11471
Q58FF8	Q58FF8	Putative heat shock protein HSP 90-beta 2	HSP90AB2P	sp|Q58FF8|H90B2_HUMAN Putative heat shock protein HSP 90-beta 2 OS=Homo sapiens GN=HSP90AB2P PE=1 SV=2	44.348	381	0	1	5	0	1.8	11.8	0	0	0	0	0	4	0	0	9.4	0	0	0	16674000				317	38;99;403;772;1670;1702;1847;2174;2175;2176;2195	False;False;False;True;False;False;False;False;False;False;False	38;100;417;793;1736;1768;1917;2262;2263;2264;2284	85;86;87;88;89;90;91;92;285;286;1444;1445;1446;1447;3362;3363;7849;7850;7851;7852;7853;7854;7855;8083;8084;8085;8086;8087;8088;8642;9987;9988;9989;9990;9991;9992;9993;9994;9995;9996;9997;9998;9999;10000;10001;10002;10003;10004;10083;10084;10085;10086;10087;10088	88;89;90;91;92;93;94;95;96;97;315;316;317;1749;1750;1751;1752;4443;4444;10535;10536;10537;10538;10539;10540;10541;10922;10923;10924;10925;10926;10927;10928;11636;13506;13507;13508;13509;13510;13511;13512;13513;13514;13515;13516;13517;13518;13519;13520;13521;13522;13523;13524;13525;13526;13625;13626;13627;13628;13629;13630;13631;13632;13633;13634	96;316;1749;4443;10541;10922;11636;13512;13525;13526;13631
Q14697	Q14697	Neutral alpha-glucosidase AB	GANAB	sp|Q14697|GANAB_HUMAN Neutral alpha-glucosidase AB OS=Homo sapiens GN=GANAB PE=1 SV=3	106.87	944	0	0	0	0	0	0	0	0	0	0	0	0	0	0	0	0	0	0	485590000				298	60;248;288;530;682;790;831;1015;1189;1224;1286;1386;1434;1665;1689;1800;2117;2122;2138;2155;2222	True;True;True;True;True;True;True;True;True;True;True;True;True;True;True;True;True;True;True;True;True	60;256;297;549;701;811;852;1042;1222;1257;1325;1326;1443;1494;1731;1755;1868;2203;2209;2226;2243;2312	177;878;879;1012;1944;2588;2589;2590;2591;3395;3519;4378;4379;5309;5310;5311;5704;5705;5706;5859;5860;5861;5862;6385;6554;7822;7823;7824;7825;7826;7827;7998;7999;8000;8465;8466;9700;9701;9702;9724;9725;9726;9727;9728;9804;9805;9806;9807;9808;9871;10216;10217;10218;10219	204;1074;1075;1211;2353;3313;3314;3315;3316;4476;4614;5771;5772;7123;7124;7125;7839;7840;7841;8004;8005;8006;8007;8641;8831;10503;10504;10505;10506;10507;10508;10810;10811;10812;11447;11448;13114;13115;13116;13138;13139;13140;13141;13142;13228;13229;13230;13231;13232;13310;13788;13789;13790;13791	204;1074;1211;2353;3314;4476;4614;5771;7123;7839;8006;8641;8831;10504;10810;11448;13115;13139;13231;13310;13791	95;96		338;339
P54886-2;P54886	P54886-2;P54886	Delta-1-pyrroline-5-carboxylate synthase;Glutamate 5-kinase;Gamma-glutamyl phosphate reductase	ALDH18A1	sp|P54886-2|P5CS_HUMAN Isoform Short of Delta-1-pyrroline-5-carboxylate synthase OS=Homo sapiens GN=ALDH18A1;sp|P54886|P5CS_HUMAN Delta-1-pyrroline-5-carboxylate synthase OS=Homo sapiens GN=ALDH18A1 PE=1 SV=2	87.088	793	0	0	0	0	0	0	0	0	0	0	0	0	0	0	0	0	0	0	313860000				215	269;345;346;443;698;995;1063;1153;1273;1281;1450;1484;2019;2114;2207	True;True;True;True;True;True;True;True;True;True;True;True;True;True;True	277;357;358;458;717;1022;1092;1185;1310;1319;1320;1510;1546;2100;2200;2296	935;936;937;1194;1195;1196;1592;1593;1594;2630;2631;2632;4318;4319;4320;4781;5180;5181;5182;5834;5835;5848;5849;5850;5851;5852;6584;6585;6720;6721;6722;6723;9389;9390;9391;9689;10152;10153;10154;10155	1132;1133;1134;1420;1421;1422;1913;1914;1915;3356;3357;3358;5701;5702;5703;6323;6942;6943;6944;7979;7980;7993;7994;7995;7996;7997;8863;8864;9037;9038;9039;9040;12766;12767;12768;13101;13706;13707;13708;13709	1133;1421;1422;1913;3357;5702;6323;6943;7980;7993;8864;9038;12767;13101;13706	76		374
P08195-2;P08195-3;P08195;P08195-4	P08195-2;P08195-3;P08195;P08195-4	4F2 cell-surface antigen heavy chain	SLC3A2	sp|P08195-2|4F2_HUMAN Isoform 2 of 4F2 cell-surface antigen heavy chain OS=Homo sapiens GN=SLC3A2;sp|P08195-3|4F2_HUMAN Isoform 3 of 4F2 cell-surface antigen heavy chain OS=Homo sapiens GN=SLC3A2;sp|P08195|4F2_HUMAN 4F2 cell-surface antigen heavy chain OS=	57.944	529	0	0	0	0	0	0	0	0	0	0	0	0	0	0	0	0	0	0	92199000				104	39;356;624;813;1957;2029	True;True;True;True;True;True	39;368;643;834;2036;2110	93;94;1252;2359;3459;3460;9076;9077;9078;9079;9408;9409;9410	98;99;1500;3030;4554;4555;12198;12199;12200;12201;12785;12786;12787	98;1500;3030;4555;12198;12787
P05109	P05109	Protein S100-A8;Protein S100-A8, N-terminally processed	S100A8	sp|P05109|S10A8_HUMAN Protein S100-A8 OS=Homo sapiens GN=S100A8 PE=1 SV=1	10.834	93	0	0	0	0	0	0	0	0	0	1	0	0	11.8	0	0	953900	0	0	23284000				90	1113	TRUE	1142	5024;5025;5026;5027	6756;6757;6758;6759	6759
Q14697-2	Q14697-2	Neutral alpha-glucosidase AB	GANAB	sp|Q14697-2|GANAB_HUMAN Isoform 2 of Neutral alpha-glucosidase AB OS=Homo sapiens GN=GANAB	109.44	966	0	0	0	0	0	0	0	0	0	0	0	0	0	0	0	0	0	0	2102700				299	60;248;288;530;682;790;831;1015;1189;1224;1286;1386;1434;1479;1665;1689;1800;2122;2138;2155;2222	False;False;False;False;False;False;False;False;False;False;False;False;False;True;False;False;False;False;False;False;False	60;256;297;549;701;811;852;1042;1222;1257;1325;1326;1443;1494;1541;1731;1755;1868;2209;2226;2243;2312	177;878;879;1012;1944;2588;2589;2590;2591;3395;3519;4378;4379;5309;5310;5311;5704;5705;5706;5859;5860;5861;5862;6385;6554;6695;7822;7823;7824;7825;7826;7827;7998;7999;8000;8465;8466;9724;9725;9726;9727;9728;9804;9805;9806;9807;9808;9871;10216;10217;10218;10219	204;1074;1075;1211;2353;3313;3314;3315;3316;4476;4614;5771;5772;7123;7124;7125;7839;7840;7841;8004;8005;8006;8007;8641;8831;9005;10503;10504;10505;10506;10507;10508;10810;10811;10812;11447;11448;13138;13139;13140;13141;13142;13228;13229;13230;13231;13232;13310;13788;13789;13790;13791	204;1074;1211;2353;3314;4476;4614;5771;7123;7839;8006;8641;8831;9005;10504;10810;11448;13139;13231;13310;13791	95;96		360;361
Q9NZT1	Q9NZT1	Calmodulin-like protein 5	CALML5	sp|Q9NZT1|CALL5_HUMAN Calmodulin-like protein 5 OS=Homo sapiens GN=CALML5 PE=1 SV=2	15.892	146	0	0	0	0	0	0	0	0	0	0	0	0	0	0	0	0	0	0	50319000				387	63;67;1366	True;True;True	63;67;1420	186;197;198;199;200;6277	213;224;225;226;227;8516	213;224;8516
Q16891-2;Q16891-4;Q16891;Q16891-3	Q16891-2;Q16891-4;Q16891;Q16891-3	MICOS complex subunit MIC60	IMMT	sp|Q16891-2|MIC60_HUMAN Isoform 2 of MICOS complex subunit MIC60 OS=Homo sapiens GN=IMMT;sp|Q16891-4|MIC60_HUMAN Isoform 4 of MICOS complex subunit MIC60 OS=Homo sapiens GN=IMMT;sp|Q16891|MIC60_HUMAN MICOS complex subunit MIC60 OS=Homo sapiens GN=IMMT PE=1	82.624	747	0	0	0	0	0	0	0	0	0	0	0	0	0	0	0	0	0	0	74362000				313	14;411;460;661;1187;1620;1625;2143;2227	True;True;True;True;True;True;True;True;True	14;425;476;680;1220;1686;1691;2231;2317	32;1477;1657;1658;2546;5302;5303;7581;7582;7583;7596;7597;9820;9821;9822;10224	35;1788;1985;1986;1987;3271;7116;7117;10202;10203;10204;10217;10218;13244;13245;13246;13796	35;1788;1987;3271;7116;10203;10218;13245;13796
Q13206	Q13206	Probable ATP-dependent RNA helicase DDX10	DDX10	sp|Q13206|DDX10_HUMAN Probable ATP-dependent RNA helicase DDX10 OS=Homo sapiens GN=DDX10 PE=1 SV=2	100.89	875	0	0	0	0	0	0	0	0	0	0	0	0	0	0	0	0	0	0	46254000				283	26;150;409;684;955;1543;1544;1725;2202	True;True;True;True;True;True;True;True;True	26;153;423;703;982;1606;1607;1791;2291	59;60;434;435;436;437;1471;2593;4078;6969;6970;6971;8148;8149;10110	62;63;500;501;502;503;1781;3318;5355;9355;9356;9357;10990;10991;13658	63;501;1781;3318;5355;9355;9356;10990;13658
P28331-3;P28331-4;P28331-5;P28331;P28331-2	P28331-3;P28331-4;P28331-5;P28331;P28331-2	NADH-ubiquinone oxidoreductase 75 kDa subunit, mitochondrial	NDUFS1	sp|P28331-3|NDUS1_HUMAN Isoform 3 of NADH-ubiquinone oxidoreductase 75 kDa subunit, mitochondrial OS=Homo sapiens GN=NDUFS1;sp|P28331-4|NDUS1_HUMAN Isoform 4 of NADH-ubiquinone oxidoreductase 75 kDa subunit, mitochondrial OS=Homo sapiens GN=NDUFS1;sp|P2833	67.524	616	0	0	0	0	0	0	0	0	0	0	0	0	0	0	0	0	0	0	48455000				161	509;520;784;858;961;1316;1400	True;True;True;True;True;True;True	527;538;805;884;988;1366;1459	1817;1818;1819;1874;1875;3384;3385;3774;4101;6028;6029;6445	2185;2186;2187;2279;2280;4465;4466;4956;5395;8210;8211;8701	2187;2279;4465;4956;5395;8210;8701
P43243;P43243-2	P43243;P43243-2	Matrin-3	MATR3	sp|P43243|MATR3_HUMAN Matrin-3 OS=Homo sapiens GN=MATR3 PE=1 SV=2;sp|P43243-2|MATR3_HUMAN Isoform 2 of Matrin-3 OS=Homo sapiens GN=MATR3	94.622	847	0	0	0	0	0	0	0	0	0	0	0	0	0	0	0	0	0	0	115250000				191	304;519;609;693;695;1008;1639;1726;1812;2028;2137	True;True;True;True;True;True;True;True;True;True;True	313;537;628;712;714;1035;1705;1792;1880;2109;2225	1048;1049;1871;1872;1873;2314;2620;2621;2622;2623;2624;2626;2627;4360;7642;7643;7644;7645;7646;8150;8151;8519;8520;8521;8522;8523;8524;9407;9801;9802;9803	1250;1251;2276;2277;2278;2981;3345;3346;3347;3348;3349;3351;3352;3353;5752;10278;10279;10280;10281;10282;10992;10993;11508;11509;11510;11511;11512;11513;12784;13225;13226;13227	1251;2277;2981;3347;3351;5752;10280;10993;11509;12784;13226
P61626	P61626	Lysozyme C	LYZ	sp|P61626|LYSC_HUMAN Lysozyme C OS=Homo sapiens GN=LYZ PE=1 SV=1	16.537	148	0	0	0	0	0	0	0	0	0	0	0	0	0	0	0	0	0	0	127820000				226	667;1759	True;True	686;1826	2557;8311;8312;8313;8314;8315;8316	3282;11263;11264;11265;11266;11267;11268	3282;11263
P27824;P27824-2;P27824-3	P27824;P27824-2;P27824-3	Calnexin	CANX	sp|P27824|CALX_HUMAN Calnexin OS=Homo sapiens GN=CANX PE=1 SV=2;sp|P27824-2|CALX_HUMAN Isoform 2 of Calnexin OS=Homo sapiens GN=CANX;sp|P27824-3|CALX_HUMAN Isoform 3 of Calnexin OS=Homo sapiens GN=CANX	67.567	592	0	0	0	0	0	0	0	0	0	0	0	0	0	0	0	0	0	0	88275000				160	49;157;390;882;925;951;1440;1897	True;True;True;True;True;True;True;True	49;161;403;908;951;978;1500;1969	139;140;141;516;517;1388;3838;4005;4069;4070;4071;6567;6568;6569;8848	162;163;164;624;625;1670;5021;5275;5346;5347;5348;8846;8847;8848;11941	162;624;1670;5021;5275;5348;8846;11941
P46087;P46087-4;P46087-2;P46087-3	P46087;P46087-4;P46087-2;P46087-3	Probable 28S rRNA (cytosine(4447)-C(5))-methyltransferase	NOP2	sp|P46087|NOP2_HUMAN Probable 28S rRNA (cytosine(4447)-C(5))-methyltransferase OS=Homo sapiens GN=NOP2 PE=1 SV=2;sp|P46087-4|NOP2_HUMAN Isoform 4 of Probable 28S rRNA (cytosine(4447)-C(5))-methyltransferase OS=Homo sapiens GN=NOP2;sp|P46087-2|NOP2_HUMAN Is	89.301	812	0	0	0	0	0	0	0	0	0	0	0	0	0	0	0	0	0	0	68368000				195	265;554;601;666;696;1066;1240;1414	True;True;True;True;True;True;True;True	273;573;620;685;715;1095;1273;1473	928;929;2072;2073;2074;2075;2294;2295;2554;2555;2556;2628;4785;4786;5760;6480;6481;6482;6483;6484	1125;1126;2600;2601;2602;2603;2960;2961;3279;3280;3281;3354;6327;6328;7901;8748;8749;8750;8751;8752	1126;2600;2961;3281;3354;6327;7901;8752
O75909;O75909-4;O75909-2;O75909-1	O75909;O75909-4;O75909-2;O75909-1	Cyclin-K	CCNK	sp|O75909|CCNK_HUMAN Cyclin-K OS=Homo sapiens GN=CCNK PE=1 SV=2;sp|O75909-4|CCNK_HUMAN Isoform 4 of Cyclin-K OS=Homo sapiens GN=CCNK;sp|O75909-2|CCNK_HUMAN Isoform 2 of Cyclin-K OS=Homo sapiens GN=CCNK;sp|O75909-1|CCNK_HUMAN Isoform 3 of Cyclin-K OS=Homo s	64.239	580	0	0	0	0	0	0	0	0	0	0	0	0	0	0	0	0	0	0	18409000				66	264;962	True;True	272;989	927;4102	1124;5396	1124;5396
P14625;Q58FF3	P14625	Endoplasmin	HSP90B1	sp|P14625|ENPL_HUMAN Endoplasmin OS=Homo sapiens GN=HSP90B1 PE=1 SV=1	92.468	803	1	1	2	1.5	1.7	1.7	0	0	0	0	0	2	0	0	1.7	0	0	0	142490000				127	259;339;420;421;505;567;678;741;1065;1073;1661;1802;1818	True;True;False;False;True;True;True;True;True;True;True;True;True	267;351;435;436;523;586;697;762;1094;1102;1727;1870;1886	910;911;912;913;1180;1181;1498;1499;1500;1501;1502;1503;1504;1505;1506;1507;1508;1509;1510;1511;1512;1513;1514;1515;1516;1517;1518;1519;1800;1801;1802;1803;2100;2101;2579;2832;2833;2834;4784;4796;7815;7816;7817;8487;8550	1107;1108;1109;1110;1406;1407;1811;1812;1813;1814;1815;1816;1817;1818;1819;1820;1821;1822;1823;1824;1825;1826;1827;1828;1829;1830;1831;1832;1833;2166;2167;2168;2169;2628;2629;3304;3633;3634;3635;6326;6338;10496;10497;10498;11470;11541	1110;1407;1814;1831;2166;2628;3304;3635;6326;6338;10496;11470;11541
O00571-2;O15523-2;O15523;O00571;O15523-3	O00571-2;O15523-2;O15523;O00571	ATP-dependent RNA helicase DDX3X;ATP-dependent RNA helicase DDX3Y	DDX3X;DDX3Y	sp|O00571-2|DDX3X_HUMAN Isoform 2 of ATP-dependent RNA helicase DDX3X OS=Homo sapiens GN=DDX3X;sp|O15523-2|DDX3Y_HUMAN Isoform 2 of ATP-dependent RNA helicase DDX3Y OS=Homo sapiens GN=DDX3Y;sp|O15523|DDX3Y_HUMAN ATP-dependent RNA helicase DDX3Y OS=Homo sap	71.354	646	0	0	0	0	0	0	0	0	0	0	0	0	0	0	0	0	0	0	25375000				44	1282;1562;1719;2018;2113	False;True;True;True;True	1321;1626;1785;2099;2199	5853;5854;5855;7030;7031;7032;8135;8136;8137;9387;9388;9688	7998;7999;8000;9421;9422;9423;10977;10978;10979;12764;12765;13100	7999;9421;10979;12764;13100
Q92841-1;Q92841-3;Q92841-2;Q92841;P17844-2;P17844	Q92841-1;Q92841-3;Q92841-2;Q92841	Probable ATP-dependent RNA helicase DDX17	DDX17	sp|Q92841-1|DDX17_HUMAN Isoform 2 of Probable ATP-dependent RNA helicase DDX17 OS=Homo sapiens GN=DDX17;sp|Q92841-3|DDX17_HUMAN Isoform 4 of Probable ATP-dependent RNA helicase DDX17 OS=Homo sapiens GN=DDX17;sp|Q92841-2|DDX17_HUMAN Isoform 3 of Probable AT	72.371	650	1	0	0	1.8	0	0	1339400	0	0	0	0	0	0	0	0	0	0	0	56134000				351	147;408;1282;1332;2058	True;True;True;True;True	150;422;1321;1382;2140	425;426;427;428;429;430;1470;5853;5854;5855;6100;9496;9497	491;492;493;494;495;496;1780;7998;7999;8000;8307;12889;12890	494;1780;7999;8307;12890
P13667	P13667	Protein disulfide-isomerase A4	PDIA4	sp|P13667|PDIA4_HUMAN Protein disulfide-isomerase A4 OS=Homo sapiens GN=PDIA4 PE=1 SV=2	72.932	645	0	0	0	0	0	0	0	0	0	0	0	0	0	0	0	0	0	0	17366000				123	273;788;1262	True;True;True	281;809;1298	952;3392;5821	1150;4473;7966	1150;4473;7966
P45880-2;P45880;P45880-1	P45880-2;P45880;P45880-1	Voltage-dependent anion-selective channel protein 2	VDAC2	sp|P45880-2|VDAC2_HUMAN Isoform 2 of Voltage-dependent anion-selective channel protein 2 OS=Homo sapiens GN=VDAC2;sp|P45880|VDAC2_HUMAN Voltage-dependent anion-selective channel protein 2 OS=Homo sapiens GN=VDAC2 PE=1 SV=2;sp|P45880-1|VDAC2_HUMAN Isoform 1	30.412	283	0	0	0	0	0	0	0	0	0	0	0	0	0	0	0	0	0	0	4133200				193	2089	TRUE	2175	9593	12989	12989
Q9NW13-2;Q9NW13	Q9NW13-2;Q9NW13	RNA-binding protein 28	RBM28	sp|Q9NW13-2|RBM28_HUMAN Isoform 2 of RNA-binding protein 28 OS=Homo sapiens GN=RBM28;sp|Q9NW13|RBM28_HUMAN RNA-binding protein 28 OS=Homo sapiens GN=RBM28 PE=1 SV=3	69.922	618	0	0	0	0	0	0	0	0	0	0	0	0	0	0	0	0	0	0	29213000				386	58;224;560;957;1527;1930	True;True;True;True;True;True	58;230;579;984;1590;2005	172;173;174;746;2086;4093;6866;8973	199;200;201;909;2614;5387;9210;12085	200;909;2614;5387;9210;12085
Q01469	Q01469	Fatty acid-binding protein, epidermal	FABP5	sp|Q01469|FABP5_HUMAN Fatty acid-binding protein, epidermal OS=Homo sapiens GN=FABP5 PE=1 SV=3	15.164	135	0	0	0	0	0	0	0	0	0	0	0	0	0	0	0	0	0	0	26182000				260	196;525;526;1248	True;True;True;True	201;543;544;1282	660;1883;1884;1885;1886;5779;5780;5781	803;2288;2289;2290;2291;7920;7921;7922	803;2288;2291;7922
O15226;O15226-2	O15226;O15226-2	NF-kappa-B-repressing factor	NKRF	sp|O15226|NKRF_HUMAN NF-kappa-B-repressing factor OS=Homo sapiens GN=NKRF PE=1 SV=2;sp|O15226-2|NKRF_HUMAN Isoform 2 of NF-kappa-B-repressing factor OS=Homo sapiens GN=NKRF	77.672	690	0	0	0	0	0	0	0	0	0	0	0	0	0	0	0	0	0	0	41572000				50	241;490;612;1136;1300;1632;1879;1900;2031;2160	True;True;True;True;True;True;True;True;True;True	248;508;631;1168;1349;1698;1951;1972;2112;2248	822;1752;1753;2317;2318;5114;5983;5984;7623;7624;8796;8857;9415;9879	1013;2097;2098;2984;2985;6865;8159;8160;10259;10260;11888;11950;12792;13318	1013;2097;2984;6865;8160;10260;11888;11950;12792;13318
Q9BSC4-2;Q9BSC4;Q9BSC4-4	Q9BSC4-2;Q9BSC4;Q9BSC4-4	Nucleolar protein 10	NOL10	sp|Q9BSC4-2|NOL10_HUMAN Isoform 2 of Nucleolar protein 10 OS=Homo sapiens GN=NOL10;sp|Q9BSC4|NOL10_HUMAN Nucleolar protein 10 OS=Homo sapiens GN=NOL10 PE=1 SV=1;sp|Q9BSC4-4|NOL10_HUMAN Isoform 4 of Nucleolar protein 10 OS=Homo sapiens GN=NOL10	74.508	638	0	0	0	0	0	0	0	0	0	0	0	0	0	0	0	0	0	0	7666100				372	251;1070;1110;1271	True;True;True;True	259;1099;1139;1308	882;883;4791;4792;5016;5832	1078;1079;6333;6334;6748;7977	1078;6334;6748;7977	104		286
P07355;P07355-2;A6NMY6	P07355;P07355-2;A6NMY6	Annexin A2;Putative annexin A2-like protein	ANXA2;ANXA2P2	sp|P07355|ANXA2_HUMAN Annexin A2 OS=Homo sapiens GN=ANXA2 PE=1 SV=2;sp|P07355-2|ANXA2_HUMAN Isoform 2 of Annexin A2 OS=Homo sapiens GN=ANXA2;sp|A6NMY6|AXA2L_HUMAN Putative annexin A2-like protein OS=Homo sapiens GN=ANXA2P2 PE=5 SV=2	38.604	339	0	1	0	0	2.7	0	0	1021400	0	0	0	0	0	0	0	0	0	0	36256000				98	1456;1563;1709;1772;1886	True;True;True;True;True	1516;1627;1775;1840;1958	6617;6618;6619;6620;6621;7033;7034;8111;8369;8817;8818	8915;8916;8917;8918;8919;9424;9425;10953;11333;11909;11910	8915;9425;10953;11333;11910
Q99798	Q99798	Aconitate hydratase, mitochondrial	ACO2	sp|Q99798|ACON_HUMAN Aconitate hydratase, mitochondrial OS=Homo sapiens GN=ACO2 PE=1 SV=2	85.424	780	0	0	0	0	0	0	0	0	0	0	0	0	0	0	0	0	0	0	29529000				369	928;1314;1728;2154	True;True;True;True	954;1364;1794;2242	4009;6024;6025;6026;8153;8154;9870	5279;8206;8207;8208;10995;10996;13309	5279;8208;10996;13309
Q9H0D6-2;Q9H0D6	Q9H0D6-2;Q9H0D6	5-3 exoribonuclease 2	XRN2	sp|Q9H0D6-2|XRN2_HUMAN Isoform 2 of 5-3 exoribonuclease 2 OS=Homo sapiens GN=XRN2;sp|Q9H0D6|XRN2_HUMAN 5-3 exoribonuclease 2 OS=Homo sapiens GN=XRN2 PE=1 SV=1	99.96	874	0	0	0	0	0	0	0	0	0	0	0	0	0	0	0	0	0	0	29896000				378	10;296;1368;1405;1408	True;True;True;True;True	10;305;1422;1464;1467	23;24;1027;6280;6281;6463;6466;6467	25;26;1226;8519;8520;8731;8734;8735	25;1226;8519;8731;8734
Q12788	Q12788	Transducin beta-like protein 3	TBL3	sp|Q12788|TBL3_HUMAN Transducin beta-like protein 3 OS=Homo sapiens GN=TBL3 PE=1 SV=2	89.034	808	0	0	0	0	0	0	0	0	0	0	0	0	0	0	0	0	0	0	28317000				279	9;325;326;729;1011;1118;1412;1718	True;True;True;True;True;True;True;True	9;336;337;750;1038;1147;1471;1784	21;22;1129;1130;2815;2816;4366;4367;5034;6473;8134	23;24;1346;1347;3616;3617;5759;5760;6766;8741;10976	24;1346;1347;3616;5760;6766;8741;10976
Q7L590-2;Q7L590	Q7L590-2;Q7L590	Protein MCM10 homolog	MCM10	sp|Q7L590-2|MCM10_HUMAN Isoform 2 of Protein MCM10 homolog OS=Homo sapiens GN=MCM10;sp|Q7L590|MCM10_HUMAN Protein MCM10 homolog OS=Homo sapiens GN=MCM10 PE=1 SV=2	98.083	874	0	0	0	0	0	0	0	0	0	0	0	0	0	0	0	0	0	0	34004000				332	456;556;1299;1876	True;True;True;True	472;575;1347;1348;1948	1643;2079;2080;2081;2082;5980;5981;5982;8792	1968;2607;2608;2609;2610;8156;8157;8158;11884	1968;2610;8157;11884	99		206
P11586	P11586	C-1-tetrahydrofolate synthase, cytoplasmic;Methylenetetrahydrofolate dehydrogenase;Methenyltetrahydrofolate cyclohydrolase;Formyltetrahydrofolate synthetase;C-1-tetrahydrofolate synthase, cytoplasmic, N-terminally processed	MTHFD1	sp|P11586|C1TC_HUMAN C-1-tetrahydrofolate synthase, cytoplasmic OS=Homo sapiens GN=MTHFD1 PE=1 SV=3	101.56	935	0	0	0	0	0	0	0	0	0	0	0	0	0	0	0	0	0	0	450560000				118	18;212;392;458;569;605;738;809;910;931;952;975;1012;1239;1805;1806;1896;2067;2236	True;True;True;True;True;True;True;True;True;True;True;True;True;True;True;True;True;True;True	18;217;405;474;588;624;759;830;936;957;979;1002;1039;1272;1873;1874;1968;2149;2327	37;697;698;1408;1654;2106;2107;2301;2302;2303;2304;2305;2828;2829;3442;3443;3444;3445;3446;3979;3980;4013;4014;4015;4072;4073;4200;4368;4369;4370;4371;5758;5759;8490;8491;8492;8493;8494;8495;8496;8497;8498;8844;8845;8846;8847;9528;9529;10248;10249;10250;10251;10252;10253	40;841;842;1712;1713;1982;2634;2635;2968;2969;2970;2971;2972;3629;3630;4536;4537;4538;4539;4540;4541;5247;5248;5283;5284;5285;5349;5350;5548;5761;5762;5763;5764;7899;7900;11473;11474;11475;11476;11477;11478;11479;11480;11481;11482;11937;11938;11939;11940;12921;12922;13822;13823;13824;13825;13826;13827	40;841;1713;1982;2634;2969;3629;4536;5248;5283;5350;5548;5764;7900;11475;11478;11938;12921;13825
Q01813;Q01813-2	Q01813;Q01813-2	ATP-dependent 6-phosphofructokinase, platelet type	PFKP	sp|Q01813|PFKAP_HUMAN ATP-dependent 6-phosphofructokinase, platelet type OS=Homo sapiens GN=PFKP PE=1 SV=2;sp|Q01813-2|PFKAP_HUMAN Isoform 2 of ATP-dependent 6-phosphofructokinase, platelet type OS=Homo sapiens GN=PFKP	85.595	784	0	0	0	0	0	0	0	0	0	0	0	0	0	0	0	0	0	0	2325200				262	89;828	False;True	89;849	258;259;260;3515	288;289;290;4610	288;4610
Q96FV9	Q96FV9	THO complex subunit 1	THOC1	sp|Q96FV9|THOC1_HUMAN THO complex subunit 1 OS=Homo sapiens GN=THOC1 PE=1 SV=1	75.665	657	0	0	0	0	0	0	0	0	0	0	0	0	0	0	0	0	0	0	3817600				358	263;1781	True;True	271;1849	926;8385	1123;11349	1123;11349
Q8NEV1;P68400	Q8NEV1;P68400	Casein kinase II subunit alpha 3;Casein kinase II subunit alpha	CSNK2A3;CSNK2A1	sp|Q8NEV1|CSK23_HUMAN Casein kinase II subunit alpha 3 OS=Homo sapiens GN=CSNK2A3 PE=1 SV=2;sp|P68400|CSK21_HUMAN Casein kinase II subunit alpha OS=Homo sapiens GN=CSNK2A1 PE=1 SV=1	45.219	391	0	0	0	0	0	0	0	0	0	0	0	0	0	0	0	0	0	0	1067800				246	649	TRUE	668	2452	3151	3151
Q68D10-2;Q68D10	Q68D10-2;Q68D10	Protein SPT2 homolog	SPTY2D1	sp|Q68D10-2|SPT2_HUMAN Isoform 2 of Protein SPT2 homolog OS=Homo sapiens GN=SPTY2D1;sp|Q68D10|SPT2_HUMAN Protein SPT2 homolog OS=Homo sapiens GN=SPTY2D1 PE=1 SV=3	74.229	673	0	0	0	0	0	0	0	0	0	0	0	0	0	0	0	0	0	0	24979000				325	1520;1939;1940	True;True;True	1583;2015;2016	6855;9033;9034;9035	9198;12154;12155;12156	9198;12154;12156
P31944	P31944	Caspase-14;Caspase-14 subunit p17, mature form;Caspase-14 subunit p10, mature form;Caspase-14 subunit p20, intermediate form;Caspase-14 subunit p8, intermediate form	CASP14	sp|P31944|CASPE_HUMAN Caspase-14 OS=Homo sapiens GN=CASP14 PE=1 SV=2	27.679	242	0	2	0	0	7.9	0	0	3968300	0	0	0	0	0	0	0	0	0	0	74641000				169	566;972;1036;1257;1569;1878	True;True;True;True;True;True	585;999;1065;1291;1292;1633;1950	2098;2099;4158;4455;5805;5806;5807;5808;5809;5810;5811;7050;8795	2626;2627;5487;5869;7950;7951;7952;7953;7954;7955;7956;9442;11887	2626;5487;5869;7952;9442;11887	62		213
O60331-4;O60331;O60331-2;O60331-3;Q99755-2;O14986-3;Q99755-4;O14986;Q99755-3;O14986-2;Q99755	O60331-4;O60331;O60331-2;O60331-3	Phosphatidylinositol 4-phosphate 5-kinase type-1 gamma	PIP5K1C	sp|O60331-4|PI51C_HUMAN Isoform 4 of Phosphatidylinositol 4-phosphate 5-kinase type-1 gamma OS=Homo sapiens GN=PIP5K1C;sp|O60331|PI51C_HUMAN Phosphatidylinositol 4-phosphate 5-kinase type-1 gamma OS=Homo sapiens GN=PIP5K1C PE=1 SV=2;sp|O60331-2|PI51C_HUMAN	70.213	640	0	0	0	0	0	0	0	0	0	0	0	0	0	0	0	0	0	0	72831000				58	138;559;599;637;730;1123;2145	True;True;True;True;True;True;True	141;578;618;656;751;1152;1153;2233	400;401;402;403;404;2085;2291;2292;2398;2399;2817;5046;5047;5048;5049;5050;9825	466;467;468;469;470;2613;2957;2958;3073;3074;3618;6778;6779;6780;6781;6782;13249	470;2613;2958;3074;3618;6778;13249	35		207
Q9UG63;Q9UG63-2	Q9UG63;Q9UG63-2	ATP-binding cassette sub-family F member 2	ABCF2	sp|Q9UG63|ABCF2_HUMAN ATP-binding cassette sub-family F member 2 OS=Homo sapiens GN=ABCF2 PE=1 SV=2;sp|Q9UG63-2|ABCF2_HUMAN Isoform 2 of ATP-binding cassette sub-family F member 2 OS=Homo sapiens GN=ABCF2	71.289	623	0	0	0	0	0	0	0	0	0	0	0	0	0	0	0	0	0	0	24680000				392	475;852;885;1029;1137;1226;1285;1962	True;True;True;True;True;True;True;True	491;877;911;1058;1169;1259;1324;2041	1693;1694;3753;3843;4429;4430;4431;5115;5715;5858;9093	2028;2029;4931;5026;5830;5831;5832;6866;7850;8003;12216	2028;4931;5026;5830;6866;7850;8003;12216	106;107		366;367
Q13200;Q13200-3;Q13200-2	Q13200;Q13200-3;Q13200-2	26S proteasome non-ATPase regulatory subunit 2	PSMD2	sp|Q13200|PSMD2_HUMAN 26S proteasome non-ATPase regulatory subunit 2 OS=Homo sapiens GN=PSMD2 PE=1 SV=3;sp|Q13200-3|PSMD2_HUMAN Isoform 3 of 26S proteasome non-ATPase regulatory subunit 2 OS=Homo sapiens GN=PSMD2;sp|Q13200-2|PSMD2_HUMAN Isoform 2 of 26S pr	100.2	908	0	0	0	0	0	0	0	0	0	0	0	0	0	0	0	0	0	0	83661000				282	158;535;1229;1635;1842;2015	True;True;True;True;True;True	162;554;1262;1701;1912;2096	518;519;1960;1961;1962;1963;1964;1965;5719;5720;7630;7631;7632;8617;9380;9381;9382;9383	626;627;2369;2370;2371;2372;2373;2374;7854;7855;10266;10267;10268;11609;12757;12758;12759;12760	627;2374;7854;10267;11609;12760
Q8N1F7;Q8N1F7-2	Q8N1F7;Q8N1F7-2	Nuclear pore complex protein Nup93	NUP93	sp|Q8N1F7|NUP93_HUMAN Nuclear pore complex protein Nup93 OS=Homo sapiens GN=NUP93 PE=1 SV=2;sp|Q8N1F7-2|NUP93_HUMAN Isoform 2 of Nuclear pore complex protein Nup93 OS=Homo sapiens GN=NUP93	93.487	819	0	0	0	0	0	0	0	0	0	0	0	0	0	0	0	0	0	0	45910000				338	281;1135;1152;1238;1362;1751;2023	True;True;True;True;True;True;True	290;1167;1184;1271;1416;1817;2104	977;5113;5179;5755;5756;5757;6270;6271;6272;6273;8282;8283;9398;9399;9400	1175;6864;6941;7896;7897;7898;8509;8510;8511;8512;11232;11233;12775;12776;12777	1175;6864;6941;7897;8512;11233;12776
Q5BKZ1;Q5BKZ1-3	Q5BKZ1;Q5BKZ1-3	DBIRD complex subunit ZNF326	ZNF326	sp|Q5BKZ1|ZN326_HUMAN DBIRD complex subunit ZNF326 OS=Homo sapiens GN=ZNF326 PE=1 SV=2;sp|Q5BKZ1-3|ZN326_HUMAN Isoform 3 of DBIRD complex subunit ZNF326 OS=Homo sapiens GN=ZNF326	65.653	582	0	0	0	0	0	0	0	0	0	0	0	0	0	0	0	0	0	0	26233000				318	472;536;1529;1656	True;True;True;True	488;555;1592;1722	1686;1966;6868;7725;7726	2021;2375;9212;10383;10384	2021;2375;9212;10383
Q8IXB1;Q8IXB1-2;Q8IXB1-3	Q8IXB1;Q8IXB1-2	DnaJ homolog subfamily C member 10	DNAJC10	sp|Q8IXB1|DJC10_HUMAN DnaJ homolog subfamily C member 10 OS=Homo sapiens GN=DNAJC10 PE=1 SV=2;sp|Q8IXB1-2|DJC10_HUMAN Isoform 2 of DnaJ homolog subfamily C member 10 OS=Homo sapiens GN=DNAJC10	91.079	793	0	0	0	0	0	0	0	0	0	0	0	0	0	0	0	0	0	0	68984000				336	80;484;812;1331;1402;1973	True;True;True;True;True;True	80;502;833;1381;1461;2054	236;1730;3455;3456;3457;3458;6095;6096;6097;6098;6099;6448;6449;6450;6451;9275	266;2075;4550;4551;4552;4553;8302;8303;8304;8305;8306;8704;8705;8706;8707;12642	266;2075;4550;8302;8707;12642
P05023-3;P05023-4;P05023;P13637;P13637-2;P13637-3;P05023-2;P50993;Q13733;P20648;P54707;P54707-2	P05023-3;P05023-4;P05023;P13637;P13637-2;P13637-3;P05023-2;P50993	Sodium/potassium-transporting ATPase subunit alpha-1;Sodium/potassium-transporting ATPase subunit alpha-3;Sodium/potassium-transporting ATPase subunit alpha-2	ATP1A1;ATP1A3;ATP1A2	sp|P05023-3|AT1A1_HUMAN Isoform 3 of Sodium/potassium-transporting ATPase subunit alpha-1 OS=Homo sapiens GN=ATP1A1;sp|P05023-4|AT1A1_HUMAN Isoform 4 of Sodium/potassium-transporting ATPase subunit alpha-1 OS=Homo sapiens GN=ATP1A1;sp|P05023|AT1A1_HUMAN So	109.55	992	0	0	0	0	0	0	0	0	0	0	0	0	0	0	0	0	0	0	94802000				87	197;735;1074;1149;1717;1978;2033	True;True;True;True;True;True;True	202;756;1103;1181;1783;2059;2114	661;662;663;2823;2824;4797;4798;5171;5172;5173;8129;8130;8131;8132;8133;9290;9417;9418;9419	804;805;806;3624;3625;6339;6340;6933;6934;6935;10971;10972;10973;10974;10975;12659;12794;12795;12796	804;3624;6340;6935;10974;12659;12795
P31689-2;P31689	P31689-2;P31689	DnaJ homolog subfamily A member 1	DNAJA1	sp|P31689-2|DNJA1_HUMAN Isoform 2 of DnaJ homolog subfamily A member 1 OS=Homo sapiens GN=DNAJA1;sp|P31689|DNJA1_HUMAN DnaJ homolog subfamily A member 1 OS=Homo sapiens GN=DNAJA1 PE=1 SV=2	37.044	331	0	0	0	0	0	0	0	0	0	0	0	0	0	0	0	0	0	0	20210000				167	442;1490	True;True	457;1552	1591;6774;6775	1912;9111;9112	1912;9111
P17858;P17858-2	P17858;P17858-2	ATP-dependent 6-phosphofructokinase, liver type	PFKL	sp|P17858|PFKAL_HUMAN ATP-dependent 6-phosphofructokinase, liver type OS=Homo sapiens GN=PFKL PE=1 SV=6;sp|P17858-2|PFKAL_HUMAN Isoform 2 of ATP-dependent 6-phosphofructokinase, liver type OS=Homo sapiens GN=PFKL	85.018	780	0	0	0	0	0	0	0	0	0	0	0	0	0	0	0	0	0	0	28359000				137	89;703;869;1884	True;True;True;True	89;722;895;1956	258;259;260;2661;2662;2663;3808;8814	288;289;290;3398;3399;3400;4991;11906	288;3399;4991;11906
P31943;P55795	P31943;P55795	Heterogeneous nuclear ribonucleoprotein H;Heterogeneous nuclear ribonucleoprotein H, N-terminally processed;Heterogeneous nuclear ribonucleoprotein H2	HNRNPH1;HNRNPH2	sp|P31943|HNRH1_HUMAN Heterogeneous nuclear ribonucleoprotein H OS=Homo sapiens GN=HNRNPH1 PE=1 SV=4;sp|P55795|HNRH2_HUMAN Heterogeneous nuclear ribonucleoprotein H2 OS=Homo sapiens GN=HNRNPH2 PE=1 SV=1	49.229	449	0	0	0	0	0	0	0	0	0	0	0	0	0	0	0	0	0	0	16999000				168	683;775;1762	True;True;True	702;796;1829	2592;3373;8323	3317;4454;11275	3317;4454;11275
Q9UBT2;Q9UBT2-2	Q9UBT2;Q9UBT2-2	SUMO-activating enzyme subunit 2	UBA2	sp|Q9UBT2|SAE2_HUMAN SUMO-activating enzyme subunit 2 OS=Homo sapiens GN=UBA2 PE=1 SV=2;sp|Q9UBT2-2|SAE2_HUMAN Isoform 2 of SUMO-activating enzyme subunit 2 OS=Homo sapiens GN=UBA2	71.223	640	0	0	0	0	0	0	0	0	0	0	0	0	0	0	0	0	0	0	54001000				391	406;1419;1474;2081;2134	True;True;True;True;True	420;1478;1536;2163;2222	1465;1466;1467;1468;6492;6679;6680;6681;9552;9793;9794	1775;1776;1777;1778;8760;8989;8990;8991;12945;13216;13217	1778;8760;8990;12945;13216
Q15517	Q15517	Corneodesmosin	CDSN	sp|Q15517|CDSN_HUMAN Corneodesmosin OS=Homo sapiens GN=CDSN PE=1 SV=3	51.522	529	0	0	0	0	0	0	0	0	0	0	0	0	0	0	0	0	0	0	72786000				310	719;830	True;True	740;851	2763;2764;2765;2766;2767;3517;3518	3540;3541;3542;3543;3544;4612;4613	3541;4613
Q00325-2;Q00325	Q00325-2;Q00325	Phosphate carrier protein, mitochondrial	SLC25A3	sp|Q00325-2|MPCP_HUMAN Isoform B of Phosphate carrier protein, mitochondrial OS=Homo sapiens GN=SLC25A3;sp|Q00325|MPCP_HUMAN Phosphate carrier protein, mitochondrial OS=Homo sapiens GN=SLC25A3 PE=1 SV=2	39.958	361	0	0	0	0	0	0	0	0	0	0	0	0	0	0	0	0	0	0	11849000				255	895	TRUE	921	3880;3881;3882;3883	5107;5108;5109;5110	5108
Q12906-5;Q12906-4;Q12906-2;Q12906-6;Q12906-3;Q12906;Q12906-7	Q12906-5;Q12906-4;Q12906-2;Q12906-6;Q12906-3;Q12906;Q12906-7	Interleukin enhancer-binding factor 3	ILF3	sp|Q12906-5|ILF3_HUMAN Isoform 5 of Interleukin enhancer-binding factor 3 OS=Homo sapiens GN=ILF3;sp|Q12906-4|ILF3_HUMAN Isoform 4 of Interleukin enhancer-binding factor 3 OS=Homo sapiens GN=ILF3;sp|Q12906-2|ILF3_HUMAN Isoform 2 of Interleukin enhancer-bin	74.606	690	0	0	0	0	0	0	0	0	0	0	0	0	0	0	0	0	0	0	21003000				281	211;359	True;True	216;371	696;1260;1261;1262;1263;1264;1265	840;1508;1509;1510;1511;1512;1513	840;1513
Q5T750	Q5T750	Skin-specific protein 32	XP32	sp|Q5T750|XP32_HUMAN Skin-specific protein 32 OS=Homo sapiens GN=XP32 PE=1 SV=1	26.238	250	1	0	0	3.2	0	0	8936500	0	0	0	0	0	0	0	0	0	0	0	176390000				324	229;1822;1823;1952;2221	True;True;True;True;True	235;1891;1892;2030;2311	751;8559;8560;8561;8562;8563;9066;10213;10214;10215	915;916;11550;11551;11552;11553;11554;11555;12188;13785;13786;13787	916;11552;11554;12188;13785
Q99459	Q99459	Cell division cycle 5-like protein	CDC5L	sp|Q99459|CDC5L_HUMAN Cell division cycle 5-like protein OS=Homo sapiens GN=CDC5L PE=1 SV=2	92.25	802	0	0	0	0	0	0	0	0	0	0	0	0	0	0	0	0	0	0	54948000				365	646;733;1561;1654;2014	True;True;True;True;True	665;754;1625;1720;2095	2448;2449;2821;7027;7028;7029;7718;7719;7720;9377;9378;9379	3147;3148;3622;9418;9419;9420;10376;10377;10378;12754;12755;12756	3147;3622;9418;10378;12754
Q9BVJ6-2;Q9BVJ6-3;Q9BVJ6;Q5TAP6	Q9BVJ6-2;Q9BVJ6-3;Q9BVJ6;Q5TAP6	U3 small nucleolar RNA-associated protein 14 homolog A;U3 small nucleolar RNA-associated protein 14 homolog C	UTP14A;UTP14C	sp|Q9BVJ6-2|UT14A_HUMAN Isoform 2 of U3 small nucleolar RNA-associated protein 14 homolog A OS=Homo sapiens GN=UTP14A;sp|Q9BVJ6-3|UT14A_HUMAN Isoform 3 of U3 small nucleolar RNA-associated protein 14 homolog A OS=Homo sapiens GN=UTP14A;sp|Q9BVJ6|UT14A_HUMA	69.263	603	0	0	0	0	0	0	0	0	0	0	0	0	0	0	0	0	0	0	10821000				374	369;428	True;True	381;443	1308;1309;1546;1547	1557;1558;1861;1862	1557;1862
Q15029-2;Q15029-3;Q15029	Q15029-2;Q15029-3;Q15029	116 kDa U5 small nuclear ribonucleoprotein component	EFTUD2	sp|Q15029-2|U5S1_HUMAN Isoform 2 of 116 kDa U5 small nuclear ribonucleoprotein component OS=Homo sapiens GN=EFTUD2;sp|Q15029-3|U5S1_HUMAN Isoform 3 of 116 kDa U5 small nuclear ribonucleoprotein component OS=Homo sapiens GN=EFTUD2;sp|Q15029|U5S1_HUMAN 116 k	105.38	937	0	0	0	0	0	0	0	0	0	0	0	0	0	0	0	0	0	0	16723000				304	645;846;848;1767;2071	False;True;True;True;True	664;871;873;1835;2153	2447;3744;3745;3747;8354;9533;9534	3146;4922;4923;4925;11313;12926;12927	3146;4923;4925;11313;12927
Q8WTT2	Q8WTT2	Nucleolar complex protein 3 homolog	NOC3L	sp|Q8WTT2|NOC3L_HUMAN Nucleolar complex protein 3 homolog OS=Homo sapiens GN=NOC3L PE=1 SV=1	92.547	800	0	0	0	0	0	0	0	0	0	0	0	0	0	0	0	0	0	0	7449700				344	275;501	True;True	283;519	954;1793;1794	1152;2159;2160	1152;2160
P55884;P55884-2	P55884;P55884-2	Eukaryotic translation initiation factor 3 subunit B	EIF3B	sp|P55884|EIF3B_HUMAN Eukaryotic translation initiation factor 3 subunit B OS=Homo sapiens GN=EIF3B PE=1 SV=3;sp|P55884-2|EIF3B_HUMAN Isoform 2 of Eukaryotic translation initiation factor 3 subunit B OS=Homo sapiens GN=EIF3B	92.48	814	0	0	0	0	0	0	0	0	0	0	0	0	0	0	0	0	0	0	14040000				219	161;514;2127	True;True;True	165;532;2214	522;523;524;1843;1844;1845;9744;9745	630;631;632;2219;2220;2221;13158;13159	631;2219;13159
Q8WUM4;Q8WUM4-2;Q8WUM4-3	Q8WUM4;Q8WUM4-2	Programmed cell death 6-interacting protein	PDCD6IP	sp|Q8WUM4|PDC6I_HUMAN Programmed cell death 6-interacting protein OS=Homo sapiens GN=PDCD6IP PE=1 SV=1;sp|Q8WUM4-2|PDC6I_HUMAN Isoform 2 of Programmed cell death 6-interacting protein OS=Homo sapiens GN=PDCD6IP	96.022	868	0	0	0	0	0	0	0	0	0	0	0	0	0	0	0	0	0	0	98047000				345	312;395;542;1096;1766;1776;1870;1894	True;True;True;True;True;True;True;True	321;408;561;1125;1834;1844;1941;1966	1064;1065;1411;1973;4970;4971;4972;8351;8352;8353;8374;8742;8840;8841;8842	1267;1268;1716;2382;6694;6695;6696;11310;11311;11312;11338;11795;11933;11934;11935	1268;1716;2382;6694;11312;11338;11795;11933
P55786;P55786-2;A6NEC2;A6NEC2-2	P55786;P55786-2	Puromycin-sensitive aminopeptidase	NPEPPS	sp|P55786|PSA_HUMAN Puromycin-sensitive aminopeptidase OS=Homo sapiens GN=NPEPPS PE=1 SV=2;sp|P55786-2|PSA_HUMAN Isoform 2 of Puromycin-sensitive aminopeptidase OS=Homo sapiens GN=NPEPPS	103.28	919	0	0	0	0	0	0	0	0	0	0	0	0	0	0	0	0	0	0	81094000				218	61;73;234;964;1061;1961;2156	True;True;True;True;True;True;True	61;73;240;991;1090;2040;2244	178;179;180;181;182;221;778;779;780;4110;4111;4112;4113;4779;9092;9872;9873;9874;9875	205;206;207;208;209;251;957;958;959;5405;5406;5407;5408;5409;6321;12215;13311;13312;13313;13314	206;251;958;5407;6321;12215;13313
P55060-4;P55060-3;P55060	P55060-4;P55060-3;P55060	Exportin-2	CSE1L	sp|P55060-4|XPO2_HUMAN Isoform 4 of Exportin-2 OS=Homo sapiens GN=CSE1L;sp|P55060-3|XPO2_HUMAN Isoform 3 of Exportin-2 OS=Homo sapiens GN=CSE1L;sp|P55060|XPO2_HUMAN Exportin-2 OS=Homo sapiens GN=CSE1L PE=1 SV=3	103.88	915	0	0	0	0	0	0	0	0	0	0	0	0	0	0	0	0	0	0	34006000				216	5;385;718;2043	True;True;True;True	5;398;739;2125	16;17;1372;2762;9439;9440;9441	18;19;1643;3539;12816;12817;12818	18;1643;3539;12816
P23588-2;P23588	P23588-2;P23588	Eukaryotic translation initiation factor 4B	EIF4B	sp|P23588-2|IF4B_HUMAN Isoform 2 of Eukaryotic translation initiation factor 4B OS=Homo sapiens GN=EIF4B;sp|P23588|IF4B_HUMAN Eukaryotic translation initiation factor 4B OS=Homo sapiens GN=EIF4B PE=1 SV=2	64.805	572	0	0	0	0	0	0	0	0	0	0	0	0	0	0	0	0	0	0	9321900				151	23	TRUE	23	47;48	50;51	51
P52292	P52292	Importin subunit alpha-1	KPNA2	sp|P52292|IMA1_HUMAN Importin subunit alpha-1 OS=Homo sapiens GN=KPNA2 PE=1 SV=1	57.861	529	0	0	0	0	0	0	0	0	0	0	0	0	0	0	0	0	0	0	7286500				210	665;1115	True;True	684;1144	2553;5029	3278;6761	3278;6761
P19338	P19338	Nucleolin	NCL	sp|P19338|NUCL_HUMAN Nucleolin OS=Homo sapiens GN=NCL PE=1 SV=3	76.613	710	0	1	0	0	1.4	0	0	1459100	0	0	0	0	0	0	0	0	0	0	49988000				140	488;631;685;1318	True;True;True;True	506;650;704;1368	1741;1742;1743;2374;2375;2376;2594;2595;6031;6032	2086;2087;2088;3045;3046;3047;3319;3320;8213;8214	2086;3046;3320;8214
Q9Y3T9	Q9Y3T9	Nucleolar complex protein 2 homolog	NOC2L	sp|Q9Y3T9|NOC2L_HUMAN Nucleolar complex protein 2 homolog OS=Homo sapiens GN=NOC2L PE=1 SV=4	84.918	749	0	0	0	0	0	0	0	0	0	0	0	0	0	0	0	0	0	0	14362000				399	1411;1559;2045;2103	True;True;True;True	1470;1623;2127;2189	6471;6472;7024;9443;9667	8739;8740;9415;12820;13077	8739;9415;12820;13077
P35637-2;P35637;Q92804-2;Q92804	P35637-2;P35637;Q92804-2;Q92804	RNA-binding protein FUS;TATA-binding protein-associated factor 2N	FUS;TAF15	sp|P35637-2|FUS_HUMAN Isoform Short of RNA-binding protein FUS OS=Homo sapiens GN=FUS;sp|P35637|FUS_HUMAN RNA-binding protein FUS OS=Homo sapiens GN=FUS PE=1 SV=1;sp|Q92804-2|RBP56_HUMAN Isoform Short of TATA-binding protein-associated factor 2N OS=Homo sa	53.354	525	0	0	0	0	0	0	0	0	0	0	0	0	0	0	0	0	0	0	34097000				180	619	TRUE	638	2342;2343;2344	3009;3010;3011	3010
Q14566	Q14566	DNA replication licensing factor MCM6	MCM6	sp|Q14566|MCM6_HUMAN DNA replication licensing factor MCM6 OS=Homo sapiens GN=MCM6 PE=1 SV=1	92.888	821	0	0	0	0	0	0	0	0	0	0	0	0	0	0	0	0	0	0	86549000				293	183;431;461;776;797;891;1227;1914;1922;2115;2208;2230	True;True;True;True;True;True;True;True;True;True;True;True	188;446;477;797;818;917;1260;1987;1997;2201;2297;2320	626;1553;1659;3374;3420;3874;3875;5716;8902;8903;8904;8905;8951;9690;10156;10157;10232;10233	766;1868;1988;4455;4508;5101;5102;7851;12003;12004;12005;12006;12063;13102;13710;13711;13804;13805	766;1868;1988;4455;4508;5101;7851;12003;12063;13102;13711;13805
Q92973-2;Q92973;Q92973-3;O14787-2	Q92973-2;Q92973;Q92973-3	Transportin-1	TNPO1	sp|Q92973-2|TNPO1_HUMAN Isoform 2 of Transportin-1 OS=Homo sapiens GN=TNPO1;sp|Q92973|TNPO1_HUMAN Transportin-1 OS=Homo sapiens GN=TNPO1 PE=1 SV=2;sp|Q92973-3|TNPO1_HUMAN Isoform 3 of Transportin-1 OS=Homo sapiens GN=TNPO1	101.31	890	0	0	0	0	0	0	0	0	0	0	0	0	0	0	0	0	0	0	54767000				353	195;467;617;1857	True;True;True;True	200;483;636;1927	659;1666;1667;1668;1669;2335;2336;2337;8684;8685;8686	802;1995;1996;1997;1998;3002;3003;3004;11728;11729;11730	802;1997;3003;11728
O60264;P28370-2;P28370	O60264	SWI/SNF-related matrix-associated actin-dependent regulator of chromatin subfamily A member 5	SMARCA5	sp|O60264|SMCA5_HUMAN SWI/SNF-related matrix-associated actin-dependent regulator of chromatin subfamily A member 5 OS=Homo sapiens GN=SMARCA5 PE=1 SV=1	121.9	1052	0	0	0	0	0	0	0	0	0	0	0	0	0	0	0	0	0	0	25055000				57	462;543;1182;1515;1862	True;True;True;True;True	478;562;1215;1578;1932	1660;1661;1974;1975;1976;1977;5258;6846;8698	1989;1990;2383;2384;2385;2386;7026;9189;11746	1990;2386;7026;9189;11746
P01876;P01877	P01876;P01877	Ig alpha-1 chain C region;Ig alpha-2 chain C region	IGHA1;IGHA2	sp|P01876|IGHA1_HUMAN Ig alpha-1 chain C region OS=Homo sapiens GN=IGHA1 PE=1 SV=2;sp|P01877|IGHA2_HUMAN Ig alpha-2 chain C region OS=Homo sapiens GN=IGHA2 PE=1 SV=3	37.654	353	0	0	0	0	0	0	0	0	0	0	0	0	0	0	0	0	0	0	18917000				75	1469;1602;1826	True;True;True	1531;1666;1895	6655;6656;7457;7458;7459;8567	8955;8956;10012;10013;10014;11559	8955;10012;11559
P56192;P56192-2	P56192;P56192-2	Methionine--tRNA ligase, cytoplasmic	MARS	sp|P56192|SYMC_HUMAN Methionine--tRNA ligase, cytoplasmic OS=Homo sapiens GN=MARS PE=1 SV=2;sp|P56192-2|SYMC_HUMAN Isoform 2 of Methionine--tRNA ligase, cytoplasmic OS=Homo sapiens GN=MARS	101.11	900	0	0	0	0	0	0	0	0	0	0	0	0	0	0	0	0	0	0	107070000				220	35;635;677;918;1034;1381;1495;1525	True;True;True;True;True;True;True;True	35;654;696;944;1063;1438;1557;1588	80;81;82;2389;2390;2391;2576;2577;2578;3991;4438;4439;4440;4441;4442;6367;6784;6785;6786;6862	83;84;85;3064;3065;3066;3301;3302;3303;5260;5839;5840;5841;5842;5843;8621;9121;9122;9123;9206	83;3064;3303;5260;5841;8621;9122;9206
Q03701	Q03701	CCAAT/enhancer-binding protein zeta	CEBPZ	sp|Q03701|CEBPZ_HUMAN CCAAT/enhancer-binding protein zeta OS=Homo sapiens GN=CEBPZ PE=1 SV=3	120.97	1054	0	0	0	0	0	0	0	0	0	0	0	0	0	0	0	0	0	0	8801600				266	97;371;743	True;True;True	97;383;764	279;280;281;1319;2847	309;310;311;1570;3652	311;1570;3652
P43246-2;P43246	P43246-2;P43246	DNA mismatch repair protein Msh2	MSH2	sp|P43246-2|MSH2_HUMAN Isoform 2 of DNA mismatch repair protein Msh2 OS=Homo sapiens GN=MSH2;sp|P43246|MSH2_HUMAN DNA mismatch repair protein Msh2 OS=Homo sapiens GN=MSH2 PE=1 SV=1	97.321	868	0	0	0	0	0	0	0	0	0	0	0	0	0	0	0	0	0	0	22316000				192	306;1382;1445;1545;1552	True;True;True;True;True	315;1439;1505;1608;1615	1051;1052;6368;6579;6972;6973;6994;6995;6996	1253;1254;8622;8858;9358;9359;9381;9382;9383	1253;8622;8858;9359;9383
P23368-2;P23368	P23368-2;P23368	NAD-dependent malic enzyme, mitochondrial	ME2	sp|P23368-2|MAOM_HUMAN Isoform 2 of NAD-dependent malic enzyme, mitochondrial OS=Homo sapiens GN=ME2;sp|P23368|MAOM_HUMAN NAD-dependent malic enzyme, mitochondrial OS=Homo sapiens GN=ME2 PE=1 SV=1	53.586	479	0	0	0	0	0	0	0	0	0	0	0	0	0	0	0	0	0	0	0				148	289	TRUE	298	1013;1014	1212;1213	1213		1;2		218;222
Q9Y2X3	Q9Y2X3	Nucleolar protein 58	NOP58	sp|Q9Y2X3|NOP58_HUMAN Nucleolar protein 58 OS=Homo sapiens GN=NOP58 PE=1 SV=1	59.578	529	0	0	0	0	0	0	0	0	0	0	0	0	0	0	0	0	0	0	6574300				398	340;1949	True;True	352;2027	1182;9063	1408;12185	1408;12185
P13807-2;P13807	P13807-2;P13807	Glycogen [starch] synthase, muscle	GYS1	sp|P13807-2|GYS1_HUMAN Isoform 2 of Glycogen [starch] synthase, muscle OS=Homo sapiens GN=GYS1;sp|P13807|GYS1_HUMAN Glycogen [starch] synthase, muscle OS=Homo sapiens GN=GYS1 PE=1 SV=2	76.482	673	0	0	0	0	0	0	0	0	0	0	0	0	0	0	0	0	0	0	6970800				124	1903	TRUE	1975	8861;8862;8863	11954;11955;11956	11955
Q96T37-4;Q96T37-2;Q96T37-3;Q96T37	Q96T37-4;Q96T37-2;Q96T37-3;Q96T37	Putative RNA-binding protein 15	RBM15	sp|Q96T37-4|RBM15_HUMAN Isoform 4 of Putative RNA-binding protein 15 OS=Homo sapiens GN=RBM15;sp|Q96T37-2|RBM15_HUMAN Isoform 2 of Putative RNA-binding protein 15 OS=Homo sapiens GN=RBM15;sp|Q96T37-3|RBM15_HUMAN Isoform 3 of Putative RNA-binding protein 15	99.7	913	0	0	0	0	0	0	0	0	0	0	0	0	0	0	0	0	0	0	14739000				364	483;1755;2004	True;True;True	501;1821;2085	1729;8287;8288;8289;8290;9352	2074;11237;11238;11239;11240;12729	2074;11240;12729
P14314-2;P14314	P14314-2;P14314	Glucosidase 2 subunit beta	PRKCSH	sp|P14314-2|GLU2B_HUMAN Isoform 2 of Glucosidase 2 subunit beta OS=Homo sapiens GN=PRKCSH;sp|P14314|GLU2B_HUMAN Glucosidase 2 subunit beta OS=Homo sapiens GN=PRKCSH PE=1 SV=2	59.177	525	0	0	0	0	0	0	0	0	0	0	0	0	0	0	0	0	0	0	1281500				125	465	TRUE	481	1664	1993	1993
P17812;P17812-2	P17812;P17812-2	CTP synthase 1	CTPS1	sp|P17812|PYRG1_HUMAN CTP synthase 1 OS=Homo sapiens GN=CTPS1 PE=1 SV=2;sp|P17812-2|PYRG1_HUMAN Isoform 2 of CTP synthase 1 OS=Homo sapiens GN=CTPS1	66.69	591	0	0	0	0	0	0	0	0	0	0	0	0	0	0	0	0	0	0	72321000				136	449;570;663;679;887;959;1112;2196	True;True;True;True;True;True;True;True	464;589;682;698;913;986;1141;2285	1611;1612;2108;2109;2549;2580;2581;2582;3848;3849;4095;5023;10089;10090	1934;1935;2636;2637;3274;3305;3306;3307;5031;5032;5389;6755;13635;13636	1935;2636;3274;3305;5031;5389;6755;13635
P53618	P53618	Coatomer subunit beta	COPB1	sp|P53618|COPB_HUMAN Coatomer subunit beta OS=Homo sapiens GN=COPB1 PE=1 SV=3	107.14	953	0	0	0	0	0	0	0	0	0	0	0	0	0	0	0	0	0	0	8290500				213	1246;1312;2232	True;True;True	1279;1280;1362;2322	5776;5777;6010;10237	7917;7918;8186;13809	7917;8186;13809	75		518
P02788-2;P02788	P02788-2;P02788	Lactotransferrin;Lactoferricin-H;Kaliocin-1;Lactoferroxin-A;Lactoferroxin-B;Lactoferroxin-C	LTF	sp|P02788-2|TRFL_HUMAN Isoform DeltaLf of Lactotransferrin OS=Homo sapiens GN=LTF;sp|P02788|TRFL_HUMAN Lactotransferrin OS=Homo sapiens GN=LTF PE=1 SV=6	73.16	666	0	0	0	0	0	0	0	0	0	0	0	0	0	0	0	0	0	0	2651300				78	1184;1358	True;True	1217;1412	5265;6262	7033;8501	7033;8501
Q4VCS5;Q4VCS5-2	Q4VCS5;Q4VCS5-2	Angiomotin	AMOT	sp|Q4VCS5|AMOT_HUMAN Angiomotin OS=Homo sapiens GN=AMOT PE=1 SV=1;sp|Q4VCS5-2|AMOT_HUMAN Isoform 2 of Angiomotin OS=Homo sapiens GN=AMOT	118.08	1084	0	0	0	0	0	0	0	0	0	0	0	0	0	0	0	0	0	0	11567000				316	164;166;292;314;1129	True;True;True;True;True	168;170;301;323;1159	534;540;1018;1067;1068;5074	642;648;1217;1270;1271;6806	642;648;1217;1270;6806
Q96EY7	Q96EY7	Pentatricopeptide repeat domain-containing protein 3, mitochondrial	PTCD3	sp|Q96EY7|PTCD3_HUMAN Pentatricopeptide repeat domain-containing protein 3, mitochondrial OS=Homo sapiens GN=PTCD3 PE=1 SV=3	78.549	689	0	0	0	0	0	0	0	0	0	0	0	0	0	0	0	0	0	0	0				357	1968	TRUE	2047	9248	12615	12615
Q92499-3;Q92499-2;Q92499	Q92499-3;Q92499-2;Q92499	ATP-dependent RNA helicase DDX1	DDX1	sp|Q92499-3|DDX1_HUMAN Isoform 3 of ATP-dependent RNA helicase DDX1 OS=Homo sapiens GN=DDX1;sp|Q92499-2|DDX1_HUMAN Isoform 2 of ATP-dependent RNA helicase DDX1 OS=Homo sapiens GN=DDX1;sp|Q92499|DDX1_HUMAN ATP-dependent RNA helicase DDX1 OS=Homo sapiens GN=	68.712	612	0	0	0	0	0	0	0	0	0	0	0	0	0	0	0	0	0	0	4637200				348	426	TRUE	441	1543;1544	1857;1858	1858
P51659	P51659	Peroxisomal multifunctional enzyme type 2;(3R)-hydroxyacyl-CoA dehydrogenase;Enoyl-CoA hydratase 2	HSD17B4	sp|P51659|DHB4_HUMAN Peroxisomal multifunctional enzyme type 2 OS=Homo sapiens GN=HSD17B4 PE=1 SV=3	79.685	736	0	0	0	0	0	0	0	0	0	0	0	0	0	0	0	0	0	0	1878900				208	2140	TRUE	2228	9811	13235	13235
Q5QJE6	Q5QJE6	Deoxynucleotidyltransferase terminal-interacting protein 2	DNTTIP2	sp|Q5QJE6|TDIF2_HUMAN Deoxynucleotidyltransferase terminal-interacting protein 2 OS=Homo sapiens GN=DNTTIP2 PE=1 SV=2	84.468	756	0	0	0	0	0	0	0	0	0	0	0	0	0	0	0	0	0	0	14716000				322	177;1220;1255;1494	True;True;True;True	181;1253;1289;1556	593;5695;5696;5697;5802;6783	728;7830;7831;7832;7947;9120	728;7831;7947;9120
Q08188	Q08188	Protein-glutamine gamma-glutamyltransferase E;Protein-glutamine gamma-glutamyltransferase E 50 kDa catalytic chain;Protein-glutamine gamma-glutamyltransferase E 27 kDa non-catalytic chain	TGM3	sp|Q08188|TGM3_HUMAN Protein-glutamine gamma-glutamyltransferase E OS=Homo sapiens GN=TGM3 PE=1 SV=4	76.631	693	1	0	0	1.9	0	0	1793100	0	0	2	0	0	3.2	0	0	1991900	0	0	84641000				271	231;302;922;1410;1730;2042;2093	True;True;True;True;True;True;True	237;311;948;1469;1796;2124;2179	754;755;756;757;1045;3996;6469;6470;8156;9433;9434;9435;9436;9437;9438;9599;9600;9601;9602;9603;9604	919;920;921;922;1247;5266;8737;8738;10998;12810;12811;12812;12813;12814;12815;12995;12996;12997;12998;12999;13000	919;1247;5266;8737;10998;12815;12998
O15381;O15381-2;O15381-5;O15381-3;O15381-4	O15381;O15381-2;O15381-5;O15381-3;O15381-4	Nuclear valosin-containing protein-like	NVL	sp|O15381|NVL_HUMAN Nuclear valosin-containing protein-like OS=Homo sapiens GN=NVL PE=1 SV=1;sp|O15381-2|NVL_HUMAN Isoform 2 of Nuclear valosin-containing protein-like OS=Homo sapiens GN=NVL;sp|O15381-5|NVL_HUMAN Isoform 5 of Nuclear valosin-containing pro	95.05	856	0	0	0	0	0	0	0	0	0	0	0	0	0	0	0	0	0	0	34207000				52	389;521;860;948;1064;2076;2077;2141;2233	True;True;True;True;True;True;True;True;True	402;539;886;975;1093;2158;2159;2229;2323	1387;1876;3783;4064;4782;4783;9541;9542;9812;10238;10239;10240	1669;2281;4965;5341;6324;6325;12934;12935;13236;13810;13811;13812	1669;2281;4965;5341;6325;12934;12935;13236;13810
Q08J23-2;Q08J23;Q08J23-3	Q08J23-2;Q08J23;Q08J23-3	tRNA (cytosine(34)-C(5))-methyltransferase	NSUN2	sp|Q08J23-2|NSUN2_HUMAN Isoform 2 of tRNA (cytosine(34)-C(5))-methyltransferase OS=Homo sapiens GN=NSUN2;sp|Q08J23|NSUN2_HUMAN tRNA (cytosine(34)-C(5))-methyltransferase OS=Homo sapiens GN=NSUN2 PE=1 SV=2;sp|Q08J23-3|NSUN2_HUMAN Isoform 3 of tRNA (cytosine	82.392	732	0	0	0	0	0	0	0	0	0	0	0	0	0	0	0	0	0	0	19077000				276	539;855	True;True	558;880	1969;3756;3757;3758	2378;4934;4935;4936	2378;4936
Q9NR30-2;Q9NR30	Q9NR30-2;Q9NR30	Nucleolar RNA helicase 2	DDX21	sp|Q9NR30-2|DDX21_HUMAN Isoform 2 of Nucleolar RNA helicase 2 OS=Homo sapiens GN=DDX21;sp|Q9NR30|DDX21_HUMAN Nucleolar RNA helicase 2 OS=Homo sapiens GN=DDX21 PE=1 SV=5	79.656	715	0	0	0	0	0	0	0	0	0	0	0	0	0	0	0	0	0	0	17416000				384	149;740;1098;1324	True;True;True;True	152;761;1127;1374	432;433;2831;4974;6063	498;499;3632;6698;8266	499;3632;6698;8266
Q14974	Q14974	Importin subunit beta-1	KPNB1	sp|Q14974|IMB1_HUMAN Importin subunit beta-1 OS=Homo sapiens GN=KPNB1 PE=1 SV=2	97.169	876	0	0	0	0	0	0	0	0	0	0	0	0	0	0	0	0	0	0	37889000				301	1406;2046	True;True	1465;2128	6464;9444;9445;9446;9447;9448;9449	8732;12821;12822;12823;12824;12825;12826	8732;12826
O94906-2;O94906	O94906-2;O94906	Pre-mRNA-processing factor 6	PRPF6	sp|O94906-2|PRP6_HUMAN Isoform 2 of Pre-mRNA-processing factor 6 OS=Homo sapiens GN=PRPF6;sp|O94906|PRP6_HUMAN Pre-mRNA-processing factor 6 OS=Homo sapiens GN=PRPF6 PE=1 SV=1	102.43	901	0	0	0	0	0	0	0	0	0	0	0	0	0	0	0	0	0	0	30252000				67	25;111;202;527;1040;1042;1199	True;True;True;True;True;True;True	25;112;207;545;1069;1071;1232	54;55;56;57;58;343;677;1887;4467;4472;5334	57;58;59;60;61;409;820;2292;5883;5888;7148	57;409;820;2292;5883;5888;7148
P38646	P38646	Stress-70 protein, mitochondrial	HSPA9	sp|P38646|GRP75_HUMAN Stress-70 protein, mitochondrial OS=Homo sapiens GN=HSPA9 PE=1 SV=2	73.68	679	0	0	0	0	0	0	0	0	0	0	0	0	0	0	0	0	0	0	7274600				185	1447;1924;2060	True;True;True	1507;1999;2142	6581;8957;9507;9508;9509	8860;12069;12900;12901;12902	8860;12069;12901
P06737-2;P06737;P11217-2;P11217	P06737-2;P06737	Glycogen phosphorylase, liver form	PYGL	sp|P06737-2|PYGL_HUMAN Isoform 2 of Glycogen phosphorylase, liver form OS=Homo sapiens GN=PYGL;sp|P06737|PYGL_HUMAN Glycogen phosphorylase, liver form OS=Homo sapiens GN=PYGL PE=1 SV=4	93.133	813	0	0	0	0	0	0	0	0	0	0	0	0	0	0	0	0	0	0	120830000				93	100;101;148;334;577;672;789;877;1231;1293;1353;1820;2025;2036;2083;2180	True;True;True;True;True;True;True;True;True;True;True;True;True;True;True;True	101;102;151;346;596;691;810;903;1264;1337;1407;1889;2106;2117;2166;2268	287;288;289;290;431;1164;2164;2564;3393;3394;3828;5722;5937;6235;6236;8555;9402;9423;9559;9560;9561;9562;10014	318;319;320;321;497;1389;2767;3289;4474;4475;5011;7857;8108;8474;8475;11546;12779;12800;12955;12956;12957;12958;13536	318;321;497;1389;2767;3289;4474;5011;7857;8108;8475;11546;12779;12800;12955;13536
Q9Y4W2-3;Q9Y4W2-2;Q9Y4W2;Q9Y4W2-4	Q9Y4W2-3;Q9Y4W2-2;Q9Y4W2	Ribosomal biogenesis protein LAS1L	LAS1L	sp|Q9Y4W2-3|LAS1L_HUMAN Isoform 3 of Ribosomal biogenesis protein LAS1L OS=Homo sapiens GN=LAS1L;sp|Q9Y4W2-2|LAS1L_HUMAN Isoform 2 of Ribosomal biogenesis protein LAS1L OS=Homo sapiens GN=LAS1L;sp|Q9Y4W2|LAS1L_HUMAN Ribosomal biogenesis protein LAS1L OS=Ho	76.844	675	0	0	0	0	0	0	0	0	0	0	0	0	0	0	0	0	0	0	19224000				402	140;591;606;681	True;True;True;True	143;610;625;700	407;2257;2258;2306;2307;2308;2586;2587	473;2922;2923;2973;2974;2975;3311;3312	473;2923;2974;3312
O95373	O95373	Importin-7	IPO7	sp|O95373|IPO7_HUMAN Importin-7 OS=Homo sapiens GN=IPO7 PE=1 SV=1	119.52	1038	0	0	0	0	0	0	0	0	0	0	0	0	0	0	0	0	0	0	8708500				69	59;86	True;True	59;86	175;176;249	202;203;279	202;279
Q9Y4L1;Q9Y4L1-2	Q9Y4L1;Q9Y4L1-2	Hypoxia up-regulated protein 1	HYOU1	sp|Q9Y4L1|HYOU1_HUMAN Hypoxia up-regulated protein 1 OS=Homo sapiens GN=HYOU1 PE=1 SV=1;sp|Q9Y4L1-2|HYOU1_HUMAN Isoform 2 of Hypoxia up-regulated protein 1 OS=Homo sapiens GN=HYOU1	111.33	999	0	0	0	0	0	0	0	0	0	0	0	0	0	0	0	0	0	0	4544400				401	48;486	True;True	48;504	138;1737;1738	161;2082;2083	161;2083
P07384	P07384	Calpain-1 catalytic subunit	CAPN1	sp|P07384|CAN1_HUMAN Calpain-1 catalytic subunit OS=Homo sapiens GN=CAPN1 PE=1 SV=1	81.889	714	0	0	0	0	0	0	0	0	0	0	0	0	0	0	0	0	0	0	6413600				99	1431;1631	True;True	1491;1697	6543;7620;7621;7622	8820;10256;10257;10258	8820;10258
Q99575	Q99575	Ribonucleases P/MRP protein subunit POP1	POP1	sp|Q99575|POP1_HUMAN Ribonucleases P/MRP protein subunit POP1 OS=Homo sapiens GN=POP1 PE=1 SV=2	114.71	1024	0	0	0	0	0	0	0	0	0	0	0	0	0	0	0	0	0	0	1941700				366	884	TRUE	910	3842	5025	5025
P25205;P25205-2	P25205;P25205-2	DNA replication licensing factor MCM3	MCM3	sp|P25205|MCM3_HUMAN DNA replication licensing factor MCM3 OS=Homo sapiens GN=MCM3 PE=1 SV=3;sp|P25205-2|MCM3_HUMAN Isoform 2 of DNA replication licensing factor MCM3 OS=Homo sapiens GN=MCM3	90.98	808	0	0	0	0	0	0	0	0	0	0	0	0	0	0	0	0	0	0	67476000				152	76;829;1079;1892;1935;2111;2234	True;True;True;True;True;True;True	76;850;1108;1964;2010;2197;2324	225;226;3516;4808;4809;8833;8982;9684;9685;9686;10241;10242	255;256;4611;6350;6351;11925;12094;13096;13097;13098;13813;13814	255;4611;6350;11925;12094;13097;13814
P53621;P53621-2	P53621;P53621-2	Coatomer subunit alpha;Xenin;Proxenin	COPA	sp|P53621|COPA_HUMAN Coatomer subunit alpha OS=Homo sapiens GN=COPA PE=1 SV=2;sp|P53621-2|COPA_HUMAN Isoform 2 of Coatomer subunit alpha OS=Homo sapiens GN=COPA	138.34	1224	0	0	0	0	0	0	0	0	0	0	0	0	0	0	0	0	0	0	19946000				214	1108;1228;1367;2158	True;True;True;True	1137;1261;1421;2246	5013;5717;5718;6278;6279;9877	6745;7852;7853;8517;8518;13316	6745;7853;8517;13316
Q9P2J5;Q9P2J5-3;Q9P2J5-2	Q9P2J5;Q9P2J5-3;Q9P2J5-2	Leucine--tRNA ligase, cytoplasmic	LARS	sp|Q9P2J5|SYLC_HUMAN Leucine--tRNA ligase, cytoplasmic OS=Homo sapiens GN=LARS PE=1 SV=2;sp|Q9P2J5-3|SYLC_HUMAN Isoform 3 of Leucine--tRNA ligase, cytoplasmic OS=Homo sapiens GN=LARS;sp|Q9P2J5-2|SYLC_HUMAN Isoform 2 of Leucine--tRNA ligase, cytoplasmic OS=	134.46	1176	0	0	0	0	0	0	0	0	0	0	0	0	0	0	0	0	0	0	20052000				389	1993;1996;2022	True;True;True	2074;2077;2103	9328;9329;9332;9333;9397	12704;12705;12708;12709;12774	12704;12709;12774
Q15393	Q15393	Splicing factor 3B subunit 3	SF3B3	sp|Q15393|SF3B3_HUMAN Splicing factor 3B subunit 3 OS=Homo sapiens GN=SF3B3 PE=1 SV=4	135.58	1217	0	0	0	0	0	0	0	0	0	0	0	0	0	0	0	0	0	0	16935000				308	546;1933	True;True	565;2008	2021;2022;8976;8977;8978	2522;2523;12088;12089;12090	2523;12089
Q7L2E3-3;Q7L2E3;Q7L2E3-2	Q7L2E3-3;Q7L2E3;Q7L2E3-2	Putative ATP-dependent RNA helicase DHX30	DHX30	sp|Q7L2E3-3|DHX30_HUMAN Isoform 3 of Putative ATP-dependent RNA helicase DHX30 OS=Homo sapiens GN=DHX30;sp|Q7L2E3|DHX30_HUMAN Putative ATP-dependent RNA helicase DHX30 OS=Homo sapiens GN=DHX30 PE=1 SV=1;sp|Q7L2E3-2|DHX30_HUMAN Isoform 2 of Putative ATP-dep	129.44	1155	0	0	0	0	0	0	0	0	0	0	0	0	0	0	0	0	0	0	2356300				330	1891;2039	True;True	1963;2120	8832;9427	11924;12804	11924;12804
P42704	P42704	Leucine-rich PPR motif-containing protein, mitochondrial	LRPPRC	sp|P42704|LPPRC_HUMAN Leucine-rich PPR motif-containing protein, mitochondrial OS=Homo sapiens GN=LRPPRC PE=1 SV=3	157.9	1394	0	0	0	0	0	0	0	0	0	0	0	0	0	0	0	0	0	0	10528000				189	890;1264;1934	True;True;True	916;1300;2009	3873;5823;8979;8980;8981	5100;7968;12091;12092;12093	5100;7968;12093
P33991	P33991	DNA replication licensing factor MCM4	MCM4	sp|P33991|MCM4_HUMAN DNA replication licensing factor MCM4 OS=Homo sapiens GN=MCM4 PE=1 SV=5	96.557	863	0	0	0	0	0	0	0	0	0	0	0	0	0	0	0	0	0	0	17062000				172	994;1167;1195;1918	True;True;True;True	1021;1200;1228;1992	4317;5217;5319;8934	5700;6981;7133;12046	5700;6981;7133;12046
Q9ULX6-2;Q9ULX6	Q9ULX6-2;Q9ULX6	A-kinase anchor protein 8-like	AKAP8L	sp|Q9ULX6-2|AKP8L_HUMAN Isoform 2 of A-kinase anchor protein 8-like OS=Homo sapiens GN=AKAP8L;sp|Q9ULX6|AKP8L_HUMAN A-kinase anchor protein 8-like OS=Homo sapiens GN=AKAP8L PE=1 SV=3	65.229	585	0	0	0	0	0	0	0	0	0	0	0	0	0	0	0	0	0	0	13119000				395	293;1652;1827	True;True;True	302;1718;1896	1019;7715;8568	1218;10373;11560	1218;10373;11560
Q7Z2T5	Q7Z2T5	TRMT1-like protein	TRMT1L	sp|Q7Z2T5|TRM1L_HUMAN TRMT1-like protein OS=Homo sapiens GN=TRMT1L PE=1 SV=2	81.746	733	0	0	0	0	0	0	0	0	0	0	0	0	0	0	0	0	0	0	8972400				333	300;2226	True;True	309;2316	1039;10223	1241;13795	1241;13795
Q9Y678	Q9Y678	Coatomer subunit gamma-1	COPG1	sp|Q9Y678|COPG1_HUMAN Coatomer subunit gamma-1 OS=Homo sapiens GN=COPG1 PE=1 SV=1	97.717	874	0	0	0	0	0	0	0	0	0	0	0	0	0	0	0	0	0	0	32371000				405	130;853;1048;1463;1850;1999	True;True;True;True;True;True	133;878;1077;1524;1920;2080	388;3754;4484;4485;6644;8653;9338	454;4932;5900;5901;8943;11648;12715	454;4932;5901;8943;11648;12715
P16615-5;P16615-2;P16615-3;P16615-4;P16615;O14983-2;O14983;O14983-3;Q93084-4;Q93084-2;Q93084-3;Q93084-7;Q93084;Q93084-6;Q93084-5	P16615-5;P16615-2;P16615-3;P16615-4;P16615;O14983-2;O14983	Sarcoplasmic/endoplasmic reticulum calcium ATPase 2;Sarcoplasmic/endoplasmic reticulum calcium ATPase 1	ATP2A2;ATP2A1	sp|P16615-5|AT2A2_HUMAN Isoform 5 of Sarcoplasmic/endoplasmic reticulum calcium ATPase 2 OS=Homo sapiens GN=ATP2A2;sp|P16615-2|AT2A2_HUMAN Isoform 2 of Sarcoplasmic/endoplasmic reticulum calcium ATPase 2 OS=Homo sapiens GN=ATP2A2;sp|P16615-3|AT2A2_HUMAN Is	109.73	997	0	0	0	0	0	0	0	0	0	0	0	0	0	0	0	0	0	0	17643000				133	373;1308;1371;2009	True;True;True;True	385;1358;1425;2090	1321;6003;6289;9368	1572;8179;8528;12745	1572;8179;8528;12745
O14980	O14980	Exportin-1	XPO1	sp|O14980|XPO1_HUMAN Exportin-1 OS=Homo sapiens GN=XPO1 PE=1 SV=1	123.38	1071	0	0	0	0	0	0	0	0	0	0	0	0	0	0	0	0	0	0	52120000				47	473;933;1259;1421	True;True;True;True	489;959;1294;1295;1480	1687;1688;4019;5814;5815;5816;5817;5818;6494;6495	2022;2023;5290;7959;7960;7961;7962;7963;8762;8763	2022;5290;7960;8762	34		424
Q9H307-2;Q9H307	Q9H307-2;Q9H307	Pinin	PNN	sp|Q9H307-2|PININ_HUMAN Isoform 2 of Pinin OS=Homo sapiens GN=PNN;sp|Q9H307|PININ_HUMAN Pinin OS=Homo sapiens GN=PNN PE=1 SV=4	67.005	584	0	0	0	0	0	0	0	0	0	0	0	0	0	0	0	0	0	0	5854400				379	808;1213	True;True	829;1246	3441;5676	4535;7810	4535;7810
Q15459;Q15459-2	Q15459;Q15459-2	Splicing factor 3A subunit 1	SF3A1	sp|Q15459|SF3A1_HUMAN Splicing factor 3A subunit 1 OS=Homo sapiens GN=SF3A1 PE=1 SV=1;sp|Q15459-2|SF3A1_HUMAN Isoform 2 of Splicing factor 3A subunit 1 OS=Homo sapiens GN=SF3A1	88.885	793	0	0	0	0	0	0	0	0	0	0	0	0	0	0	0	0	0	0	17325000				309	814;1208;1901	True;True;True	835;1241;1973	3461;3462;3463;5666;8858	4556;4557;4558;7799;11951	4557;7799;11951
Q9BQ39	Q9BQ39	ATP-dependent RNA helicase DDX50	DDX50	sp|Q9BQ39|DDX50_HUMAN ATP-dependent RNA helicase DDX50 OS=Homo sapiens GN=DDX50 PE=1 SV=1	82.564	737	0	0	0	0	0	0	0	0	0	0	0	0	0	0	0	0	0	0	7708300				370	407;1511;2075	True;True;True	421;1574;2157	1469;6829;9540	1779;9172;12933	1779;9172;12933
Q9Y2L1;Q9Y2L1-2	Q9Y2L1;Q9Y2L1-2	Exosome complex exonuclease RRP44	DIS3	sp|Q9Y2L1|RRP44_HUMAN Exosome complex exonuclease RRP44 OS=Homo sapiens GN=DIS3 PE=1 SV=2;sp|Q9Y2L1-2|RRP44_HUMAN Isoform 2 of Exosome complex exonuclease RRP44 OS=Homo sapiens GN=DIS3	109	958	0	0	0	0	0	0	0	0	0	0	0	0	0	0	0	0	0	0	28617000				397	479;608;1696	True;True;True	497;627;1762	1713;2311;2312;2313;8047;8048	2053;2978;2979;2980;10883;10884	2053;2978;10883
P02786	P02786	Transferrin receptor protein 1;Transferrin receptor protein 1, serum form	TFRC	sp|P02786|TFR1_HUMAN Transferrin receptor protein 1 OS=Homo sapiens GN=TFRC PE=1 SV=2	84.87	760	0	0	0	0	0	0	0	0	0	0	0	0	0	0	0	0	0	0	17221000				77	993;1004;1122	True;True;True	1020;1031;1151	4316;4350;5043;5044;5045	5699;5742;6775;6776;6777	5699;5742;6775
Q9H0A0-2;Q9H0A0	Q9H0A0-2;Q9H0A0	N-acetyltransferase 10	NAT10	sp|Q9H0A0-2|NAT10_HUMAN Isoform 2 of RNA cytidine acetyltransferase OS=Homo sapiens GN=NAT10;sp|Q9H0A0|NAT10_HUMAN RNA cytidine acetyltransferase OS=Homo sapiens GN=NAT10 PE=1 SV=2	107.3	953	0	0	0	0	0	0	0	0	0	0	0	0	0	0	0	0	0	0	9029900				377	786;1046;1528	True;True;True	807;1075;1591	3387;4481;4482;6867	4468;5897;5898;9211	4468;5898;9211
A0FGR8-2;A0FGR8;A0FGR8-6;A0FGR8-5;A0FGR8-4	A0FGR8-2;A0FGR8;A0FGR8-6;A0FGR8-5;A0FGR8-4	Extended synaptotagmin-2	ESYT2	sp|A0FGR8-2|ESYT2_HUMAN Isoform 2 of Extended synaptotagmin-2 OS=Homo sapiens GN=ESYT2;sp|A0FGR8|ESYT2_HUMAN Extended synaptotagmin-2 OS=Homo sapiens GN=ESYT2 PE=1 SV=1;sp|A0FGR8-6|ESYT2_HUMAN Isoform 6 of Extended synaptotagmin-2 OS=Homo sapiens GN=ESYT2;	98.9	893	0	0	0	0	0	0	0	0	0	0	0	0	0	0	0	0	0	0	4209000				2	1982;2074	True;True	2063;2156	9296;9539	12665;12932	12665;12932
Q9NZT2-2;Q9NZT2	Q9NZT2-2;Q9NZT2	Opioid growth factor receptor	OGFR	sp|Q9NZT2-2|OGFR_HUMAN Isoform 2 of Opioid growth factor receptor OS=Homo sapiens GN=OGFR;sp|Q9NZT2|OGFR_HUMAN Opioid growth factor receptor OS=Homo sapiens GN=OGFR PE=1 SV=3	71.423	657	0	0	0	0	0	0	0	0	0	0	0	0	0	0	0	0	0	0	2928300				388	1683;1775	True;True	1749;1843	7941;8373	10679;11337	10679;11337
Q8TDD1;Q8TDD1-2	Q8TDD1;Q8TDD1-2	ATP-dependent RNA helicase DDX54	DDX54	sp|Q8TDD1|DDX54_HUMAN ATP-dependent RNA helicase DDX54 OS=Homo sapiens GN=DDX54 PE=1 SV=2;sp|Q8TDD1-2|DDX54_HUMAN Isoform 2 of ATP-dependent RNA helicase DDX54 OS=Homo sapiens GN=DDX54	98.594	881	0	0	0	0	0	0	0	0	0	0	0	0	0	0	0	0	0	0	13331000				343	522;1470;1956	True;True;True	540;1532;2035	1877;6657;6658;9075	2282;8957;8958;12197	2282;8957;12197
Q96JP5-2;Q96JP5	Q96JP5-2;Q96JP5	E3 ubiquitin-protein ligase ZFP91	ZFP91	sp|Q96JP5-2|ZFP91_HUMAN Isoform 2 of E3 ubiquitin-protein ligase ZFP91 OS=Homo sapiens GN=ZFP91;sp|Q96JP5|ZFP91_HUMAN E3 ubiquitin-protein ligase ZFP91 OS=Homo sapiens GN=ZFP91 PE=1 SV=1	59.57	529	0	0	0	0	0	0	0	0	0	0	0	0	0	0	0	0	0	0	603000				361	0	TRUE	0	0	0	0
Q6P3W7	Q6P3W7	SCY1-like protein 2	SCYL2	sp|Q6P3W7|SCYL2_HUMAN SCY1-like protein 2 OS=Homo sapiens GN=SCYL2 PE=1 SV=1	103.71	929	0	0	0	0	0	0	0	0	0	0	0	0	0	0	0	0	0	0	157550000				328	739;1119;1138;1304;1677;1737;2119;2130;2184	True;True;True;True;True;True;True;True;True	760;1148;1170;1354;1743;1803;2205;2206;2218;2272	2830;5035;5036;5116;5117;5118;5119;5994;7914;8171;9705;9706;9707;9708;9786;9787;10024	3631;6767;6768;6867;6868;6869;6870;8170;10651;10652;11014;13119;13120;13121;13122;13209;13210;13547	3631;6767;6867;8170;10652;11014;13122;13209;13547	98		24
P53396-3;P53396-2;P53396	P53396-3;P53396-2;P53396	ATP-citrate synthase	ACLY	sp|P53396-3|ACLY_HUMAN Isoform 3 of ATP-citrate synthase OS=Homo sapiens GN=ACLY;sp|P53396-2|ACLY_HUMAN Isoform 2 of ATP-citrate synthase OS=Homo sapiens GN=ACLY;sp|P53396|ACLY_HUMAN ATP-citrate synthase OS=Homo sapiens GN=ACLY PE=1 SV=3	91.098	830	0	0	0	0	0	0	0	0	0	0	0	0	0	0	0	0	0	0	30095000				212	540;1253;1834	True;True;True	559;1287;1903	1970;1971;5797;5798;5799;5800;8592;8593;8594	2379;2380;7942;7943;7944;7945;11584;11585;11586	2379;7943;11585
O14654	O14654	Insulin receptor substrate 4	IRS4	sp|O14654|IRS4_HUMAN Insulin receptor substrate 4 OS=Homo sapiens GN=IRS4 PE=1 SV=1	133.77	1257	0	0	0	0	0	0	0	0	0	0	0	0	0	0	0	0	0	0	12025000				46	27;610;1128	True;True;True	27;629;1158	61;2315;5073	64;2982;6805	64;2982;6805
P42224-2;P42224	P42224-2;P42224	Signal transducer and activator of transcription 1-alpha/beta	STAT1	sp|P42224-2|STAT1_HUMAN Isoform Beta of Signal transducer and activator of transcription 1-alpha/beta OS=Homo sapiens GN=STAT1;sp|P42224|STAT1_HUMAN Signal transducer and activator of transcription 1-alpha/beta OS=Homo sapiens GN=STAT1 PE=1 SV=2	83.042	712	0	0	0	0	0	0	0	0	0	0	0	0	0	0	0	0	0	0	2497500				188	433	TRUE	448	1555;1556	1870;1871	1870
Q9UBF2-2;Q9UBF2	Q9UBF2-2;Q9UBF2	Coatomer subunit gamma-2	COPG2	sp|Q9UBF2-2|COPG2_HUMAN Isoform 2 of Coatomer subunit gamma-2 OS=Homo sapiens GN=COPG2;sp|Q9UBF2|COPG2_HUMAN Coatomer subunit gamma-2 OS=Homo sapiens GN=COPG2 PE=1 SV=1	81.482	726	0	0	0	0	0	0	0	0	0	0	0	0	0	0	0	0	0	0	2744600				390	909	TRUE	935	3978	5246	5246
Q14444-2;Q14444	Q14444-2;Q14444	Caprin-1	CAPRIN1	sp|Q14444-2|CAPR1_HUMAN Isoform 2 of Caprin-1 OS=Homo sapiens GN=CAPRIN1;sp|Q14444|CAPR1_HUMAN Caprin-1 OS=Homo sapiens GN=CAPRIN1 PE=1 SV=2	76.861	694	0	0	0	0	0	0	0	0	0	0	0	0	0	0	0	0	0	0	20894000				292	1151;1746;2218	True;True;True	1183;1812;2308	5177;5178;8243;10201;10202	6939;6940;11142;13773;13774	6939;11142;13773
Q96RP9;Q96RP9-2	Q96RP9;Q96RP9-2	Elongation factor G, mitochondrial	GFM1	sp|Q96RP9|EFGM_HUMAN Elongation factor G, mitochondrial OS=Homo sapiens GN=GFM1 PE=1 SV=2;sp|Q96RP9-2|EFGM_HUMAN Isoform 2 of Elongation factor G, mitochondrial OS=Homo sapiens GN=GFM1	83.471	751	0	0	0	0	0	0	0	0	0	0	0	0	0	0	0	0	0	0	6051400				363	1641	TRUE	1707	7659;7660	10295;10296	10295
O75152	O75152	Zinc finger CCCH domain-containing protein 11A	ZC3H11A	sp|O75152|ZC11A_HUMAN Zinc finger CCCH domain-containing protein 11A OS=Homo sapiens GN=ZC3H11A PE=1 SV=3	89.13	810	0	0	0	0	0	0	0	0	0	0	0	0	0	0	0	0	0	0	8918400				60	1204;1361;1779;2108	True;True;True;True	1237;1415;1847;2194	5658;6269;8383;9676	7791;8508;11347;13087	7791;8508;11347;13087
P15170-2;P15170-3;P15170;Q8IYD1	P15170-2;P15170-3;P15170;Q8IYD1	Eukaryotic peptide chain release factor GTP-binding subunit ERF3A;Eukaryotic peptide chain release factor GTP-binding subunit ERF3B	GSPT1;GSPT2	sp|P15170-2|ERF3A_HUMAN Isoform 2 of Eukaryotic peptide chain release factor GTP-binding subunit ERF3A OS=Homo sapiens GN=GSPT1;sp|P15170-3|ERF3A_HUMAN Isoform 3 of Eukaryotic peptide chain release factor GTP-binding subunit ERF3A OS=Homo sapiens GN=GSPT1;	68.6	636	0	0	0	0	0	0	0	0	0	0	0	0	0	0	0	0	0	0	7304700				129	453;590	True;True	468;609	1620;2256	1943;2921	1943;2921
Q9Y4W6	Q9Y4W6	AFG3-like protein 2	AFG3L2	sp|Q9Y4W6|AFG32_HUMAN AFG3-like protein 2 OS=Homo sapiens GN=AFG3L2 PE=1 SV=2	88.583	797	0	0	0	0	0	0	0	0	0	0	0	0	0	0	0	0	0	0	4861400				403	2016	TRUE	2097	9384;9385	12761;12762	12761
Q8IX01-4;Q8IX01-3;Q8IX01	Q8IX01-4;Q8IX01-3;Q8IX01	SURP and G-patch domain-containing protein 2	SUGP2	sp|Q8IX01-4|SUGP2_HUMAN Isoform 4 of SURP and G-patch domain-containing protein 2 OS=Homo sapiens GN=SUGP2;sp|Q8IX01-3|SUGP2_HUMAN Isoform 3 of SURP and G-patch domain-containing protein 2 OS=Homo sapiens GN=SUGP2;sp|Q8IX01|SUGP2_HUMAN SURP and G-patch dom	115.18	1030	0	0	0	0	0	0	0	0	0	0	0	0	0	0	0	0	0	0	2853800				335	151	TRUE	154	438;439	504;505	505
O95347-2;O95347	O95347-2;O95347	Structural maintenance of chromosomes protein 2	SMC2	sp|O95347-2|SMC2_HUMAN Isoform 2 of Structural maintenance of chromosomes protein 2 OS=Homo sapiens GN=SMC2;sp|O95347|SMC2_HUMAN Structural maintenance of chromosomes protein 2 OS=Homo sapiens GN=SMC2 PE=1 SV=2	124.92	1099	0	0	0	0	0	0	0	0	0	0	0	0	0	0	0	0	0	0	692470				68	866;1679	True;True	892;1745	3803;7934	4985;10672	4985;10672
P22102;P22102-2	P22102;P22102-2	Trifunctional purine biosynthetic protein adenosine-3;Phosphoribosylamine--glycine ligase;Phosphoribosylformylglycinamidine cyclo-ligase;Phosphoribosylglycinamide formyltransferase	GART	sp|P22102|PUR2_HUMAN Trifunctional purine biosynthetic protein adenosine-3 OS=Homo sapiens GN=GART PE=1 SV=1;sp|P22102-2|PUR2_HUMAN Isoform Short of Trifunctional purine biosynthetic protein adenosine-3 OS=Homo sapiens GN=GART	107.77	1010	0	0	0	0	0	0	0	0	0	0	0	0	0	0	0	0	0	0	30013000				142	8;205;1284;1556;1600	True;True;True;True;True	8;210;1323;1620;1664	20;682;683;5857;7017;7018;7452;7453	22;825;826;8002;9408;9409;10007;10008	22;826;8002;9409;10008
P07814	P07814	Bifunctional glutamate/proline--tRNA ligase;Glutamate--tRNA ligase;Proline--tRNA ligase	EPRS	sp|P07814|SYEP_HUMAN Bifunctional glutamate/proline--tRNA ligase OS=Homo sapiens GN=EPRS PE=1 SV=5	170.59	1512	0	0	0	0	0	0	0	0	0	0	0	0	0	0	0	0	0	0	24096000				101	1221;1401;1605;1969	True;True;True;True	1254;1460;1669;2048	5698;5699;5700;6446;6447;7535;9249;9250	7833;7834;7835;8702;8703;10151;12616;12617	7834;8702;10151;12617
P11388;P11388-2;P11388-3;P11388-4	P11388;P11388-2;P11388-3;P11388-4	DNA topoisomerase 2-alpha	TOP2A	sp|P11388|TOP2A_HUMAN DNA topoisomerase 2-alpha OS=Homo sapiens GN=TOP2A PE=1 SV=3;sp|P11388-2|TOP2A_HUMAN Isoform 2 of DNA topoisomerase 2-alpha OS=Homo sapiens GN=TOP2A;sp|P11388-3|TOP2A_HUMAN Isoform 3 of DNA topoisomerase 2-alpha OS=Homo sapiens GN=TOP	174.38	1531	0	0	0	0	0	0	0	0	0	0	0	0	0	0	0	0	0	0	1614400				117	548	TRUE	567	2026	2527	2527
P01040	P01040	Cystatin-A;Cystatin-A, N-terminally processed	CSTA	sp|P01040|CYTA_HUMAN Cystatin-A OS=Homo sapiens GN=CSTA PE=1 SV=1	11.006	98	0	0	0	0	0	0	0	0	0	0	0	0	0	0	0	0	0	0	46666000				73	1694;1877;1904	True;True;True	1760;1949;1976	8044;8793;8794;8864;8865	10880;11885;11886;11957;11958	10880;11885;11957
P10599-2;P10599	P10599-2;P10599	Thioredoxin	TXN	sp|P10599-2|THIO_HUMAN Isoform 2 of Thioredoxin OS=Homo sapiens GN=TXN;sp|P10599|THIO_HUMAN Thioredoxin OS=Homo sapiens GN=TXN PE=1 SV=3	9.4519	85	2	0	0	25.9	0	0	6260300	0	0	0	0	0	0	0	0	0	0	0	18914000				112	400;1794;2010	True;True;True	414;1862;2091	1434;8443;8444;9369	1739;11424;11425;12746	1739;11424;12746
P31151;Q86SG5	P31151;Q86SG5	Protein S100-A7;Protein S100-A7A	S100A7;S100A7A	sp|P31151|S10A7_HUMAN Protein S100-A7 OS=Homo sapiens GN=S100A7 PE=1 SV=4;sp|Q86SG5|S1A7A_HUMAN Protein S100-A7A OS=Homo sapiens GN=S100A7A PE=1 SV=3	11.471	101	0	0	0	0	0	0	0	0	0	0	0	0	0	0	0	0	0	0	9132100				166	450;728	True;True	465;749	1613;2814	1936;3615	1936;3615
P0CG06;P0CG05;P0CG04;P0CF74;B9A064	P0CG06;P0CG05;P0CG04;P0CF74;B9A064	Ig lambda-3 chain C regions;Ig lambda-2 chain C regions;Ig lambda-1 chain C regions;Ig lambda-6 chain C region;Immunoglobulin lambda-like polypeptide 5	IGLC3;IGLC2;IGLC1;IGLC6;IGLL5	sp|P0CG06|LAC3_HUMAN Ig lambda-3 chain C regions OS=Homo sapiens GN=IGLC3 PE=1 SV=1;sp|P0CG05|LAC2_HUMAN Ig lambda-2 chain C regions OS=Homo sapiens GN=IGLC2 PE=1 SV=1;sp|P0CG04|LAC1_HUMAN Ig lambda-1 chain C regions OS=Homo sapiens GN=IGLC1 PE=1 SV=1;sp|P	11.237	106	0	0	0	0	0	0	0	0	0	0	0	0	0	0	0	0	0	0	5858100				3	1785	TRUE	1853	8400	11365	11365
P69905	P69905	Hemoglobin subunit alpha	HBA1	sp|P69905|HBA_HUMAN Hemoglobin subunit alpha OS=Homo sapiens GN=HBA1 PE=1 SV=2	15.257	142	0	0	0	0	0	0	0	0	0	0	0	0	0	0	0	0	0	0	2462000				248	2005	TRUE	2086	9353	12730	12730
P04040	P04040	Catalase	CAT	sp|P04040|CATA_HUMAN Catalase OS=Homo sapiens GN=CAT PE=1 SV=3	59.755	527	0	0	0	0	0	0	0	0	0	0	0	0	0	0	0	0	0	0	24357000				79	43;561;1235	True;True;True	43;580;1268	108;2087;2088;2089;2090;5733	113;2615;2616;2617;2618;7868	113;2616;7868
O75223	O75223	Gamma-glutamylcyclotransferase	GGCT	sp|O75223|GGCT_HUMAN Gamma-glutamylcyclotransferase OS=Homo sapiens GN=GGCT PE=1 SV=1	21.007	188	0	0	0	0	0	0	0	0	0	0	0	0	0	0	0	0	0	0	14938000				61	1713	TRUE	1779	8116;8117;8118	10958;10959;10960	10958
P29508-2;P29508;P48594	P29508-2;P29508	Serpin B3	SERPINB3	sp|P29508-2|SPB3_HUMAN Isoform 2 of Serpin B3 OS=Homo sapiens GN=SERPINB3;sp|P29508|SPB3_HUMAN Serpin B3 OS=Homo sapiens GN=SERPINB3 PE=1 SV=2	38.549	338	0	0	0	0	0	0	0	0	0	0	0	0	0	0	0	0	0	0	8791000				163	600;688;880	True;True;True	619;707;906	2293;2613;3833;3834	2959;3338;5016;5017	2959;3338;5016
Q14574-2;Q14574	Q14574-2;Q14574	Desmocollin-3	DSC3	sp|Q14574-2|DSC3_HUMAN Isoform 3B of Desmocollin-3 OS=Homo sapiens GN=DSC3;sp|Q14574|DSC3_HUMAN Desmocollin-3 OS=Homo sapiens GN=DSC3 PE=1 SV=3	93.453	839	0	0	0	0	0	0	0	0	0	0	0	0	0	0	0	0	0	0	14568000				294	731;906;2224	True;True;True	752;932;2314	2818;3972;10221	3619;5240;13793	3619;5240;13793
P05090	P05090	Apolipoprotein D	APOD	sp|P05090|APOD_HUMAN Apolipoprotein D OS=Homo sapiens GN=APOD PE=1 SV=1	21.275	189	0	0	0	0	0	0	0	0	0	0	0	0	0	0	0	0	0	0	7680400				89	2068	TRUE	2150	9530	12923	12923
Q96QA5	Q96QA5	Gasdermin-A	GSDMA	sp|Q96QA5|GSDMA_HUMAN Gasdermin-A OS=Homo sapiens GN=GSDMA PE=1 SV=4	49.364	445	0	0	0	0	0	0	0	0	0	0	0	0	0	0	0	0	0	0	12888000				362	616;2044	True;True	635;2126	2333;2334;9442	3000;3001;12819	3000;12819
Q13867	Q13867	Bleomycin hydrolase	BLMH	sp|Q13867|BLMH_HUMAN Bleomycin hydrolase OS=Homo sapiens GN=BLMH PE=1 SV=1	52.562	455	0	0	0	0	0	0	0	0	0	0	0	0	0	0	0	0	0	0	9181400				287	1256	TRUE	1290	5803;5804	7948;7949	7949
O75635-2;O75635	O75635-2;O75635	Serpin B7	SERPINB7	sp|O75635-2|SPB7_HUMAN Isoform 2 of Serpin B7 OS=Homo sapiens GN=SERPINB7;sp|O75635|SPB7_HUMAN Serpin B7 OS=Homo sapiens GN=SERPINB7 PE=1 SV=1	41.174	363	0	0	0	0	0	0	0	0	0	0	0	0	0	0	0	0	0	0	1547300				64	40	TRUE	40	95	100	100
P07339	P07339	Cathepsin D;Cathepsin D light chain;Cathepsin D heavy chain	CTSD	sp|P07339|CATD_HUMAN Cathepsin D OS=Homo sapiens GN=CTSD PE=1 SV=1	44.552	412	0	0	0	0	0	0	0	0	0	0	0	0	0	0	0	0	0	0	2801000				97	518	TRUE	536	1870	2275	2275
P08237-2;P08237;P08237-3	P08237-2;P08237;P08237-3	ATP-dependent 6-phosphofructokinase, muscle type	PFKM	sp|P08237-2|PFKAM_HUMAN Isoform 2 of ATP-dependent 6-phosphofructokinase, muscle type OS=Homo sapiens GN=PFKM;sp|P08237|PFKAM_HUMAN ATP-dependent 6-phosphofructokinase, muscle type OS=Homo sapiens GN=PFKM PE=1 SV=2;sp|P08237-3|PFKAM_HUMAN Isoform 3 of ATP-	81.775	749	0	0	0	0	0	0	0	0	0	0	0	0	0	0	0	0	0	0	4215000				105	868	TRUE	894	3807	4990	4990
O00410;O00410-2;O00410-3	O00410;O00410-2;O00410-3	Importin-5	IPO5	sp|O00410|IPO5_HUMAN Importin-5 OS=Homo sapiens GN=IPO5 PE=1 SV=4;sp|O00410-2|IPO5_HUMAN Isoform 2 of Importin-5 OS=Homo sapiens GN=IPO5;sp|O00410-3|IPO5_HUMAN Isoform 3 of Importin-5 OS=Homo sapiens GN=IPO5	123.63	1097	0	0	0	0	0	0	0	0	0	0	0	0	0	0	0	0	0	0	2876400				43	2;1698	True;True	2;1764	12;8059	14;10895	14;10895
Q86VP6-2;Q86VP6	Q86VP6-2;Q86VP6	Cullin-associated NEDD8-dissociated protein 1	CAND1	sp|Q86VP6-2|CAND1_HUMAN Isoform 2 of Cullin-associated NEDD8-dissociated protein 1 OS=Homo sapiens GN=CAND1;sp|Q86VP6|CAND1_HUMAN Cullin-associated NEDD8-dissociated protein 1 OS=Homo sapiens GN=CAND1 PE=1 SV=2	117.89	1062	0	0	0	0	0	0	0	0	0	0	0	0	0	0	0	0	0	0	0				334	133;382	True;True	136;395	391;1367	457;1638	457;1638
P52757-6;P52757-5;P52757-7;P52757-4;P52757-3	P52757-6;P52757-5;P52757-7;P52757-4;P52757-3			sp|P52757-6|CHIO_HUMAN Isoform 6 of Beta-chimaerin OS=Homo sapiens GN=CHN2;sp|P52757-5|CHIO_HUMAN Isoform 5 of Beta-chimaerin OS=Homo sapiens GN=CHN2;sp|P52757-7|CHIO_HUMAN Isoform 7 of Beta-chimaerin OS=Homo sapiens GN=CHN2;sp|P52757-4|CHIO_HUMAN Isoform	27.95	241	0	1	0	0	4.6	0	0	102460000	0	0	0	0	0	0	0	0	0	0	102460000				211	572	TRUE	591	2112	2640	2640
P23490	P23490	Loricrin	LOR	sp|P23490|LORI_HUMAN Loricrin OS=Homo sapiens GN=LOR PE=1 SV=2	25.76	312	0	0	0	0	0	0	0	0	0	0	0	0	0	0	0	0	0	0	38610000				149	968;1522	True;True	995;1585	4131;6857	5427;5428;9200;9201	5428;9201
P47914	P47914	60S ribosomal protein L29	RPL29	sp|P47914|RL29_HUMAN 60S ribosomal protein L29 OS=Homo sapiens GN=RPL29 PE=1 SV=2	17.752	159	0	0	0	0	0	0	0	0	0	0	0	0	0	0	0	0	0	0	30470000				199	159	TRUE	163	520	628	628
P61978-3;P61978;P61978-2	P61978-3;P61978;P61978-2	Heterogeneous nuclear ribonucleoprotein K	HNRNPK	sp|P61978-3|HNRPK_HUMAN Isoform 3 of Heterogeneous nuclear ribonucleoprotein K OS=Homo sapiens GN=HNRNPK;sp|P61978|HNRPK_HUMAN Heterogeneous nuclear ribonucleoprotein K OS=Homo sapiens GN=HNRNPK PE=1 SV=1;sp|P61978-2|HNRPK_HUMAN Isoform 2 of Heterogeneous	48.562	440	1	1	0	2.5	2.5	0	1319800	1216800	0	0	0	0	0	0	0	0	0	0	28755000				228	791;1359;1809	True;True;True	812;1413;1877	3396;3397;6263;6264;8506;8507	4477;4478;8502;8503;11490;11491	4478;8503;11491
Q13835-2;Q13835	Q13835-2;Q13835	Plakophilin-1	PKP1	sp|Q13835-2|PKP1_HUMAN Isoform 1 of Plakophilin-1 OS=Homo sapiens GN=PKP1;sp|Q13835|PKP1_HUMAN Plakophilin-1 OS=Homo sapiens GN=PKP1 PE=1 SV=2	80.496	726	1	0	0	2.1	0	0	1875100	0	0	0	0	0	0	0	0	0	0	0	27046000				286	1010;1131;1720	True;True;True	1037;1161;1786	4364;4365;5077;8138;8139;8140	5757;5758;6809;10980;10981;10982	5757;6809;10981
P42766	P42766	60S ribosomal protein L35	RPL35	sp|P42766|RL35_HUMAN 60S ribosomal protein L35 OS=Homo sapiens GN=RPL35 PE=1 SV=2	14.551	123	1	0	0	8.1	0	0	9807600	0	0	0	0	0	0	0	0	0	0	0	23036000				190	2073	TRUE	2155	9536;9537;9538	12929;12930;12931	12930
P38398-6;P38398-5;P38398-3;P38398-8;P38398-4;P38398;P38398-7	P38398-6;P38398-5;P38398-3;P38398-8;P38398-4;P38398;P38398-7	Breast cancer type 1 susceptibility protein	BRCA1	sp|P38398-6|BRCA1_HUMAN Isoform 6 of Breast cancer type 1 susceptibility protein OS=Homo sapiens GN=BRCA1;sp|P38398-5|BRCA1_HUMAN Isoform 5 of Breast cancer type 1 susceptibility protein OS=Homo sapiens GN=BRCA1;sp|P38398-3|BRCA1_HUMAN Isoform 3 of Breast	78.164	699	0	0	0	0	0	0	0	0	0	0	0	0	0	0	0	0	0	0	22064000				184	755	TRUE	776	2956	3818	3818	72		585
P35326;P35325;P22532;P22531;Q9BYE4;Q96RM1	P35326;P35325;P22532;P22531;Q9BYE4;Q96RM1	Small proline-rich protein 2A;Small proline-rich protein 2B;Small proline-rich protein 2D;Small proline-rich protein 2E;Small proline-rich protein 2G;Small proline-rich protein 2F	SPRR2A;SPRR2B;SPRR2D;SPRR2E;SPRR2G;SPRR2F	sp|P35326|SPR2A_HUMAN Small proline-rich protein 2A OS=Homo sapiens GN=SPRR2A PE=1 SV=1;sp|P35325|SPR2B_HUMAN Small proline-rich protein 2B OS=Homo sapiens GN=SPRR2B PE=2 SV=1;sp|P22532|SPR2D_HUMAN Small proline-rich protein 2D OS=Homo sapiens GN=SPRR2D PE	7.9653	72	1	0	0	25	0	0	2173300	0	0	0	0	0	0	0	0	0	0	0	21651000				144	227;1519	True;True	233;1582	749;6853;6854	912;9196;9197	912;9196
Q00534	Q00534	Cyclin-dependent kinase 6	CDK6	sp|Q00534|CDK6_HUMAN Cyclin-dependent kinase 6 OS=Homo sapiens GN=CDK6 PE=1 SV=1	36.938	326	0	0	0	0	0	0	0	0	0	0	0	0	0	0	0	0	0	0	15901000				256	1448	TRUE	1508	6582	8861	8861
Q15366-7;Q15366-8;Q15366-4;Q15366-5;Q15366-6;Q15366-3;Q15366;Q15366-2;P57721-2;P57721-3;P57721-5;Q15365;P57721-4;P57721	Q15366-7;Q15366-8;Q15366-4;Q15366-5;Q15366-6;Q15366-3;Q15366;Q15366-2;P57721-2;P57721-3;P57721-5;Q15365;P57721-4;P57721	Poly(rC)-binding protein 2;Poly(rC)-binding protein 3;Poly(rC)-binding protein 1	PCBP2;PCBP3;PCBP1	sp|Q15366-7|PCBP2_HUMAN Isoform 7 of Poly(rC)-binding protein 2 OS=Homo sapiens GN=PCBP2;sp|Q15366-8|PCBP2_HUMAN Isoform 8 of Poly(rC)-binding protein 2 OS=Homo sapiens GN=PCBP2;sp|Q15366-4|PCBP2_HUMAN Isoform 4 of Poly(rC)-binding protein 2 OS=Homo sapien	33.496	318	0	0	0	0	0	0	0	0	0	0	0	0	0	0	0	0	0	0	15753000				307	470;781;876	True;True;True	486;802;902	1676;3381;3825;3826;3827	2005;4462;5008;5009;5010	2005;4462;5010
Q9H3K6-2;Q9H3K6	Q9H3K6-2;Q9H3K6	BolA-like protein 2	BOLA2	sp|Q9H3K6-2|BOLA2_HUMAN Isoform 2 of BolA-like protein 2 OS=Homo sapiens GN=BOLA2;sp|Q9H3K6|BOLA2_HUMAN BolA-like protein 2 OS=Homo sapiens GN=BOLA2 PE=1 SV=1	6.8417	58	1	0	0	27.6	0	0	4775300	0	0	0	0	0	0	0	0	0	0	0	14286000				380	268	TRUE	276	933;934	1130;1131	1131
P49756;P49756-2;P49756-3	P49756;P49756-2;P49756-3	RNA-binding protein 25	RBM25	sp|P49756|RBM25_HUMAN RNA-binding protein 25 OS=Homo sapiens GN=RBM25 PE=1 SV=3;sp|P49756-2|RBM25_HUMAN Isoform 2 of RNA-binding protein 25 OS=Homo sapiens GN=RBM25;sp|P49756-3|RBM25_HUMAN Isoform 3 of RNA-binding protein 25 OS=Homo sapiens GN=RBM25	100.18	843	0	0	0	0	0	0	0	0	0	0	0	0	0	0	0	0	0	0	14243000				203	500;1091	True;True	518;1120	1791;1792;4962	2157;2158;6686	2158;6686
Q8NHH1-2;Q8NHH1	Q8NHH1-2;Q8NHH1	Tubulin polyglutamylase TTLL11	TTLL11	sp|Q8NHH1-2|TTL11_HUMAN Isoform 2 of Tubulin polyglutamylase TTLL11 OS=Homo sapiens GN=TTLL11;sp|Q8NHH1|TTL11_HUMAN Tubulin polyglutamylase TTLL11 OS=Homo sapiens GN=TTLL11 PE=1 SV=2	58.035	538	0	0	0	0	0	0	0	0	0	0	0	0	0	0	0	0	0	0	13830000				340	3	TRUE	3	13;14	15;16	16
Q7KZF4	Q7KZF4	Staphylococcal nuclease domain-containing protein 1	SND1	sp|Q7KZF4|SND1_HUMAN Staphylococcal nuclease domain-containing protein 1 OS=Homo sapiens GN=SND1 PE=1 SV=1	102	910	0	0	0	0	0	0	0	0	0	0	0	0	0	0	0	0	0	0	13297000				329	1317;2040	True;True	1367;2121	6030;9428	8212;12805	8212;12805
P04083	P04083	Annexin A1	ANXA1	sp|P04083|ANXA1_HUMAN Annexin A1 OS=Homo sapiens GN=ANXA1 PE=1 SV=2	38.714	346	0	1	0	0	3.2	0	0	2245300	0	0	0	0	0	0	0	0	0	0	12719000				81	261;1885	True;True	269;1957	921;8815;8816	1118;11907;11908	1118;11907
P61313;P61313-2	P61313;P61313-2	60S ribosomal protein L15	RPL15	sp|P61313|RL15_HUMAN 60S ribosomal protein L15 OS=Homo sapiens GN=RPL15 PE=1 SV=2;sp|P61313-2|RL15_HUMAN Isoform 2 of 60S ribosomal protein L15 OS=Homo sapiens GN=RPL15	24.146	204	1	0	0	3.4	0	0	2081500	0	0	0	0	0	0	0	0	0	0	0	11538000				225	1416;1695	True;True	1475;1761	6488;8045;8046	8756;10881;10882	8756;10882
Q15020-4;Q15020	Q15020-4;Q15020	Squamous cell carcinoma antigen recognized by T-cells 3	SART3	sp|Q15020-4|SART3_HUMAN Isoform 4 of Squamous cell carcinoma antigen recognized by T-cells 3 OS=Homo sapiens GN=SART3;sp|Q15020|SART3_HUMAN Squamous cell carcinoma antigen recognized by T-cells 3 OS=Homo sapiens GN=SART3 PE=1 SV=1	105.58	927	0	0	0	0	0	0	0	0	0	0	0	0	0	0	0	0	0	0	11048000				303	131;337;1960	True;True;True	134;349;2039	389;1167;9091	455;1392;12214	455;1392;12214
O43707-3;O43707-2;O43707;P12814-2;P12814;P12814-3;P12814-4	O43707-3;O43707-2;O43707;P12814-2;P12814;P12814-3;P12814-4	Alpha-actinin-4;Alpha-actinin-1	ACTN4;ACTN1	sp|O43707-3|ACTN4_HUMAN Isoform 3 of Alpha-actinin-4 OS=Homo sapiens GN=ACTN4;sp|O43707-2|ACTN4_HUMAN Isoform ACTN4ISO of Alpha-actinin-4 OS=Homo sapiens GN=ACTN4;sp|O43707|ACTN4_HUMAN Alpha-actinin-4 OS=Homo sapiens GN=ACTN4 PE=1 SV=2;sp|P12814-2|ACTN1_HU	59.579	521	0	0	0	0	0	0	0	0	0	0	0	0	0	0	0	0	0	0	10940000				55	668;1841	True;True	687;1911	2558;8616	3283;11608	3283;11608
P04792	P04792	Heat shock protein beta-1	HSPB1	sp|P04792|HSPB1_HUMAN Heat shock protein beta-1 OS=Homo sapiens GN=HSPB1 PE=1 SV=2	22.782	205	0	0	0	0	0	0	0	0	0	0	0	0	0	0	0	0	0	0	10593000				86	1044	TRUE	1073	4474	5890	5890
Q14137;Q14137-2	Q14137;Q14137-2	Ribosome biogenesis protein BOP1	BOP1	sp|Q14137|BOP1_HUMAN Ribosome biogenesis protein BOP1 OS=Homo sapiens GN=BOP1 PE=1 SV=2;sp|Q14137-2|BOP1_HUMAN Isoform 2 of Ribosome biogenesis protein BOP1 OS=Homo sapiens GN=BOP1	83.629	746	0	0	0	0	0	0	0	0	0	0	0	0	0	0	0	0	0	0	9983900				289	1210;1921	True;True	1243;1996	5668;5669;8950	7801;7802;7803;12062	7803;12062
P07195	P07195	L-lactate dehydrogenase B chain	LDHB	sp|P07195|LDHB_HUMAN L-lactate dehydrogenase B chain OS=Homo sapiens GN=LDHB PE=1 SV=2	36.638	334	0	0	0	0	0	0	0	0	0	0	0	0	0	0	0	0	0	0	9800200				95	923;2027	True;False	949;2108	3997;3998;9405;9406	5267;5268;12782;12783	5267;12783
P63104	P63104	14-3-3 protein zeta/delta	YWHAZ	sp|P63104|1433Z_HUMAN 14-3-3 protein zeta/delta OS=Homo sapiens GN=YWHAZ PE=1 SV=1	27.745	245	0	0	0	0	0	0	0	0	0	0	0	0	0	0	0	0	0	0	8975500				240	1778	TRUE	1846	8381;8382	11345;11346	11346
P00742	P00742	Coagulation factor X;Factor X light chain;Factor X heavy chain;Activated factor Xa heavy chain	F10	sp|P00742|FA10_HUMAN Coagulation factor X OS=Homo sapiens GN=F10 PE=1 SV=2	54.731	488	1	0	0	1.8	0	0	8694400	0	0	0	0	0	0	0	0	0	0	0	8694400	+			72	1283	TRUE	1322	5856	8001	8001	38		379
P46779-4;P46779-5;P46779;P46779-2;P46779-3	P46779-4;P46779-5;P46779;P46779-2;P46779-3	60S ribosomal protein L28	RPL28	sp|P46779-4|RL28_HUMAN Isoform 4 of 60S ribosomal protein L28 OS=Homo sapiens GN=RPL28;sp|P46779-5|RL28_HUMAN Isoform 5 of 60S ribosomal protein L28 OS=Homo sapiens GN=RPL28;sp|P46779|RL28_HUMAN 60S ribosomal protein L28 OS=Homo sapiens GN=RPL28 PE=1 SV=3;	7.888	69	1	0	0	15.9	0	0	5758600	0	0	0	0	0	0	0	0	0	0	0	8451300				197	1551;1931	True;True	1614;2006	6993;8974	9380;12086	9380;12086
P18206-2;P18206	P18206-2;P18206	Vinculin	VCL	sp|P18206-2|VINC_HUMAN Isoform 1 of Vinculin OS=Homo sapiens GN=VCL;sp|P18206|VINC_HUMAN Vinculin OS=Homo sapiens GN=VCL PE=1 SV=4	116.72	1066	0	0	0	0	0	0	0	0	0	0	0	0	0	0	0	0	0	0	8172100				139	438;1771	True;True	453;1839	1565;8368	1880;11332	1880;11332
P49368-2;P49368	P49368-2;P49368	T-complex protein 1 subunit gamma	CCT3	sp|P49368-2|TCPG_HUMAN Isoform 2 of T-complex protein 1 subunit gamma OS=Homo sapiens GN=CCT3;sp|P49368|TCPG_HUMAN T-complex protein 1 subunit gamma OS=Homo sapiens GN=CCT3 PE=1 SV=4	56.43	507	0	0	0	0	0	0	0	0	0	0	0	0	0	0	0	0	0	0	8054300				202	198;1854	True;True	203;1924	664;8660	807;11655	807;11655
Q8WWM7-6;Q8WWM7-8;Q8WWM7-5;Q8WWM7-4;Q8WWM7-9;Q8WWM7-2;Q8WWM7;Q8WWM7-3	Q8WWM7-6;Q8WWM7-8;Q8WWM7-5;Q8WWM7-4;Q8WWM7-9;Q8WWM7-2;Q8WWM7;Q8WWM7-3	Ataxin-2-like protein	ATXN2L	sp|Q8WWM7-6|ATX2L_HUMAN Isoform 6 of Ataxin-2-like protein OS=Homo sapiens GN=ATXN2L;sp|Q8WWM7-8|ATX2L_HUMAN Isoform 8 of Ataxin-2-like protein OS=Homo sapiens GN=ATXN2L;sp|Q8WWM7-5|ATX2L_HUMAN Isoform 5 of Ataxin-2-like protein OS=Homo sapiens GN=ATXN2L;s	102.89	968	0	0	0	0	0	0	0	0	0	0	0	0	0	0	0	0	0	0	7029800				346	1864	TRUE	1934	8706;8707	11757;11758	11758
Q9H813;Q9H813-2	Q9H813;Q9H813-2	Transmembrane protein 206	TMEM206	sp|Q9H813|TM206_HUMAN Transmembrane protein 206 OS=Homo sapiens GN=TMEM206 PE=1 SV=1;sp|Q9H813-2|TM206_HUMAN Isoform 2 of Transmembrane protein 206 OS=Homo sapiens GN=TMEM206	40.043	350	0	0	0	0	0	0	0	0	0	0	0	0	0	0	0	0	0	0	6996300				381	1948	TRUE	2026	9062	12184	12184	105		242
P02545-2;P02545-6;P02545-3;P02545;P02545-5;P02545-4	P02545-2;P02545-6;P02545-3;P02545;P02545-5;P02545-4	Prelamin-A/C;Lamin-A/C	LMNA	sp|P02545-2|LMNA_HUMAN Isoform C of Prelamin-A/C OS=Homo sapiens GN=LMNA;sp|P02545-6|LMNA_HUMAN Isoform 6 of Prelamin-A/C OS=Homo sapiens GN=LMNA;sp|P02545-3|LMNA_HUMAN Isoform ADelta10 of Prelamin-A/C OS=Homo sapiens GN=LMNA;sp|P02545|LMNA_HUMAN Prelamin-	65.134	572	0	0	0	0	0	0	0	0	0	0	0	0	0	0	0	0	0	0	6935700				76	1165;1407	True;True	1198;1466	5210;6465	6974;8733	6974;8733
Q6IBW4-2;Q6IBW4;Q6IBW4-4	Q6IBW4-2;Q6IBW4;Q6IBW4-4	Condensin-2 complex subunit H2	NCAPH2	sp|Q6IBW4-2|CNDH2_HUMAN Isoform 2 of Condensin-2 complex subunit H2 OS=Homo sapiens GN=NCAPH2;sp|Q6IBW4|CNDH2_HUMAN Condensin-2 complex subunit H2 OS=Homo sapiens GN=NCAPH2 PE=1 SV=1;sp|Q6IBW4-4|CNDH2_HUMAN Isoform 4 of Condensin-2 complex subunit H2 OS=Ho	65.715	583	0	0	0	0	0	0	0	0	0	0	0	0	0	0	0	0	0	0	6896500				326	595;1723	True;True	614;1789	2279;2280;8146	2945;2946;10988	2945;10988
P27816-6;P27816;P27816-5;P27816-4;P27816-2	P27816-6;P27816;P27816-5;P27816-4;P27816-2	Microtubule-associated protein 4	MAP4	sp|P27816-6|MAP4_HUMAN Isoform 6 of Microtubule-associated protein 4 OS=Homo sapiens GN=MAP4;sp|P27816|MAP4_HUMAN Microtubule-associated protein 4 OS=Homo sapiens GN=MAP4 PE=1 SV=3;sp|P27816-5|MAP4_HUMAN Isoform 5 of Microtubule-associated protein 4 OS=Hom	119.96	1135	0	0	0	0	0	0	0	0	0	2	0	0	2.2	0	0	3342300	0	0	6827100				159	254;1002;1926	True;True;True	262;1029;2001	888;4347;8968;8969	1084;5739;12080;12081	1084;5739;12081
Q9Y3Y2-4;Q9Y3Y2;Q9Y3Y2-3	Q9Y3Y2-4;Q9Y3Y2;Q9Y3Y2-3	Chromatin target of PRMT1 protein	CHTOP	sp|Q9Y3Y2-4|CHTOP_HUMAN Isoform 3 of Chromatin target of PRMT1 protein OS=Homo sapiens GN=CHTOP;sp|Q9Y3Y2|CHTOP_HUMAN Chromatin target of PRMT1 protein OS=Homo sapiens GN=CHTOP PE=1 SV=2;sp|Q9Y3Y2-3|CHTOP_HUMAN Isoform 2 of Chromatin target of PRMT1 protei	21.918	202	1	0	0	6.4	0	0	3976700	0	0	0	0	0	0	0	0	0	0	0	6805700				400	181	TRUE	185;186	621;622;623;624	761;762;763;764	761	108		41
O60506-4;O43390-4;O60506-3;O60506-2;O60506;O43390;O43390-2	O60506-4;O43390-4;O60506-3;O60506-2;O60506;O43390;O43390-2	Heterogeneous nuclear ribonucleoprotein Q;Heterogeneous nuclear ribonucleoprotein R	SYNCRIP;HNRNPR	sp|O60506-4|HNRPQ_HUMAN Isoform 4 of Heterogeneous nuclear ribonucleoprotein Q OS=Homo sapiens GN=SYNCRIP;sp|O43390-4|HNRPR_HUMAN Isoform 4 of Heterogeneous nuclear ribonucleoprotein R OS=Homo sapiens GN=HNRNPR;sp|O60506-3|HNRPQ_HUMAN Isoform 3 of Heteroge	58.735	527	0	0	0	0	0	0	0	0	0	0	0	0	0	0	0	0	0	0	6592400				54	1831	TRUE	1900	8586;8587	11578;11579	11579
Q14204	Q14204	Cytoplasmic dynein 1 heavy chain 1	DYNC1H1	sp|Q14204|DYHC1_HUMAN Cytoplasmic dynein 1 heavy chain 1 OS=Homo sapiens GN=DYNC1H1 PE=1 SV=5	532.4	4646	4	0	0	0.9	0	0	5995300	0	0	0	0	0	0	0	0	0	0	0	5995300				291	329;499;557;1825	True;True;True;True	340;517;576;1894	1136;1790;2083;8566	1353;2156;2611;11558	1353;2156;2611;11558
P22735;P22735-2	P22735;P22735-2	Protein-glutamine gamma-glutamyltransferase K	TGM1	sp|P22735|TGM1_HUMAN Protein-glutamine gamma-glutamyltransferase K OS=Homo sapiens GN=TGM1 PE=1 SV=4;sp|P22735-2|TGM1_HUMAN Isoform 2 of Protein-glutamine gamma-glutamyltransferase K OS=Homo sapiens GN=TGM1	89.786	817	0	0	0	0	0	0	0	0	0	0	0	0	0	0	0	0	0	0	5559000				146	716;1031	True;True	737;1060	2739;4433;4434	3497;5834;5835	3497;5834
P23526-2;P23526	P23526-2;P23526	Adenosylhomocysteinase	AHCY	sp|P23526-2|SAHH_HUMAN Isoform 2 of Adenosylhomocysteinase OS=Homo sapiens GN=AHCY;sp|P23526|SAHH_HUMAN Adenosylhomocysteinase OS=Homo sapiens GN=AHCY PE=1 SV=4	44.658	404	0	0	0	0	0	0	0	0	0	0	0	0	0	0	0	0	0	0	5299600				150	2092	TRUE	2178	9598	12994	12994
Q96HA7-2;Q96HA7	Q96HA7-2;Q96HA7	Tonsoku-like protein	TONSL	sp|Q96HA7-2|TONSL_HUMAN Isoform 2 of Tonsoku-like protein OS=Homo sapiens GN=TONSL;sp|Q96HA7|TONSL_HUMAN Tonsoku-like protein OS=Homo sapiens GN=TONSL PE=1 SV=2	150.89	1378	0	0	0	0	0	0	0	0	0	0	0	0	0	0	0	0	0	0	5021000				360	132;1173	True;True	135;1206	390;5230	456;6998	456;6998
Q96AE4;Q96AE4-2	Q96AE4;Q96AE4-2	Far upstream element-binding protein 1	FUBP1	sp|Q96AE4|FUBP1_HUMAN Far upstream element-binding protein 1 OS=Homo sapiens GN=FUBP1 PE=1 SV=3;sp|Q96AE4-2|FUBP1_HUMAN Isoform 2 of Far upstream element-binding protein 1 OS=Homo sapiens GN=FUBP1	67.56	644	0	0	0	0	0	0	0	0	0	0	0	0	0	0	0	0	0	0	4814600				356	893	TRUE	919	3877;3878	5104;5105	5104
Q09028-3;Q09028	Q09028-3;Q09028	Histone-binding protein RBBP4	RBBP4	sp|Q09028-3|RBBP4_HUMAN Isoform 3 of Histone-binding protein RBBP4 OS=Homo sapiens GN=RBBP4;sp|Q09028|RBBP4_HUMAN Histone-binding protein RBBP4 OS=Homo sapiens GN=RBBP4 PE=1 SV=3	46.158	410	0	0	0	0	0	0	0	0	0	0	0	0	0	0	0	0	0	0	4085900				277	34	TRUE	34	78;79	81;82	82
Q5JTZ9	Q5JTZ9	Alanine--tRNA ligase, mitochondrial	AARS2	sp|Q5JTZ9|SYAM_HUMAN Alanine--tRNA ligase, mitochondrial OS=Homo sapiens GN=AARS2 PE=1 SV=1	107.34	985	0	0	0	0	0	0	0	0	0	0	0	0	0	0	0	0	0	0	3921100				321	1094	TRUE	1123	4965;4966	6689;6690	6690
P67809	P67809	Nuclease-sensitive element-binding protein 1	YBX1	sp|P67809|YBOX1_HUMAN Nuclease-sensitive element-binding protein 1 OS=Homo sapiens GN=YBX1 PE=1 SV=3	35.924	324	0	0	0	0	0	0	0	0	0	0	0	0	0	0	0	0	0	0	3486400				242	602	TRUE	621	2296	2962;2963	2962
O15294	O15294	UDP-N-acetylglucosamine--peptide N-acetylglucosaminyltransferase 110 kDa subunit	OGT	sp|O15294|OGT1_HUMAN UDP-N-acetylglucosamine--peptide N-acetylglucosaminyltransferase 110 kDa subunit OS=Homo sapiens GN=OGT PE=1 SV=3	116.92	1046	0	0	0	0	0	0	0	0	0	0	0	0	0	0	0	0	0	0	3463000				51	185	TRUE	190	630;631	770;771	770
Q16643;Q16643-2;Q16643-3	Q16643;Q16643-2;Q16643-3	Drebrin	DBN1	sp|Q16643|DREB_HUMAN Drebrin OS=Homo sapiens GN=DBN1 PE=1 SV=4;sp|Q16643-2|DREB_HUMAN Isoform 2 of Drebrin OS=Homo sapiens GN=DBN1;sp|Q16643-3|DREB_HUMAN Isoform 3 of Drebrin OS=Homo sapiens GN=DBN1	71.428	649	0	0	0	0	0	0	0	0	0	0	0	0	0	0	0	0	0	0	3457800				312	1724	TRUE	1790	8147	10989	10989
P27348	P27348	14-3-3 protein theta	YWHAQ	sp|P27348|1433T_HUMAN 14-3-3 protein theta OS=Homo sapiens GN=YWHAQ PE=1 SV=1	27.764	245	0	0	0	0	0	0	0	0	0	0	0	0	0	0	0	0	0	0	3388100				156	206	TRUE	211	684	827	827
P78371-2;P78371	P78371-2;P78371	T-complex protein 1 subunit beta	CCT2	sp|P78371-2|TCPB_HUMAN Isoform 2 of T-complex protein 1 subunit beta OS=Homo sapiens GN=CCT2;sp|P78371|TCPB_HUMAN T-complex protein 1 subunit beta OS=Homo sapiens GN=CCT2 PE=1 SV=4	52.717	488	0	0	0	0	0	0	0	0	0	0	0	0	0	0	0	0	0	0	3383600				250	611	TRUE	630	2316	2983	2983
Q9NP64-2;Q9NP64-3;Q9NP64	Q9NP64-2;Q9NP64-3;Q9NP64	Nucleolar protein of 40 kDa	ZCCHC17	sp|Q9NP64-2|NO40_HUMAN Isoform 2 of Nucleolar protein of 40 kDa OS=Homo sapiens GN=ZCCHC17;sp|Q9NP64-3|NO40_HUMAN Isoform 3 of Nucleolar protein of 40 kDa OS=Homo sapiens GN=ZCCHC17;sp|Q9NP64|NO40_HUMAN Nucleolar protein of 40 kDa OS=Homo sapiens GN=ZCCHC1	24.918	217	2	0	0	12.4	0	0	3375900	0	0	0	0	0	0	0	0	0	0	0	3375900				383	267;1975	True;True	275;2056	932;9278	1129;12645	1129;12645
Q14683	Q14683	Structural maintenance of chromosomes protein 1A	SMC1A	sp|Q14683|SMC1A_HUMAN Structural maintenance of chromosomes protein 1A OS=Homo sapiens GN=SMC1A PE=1 SV=2	143.23	1233	0	0	0	0	0	0	0	0	0	0	0	0	0	0	0	0	0	0	3199400				295	1146	TRUE	1178	5168	6930	6930
P31946-2;P31946	P31946-2;P31946	14-3-3 protein beta/alpha;14-3-3 protein beta/alpha, N-terminally processed	YWHAB	sp|P31946-2|1433B_HUMAN Isoform Short of 14-3-3 protein beta/alpha OS=Homo sapiens GN=YWHAB;sp|P31946|1433B_HUMAN 14-3-3 protein beta/alpha OS=Homo sapiens GN=YWHAB PE=1 SV=3	27.85	244	0	0	0	0	0	0	0	0	0	0	0	0	0	0	0	0	0	0	3151100				170	207	TRUE	212	685	828	828
Q16610-2;Q16610;Q16610-4;Q16610-3	Q16610-2;Q16610;Q16610-4;Q16610-3	Extracellular matrix protein 1	ECM1	sp|Q16610-2|ECM1_HUMAN Isoform 2 of Extracellular matrix protein 1 OS=Homo sapiens GN=ECM1;sp|Q16610|ECM1_HUMAN Extracellular matrix protein 1 OS=Homo sapiens GN=ECM1 PE=1 SV=2;sp|Q16610-4|ECM1_HUMAN Isoform 4 of Extracellular matrix protein 1 OS=Homo sapi	46.099	415	0	0	0	0	0	0	0	0	0	0	0	0	0	0	0	0	0	0	2705100				311	1420;1478	True;True	1479;1540	6493;6694	8761;9004	8761;9004
P06748-3;P06748-2;P06748	P06748-3;P06748-2;P06748	Nucleophosmin	NPM1	sp|P06748-3|NPM_HUMAN Isoform 3 of Nucleophosmin OS=Homo sapiens GN=NPM1;sp|P06748-2|NPM_HUMAN Isoform 2 of Nucleophosmin OS=Homo sapiens GN=NPM1;sp|P06748|NPM_HUMAN Nucleophosmin OS=Homo sapiens GN=NPM1 PE=1 SV=2	28.4	259	0	0	0	0	0	0	0	0	0	0	0	0	0	0	0	0	0	0	2625200				94	697	TRUE	716	2629	3355	3355
O75369-5;O75369-4;O75369-6;O75369-3;O75369-2;O75369-9;O75369;O75369-8;O75369-7	O75369-5;O75369-4;O75369-6;O75369-3;O75369-2;O75369-9;O75369;O75369-8;O75369-7	Filamin-B	FLNB	sp|O75369-5|FLNB_HUMAN Isoform 5 of Filamin-B OS=Homo sapiens GN=FLNB;sp|O75369-4|FLNB_HUMAN Isoform 4 of Filamin-B OS=Homo sapiens GN=FLNB;sp|O75369-6|FLNB_HUMAN Isoform 6 of Filamin-B OS=Homo sapiens GN=FLNB;sp|O75369-3|FLNB_HUMAN Isoform 3 of Filamin-B	230.29	2146	2	0	0	1	0	0	2427100	0	0	1	0	0	0.4	0	0	0	0	0	2427100				62	807;894;1970	True;False;True	828;920;2049	3440;3879;9251	4534;5106;12618	4534;5106;12618
Q14203-5;Q14203-2;Q14203-3;Q14203-4;Q14203-6;Q14203	Q14203-5;Q14203-2;Q14203-3;Q14203-4;Q14203-6;Q14203	Dynactin subunit 1	DCTN1	sp|Q14203-5|DCTN1_HUMAN Isoform 5 of Dynactin subunit 1 OS=Homo sapiens GN=DCTN1;sp|Q14203-2|DCTN1_HUMAN Isoform p135 of Dynactin subunit 1 OS=Homo sapiens GN=DCTN1;sp|Q14203-3|DCTN1_HUMAN Isoform 3 of Dynactin subunit 1 OS=Homo sapiens GN=DCTN1;sp|Q14203-	126.73	1139	0	0	0	0	0	0	0	0	0	0	0	0	0	0	0	0	0	0	2376100				290	437	TRUE	452	1563;1564	1878;1879	1878
P62847-2;P62847-3;P62847;P62847-4	P62847-2;P62847-3;P62847;P62847-4	40S ribosomal protein S24	RPS24	sp|P62847-2|RS24_HUMAN Isoform 2 of 40S ribosomal protein S24 OS=Homo sapiens GN=RPS24;sp|P62847-3|RS24_HUMAN Isoform 3 of 40S ribosomal protein S24 OS=Homo sapiens GN=RPS24;sp|P62847|RS24_HUMAN 40S ribosomal protein S24 OS=Homo sapiens GN=RPS24 PE=1 SV=1;	15.069	130	1	0	0	6.2	0	0	2123200	0	0	0	0	0	0	0	0	0	0	0	2123200	+			236	1287	TRUE	1327	5863	8008	8008	79		1
O75534-2;O75534;O75534-3;O75534-4	O75534-2;O75534;O75534-3;O75534-4	Cold shock domain-containing protein E1	CSDE1	sp|O75534-2|CSDE1_HUMAN Isoform 2 of Cold shock domain-containing protein E1 OS=Homo sapiens GN=CSDE1;sp|O75534|CSDE1_HUMAN Cold shock domain-containing protein E1 OS=Homo sapiens GN=CSDE1 PE=1 SV=2;sp|O75534-3|CSDE1_HUMAN Isoform 3 of Cold shock domain-co	85.746	767	0	0	0	0	0	0	0	0	0	0	0	0	0	0	0	0	0	0	2053300				63	1342	TRUE	1396	6137	8354	8354
P38159-2;P38159	P38159-2;P38159	RNA-binding motif protein, X chromosome;RNA-binding motif protein, X chromosome, N-terminally processed	RBMX	sp|P38159-2|RBMX_HUMAN Isoform 2 of RNA-binding motif protein, X chromosome OS=Homo sapiens GN=RBMX;sp|P38159|RBMX_HUMAN RNA-binding motif protein, X chromosome OS=Homo sapiens GN=RBMX PE=1 SV=3	40.846	378	0	0	0	0	0	0	0	0	0	0	0	0	0	0	0	0	0	0	1841300				183	1989	TRUE	2070	9317	12689	12689
P51610-2;P51610;P51610-4	P51610-2;P51610;P51610-4	Host cell factor 1;HCF N-terminal chain 1;HCF N-terminal chain 2;HCF N-terminal chain 3;HCF N-terminal chain 4;HCF N-terminal chain 5;HCF N-terminal chain 6;HCF C-terminal chain 1;HCF C-terminal chain 2;HCF C-terminal chain 3;HCF C-terminal chain 4;HCF C-terminal chain 5;HCF C-terminal chain 6	HCFC1	sp|P51610-2|HCFC1_HUMAN Isoform 2 of Host cell factor 1 OS=Homo sapiens GN=HCFC1;sp|P51610|HCFC1_HUMAN Host cell factor 1 OS=Homo sapiens GN=HCFC1 PE=1 SV=2;sp|P51610-4|HCFC1_HUMAN Isoform 4 of Host cell factor 1 OS=Homo sapiens GN=HCFC1	201.85	1966	0	0	0	0	0	0	0	0	0	0	0	0	0	0	0	0	0	0	1791100				207	1966	TRUE	2045	9105	12228	12228
P57740	P57740	Nuclear pore complex protein Nup107	NUP107	sp|P57740|NU107_HUMAN Nuclear pore complex protein Nup107 OS=Homo sapiens GN=NUP107 PE=1 SV=1	106.37	925	0	0	0	0	0	0	0	0	0	0	0	0	0	0	0	0	0	0	1788800				221	2066	TRUE	2148	9527	12920	12920
Q7L2J0	Q7L2J0	7SK snRNA methylphosphate capping enzyme	MEPCE	sp|Q7L2J0|MEPCE_HUMAN 7SK snRNA methylphosphate capping enzyme OS=Homo sapiens GN=MEPCE PE=1 SV=1	74.354	689	0	0	0	0	0	0	0	0	0	0	0	0	0	0	0	0	0	0	1526800				331	466	TRUE	482	1665	1994	1994
P78347-2;P78347-4;P78347-3;P78347;P78347-5	P78347-2;P78347-4;P78347-3;P78347;P78347-5	General transcription factor II-I	GTF2I	sp|P78347-2|GTF2I_HUMAN Isoform 2 of General transcription factor II-I OS=Homo sapiens GN=GTF2I;sp|P78347-4|GTF2I_HUMAN Isoform 4 of General transcription factor II-I OS=Homo sapiens GN=GTF2I;sp|P78347-3|GTF2I_HUMAN Isoform 3 of General transcription facto	107.97	957	0	0	0	0	0	0	0	0	0	0	0	0	0	0	0	0	0	0	1526200				249	1662;1773;1883	True;True;True	1728;1841;1955	7818;8370;8813	10499;11334;11905	10499;11334;11905
Q8TA86	Q8TA86	Retinitis pigmentosa 9 protein	RP9	sp|Q8TA86|RP9_HUMAN Retinitis pigmentosa 9 protein OS=Homo sapiens GN=RP9 PE=1 SV=2	26.106	221	0	0	0	0	0	0	0	0	0	0	0	0	0	0	0	0	0	0	1398300				342	1752	TRUE	1818	8284	11234	11234
Q07666-2;Q07666	Q07666-2;Q07666	KH domain-containing, RNA-binding, signal transduction-associated protein 1	KHDRBS1	sp|Q07666-2|KHDR1_HUMAN Isoform 2 of KH domain-containing, RNA-binding, signal transduction-associated protein 1 OS=Homo sapiens GN=KHDRBS1;sp|Q07666|KHDR1_HUMAN KH domain-containing, RNA-binding, signal transduction-associated protein 1 OS=Homo sapiens GN	45.86	418	0	0	0	0	0	0	0	0	0	0	0	0	0	0	0	0	0	0	1282900				270	851	TRUE	876	3752	4930	4930
Q99729-3;Q99729-4;Q99729-2;Q99729	Q99729-3;Q99729-4;Q99729-2;Q99729	Heterogeneous nuclear ribonucleoprotein A/B	HNRNPAB	sp|Q99729-3|ROAA_HUMAN Isoform 3 of Heterogeneous nuclear ribonucleoprotein A/B OS=Homo sapiens GN=HNRNPAB;sp|Q99729-4|ROAA_HUMAN Isoform 4 of Heterogeneous nuclear ribonucleoprotein A/B OS=Homo sapiens GN=HNRNPAB;sp|Q99729-2|ROAA_HUMAN Isoform 2 of Hetero	30.588	285	0	0	0	0	0	0	0	0	0	0	0	0	0	0	0	0	0	0	1056700				368	493	TRUE	511	1758	2103	2103
Q32P28-4;Q32P28;Q32P28-3	Q32P28-4;Q32P28;Q32P28-3	Prolyl 3-hydroxylase 1	LEPRE1	sp|Q32P28-4|P3H1_HUMAN Isoform 4 of Prolyl 3-hydroxylase 1 OS=Homo sapiens GN=P3H1;sp|Q32P28|P3H1_HUMAN Prolyl 3-hydroxylase 1 OS=Homo sapiens GN=P3H1 PE=1 SV=2;sp|Q32P28-3|P3H1_HUMAN Isoform 3 of Prolyl 3-hydroxylase 1 OS=Homo sapiens GN=P3H1	78.921	697	0	0	0	0	0	0	0	0	0	0	0	0	0	0	0	0	0	0	722870				314	1941	TRUE	2017	9036	12157	12157
O60216	O60216	Double-strand-break repair protein rad21 homolog	RAD21	sp|O60216|RAD21_HUMAN Double-strand-break repair protein rad21 homolog OS=Homo sapiens GN=RAD21 PE=1 SV=2	71.689	631	0	0	0	0	0	0	0	0	0	0	0	0	0	0	0	0	0	0	0				56	322	TRUE	333	1121;1122	1338;1339	1339
P61981	P61981	14-3-3 protein gamma;14-3-3 protein gamma, N-terminally processed	YWHAG	sp|P61981|1433G_HUMAN 14-3-3 protein gamma OS=Homo sapiens GN=YWHAG PE=1 SV=2	28.302	247	0	0	0	0	0	0	0	0	0	0	0	0	0	0	0	0	0	0	0				229	1430	TRUE	1490	6542	8819	8819
Q10567-4	Q10567-4			sp|Q10567-4|AP1B1_HUMAN Isoform 4 of AP-1 complex subunit beta-1 OS=Homo sapiens GN=AP1B1	101.35	919	0	0	0	0	0	0	0	0	0	0	0	0	0	0	0	0	0	0	0				278	201	TRUE	206	676	819	819
Q3SY69-3;Q3SY69	Q3SY69-3;Q3SY69	Mitochondrial 10-formyltetrahydrofolate dehydrogenase	ALDH1L2	sp|Q3SY69-3|AL1L2_HUMAN Isoform 3 of Mitochondrial 10-formyltetrahydrofolate dehydrogenase OS=Homo sapiens GN=ALDH1L2;sp|Q3SY69|AL1L2_HUMAN Mitochondrial 10-formyltetrahydrofolate dehydrogenase OS=Homo sapiens GN=ALDH1L2 PE=1 SV=2	57.244	516	0	0	0	0	0	0	0	0	0	0	0	0	0	0	0	0	0	0	0				315	143	TRUE	146	412	478	478	97		198
Q8WWZ4-2;Q8WWZ4	Q8WWZ4-2;Q8WWZ4	ATP-binding cassette sub-family A member 10	ABCA10	sp|Q8WWZ4-2|ABCAA_HUMAN Isoform 2 of ATP-binding cassette sub-family A member 10 OS=Homo sapiens GN=ABCA10;sp|Q8WWZ4|ABCAA_HUMAN ATP-binding cassette sub-family A member 10 OS=Homo sapiens GN=ABCA10 PE=2 SV=3	173.28	1520	0	0	1	0	0	0.6	0	0	0	0	0	0	0	0	0	0	0	0	0				347	352	TRUE	364	1233	1480	1480
Q9UII5	Q9UII5	Zinc finger protein 107	ZNF107	sp|Q9UII5|ZN107_HUMAN Zinc finger protein 107 OS=Homo sapiens GN=ZNF107 PE=2 SV=1	90.672	783	0	0	0	0	0	0	0	0	0	0	0	0	0	0	0	0	0	0	0	+			393	575	TRUE	594	2156	2756	2756		3		94
Q9Y265-2;Q9Y265	Q9Y265-2;Q9Y265	RuvB-like 1	RUVBL1	sp|Q9Y265-2|RUVB1_HUMAN Isoform 2 of RuvB-like 1 OS=Homo sapiens GN=RUVBL1;sp|Q9Y265|RUVB1_HUMAN RuvB-like 1 OS=Homo sapiens GN=RUVBL1 PE=1 SV=1	42.126	386	0	0	0	0	0	0	0	0	0	0	0	0	0	0	0	0	0	0	0				396	1446	TRUE	1506	6580	8859	8859

## Sheet: peptides
												Replicate 1 (R1)			Replicate 2 (R2)
Sequence	Proteins	Leading razor protein	Start position	End position	Gene names	Protein names	Unique (Groups)	Unique (Proteins)	Charges	PEP	Score	Intensity 190522_Untreat_R1	Intensity 190522_UV_minus_R1	Intensity 190522_UV_plus_R1	Intensity 190522_Untreat_R2	Intensity 190522_UV_minus_R2	Intensity 190522_UV_plus_R2	Reverse	Potential contaminant	id	Protein group IDs	Mod. peptide IDs	Evidence IDs	MS/MS IDs	Best MS/MS	Oxidation (M) site IDs	Tyr->BPA site IDs	MS/MS Count
FSGSGSGTDFTLK	A0A075B6S6;A0A075B6P5;P06310;P01615;P01614	A0A075B6S6	87	99	IGKV2D-30;IGKV2D-28	Ig kappa chain V-II region RPMI 6410;Ig kappa chain V-II region FR;Ig kappa chain V-II region Cum	yes	no	2	9.4741e-104	172.27	7140200000	2968200000	3997700000	395330000	492530000	804890000			573	0	592	2113;2114;2115;2116;2117;2118;2119;2120;2121;2122;2123;2124;2125;2126;2127;2128;2129;2130;2131;2132;2133;2134;2135;2136;2137;2138;2139;2140;2141;2142;2143;2144;2145;2146;2147;2148;2149	2641;2642;2643;2644;2645;2646;2647;2648;2649;2650;2651;2652;2653;2654;2655;2656;2657;2658;2659;2660;2661;2662;2663;2664;2665;2666;2667;2668;2669;2670;2671;2672;2673;2674;2675;2676;2677;2678;2679;2680;2681;2682;2683;2684;2685;2686;2687;2688;2689;2690;2691;2692;2693;2694;2695;2696;2697;2698;2699;2700;2701;2702;2703;2704;2705;2706;2707;2708;2709;2710;2711;2712;2713;2714;2715;2716;2717;2718;2719;2720…	2706			109
FSGSGSGTDFTLKISR	A0A075B6S6;A0A075B6P5;P06310;P01615;P01614	A0A075B6S6	87	102	IGKV2D-30;IGKV2D-28	Ig kappa chain V-II region RPMI 6410;Ig kappa chain V-II region FR;Ig kappa chain V-II region Cum	yes	no	3	0.0010384	58.83	2093900	1106200	0	0	0	1558200			574	0	593	2150;2151;2152;2153;2154;2155	2750;2751;2752;2753;2754;2755	2750			6
VDVGQQPLR	A0FGR8-2;A0FGR8;A0FGR8-6;A0FGR8-4	A0FGR8-2	212	220	ESYT2	Extended synaptotagmin-2	yes	no	2	0.0097298	81.784	0	0	0	0	0	0			1982	2	2063	9296	12665	12665			1
VLVALASEELAK	A0FGR8-2;A0FGR8;A0FGR8-6;A0FGR8-5	A0FGR8-2	863	874	ESYT2	Extended synaptotagmin-2	yes	no	2	0.0049513	61.56	0	0	0	0	0	0			2074	2	2156	9539	12932	12932			1
ILVATNLFGR	O00148;Q13838;Q13838-2	O00148	339	348	DDX39A;DDX39B	ATP-dependent RNA helicase DDX39A;Spliceosome RNA helicase DDX39B	yes	no	2	0.0028116	91.853	1246900	0	3173900	0	0	0			867	42	893	3804;3805;3806	4986;4987;4988;4989	4989			4
AAAAAEQQQFYLLLGNLLSPDNVVR	O00410	O00410	2	26	IPO5	Importin-5	yes	yes	3	1.6083e-05	45.784	0	0	0	0	0	0			2	43	2	12	14	14			1
SLVEIADTVPK	O00410;O00410-2;O00410-3	O00410	239	249	IPO5	Importin-5	yes	no	2	0.023485	46.158	0	0	0	0	0	0			1698	43	1764	8059	10895	10895			1
SPILVATAVAAR	O00571-2;O15523-2;O15523;O00571	O00571-2	476	487	DDX3X;DDX3Y	ATP-dependent RNA helicase DDX3X;ATP-dependent RNA helicase DDX3Y	yes	no	2	0.0021263	67.334	0	0	0	0	0	0			1719	44	1785	8135;8136;8137	10977;10978;10979	10979			3
VGSTSENITQK	O00571-2;O15523-2;O15523;O00571	O00571-2	392	402	DDX3X;DDX3Y	ATP-dependent RNA helicase DDX3X;ATP-dependent RNA helicase DDX3Y	yes	no	2	0.0058925	59.426	0	0	0	0	0	0			2018	44	2099	9387;9388	12764;12765	12764			2
VRPCVVYGGADIGQQIR	O00571-2;O15523-2;O15523;O00571	O00571-2	279	295	DDX3X;DDX3Y	ATP-dependent RNA helicase DDX3X;ATP-dependent RNA helicase DDX3Y	yes	no	3	0.019049	33.307	0	0	0	0	0	0			2113	44	2199	9688	13100	13100			1
QYPISLVLAPTR	O00571-2;O15523-2;O15523;O00571;O15523-3	O00571-2	249	260	DDX3X;DDX3Y	ATP-dependent RNA helicase DDX3X;ATP-dependent RNA helicase DDX3Y	yes	no	2	0.0019075	67.726	0	0	0	0	0	0			1562	44	1626	7030;7031;7032	9421;9422;9423	9421			3
MLDMGFEPQIR	O00571-2;O15523-2;O15523;O00571;Q92841-1;Q92841-3;Q92841-2;Q92841;P17844-2;P17844	Q92841-1	251	261	DDX3X;DDX3Y;DDX17;DDX5	ATP-dependent RNA helicase DDX3X;ATP-dependent RNA helicase DDX3Y;Probable ATP-dependent RNA helicase DDX17;Probable ATP-dependent RNA helicase DDX5	no	no	2	0.00041948	80.239	0	0	0	0	0	0			1282	44;351	1321	5853;5854;5855	7998;7999;8000	7999			3
LDSPSRSPSK	O14523;O14523-2	O14523	462	471	C2CD2L	C2 domain-containing protein 2-like	yes	no	2	0.0022033	66.073	4911100	5973800	6233800	0	0	22179000			1020	45	1049	4402;4403;4404;4405;4406;4407;4408	5799;5800;5801;5802;5803;5804;5805;5806;5807	5799			8
AAVSAFPTDSLER	O14654	O14654	1098	1110	IRS4	Insulin receptor substrate 4	yes	yes	2	0.030379	42.001	0	0	0	0	0	0			27	46	27	61	64	64			1
GAQDVAGGSNPGAHNPSANLAR	O14654	O14654	1177	1198	IRS4	Insulin receptor substrate 4	yes	yes	3	0.018981	29.118	0	0	0	0	0	0			610	46	629	2315	2982	2982			1
LLQEEEQER	O14654	O14654	1074	1082	IRS4	Insulin receptor substrate 4	yes	yes	2	0.024521	61.999	0	0	0	0	0	0			1128	46	1158	5073	6805	6805			1
ETLVYLTHLDYVDTER	O14980	O14980	459	474	XPO1	Exportin-1	yes	yes	3	0.00085268	64.65	0	0	0	0	0	0			473	47	489	1687;1688	2022;2023	2022			2
IYLDMLNVYK	O14980	O14980	713	722	XPO1	Exportin-1	yes	yes	2	0.032264	50.878	0	0	0	0	0	0			933	47	959	4019	5290	5290			1
MAKPEEVLVVENDQGEVVR	O14980	O14980	424	442	XPO1	Exportin-1	yes	yes	3	5.1449e-11	87.676	0	0	0	0	0	0			1259	47	1294;1295	5814;5815;5816;5817;5818	7959;7960;7961;7962;7963	7960	34		5
NVDILKDPETVK	O14980	O14980	675	686	XPO1	Exportin-1	yes	yes	2;3	0.0018851	62.466	0	0	0	0	0	0			1421	47	1480	6494;6495	8762;8763	8762			2
NPSSAAPVQSR	O15027-2;O15027-4;O15027-3;O15027;O15027-5	O15027-2	594	604	SEC16A	Protein transport protein Sec16A	yes	no	2	0.00056758	75.378	0	0	636710	1065300	0	693540			1388	48	1445	6388;6389;6390	8644;8645;8646	8644			3
PVTVPSIDDYGRDR	O15034	O15034	817	830	RIMBP2	RIMS-binding protein 2	yes	yes	2	0.0049632	54.982	451950000	149940000	157770000	0	0	0			1443	49	1503	6572;6573;6574;6575;6576	8851;8852;8853;8854;8855	8852			5
DASGQPIFNASAK	O15226;O15226-2	O15226	323	335	NKRF	NF-kappa-B-repressing factor	yes	no	2	0.02046	44.425	0	0	0	0	0	0			241	50	248	822	1013	1013			1
EVNEQTHFASMPR	O15226;O15226-2	O15226	82	94	NKRF	NF-kappa-B-repressing factor	yes	no	3	0.0014113	39.424	0	0	0	0	0	0			490	50	508	1752;1753	2097;2098	2097			2
GAVEDVISR	O15226;O15226-2	O15226	525	533	NKRF	NF-kappa-B-repressing factor	yes	no	2	0.027899	59.245	0	0	0	0	0	0			612	50	631	2317;2318	2984;2985	2984			2
LLTDGYACEVR	O15226;O15226-2	O15226	235	245	NKRF	NF-kappa-B-repressing factor	yes	no	2	0.019062	46.891	0	0	0	0	0	0			1136	50	1168	5114	6865	6865			1
MTVEYVYER	O15226;O15226-2	O15226	464	472	NKRF	NF-kappa-B-repressing factor	yes	no	2	0.016679	69.423	0	0	0	0	0	0			1300	50	1349	5983;5984	8159;8160	8160			2
SESHTDLTFSR	O15226;O15226-2	O15226	616	626	NKRF	NF-kappa-B-repressing factor	yes	no	3	3.221e-07	88.596	0	0	0	0	0	0			1632	50	1698	7623;7624	10259;10260	10260			2
TNPEYIYAPLK	O15226;O15226-2	O15226	212	222	NKRF	NF-kappa-B-repressing factor	yes	no	2	0.015386	48.423	0	0	0	0	0	0			1879	50	1951	8796	11888	11888			1
TQPTVINNLKK	O15226;O15226-2	O15226	514	524	NKRF	NF-kappa-B-repressing factor	yes	no	3	0.014654	30.331	0	0	0	0	0	0			1900	50	1972	8857	11950	11950			1
VILESEVIAEAVGVK	O15226;O15226-2	O15226	482	496	NKRF	NF-kappa-B-repressing factor	yes	no	2	0.026203	48.44	0	0	0	0	0	0			2031	50	2112	9415	12792	12792			1
YEAAGEAVK	O15226;O15226-2	O15226	501	509	NKRF	NF-kappa-B-repressing factor	yes	no	2	0.025857	60.91	0	0	0	0	0	0			2160	50	2248	9879	13318	13318			1
ASSVGNVADSTEPTKR	O15294	O15294	2	17	OGT	UDP-N-acetylglucosamine--peptide N-acetylglucosaminyltransferase 110 kDa subunit	yes	yes	2	0.0019981	71.555	0	0	0	0	0	0			185	51	190	630;631	770;771	770			2
KGNPDSVSNTPEMEQR	O15381;O15381-2	O15381	129	144	NVL	Nuclear valosin-containing protein-like	yes	no	3	0.025069	25.167	0	0	0	0	0	0			948	52	975	4064	5341	5341			1
EICLGIPDEASR	O15381;O15381-2;O15381-5;O15381-3;O15381-4	O15381	429	440	NVL	Nuclear valosin-containing protein-like	yes	no	2	0.0073224	52.79	0	0	0	0	0	0			389	52	402	1387	1669	1669			1
FEDVGGNDMTLK	O15381;O15381-2;O15381-5;O15381-3;O15381-4	O15381	264	275	NVL	Nuclear valosin-containing protein-like	yes	no	2	0.02457	44.309	0	0	0	0	0	0			521	52	539	1876	2281	2281			1
ILQTLCR	O15381;O15381-2;O15381-5;O15381-3;O15381-4	O15381	443	449	NVL	Nuclear valosin-containing protein-like	yes	no	2	0.026991	88.734	0	0	0	0	0	0			860	52	886	3783	4965	4965			1
LGTEPTSETQDELQR	O15381;O15381-2;O15381-5;O15381-3;O15381-4	O15381	516	530	NVL	Nuclear valosin-containing protein-like	yes	no	2	0.00013875	77.64	0	0	0	0	0	0			1064	52	1093	4782;4783	6324;6325	6325			2
VLVIGATNRPDSLDPALR	O15381;O15381-2;O15381-5;O15381-3;O15381-4	O15381	404	421	NVL	Nuclear valosin-containing protein-like	yes	no	3	0.00020443	68.919	0	0	0	0	0	0			2076	52	2158	9541	12934	12934			1
VLVIGATNRPDSLDPALRR	O15381;O15381-2;O15381-5;O15381-3;O15381-4	O15381	404	422	NVL	Nuclear valosin-containing protein-like	yes	no	4	0.015269	29.687	0	0	0	0	0	0			2077	52	2159	9542	12935	12935			1
VVNQLLTEMDGLEAR	O15381;O15381-2;O15381-5;O15381-3;O15381-4	O15381	701	715	NVL	Nuclear valosin-containing protein-like	yes	no	2	0.0089571	54.776	0	0	0	0	0	0			2141	52	2229	9812	13236	13236			1
YVDIGVLASDLQR	O15381;O15381-5	O15381	29	41	NVL	Nuclear valosin-containing protein-like	yes	no	2	1.0782e-07	95.573	0	0	0	0	0	0			2233	52	2323	10238;10239;10240	13810;13811;13812	13810			3
ALVTGYFMQVAHLER	O43143	O43143	692	706	DHX15	Pre-mRNA-splicing factor ATP-dependent RNA helicase DHX15	yes	yes	3	0.007204	45.863	0	0	0	0	0	0			136	53	139	398	464	464			1
ASTNAMLISAGLPPLK	O43143	O43143	63	78	DHX15	Pre-mRNA-splicing factor ATP-dependent RNA helicase DHX15	yes	yes	2	0.022664	52.693	0	0	0	0	0	0			186	53	191	632	772	772			1
EVDDLGPEVGDIK	O43143	O43143	372	384	DHX15	Pre-mRNA-splicing factor ATP-dependent RNA helicase DHX15	yes	yes	2	0.0080108	50.09	0	0	0	0	0	0			482	53	500	1727;1728	2072;2073	2073			2
SNLGSVVLQLK	O43143	O43143	505	515	DHX15	Pre-mRNA-splicing factor ATP-dependent RNA helicase DHX15	yes	yes	2	0.00074133	84.213	0	0	0	0	0	0			1712	53	1778	8114;8115	10956;10957	10957			2
TEMQDNTYPEILR	O43143	O43143	492	504	DHX15	Pre-mRNA-splicing factor ATP-dependent RNA helicase DHX15	yes	yes	2	3.7839e-06	87.298	0	0	0	0	0	0			1815	53	1883	8540;8541	11530;11531	11531			2
YGVIILDEAHER	O43143	O43143	254	265	DHX15	Pre-mRNA-splicing factor ATP-dependent RNA helicase DHX15	yes	yes	3	0.0013188	53.252	0	0	1236400	0	0	0			2189	53	2277	10032;10033	13555;13556	13555			2
GISQEQMQEFR	O43707-3;O43707-2;O43707	O43707-3	371	381	ACTN4	Alpha-actinin-4	yes	no	2	0.0035668	66.435	0	0	0	0	0	0			668	55	687	2558	3283	3283			1
TINEVENQILTR	O43707-3;O43707-2;O43707;P12814-2;P12814;P12814-3;P12814-4	O43707-3	356	367	ACTN4;ACTN1	Alpha-actinin-4;Alpha-actinin-1	yes	no	2	7.3844e-07	104.43	0	0	0	0	0	0			1841	55	1911	8616	11608	11608			1
DVIDEPIIEEPSR	O60216	O60216	438	450	RAD21	Double-strand-break repair protein rad21 homolog	yes	yes	2	5.8704e-10	83.397	0	0	0	0	0	0			322	56	333	1121;1122	1338;1339	1339			2
ESEITDEDIDGILER	O60264	O60264	666	680	SMARCA5	SWI/SNF-related matrix-associated actin-dependent regulator of chromatin subfamily A member 5	yes	yes	2	4.8134e-05	78.692	0	0	0	0	0	0			462	57	478	1660;1661	1989;1990	1990			2
FITDNTVEER	O60264	O60264	607	616	SMARCA5	SWI/SNF-related matrix-associated actin-dependent regulator of chromatin subfamily A member 5	yes	yes	2	5.8478e-05	107.57	0	0	0	0	0	0			543	57	562	1974;1975;1976;1977	2383;2384;2385;2386	2386			4
QNLLSVGDYR	O60264	O60264	133	142	SMARCA5	SWI/SNF-related matrix-associated actin-dependent regulator of chromatin subfamily A member 5	yes	yes	2	0.035958	53.756	0	0	0	0	0	0			1515	57	1578	6846	9189	9189			1
TLQTISLLGYMK	O60264	O60264	212	223	SMARCA5	SWI/SNF-related matrix-associated actin-dependent regulator of chromatin subfamily A member 5	yes	yes	2	0.0099984	47.823	0	0	0	0	0	0			1862	57	1932	8698	11746	11746			1
LRLDSIVIQQGR	O60264;P28370-2;P28370	O60264	625	636	SMARCA5;SMARCA1	SWI/SNF-related matrix-associated actin-dependent regulator of chromatin subfamily A member 5;Probable global transcription activator SNF2L1	yes	no	3	0.00089378	62.694	0	0	0	0	0	0			1182	57	1215	5258	7026	7026			1
ALYSTAMESIQGGAAR	O60331-4;O60331;O60331-2;O60331-3	O60331-4	352	367	PIP5K1C	Phosphatidylinositol 4-phosphate 5-kinase type-1 gamma	yes	no	2;3	7.5944e-13	98.353	0	0	0	0	0	0			138	58	141	400;401;402;403;404	466;467;468;469;470	470			5
FMSNTVFR	O60331-4;O60331;O60331-2;O60331-3	O60331-4	438	445	PIP5K1C	Phosphatidylinositol 4-phosphate 5-kinase type-1 gamma	yes	no	2	0.03144	67.032	0	0	0	0	0	0			559	58	578	2085	2613	2613			1
FYGLYCVQSGGK	O60331-4;O60331;O60331-2;O60331-3	O60331-4	220	231	PIP5K1C	Phosphatidylinositol 4-phosphate 5-kinase type-1 gamma	yes	no	2	0.003822	64.297	0	0	0	0	0	0			599	58	618	2291;2292	2957;2958	2958			2
GGALLAVKPLGPTAAFSASQIPSER	O60331-4;O60331;O60331-2;O60331-3	O60331-4	460	484	PIP5K1C	Phosphatidylinositol 4-phosphate 5-kinase type-1 gamma	yes	no	3	0.012031	26.13	0	0	0	0	0	0			637	58	656	2398;2399	3073;3074	3074			2
GVDASGETTYK	O60331-4;O60331;O60331-2;O60331-3	O60331-4	62	72	PIP5K1C	Phosphatidylinositol 4-phosphate 5-kinase type-1 gamma	yes	no	2	0.03528	44.203	0	0	0	0	0	0			730	58	751	2817	3618	3618			1
VVVMNNILPR	O60331-4;O60331;O60331-2;O60331-3	O60331-4	235	244	PIP5K1C	Phosphatidylinositol 4-phosphate 5-kinase type-1 gamma	yes	no	2	2.5986e-17	129.4	0	0	0	0	0	0			2145	58	2233	9825	13249	13249			1
LLPGYYMNLNQNPR	O60331-4;O60331;O60331-2;O60331-3;Q99755-2;O14986-3;Q99755-4;O14986;Q99755-3;O14986-2;Q99755	O60331-4	201	214	PIP5K1C;PIP5K1A;PIP5K1B	Phosphatidylinositol 4-phosphate 5-kinase type-1 gamma;Phosphatidylinositol 4-phosphate 5-kinase type-1 alpha;Phosphatidylinositol 4-phosphate 5-kinase type-1 beta	yes	no	2;3	5.8167e-09	99.653	0	0	0	0	0	0			1123	58	1152;1153	5046;5047;5048;5049;5050	6778;6779;6780;6781;6782	6778	35		5
TGYTLDVTTGQR	O60506-4;O43390-4;O60506-3;O60506-2;O60506;O43390;O43390-2	O60506-4	131	142	SYNCRIP;HNRNPR	Heterogeneous nuclear ribonucleoprotein Q;Heterogeneous nuclear ribonucleoprotein R	yes	no	2	0.0073224	52.79	0	0	0	0	0	0			1831	54	1900	8586;8587	11578;11579	11579			2
LSVQSNPSPQLR	O75152	O75152	125	136	ZC3H11A	Zinc finger CCCH domain-containing protein 11A	yes	yes	2	0.02453	44.318	0	0	0	0	0	0			1204	60	1237	5658	7791	7791			1
NLQEGNEVDSQSSIR	O75152	O75152	522	536	ZC3H11A	Zinc finger CCCH domain-containing protein 11A	yes	yes	2	0.0069848	68.551	0	0	0	0	0	0			1361	60	1415	6269	8508	8508			1
SVTVPEAENPR	O75152	O75152	713	723	ZC3H11A	Zinc finger CCCH domain-containing protein 11A	yes	yes	2	0.023485	46.158	0	0	0	0	0	0			1779	60	1847	8383	11347	11347			1
VQQSSESSTSSPSQHEATPGAR	O75152	O75152	485	506	ZC3H11A	Zinc finger CCCH domain-containing protein 11A	yes	yes	3	0.024007	27.61	0	0	0	0	0	0			2108	60	2194	9676	13087	13087			1
SNLNSLDEQEGVK	O75223	O75223	89	101	GGCT	Gamma-glutamylcyclotransferase	yes	yes	2	7.8708e-05	76.143	0	0	0	0	0	0			1713	61	1779	8116;8117;8118	10958;10959;10960	10958			3
IFAQDGEGQR	O75369-5;O75369-4;O75369-6;O75369-3;O75369-2;O75369-9;O75369;O75369-8;O75369-7	O75369-5	682	691	FLNB	Filamin-B	yes	no	2	0.0067562	69.423	1292700	0	0	0	0	0			807	62	828	3440	4534	4534			1
VAVTEGCQPSR	O75369-5;O75369-4;O75369-6;O75369-3;O75369-2;O75369-9;O75369;O75369-8;O75369-7	O75369-5	1320	1330	FLNB	Filamin-B	yes	no	2	0.0076956	53.683	1134500	0	0	0	0	0			1970	62	2049	9251	12618	12618			1
NITLDDASAPR	O75534-2;O75534;O75534-3;O75534-4	O75534-2	728	738	CSDE1	Cold shock domain-containing protein E1	yes	no	2	0.0058927	60.398	0	0	0	0	0	0			1342	63	1396	6137	8354	8354			1
ADLSGIASGGR	O75635-2;O75635	O75635-2	288	298	SERPINB7	Serpin B7	yes	no	2	0.0058918	54.982	0	0	0	0	0	0			40	64	40	95	100	100			1
LAVSAQSEPAR	O75691	O75691	2251	2261	UTP20	Small subunit processome component 20 homolog	yes	yes	2	0.0042568	65.305	0	848400	1052900	0	0	656040			1006	65	1033	4356;4357;4358	5748;5749;5750	5749			3
KPPLAAALGEAEPPGPVDATDLPK	O75909;O75909-4	O75909	375	398	CCNK	Cyclin-K	yes	no	3	0.00062858	35.016	0	0	0	0	0	0			962	66	989	4102	5396	5396			1
DLAHTPSQLEGLDPATEAR	O75909;O75909-4;O75909-2;O75909-1	O75909	30	48	CCNK	Cyclin-K	yes	no	3	0.00026872	61.87	0	0	0	0	0	0			264	66	272	927	1124	1124			1
AAVELEEPEDAR	O94906-2;O94906	O94906-2	409	420	PRPF6	Pre-mRNA-processing factor 6	yes	no	2	2.894e-07	107.15	0	0	0	0	0	0			25	67	25	54;55;56;57;58	57;58;59;60;61	57			5
ALEHVPNSVR	O94906-2;O94906	O94906-2	396	405	PRPF6	Pre-mRNA-processing factor 6	yes	no	3	0.016796	32.329	0	0	0	0	0	0			111	67	112	343	409	409			1
AVIGIGIEEEDRK	O94906-2;O94906	O94906-2	528	540	PRPF6	Pre-mRNA-processing factor 6	yes	no	3	0.015239	27.098	0	0	0	0	0	0			202	67	207	677	820	820			1
FELQHGTEEQQEEVR	O94906-2;O94906	O94906-2	844	858	PRPF6	Pre-mRNA-processing factor 6	yes	no	3	0.021365	32.152	0	0	0	0	0	0			527	67	545	1887	2292	2292			1
LETYENAR	O94906-2;O94906	O94906-2	443	450	PRPF6	Pre-mRNA-processing factor 6	yes	no	2	0.02586	75.854	0	0	0	0	0	0			1040	67	1069	4467	5883	5883			1
LEWVQDNIR	O94906-2;O94906	O94906-2	644	652	PRPF6	Pre-mRNA-processing factor 6	yes	no	2	0.024521	61.999	0	0	0	0	0	0			1042	67	1071	4472	5888	5888			1
LSQVSDSVSGQTVVDPK	O94906-2;O94906	O94906-2	255	271	PRPF6	Pre-mRNA-processing factor 6	yes	no	2	0.0072469	59.185	0	0	0	0	0	0			1199	67	1232	5334	7148	7148			1
ILTTIEDLDQKK	O95347-2;O95347	O95347-2	1015	1026	SMC2	Structural maintenance of chromosomes protein 2	yes	no	3	0.015765	27.664	0	0	0	0	0	0			866	68	892	3803	4985	4985			1
SLEDALAEAQR	O95347-2;O95347	O95347-2	298	308	SMC2	Structural maintenance of chromosomes protein 2	yes	no	2	0.02666	42.743	0	0	0	0	0	0			1679	68	1745	7934	10672	10672			1
AFAVGVQQVLLK	O95373	O95373	295	306	IPO7	Importin-7	yes	yes	2	0.00073539	69.825	0	0	0	0	0	0			59	69	59	175;176	202;203	202			2
AIFQTIQNR	O95373	O95373	964	972	IPO7	Importin-7	yes	yes	2	0.012041	67.032	0	0	0	0	0	0			86	69	86	249	279	279			1
VTLTSEEEAR	P00338;P00338-3;P00338-4	P00338	306	315	LDHA	L-lactate dehydrogenase A chain	yes	no	2	0.0012763	98.033	3516900	3636200	4477200	0	0	0			2128	70	2215	9746;9747;9748;9749;9750;9751	13160;13161;13162;13163;13164;13165	13163			6
IVSGKDYNVTANSK	P00338;P00338-3;P00338-5;P00338-2	P00338	77	90	LDHA	L-lactate dehydrogenase A chain	yes	no	3	0.0032705	45.992	0	0	0	0	0	0			927	70	953	4008	5278	5278			1
VIGSGCNLDSAR	P00338;P00338-3;P00338-5;P00338-2;P00338-4;Q6ZMR3;P07864;P07195	P00338	158	169	LDHA;LDHAL6A;LDHC;LDHB	L-lactate dehydrogenase A chain;L-lactate dehydrogenase A-like 6A;L-lactate dehydrogenase C chain;L-lactate dehydrogenase B chain	no	no	2	2.9625e-05	94.692	0	0	0	0	0	0			2027	70;95	2108	9405;9406	12782;12783	12783			2
ALESPERPFLAILGGAK	P00558-2;P00558	P00558-2	172	188	PGK1	Phosphoglycerate kinase 1	yes	no	3	0.025566	37.092	0	0	1008500	0	0	0			115	71	116	349	415	415			1
ITLPVDFVTADKFDENAK	P00558-2;P00558	P00558-2	252	269	PGK1	Phosphoglycerate kinase 1	yes	no	3	0.027241	32.091	0	0	2206400	0	0	0			915	71	941	3987	5255	5255			1
MLEVPYVDR	P00742	P00742	379	387	F10	Coagulation factor X;Factor X light chain;Factor X heavy chain;Activated factor Xa heavy chain	yes	yes	2	0.012963	45.718	8694400	0	0	0	0	0			1283	72	1322	5856	8001	8001	38		0
SLPGQNEDLVLTGYQVDK	P01040	P01040	72	89	CSTA	Cystatin-A;Cystatin-A, N-terminally processed	yes	yes	2	0.026899	59.306	0	0	0	0	0	0			1694	73	1760	8044	10880	10880			1
TNETYGKLEAVQYK	P01040	P01040	31	44	CSTA	Cystatin-A;Cystatin-A, N-terminally processed	yes	yes	3	4.9338e-06	82.543	0	0	0	0	0	0			1877	73	1949	8793;8794	11885;11886	11885			2
TQVVAGTNYYIK	P01040	P01040	45	56	CSTA	Cystatin-A;Cystatin-A, N-terminally processed	yes	yes	2	0.00025226	88.681	0	0	0	0	0	0			1904	73	1976	8864;8865	11957;11958	11957			2
EEQFNSTFR	P01859	P01859	172	180	IGHG2	Ig gamma-2 chain C region	yes	yes	2	7.123e-23	136.16	9155800	5016000	9281300	0	0	0			370	74	382	1310;1311;1312;1313;1314;1315;1316;1317;1318	1559;1560;1561;1562;1563;1564;1565;1566;1567;1568;1569	1569			11
TFTCTAAYPESK	P01876	P01876	201	212	IGHA1	Ig alpha-1 chain C region	yes	yes	2	0.0048144	62.303	0	0	0	0	0	0			1826	75	1895	8567	11559	11559			1
QEPSQGTTTFAVTSILR	P01876;P01877	P01876	283	299	IGHA1;IGHA2	Ig alpha-1 chain C region;Ig alpha-2 chain C region	yes	no	2;3	0.0037449	63.727	0	0	0	0	0	0			1469	75	1531	6655;6656	8955;8956	8955			2
SAVQGPPER	P01876;P01877	P01876	169	177	IGHA1;IGHA2	Ig alpha-1 chain C region;Ig alpha-2 chain C region	yes	no	2	0.011721	95.909	0	0	0	0	0	0			1602	75	1666	7457;7458;7459	10012;10013;10014	10012			3
LQEKEDLQELNDR	P02545-2;P02545-6;P02545-3;P02545	P02545-2	29	41	LMNA	Prelamin-A/C;Lamin-A/C	yes	no	3	0.026226	29.355	0	0	0	0	0	0			1165	76	1198	5210	6974	6974			1
NSNLVGAAHEELQQSR	P02545-2;P02545-6;P02545-3;P02545;P02545-5;P02545-4	P02545-2	281	296	LMNA	Prelamin-A/C;Lamin-A/C	yes	no	3	0.026143	37.083	0	0	0	0	0	0			1407	76	1466	6465	8733	8733			1
LAQMFSDMVLK	P02786	P02786	429	439	TFRC	Transferrin receptor protein 1;Transferrin receptor protein 1, serum form	yes	yes	2	0.017213	47.198	0	0	0	0	0	0			993	77	1020	4316	5699	5699			1
LAVDEEENADNNTK	P02786	P02786	40	53	TFRC	Transferrin receptor protein 1;Transferrin receptor protein 1, serum form	yes	yes	2	0.011596	48.741	0	0	0	0	0	0			1004	77	1031	4350	5742	5742			1
LLNENSYVPR	P02786	P02786	146	155	TFRC	Transferrin receptor protein 1;Transferrin receptor protein 1, serum form	yes	yes	2	0.00023264	103.56	0	0	0	0	0	0			1122	77	1151	5043;5044;5045	6775;6776;6777	6775			3
LRPVAAEVYGTER	P02788-2;P02788	P02788-2	49	61	LTF	Lactotransferrin;Lactoferricin-H;Kaliocin-1;Lactoferroxin-A;Lactoferroxin-B;Lactoferroxin-C	yes	no	3	0.0077844	39.424	0	0	0	0	0	0			1184	78	1217	5265	7033	7033			1
NLLFNDNTECLAR	P02788-2;P02788	P02788-2	615	627	LTF	Lactotransferrin;Lactoferricin-H;Kaliocin-1;Lactoferroxin-A;Lactoferroxin-B;Lactoferroxin-C	yes	no	2	2.5232e-15	93.058	0	0	0	0	0	0			1358	78	1412	6262	8501	8501			1
ADVLTTGAGNPVGDKLNVITVGPR	P04040	P04040	24	47	CAT	Catalase	yes	yes	3	1.4949e-05	52.061	0	0	0	0	0	0			43	79	43	108	113	113			1
FNTANDDNVTQVR	P04040	P04040	432	444	CAT	Catalase	yes	yes	2	3.9597e-10	103.22	0	0	0	0	0	0			561	79	580	2087;2088;2089;2090	2615;2616;2617;2618	2616			4
LVNANGEAVYCK	P04040	P04040	222	233	CAT	Catalase	yes	yes	2	0.013986	46.462	0	0	0	0	0	0			1235	79	1268	5733	7868	7868			1
PYQYPALTPEQK	P04075	P04075	2	13	ALDOA	Fructose-bisphosphate aldolase A	yes	yes	2	0.010117	47.603	1560900	0	1912200	0	0	0			1444	80	1504	6577;6578	8856;8857	8856			2
AAQEEYVKR	P04075;P04075-2	P04075	323	331	ALDOA	Fructose-bisphosphate aldolase A	yes	no	3	0.011718	37.191	0	0	1215700	0	0	0			19	80	19	38	41	41			1
ALANSLACQGK	P04075;P04075-2	P04075	332	342	ALDOA	Fructose-bisphosphate aldolase A	yes	no	2	1.3477e-32	114.5	0	0	0	0	0	0			103	80	104	302;303	334;335	334			2
ALQASALK	P04075;P04075-2	P04075	305	312	ALDOA	Fructose-bisphosphate aldolase A	yes	no	2	0.0021659	69.998	0	0	0	0	0	0			128	80	131	384	450	450			1
ELSDIAHR	P04075;P04075-2	P04075	15	22	ALDOA	Fructose-bisphosphate aldolase A	yes	no	2	0.0021146	68.422	0	0	0	0	0	0			434	80	449	1557	1872	1872			1
GILAADESTGSIAK	P04075;P04075-2	P04075	29	42	ALDOA	Fructose-bisphosphate aldolase A	yes	no	2	6.278e-07	88.441	6517800	0	0	0	0	0			664	80	683	2550;2551;2552	3275;3276;3277	3275			3
LQSIGTENTEENRR	P04075;P04075-2	P04075	44	57	ALDOA	Fructose-bisphosphate aldolase A	yes	no	3	4.0531e-05	59.898	0	0	0	0	0	0			1175	80	1208	5232;5233	7000;7001	7001			2
DITSDTSGDFR	P04083	P04083	167	177	ANXA1	Annexin A1	yes	yes	2	0.0058918	55.064	0	0	0	0	0	0			261	81	269	921	1118	1118			1
TPAQFDADELR	P04083	P04083	114	124	ANXA1	Annexin A1	yes	yes	2	0.00090073	72.643	0	2245300	0	0	0	0			1885	81	1957	8815;8816	11907;11908	11907			2
QLDNIVGER	P04259	P04259	224	232	KRT6B	Keratin, type II cytoskeletal 6B	yes	yes	2	0.014793	71.379	0	0	0	0	0	0			1496	82	1558	6787;6788	9124;9125	9125			2
AQYEDIAQK	P04264	P04264	356	364	KRT1	Keratin, type II cytoskeletal 1	yes	yes	2	1.0581e-05	113.7	370890000	299840000	200310000	296910000	37955000	53842000		+	168	83	172	543;544;545;546;547;548;549;550;551;552;553;554;555	651;652;653;654;655;656;657;658;659;660;661;662;663;664;665;666;667;668;669	662			19
AEAESLYQSK	P04264;CON__P04264	P04264	367	376	KRT1	Keratin, type II cytoskeletal 1	yes	no	2	9.544e-18	131.06	108190000	83849000	65204000	83187000	13491000	10666000		+	45	83	45	111;112;113;114;115;116;117;118;119;120;121;122	116;117;118;119;120;121;122;123;124;125;126;127;128;129;130;131;132;133;134;135;136;137;138;139;140;141;142;143	141			28
AEAESLYQSKYEELQITAGR	P04264;CON__P04264	P04264	367	386	KRT1	Keratin, type II cytoskeletal 1	yes	no	2;3	4.9292e-43	120.11	0	0	0	2459700	0	3655400		+	46	83	46	123;124;125;126;127;128;129;130;131;132;133	144;145;146;147;148;149;150;151;152;153;154;155;156	145			12
DVDGAYMTK	P04264;CON__P04264	P04264	290	298	KRT1	Keratin, type II cytoskeletal 1	yes	no	2	0.0036894	94.114	61224000	96863000	56188000	61988000	12141000	0		+	319	83	328;329	1088;1089;1090;1091;1092;1093;1094;1095;1096;1097;1098;1099;1100;1101;1102;1103;1104;1105;1106;1107;1108;1109;1110	1291;1292;1293;1294;1295;1296;1297;1298;1299;1300;1301;1302;1303;1304;1305;1306;1307;1308;1309;1310;1311;1312;1313;1314;1315;1316;1317;1318;1319;1320;1321;1322;1323;1324;1325;1326;1327	1315	39		28
FLEQQNQVLQTKWELLQQVDTSTR	P04264;CON__P04264	P04264	200	223	KRT1	Keratin, type II cytoskeletal 1	yes	no	2;3	0	190.91	0	0	0	0	0	0		+	552	83	571	2064;2065;2066;2067;2068	2590;2591;2592;2593;2594;2595;2596	2591			7
FSSCGGGGGSFGAGGGFGSR	P04264;CON__P04264	P04264	46	65	KRT1	Keratin, type II cytoskeletal 1	yes	no	2;3	2.8064e-156	226.59	88230000	39586000	57988000	53791000	0	0		+	578	83	597	2165;2166;2167;2168;2169;2170;2171;2172;2173;2174;2175;2176;2177;2178;2179;2180;2181;2182;2183;2184;2185;2186;2187;2188;2189;2190;2191;2192;2193;2194;2195;2196	2768;2769;2770;2771;2772;2773;2774;2775;2776;2777;2778;2779;2780;2781;2782;2783;2784;2785;2786;2787;2788;2789;2790;2791;2792;2793;2794;2795;2796;2797;2798;2799;2800;2801;2802;2803;2804;2805;2806;2807;2808;2809;2810;2811;2812;2813;2814;2815;2816;2817;2818;2819;2820;2821;2822;2823;2824;2825;2826;2827;2828;2829;2830;2831;2832;2833;2834;2835;2836;2837;2838	2822			71
FVSTTYSGVTR	P04264;CON__P04264	P04264	634	644	KRT1	Keratin, type II cytoskeletal 1	yes	no	2	0.0075956	53.751	0	0	0	0	0	0		+	596	83	615	2281	2947	2947			1
GENALKDAK	P04264;CON__P04264	P04264	433	441	KRT1	Keratin, type II cytoskeletal 1	yes	no	2	9.0909e-07	116.3	3073400	4625800	0	2737200	0	0		+	623	83	642	2353;2354;2355;2356;2357;2358	3023;3024;3025;3026;3027;3028;3029	3024			7
GGGGGGYGSGGSSYGSGGGSYGSGGGGGGGR	P04264;CON__P04264	P04264	519	549	KRT1	Keratin, type II cytoskeletal 1	yes	no	2;3;4	8.6147e-65	175.8	43971000	0	2556500	26870000	0	0		+	640	83	659	2415;2416;2417;2418;2419;2420;2421;2422;2423;2424;2425;2426;2427;2428;2429;2430;2431;2432	3095;3096;3097;3098;3099;3100;3101;3102;3103;3104;3105;3106;3107;3108;3109;3110;3111;3112;3113;3114;3115;3116;3117;3118;3119;3120;3121;3122	3121			28
GGSGGGGGGSSGGRGSGGGSSGGSIGGR	P04264;CON__P04264	P04264	589	616	KRT1	Keratin, type II cytoskeletal 1	yes	no	3	0.00026408	34.125	0	0	0	999480	0	0		+	652	83	671	2458;2459	3157;3158	3157			2
GSGGGSSGGSIGGR	P04264;CON__P04264	P04264	603	616	KRT1	Keratin, type II cytoskeletal 1	yes	no	2	9.4826e-11	101.93	6059600	4468900	815120	3366400	2044000	1062600		+	711	83	732	2706;2707;2708;2709;2710;2711;2712;2713;2714	3462;3463;3464;3465;3466;3467;3468;3469;3470	3467			9
GSGGGSSGGSIGGRGSSSGGVK	P04264;CON__P04264	P04264	603	624	KRT1	Keratin, type II cytoskeletal 1	yes	no	3	0.0095407	32.565	0	1811600	0	2796200	0	0		+	712	83	733	2715;2716	3471;3472	3472			2
GSYGSGGSSYGSGGGSYGSGGGGGGHGSYGSGSSSGGYR	P04264;CON__P04264	P04264	550	588	KRT1	Keratin, type II cytoskeletal 1	yes	no	3;4	3.8269e-271	192.63	0	0	0	1184500	0	0		+	727	83	748	2803;2804;2805;2806;2807;2808;2809;2810;2811;2812;2813	3592;3593;3594;3595;3596;3597;3598;3599;3600;3601;3602;3603;3604;3605;3606;3607;3608;3609;3610;3611;3612;3613;3614	3602			23
KDVDGAYMTK	P04264;CON__P04264	P04264	289	298	KRT1	Keratin, type II cytoskeletal 1	yes	no	2;3	4.3448e-14	117.02	7325700	7664400	2300900	2725700	0	0		+	942	83	968;969	4033;4034;4035;4036;4037;4038;4039;4040;4041;4042;4043;4044;4045;4046;4047;4048;4049;4050;4051	5307;5308;5309;5310;5311;5312;5313;5314;5315;5316;5317;5318;5319;5320;5321;5322;5323;5324;5325	5323	39		19
KQISNLQQSISDAEQR	P04264;CON__P04264	P04264	417	432	KRT1	Keratin, type II cytoskeletal 1	yes	no	2;3	2.8291e-42	132.23	7437600	3642700	4326600	4917900	1583000	0		+	967	83	994	4118;4119;4120;4121;4122;4123;4124;4125;4126;4127;4128;4129;4130	5414;5415;5416;5417;5418;5419;5420;5421;5422;5423;5424;5425;5426	5425			13
LALDLEIATYR	P04264;CON__P04264	P04264	473	483	KRT1	Keratin, type II cytoskeletal 1	yes	no	2	2.8708e-97	177.36	2618000	938690	2484100	4232100	986590	1029600		+	988	83	1015	4255;4256;4257;4258;4259;4260;4261;4262;4263;4264;4265;4266;4267;4268;4269;4270;4271;4272;4273;4274;4275;4276;4277;4278;4279;4280;4281;4282;4283;4284;4285;4286;4287;4288;4289;4290;4291;4292;4293;4294;4295;4296;4297;4298	5621;5622;5623;5624;5625;5626;5627;5628;5629;5630;5631;5632;5633;5634;5635;5636;5637;5638;5639;5640;5641;5642;5643;5644;5645;5646;5647;5648;5649;5650;5651;5652;5653;5654;5655;5656;5657;5658;5659;5660;5661;5662;5663;5664;5665;5666;5667;5668;5669;5670;5671;5672;5673;5674;5675;5676;5677;5678;5679;5680	5637			59
LDSELKNMQDMVEDYR	P04264;CON__P04264	P04264	252	267	KRT1	Keratin, type II cytoskeletal 1	yes	no	2;3	2.3882e-65	172.92	31044000	0	5774900	0	0	0		+	1019	83	1046;1047;1048	4383;4384;4385;4386;4387;4388;4389;4390;4391;4392;4393;4394;4395;4396;4397;4398;4399;4400;4401	5776;5777;5778;5779;5780;5781;5782;5783;5784;5785;5786;5787;5788;5789;5790;5791;5792;5793;5794;5795;5796;5797;5798	5787	40;41		23
LNDLEDALQQAK	P04264;CON__P04264	P04264	444	455	KRT1	Keratin, type II cytoskeletal 1	yes	no	2;3	1.0649e-64	161.17	215260000	73630000	82071000	95820000	0	30987000		+	1141	83	1173	5123;5124;5125;5126;5127;5128;5129;5130;5131;5132;5133;5134	6874;6875;6876;6877;6878;6879;6880;6881;6882;6883;6884;6885;6886;6887;6888;6889;6890;6891;6892	6890			19
LNDLEDALQQAKEDLAR	P04264;CON__P04264	P04264	444	460	KRT1	Keratin, type II cytoskeletal 1	yes	no	2;3	4.4775e-50	136.01	0	0	0	3761800	0	0		+	1142	83	1174	5135;5136;5137;5138;5139;5140;5141;5142;5143;5144	6893;6894;6895;6896;6897;6898;6899;6900;6901;6902;6903;6904;6905	6896			13
LRSEIDNVK	P04264;CON__P04264	P04264	408	416	KRT1	Keratin, type II cytoskeletal 1	no	no	2;3	0.00010334	108.74	7328600	5916000	8209000	12099000	0	0		+	1185	83	1218	5266;5267;5268;5269;5270;5271;5272;5273;5274;5275;5276;5277;5278;5279;5280;5281	7034;7035;7036;7037;7038;7039;7040;7041;7042;7043;7044;7045;7046;7047;7048;7049;7050;7051;7052;7053;7054;7055;7056;7057;7058;7059	7048			26
LRSEIDNVKK	P04264;CON__P04264	P04264	408	417	KRT1	Keratin, type II cytoskeletal 1	no	no	2;3	0.00010751	104.22	20196000	20257000	14665000	9159800	2518900	2280700		+	1186	83	1219	5282;5283;5284;5285;5286;5287;5288;5289;5290;5291;5292;5293;5294;5295;5296;5297;5298;5299;5300;5301	7060;7061;7062;7063;7064;7065;7066;7067;7068;7069;7070;7071;7072;7073;7074;7075;7076;7077;7078;7079;7080;7081;7082;7083;7084;7085;7086;7087;7088;7089;7090;7091;7092;7093;7094;7095;7096;7097;7098;7099;7100;7101;7102;7103;7104;7105;7106;7107;7108;7109;7110;7111;7112;7113;7114;7115	7084			53
MSGECAPNVSVSVSTSHTTISGGGSR	P04264;CON__P04264	P04264	493	518	KRT1	Keratin, type II cytoskeletal 1	yes	no	2;3	1.1716e-235	197.4	18971000	0	3791900	0	0	0		+	1292	83	1335;1336	5899;5900;5901;5902;5903;5904;5905;5906;5907;5908;5909;5910;5911;5912;5913;5914;5915;5916;5917;5918;5919;5920;5921;5922;5923;5924;5925;5926;5927;5928;5929;5930;5931;5932;5933;5934;5935;5936	8046;8047;8048;8049;8050;8051;8052;8053;8054;8055;8056;8057;8058;8059;8060;8061;8062;8063;8064;8065;8066;8067;8068;8069;8070;8071;8072;8073;8074;8075;8076;8077;8078;8079;8080;8081;8082;8083;8084;8085;8086;8087;8088;8089;8090;8091;8092;8093;8094;8095;8096;8097;8098;8099;8100;8101;8102;8103;8104;8105;8106;8107	8074	42		61
NKLNDLEDALQQAK	P04264;CON__P04264	P04264	442	455	KRT1	Keratin, type II cytoskeletal 1	yes	no	2;3	1.5501e-278	225.55	10995000	7261400	6835900	13146000	0	0		+	1346	83	1400	6150;6151;6152;6153;6154;6155;6156;6157;6158;6159;6160;6161;6162;6163;6164;6165;6166;6167;6168;6169;6170	8368;8369;8370;8371;8372;8373;8374;8375;8376;8377;8378;8379;8380;8381;8382;8383;8384;8385;8386;8387;8388;8389;8390;8391	8385			24
NKLNDLEDALQQAKEDLAR	P04264;CON__P04264	P04264	442	460	KRT1	Keratin, type II cytoskeletal 1	yes	no	3	1.5239e-17	100.97	0	0	0	0	0	0		+	1347	83	1401	6171;6172;6173;6174	8392;8393;8394;8395	8393			3
NMQDMVEDYR	P04264;CON__P04264	P04264	258	267	KRT1	Keratin, type II cytoskeletal 1	yes	no	2	8.9738e-110	182.53	232890000	125180000	138330000	109860000	10869000	9736900		+	1374	83	1428;1429;1430	6292;6293;6294;6295;6296;6297;6298;6299;6300;6301;6302;6303;6304;6305;6306;6307;6308;6309;6310;6311;6312;6313;6314;6315;6316;6317;6318;6319;6320;6321;6322;6323;6324;6325;6326;6327;6328;6329;6330;6331;6332;6333;6334;6335;6336;6337;6338;6339;6340;6341;6342;6343;6344;6345;6346;6347;6348	8531;8532;8533;8534;8535;8536;8537;8538;8539;8540;8541;8542;8543;8544;8545;8546;8547;8548;8549;8550;8551;8552;8553;8554;8555;8556;8557;8558;8559;8560;8561;8562;8563;8564;8565;8566;8567;8568;8569;8570;8571;8572;8573;8574;8575;8576;8577;8578;8579;8580;8581;8582;8583;8584;8585;8586;8587;8588;8589;8590;8591;8592;8593;8594;8595;8596;8597;8598;8599;8600;8601	8594	40;41		69
NMQDMVEDYRNK	P04264;CON__P04264	P04264	258	269	KRT1	Keratin, type II cytoskeletal 1	yes	no	2;3	9.8953e-05	96.342	0	0	0	0	0	0		+	1375	83	1431	6349;6350;6351;6352	8602;8603;8604;8605	8605			4
NSKIEISELNR	P04264;CON__P04264	P04264	393	403	KRT1	Keratin, type II cytoskeletal 1	yes	no	2;3	8.8354e-116	182.65	0	0	0	0	0	0		+	1403	83	1462	6452;6453;6454;6455;6456;6457;6458;6459;6460	8708;8709;8710;8711;8712;8713;8714;8715;8716;8717;8718;8719;8720;8721;8722;8723;8724;8725;8726;8727;8728	8713			21
QISNLQQSISDAEQR	P04264;CON__P04264	P04264	418	432	KRT1	Keratin, type II cytoskeletal 1	yes	no	2;3	7.9381e-259	221.6	193470000	147110000	43789000	96224000	37874000	40752000		+	1487	83	1549	6726;6727;6728;6729;6730;6731;6732;6733;6734;6735;6736;6737;6738;6739;6740;6741;6742;6743;6744;6745;6746;6747;6748;6749;6750;6751;6752;6753;6754;6755;6756;6757;6758	9043;9044;9045;9046;9047;9048;9049;9050;9051;9052;9053;9054;9055;9056;9057;9058;9059;9060;9061;9062;9063;9064;9065;9066;9067;9068;9069;9070;9071;9072;9073;9074;9075;9076;9077;9078;9079;9080;9081;9082;9083;9084;9085;9086;9087;9088;9089;9090;9091;9092	9087			50
QISNLQQSISDAEQRGENALK	P04264;CON__P04264	P04264	418	438	KRT1	Keratin, type II cytoskeletal 1	yes	no	3	2.4983e-86	147.64	0	0	0	0	0	0		+	1488	83	1550	6759;6760;6761;6762;6763;6764	9093;9094;9095;9096;9097;9098;9099	9096			7
QISNLQQSISDAEQRGENALKDAK	P04264;CON__P04264	P04264	418	441	KRT1	Keratin, type II cytoskeletal 1	yes	no	3;4	2.4117e-75	138.66	0	0	0	0	0	0		+	1489	83	1551	6765;6766;6767;6768;6769;6770;6771;6772;6773	9100;9101;9102;9103;9104;9105;9106;9107;9108;9109;9110	9102			11
RTNAENEFVTIK	P04264;CON__P04264	P04264	277	288	KRT1	Keratin, type II cytoskeletal 1	yes	no	2	0.012282	51.092	0	0	0	0	0	0		+	1591	83	1655	7424;7425	9975;9976	9975			2
SEIDNVK	P04264;CON__P04264	P04264	410	416	KRT1	Keratin, type II cytoskeletal 1	no	no	2	0.0049782	94.163	0	0	0	0	0	0		+	1623	83	1689	7588;7589	10209;10210	10209			2
SEIDNVKK	P04264;CON__P04264	P04264	410	417	KRT1	Keratin, type II cytoskeletal 1	no	no	2	1.1632e-08	121.99	0	0	0	0	0	0		+	1624	83	1690	7590;7591;7592;7593;7594;7595	10211;10212;10213;10214;10215;10216	10211			6
SGGGFSSGSAGIINYQR	P04264;CON__P04264	P04264	13	29	KRT1	Keratin, type II cytoskeletal 1	yes	no	2;3	2.7308e-242	209.85	15538000	0	8906800	0	0	22985000		+	1647	83	1713	7678;7679;7680;7681;7682;7683;7684;7685;7686;7687;7688;7689;7690	10314;10315;10316;10317;10318;10319;10320;10321;10322;10323;10324;10325;10326;10327;10328;10329;10330;10331	10325			18
SISISVAR	P04264;CON__P04264	P04264	75	82	KRT1	Keratin, type II cytoskeletal 1	yes	no	2	2.9168e-21	134.06	96792000	46745000	38344000	60853000	0	37594000		+	1667	83	1733	7835;7836;7837;7838;7839;7840;7841;7842;7843;7844	10520;10521;10522;10523;10524;10525;10526;10527;10528;10529;10530	10526			11
SKAEAESLYQSK	P04264;CON__P04264	P04264	365	376	KRT1	Keratin, type II cytoskeletal 1	yes	no	2;3	5.7484e-137	189.13	255080000	189470000	124580000	128170000	20047000	21583000		+	1672	83	1738	7859;7860;7861;7862;7863;7864;7865;7866;7867;7868;7869;7870;7871;7872;7873;7874;7875;7876;7877;7878;7879;7880;7881;7882;7883;7884	10547;10548;10549;10550;10551;10552;10553;10554;10555;10556;10557;10558;10559;10560;10561;10562;10563;10564;10565;10566;10567;10568;10569;10570;10571;10572;10573;10574;10575;10576;10577;10578;10579;10580;10581;10582;10583;10584;10585;10586;10587;10588;10589;10590;10591;10592;10593;10594;10595;10596;10597;10598;10599;10600;10601;10602;10603;10604;10605;10606;10607;10608;10609;10610;10611;10612	10602			66
SKAEAESLYQSKYEELQITAGR	P04264;CON__P04264	P04264	365	386	KRT1	Keratin, type II cytoskeletal 1	yes	no	4	9.5077e-16	92.29	0	0	0	0	0	0		+	1673	83	1739	7885;7886;7887;7888;7889;7890;7891;7892;7893;7894	10613;10614;10615;10616;10617;10618;10619;10620;10621;10622;10623;10624;10625;10626	10620			14
SLDLDSIIAEVK	P04264;CON__P04264	P04264	344	355	KRT1	Keratin, type II cytoskeletal 1	no	no	2;3	1.0744e-79	166.34	264720000	7090800	51390000	13533000	11250000	12126000		+	1678	83	1744	7915;7916;7917;7918;7919;7920;7921;7922;7923;7924;7925;7926;7927;7928;7929;7930;7931;7932;7933	10653;10654;10655;10656;10657;10658;10659;10660;10661;10662;10663;10664;10665;10666;10667;10668;10669;10670;10671	10659			19
SLVNLGGSK	P04264;CON__P04264	P04264	66	74	KRT1	Keratin, type II cytoskeletal 1	yes	no	2	6.9504e-14	106.36	0	0	109250000	177400000	0	70937000		+	1700	83	1766	8070;8071;8072;8073;8074;8075;8076;8077;8078;8079;8080;8081	10909;10910;10911;10912;10913;10914;10915;10916;10917;10918;10919;10920	10917			12
SLVNLGGSKSISISVAR	P04264;CON__P04264	P04264	66	82	KRT1	Keratin, type II cytoskeletal 1	yes	no	3	0.01802	42.382	0	0	0	0	0	0		+	1701	83	1767	8082	10921	10921			1
SRQFSSR	P04264;CON__P04264	P04264	2	8	KRT1	Keratin, type II cytoskeletal 1	yes	no	2	1.3854e-52	157.58	0	4874300	3017800	2812100	3130100	0		+	1744	83	1810	8234;8235;8236;8237;8238;8239	11133;11134;11135;11136;11137;11138	11133			6
SRQFSSRSGYR	P04264;CON__P04264	P04264	2	12	KRT1	Keratin, type II cytoskeletal 1	yes	no	3	0.00038635	55.452	3580000	0	0	0	0	0		+	1745	83	1811	8240;8241;8242	11139;11140;11141	11140			3
THNLEPYFESFINNLR	P04264;CON__P04264	P04264	224	239	KRT1	Keratin, type II cytoskeletal 1	yes	no	2;3	0	214.45	0	0	0	0	0	0		+	1833	83	1902	8589;8590;8591	11581;11582;11583	11581			3
TNAENEFVTIK	P04264;CON__P04264	P04264	278	288	KRT1	Keratin, type II cytoskeletal 1	yes	no	2	1.4957e-06	105.98	288990000	192100000	147420000	229590000	0	32925000		+	1873	83	1945	8759;8760;8761;8762;8763;8764;8765;8766;8767;8768;8769	11813;11814;11815;11816;11817;11818;11819;11820;11821;11822;11823;11824;11825;11826;11827;11828;11829;11830;11831;11832;11833	11827			21
TNAENEFVTIKK	P04264;CON__P04264	P04264	278	289	KRT1	Keratin, type II cytoskeletal 1	yes	no	2;3	2.5084e-20	126.71	216080000	118340000	126450000	118990000	23396000	36924000		+	1874	83	1946	8770;8771;8772;8773;8774;8775;8776;8777;8778;8779;8780;8781;8782;8783;8784;8785;8786;8787;8788;8789;8790	11834;11835;11836;11837;11838;11839;11840;11841;11842;11843;11844;11845;11846;11847;11848;11849;11850;11851;11852;11853;11854;11855;11856;11857;11858;11859;11860;11861;11862;11863;11864;11865;11866;11867;11868;11869;11870;11871;11872;11873;11874;11875;11876;11877;11878;11879;11880;11881;11882	11873			49
VDQLKSDQSR	P04264;CON__P04264	P04264	242	251	KRT1	Keratin, type II cytoskeletal 1	yes	no	3	0.009481	47.302	0	0	0	0	0	0		+	1980	83	2061	9292	12661	12661			1
WELLQQVDTSTR	P04264;CON__P04264	P04264	212	223	KRT1	Keratin, type II cytoskeletal 1	yes	no	2;3	8.925e-117	185.14	278170000	0	0	0	0	0		+	2150	83	2238	9841;9842;9843;9844;9845;9846;9847;9848;9849	13265;13266;13267;13268;13269;13270;13271;13272;13273;13274;13275	13265			11
DYQELMNTK	P04264;CON__P04264;CON__ENSEMBL:ENSBTAP00000038253	P04264	464	472	KRT1	Keratin, type II cytoskeletal 1	no	no	2	8.7241e-32	140.5	88383000	38845000	33606000	53903000	0	0		+	330	83;7	341;342	1137;1138;1139;1140;1141;1142;1143;1144;1145;1146;1147;1148;1149;1150;1151;1152	1354;1355;1356;1357;1358;1359;1360;1361;1362;1363;1364;1365;1366;1367;1368;1369;1370;1371;1372;1373;1374;1375	1359	1		22
LLRDYQELMNTK	P04264;CON__P04264;CON__ENSEMBL:ENSBTAP00000038253	P04264	461	472	KRT1	Keratin, type II cytoskeletal 1	no	no	2;3	1.1045e-40	147.37	0	0	0	2694500	0	0		+	1132	83;7	1162;1163	5078;5079;5080;5081;5082;5083;5084;5085;5086;5087;5088;5089;5090;5091;5092;5093;5094;5095	6810;6811;6812;6813;6814;6815;6816;6817;6818;6819;6820;6821;6822;6823;6824;6825;6826;6827;6828;6829;6830;6831;6832;6833;6834;6835;6836;6837;6838;6839;6840;6841;6842	6827	1		33
SDQSRLDSELK	P04264;CON__P04264;CON__ENSEMBL:ENSBTAP00000038253	P04264	247	257	KRT1	Keratin, type II cytoskeletal 1	no	no	2;3	0.00029397	83.499	0	0	0	0	0	0		+	1615	83;7	1681	7570;7571;7572;7573	10186;10187;10188;10189;10190;10191;10192;10193;10194	10190			9
SLNNQFASFIDK	P04264;CON__P04264;CON__ENSEMBL:ENSBTAP00000038253	P04264	186	197	KRT1	Keratin, type II cytoskeletal 1	no	no	2	2.6125e-29	138.25	477330000	280320000	302390000	341240000	56200000	38325000		+	1691	83;7	1757	8004;8005;8006;8007;8008;8009;8010;8011;8012;8013;8014;8015;8016	10816;10817;10818;10819;10820;10821;10822;10823;10824;10825;10826;10827;10828;10829;10830;10831;10832;10833;10834;10835;10836;10837;10838;10839;10840;10841;10842;10843	10826			28
SLNNQFASFIDKVR	P04264;CON__P04264;CON__ENSEMBL:ENSBTAP00000038253	P04264	186	199	KRT1	Keratin, type II cytoskeletal 1	no	no	2;3	5.5104e-168	220.1	3268300	0	4801000	14562000	1880200	21797000		+	1692	83;7	1758	8017;8018;8019;8020;8021;8022;8023;8024;8025;8026;8027;8028;8029;8030;8031;8032;8033;8034;8035;8036;8037;8038;8039;8040	10844;10845;10846;10847;10848;10849;10850;10851;10852;10853;10854;10855;10856;10857;10858;10859;10860;10861;10862;10863;10864;10865;10866;10867;10868;10869;10870;10871;10872;10873;10874;10875;10876	10861			30
TLLEGEESR	P04264;CON__P04264;CON__ENSEMBL:ENSBTAP00000038253	P04264	484	492	KRT1	Keratin, type II cytoskeletal 1	no	no	2	7.6099e-32	141.39	325990000	124430000	157390000	250840000	0	74284000		+	1856	83;7	1926	8673;8674;8675;8676;8677;8678;8679;8680;8681;8682;8683	11685;11686;11687;11688;11689;11690;11691;11692;11693;11694;11695;11696;11697;11698;11699;11700;11701;11702;11703;11704;11705;11706;11707;11708;11709;11710;11711;11712;11713;11714;11715;11716;11717;11718;11719;11720;11721;11722;11723;11724;11725;11726;11727	11717			43
NKYEDEINK	P04264;CON__P04264;CON__H-INV:HIT000016045;CON__P04259;CON__Q8VED5;CON__H-INV:HIT000292931;CON__P02538;P02538;CON__P13647;P13647;CON__P48668;P48668;P04259	P04264	268	276	KRT1;KRT6A;KRT5;KRT6C;KRT6B	Keratin, type II cytoskeletal 1;Keratin, type II cytoskeletal 6A;Keratin, type II cytoskeletal 5;Keratin, type II cytoskeletal 6C;Keratin, type II cytoskeletal 6B	no	no	2;3	0.0017923	80.688	0	3522900	2474000	2697200	0	0		+	1351	83;20;26;82;12;31	1405	6202;6203;6204;6205;6206	8429;8430;8431;8432;8433	8431			5
NKYEDEINKR	P04264;CON__P04264;CON__H-INV:HIT000016045;CON__P04259;CON__Q8VED5;CON__P02538;P02538;CON__P13647;P13647;CON__P48668;P48668;P04259	P04264	268	277	KRT1;KRT6A;KRT5;KRT6C;KRT6B	Keratin, type II cytoskeletal 1;Keratin, type II cytoskeletal 6A;Keratin, type II cytoskeletal 5;Keratin, type II cytoskeletal 6C;Keratin, type II cytoskeletal 6B	no	no	3	1.4776e-27	118.03	8289500	2904100	2466700	0	0	0		+	1352	83;20;26;82;12;31	1406	6207;6208;6209;6210;6211;6212;6213;6214;6215;6216;6217;6218;6219;6220;6221;6222;6223;6224;6225;6226;6227;6228;6229;6230;6231;6232;6233;6234	8434;8435;8436;8437;8438;8439;8440;8441;8442;8443;8444;8445;8446;8447;8448;8449;8450;8451;8452;8453;8454;8455;8456;8457;8458;8459;8460;8461;8462;8463;8464;8465;8466;8467;8468;8469;8470;8471;8472;8473	8438			40
YEDEINKR	P04264;CON__P04264;CON__H-INV:HIT000016045;CON__P35908;CON__P35908v2;P35908;CON__P04259;CON__Q8VED5;CON__ENSEMBL:ENSBTAP00000038253;CON__P02538;P02538;CON__P13647;P13647;CON__P48668;P48668;CON__Q7Z794;Q7Z794;P04259;P12035;CON__P12035;Q01546;CON__Q01546	P04264	270	277	KRT1;KRT2;KRT6A;KRT5;KRT6C;KRT77;KRT6B;KRT3;KRT76	Keratin, type II cytoskeletal 1;Keratin, type II cytoskeletal 2 epidermal;Keratin, type II cytoskeletal 6A;Keratin, type II cytoskeletal 5;Keratin, type II cytoskeletal 6C;Keratin, type II cytoskeletal 1b;Keratin, type II cytoskeletal 6B;Keratin, type II cytoskeletal 3;Keratin, type II cytoskeletal 2 oral	no	no	2;3	2.2459e-85	191.03	60905000	27297000	25568000	33149000	5538300	0		+	2162	83;29;30;20;26;82;12;31;39;7;119;261	2250	9881;9882;9883;9884;9885;9886;9887;9888;9889;9890;9891;9892;9893;9894;9895;9896;9897;9898;9899;9900	13320;13321;13322;13323;13324;13325;13326;13327;13328;13329;13330;13331;13332;13333;13334;13335;13336;13337;13338;13339;13340	13327			21
YEDEINK	P04264;CON__P04264;CON__H-INV:HIT000016045;CON__P35908;CON__P35908v2;P35908;CON__P04259;CON__Q8VED5;CON__H-INV:HIT000292931;CON__ENSEMBL:ENSBTAP00000038253;CON__P02538;P02538;CON__P13647;P13647;CON__P48668;P48668;CON__Q7Z794;Q7Z794;P04259;P12035;CON__P12035;Q01546;CON__Q01546	P04264	270	276	KRT1;KRT2;KRT6A;KRT5;KRT6C;KRT77;KRT6B;KRT3;KRT76	Keratin, type II cytoskeletal 1;Keratin, type II cytoskeletal 2 epidermal;Keratin, type II cytoskeletal 6A;Keratin, type II cytoskeletal 5;Keratin, type II cytoskeletal 6C;Keratin, type II cytoskeletal 1b;Keratin, type II cytoskeletal 6B;Keratin, type II cytoskeletal 3;Keratin, type II cytoskeletal 2 oral	no	no	2	0.0074267	104.11	0	0	0	5525900	0	0		+	2161	83;29;30;20;26;82;12;31;39;7;119;261	2249	9880	13319	13319			1
IEISELNR	P04264;CON__P04264;CON__P35908;CON__P35908v2;P35908	P04264	396	403	KRT1;KRT2	Keratin, type II cytoskeletal 1;Keratin, type II cytoskeletal 2 epidermal	no	no	2	1.96e-102	178.65	0	0	0	0	0	0		+	801	83;29;30	822	3426;3427	4514;4515;4516;4517;4518;4519;4520	4514			7
FLEQQNQVLQTK	P04264;CON__P04264;CON__P35908;CON__P35908v2;P35908;CON__ENSEMBL:ENSBTAP00000038253;CON__Q7Z794;Q7Z794	P04264	200	211	KRT1;KRT2;KRT77	Keratin, type II cytoskeletal 1;Keratin, type II cytoskeletal 2 epidermal;Keratin, type II cytoskeletal 1b	no	no	2;3	9.1958e-137	187.64	942920000	465870000	391100000	638220000	115440000	135560000		+	551	83;29;30;39;7	570	2036;2037;2038;2039;2040;2041;2042;2043;2044;2045;2046;2047;2048;2049;2050;2051;2052;2053;2054;2055;2056;2057;2058;2059;2060;2061;2062;2063	2537;2538;2539;2540;2541;2542;2543;2544;2545;2546;2547;2548;2549;2550;2551;2552;2553;2554;2555;2556;2557;2558;2559;2560;2561;2562;2563;2564;2565;2566;2567;2568;2569;2570;2571;2572;2573;2574;2575;2576;2577;2578;2579;2580;2581;2582;2583;2584;2585;2586;2587;2588;2589	2573			53
YEELQITAGR	P04264;CON__P04264;P04259	P04264	377	386	KRT1;KRT6B	Keratin, type II cytoskeletal 1;Keratin, type II cytoskeletal 6B	no	no	2;3	4.3723e-230	218.06	503000000	312710000	190730000	220630000	48882000	51263000		+	2165	83;82	2253	9907;9908;9909;9910;9911;9912;9913;9914;9915;9916;9917;9918;9919;9920;9921;9922;9923;9924;9925;9926;9927;9928;9929;9930;9931;9932	13347;13348;13349;13350;13351;13352;13353;13354;13355;13356;13357;13358;13359;13360;13361;13362;13363;13364;13365;13366;13367;13368;13369;13370;13371;13372;13373;13374;13375;13376;13377;13378;13379;13380;13381;13382;13383;13384;13385;13386;13387;13388;13389;13390;13391;13392;13393;13394;13395;13396;13397;13398;13399;13400;13401;13402;13403;13404;13405;13406;13407;13408;13409;13410;13411;13412;134…	13413			72
GALQNIIPASTGAAK	P04406-2;P04406	P04406-2	159	173	GAPDH	Glyceraldehyde-3-phosphate dehydrogenase	yes	no	2	0.0030143	79.82	21197000	0	0	0	0	0			607	84	626	2309;2310	2976;2977	2976			2
IISNASCTTNCLAPLAK	P04406-2;P04406	P04406-2	104	120	GAPDH	Glyceraldehyde-3-phosphate dehydrogenase	yes	no	2;3	8.8793e-14	117.23	6693600	3580000	0	0	0	0			839	84	861	3554;3555;3556;3557;3558	4651;4652;4653;4654;4655	4653			5
LISWYDNEFGYSNR	P04406-2;P04406	P04406-2	268	281	GAPDH	Glyceraldehyde-3-phosphate dehydrogenase	yes	no	2	0.011083	61.353	1711200	0	0	0	0	0			1077	84	1106	4801;4802;4803;4804;4805	6343;6344;6345;6346;6347	6343			5
LVINGNPITIFQER	P04406-2;P04406	P04406-2	25	38	GAPDH	Glyceraldehyde-3-phosphate dehydrogenase	yes	no	2	0.028732	42.743	0	0	0	0	0	0			1232	84	1265	5723	7858	7858			1
LVINGNPITIFQERDPSK	P04406-2;P04406	P04406-2	25	42	GAPDH	Glyceraldehyde-3-phosphate dehydrogenase	yes	no	3	0.0047161	49.224	0	0	1338000	0	0	0			1233	84	1266	5724;5725;5726;5727	7859;7860;7861;7862	7859			4
VIPELNGK	P04406-2;P04406	P04406-2	178	185	GAPDH	Glyceraldehyde-3-phosphate dehydrogenase	yes	no	2	0.015514	99.919	0	0	0	0	0	0			2037	84	2118	9424;9425	12801;12802	12801			2
VPTANVSVVDLTCR	P04406-2;P04406	P04406-2	193	206	GAPDH	Glyceraldehyde-3-phosphate dehydrogenase	yes	no	2;3	8.7551e-45	142.1	13167000	11899000	12320000	0	0	0			2097	84	2183	9630;9631;9632;9633;9634;9635;9636;9637;9638;9639	13032;13033;13034;13035;13036;13037;13038;13039;13040;13041	13039			10
LTGMAFR	P04406-2;P04406;O14556	P04406-2	186	192	GAPDH;GAPDHS	Glyceraldehyde-3-phosphate dehydrogenase;Glyceraldehyde-3-phosphate dehydrogenase, testis-specific	yes	no	2	0.00013196	110.54	4422700	0	4919400	0	0	0			1215	84	1248	5679;5680;5681	7813;7814;7815	7814			3
ADISPGAFAPCVK	P04485	P04485	2	14			yes	yes	2	5.1148e-05	70.1	0	0	207340000	0	0	78608000			33	85	33	74;75;76;77	77;78;79;80	77			4
SPPLGTR	P04485	P04485	22	28			yes	yes	2	0.032633	71.715	0	0	88359000	0	0	0			1721	85	1787	8141;8142	10983;10984	10983			2
RDGVIFPK	P04485	P04485	139	146			yes	yes	2	0.037675	70.69	0	0	6768200	0	0	0			1568	85	1632	7049	9441	9441			1
DGVIFPK	P04485	P04485	140	146			yes	yes	1	0.034456	52.683	0	0	0	0	0	0			252	85	260	884;885	1080;1081	1081			1
DGVIFPKMGR	P04485	P04485	140	149			yes	yes	3	0.024677	28.204	0	0	4949800	0	0	3719100			253	85	261	886;887	1082;1083	1083			2
APTPSAPSPNAMLR	P04485	P04485	160	173			yes	yes	2;3	2.4055e-91	155.06	6018600	100400000	839310000	0	166330000	2417100000			154	85	157;158	456;457;458;459;460;461;462;463;464;465;466;467;468;469;470;471;472;473;474;475;476;477;478;479;480;481;482;483;484;485;486;487;488;489;490;491;492;493;494;495;496;497	528;529;530;531;532;533;534;535;536;537;538;539;540;541;542;543;544;545;546;547;548;549;550;551;552;553;554;555;556;557;558;559;560;561;562;563;564;565;566;567;568;569;570;571;572;573;574;575;576;577;578;579;580;581;582;583;584;585;586;587;588;589;590;591;592;593;594	581	43		64
APTPSAPSPNAMLRR	P04485	P04485	160	174			yes	yes	3	1.0387e-09	67.234	0	0	0	0	0	0			155	85	159	498;499;500	595;596;597	595			3
WTPDLGYMR	P04485	P04485	187	195			yes	yes	2	1.3742e-43	154.01	0	20880000	1154400000	0	0	547950000			2153	85	2241	9862;9863;9864;9865;9866;9867;9868;9869	13291;13292;13293;13294;13295;13296;13297;13298;13299;13300;13301;13302;13303;13304;13305;13306;13307;13308	13297			18
QCINQLFR	P04485	P04485	196	203			yes	yes	2;3	3.2141e-30	158.53	5424400	46188000	2456400000	0	18488000	419470000			1454	85	1514	6601;6602;6603;6604;6605;6606;6607;6608;6609;6610;6611;6612;6613;6614;6615	8880;8881;8882;8883;8884;8885;8886;8887;8888;8889;8890;8891;8892;8893;8894;8895;8896;8897;8898;8899;8900;8901;8902;8903;8904;8905;8906;8907;8908;8909;8910;8911;8912;8913	8882			33
DCYLMGYCR	P04485	P04485	224	232			yes	yes	2	1.5266e-09	119.89	0	0	0	0	0	0			244	85	251;252	848;849;850;851;852;853;854;855	1039;1040;1041;1042;1043;1044;1045;1046;1047;1048;1049	1048	44	0	0
FDATAEPVCK	P04485	P04485	266	275			yes	yes	2;3	7.9483e-13	124.23	11174000	122620000	4370200000	0	84592000	2342000000			515	85	533	1846;1847;1848;1849;1850;1851;1852;1853;1854;1855;1856;1857;1858;1859;1860;1861;1862;1863;1864	2222;2223;2224;2225;2226;2227;2228;2229;2230;2231;2232;2233;2234;2235;2236;2237;2238;2239;2240;2241;2242;2243;2244;2245;2246;2247;2248;2249;2250;2251;2252;2253;2254;2255;2256;2257;2258;2259;2260;2261;2262;2263;2264;2265;2266;2267;2268	2260			44
LEDEFGEFDWTPQEGSQPWLSAVVADTSSVERPGPSDSGAGR	P04485	P04485	348	389			yes	yes	4	5.8842e-87	113.38	0	0	48289000	0	0	0			1027	85	1056	4426;4427	5827;5828	5827			2
FSTACPYPCSDTFLR	P04485	P04485	405	419			yes	yes	2;3	2.3687e-78	155.48	0	0	53867000	0	0	38153000			581	85	600	2220;2221;2222;2223;2224;2225	2876;2877;2878;2879;2880;2881	2879			6
FSTACPYPCSDTFLRP	P04485	P04485	405	420			yes	yes	2;3	3.0548e-53	182.35	0	53852000	2762000000	0	4169000	489380000			582	85	601	2226;2227;2228;2229;2230;2231;2232;2233;2234;2235;2236;2237;2238;2239;2240	2882;2883;2884;2885;2886;2887;2888;2889;2890;2891;2892;2893;2894;2895;2896;2897;2898;2899;2900;2901;2902	2887			21
LFDQAFGLPR	P04792	P04792	28	37	HSPB1	Heat shock protein beta-1	yes	yes	2	0.0047442	72.485	0	0	0	0	0	0			1044	86	1073	4474	5890	5890			1
AVAGDASESALLK	P05023-3;P05023-4;P05023;P05023-2	P05023-3	415	427	ATP1A1	Sodium/potassium-transporting ATPase subunit alpha-1	yes	no	2	0.0022395	65.5	0	0	0	0	0	0			197	87	202	661;662;663	804;805;806	804			3
SPDFTNENPLETR	P05023-3;P05023-4;P05023;P05023-2	P05023-3	197	209	ATP1A1	Sodium/potassium-transporting ATPase subunit alpha-1	yes	no	2	1.1431e-05	80.596	0	0	0	0	0	0			1717	87	1783	8129;8130;8131;8132;8133	10971;10972;10973;10974;10975	10974			4
LNIPVSQVNPR	P05023-3;P05023-4;P05023;P13637;P13637-2;P13637-3	P05023-3	617	627	ATP1A1;ATP1A3	Sodium/potassium-transporting ATPase subunit alpha-1;Sodium/potassium-transporting ATPase subunit alpha-3	yes	no	2	0.00087196	72.879	0	0	0	0	0	0			1149	87	1181	5171;5172;5173	6933;6934;6935	6935			3
VDNSSLTGESEPQTR	P05023-3;P05023-4;P05023;P13637;P13637-2;P13637-3;P05023-2;P50993;P20648	P05023-3	182	196	ATP1A1;ATP1A3;ATP1A2;ATP4A	Sodium/potassium-transporting ATPase subunit alpha-1;Sodium/potassium-transporting ATPase subunit alpha-3;Sodium/potassium-transporting ATPase subunit alpha-2;Potassium-transporting ATPase alpha chain 1	yes	no	2	0.013105	53.252	0	0	0	0	0	0			1978	87	2059	9290	12659	12659			1
VIMVTGDHPITAK	P05023-3;P05023-4;P05023;P13637;P13637-2;P13637-3;P05023-2;P50993;Q13733;P20648;P54707;P54707-2	P05023-3	582	594	ATP1A1;ATP1A3;ATP1A2;ATP1A4;ATP4A;ATP12A	Sodium/potassium-transporting ATPase subunit alpha-1;Sodium/potassium-transporting ATPase subunit alpha-3;Sodium/potassium-transporting ATPase subunit alpha-2;Sodium/potassium-transporting ATPase subunit alpha-4;Potassium-transporting ATPase alpha chain 1;Potassium-transporting ATPase alpha chain 2	yes	no	3	0.0014159	51.211	0	0	0	0	0	0			2033	87	2114	9417;9418;9419	12794;12795;12796	12795			3
GVGIISEGNETVEDIAAR	P05023-3;P05023-4;P05023;P13637;P13637-2;P13637-3;P50993	P05023-3	599	616	ATP1A1;ATP1A3;ATP1A2	Sodium/potassium-transporting ATPase subunit alpha-1;Sodium/potassium-transporting ATPase subunit alpha-3;Sodium/potassium-transporting ATPase subunit alpha-2	yes	no	2;3	3.1489e-09	89.959	0	0	0	0	0	0			735	87	756	2823;2824	3624;3625	3624			2
LIIVEGCQR	P05023-3;P05023-4;P05023;P13637;P13637-2;P13637-3;P50993;Q13733;P54707;P54707-2	P05023-3	668	676	ATP1A1;ATP1A3;ATP1A2;ATP1A4;ATP12A	Sodium/potassium-transporting ATPase subunit alpha-1;Sodium/potassium-transporting ATPase subunit alpha-3;Sodium/potassium-transporting ATPase subunit alpha-2;Sodium/potassium-transporting ATPase subunit alpha-4;Potassium-transporting ATPase alpha chain 2	yes	no	2	0.031298	54.157	0	0	0	0	0	0			1074	87	1103	4797;4798	6339;6340	6340			2
TPEEVTR	P05089;P05089-2	P05089	285	291	ARG1	Arginase-1	yes	no	2	0.029874	60.76	0	0	0	0	0	0			1888	88	1960	8820	11912	11912			1
VMEETLSYLLGR	P05089;P05089-2	P05089	211	222	ARG1	Arginase-1	yes	no	2	0.0023753	72.643	0	0	0	0	0	0			2084	88	2167;2168	9563;9564;9565;9566	12959;12960;12961;12962	12959	45		4
YFSMTEVDR	P05089;P05089-2	P05089	197	205	ARG1	Arginase-1	yes	no	2	0.028223	58.981	0	0	0	0	0	0			2182	88	2270	10021	13544	13544			1
GGVEEGPTVLR	P05089;P05089-2;P05089-3	P05089	22	32	ARG1	Arginase-1	yes	no	2	0.00039116	87.308	0	1451900	1295800	1456400	0	0			658	88	677	2535;2536;2537;2538;2539;2540;2541	3260;3261;3262;3263;3264;3265;3266	3265			7
GGVEEGPTVLRK	P05089;P05089-2;P05089-3	P05089	22	33	ARG1	Arginase-1	yes	no	3	0.011971	30.004	0	0	0	0	0	0			659	88	678	2542;2543	3267;3268	3267			2
VLNQELR	P05090	P05090	76	82	APOD	Apolipoprotein D	yes	yes	2	3.2701e-08	117.7	0	0	0	0	0	0			2068	89	2150	9530	12923	12923			1
LLETECPQYIR	P05109	P05109	37	47	S100A8	Protein S100-A8;Protein S100-A8, N-terminally processed	yes	yes	2	1.4834e-28	137	0	0	0	953900	0	0			1113	90	1142	5024;5025;5026;5027	6756;6757;6758;6759	6759			4
LGHPDTLNQGEFK	P06702	P06702	26	38	S100A9	Protein S100-A9	yes	yes	3	5.0793e-06	63.727	0	0	5433500	0	0	0			1057	91	1086	4746;4747;4748;4749;4750;4751;4752	6283;6284;6285;6286;6287;6288;6289	6285			7
NIETIINTFHQYSVK	P06702	P06702	11	25	S100A9	Protein S100-A9	yes	yes	3	0.002661	52.823	0	0	0	0	0	0			1339	91	1392	6128;6129	8345;8346	8346			2
VIEHIMEDLDTNADK	P06702	P06702	58	72	S100A9	Protein S100-A9	yes	yes	3	0.0038628	44.601	0	0	0	0	0	0			2024	91	2105	9401	12778	12778	46		1
LNVTEQEK	P06733	P06733	82	89	ENO1	Alpha-enolase	yes	yes	2	0.025489	79.469	0	1091400	0	0	0	0			1156	92	1188	5187	6949	6949			1
IGAEVYHNLK	P06733;P06733-2	P06733	184	193	ENO1	Alpha-enolase	yes	no	3	0.0044234	44.203	5380300	4242000	5624600	0	0	0			811	92	832	3450;3451;3452;3453;3454	4545;4546;4547;4548;4549	4549			5
YISPDQLADLYK	P06733;P06733-2	P06733	270	281	ENO1	Alpha-enolase	yes	no	2	1.1301e-06	102.06	4965100	0	0	0	0	0			2200	92	2289	10102;10103;10104	13650;13651;13652	13652			3
AKPLTDQEK	P06737-2;P06737	P06737-2	2	10	PYGL	Glycogen phosphorylase, liver form	yes	no	2	0.0019939	61.679	0	0	0	0	0	0			100	93	101	287	318	318			1
AKPLTDQEKR	P06737-2;P06737	P06737-2	2	11	PYGL	Glycogen phosphorylase, liver form	yes	no	3	0.0020633	51.092	0	0	0	0	0	0			101	93	102	288;289;290	319;320;321	321			3
APNDFNLR	P06737-2;P06737	P06737-2	215	222	PYGL	Glycogen phosphorylase, liver form	yes	no	2	0.0025499	64.757	0	0	0	0	0	0			148	93	151	431	497	497			1
FSQFLETEYK	P06737-2;P06737	P06737-2	512	521	PYGL	Glycogen phosphorylase, liver form	yes	no	2	0.0077581	67.993	0	0	0	0	0	0			577	93	596	2164	2767	2767			1
GIVGVENVAELKK	P06737-2;P06737	P06737-2	18	30	PYGL	Glycogen phosphorylase, liver form	yes	no	3	2.0239e-05	71.241	0	0	0	0	0	0			672	93	691	2564	3289	3289			1
IDDVAALDKK	P06737-2;P06737	P06737-2	682	691	PYGL	Glycogen phosphorylase, liver form	yes	no	3	0.015216	30.889	0	0	0	0	0	0			789	93	810	3393;3394	4474;4475	4474			2
INPSSMFDVQVK	P06737-2;P06737	P06737-2	524	535	PYGL	Glycogen phosphorylase, liver form	yes	no	2	0.0049894	61.353	0	0	0	0	0	0			877	93	903	3828	5011	5011			1
LVIDQIDNGFFSPK	P06737-2;P06737	P06737-2	707	720	PYGL	Glycogen phosphorylase, liver form	yes	no	2	0.0010261	67.776	0	0	0	0	0	0			1231	93	1264	5722	7857	7857			1
MSLIEEEGSKR	P06737-2;P06737	P06737-2	395	405	PYGL	Glycogen phosphorylase, liver form	yes	no	3	0.012527	29.299	0	0	0	0	0	0			1293	93	1337	5937	8108	8108			0
TFAYTNHTVLPEALER	P06737-2;P06737	P06737-2	338	353	PYGL	Glycogen phosphorylase, liver form	yes	no	3	0.0036494	53.328	0	0	0	0	0	0			1820	93	1889	8555	11546	11546			1
VIPATDLSEQISTAGTEASGTGNMK	P06737-2;P06737	P06737-2	623	647	PYGL	Glycogen phosphorylase, liver form	yes	no	3	2.6588e-05	45.972	0	0	0	0	0	0			2036	93	2117	9423	12800	12800			1
YEYGIFNQK	P06737-2;P06737	P06737-2	128	136	PYGL	Glycogen phosphorylase, liver form	yes	no	2	0.0012228	74.415	0	0	0	0	0	0			2180	93	2268	10014	13536	13536			0
DYYFALAHTVR	P06737-2;P06737;P11217-2;P11217	P06737-2	51	61	PYGL;PYGM	Glycogen phosphorylase, liver form;Glycogen phosphorylase, muscle form	yes	no	3	0.013574	38.634	0	0	0	0	0	0			334	93	346	1164	1389	1389			1
NLAENISR	P06737-2;P06737;P11217-2;P11217	P06737-2	237	244	PYGL;PYGM	Glycogen phosphorylase, liver form;Glycogen phosphorylase, muscle form	no	no	2	0.025156	80.229	0	0	0	0	0	0			1353	93	1407	6235;6236	8474;8475	8475			2
VIFLENYR	P06737-2;P06737;P11217-2;P11217	P06737-2	609	616	PYGL;PYGM	Glycogen phosphorylase, liver form;Glycogen phosphorylase, muscle form	no	no	2	0.023573	93.262	0	0	0	0	0	0			2025	93	2106	9402	12779	12779			1
VLYPNDNFFEGK	P06737-2;P06737;P11217-2;P11217	P06737-2	245	256	PYGL;PYGM	Glycogen phosphorylase, liver form;Glycogen phosphorylase, muscle form	no	no	2	0.00026645	74.162	0	0	0	0	0	0			2083	93	2166	9559;9560;9561;9562	12955;12956;12957;12958	12955			4
GPSSVEDIKAK	P06748-3;P06748-2;P06748	P06748-3	240	250	NPM1	Nucleophosmin	yes	no	3	0.0032612	38.402	0	0	0	0	0	0			697	94	716	2629	3355	3355			1
IVADKDYSVTANSK	P07195	P07195	78	91	LDHB	L-lactate dehydrogenase B chain	yes	yes	3	0.00017666	59.248	0	0	0	0	0	0			923	95	949	3997;3998	5267;5268	5267			2
TENSTSAPAAKPK	P07305	P07305	2	14	H1F0	Histone H1.0;Histone H1.0, N-terminally processed	yes	yes	2	4.3623e-08	97.456	5982200	2486800	4508900	0	0	0			1817	96	1885	8547;8548;8549	11538;11539;11540	11538			3
GVGASGSFR	P07305;P07305-2	P07305	86	94	H1F0	Histone H1.0;Histone H1.0, N-terminally processed	yes	no	2	0.030434	57.177	0	0	0	0	0	0			734	96	755	2822	3623	3623			1
VGENADSQIK	P07305;P07305-2	P07305	60	69	H1F0	Histone H1.0;Histone H1.0, N-terminally processed	yes	no	2	1.0123e-05	65.305	7789700	3540400	5209500	0	0	0			2011	96	2092	9370;9371;9372;9373	12747;12748;12749;12750	12749			3
YSDMIVAAIQAEK	P07305;P07305-2	P07305	28	40	H1F0	Histone H1.0;Histone H1.0, N-terminally processed	yes	no	2	0.012625	40.589	0	0	0	0	0	0			2223	96	2313	10220	13792	13792	47		1
FDGILGMAYPR	P07339	P07339	195	205	CTSD	Cathepsin D;Cathepsin D light chain;Cathepsin D heavy chain	yes	yes	2	0.00041355	80.165	0	0	0	0	0	0			518	97	536	1870	2275	2275			1
STVHEILCK	P07355;A6NMY6	P07355	2	10	ANXA2;ANXA2P2	Annexin A2;Putative annexin A2-like protein	yes	no	2	0.012486	43.246	0	1021400	0	0	0	0			1772	98	1840	8369	11333	11333			1
QDIAFAYQR	P07355;P07355-2	P07355	69	77	ANXA2	Annexin A2	yes	no	2	0.0093464	80.229	0	0	0	0	0	0			1456	98	1516	6617;6618;6619;6620;6621	8915;8916;8917;8918;8919	8915			5
RAEDGSVIDYELIDQDAR	P07355;P07355-2	P07355	179	196	ANXA2	Annexin A2	yes	no	3	6.2484e-07	69.737	0	0	0	0	0	0			1563	98	1627	7033;7034	9424;9425	9425			2
SLYYYIQQDTK	P07355;P07355-2;A6NMY6	P07355	314	324	ANXA2;ANXA2P2	Annexin A2;Putative annexin A2-like protein	yes	no	2	0.0090015	52.79	0	0	0	0	0	0			1709	98	1775	8111	10953	10953			1
TPAQYDASELK	P07355;P07355-2;A6NMY6	P07355	105	115	ANXA2;ANXA2P2	Annexin A2;Putative annexin A2-like protein	yes	no	2	0.0009927	78.513	0	0	0	0	0	0			1886	98	1958	8817;8818	11909;11910	11910			1
NYPATFWVNPQFK	P07384	P07384	386	398	CAPN1	Calpain-1 catalytic subunit	yes	yes	2	0.003855	61.398	0	0	0	0	0	0			1431	99	1491	6543	8820	8820			1
SEQFINLR	P07384	P07384	474	481	CAPN1	Calpain-1 catalytic subunit	yes	yes	2	0.0054204	74.415	0	0	0	0	0	0			1631	99	1697	7620;7621;7622	10256;10257;10258	10258			3
ISVYYNEATGGK	P07437	P07437	47	58	TUBB	Tubulin beta chain	yes	yes	2	0.0077874	51.927	2977100	0	3543400	0	0	0			907	100	933	3973;3974;3975;3976	5241;5242;5243;5244	5242			3
IMNTFSVVPSPK	P07437;Q13509;Q13509-2;P68371;P04350	P07437	163	174	TUBB;TUBB3;TUBB4B;TUBB4A	Tubulin beta chain;Tubulin beta-3 chain;Tubulin beta-4B chain;Tubulin beta-4A chain	no	no	2	1.1301e-06	102.06	0	3016600	6301300	0	0	0			872	100;245	898	3814;3815;3816	4997;4998;4999	4998			3
AILVDLEPGTMDSVR	P07437;Q9BVA1;Q13885;Q13509	P07437	63	77	TUBB;TUBB2B;TUBB2A;TUBB3	Tubulin beta chain;Tubulin beta-2B chain;Tubulin beta-2A chain;Tubulin beta-3 chain	yes	no	2	1.0205e-09	93.258	3422400	3183800	4714000	0	0	0			90	100	90	261;262;263;264	291;292;293;294	294			4
FPGQLNADLR	P07437;Q9BVA1;Q13885;Q13509;Q13509-2;Q3ZCM7;A6NNZ2;Q9BUF5;CON__ENSEMBL:ENSBTAP00000025008;Q9H4B7;P68371;P04350	P07437	242	251	TUBB;TUBB2B;TUBB2A;TUBB3;TUBB8;TUBB6;TUBB1;TUBB4B;TUBB4A	Tubulin beta chain;Tubulin beta-2B chain;Tubulin beta-2A chain;Tubulin beta-3 chain;Tubulin beta-8 chain;Tubulin beta-8 chain-like protein LOC260334;Tubulin beta-6 chain;Tubulin beta-1 chain;Tubulin beta-4B chain;Tubulin beta-4A chain	no	no	2	0.037713	49.418	0	0	1160900	0	0	0			562	100;245	581	2091	2619	2619			1
LAVNMVPFPR	P07437;Q9BVA1;Q13885;Q13509;Q13509-2;Q3ZCM7;A6NNZ2;Q9BUF5;CON__ENSEMBL:ENSBTAP00000025008;Q9H4B7;P68371;P04350	P07437	253	262	TUBB;TUBB2B;TUBB2A;TUBB3;TUBB8;TUBB6;TUBB1;TUBB4B;TUBB4A	Tubulin beta chain;Tubulin beta-2B chain;Tubulin beta-2A chain;Tubulin beta-3 chain;Tubulin beta-8 chain;Tubulin beta-8 chain-like protein LOC260334;Tubulin beta-6 chain;Tubulin beta-1 chain;Tubulin beta-4B chain;Tubulin beta-4A chain	no	no	2	0.0077664	67.981	2281700	1953400	4410200	0	0	0			1005	100;245	1032	4351;4352;4353;4354;4355	5743;5744;5745;5746;5747	5747			5
NSSYFVEWIPNNVK	P07437;Q9BVA1;Q13885;Q13509;Q13509-2;Q9BUF5;P68371;P04350	P07437	337	350	TUBB;TUBB2B;TUBB2A;TUBB3;TUBB6;TUBB4B;TUBB4A	Tubulin beta chain;Tubulin beta-2B chain;Tubulin beta-2A chain;Tubulin beta-3 chain;Tubulin beta-6 chain;Tubulin beta-4B chain;Tubulin beta-4A chain	no	no	2	0.001217	66.595	0	0	0	0	0	0			1409	100;245	1468	6468	8736	8736			1
IREEYPDR	P07437;Q9BVA1;Q13885;Q3ZCM7;A6NNZ2;CON__ENSEMBL:ENSBTAP00000025008;Q9H4B7;P68371	P07437	155	162	TUBB;TUBB2B;TUBB2A;TUBB8;TUBB1;TUBB4B	Tubulin beta chain;Tubulin beta-2B chain;Tubulin beta-2A chain;Tubulin beta-8 chain;Tubulin beta-8 chain-like protein LOC260334;Tubulin beta-1 chain;Tubulin beta-4B chain	no	no	3	0.0047838	77.732	1896800	1411500	2028700	0	0	0			896	100;245	922	3884;3885;3886	5111;5112;5113	5111			3
LHFFMPGFAPLTSR	P07437;Q9BVA1;Q13885;Q3ZCM7;A6NNZ2;Q9BUF5;P68371;P04350	P07437	263	276	TUBB;TUBB2B;TUBB2A;TUBB8;TUBB6;TUBB4B;TUBB4A	Tubulin beta chain;Tubulin beta-2B chain;Tubulin beta-2A chain;Tubulin beta-8 chain;Tubulin beta-8 chain-like protein LOC260334;Tubulin beta-6 chain;Tubulin beta-4B chain;Tubulin beta-4A chain	no	no	3	0.00014873	62.891	1409700	0	0	0	0	0			1067	100;245	1096	4787	6329	6329	48		1
LTVAENEAETK	P07814	P07814	1390	1400	EPRS	Bifunctional glutamate/proline--tRNA ligase;Glutamate--tRNA ligase;Proline--tRNA ligase	yes	yes	2	0.0021614	68.735	0	0	0	0	0	0			1221	101	1254	5698;5699;5700	7833;7834;7835	7834			3
NSEPAGLETPEAK	P07814	P07814	890	902	EPRS	Bifunctional glutamate/proline--tRNA ligase;Glutamate--tRNA ligase;Proline--tRNA ligase	yes	yes	2	0.014509	45.879	0	0	0	0	0	0			1401	101	1460	6446;6447	8702;8703	8702			2
SCQFVAVR	P07814	P07814	1376	1383	EPRS	Bifunctional glutamate/proline--tRNA ligase;Glutamate--tRNA ligase;Proline--tRNA ligase	yes	yes	2	0.0088208	60.294	0	0	0	0	0	0			1605	101	1669	7535	10151	10151			1
VAVQGDVVR	P07814	P07814	757	765	EPRS	Bifunctional glutamate/proline--tRNA ligase;Glutamate--tRNA ligase;Proline--tRNA ligase	yes	yes	2	2.744e-09	116.73	0	0	0	0	0	0			1969	101	2048	9249;9250	12616;12617	12617			2
ALLFVPR	P07900;P07900-2	P07900	339	345	HSP90AA1	Heat shock protein HSP 90-alpha	yes	no	2	0.019894	88.627	0	0	0	0	0	0			121	102	122	364;365	430;431	431			2
APFDLFENR	P07900;P07900-2	P07900	347	355	HSP90AA1	Heat shock protein HSP 90-alpha	yes	no	2	0.0033153	103.74	0	0	6409300	0	0	4986800			145	102	148	415;416	481;482	482			2
DNSTMGYMAAK	P07900;P07900-2	P07900	621	631	HSP90AA1	Heat shock protein HSP 90-alpha	yes	no	2	0.0020933	68.846	0	0	4335200	0	0	0			286	102	295	1003;1004;1005;1006;1007;1008	1201;1202;1203;1204;1205;1206;1207	1202			7
DQVANSAFVER	P07900;P07900-2	P07900	500	510	HSP90AA1	Heat shock protein HSP 90-alpha	yes	no	2	3.7979e-137	192.91	4463500	0	0	0	1320400	24075000			297	102	306	1028;1029;1030;1031;1032;1033;1034;1035;1036	1227;1228;1229;1230;1231;1232;1233;1234;1235;1236;1237;1238	1229			11
ELHINLIPNKQDR	P07900;P07900-2	P07900	75	87	HSP90AA1	Heat shock protein HSP 90-alpha	yes	no	4	0.0043617	44.426	0	0	1250700	0	0	0			419	102	434	1495;1496;1497	1806;1807;1808;1809;1810	1810			5
ELISNSSDALDKIR	P07900;P07900-2	P07900	47	60	HSP90AA1	Heat shock protein HSP 90-alpha	yes	no	2;3	2.7672e-71	175.86	0	0	0	0	0	0			423	102	438	1531;1532;1533;1534;1535;1536;1537;1538;1539	1845;1846;1847;1848;1849;1850;1851;1852;1853	1853			9
FYEQFSK	P07900;P07900-2	P07900	437	443	HSP90AA1	Heat shock protein HSP 90-alpha	yes	no	2	0.012222	97.602	0	0	0	0	0	0			598	102	617	2286;2287;2288;2289;2290	2952;2953;2954;2955;2956	2953			5
HLEINPDHSIIETLR	P07900;P07900-2	P07900	633	647	HSP90AA1	Heat shock protein HSP 90-alpha	yes	no	3	0.00050855	64.675	0	0	0	0	0	0			761	102	782	3002;3003	3887;3888;3889	3888			3
LGIHEDSQNR	P07900;P07900-2	P07900	447	456	HSP90AA1	Heat shock protein HSP 90-alpha	yes	no	3	1.941e-46	129.38	0	0	25918000	0	0	27444000			1058	102	1087	4753;4754;4755;4756;4757;4758	6290;6291;6292;6293;6294;6295;6296	6291			7
LVTSPCCIVTSTYGWTANMER	P07900;P07900-2	P07900	592	612	HSP90AA1	Heat shock protein HSP 90-alpha	yes	no	2	3.1864e-08	82.908	0	0	0	0	0	0			1247	102	1281	5778	7919	7919			1
NPDDITNEEYGEFYK	P07900;P07900-2	P07900	300	314	HSP90AA1	Heat shock protein HSP 90-alpha	yes	no	2	1.8253e-24	140.31	0	0	17514000	0	0	18203000			1384	102	1441	6370;6371;6372;6373;6374;6375	8624;8625;8626;8627;8628;8629	8626			6
RAPFDLFENR	P07900;P07900-2	P07900	346	355	HSP90AA1	Heat shock protein HSP 90-alpha	yes	no	2;3	5.5213e-05	84.213	0	0	3802300	0	0	3855400			1566	102	1630	7042;7043;7044;7045;7046	9434;9435;9436;9437;9438	9436			3
TDTGEPMGR	P07900;P07900-2	P07900	174	182	HSP90AA1	Heat shock protein HSP 90-alpha	yes	no	2	2.744e-09	116.73	0	0	5791200	0	0	7884600			1807	102	1875	8499;8500;8501;8502	11483;11484;11485;11486	11484			4
YYTSASGDEMVSLK	P07900;P07900-2	P07900	465	478	HSP90AA1	Heat shock protein HSP 90-alpha	yes	no	2	0.00043844	72.652	0	0	0	0	0	8381700			2238	102	2329	10258;10259	13832;13833	13832			2
YYTSASGDEMVSLKDYCTR	P07900;P07900-2	P07900	465	483	HSP90AA1	Heat shock protein HSP 90-alpha	yes	no	3	0.0058651	45.704	0	0	0	0	0	0			2239	102	2330	10260;10261;10262;10263;10264	13834;13835;13836;13837;13838	13836			5
ELHINLIPNK	P07900;P07900-2;Q14568	P07900	75	84	HSP90AA1;HSP90AA2P	Heat shock protein HSP 90-alpha;Heat shock protein HSP 90-alpha A2	yes	no	3	0.00064448	85.731	0	0	4024300	0	0	3240900			418	102	433	1492;1493;1494	1803;1804;1805	1804			3
ELISNSSDALDK	P07900;P07900-2;Q14568	P07900	47	58	HSP90AA1;HSP90AA2P	Heat shock protein HSP 90-alpha;Heat shock protein HSP 90-alpha A2	yes	no	2	9.3305e-07	103.26	2091600	3599300	19096000	0	1575900	20985000			422	102	437	1520;1521;1522;1523;1524;1525;1526;1527;1528;1529;1530	1834;1835;1836;1837;1838;1839;1840;1841;1842;1843;1844	1844			11
HIYYITGETK	P07900;P07900-2;Q58FG0	P07900	490	499	HSP90AA1;HSP90AA5P	Heat shock protein HSP 90-alpha;Putative heat shock protein HSP 90-alpha A5	yes	no	2;3	0.0015719	87.639	0	0	8224100	0	0	0			758	102	779	2989;2990;2991;2992;2993;2994;2995;2996;2997	3868;3869;3870;3871;3872;3873;3874;3875;3876;3877;3878	3872			11
HSQFIGYPITLFVEK	P07900;P07900-2;Q58FG0	P07900	210	224	HSP90AA1;HSP90AA5P	Heat shock protein HSP 90-alpha;Putative heat shock protein HSP 90-alpha A5	yes	no	3	0.0010244	59.261	0	0	0	0	0	0			771	102	792	3359;3360;3361	4440;4441;4442	4442			3
TLVSVTK	P07900;P07900-2;Q58FG1	P07900	540	546	HSP90AA1;HSP90AA4P	Heat shock protein HSP 90-alpha;Putative heat shock protein HSP 90-alpha A4	yes	no	2	0.033401	72.138	0	0	0	0	0	0			1866	102	1936	8728;8729;8730	11780;11781;11782;11783	11782			4
GFAFVQYVNER	P07910-4;P07910-2;P07910	P07910-4	51	61	HNRNPC	Heterogeneous nuclear ribonucleoproteins C1/C2	yes	no	2	0.00086428	85.731	0	0	0	0	0	0			629	103	648	2370;2371;2372	3041;3042;3043	3042			3
MIAGQVLDINLAAEPK	P07910-4;P07910-2;P07910	P07910-4	74	89	HNRNPC	Heterogeneous nuclear ribonucleoproteins C1/C2	yes	no	2	0.004419	76.533	0	0	0	0	0	0			1272	103	1309	5833	7978	7978	49		1
ASNVTNKTDPR	P07910-4;P07910-2;P07910;P07910-3	P07910-4	2	12	HNRNPC	Heterogeneous nuclear ribonucleoproteins C1/C2	yes	no	2	0.00025482	80.239	0	0	0	0	0	0			182	103	187	625	765	765			1
VPPPPPIAR	P07910-4;P07910-2;P07910;P07910-3	P07910-4	130	138	HNRNPC	Heterogeneous nuclear ribonucleoproteins C1/C2	yes	no	2	0.009693	81.635	0	0	1848400	0	0	0			2095	103	2181	9606;9607;9608	13002;13003;13004;13005;13006	13005			5
VFIGNLNTLVVK	P07910-4;P07910-2;P07910;P07910-3;P0DMR1;O60812;B7ZW38;B2RXH8	P07910-4	18	29	HNRNPC;HNRNPCL4;HNRNPCL1;HNRNPCL3;HNRNPCL2	Heterogeneous nuclear ribonucleoproteins C1/C2;Heterogeneous nuclear ribonucleoprotein C-like 4;Heterogeneous nuclear ribonucleoprotein C-like 1;Heterogeneous nuclear ribonucleoprotein C-like 3;Heterogeneous nuclear ribonucleoprotein C-like 2	yes	no	2	0.00016817	81.338	0	0	0	0	0	0			1997	103	2078	9334	12710;12711	12710			2
ADLLLSTQPGREEGSPLELER	P08195-2;P08195-3;P08195;P08195-4	P08195-2	492	512	SLC3A2	4F2 cell-surface antigen heavy chain	yes	no	3	3.7492e-44	120.11	0	0	0	0	0	0			39	104	39	93;94	98;99	98			2
EDFDSLLQSAK	P08195-2;P08195-3;P08195;P08195-4	P08195-2	187	197	SLC3A2	4F2 cell-surface antigen heavy chain	yes	no	2	0.025772	45.161	0	0	0	0	0	0			356	104	368	1252	1500	1500			1
GENSWFSTQVDTVATK	P08195-2;P08195-3;P08195;P08195-4	P08195-2	213	228	SLC3A2	4F2 cell-surface antigen heavy chain	yes	no	2	0.023333	52.555	0	0	0	0	0	0			624	104	643	2359	3030	3030			1
IGDLQAFQGHGAGNLAGLK	P08195-2;P08195-3;P08195;P08195-4	P08195-2	126	144	SLC3A2	4F2 cell-surface antigen heavy chain	yes	no	3	0.00011006	65.231	0	0	0	0	0	0			813	104	834	3459;3460	4554;4555	4555			2
VAEDEAEAAAAAK	P08195-2;P08195-3;P08195;P08195-4	P08195-2	47	59	SLC3A2	4F2 cell-surface antigen heavy chain	yes	no	2	0.0042061	60.434	0	0	0	0	0	0			1957	104	2036	9076;9077;9078;9079	12198;12199;12200;12201	12198			4
VILDLTPNYR	P08195-2;P08195-3;P08195;P08195-4	P08195-2	203	212	SLC3A2	4F2 cell-surface antigen heavy chain	yes	no	2	5.4563e-05	107.66	0	0	0	0	0	0			2029	104	2110	9408;9409;9410	12785;12786;12787	12787			3
IMEIVDAITTTAQSHQR	P08237-2;P08237;P08237-3	P08237-2	185	201	PFKM	ATP-dependent 6-phosphofructokinase, muscle type	yes	no	3	0.0059299	49.993	0	0	0	0	0	0			868	105	894	3807	4990	4990			1
ADHGEPIGR	P08238	P08238	169	177	HSP90AB1	Heat shock protein HSP 90-beta	yes	yes	2	1.3163e-22	133.12	0	0	1743300	0	0	3202500			31	106	31	67;68;69;70;71	70;71;72;73;74	71			5
ALLFIPR	P08238	P08238	331	337	HSP90AB1	Heat shock protein HSP 90-beta	yes	yes	2	0.012046	98.03	0	0	0	0	0	0			120	106	121	361;362;363	427;428;429	429			3
CLELFSELAEDKENYK	P08238	P08238	412	427	HSP90AB1	Heat shock protein HSP 90-beta	yes	yes	3	0.027871	34.277	0	0	0	0	0	0			223	106	229	745	908	908			1
GFEVVYMTEPIDEYCVQQLK	P08238	P08238	507	526	HSP90AB1	Heat shock protein HSP 90-beta	yes	yes	3	0.021409	22.874	0	0	0	0	0	0			630	106	649	2373	3044	3044			1
HLEINPDHPIVETLR	P08238	P08238	625	639	HSP90AB1	Heat shock protein HSP 90-beta	yes	yes	3	1.8066e-65	134.88	0	0	0	0	0	0			760	106	781	2999;3000;3001	3880;3881;3882;3883;3884;3885;3886	3882			7
LGIHEDSTNR	P08238	P08238	439	448	HSP90AB1	Heat shock protein HSP 90-beta	yes	yes	2;3	0.00023713	98.048	7067900	0	29928000	0	2109000	0			1059	106	1088	4759;4760;4761;4762;4763;4764;4765;4766;4767;4768	6297;6298;6299;6300;6301;6302;6303;6304;6305;6306;6307;6308;6309;6310	6298			14
LVSSPCCIVTSTYGWTANMER	P08238	P08238	584	604	HSP90AB1	Heat shock protein HSP 90-beta	yes	yes	3	0.0026685	44.105	0	0	0	0	0	0			1244	106	1277	5766	7907	7907			1
NPDDITQEEYGEFYK	P08238	P08238	292	306	HSP90AB1	Heat shock protein HSP 90-beta	yes	yes	2;3	4.248e-52	146.16	0	4603200	25061000	0	0	0			1385	106	1442	6376;6377;6378;6379;6380;6381;6382;6383;6384	8630;8631;8632;8633;8634;8635;8636;8637;8638;8639;8640	8638			11
SIYYITGESKEQVANSAFVER	P08238	P08238	482	502	HSP90AB1	Heat shock protein HSP 90-beta	yes	yes	3	4.1597e-07	76.027	0	0	0	0	0	0			1671	106	1737	7856;7857;7858	10542;10543;10544;10545;10546	10542			5
TLTLVDTGIGMTK	P08238	P08238	83	95	HSP90AB1	Heat shock protein HSP 90-beta	yes	yes	2;3	3.4385e-105	178.08	3352500	4730900	57891000	0	1914100	43449000			1865	106	1935	8708;8709;8710;8711;8712;8713;8714;8715;8716;8717;8718;8719;8720;8721;8722;8723;8724;8725;8726;8727	11759;11760;11761;11762;11763;11764;11765;11766;11767;11768;11769;11770;11771;11772;11773;11774;11775;11776;11777;11778;11779	11779			21
YHTSQSGDEMTSLSEYVSR	P08238	P08238	457	475	HSP90AB1	Heat shock protein HSP 90-beta	yes	yes	2;3	1.8135e-136	171.71	0	2844600	20462000	0	0	21352000			2192	106	2280;2281	10037;10038;10039;10040;10041;10042;10043;10044;10045;10046;10047;10048;10049;10050;10051;10052	13560;13561;13562;13563;13564;13565;13566;13567;13568;13569;13570;13571;13572;13573;13574;13575;13576;13577;13578;13579;13580	13566	50		21
GVVDSEDLPLNISR	P08238;P07900;P07900-2	P08238	379	392	HSP90AB1;HSP90AA1	Heat shock protein HSP 90-beta;Heat shock protein HSP 90-alpha	no	no	2;3	4.2561e-71	158.05	10224000	21332000	87529000	0	0	103590000			742	106;102	763	2835;2836;2837;2838;2839;2840;2841;2842;2843;2844;2845;2846	3636;3637;3638;3639;3640;3641;3642;3643;3644;3645;3646;3647;3648;3649;3650;3651	3636			16
SLTNDWEDHLAVK	P08238;P07900;P07900-2	P08238	307	319	HSP90AB1;HSP90AA1	Heat shock protein HSP 90-beta;Heat shock protein HSP 90-alpha	no	no	2;3	5.0488e-07	92.866	0	0	25954000	0	0	32502000			1697	106;102	1763	8049;8050;8051;8052;8053;8054;8055;8056;8057;8058	10885;10886;10887;10888;10889;10890;10891;10892;10893;10894	10894			10
ADLINNLGTIAK	P08238;P07900;P07900-2;Q14568;Q58FF8	P08238	96	107	HSP90AB1;HSP90AA1;HSP90AA2P;HSP90AB2P	Heat shock protein HSP 90-beta;Heat shock protein HSP 90-alpha;Heat shock protein HSP 90-alpha A2;Putative heat shock protein HSP 90-beta 2	no	no	2	5.5255e-23	132.01	0	0	77885000	0	0	54018000			38	106;102;317	38	85;86;87;88;89;90;91;92	88;89;90;91;92;93;94;95;96;97	96			10
EKYIDQEELNK	P08238;P07900;P07900-2;Q14568;Q58FF8	P08238	274	284	HSP90AB1;HSP90AA1;HSP90AA2P;HSP90AB2P	Heat shock protein HSP 90-beta;Heat shock protein HSP 90-alpha;Heat shock protein HSP 90-alpha A2;Putative heat shock protein HSP 90-beta 2	no	no	3	0.0004927	53.567	0	0	0	0	0	0			403	106;102;317	417	1444;1445;1446;1447	1749;1750;1751;1752	1749			4
YIDQEELNK	P08238;P07900;P07900-2;Q14568;Q58FF8	P08238	276	284	HSP90AB1;HSP90AA1;HSP90AA2P;HSP90AB2P	Heat shock protein HSP 90-beta;Heat shock protein HSP 90-alpha;Heat shock protein HSP 90-alpha A2;Putative heat shock protein HSP 90-beta 2	no	no	2	1.8167e-09	119.29	0	0	55244000	0	0	0			2195	106;102;317	2284	10083;10084;10085;10086;10087;10088	13625;13626;13627;13628;13629;13630;13631;13632;13633;13634	13631			10
TKPIWTR	P08238;P07900;P07900-2;Q58FG0;Q14568;Q58FF8	P08238	285	291	HSP90AB1;HSP90AA1;HSP90AA5P;HSP90AA2P;HSP90AB2P	Heat shock protein HSP 90-beta;Heat shock protein HSP 90-alpha;Putative heat shock protein HSP 90-alpha A5;Heat shock protein HSP 90-alpha A2;Putative heat shock protein HSP 90-beta 2	no	no	2	0.02693	69.998	0	0	0	0	0	0			1847	106;102;317	1917	8642	11636	11636			1
ELISNASDALDK	P08238;P14625	P08238	42	53	HSP90AB1;HSP90B1	Heat shock protein HSP 90-beta;Endoplasmin	no	no	2	1.8741e-07	111.06	0	0	31609000	0	0	24349000			420	106;127	435	1498;1499;1500;1501;1502;1503;1504;1505;1506	1811;1812;1813;1814;1815;1816;1817;1818;1819	1814			9
ELISNASDALDKIR	P08238;P14625	P08238	42	55	HSP90AB1;HSP90B1	Heat shock protein HSP 90-beta;Endoplasmin	no	no	2;3	1.5791e-145	204.5	0	2010500	8378500	0	0	8875600			421	106;127	436	1507;1508;1509;1510;1511;1512;1513;1514;1515;1516;1517;1518;1519	1820;1821;1822;1823;1824;1825;1826;1827;1828;1829;1830;1831;1832;1833	1831			14
DNSTMGYMMAK	P08238;Q58FF7	P08238	613	623	HSP90AB1;HSP90AB3P	Heat shock protein HSP 90-beta;Putative heat shock protein HSP 90-beta-3	yes	no	2	0.0058919	57.598	0	0	0	0	0	0			287	106	296	1009;1010;1011	1208;1209;1210	1208			3
ELKIDIIPNPQER	P08238;Q58FF7	P08238	70	82	HSP90AB1;HSP90AB3P	Heat shock protein HSP 90-beta;Putative heat shock protein HSP 90-beta-3	yes	no	2;3	0.0064538	59.757	0	0	0	0	0	0			425	106	440	1541;1542	1855;1856	1856			2
EQVANSAFVER	P08238;Q58FF7	P08238	492	502	HSP90AB1;HSP90AB3P	Heat shock protein HSP 90-beta;Putative heat shock protein HSP 90-beta-3	yes	no	2	9.5308e-64	157.96	4257500	6306000	25687000	0	0	20279000			457	106	473	1644;1645;1646;1647;1648;1649;1650;1651;1652;1653	1969;1970;1971;1972;1973;1974;1975;1976;1977;1978;1979;1980;1981	1974			12
IDIIPNPQER	P08238;Q58FF7	P08238	73	82	HSP90AB1;HSP90AB3P	Heat shock protein HSP 90-beta;Putative heat shock protein HSP 90-beta-3	yes	no	2	8.7032e-07	110.87	5550400	5696200	23428000	0	0	19558000			792	106	813	3398;3399;3400;3401;3402;3403;3404;3405;3406;3407	4479;4480;4481;4482;4483;4484;4485;4486;4487;4488;4489;4490;4491;4492;4493;4494;4495	4483			17
RAPFDLFENK	P08238;Q58FF7	P08238	338	347	HSP90AB1;HSP90AB3P	Heat shock protein HSP 90-beta;Putative heat shock protein HSP 90-beta-3	yes	no	2;3	5.014e-05	108.15	0	0	1528700	0	0	1561400			1565	106	1629	7036;7037;7038;7039;7040;7041	9427;9428;9429;9430;9431;9432;9433	9427			6
EDQTEYLEERR	P08238;Q58FF7;P07900;P07900-2	P08238	187	197	HSP90AB1;HSP90AB3P;HSP90AA1	Heat shock protein HSP 90-beta;Putative heat shock protein HSP 90-beta-3;Heat shock protein HSP 90-alpha	no	no	3	0.013153	31.185	0	0	0	0	0	0			362	106;102	374	1278;1279	1527;1528	1527			2
EMLQQSK	P08238;Q58FF7;P07900;P07900-2	P08238	393	399	HSP90AB1;HSP90AB3P;HSP90AA1	Heat shock protein HSP 90-beta;Putative heat shock protein HSP 90-beta-3;Heat shock protein HSP 90-alpha	no	no	2	0.0091433	102.98	0	0	3481800	0	0	9348600			444	106;102	459	1595;1596;1597;1598	1916;1917;1918;1919	1917			4
YESLTDPSKLDSGK	P08238;Q58FF7;P07900;P07900-2;Q58FF8	P08238	56	69	HSP90AB1;HSP90AB3P;HSP90AA1;HSP90AB2P	Heat shock protein HSP 90-beta;Putative heat shock protein HSP 90-beta-3;Heat shock protein HSP 90-alpha;Putative heat shock protein HSP 90-beta 2	no	no	2;3	9.3982e-08	90.05	0	0	18261000	0	0	7643200			2175	106;102;317	2263	9994;9995;9996;9997;9998;9999;10000;10001;10002;10003	13515;13516;13517;13518;13519;13520;13521;13522;13523;13524;13525	13525			11
EGLELPEDEEEKKK	P08238;Q58FF7;P07900;P07900-2;Q58FG0	P08238	539	552	HSP90AB1;HSP90AB3P;HSP90AA1;HSP90AA5P	Heat shock protein HSP 90-beta;Putative heat shock protein HSP 90-beta-3;Heat shock protein HSP 90-alpha;Putative heat shock protein HSP 90-alpha A5	no	no	3;4	1.1056e-05	76.728	0	0	9370500	0	0	5507700			381	106;102	394	1362;1363;1364;1365;1366	1633;1634;1635;1636;1637	1634			5
EDQTEYLEER	P08238;Q58FF7;Q58FF6;P07900;P07900-2	P08238	187	196	HSP90AB1;HSP90AB3P;HSP90AB4P;HSP90AA1	Heat shock protein HSP 90-beta;Putative heat shock protein HSP 90-beta-3;Putative heat shock protein HSP 90-beta 4;Heat shock protein HSP 90-alpha	no	no	2	2.0105e-11	122.13	0	6191600	37744000	0	0	26246000			361	106;102	373	1271;1272;1273;1274;1275;1276;1277	1519;1520;1521;1522;1523;1524;1525;1526	1520			8
VILHLKEDQTEYLEER	P08238;Q58FF7;Q58FF6;P07900;P07900-2	P08238	181	196	HSP90AB1;HSP90AB3P;HSP90AB4P;HSP90AA1	Heat shock protein HSP 90-beta;Putative heat shock protein HSP 90-beta-3;Putative heat shock protein HSP 90-beta 4;Heat shock protein HSP 90-alpha	no	no	4	0.03119	34.612	0	0	0	0	0	0			2032	106;102	2113	9416	12793	12793			1
YESLTDPSK	P08238;Q58FF7;Q58FF6;P07900;P07900-2;Q58FF8	P08238	56	64	HSP90AB1;HSP90AB3P;HSP90AB4P;HSP90AA1;HSP90AB2P	Heat shock protein HSP 90-beta;Putative heat shock protein HSP 90-beta-3;Putative heat shock protein HSP 90-beta 4;Heat shock protein HSP 90-alpha;Putative heat shock protein HSP 90-beta 2	no	no	2	0.0099061	85.666	0	0	19172000	0	0	13145000			2174	106;102;317	2262	9987;9988;9989;9990;9991;9992;9993	13506;13507;13508;13509;13510;13511;13512;13513;13514	13512			9
EGLELPEDEEEK	P08238;Q58FF7;Q58FF6;P07900;P07900-2;Q58FG0	P08238	539	550	HSP90AB1;HSP90AB3P;HSP90AB4P;HSP90AA1;HSP90AA5P	Heat shock protein HSP 90-beta;Putative heat shock protein HSP 90-beta-3;Putative heat shock protein HSP 90-beta 4;Heat shock protein HSP 90-alpha;Putative heat shock protein HSP 90-alpha A5	no	no	2	0.00010562	72.006	0	0	0	0	0	0			379	106;102	392	1357;1358;1359	1628;1629;1630	1628			1
EGLELPEDEEEKK	P08238;Q58FF7;Q58FF6;P07900;P07900-2;Q58FG0	P08238	539	551	HSP90AB1;HSP90AB3P;HSP90AB4P;HSP90AA1;HSP90AA5P	Heat shock protein HSP 90-beta;Putative heat shock protein HSP 90-beta-3;Putative heat shock protein HSP 90-beta 4;Heat shock protein HSP 90-alpha;Putative heat shock protein HSP 90-alpha A5	no	no	3	0.0070162	32.734	0	0	4739100	0	0	0			380	106;102	393	1360;1361	1631;1632	1631			2
SLVSVTK	P08238;Q58FF7;Q58FF8	P08238	532	538	HSP90AB1;HSP90AB3P;HSP90AB2P	Heat shock protein HSP 90-beta;Putative heat shock protein HSP 90-beta-3;Putative heat shock protein HSP 90-beta 2	no	no	1;2	0.017374	91.906	0	2805900	0	0	0	0			1702	106;317	1768	8083;8084;8085;8086;8087;8088	10922;10923;10924;10925;10926;10927;10928	10922			6
YESLTDPSKLDSGKELK	P08238;Q58FF7;Q58FF8	P08238	56	72	HSP90AB1;HSP90AB3P;HSP90AB2P	Heat shock protein HSP 90-beta;Putative heat shock protein HSP 90-beta-3;Putative heat shock protein HSP 90-beta 2	no	no	4	0.012206	23.683	0	0	0	0	0	0			2176	106;317	2264	10004	13526	13526			1
AKFENLCK	P08238;Q58FF8	P08238	558	565	HSP90AB1;HSP90AB2P	Heat shock protein HSP 90-beta;Putative heat shock protein HSP 90-beta 2	no	no	2	0.021109	79.469	0	0	0	0	0	0			99	106;317	100	285;286	315;316;317	316			3
SIYYITGESK	P08238;Q58FF8	P08238	482	491	HSP90AB1;HSP90AB2P	Heat shock protein HSP 90-beta;Putative heat shock protein HSP 90-beta 2	no	no	2	0.0028956	84.615	0	0	22315000	0	0	19878000			1670	106;317	1736	7849;7850;7851;7852;7853;7854;7855	10535;10536;10537;10538;10539;10540;10541	10541			7
FADLSEAANR	P08670	P08670	295	304	VIM	Vimentin	yes	yes	2	0.0057446	70.919	0	0	1220100	0	0	0			502	107	520	1795;1796;1797	2161;2162;2163	2162			3
ILLAELEQLK	P08670	P08670	130	139	VIM	Vimentin	yes	yes	2	0.013016	60.59	0	0	1685700	0	0	0			854	107	879	3755	4933	4933			1
LGDLYEEEMR	P08670	P08670	146	155	VIM	Vimentin	yes	yes	2	0.015981	56.563	0	0	0	0	0	0			1052	107	1081	4510	5932	5932			1
LLEGEESR	P08670	P08670	403	410	VIM	Vimentin	no	no	2	0.023606	55.676	0	0	0	0	0	0		+	1106	107	1135	5011	6743	6743			1
SLYASSPGGVYATR	P08670	P08670	51	64	VIM	Vimentin	yes	yes	2	0.0011268	67.153	0	0	0	0	0	0			1703	107	1769	8089	10929	10929			1
NQGGYGGSSSSSSYGSGR	P09651-3;P09651-2;P09651	P09651-3	248	265	HNRNPA1	Heterogeneous nuclear ribonucleoprotein A1;Heterogeneous nuclear ribonucleoprotein A1, N-terminally processed	yes	no	2	0.010634	54.524	0	0	1032000	0	0	0			1391	108	1448	6400	8656	8656			1
SESPKEPEQLR	P09651-3;P09651-2;P09651	P09651-3	4	14	HNRNPA1	Heterogeneous nuclear ribonucleoprotein A1;Heterogeneous nuclear ribonucleoprotein A1, N-terminally processed	yes	no	3	7.2902e-05	76.143	0	0	0	0	0	0			1633	108	1699	7625;7626	10261;10262	10262			2
SSGPYGGGGQYFAKPR	P09651-3;P09651-2;P09651	P09651-3	232	247	HNRNPA1	Heterogeneous nuclear ribonucleoprotein A1;Heterogeneous nuclear ribonucleoprotein A1, N-terminally processed	yes	no	3	0.01267	45.614	0	0	0	0	0	0			1748	108	1814	8252;8253	11152;11153	11153			2
AESSDKLYR	P09874	P09874	2	10	PARP1	Poly [ADP-ribose] polymerase 1	yes	yes	2	0.00016607	65.246	0	0	0	0	0	0			54	109	54	152;153	175;176	176			0
GGAAVDPDSGLEHSAHVLEK	P09874	P09874	529	548	PARP1	Poly [ADP-ribose] polymerase 1	yes	yes	3;4	6.3937e-08	79.511	0	0	6951000	0	0	0			636	109	655	2392;2393;2394;2395;2396;2397	3067;3068;3069;3070;3071;3072	3069			6
GGSDDSSKDPIDVNYEK	P09874	P09874	780	796	PARP1	Poly [ADP-ribose] polymerase 1	yes	yes	3	0.00177	56.959	0	0	0	0	0	0			651	109	670	2454;2455;2456;2457	3153;3154;3155;3156	3153			4
HPDVEVDGFSELR	P09874	P09874	66	78	PARP1	Poly [ADP-ribose] polymerase 1	yes	yes	2	0.036308	49.5	0	0	0	0	0	0			764	109	785	3036	3941	3941			1
IAPPEAPVTGYMFGK	P09874	P09874	879	893	PARP1	Poly [ADP-ribose] polymerase 1	yes	yes	2	0.0039525	61.435	0	0	0	0	0	0			782	109	803	3382	4463	4463			1
KGDEVDGVDEVAK	P09874	P09874	209	221	PARP1	Poly [ADP-ribose] polymerase 1	yes	yes	3	0.00018663	65.495	0	0	0	0	0	0			947	109	974	4060;4061;4062;4063	5337;5338;5339;5340	5338			4
KLTVNPGTK	P09874	P09874	654	662	PARP1	Poly [ADP-ribose] polymerase 1	yes	yes	2	0.012091	66.568	0	0	0	0	0	0			958	109	985	4094	5388	5388			1
KPPLLNNADSVQAK	P09874	P09874	748	761	PARP1	Poly [ADP-ribose] polymerase 1	yes	yes	2;3	6.1216e-06	77.527	0	0	4428800	0	0	0			963	109	990	4103;4104;4105;4106;4107;4108;4109	5397;5398;5399;5400;5401;5402;5403;5404	5398			8
LQLLEDDKENR	P09874	P09874	572	582	PARP1	Poly [ADP-ribose] polymerase 1	yes	yes	2;3	1.5231e-06	100.88	0	0	4405400	0	0	0			1170	109	1203	5224;5225	6992;6993	6992			2
MIFDVESMKK	P09874	P09874	675	684	PARP1	Poly [ADP-ribose] polymerase 1	yes	yes	3	0.019241	23.851	0	0	1237900	0	0	0			1275	109	1312	5837	7982	7982			1
MVDPEKPQLGMIDR	P09874	P09874	143	156	PARP1	Poly [ADP-ribose] polymerase 1	yes	yes	3	0.0042615	44.511	0	0	2964400	0	0	0			1301	109	1350	5985;5986;5987	8161;8162;8163	8163			3
QQVPSGESAILDR	P09874	P09874	270	282	PARP1	Poly [ADP-ribose] polymerase 1	yes	yes	2	0.0039226	67.334	0	0	4514200	0	0	0			1530	109	1593	6869;6870;6871;6872;6873	9213;9214;9215;9216;9217	9217			5
SDAYYCTGDVTAWTK	P09874	P09874	306	320	PARP1	Poly [ADP-ribose] polymerase 1	yes	yes	2	0.0030522	62.924	0	0	0	0	0	0			1608	109	1672	7546	10162	10162			1
TAEAGGVTGKGQDGIGSK	P09874	P09874	88	105	PARP1	Poly [ADP-ribose] polymerase 1	yes	yes	3	0.019821	30.684	0	0	0	0	0	0			1791	109	1859	8440	11421	11421			1
TLGDFAAEYAK	P09874	P09874	109	119	PARP1	Poly [ADP-ribose] polymerase 1	yes	yes	2	0.0075956	53.751	0	0	5939000	0	0	0			1853	109	1923	8658;8659	11653;11654	11653			2
TTNFAGILSQGLR	P09874	P09874	866	878	PARP1	Poly [ADP-ribose] polymerase 1	yes	yes	2	3.0516e-10	104.52	0	0	4984100	0	0	3207300			1923	109	1998	8952;8953;8954;8955;8956	12064;12065;12066;12067;12068	12066			5
VFSATLGLVDIVK	P09874	P09874	552	564	PARP1	Poly [ADP-ribose] polymerase 1	yes	yes	2	0.0049577	58.37	0	0	0	0	0	0			2002	109	2083	9345	12722	12722			1
VGTVIGSNK	P09874	P09874	592	600	PARP1	Poly [ADP-ribose] polymerase 1	yes	yes	2	0.0075574	82.279	0	0	2062000	0	0	0			2020	109	2101	9392;9393;9394	12769;12770;12771	12771			3
VVDRDSEEAEIIR	P09874	P09874	803	815	PARP1	Poly [ADP-ribose] polymerase 1	yes	yes	3	0.00029997	67.115	0	0	0	0	0	0			2135	109	2223	9795;9796;9797;9798	13218;13219;13220;13221;13222	13221			5
VVDRDSEEAEIIRK	P09874	P09874	803	816	PARP1	Poly [ADP-ribose] polymerase 1	yes	yes	3;4	0.0068928	35.891	0	0	0	0	0	0			2136	109	2224	9799;9800	13223;13224	13223			2
VVSEDFLQDVSASTK	P09874	P09874	453	467	PARP1	Poly [ADP-ribose] polymerase 1	yes	yes	2	6.7401e-12	96.103	0	0	6019100	0	0	8827400			2142	109	2230	9813;9814;9815;9816;9817;9818;9819	13237;13238;13239;13240;13241;13242;13243	13238			7
SYSCQVTHEGSTVEK	P0CG06;P0CG05;P0CG04;P0CF74;B9A064	P0CG06	84	98	IGLC3;IGLC2;IGLC1;IGLC6;IGLL5	Ig lambda-3 chain C regions;Ig lambda-2 chain C regions;Ig lambda-1 chain C regions;Ig lambda-6 chain C region;Immunoglobulin lambda-like polypeptide 5	yes	no	3	0.00073695	55.885	0	0	0	0	0	0			1785	3	1853	8400	11365	11365			1
VQVSYKGETK	P0DMV9;P0DMV8	P0DMV9	103	112	HSPA1B;HSPA1A	Heat shock 70 kDa protein 1B;Heat shock 70 kDa protein 1A	yes	no	2	0.036977	56.258	0	0	0	0	0	0			2110	110	2196	9683	13095	13095			1
AQIHDLVLVGGSTR	P0DMV9;P0DMV8;P0DMV8-2	P0DMV9	329	342	HSPA1B;HSPA1A	Heat shock 70 kDa protein 1B;Heat shock 70 kDa protein 1A	yes	no	2;3	0.0052159	57.175	0	0	12788000	0	0	17295000			163	110	167	529;530;531;532;533	637;638;639;640;641	639			5
DAGVIAGLNVLR	P0DMV9;P0DMV8;P0DMV8-2	P0DMV9	160	171	HSPA1B;HSPA1A	Heat shock 70 kDa protein 1B;Heat shock 70 kDa protein 1A	no	no	2	1.5543e-09	110.87	3247400	2369900	17884000	0	0	15737000			238	110	245	794;795;796;797;798;799;800	974;975;976;977;978;979;980	978			7
FGDPVVQSDMK	P0DMV9;P0DMV8;P0DMV8-2	P0DMV9	78	88	HSPA1B;HSPA1A	Heat shock 70 kDa protein 1B;Heat shock 70 kDa protein 1A	yes	no	2	0.0046632	71.349	0	0	6397300	0	0	6945300			531	110	550	1945;1946;1947;1948	2354;2355;2356;2357	2354			4
KFGDPVVQSDMK	P0DMV9;P0DMV8;P0DMV8-2	P0DMV9	77	88	HSPA1B;HSPA1A	Heat shock 70 kDa protein 1B;Heat shock 70 kDa protein 1A	yes	no	3	0.00076064	49.423	0	0	0	0	0	3301400			946	110	973	4057;4058;4059	5334;5335;5336	5335			3
LLQDFFNGR	P0DMV9;P0DMV8;P0DMV8-2	P0DMV9	349	357	HSPA1B;HSPA1A	Heat shock 70 kDa protein 1B;Heat shock 70 kDa protein 1A	yes	no	2	0.0058858	100.45	0	1317700	8026800	0	0	6795900			1127	110	1157	5068;5069;5070;5071;5072	6800;6801;6802;6803;6804	6802			5
LSKEEIER	P0DMV9;P0DMV8;P0DMV8-2	P0DMV9	510	517	HSPA1B;HSPA1A	Heat shock 70 kDa protein 1B;Heat shock 70 kDa protein 1A	no	no	2	0.021169	73.26	0	0	0	0	0	0			1193	110	1226	5317	7131	7131			1
NALESYAFNMK	P0DMV9;P0DMV8;P0DMV8-2	P0DMV9	540	550	HSPA1B;HSPA1A	Heat shock 70 kDa protein 1B;Heat shock 70 kDa protein 1A	no	no	2	5.4893e-20	126.41	0	0	0	0	0	9597900			1309	110	1359	6004;6005;6006	8180;8181;8182	8181			3
NQVALNPQNTVFDAK	P0DMV9;P0DMV8;P0DMV8-2	P0DMV9	57	71	HSPA1B;HSPA1A	Heat shock 70 kDa protein 1B;Heat shock 70 kDa protein 1A	yes	no	2;3	7.6709e-12	95.401	1990200	2579600	16332000	0	0	14895000			1396	110	1453	6419;6420;6421;6422;6423;6424;6425;6426;6427;6428	8675;8676;8677;8678;8679;8680;8681;8682;8683;8684	8678			10
NQVALNPQNTVFDAKR	P0DMV9;P0DMV8;P0DMV8-2	P0DMV9	57	72	HSPA1B;HSPA1A	Heat shock 70 kDa protein 1B;Heat shock 70 kDa protein 1A	yes	no	3	0.00025795	69.729	0	0	0	0	0	0			1397	110	1454	6429;6430;6431;6432	8685;8686;8687;8688	8688			4
YKAEDEVQR	P0DMV9;P0DMV8;P0DMV8-2	P0DMV9	525	533	HSPA1B;HSPA1A	Heat shock 70 kDa protein 1B;Heat shock 70 kDa protein 1A	no	no	2;3	5.4578e-33	125.71	0	0	10707000	0	0	2346400			2201	110	2290	10105;10106;10107;10108;10109	13653;13654;13655;13656;13657	13655			5
IIPGFMCQGGDFTR	P0DN26;A0A0B4J2A2;A0A075B759;Q9Y536;F5H284;P62937	P0DN26	56	69	PPIAL4C;PPIAL4E;PPIAL4A;PPIAL4D;PPIA	Peptidyl-prolyl cis-trans isomerase;Peptidyl-prolyl cis-trans isomerase A-like 4A/B/C;Peptidyl-prolyl cis-trans isomerase A-like 4D;Peptidyl-prolyl cis-trans isomerase A;Peptidyl-prolyl cis-trans isomerase A, N-terminally processed	yes	no	2	2.3343e-05	80.596	3081700	3187000	5409300	0	0	0			837	1	858;859	3547;3548;3549;3550;3551;3552	4644;4645;4646;4647;4648;4649	4644	0		6
NPQNSSQSADGLR	P0DN76;Q01081	P0DN76	54	66	U2AF1	Splicing factor U2AF 35 kDa subunit	yes	no	2	0.0049577	58.37	0	0	1234500	0	0	0			1387	111	1444	6386;6387	8642;8643	8642			2
EKLEATINELV	P10599-2;P10599	P10599-2	75	85	TXN	Thioredoxin	yes	no	2	0.0054845	54.416	0	0	0	0	0	0			400	112	414	1434	1739	1739			1
TAFQEALDAAGDK	P10599-2;P10599	P10599-2	9	21	TXN	Thioredoxin	yes	no	2	0.00019577	72.652	2109200	0	0	0	0	0			1794	112	1862	8443;8444	11424;11425	11424			2
VGEFSGANK	P10599-2;P10599	P10599-2	66	74	TXN	Thioredoxin	yes	no	2	0.013116	73.248	4151200	0	0	0	0	0			2010	112	2091	9369	12746	12746			1
VGGTSDVEVNEK	P10809	P10809	406	417	HSPD1	60 kDa heat shock protein, mitochondrial	yes	yes	2	0.0099492	58.37	0	0	0	0	0	0			2013	113	2094	9376	12753	12753			1
VTDALNATR	P10809	P10809	421	429	HSPD1	60 kDa heat shock protein, mitochondrial	yes	yes	2	1.8226e-09	119.27	0	1302400	1540100	0	0	0			2121	113	2208	9720;9721;9722;9723	13134;13135;13136;13137	13136			4
TVIIEQSWGSPK	P10809;P10809-2	P10809	61	72	HSPD1	60 kDa heat shock protein, mitochondrial	yes	no	2	0.007484	52.49	0	0	0	0	0	0			1932	113	2007	8975	12087	12087			1
AKFEELNMDLFR	P11021	P11021	325	336	HSPA5	78 kDa glucose-regulated protein	yes	yes	2;3	0.0047217	57.492	0	0	0	0	0	0			98	114	98;99	282;283;284	312;313;314	313	51		3
DAGTIAGLNVMR	P11021	P11021	186	197	HSPA5	78 kDa glucose-regulated protein	yes	yes	2	1.7192e-50	147.51	0	0	0	0	0	0			237	114	243;244	791;792;793	971;972;973	971	52		3
DNHLLGTFDLTGIPPAPR	P11021	P11021	475	492	HSPA5	78 kDa glucose-regulated protein	yes	yes	3	7.0285e-15	93.754	0	0	0	0	0	0			282	114	291	978;979;980	1176;1177;1178	1177			3
ELEEIVQPIISK	P11021	P11021	622	633	HSPA5	78 kDa glucose-regulated protein	yes	yes	2	3.3051e-21	130.98	0	0	0	0	0	0			414	114	428	1480;1481	1791;1792	1792			2
IDTRNELESYAYSLK	P11021	P11021	559	573	HSPA5	78 kDa glucose-regulated protein	yes	yes	3	0.00042156	51.606	0	0	0	0	0	0			794	114	815	3409;3410	4497;4498	4498			2
IEWLESHQDADIEDFK	P11021	P11021	602	617	HSPA5	78 kDa glucose-regulated protein	yes	yes	3	0.0015767	58.83	0	0	0	0	0	0			804	114	825	3435	4529	4529			1
IEWLESHQDADIEDFKAK	P11021	P11021	602	619	HSPA5	78 kDa glucose-regulated protein	yes	yes	4	0.018783	40.856	0	0	0	0	0	0			805	114	826	3436	4530	4530			1
IINEPTAAAIAYGLDKR	P11021	P11021	198	214	HSPA5	78 kDa glucose-regulated protein	yes	yes	2;3	8.2891e-15	94.639	0	0	0	0	0	0			835	114	856	3536;3537;3538;3539	4632;4633;4634;4635;4636	4633			5
ITITNDQNR	P11021	P11021	524	532	HSPA5	78 kDa glucose-regulated protein	yes	yes	2	7.4814e-224	217.59	0	0	0	0	0	0			913	114	939	3983;3984;3985	5251;5252;5253	5253			3
ITPSYVAFTPEGER	P11021	P11021	61	74	HSPA5	78 kDa glucose-regulated protein	yes	yes	2	2.5563e-08	94.363	0	0	0	0	0	0			917	114	943	3989;3990	5257;5258;5259	5258			3
KSDIDEIVLVGGSTR	P11021	P11021	353	367	HSPA5	78 kDa glucose-regulated protein	yes	yes	2;3	3.1161e-05	74.76	0	0	0	0	0	0			970	114	997	4153;4154;4155;4156	5482;5483;5484;5485	5482			4
KSQIFSTASDNQPTVTIK	P11021	P11021	447	464	HSPA5	78 kDa glucose-regulated protein	yes	yes	3	0.00010483	67.644	0	0	0	0	0	0			971	114	998	4157	5486	5486			1
LYGSAGPPPTGEEDTAEKDEL	P11021	P11021	634	654	HSPA5	78 kDa glucose-regulated protein	yes	yes	2	0.0021404	54.524	0	0	0	0	0	0			1252	114	1286	5795;5796	7940;7941	7940			2
MKETAEAYLGK	P11021	P11021	153	163	HSPA5	78 kDa glucose-regulated protein	yes	yes	2	0.02101	42.336	0	0	0	0	0	0			1280	114	1318	5847	7992	7992			0
MVNDAEKFAEEDKK	P11021	P11021	541	554	HSPA5	78 kDa glucose-regulated protein	yes	yes	4	0.0008595	36.292	0	0	0	0	0	0			1305	114	1355	5995;5996	8171;8172	8171			2
NELESYAYSLK	P11021	P11021	563	573	HSPA5	78 kDa glucose-regulated protein	yes	yes	2	0.00043876	90.108	0	0	0	0	0	0			1327	114	1377	6073;6074	8278;8279	8278			2
NQLTSNPENTVFDAK	P11021	P11021	82	96	HSPA5	78 kDa glucose-regulated protein	yes	yes	2;3	0.0011807	79.82	0	0	0	0	0	0			1393	114	1450	6407;6408;6409;6410	8663;8664;8665;8666	8663			4
NQLTSNPENTVFDAKR	P11021	P11021	82	97	HSPA5	78 kDa glucose-regulated protein	yes	yes	3	4.7032e-97	132.44	0	0	0	0	0	0			1394	114	1451	6411;6412;6413;6414;6415	8667;8668;8669;8670;8671	8669			5
SDIDEIVLVGGSTR	P11021	P11021	354	367	HSPA5	78 kDa glucose-regulated protein	yes	yes	2	1.1853e-14	115.33	0	0	0	0	0	0			1611	114	1675	7553;7554	10169;10170	10170			2
SQIFSTASDNQPTVTIK	P11021	P11021	448	464	HSPA5	78 kDa glucose-regulated protein	yes	yes	3	0.020781	40.856	0	0	0	0	0	0			1731	114	1797	8157	10999	10999			1
TFAPEEISAMVLTK	P11021	P11021	139	152	HSPA5	78 kDa glucose-regulated protein	yes	yes	2;3	0.0058825	68.44	0	0	0	0	0	0			1819	114	1887;1888	8551;8552;8553;8554	11542;11543;11544;11545	11543	53		4
TWNDPSVQQDIK	P11021	P11021	102	113	HSPA5	78 kDa glucose-regulated protein	yes	yes	2	4.9155e-51	152.97	0	0	0	0	0	0			1946	114	2024	9055;9056;9057;9058	12177;12178;12179;12180	12177			4
VLEDSDLKKSDIDEIVLVGGSTR	P11021	P11021	345	367	HSPA5	78 kDa glucose-regulated protein	yes	yes	4	0.009277	26.417	0	0	0	0	0	0			2057	114	2139	9495	12888	12888			1
VTHAVVTVPAYFNDAQR	P11021	P11021	165	181	HSPA5	78 kDa glucose-regulated protein	yes	yes	2;3	1.4543e-40	93.909	0	0	0	0	0	0			2125	114	2212	9735;9736;9737;9738;9739	13149;13150;13151;13152;13153	13150			5
VYEGERPLTK	P11021	P11021	465	474	HSPA5	78 kDa glucose-regulated protein	yes	yes	2;3	0.0026269	88.496	0	0	1451600	0	0	0			2147	114	2235	9829;9830;9831;9832;9833;9834;9835	13253;13254;13255;13256;13257;13258;13259	13255			7
IINEPTAAAIAYGLDK	P11021;P11142;P11142-2;P54652	P11021	198	213	HSPA5;HSPA8;HSPA2	78 kDa glucose-regulated protein;Heat shock cognate 71 kDa protein;Heat shock-related 70 kDa protein 2	no	no	2;3	1.6538e-12	95.018	0	0	11629000	0	0	9189100			833	114;115	854	3521;3522;3523;3524;3525;3526;3527;3528	4616;4617;4618;4619;4620;4621;4622;4623	4623			8
NSLESYAFNMK	P11142	P11142	540	550	HSPA8	Heat shock cognate 71 kDa protein	yes	yes	2	9.6356e-05	94.309	0	0	5974700	0	0	6906900			1404	115	1463	6461;6462	8729;8730	8729			2
DAGTIAGLNVLR	P11142;P11142-2	P11142	160	171	HSPA8	Heat shock cognate 71 kDa protein	yes	no	2	7.8588e-10	113.71	0	0	18341000	0	0	0			236	115	242	787;788;789;790	966;967;968;969;970	967			5
EIAEAYLGK	P11142;P11142-2	P11142	129	137	HSPA8	Heat shock cognate 71 kDa protein	yes	no	2	0.02102	65.252	0	0	4792700	0	0	5818300			387	115	400	1383;1384	1665;1666	1666			2
FDDAVVQSDMK	P11142;P11142-2	P11142	78	88	HSPA8	Heat shock cognate 71 kDa protein	yes	no	2	0.00026564	91.867	0	0	3139900	0	0	4030400			516	115	534	1865;1866	2269;2270	2269			2
MKEIAEAYLGK	P11142;P11142-2	P11142	127	137	HSPA8	Heat shock cognate 71 kDa protein	yes	no	3	0.0014897	53.569	0	0	0	0	0	0			1279	115	1317	5846	7991	7991			1
NQVAMNPTNTVFDAK	P11142;P11142-2	P11142	57	71	HSPA8	Heat shock cognate 71 kDa protein	yes	no	2	4.5774e-12	97.734	0	0	13915000	0	0	9294200			1398	115	1455;1456	6433;6434;6435;6436;6437;6438	8689;8690;8691;8692;8693;8694	8690	54		6
NQVAMNPTNTVFDAKR	P11142;P11142-2	P11142	57	72	HSPA8	Heat shock cognate 71 kDa protein	yes	no	3	2.4843e-09	87.566	0	0	0	0	0	0			1399	115	1457;1458	6439;6440;6441;6442;6443;6444	8695;8696;8697;8698;8699;8700	8698	54		6
QTQTFTTYSDNQPGVLIQVYEGER	P11142;P11142-2	P11142	424	447	HSPA8	Heat shock cognate 71 kDa protein	yes	no	3	0.00010388	43.162	0	0	0	0	0	0			1548	115	1611	6976	9362	9362			1
RFDDAVVQSDMK	P11142;P11142-2	P11142	77	88	HSPA8	Heat shock cognate 71 kDa protein	yes	no	2;3	1.3998e-05	62.088	0	0	4976100	0	0	4326400			1570	115	1634	7051;7052;7053;7054;7055;7056	9443;9444;9445;9446;9447;9448	9443			6
SFYPEEVSSMVLTK	P11142;P11142-2	P11142	113	126	HSPA8	Heat shock cognate 71 kDa protein	yes	no	2;3	0.00047417	77.593	0	0	9570300	0	0	6968100			1642	115	1708	7661;7662;7663;7664	10297;10298;10299;10300	10298			4
SQIHDIVLVGGSTR	P11142;P11142-2	P11142	329	342	HSPA8	Heat shock cognate 71 kDa protein	yes	no	2;3	0.00091863	68.44	2394400	0	8779700	0	0	11293000			1732	115	1798	8158;8159;8160;8161;8162	11000;11001;11002;11003;11004;11005	11003			3
TVTNAVVTVPAYFNDSQR	P11142;P11142-2	P11142	138	155	HSPA8	Heat shock cognate 71 kDa protein	yes	no	2;3	3.5196e-15	88.087	0	5014700	24104000	0	0	18991000			1944	115	2022	9045;9046;9047;9048;9049;9050;9051;9052;9053	12166;12167;12168;12169;12170;12171;12172;12173;12174;12175	12171			10
ARFEELNADLFR	P11142;P11142-2;P54652	P11142	300	311	HSPA8;HSPA2	Heat shock cognate 71 kDa protein;Heat shock-related 70 kDa protein 2	yes	no	2	0.00034618	70.977	0	0	0	0	0	0			171	115	175	577	709	709			1
FEELNADLFR	P11142;P11142-2;P54652	P11142	302	311	HSPA8;HSPA2	Heat shock cognate 71 kDa protein;Heat shock-related 70 kDa protein 2	yes	no	2	4.1395e-46	152.47	0	0	6458000	0	0	10666000			524	115	542	1881;1882	2286;2287	2287			2
IINEPTAAAIAYGLDKK	P11142;P11142-2;P54652	P11142	172	188	HSPA8;HSPA2	Heat shock cognate 71 kDa protein;Heat shock-related 70 kDa protein 2	yes	no	3	2.3327e-06	81.317	9036700	0	26364000	0	0	13464000			834	115	855	3529;3530;3531;3532;3533;3534;3535	4624;4625;4626;4627;4628;4629;4630;4631	4624			8
STAGDTHLGGEDFDNR	P11142;P11142-2;P54652	P11142	221	236	HSPA8;HSPA2	Heat shock cognate 71 kDa protein;Heat shock-related 70 kDa protein 2	yes	no	3	1.1867e-05	78.69	6661500	0	16787000	0	0	31045000			1758	115	1825	8304;8305;8306;8307;8308;8309;8310	11254;11255;11256;11257;11258;11259;11260;11261;11262	11262			9
VQVEYKGETK	P11142;P11142-2;P54652	P11142	103	112	HSPA8;HSPA2	Heat shock cognate 71 kDa protein;Heat shock-related 70 kDa protein 2	yes	no	2;3	0.002326	66.621	1252300	0	4655900	0	0	0			2109	115	2195	9677;9678;9679;9680;9681;9682	13088;13089;13090;13091;13092;13093;13094	13094			7
ELTAPDENIPAK	P11387	P11387	604	615	TOP1	DNA topoisomerase 1	yes	yes	2	0.0070733	63.283	0	0	0	0	0	0			436	116	451	1562	1877	1877			1
LEVQATDREENK	P11387	P11387	701	712	TOP1	DNA topoisomerase 1	yes	yes	3	4.0277e-05	78.692	0	0	4262700	0	0	1842900			1041	116	1070	4468;4469;4470;4471	5884;5885;5886;5887	5885			4
SGDHLHNDSQIEADFR	P11387	P11387	2	17	TOP1	DNA topoisomerase 1	yes	yes	3	6.5524e-10	89.911	0	0	0	0	0	0			1643	116	1709	7665;7666;7667	10301;10302;10303	10301			3
FLEEFITPIVK	P11388;P11388-2;P11388-3;P11388-4	P11388	569	579	TOP2A	DNA topoisomerase 2-alpha	yes	no	2	0.0058922	57.598	0	0	0	0	0	0			548	117	567	2026	2527	2527			1
AAQAPSSFQLLYDLK	P11586	P11586	805	819	MTHFD1	C-1-tetrahydrofolate synthase, cytoplasmic;Methylenetetrahydrofolate dehydrogenase;Methenyltetrahydrofolate cyclohydrolase;Formyltetrahydrofolate synthetase;C-1-tetrahydrofolate synthase, cytoplasmic, N-terminally processed	yes	yes	2	0.0039525	61.435	0	0	0	0	0	0			18	118	18	37	40	40			1
AYIQENLELVEK	P11586	P11586	722	733	MTHFD1	C-1-tetrahydrofolate synthase, cytoplasmic;Methylenetetrahydrofolate dehydrogenase;Methenyltetrahydrofolate cyclohydrolase;Formyltetrahydrofolate synthetase;C-1-tetrahydrofolate synthase, cytoplasmic, N-terminally processed	yes	yes	2	0.00040547	83	0	0	0	0	0	0			212	118	217	697;698	841;842	841			2
EIGLLSEEVELYGETK	P11586	P11586	337	352	MTHFD1	C-1-tetrahydrofolate synthase, cytoplasmic;Methylenetetrahydrofolate dehydrogenase;Methenyltetrahydrofolate cyclohydrolase;Formyltetrahydrofolate synthetase;C-1-tetrahydrofolate synthase, cytoplasmic, N-terminally processed	yes	yes	2	4.565e-05	80.69	0	0	0	0	0	0			392	118	405	1408	1712;1713	1713			2
EQVPGFTPR	P11586	P11586	29	37	MTHFD1	C-1-tetrahydrofolate synthase, cytoplasmic;Methylenetetrahydrofolate dehydrogenase;Methenyltetrahydrofolate cyclohydrolase;Formyltetrahydrofolate synthetase;C-1-tetrahydrofolate synthase, cytoplasmic, N-terminally processed	yes	yes	2	0.016466	69.628	0	0	0	0	0	0			458	118	474	1654	1982	1982			1
FSDIQIR	P11586	P11586	489	495	MTHFD1	C-1-tetrahydrofolate synthase, cytoplasmic;Methylenetetrahydrofolate dehydrogenase;Methenyltetrahydrofolate cyclohydrolase;Formyltetrahydrofolate synthetase;C-1-tetrahydrofolate synthase, cytoplasmic, N-terminally processed	yes	yes	2	0.016512	92.191	0	0	0	0	0	0			569	118	588	2106;2107	2634;2635	2634			2
GALALAQAVQR	P11586	P11586	794	804	MTHFD1	C-1-tetrahydrofolate synthase, cytoplasmic;Methylenetetrahydrofolate dehydrogenase;Methenyltetrahydrofolate cyclohydrolase;Formyltetrahydrofolate synthetase;C-1-tetrahydrofolate synthase, cytoplasmic, N-terminally processed	yes	yes	2	2.1131e-28	135.84	0	0	0	0	0	0			605	118	624	2301;2302;2303;2304;2305	2968;2969;2970;2971;2972	2969			5
GVPTGFILPIR	P11586	P11586	879	889	MTHFD1	C-1-tetrahydrofolate synthase, cytoplasmic;Methylenetetrahydrofolate dehydrogenase;Methenyltetrahydrofolate cyclohydrolase;Formyltetrahydrofolate synthetase;C-1-tetrahydrofolate synthase, cytoplasmic, N-terminally processed	yes	yes	2	0.0058924	58.981	0	0	0	0	0	0			738	118	759	2828;2829	3629;3630	3629			2
IFHELTQTDK	P11586	P11586	464	473	MTHFD1	C-1-tetrahydrofolate synthase, cytoplasmic;Methylenetetrahydrofolate dehydrogenase;Methenyltetrahydrofolate cyclohydrolase;Formyltetrahydrofolate synthetase;C-1-tetrahydrofolate synthase, cytoplasmic, N-terminally processed	yes	yes	2;3	0.00036735	66.595	0	0	0	0	0	0			809	118	830	3442;3443;3444;3445;3446	4536;4537;4538;4539;4540;4541	4536			6
ITIGQAPTEK	P11586	P11586	544	553	MTHFD1	C-1-tetrahydrofolate synthase, cytoplasmic;Methylenetetrahydrofolate dehydrogenase;Methenyltetrahydrofolate cyclohydrolase;Formyltetrahydrofolate synthetase;C-1-tetrahydrofolate synthase, cytoplasmic, N-terminally processed	yes	yes	2	0.00028191	74.92	0	0	0	0	0	0			910	118	936	3979;3980	5247;5248	5248			1
IYGADDIELLPEAQHK	P11586	P11586	833	848	MTHFD1	C-1-tetrahydrofolate synthase, cytoplasmic;Methylenetetrahydrofolate dehydrogenase;Methenyltetrahydrofolate cyclohydrolase;Formyltetrahydrofolate synthetase;C-1-tetrahydrofolate synthase, cytoplasmic, N-terminally processed	yes	yes	3	0.0032423	53.777	0	0	0	0	0	0			931	118	957	4013;4014;4015	5283;5284;5285	5283			3
KITIGQAPTEK	P11586	P11586	543	553	MTHFD1	C-1-tetrahydrofolate synthase, cytoplasmic;Methylenetetrahydrofolate dehydrogenase;Methenyltetrahydrofolate cyclohydrolase;Formyltetrahydrofolate synthetase;C-1-tetrahydrofolate synthase, cytoplasmic, N-terminally processed	yes	yes	3	0.0029372	36.303	0	0	0	0	0	0			952	118	979	4072;4073	5349;5350	5350			2
KVVGDVAYDEAK	P11586	P11586	251	262	MTHFD1	C-1-tetrahydrofolate synthase, cytoplasmic;Methylenetetrahydrofolate dehydrogenase;Methenyltetrahydrofolate cyclohydrolase;Formyltetrahydrofolate synthetase;C-1-tetrahydrofolate synthase, cytoplasmic, N-terminally processed	yes	yes	3	0.00064833	43.382	0	0	0	0	0	0			975	118	1002	4200	5548	5548			1
LDIDPETITWQR	P11586	P11586	521	532	MTHFD1	C-1-tetrahydrofolate synthase, cytoplasmic;Methylenetetrahydrofolate dehydrogenase;Methenyltetrahydrofolate cyclohydrolase;Formyltetrahydrofolate synthetase;C-1-tetrahydrofolate synthase, cytoplasmic, N-terminally processed	yes	yes	2	0.00015686	85.355	0	0	0	0	0	0			1012	118	1039	4368;4369;4370;4371	5761;5762;5763;5764	5764			4
LVPSVNGVR	P11586	P11586	479	487	MTHFD1	C-1-tetrahydrofolate synthase, cytoplasmic;Methylenetetrahydrofolate dehydrogenase;Methenyltetrahydrofolate cyclohydrolase;Formyltetrahydrofolate synthetase;C-1-tetrahydrofolate synthase, cytoplasmic, N-terminally processed	yes	yes	2	0.011929	88.029	0	0	0	0	0	0			1239	118	1272	5758;5759	7899;7900	7900			2
TDPTTLTDEEINR	P11586	P11586	505	517	MTHFD1	C-1-tetrahydrofolate synthase, cytoplasmic;Methylenetetrahydrofolate dehydrogenase;Methenyltetrahydrofolate cyclohydrolase;Formyltetrahydrofolate synthetase;C-1-tetrahydrofolate synthase, cytoplasmic, N-terminally processed	yes	yes	2	1.1005e-06	91.855	0	0	0	0	0	0			1805	118	1873	8490;8491;8492;8493;8494	11473;11474;11475;11476;11477	11475			5
TDTESELDLISR	P11586	P11586	761	772	MTHFD1	C-1-tetrahydrofolate synthase, cytoplasmic;Methylenetetrahydrofolate dehydrogenase;Methenyltetrahydrofolate cyclohydrolase;Formyltetrahydrofolate synthetase;C-1-tetrahydrofolate synthase, cytoplasmic, N-terminally processed	yes	yes	2	1.9481e-09	109.42	0	0	0	0	0	0			1806	118	1874	8495;8496;8497;8498	11478;11479;11480;11481;11482	11478			5
TPVPSDIDISR	P11586	P11586	314	324	MTHFD1	C-1-tetrahydrofolate synthase, cytoplasmic;Methylenetetrahydrofolate dehydrogenase;Methenyltetrahydrofolate cyclohydrolase;Formyltetrahydrofolate synthetase;C-1-tetrahydrofolate synthase, cytoplasmic, N-terminally processed	yes	yes	2	5.7092e-07	107.79	0	0	0	0	0	0			1896	118	1968	8844;8845;8846;8847	11937;11938;11939;11940	11938			4
VLLSALER	P11586	P11586	355	362	MTHFD1	C-1-tetrahydrofolate synthase, cytoplasmic;Methylenetetrahydrofolate dehydrogenase;Methenyltetrahydrofolate cyclohydrolase;Formyltetrahydrofolate synthetase;C-1-tetrahydrofolate synthase, cytoplasmic, N-terminally processed	yes	yes	2	0.025644	79.116	0	0	0	0	0	0			2067	118	2149	9528;9529	12921;12922	12921			2
YVVVTGITPTPLGEGK	P11586	P11586	371	386	MTHFD1	C-1-tetrahydrofolate synthase, cytoplasmic;Methylenetetrahydrofolate dehydrogenase;Methenyltetrahydrofolate cyclohydrolase;Formyltetrahydrofolate synthetase;C-1-tetrahydrofolate synthase, cytoplasmic, N-terminally processed	yes	yes	2	2.4471e-33	131.43	0	0	0	0	0	0			2236	118	2327	10248;10249;10250;10251;10252;10253	13822;13823;13824;13825;13826;13827	13825			6
LLEGEEYR	P12035;CON__P19013;P19013	P12035	505	512	KRT3;KRT4	Keratin, type II cytoskeletal 3;Keratin, type II cytoskeletal 4	no	no	2	0.024687	81.297	0	2276500	0	0	0	0		+	1107	119;27	1136	5012	6744	6744			1
ELGICPDDAAVIPIK	P12273	P12273	119	133	PIP	Prolactin-inducible protein	yes	yes	2	0.0059086	58.676	0	0	0	0	0	0			417	120	432	1490;1491	1801;1802	1802			2
TVQIAAVVDVIR	P12273	P12273	107	118	PIP	Prolactin-inducible protein	yes	yes	2	2.5777e-05	95.573	0	0	0	0	740390	0			1938	120	2014	9030;9031;9032	12151;12152;12153	12151			3
TYLISSIPLQGAFNYK	P12273	P12273	70	85	PIP	Prolactin-inducible protein	yes	yes	3	0.0083784	48.112	0	0	0	0	0	0			1950	120	2028	9064	12186	12186			1
ANPQVGVAFPHIK	P13010	P13010	401	413	XRCC5	X-ray repair cross-complementing protein 5	yes	yes	3	0.003903	35.204	0	0	0	0	0	0			144	121	147	413;414	479;480	479			2
DQVTAQEIFQDNHEDGPTAK	P13010	P13010	546	565	XRCC5	X-ray repair cross-complementing protein 5	yes	yes	3	0.029636	29.384	0	0	0	0	0	0			298	121	307	1037	1239	1239			1
EEASGSSVTAEEAKK	P13010	P13010	689	703	XRCC5	X-ray repair cross-complementing protein 5	yes	yes	3	3.2647e-33	130.24	0	0	1322000	0	0	0			365	121	377	1291;1292;1293;1294;1295;1296	1540;1541;1542;1543;1544;1545	1540			6
GITEQQKEGLEIVK	P13010	P13010	196	209	XRCC5	X-ray repair cross-complementing protein 5	yes	yes	3	0.024358	29.912	0	0	0	0	0	0			669	121	688	2559	3284	3284			1
HIEIFTDLSSR	P13010	P13010	131	141	XRCC5	X-ray repair cross-complementing protein 5	yes	yes	2	0.00015325	87.308	0	0	0	0	0	0			756	121	777	2957;2958;2959	3819;3820;3821	3819			3
LFQCLLHR	P13010	P13010	490	497	XRCC5	X-ray repair cross-complementing protein 5	yes	yes	2	0.022767	86.113	0	0	0	0	0	0			1047	121	1076	4483	5899	5899			1
LTIGSNLSIR	P13010	P13010	251	260	XRCC5	X-ray repair cross-complementing protein 5	yes	yes	2	8.7032e-07	110.87	0	0	0	0	0	0			1216	121	1249	5682;5683;5684	7816;7817;7818	7817			3
TDTLEDLFPTTK	P13010	P13010	470	481	XRCC5	X-ray repair cross-complementing protein 5	yes	yes	2	0.0048443	73.067	0	0	0	0	0	0			1808	121	1876	8503;8504;8505	11487;11488;11489	11487			3
TLFPLIEAK	P13010	P13010	535	543	XRCC5	X-ray repair cross-complementing protein 5	yes	yes	2	0.016261	69.825	0	0	0	0	0	0			1852	121	1922	8656;8657	11651;11652	11652			2
TWTVVDAK	P13010	P13010	275	282	XRCC5	X-ray repair cross-complementing protein 5	yes	yes	2	0.025603	75.189	0	0	0	0	0	0			1947	121	2025	9059;9060;9061	12181;12182;12183	12183			3
VITMFVQR	P13010	P13010	37	44	XRCC5	X-ray repair cross-complementing protein 5	yes	yes	2	0.012605	97.071	0	0	0	0	0	0			2041	121	2122;2123	9429;9430;9431;9432	12806;12807;12808;12809	12808	55		2
YGSDIVPFSK	P13010	P13010	316	325	XRCC5	X-ray repair cross-complementing protein 5	yes	yes	2	0.0087184	66.621	0	0	0	0	0	0			2187	121	2275	10028	13551	13551			1
AGIIASAR	P13639	P13639	43	50	EEF2	Elongation factor 2	yes	yes	2	0.022808	89.55	0	0	0	0	0	0			72	122	72	217;218;219;220	245;246;247;248;249;250	249			6
ARPFPDGLAEDIDKGEVSAR	P13639	P13639	606	625	EEF2	Elongation factor 2	yes	yes	3;4	4.9957e-11	89.483	0	0	0	0	0	0			173	122	177	579;580;581;582;583;584;585;586	711;712;713;714;715;716;717;718;719;720;721	721			11
AYLPVNESFGFTADLR	P13639	P13639	786	801	EEF2	Elongation factor 2	yes	yes	2	0.0040973	66.289	0	0	0	0	0	0			215	122	220	710	855	855			1
CLYASVLTAQPR	P13639	P13639	728	739	EEF2	Elongation factor 2	yes	yes	2	0.0056819	57.598	0	0	0	0	0	0			226	122	232	748	911	911			1
EDLYLKPIQR	P13639	P13639	440	449	EEF2	Elongation factor 2	yes	yes	2;3	0.0027311	87.323	0	0	0	0	0	0			360	122	372	1266;1267;1268;1269;1270	1514;1515;1516;1517;1518	1518			5
EGALCEENMR	P13639	P13639	689	698	EEF2	Elongation factor 2	yes	yes	2	3.9097e-11	120.07	0	0	0	0	0	0			374	122	386	1322;1323;1324;1325	1573;1574;1575;1576;1577;1578	1575			6
ETVSEESNVLCLSK	P13639	P13639	581	594	EEF2	Elongation factor 2	yes	yes	2	0.00034893	73.848	0	0	0	0	0	0			476	122	492	1695;1696;1697	2030;2031;2032	2031			3
FSVSPVVR	P13639	P13639	499	506	EEF2	Elongation factor 2	yes	yes	2	0.0055291	85.265	0	0	0	0	0	0			585	122	604	2247;2248;2249	2912;2913;2914	2912			3
GEGQLGPAER	P13639	P13639	240	249	EEF2	Elongation factor 2	yes	yes	2	3.9838e-17	128	2297000	0	0	0	0	0			620	122	639	2345;2346;2347;2348;2349	3012;3013;3014;3015;3016	3013			5
GHVFEESQVAGTPMFVVK	P13639	P13639	768	785	EEF2	Elongation factor 2	yes	yes	3	2.8898e-05	76.82	0	0	0	0	0	0			660	122	679	2544;2545	3269;3270	3270			2
IMGPNYTPGK	P13639	P13639	429	438	EEF2	Elongation factor 2	yes	yes	2	0.0099797	76.064	0	0	0	0	0	0			870	122	896	3809;3810;3811	4992;4993;4994	4992			3
IMGPNYTPGKK	P13639	P13639	429	439	EEF2	Elongation factor 2	yes	yes	3	0.0069019	37.681	0	0	0	0	0	0			871	122	897	3812;3813	4995;4996	4995			1
QFAEMYVAK	P13639	P13639	227	235	EEF2	Elongation factor 2	yes	yes	2	0.0021216	62.464	0	0	0	0	0	0			1473	122	1535	6676;6677;6678	8986;8987;8988	8987			2
RCLYASVLTAQPR	P13639	P13639	727	739	EEF2	Elongation factor 2	yes	yes	3	0.00065876	38.3	0	0	0	0	0	0			1567	122	1631	7047;7048	9439;9440	9439			2
SDPVVSYR	P13639	P13639	573	580	EEF2	Elongation factor 2	yes	yes	2	0.023389	91.626	0	0	0	0	0	0			1613	122	1679	7565;7566;7567	10181;10182;10183	10182			3
STLTDSLVCK	P13639	P13639	33	42	EEF2	Elongation factor 2	yes	yes	2	0.001737	79.906	0	0	0	0	0	0			1764	122	1831	8325;8326;8327;8328;8329	11277;11278;11279;11280;11281	11279			5
TILMMGR	P13639	P13639	450	456	EEF2	Elongation factor 2	yes	yes	2	0.01251	94.669	0	0	0	0	0	0			1840	122	1909;1910	8613;8614;8615	11605;11606;11607	11605	56;57		3
VFDAIMNFK	P13639	P13639	300	308	EEF2	Elongation factor 2	yes	yes	2	0.029966	57.559	0	0	1543600	0	0	0			1994	122	2075	9330	12706	12706			1
VFSGLVSTGLK	P13639	P13639	416	426	EEF2	Elongation factor 2	yes	yes	2	8.9427e-07	107.15	0	0	5261600	0	0	0			2003	122	2084	9346;9347;9348;9349;9350;9351	12723;12724;12725;12726;12727;12728	12725			6
VNFTVDQIR	P13639	P13639	2	10	EEF2	Elongation factor 2	yes	yes	2	1.2304e-22	133.55	3255800	2271300	0	0	0	0			2088	122	2174	9586;9587;9588;9589;9590;9591;9592	12982;12983;12984;12985;12986;12987;12988	12983			7
YEWDVAEAR	P13639	P13639	639	647	EEF2	Elongation factor 2	yes	yes	2	0.018168	67.993	1229900	1014300	1677900	0	0	0			2179	122	2267	10011;10012;10013	13533;13534;13535	13534			3
YFDPANGK	P13639	P13639	265	272	EEF2	Elongation factor 2	yes	yes	2	0.00010071	111.28	0	0	0	0	0	0			2181	122	2269	10015;10016;10017;10018;10019;10020	13537;13538;13539;13540;13541;13542;13543	13541			7
YLAEKYEWDVAEAR	P13639	P13639	634	647	EEF2	Elongation factor 2	yes	yes	2;3	0.010761	56.094	0	0	0	0	0	0			2204	122	2293	10113;10114;10115;10116;10117	13661;13662;13663;13664;13665;13666	13665			6
GGGQIIPTAR	P13639;Q15029-2;Q15029-3;Q15029	P13639	717	726	EEF2;EFTUD2	Elongation factor 2;116 kDa U5 small nuclear ribonucleoprotein component	no	no	2	0.0032883	85.161	0	0	0	0	0	0			645	122;304	664	2447	3146	3146			1
DLGLSESGEDVNAAILDESGKK	P13667	P13667	464	485	PDIA4	Protein disulfide-isomerase A4	yes	yes	3	1.6227e-06	63.184	0	0	0	0	0	0			273	123	281	952	1150	1150			1
IDATSASVLASR	P13667	P13667	120	131	PDIA4	Protein disulfide-isomerase A4	yes	yes	2	0.00011336	77.379	0	0	0	0	0	0			788	123	809	3392	4473	4473			1
MDATANDVPSDR	P13667	P13667	583	594	PDIA4	Protein disulfide-isomerase A4	yes	yes	2	0.0001322	79.974	0	0	0	0	0	0			1262	123	1298	5821	7966	7966			1
TQVELLEAPTPALKR	P13807-2;P13807	P13807-2	75	89	GYS1	Glycogen [starch] synthase, muscle	yes	no	3	0.0022803	37.555	0	0	0	0	0	0			1903	124	1975	8861;8862;8863	11954;11955;11956	11955			3
ESLQQMAEVTR	P14314-2;P14314	P14314-2	125	135	PRKCSH	Glucosidase 2 subunit beta	yes	no	2	0.0058919	55.567	0	0	0	0	0	0			465	125	481	1664	1993	1993			1
LDIDSPPITAR	P14618;P14618-2	P14618	33	43	PKM	Pyruvate kinase PKM	yes	no	2	0.0050298	64.04	0	2242900	2608500	0	0	0			1013	126	1040	4372;4373;4374;4375	5765;5766;5767;5768	5765			4
NTGIICTIGPASR	P14618;P14618-2	P14618	44	56	PKM	Pyruvate kinase PKM	yes	no	2	5.4654e-08	98.353	3098500	2847000	3221100	0	0	0			1413	126	1472	6474;6475;6476;6477;6478;6479	8742;8743;8744;8745;8746;8747	8745			6
GVNLPGAAVDLPAVSEK	P14618;P14618-2;P14618-3	P14618	208	224	PKM	Pyruvate kinase PKM	yes	no	2	0.017057	53.528	0	3537600	0	0	0	0			737	126	758	2827	3628	3628			1
ITLDNAYMEK	P14618;P14618-2;P14618-3	P14618	142	151	PKM	Pyruvate kinase PKM	yes	no	2	0.016727	55.549	0	0	1435500	0	0	0			914	126	940	3986	5254	5254			1
KGVNLPGAAVDLPAVSEK	P14618;P14618-2;P14618-3	P14618	207	224	PKM	Pyruvate kinase PKM	yes	no	3	0.0077173	40.349	0	2157700	1331300	0	0	0			950	126	977	4067;4068	5344;5345	5344			2
GDLGIEIPAEK	P14618;P14618-2;P14618-3;P30613-2;P30613	P14618	295	305	PKM;PKLR	Pyruvate kinase PKM;Pyruvate kinase PKLR	yes	no	2	0.0013538	70.056	0	3618000	4562500	0	0	0			615	126	634	2329;2330;2331;2332	2996;2997;2998;2999	2998			4
LAPITSDPTEATAVGAVEASFK	P14618;P14618-3	P14618	401	422	PKM	Pyruvate kinase PKM	yes	no	2	0.0002879	80.534	0	0	0	0	0	0			991	126	1018	4313	5695	5695			1
DISTNYYASQK	P14625	P14625	672	682	HSP90B1	Endoplasmin	yes	yes	2	0.00031383	78.934	0	0	0	0	0	0			259	127	267	910;911;912;913	1107;1108;1109;1110	1110			4
EAESSPFVER	P14625	P14625	548	557	HSP90B1	Endoplasmin	yes	yes	2	0.0028956	75.378	0	0	0	0	0	0			339	127	351	1180;1181	1406;1407	1407			2
FAFQAEVNR	P14625	P14625	76	84	HSP90B1	Endoplasmin	yes	yes	2	0.0014915	123.69	0	0	0	0	0	0			505	127	523	1800;1801;1802;1803	2166;2167;2168;2169	2166			4
FQSSHHPTDITSLDQYVER	P14625	P14625	512	530	HSP90B1	Endoplasmin	yes	yes	4	0.0001824	60.564	0	0	0	0	0	0			567	127	586	2100;2101	2628;2629	2628			2
GVVDSDDLPLNVSR	P14625	P14625	435	448	HSP90B1	Endoplasmin	yes	yes	2	3.6446e-07	90.653	0	0	0	0	0	0			741	127	762	2832;2833;2834	3633;3634;3635	3635			3
LIINSLYK	P14625	P14625	88	95	HSP90B1	Endoplasmin	yes	yes	2	0.025866	69.998	0	0	0	0	0	0			1073	127	1102	4796	6338	6338			1
SILFVPTSAPR	P14625	P14625	385	395	HSP90B1	Endoplasmin	yes	yes	2	0.0013538	70.056	0	0	0	0	0	0			1661	127	1727	7815;7816;7817	10496;10497;10498	10496			3
TDDEVVQREEEAIQLDGLNASQIR	P14625	P14625	44	67	HSP90B1	Endoplasmin	yes	yes	3	3.7878e-06	58.974	0	0	0	0	0	0			1802	127	1870	8487	11470	11470			1
TETVEEPMEEEEAAKEEK	P14625	P14625	286	303	HSP90B1	Endoplasmin	yes	yes	3	0.029233	31.462	0	0	0	0	0	0			1818	127	1886	8550	11541	11541			1
GLFDEYGSK	P14625;Q58FF3	P14625	396	404	HSP90B1;HSP90B2P	Endoplasmin;Putative endoplasmin-like protein	yes	no	2	0.027899	59.245	0	0	0	0	0	0			678	127	697	2579	3304	3304			1
LGVIEDHSNR	P14625;Q58FF3	P14625	494	503	HSP90B1;HSP90B2P	Endoplasmin;Putative endoplasmin-like protein	yes	no	3	0.0026477	59.426	0	0	0	0	0	0			1065	127	1094	4784	6326	6326			1
AGDKDDITEPAVCALR	P14923	P14923	445	460	JUP	Junction plakoglobin	yes	yes	2;3	0.00082152	75.78	4832400	0	0	0	0	0			66	128	66	191;192;193;194;195;196	218;219;220;221;222;223	223			6
ALMGSPQLVAAVVR	P14923	P14923	178	191	JUP	Junction plakoglobin	yes	yes	2	0.0015748	75.509	0	0	0	0	0	0			122	128	123;124	366;367;368;369	432;433;434;435	434	58		3
HPEAEMAQNSVR	P14923	P14923	466	477	JUP	Junction plakoglobin	yes	yes	3	4.9813e-06	74.962	0	0	0	0	0	0			765	128	786	3037;3038;3039	3942;3943;3944	3942			2
ISEDKNPDYR	P14923	P14923	652	661	JUP	Junction plakoglobin	yes	yes	3	0.0059618	59.426	0	0	0	2206400	0	0			899	128	925	3917;3918;3919	5177;5178;5179	5178			3
LLNDEDPVVVTK	P14923	P14923	150	161	JUP	Junction plakoglobin	yes	yes	2	0.00031858	73.067	4389200	0	0	0	0	0			1121	128	1150	5039;5040;5041;5042	6771;6772;6773;6774	6771			4
LNTIPLFVQLLYSSVENIQR	P14923	P14923	583	602	JUP	Junction plakoglobin	yes	yes	3	0.00048568	55.763	0	0	0	0	0	0			1154	128	1186	5183	6945	6945			1
NEGTATYAAAVLFR	P14923	P14923	638	651	JUP	Junction plakoglobin	yes	yes	2	0.00010711	93.058	0	0	0	0	0	0			1326	128	1376	6071;6072	8276;8277	8277			2
NLALCPANHAPLQEAAVIPR	P14923	P14923	507	526	JUP	Junction plakoglobin	yes	yes	3	2.6514e-11	87.49	0	0	0	0	0	0			1354	128	1408	6237;6238;6239	8476;8477;8478	8478			3
NLSDVATK	P14923	P14923	378	385	JUP	Junction plakoglobin	yes	yes	2	0.032917	54.157	0	0	0	0	0	0			1364	128	1418	6275	8514	8514			1
NLSDVATKQEGLESVLK	P14923	P14923	378	394	JUP	Junction plakoglobin	yes	yes	3	0.018972	41.912	0	0	0	0	0	0			1365	128	1419	6276	8515	8515			1
SAIVHLINYQDDAELATR	P14923	P14923	125	142	JUP	Junction plakoglobin	yes	yes	3	1.3777e-06	63.337	0	0	0	0	0	0			1601	128	1665	7454;7455;7456	10009;10010;10011	10010			3
TMQNTSDLDTAR	P14923	P14923	192	203	JUP	Junction plakoglobin	yes	yes	2	1.4091e-05	98.249	3483600	743190	871780	1842400	0	0			1872	128	1943;1944	8744;8745;8746;8747;8748;8749;8750;8751;8752;8753;8754;8755;8756;8757;8758	11797;11798;11799;11800;11801;11802;11803;11804;11805;11806;11807;11808;11809;11810;11811;11812	11809	59		16
VLSVCPSNKPAIVEAGGMQALGK	P14923	P14923	337	359	JUP	Junction plakoglobin	yes	yes	3	0.0011462	48.616	0	0	0	0	0	0			2072	128	2154	9535	12928	12928	60		1
VSVELTNSLFK	P14923	P14923	664	674	JUP	Junction plakoglobin	yes	yes	2	0.0063428	54.608	0	0	0	0	0	0			2118	128	2204	9703;9704	13117;13118	13117			2
LVQNCLWTLR	P14923;P35222	P14923	368	377	JUP;CTNNB1	Junction plakoglobin;Catenin beta-1	yes	no	2	0.006385	69.954	0	0	0	0	0	0			1242	128	1275	5763;5764	7904;7905	7904			2
ENLSAAFSR	P15170-2;P15170-3	P15170-2	59	67	GSPT1	Eukaryotic peptide chain release factor GTP-binding subunit ERF3A	yes	no	2	0.016497	69.598	0	0	0	0	0	0			453	129	468	1620	1943	1943			1
FVKQDQVCIAR	P15170-2;P15170-3;P15170;Q8IYD1	P15170-2	583	593	GSPT1;GSPT2	Eukaryotic peptide chain release factor GTP-binding subunit ERF3A;Eukaryotic peptide chain release factor GTP-binding subunit ERF3B	yes	no	3	0.0026168	49.5	0	0	0	0	0	0			590	129	609	2256	2921	2921			1
ITNLTQQLEQASIVK	P15924	P15924	1612	1626	DSP	Desmoplakin	yes	yes	2	0.023527	49.423	0	0	0	0	0	0			916	131	942	3988	5256	5256			1
LKNTLTQTTENLR	P15924	P15924	1412	1424	DSP	Desmoplakin	yes	yes	3	0.026328	29.328	0	0	0	0	0	0			1084	131	1113	4877	6500	6500			1
LQSLTENLTK	P15924	P15924	1706	1715	DSP	Desmoplakin	yes	yes	2	0.0023468	81.972	3174000	0	0	0	0	0			1176	131	1209	5234;5235;5236;5237	7002;7003;7004;7005	7003			4
NTLTQTTENLR	P15924	P15924	1414	1424	DSP	Desmoplakin	yes	yes	2	0.0056192	63.076	0	0	0	0	0	0			1418	131	1477	6490;6491	8758;8759	8758			2
QLLQEQESVK	P15924	P15924	1667	1676	DSP	Desmoplakin	yes	yes	2	0.0038494	87.639	0	0	0	0	0	0			1503	131	1565	6806;6807	9147;9148	9147			2
SEADSDKNATILELR	P15924	P15924	1739	1753	DSP	Desmoplakin	yes	yes	3	0.017234	28.956	0	0	0	0	0	0			1616	131	1682	7574	10195	10195			1
SQLQISNNR	P15924	P15924	1754	1762	DSP	Desmoplakin	yes	yes	2	1.8167e-09	119.29	0	0	0	0	0	0			1735	131	1801	8166;8167;8168;8169	11009;11010;11011;11012	11012			4
TLELQGLINDLQR	P15924	P15924	1763	1775	DSP	Desmoplakin	yes	yes	2	0.017547	45.137	0	0	0	0	0	0			1851	131	1921	8654;8655	11649;11650	11649			2
VQEQELTR	P15924	P15924	1530	1537	DSP	Desmoplakin	yes	yes	2	0.03074	61.962	0	0	0	0	0	0			2104	131	2190	9668	13078	13078			0
LNDSILQATEQR	P15924;P15924-3	P15924	1256	1267	DSP	Desmoplakin	yes	no	2	0.000198	88.441	0	0	0	0	0	0			1145	131	1177	5164;5165;5166;5167	6926;6927;6928;6929	6929			4
AELIVQPELK	P15924;P15924-3;P15924-2	P15924	85	94	DSP	Desmoplakin	yes	no	2	0.0034794	74.464	4472500	0	0	0	0	0			51	131	51	148;149	171;172	172			2
AQQIHSQTSQQYPLYDLDLGK	P15924;P15924-3;P15924-2	P15924	835	855	DSP	Desmoplakin	yes	no	3	2.6186e-05	62.362	3492800	0	0	0	0	0			165	131	169	535;536;537;538;539	643;644;645;646;647	647			5
ETQSQLETER	P15924;P15924-3;P15924-2	P15924	1923	1932	DSP	Desmoplakin	yes	no	2	1.2894e-47	125.47	0	0	0	0	0	0			474	131	490	1689;1690;1691;1692	2024;2025;2026;2027	2026			1
FGDSNTVMR	P15924;P15924-3;P15924-2	P15924	917	925	DSP	Desmoplakin	yes	no	2	0.010095	83.265	0	0	0	0	0	0			532	131	551	1949	2358	2358			1
FLDQNLQK	P15924;P15924-3;P15924-2	P15924	1057	1064	DSP	Desmoplakin	yes	no	2	0.022852	86.866	3923500	0	0	0	0	0			547	131	566	2023;2024;2025	2524;2525;2526	2525			3
IEVLEEELR	P15924;P15924-3;P15924-2	P15924	1034	1042	DSP	Desmoplakin	yes	no	2	0.0096716	90.657	0	1495500	1597300	3181000	0	0			803	131	824	3432;3433;3434	4526;4527;4528	4528			3
IVQLKPR	P15924;P15924-3;P15924-2	P15924	445	451	DSP	Desmoplakin	yes	no	2	0.027766	74.832	0	0	0	0	0	0			926	131	952	4006;4007	5276;5277	5276			2
LASLEELKR	P15924;P15924-3;P15924-2	P15924	1076	1084	DSP	Desmoplakin	yes	no	2	0.034186	63.419	0	0	0	0	0	0			996	131	1023	4321	5704	5704			1
LEDELNR	P15924;P15924-3;P15924-2	P15924	1832	1838	DSP	Desmoplakin	yes	no	2	0.0074267	104.11	0	0	0	0	0	0			1028	131	1057	4428	5829	5829			1
LLEAQIATGGIIDPK	P15924;P15924-3;P15924-2	P15924	2367	2381	DSP	Desmoplakin	yes	no	2	0.0024282	66.289	0	0	0	0	0	0			1099	131	1128	4975;4976	6699;6700	6699			2
LLQLQEQMR	P15924;P15924-3;P15924-2	P15924	142	150	DSP	Desmoplakin	yes	no	2	0.011351	86.953	1821300	0	0	0	0	0			1130	131	1160	5075;5076	6807;6808	6807			2
LPVEEAYKR	P15924;P15924-3;P15924-2	P15924	2310	2318	DSP	Desmoplakin	yes	no	3	0.00055942	99.802	0	0	0	0	0	0			1160	131	1192	5194;5195;5196;5197	6957;6958;6959;6960	6957			4
LTYEIEDEK	P15924;P15924-3;P15924-2	P15924	1114	1122	DSP	Desmoplakin	yes	no	2	0.037479	53.968	1110800	0	0	0	0	0			1222	131	1255	5701	7836	7836			1
LTYEIEDEKR	P15924;P15924-3;P15924-2	P15924	1114	1123	DSP	Desmoplakin	yes	no	3	0.0018981	39.917	0	0	0	0	0	0			1223	131	1256	5702;5703	7837;7838	7838			1
NQCTQVVQER	P15924;P15924-3;P15924-2	P15924	1803	1812	DSP	Desmoplakin	yes	no	2	4.1395e-46	152.47	0	0	0	0	0	0			1390	131	1447	6394;6395;6396;6397;6398;6399	8650;8651;8652;8653;8654;8655	8650			6
QLQNIIQATSR	P15924;P15924-3;P15924-2	P15924	271	281	DSP	Desmoplakin	yes	no	2	5.8162e-09	109.66	3495000	0	0	0	0	0			1506	131	1568	6813;6814;6815;6816;6817;6818	9155;9156;9157;9158;9159;9160	9160			6
QQIQNDLNQWK	P15924;P15924-3;P15924-2	P15924	1858	1868	DSP	Desmoplakin	yes	no	2	4.6293e-05	98.033	0	0	0	0	0	0			1526	131	1589	6863;6864;6865	9207;9208;9209	9207			3
QVQNLVNK	P15924;P15924-3;P15924-2	P15924	434	441	DSP	Desmoplakin	yes	no	2	0.022742	85.89	3537600	0	0	0	0	0			1557	131	1621	7019;7020;7021;7022	9410;9411;9412;9413	9410			4
TMIQSPSGVILQEAADVHAR	P15924;P15924-3;P15924-2	P15924	983	1002	DSP	Desmoplakin	yes	no	3	2.2604e-06	76.027	0	0	0	0	0	0			1868	131	1938;1939	8735;8736;8737;8738	11788;11789;11790;11791	11790	61		4
VTQLTDR	P15924;P15924-3;P15924-2	P15924	860	866	DSP	Desmoplakin	yes	no	2	0.0043207	94.407	0	0	0	0	0	0			2132	131	2220	9790;9791	13213;13214	13213			2
YEVTSGGGGTSR	P15924;P15924-3;P15924-2	P15924	28	39	DSP	Desmoplakin	yes	no	2	0.0049347	61.65	2781000	1774200	1072200	0	0	0			2178	131	2266	10006;10007;10008;10009;10010	13528;13529;13530;13531;13532	13530			5
YGDGIQLTR	P15924;P15924-3;P15924-2	P15924	95	103	DSP	Desmoplakin	yes	no	2	0.027899	59.245	0	0	0	1393400	0	0			2183	131	2271	10022;10023	13545;13546	13545			2
YIELLTR	P15924;P15924-3;P15924-2	P15924	1003	1009	DSP	Desmoplakin	yes	no	2	0.032633	70.912	3857800	0	0	0	0	0			2197	131	2286	10091	13637	13637			1
YQAECSQFK	P15924;P15924-3;P15924-2	P15924	1065	1073	DSP	Desmoplakin	yes	no	2	0.02625	60.59	0	0	0	0	0	0			2216	131	2306	10199	13771	13771			1
SETAPAAPAAAPPAEK	P16403	P16403	2	17	HIST1H1C	Histone H1.2	yes	yes	2	2.5907e-13	94.191	2980500	0	5968200	0	0	0			1634	132	1700	7627;7628;7629	10263;10264;10265	10265			3
ASGPPVSELITK	P16403;P10412;P16402	P16403	35	46	HIST1H1C;HIST1H1E;HIST1H1D	Histone H1.2;Histone H1.4;Histone H1.3	yes	no	2	9.3816e-05	58.37	8944500	0	0	0	0	0			176	132	180	590;591;592	725;726;727	727			2
KASGPPVSELITK	P16403;P10412;P16402	P16403	34	46	HIST1H1C;HIST1H1E;HIST1H1D	Histone H1.2;Histone H1.4;Histone H1.3	yes	no	2	0.031273	44.299	0	0	0	0	0	0			937	132	963	4026	5297	5297			1
SGVSLAALKK	P16403;P10412;P16402	P16403	55	64	HIST1H1C;HIST1H1E;HIST1H1D	Histone H1.2;Histone H1.4;Histone H1.3	yes	no	2	0.0096685	69.812	0	0	0	0	0	0			1655	132	1721	7721;7722;7723;7724	10379;10380;10381;10382	10380			4
ALAAAGYDVEK	P16403;P10412;P16402;P22492;Q02539	P16403	65	75	HIST1H1C;HIST1H1E;HIST1H1D;HIST1H1T;HIST1H1A	Histone H1.2;Histone H1.4;Histone H1.3;Histone H1t;Histone H1.1	yes	no	2	0.0004559	80.688	13479000	16580000	31565000	0	1400300	4645600			102	132	103	291;292;293;294;295;296;297;298;299;300;301	322;323;324;325;326;327;328;329;330;331;332;333	324			12
KALAAAGYDVEK	P16403;P10412;P16402;P22492;Q02539	P16403	64	75	HIST1H1C;HIST1H1E;HIST1H1D;HIST1H1T;HIST1H1A	Histone H1.2;Histone H1.4;Histone H1.3;Histone H1t;Histone H1.1	yes	no	3	0.014887	28.206	0	0	0	0	0	0			936	132	962	4025	5296	5296			1
EFDELNPSAQR	P16615-5;P16615-2;P16615-3;P16615-4;P16615	P16615-5	656	666	ATP2A2	Sarcoplasmic/endoplasmic reticulum calcium ATPase 2	yes	no	2	0.0062085	63.283	0	0	0	0	0	0			373	133	385	1321	1572	1572			1
NAENAIEALKEYEPEMGK	P16615-5;P16615-2;P16615-3;P16615-4;P16615;O14983-2;O14983	P16615-5	111	128	ATP2A2;ATP2A1	Sarcoplasmic/endoplasmic reticulum calcium ATPase 2;Sarcoplasmic/endoplasmic reticulum calcium ATPase 1	yes	no	3	0.026733	32.55	0	0	0	0	0	0			1308	133	1358	6003	8179	8179			1
NMLFSGTNIAAGK	P16615-5;P16615-2;P16615-3;P16615-4;P16615;O14983-2;O14983;O14983-3	P16615-5	206	218	ATP2A2;ATP2A1	Sarcoplasmic/endoplasmic reticulum calcium ATPase 2;Sarcoplasmic/endoplasmic reticulum calcium ATPase 1	yes	no	2	0.0042191	60.398	0	0	0	0	0	0			1371	133	1425	6289	8528	8528			1
VGEATETALTCLVEK	P16615-5;P16615-2;P16615-3;P16615-4;P16615;Q93084-4;Q93084-2;Q93084-3;Q93084-7;Q93084;Q93084-6;Q93084-5	P16615-5	437	451	ATP2A2;ATP2A3	Sarcoplasmic/endoplasmic reticulum calcium ATPase 2;Sarcoplasmic/endoplasmic reticulum calcium ATPase 3	yes	no	2	0.0030212	63.091	0	0	0	0	0	0			2009	133	2090	9368	12745	12745			1
DNNLLGR	P17066;P0DMV9;P0DMV8;P0DMV8-2	P0DMV9	452	458	HSPA6;HSPA1B;HSPA1A	Heat shock 70 kDa protein 6;Heat shock 70 kDa protein 1B;Heat shock 70 kDa protein 1A	no	no	2	0.024052	89.703	0	0	3015800	0	0	0			284	110;134	293	1000	1198	1198			1
IINEPTAAAIAYGLDR	P17066;P0DMV9;P0DMV8;P0DMV8-2	P0DMV9	172	187	HSPA6;HSPA1B;HSPA1A	Heat shock 70 kDa protein 6;Heat shock 70 kDa protein 1B;Heat shock 70 kDa protein 1A	no	no	2;3	3.308e-13	117.23	1697700	0	30046000	0	0	32112000			836	110;134	857	3540;3541;3542;3543;3544;3545;3546	4637;4638;4639;4640;4641;4642;4643	4642			7
ITITNDK	P17066;P0DMV9;P0DMV8;P0DMV8-2;P11142;P54652	P11142	501	507	HSPA6;HSPA1B;HSPA1A;HSPA8;HSPA2	Heat shock 70 kDa protein 6;Heat shock 70 kDa protein 1B;Heat shock 70 kDa protein 1A;Heat shock cognate 71 kDa protein;Heat shock-related 70 kDa protein 2	no	no	2	2.782e-08	118.69	0	0	13651000	0	0	0			911	115;110;134	937	3981	5249	5249			1
ITITNDKGR	P17066;P0DMV9;P0DMV8;P0DMV8-2;P11142;P54652	P11142	501	509	HSPA6;HSPA1B;HSPA1A;HSPA8;HSPA2	Heat shock 70 kDa protein 6;Heat shock 70 kDa protein 1B;Heat shock 70 kDa protein 1A;Heat shock cognate 71 kDa protein;Heat shock-related 70 kDa protein 2	no	no	2	0.019281	50.607	0	0	0	0	0	0			912	115;110;134	938	3982	5250	5250			0
LLQDFFNGK	P17066;P11142;P11142-2;P54652	P11142	349	357	HSPA6;HSPA8;HSPA2	Heat shock 70 kDa protein 6;Heat shock cognate 71 kDa protein;Heat shock-related 70 kDa protein 2	no	no	2	1.8089e-15	129.4	1919900	1989600	8944700	0	0	9978700			1126	115;134	1156	5064;5065;5066;5067	6796;6797;6798;6799	6799			4
VEILANDQGNR	P17066;P48741	P17066	28	38	HSPA6;HSPA7	Heat shock 70 kDa protein 6;Putative heat shock 70 kDa protein 7	yes	no	2	1.7955e-38	143.86	6130500	4649300	24500000	0	0	20990000			1984	134	2065	9298;9299;9300;9301;9302;9303;9304;9305;9306	12667;12668;12669;12670;12671;12672;12673;12674;12675;12676;12677;12678	12670			12
ATAGDTHLGGEDFDNR	P17066;P48741;P0DMV9;P0DMV8;P0DMV8-2	P0DMV9	221	236	HSPA6;HSPA7;HSPA1B;HSPA1A	Heat shock 70 kDa protein 6;Putative heat shock 70 kDa protein 7;Heat shock 70 kDa protein 1B;Heat shock 70 kDa protein 1A	no	no	3	5.4802e-09	86.378	0	0	19147000	0	0	0			189	110;134	194	637;638;639;640;641	779;780;781;782;783;784	780			6
FEELCSDLFR	P17066;P48741;P0DMV9;P0DMV8;P0DMV8-2	P0DMV9	302	311	HSPA6;HSPA7;HSPA1B;HSPA1A	Heat shock 70 kDa protein 6;Putative heat shock 70 kDa protein 7;Heat shock 70 kDa protein 1B;Heat shock 70 kDa protein 1A	no	no	2	1.0913e-45	148.05	0	0	5339500	0	0	5828400			523	110;134	541	1878;1879;1880	2283;2284;2285	2284			3
STLEPVEK	P17066;P48741;P0DMV9;P0DMV8;P0DMV8-2	P0DMV9	312	319	HSPA6;HSPA7;HSPA1B;HSPA1A	Heat shock 70 kDa protein 6;Putative heat shock 70 kDa protein 7;Heat shock 70 kDa protein 1B;Heat shock 70 kDa protein 1A	no	no	2	0.033242	66.073	0	0	0	0	0	0			1763	110;134	1830	8324	11276	11276			1
TTPSYVAFTDTER	P17066;P48741;P0DMV9;P0DMV8;P0DMV8-2;P11142;P11142-2;P54652	P11142	37	49	HSPA6;HSPA7;HSPA1B;HSPA1A;HSPA8;HSPA2	Heat shock 70 kDa protein 6;Putative heat shock 70 kDa protein 7;Heat shock 70 kDa protein 1B;Heat shock 70 kDa protein 1A;Heat shock cognate 71 kDa protein;Heat shock-related 70 kDa protein 2	no	no	2	2.862e-10	104.79	4403600	6994100	29852000	0	0	20211000			1925	115;110;134	2000	8958;8959;8960;8961;8962;8963;8964;8965;8966;8967	12070;12071;12072;12073;12074;12075;12076;12077;12078;12079	12071			9
FLESLPEEEQQR	P17480-2;P17480	P17480-2	324	335	UBTF	Nucleolar transcription factor 1	yes	no	2	5.7181e-10	114.5	0	0	0	0	0	0			553	135	572	2069;2070;2071	2597;2598;2599	2599			3
HPELNISEEGITK	P17480-2;P17480	P17480-2	230	242	UBTF	Nucleolar transcription factor 1	yes	no	3	1.9865e-07	91.914	0	0	1361000	0	0	0			766	135	787	3040;3041;3042	3945;3946;3947	3945			3
MVEIGSR	P17480-2;P17480	P17480-2	560	566	UBTF	Nucleolar transcription factor 1	yes	no	2	0.0086788	103.29	0	0	0	0	0	0			1303	135	1353	5993	8169	8169			1
QLQEERPELSESELTR	P17480-2;P17480	P17480-2	387	402	UBTF	Nucleolar transcription factor 1	yes	no	3	5.3341e-53	117.4	0	0	0	0	0	0			1505	135	1567	6809;6810;6811;6812	9150;9151;9152;9153;9154	9150			5
YIQDFQR	P17480-2;P17480	P17480-2	161	167	UBTF	Nucleolar transcription factor 1	yes	no	2	0.026991	88.734	0	0	0	0	0	0			2199	135	2288	10101	13649	13649			1
ENFCNIHVSLVPQPSSTGEQK	P17812	P17812	173	193	CTPS1	CTP synthase 1	yes	yes	3	2.2833e-12	86.748	0	0	0	0	0	0			449	136	464	1611;1612	1934;1935	1935			2
GIIASSVGTILK	P17812	P17812	17	28	CTPS1	CTP synthase 1	yes	yes	2	0.0055396	58.37	0	0	0	0	0	0			663	136	682	2549	3274	3274			1
GLGLSPDLVVCR	P17812	P17812	206	217	CTPS1	CTP synthase 1	yes	yes	2	9.9159e-05	77.677	0	0	0	0	0	0			679	136	698	2580;2581;2582	3305;3306;3307	3305			3
FSDSYASVIK	P17812;P17812-2	P17812	310	319	CTPS1	CTP synthase 1	yes	no	2	0.00964	65.305	0	0	0	0	0	0			570	136	589	2108;2109	2636;2637	2636			2
IQAIAWAR	P17812;P17812-2	P17812	382	389	CTPS1	CTP synthase 1	yes	no	2	0.023316	90.986	0	0	0	0	0	0			887	136	913	3848;3849	5031;5032	5031			2
KLYGDADYLEER	P17812;P17812-2	P17812	466	477	CTPS1	CTP synthase 1	yes	no	3	2.9955e-05	59.227	0	0	0	0	0	0			959	136	986	4095	5389	5389			1
LLETCSIALVGK	P17812;P17812-2	P17812	295	306	CTPS1	CTP synthase 1	yes	no	2	0.00040031	71.349	0	0	0	0	0	0			1112	136	1141	5023	6755	6755			1
YIDSADLEPITSQEEPVR	P17812;P17812-2	P17812	336	353	CTPS1	CTP synthase 1	yes	no	2;3	0.00010929	62.89	0	0	0	0	0	0			2196	136	2285	10089;10090	13635;13636	13635			2
GQLESIVENIR	P17858;P17858-2	P17858	475	485	PFKL	ATP-dependent 6-phosphofructokinase, liver type	yes	no	2	9.1217e-05	94.692	0	0	0	0	0	0			703	137	722	2661;2662;2663	3398;3399;3400	3399			3
IMEVIDAITTTAQSHQR	P17858;P17858-2	P17858	185	201	PFKL	ATP-dependent 6-phosphofructokinase, liver type	yes	no	3	0.0058631	50.079	0	0	0	0	0	0			869	137	895	3808	4991	4991			1
TNVLGHLQQGGAPTPFDR	P17858;P17858-2	P17858	655	672	PFKL	ATP-dependent 6-phosphofructokinase, liver type	yes	no	3	9.0003e-10	70.335	0	0	0	0	0	0			1884	137	1956	8814	11906	11906			1
AIGVLTSGGDAQGMNAAVR	P17858;Q01813	P17858	17	35	PFKL;PFKP	ATP-dependent 6-phosphofructokinase, liver type;ATP-dependent 6-phosphofructokinase, platelet type	no	no	2;3	0.0070778	72.958	0	0	0	0	0	0			89	137;262	89	258;259;260	288;289;290	288			3
IALTDNALIAR	P18124	P18124	167	177	RPL7	60S ribosomal protein L7	yes	yes	2	0.0042568	65.305	0	0	2774100	0	0	0			779	138	800	3377;3378;3379	4458;4459;4460	4458			3
ELTPQVVSAAR	P18206-2;P18206	P18206-2	670	680	VCL	Vinculin	yes	no	2	0.031296	44.863	0	0	0	0	0	0			438	139	453	1565	1880	1880			1
STVEGIQASVK	P18206-2;P18206	P18206-2	656	666	VCL	Vinculin	yes	no	2	0.025168	55.549	0	0	0	0	0	0			1771	139	1839	8368	11332	11332			1
EVFEDAAEIR	P19338	P19338	411	420	NCL	Nucleolin	yes	yes	2	0.00964	65.305	0	1459100	0	0	0	0			488	140	506	1741;1742;1743	2086;2087;2088	2086			3
GFGFVDFNSEEDAK	P19338	P19338	611	624	NCL	Nucleolin	yes	yes	2	2.7258e-05	79.693	0	0	0	0	0	0			631	140	650	2374;2375;2376	3045;3046;3047	3046			3
GLSEDTTEETLKESFDGSVR	P19338	P19338	578	597	NCL	Nucleolin	yes	yes	3	0.00067471	58.997	0	0	0	0	0	0			685	140	704	2594;2595	3319;3320	3320			2
NDLAVVDVR	P19338	P19338	334	342	NCL	Nucleolin	yes	yes	2	0.019521	66.692	0	0	0	0	0	0			1318	140	1368	6031;6032	8213;8214	8214			2
ATCAPQHGAPGPGPADASK	P21333-2;P21333	P21333-2	2533	2551	FLNA	Filamin-A	yes	no	3	0.028912	30.767	0	0	1477000	0	0	0			190	141	195	642	785	785			1
IANLQTDLSDGLR	P21333-2;P21333	P21333-2	64	76	FLNA	Filamin-A	yes	no	2	0.00018187	73.067	0	0	0	1430800	0	0			780	141	801	3380	4461	4461			1
VAQPTITDNKDGTVTVR	P21333-2;P21333	P21333-2	1807	1823	FLNA	Filamin-A	yes	no	3	0.019057	41.871	1736200	0	0	1462800	0	0			1965	141	2044	9103;9104	12226;12227	12227			2
VEPGLGADNSVVR	P21333-2;P21333	P21333-2	1020	1032	FLNA	Filamin-A	yes	no	2	0.0063613	60.434	916710	710330	1176000	1192000	0	0			1988	141	2069	9313;9314;9315;9316	12685;12686;12687;12688	12688			4
VNVGAGSHPNK	P21333-2;P21333	P21333-2	761	771	FLNA	Filamin-A	yes	no	3	0.00048754	56.359	716350	0	0	741430	0	0			2091	141	2177	9596;9597	12992;12993	12992			2
IQQNTFTR	P21333-2;P21333;Q14315-2;Q14315;O75369-5;O75369-4;O75369-6;O75369-3;O75369-2;O75369-9;O75369;O75369-8	P21333-2	44	51	FLNA;FLNC;FLNB	Filamin-A;Filamin-C;Filamin-B	no	no	2	0.026097	77.923	0	0	0	1369400	0	0			894	141;62	920	3879	5106	5106			1
AAGFKDPLLASGTDGVGTK	P22102	P22102	481	499	GART	Trifunctional purine biosynthetic protein adenosine-3;Phosphoribosylamine--glycine ligase;Phosphoribosylformylglycinamidine cyclo-ligase;Phosphoribosylglycinamide formyltransferase	yes	yes	3	0.015049	38.878	0	0	0	0	0	0			8	142	8	20	22	22			1
MLNIHPSLLPSFK	P22102	P22102	911	923	GART	Trifunctional purine biosynthetic protein adenosine-3;Phosphoribosylamine--glycine ligase;Phosphoribosylformylglycinamidine cyclo-ligase;Phosphoribosylglycinamide formyltransferase	yes	yes	3	0.012371	26.627	0	0	0	0	0	0			1284	142	1323	5857	8002	8002			1
AVQEIMQEK	P22102;P22102-2	P22102	170	178	GART	Trifunctional purine biosynthetic protein adenosine-3;Phosphoribosylamine--glycine ligase;Phosphoribosylformylglycinamidine cyclo-ligase;Phosphoribosylglycinamide formyltransferase	yes	no	2	0.016679	69.423	0	0	0	0	0	0			205	142	210	682;683	825;826	826			2
QVLVAPGNAGTACSEK	P22102;P22102-2	P22102	29	44	GART	Trifunctional purine biosynthetic protein adenosine-3;Phosphoribosylamine--glycine ligase;Phosphoribosylformylglycinamidine cyclo-ligase;Phosphoribosylglycinamide formyltransferase	yes	no	2	0.0093185	57.836	0	0	0	0	0	0			1556	142	1620	7017;7018	9408;9409	9409			2
SAGVQCFGPTAEAAQLESSKR	P22102;P22102-2	P22102	88	108	GART	Trifunctional purine biosynthetic protein adenosine-3;Phosphoribosylamine--glycine ligase;Phosphoribosylformylglycinamidine cyclo-ligase;Phosphoribosylglycinamide formyltransferase	yes	no	3	0.00045204	35.036	0	0	0	0	0	0			1600	142	1664	7452;7453	10007;10008	10008			2
AENYDIPSADR	P22314-2;P22314	P22314-2	830	840	UBA1	Ubiquitin-like modifier-activating enzyme 1	yes	no	2	0.022326	52.79	0	0	0	0	0	0			53	143	53	151	174	174			1
ALPAVQQNNLDEDLIR	P22314-2;P22314	P22314-2	329	344	UBA1	Ubiquitin-like modifier-activating enzyme 1	yes	no	2	9.2561e-13	97.734	0	0	0	0	0	0			125	143	128	380;381	446;447	447			2
ALPAVQQNNLDEDLIRK	P22314-2;P22314	P22314-2	329	345	UBA1	Ubiquitin-like modifier-activating enzyme 1	yes	no	3	0.029603	23.635	0	0	0	0	0	0			126	143	129	382	448	448			1
DNPGVVTCLDEAR	P22314-2;P22314	P22314-2	187	199	UBA1	Ubiquitin-like modifier-activating enzyme 1	yes	no	2	2.2268e-07	93.345	0	0	0	0	0	0			285	143	294	1001;1002	1199;1200	1200			2
LAGTQPLEVLEAVQR	P22314-2;P22314	P22314-2	639	653	UBA1	Ubiquitin-like modifier-activating enzyme 1	yes	no	2;3	3.6509e-19	112.13	0	0	1161400	0	0	0			987	143	1014	4252;4253;4254	5618;5619;5620	5620			3
LKSDTAAAAVR	P22314-2;P22314	P22314-2	487	497	UBA1	Ubiquitin-like modifier-activating enzyme 1	yes	no	3	0.013015	31.185	0	0	0	0	0	0			1087	143	1116	4932	6613	6613			1
LQTSSVLVSGLR	P22314-2;P22314	P22314-2	30	41	UBA1	Ubiquitin-like modifier-activating enzyme 1	yes	no	2	0.0059021	56.404	0	0	0	0	0	0			1179	143	1212	5247;5248	7015;7016	7016			2
NEEDAAELVALAQAVNAR	P22314-2;P22314	P22314-2	311	328	UBA1	Ubiquitin-like modifier-activating enzyme 1	yes	no	3	0.0066931	34.094	0	0	0	0	0	0			1323	143	1373	6062	8265	8265			1
NGSEADIDEGLYSR	P22314-2;P22314	P22314-2	4	17	UBA1	Ubiquitin-like modifier-activating enzyme 1	yes	no	2	0.0146	55.426	0	0	0	0	0	0			1334	143	1384	6102	8309	8309			1
YDGQVAVFGSDLQEK	P22314-2;P22314	P22314-2	411	425	UBA1	Ubiquitin-like modifier-activating enzyme 1	yes	no	2	0.0015422	86.313	0	0	0	0	0	0			2159	143	2247	9878	13317	13317			1
TFIAIKPDGVQR	P22392;P15531;P15531-2;P22392-2	P22392	7	18	NME2;NME1	Nucleoside diphosphate kinase B;Nucleoside diphosphate kinase A	yes	no	3	0.00042198	67.153	0	0	2903700	0	0	0			1824	130	1893	8564;8565	11556;11557	11557			2
VMLGETNPADSKPGTIR	P22392;P15531;P15531-2;P22392-2;O60361	P22392	89	105	NME2;NME1;NME2P1	Nucleoside diphosphate kinase B;Nucleoside diphosphate kinase A;Putative nucleoside diphosphate kinase	yes	no	3	0.0040815	52.453	0	0	0	0	0	0			2087	130	2173	9584;9585	12980;12981	12981			2
GGGGNFGPGPGSNFR	P22626-2;P22626	P22626-2	202	216	HNRNPA2B1	Heterogeneous nuclear ribonucleoproteins A2/B1	yes	no	2	4.0679e-09	92.611	0	0	2060700	0	0	0			641	145	660	2433;2434;2435	3123;3124;3125	3124			3
QEMQEVQSSR	P22626-2;P22626	P22626-2	179	188	HNRNPA2B1	Heterogeneous nuclear ribonucleoproteins A2/B1	yes	no	2	0.010096	64.654	0	0	0	0	0	0			1465	145	1526	6646	8945	8945			1
GSGVNAAGDGTIR	P22735	P22735	94	106	TGM1	Protein-glutamine gamma-glutamyltransferase K	yes	yes	2	0.0082857	49.35	0	0	0	0	0	0			716	146	737	2739	3497	3497			1
LEGSGLQRPK	P22735;P22735-2	P22735	728	737	TGM1	Protein-glutamine gamma-glutamyltransferase K	yes	no	3	0.00037285	80.688	0	0	0	0	0	0			1031	146	1060	4433;4434	5834;5835	5834			2
FGQGGAGPVGGQGPR	P23246	P23246	667	681	SFPQ	Splicing factor, proline- and glutamine-rich	yes	yes	2	0.0058929	58.699	0	0	0	0	0	0			538	147	557	1968	2377	2377			1
FAQHGTFEYEYSQR	P23246;P23246-2	P23246	480	493	SFPQ	Splicing factor, proline- and glutamine-rich	yes	no	3	0.0012317	54.276	0	0	0	0	0	0			507	147	525	1815	2183	2183			1
FATHAAALSVR	P23246;P23246-2	P23246	366	376	SFPQ	Splicing factor, proline- and glutamine-rich	yes	no	3	0.014292	38.27	0	0	2290800	0	0	0			513	147	531	1839;1840;1841;1842	2215;2216;2217;2218	2216			4
GIVEFASKPAAR	P23246;P23246-2	P23246	414	425	SFPQ	Splicing factor, proline- and glutamine-rich	yes	no	2	0.00026929	72.928	0	0	0	0	0	0			670	147	689	2560;2561	3285;3286	3285			2
LFVGNLPADITEDEFKR	P23246;P23246-2	P23246	299	315	SFPQ	Splicing factor, proline- and glutamine-rich	yes	no	3	8.4719e-28	94.487	0	0	0	0	0	4809800			1050	147	1079	4504;4505;4506;4507;4508	5926;5927;5928;5929;5930	5926			5
PVIVEPLEQLDDEDGLPEK	P23246;P23246-2	P23246	444	462	SFPQ	Splicing factor, proline- and glutamine-rich	yes	no	3	0.00011183	65.107	0	0	2961100	0	0	0			1441	147	1501	6570	8849	8849			1
DPFYMGLYQKR	P23368-2;P23368	P23368-2	215	225	ME2	NAD-dependent malic enzyme, mitochondrial	yes	no	2	0.0051742	40.432	0	0	0	0	0	0			289	148	298	1013;1014	1212;1213	1213		1;2	0
KQPTPQPPVDCVK	P23490	P23490	6	18	LOR	Loricrin	yes	yes	3	0.00059956	52.265	0	0	0	0	0	0			968	149	995	4131	5427;5428	5428			2
QPTPQPPVDCVK	P23490	P23490	7	18	LOR	Loricrin	yes	yes	2	5.123e-14	117.7	0	0	0	0	0	0			1522	149	1585	6857	9200;9201	9201			2
VPAINVNDSVTK	P23526-2;P23526	P23526-2	147	158	AHCY	Adenosylhomocysteinase	yes	no	2	0.0056475	57.785	0	0	0	0	0	0			2092	150	2178	9598	12994	12994			1
AASIFGGAKPVDTAAR	P23588-2;P23588	P23588-2	318	333	EIF4B	Eukaryotic translation initiation factor 4B	yes	no	3	0.0038561	53.168	0	0	0	0	0	0			23	151	23	47;48	50;51	51			2
AGTVVLDDVELR	P25205	P25205	2	13	MCM3	DNA replication licensing factor MCM3	yes	yes	2	2.3231e-05	81.338	0	0	0	0	0	0			76	152	76	225;226	255;256	255			2
IIKPVLTQESATYIAEEYSR	P25205;P25205-2	P25205	577	596	MCM3	DNA replication licensing factor MCM3	yes	no	3	8.6151e-06	74.662	0	0	0	0	0	0			829	152	850	3516	4611	4611			1
LIVNVNDLR	P25205;P25205-2	P25205	47	55	MCM3	DNA replication licensing factor MCM3	yes	no	2	0.013106	73.26	0	0	0	0	0	0			1079	152	1108	4808;4809	6350;6351	6350			2
TPMENIGLQDSLLSR	P25205;P25205-2	P25205	464	478	MCM3	DNA replication licensing factor MCM3	yes	no	2	0.010678	54.143	0	0	0	0	0	0			1892	152	1964	8833	11925	11925			1
TVLIACNVK	P25205;P25205-2	P25205	258	266	MCM3	DNA replication licensing factor MCM3	yes	no	2	0.028301	58.917	0	0	0	0	0	0			1935	152	2010	8982	12094	12094			1
VQVVGTYR	P25205;P25205-2	P25205	235	242	MCM3	DNA replication licensing factor MCM3	yes	no	2	0.022104	94.662	0	0	0	0	0	0			2111	152	2197	9684;9685;9686	13096;13097;13098	13097			3
YVLCTAPR	P25205;P25205-2	P25205	357	364	MCM3	DNA replication licensing factor MCM3	yes	no	2	0.024473	81.784	0	0	0	0	0	0			2234	152	2324	10241;10242	13813;13814	13814			2
AGEVQEPELR	P25311	P25311	242	251	AZGP1	Zinc-alpha-2-glycoprotein	yes	yes	2	5.7128e-07	112.84	0	0	851050	0	1875500	0			68	153	68	201;202;203;204;205;206;207	228;229;230;231;232;233;234	229			7
AYLEEECPATLR	P25311	P25311	180	191	AZGP1	Zinc-alpha-2-glycoprotein	yes	yes	2	5.8081e-39	143.86	0	0	0	0	0	0			213	153	218	699;700;701;702;703;704	843;844;845;846;847;848;849	843			7
AYLEEECPATLRK	P25311	P25311	180	192	AZGP1	Zinc-alpha-2-glycoprotein	yes	yes	3	0.00021521	64.65	0	0	0	0	0	0			214	153	219	705;706;707;708;709	850;851;852;853;854	852			5
QDPPSVVVTSHQAPGEK	P25311	P25311	204	220	AZGP1	Zinc-alpha-2-glycoprotein	yes	yes	3	1.3427e-09	88.992	0	0	0	0	0	0			1458	153	1518	6625;6626;6627	8923;8924;8925	8925			3
STESLQANVQR	P26373	P26373	106	116	RPL13	60S ribosomal protein L13	yes	yes	2	2.7261e-06	103.56	0	1246300	2644200	0	0	924300			1761	154	1828	8318;8319;8320;8321;8322	11270;11271;11272;11273;11274	11273			5
EAAEQDVEK	P26373;P26373-2	P26373	201	209	RPL13	60S ribosomal protein L13	yes	no	2	0.013106	73.26	870600	0	0	0	0	0			336	154	348	1166	1391	1391			1
LATQLTGPVMPVR	P26373;P26373-2	P26373	146	158	RPL13	60S ribosomal protein L13	yes	no	2	0.00037027	70.1	1540700	0	2177500	0	0	0			1003	154	1030	4348;4349	5740;5741	5741			2
ALIAAQYSGAQVR	P26641;P26641-2	P26641	18	30	EEF1G	Elongation factor 1-gamma	yes	no	2	2.5858e-34	138.66	1764700	1421200	2526000	0	0	0			117	155	118	352;353;354;355;356;357	418;419;420;421;422;423	423			6
KLDPGSEETQTLVR	P26641;P26641-2	P26641	401	414	EEF1G	Elongation factor 1-gamma	yes	no	3	0.00089854	35.1	0	0	0	0	0	0			954	155	981	4075;4076;4077	5352;5353;5354	5352			2
AVTEQGAELSNEER	P27348	P27348	28	41	YWHAQ	14-3-3 protein theta	yes	yes	2	0.0017326	63.408	0	0	0	0	0	0			206	156	211	684	827	827			1
EATAGNPGGQTVR	P27708	P27708	359	371	CAD	CAD protein;Glutamine-dependent carbamoyl-phosphate synthase;Aspartate carbamoyltransferase;Dihydroorotase	yes	yes	2	0.00086077	68.893	0	0	1872800	4245200	2190900	2291400			344	158	356	1190;1191;1192;1193	1416;1417;1418;1419	1418			4
FLSSAAAVSK	P27708	P27708	1110	1119	CAD	CAD protein;Glutamine-dependent carbamoyl-phosphate synthase;Aspartate carbamoyltransferase;Dihydroorotase	yes	yes	2	0.0037857	73.985	0	0	0	4386200	0	0			558	158	577	2084	2612	2612			1
GEVRPELGSR	P27708	P27708	1658	1667	CAD	CAD protein;Glutamine-dependent carbamoyl-phosphate synthase;Aspartate carbamoyltransferase;Dihydroorotase	yes	yes	3	0.0050435	52.391	0	0	0	1903700	1343200	1574100			627	158	646	2362;2363;2364	3033;3034;3035	3034			3
ILALDCGLK	P27708	P27708	178	186	CAD	CAD protein;Glutamine-dependent carbamoyl-phosphate synthase;Aspartate carbamoyltransferase;Dihydroorotase	yes	yes	2	0.024521	61.999	0	0	1804700	0	0	0			845	158	870	3743	4921	4921			1
LSLDDLLQR	P27708	P27708	1723	1731	CAD	CAD protein;Glutamine-dependent carbamoyl-phosphate synthase;Aspartate carbamoyltransferase;Dihydroorotase	yes	yes	2	0.024389	62.107	0	0	0	3551400	0	0			1194	158	1227	5318	7132	7132			1
MAEIGEHVAPSEAANSLEQAQAAAER	P27708	P27708	522	547	CAD	CAD protein;Glutamine-dependent carbamoyl-phosphate synthase;Aspartate carbamoyltransferase;Dihydroorotase	yes	yes	3	8.8574e-09	64.028	0	0	0	3486000	0	4416000			1258	158	1293	5812;5813	7957;7958	7957			2
VFNTGGAPR	P27708	P27708	169	177	CAD	CAD protein;Glutamine-dependent carbamoyl-phosphate synthase;Aspartate carbamoyltransferase;Dihydroorotase	yes	yes	2	0.0096989	77.058	0	0	1199600	3146300	0	0			2000	158	2081	9339;9340	12716;12717	12716			2
VLGTSPEAIDSAENR	P27708	P27708	1034	1048	CAD	CAD protein;Glutamine-dependent carbamoyl-phosphate synthase;Aspartate carbamoyltransferase;Dihydroorotase	yes	yes	2	0.0011898	72.652	0	0	3469300	2996400	0	0			2064	158	2146	9522;9523;9524;9525	12915;12916;12917;12918	12916			4
VLSEPNPR	P27708	P27708	239	246	CAD	CAD protein;Glutamine-dependent carbamoyl-phosphate synthase;Aspartate carbamoyltransferase;Dihydroorotase	yes	yes	2	0.024687	81.297	0	0	0	1485700	0	0			2070	158	2152	9532	12925	12925			1
DGVLTLANNVTPAK	P27816-6;P27816	P27816-6	561	574	MAP4	Microtubule-associated protein 4	yes	no	2	0.033886	41.283	0	0	0	1261900	0	0			254	159	262	888	1084	1084			1
LATNTSAPDLK	P27816-6;P27816;P27816-5;P27816-4;P27816-2	P27816-6	923	933	MAP4	Microtubule-associated protein 4	yes	no	2	0.03528	44.203	0	0	0	2080400	0	0			1002	159	1029	4347	5739	5739			1
TTTAAAVASTGPSSR	P27816-6;P27816;P27816-5;P27816-4;P27816-2	P27816-6	810	824	MAP4	Microtubule-associated protein 4	yes	no	2	0.016945	51.841	0	0	0	0	0	0			1926	159	2001	8968;8969	12080;12081	12081			2
APVPTGEVYFADSFDR	P27824;P27824-2	P27824	62	77	CANX	Calnexin	yes	no	2	0.00090877	75.78	0	0	0	0	0	0			157	160	161	516;517	624;625	624			2
AEEDEILNR	P27824;P27824-2;P27824-3	P27824	574	582	CANX	Calnexin	yes	no	2	0.00081218	107.66	0	0	0	0	0	0			49	160	49	139;140;141	162;163;164	162			3
EIEDPEDR	P27824;P27824-2;P27824-3	P27824	275	282	CANX	Calnexin	yes	no	2	0.035187	65.038	0	0	0	0	0	0			390	160	403	1388	1670	1670			1
IPDPEAVKPDDWDEDAPAK	P27824;P27824-2;P27824-3	P27824	293	311	CANX	Calnexin	yes	no	3	0.015597	38.453	0	0	0	0	0	0			882	160	908	3838	5021	5021			1
IVDDWANDGWGLKK	P27824;P27824-2;P27824-3	P27824	446	459	CANX	Calnexin	yes	no	3	0.0037032	38.799	0	0	0	0	0	0			925	160	951	4005	5275	5275			1
KIPNPDFFEDLEPFR	P27824;P27824-2;P27824-3	P27824	401	415	CANX	Calnexin	yes	no	3	0.003458	45.434	0	0	0	0	0	0			951	160	978	4069;4070;4071	5346;5347;5348	5348			3
PVIDNPNYK	P27824;P27824-2;P27824-3	P27824	372	380	CANX	Calnexin	yes	no	2	0.010539	85.064	0	0	0	0	0	0			1440	160	1500	6567;6568;6569	8846;8847;8848	8846			3
TPYTIMFGPDK	P27824;P27824-2;P27824-3	P27824	183	193	CANX	Calnexin	yes	no	2	0.00084913	73.067	0	0	0	0	0	0			1897	160	1969	8848	11941	11941			1
FASEIAGVDDLGTTGR	P28331-3;P28331-4;P28331-5;P28331;P28331-2	P28331-3	74	89	NDUFS1	NADH-ubiquinone oxidoreductase 75 kDa subunit, mitochondrial	yes	no	2	9.8321e-61	121.08	0	0	0	0	0	0			509	161	527	1817;1818;1819	2185;2186;2187	2187			3
FEAPLFNAR	P28331-3;P28331-4;P28331-5;P28331;P28331-2	P28331-3	298	306	NDUFS1	NADH-ubiquinone oxidoreductase 75 kDa subunit, mitochondrial	yes	no	2	8.3234e-06	89.55	0	0	0	0	0	0			520	161	538	1874;1875	2279;2280	2279			0
IASQVAALDLGYKPGVEAIR	P28331-3;P28331-4;P28331-5;P28331;P28331-2	P28331-3	408	427	NDUFS1	NADH-ubiquinone oxidoreductase 75 kDa subunit, mitochondrial	yes	no	3	2.0928e-07	78.088	0	0	0	0	0	0			784	161	805	3384;3385	4465;4466	4465			2
ILQDIASGSHPFSQVLK	P28331-3;P28331-4;P28331-5;P28331;P28331-2	P28331-3	340	356	NDUFS1	NADH-ubiquinone oxidoreductase 75 kDa subunit, mitochondrial	yes	no	3	0.027771	33.307	0	0	0	0	0	0			858	161	884	3774	4956	4956			1
KPMVVLGSSALQR	P28331-3;P28331-4;P28331-5;P28331;P28331-2	P28331-3	360	372	NDUFS1	NADH-ubiquinone oxidoreductase 75 kDa subunit, mitochondrial	yes	no	3	0.025033	21.942	0	0	0	0	0	0			961	161	988	4101	5395	5395			1
NDGAAILAAVSSIAQK	P28331-3;P28331-4;P28331-5;P28331;P28331-2	P28331-3	373	388	NDUFS1	NADH-ubiquinone oxidoreductase 75 kDa subunit, mitochondrial	yes	no	2	1.1844e-08	90.614	0	0	0	0	0	0			1316	161	1366	6028;6029	8210;8211	8210			2
NRLEEVSPNLVR	P28331-3;P28331-4;P28331-5;P28331;P28331-2	P28331-3	533	544	NDUFS1	NADH-ubiquinone oxidoreductase 75 kDa subunit, mitochondrial	yes	no	3	0.0011331	55.98	0	0	0	0	0	0			1400	161	1459	6445	8701	8701			1
IIALDGDTK	P29401;P29401-2	P29401	335	343	TKT	Transketolase	yes	no	2	0.0082018	56.729	0	0	0	0	0	0			823	162	844	3498	4593	4593			0
ILATPPQEDAPSVDIANIR	P29401;P29401-2	P29401	284	302	TKT	Transketolase	yes	no	2	7.9148e-08	72.089	0	0	0	0	0	0			847	162	872	3746	4924	4924			1
TSRPENAIIYNNNEDFQVGQAK	P29401;P29401-2	P29401	472	493	TKT	Transketolase	yes	no	3	0.021677	28.412	0	0	0	0	0	0			1917	162	1991	8932;8933	12044;12045	12045			2
VLDPFTIKPLDR	P29401;P29401-2	P29401	531	542	TKT	Transketolase	yes	no	3	0.003159	45.915	0	1504800	3310900	0	0	0			2054	162	2136	9488;9489	12881;12882	12882			2
FYQTSVESVDFANAPEESR	P29508-2;P29508	P29508-2	126	144	SERPINB3	Serpin B3	yes	no	2	0.022875	60.448	0	0	0	0	0	0			600	163	619	2293	2959	2959			1
GLVLSGVLHK	P29508-2;P29508	P29508-2	270	279	SERPINB3	Serpin B3	yes	no	2	0.02862	51.854	0	0	0	0	0	0			688	163	707	2613	3338	3338			1
INSWVESQTNEK	P29508-2;P29508;P48594	P29508-2	147	158	SERPINB3;SERPINB4	Serpin B3;Serpin B4	yes	no	2	0.00036907	72.006	0	0	0	0	0	0			880	163	906	3833;3834	5016;5017	5016			2
EAPAEGEAAEPGSPTAAEGEAASAASSTSSPK	P29966	P29966	106	137	MARCKS	Myristoylated alanine-rich C-kinase substrate	yes	yes	3	0.017456	20.174	0	0	0	0	0	0			343	164	355	1189	1415	1415			1
GEAAAERPGEAAVASSPSK	P29966	P29966	12	30	MARCKS	Myristoylated alanine-rich C-kinase substrate	yes	yes	3	0.00010351	65.808	0	0	0	0	0	0			618	164	637	2338;2339;2340;2341	3005;3006;3007;3008	3006			4
GEPAAAAAPEAGASPVEK	P29966	P29966	88	105	MARCKS	Myristoylated alanine-rich C-kinase substrate	yes	yes	2	0.0080349	56.482	0	0	0	0	0	0			625	164	644	2360	3031	3031			1
NNLEALEDFEK	P31025	P31025	140	150	LCN1	Lipocalin-1	yes	yes	2	4.1882e-09	111.61	0	0	0	0	0	0			1379	165	1436	6363;6364;6365	8617;8618;8619	8618			3
TDEPGKYTADGGK	P31025	P31025	89	101	LCN1	Lipocalin-1	yes	yes	3	0.0015291	49.929	0	0	0	0	0	0			1803	165	1871	8488	11471	11471			1
GLSTESILIPR	P31025;Q5VSP4	P31025	156	166	LCN1;LCN1P1	Lipocalin-1;Putative lipocalin 1-like protein 1	yes	no	2	0.00071446	87.308	0	0	0	0	0	0			686	165	705	2596;2597;2598;2599	3321;3322;3323;3324	3321			4
GTNYLADVFEK	P31151	P31151	51	61	S100A7	Protein S100-A7	yes	yes	2	0.0058923	58.37	0	0	0	0	0	0			728	166	749	2814	3615	3615			1
ENFPNFLSACDKK	P31151;Q86SG5	P31151	38	50	S100A7;S100A7A	Protein S100-A7;Protein S100-A7A	yes	no	3	0.029231	22.214	0	0	0	0	0	0			450	166	465	1613	1936	1936			1
ELYDKGGEQAIK	P31689-2;P31689	P31689-2	62	73	DNAJA1	DnaJ homolog subfamily A member 1	yes	no	3	0.0064097	42.426	0	0	0	0	0	0			442	167	457	1591	1912	1912			1
QISQAYEVLSDAK	P31689-2;P31689	P31689-2	47	59	DNAJA1	DnaJ homolog subfamily A member 1	yes	no	2	0.0070427	52.693	0	0	0	0	0	0			1490	167	1552	6774;6775	9111;9112	9111			2
GLPWSCSADEVQR	P31943	P31943	17	29	HNRNPH1	Heterogeneous nuclear ribonucleoprotein H;Heterogeneous nuclear ribonucleoprotein H, N-terminally processed	yes	yes	2	0.036156	40.589	0	0	0	0	0	0			683	168	702	2592	3317	3317			1
HTGPNSPDTANDGFVR	P31943;P55795	P31943	99	114	HNRNPH1;HNRNPH2	Heterogeneous nuclear ribonucleoprotein H;Heterogeneous nuclear ribonucleoprotein H, N-terminally processed;Heterogeneous nuclear ribonucleoprotein H2	yes	no	3	0.013443	45.14	0	0	0	0	0	0			775	168	796	3373	4454	4454			1
STGEAFVQFASQEIAEK	P31943;P55795	P31943	151	167	HNRNPH1;HNRNPH2	Heterogeneous nuclear ribonucleoprotein H;Heterogeneous nuclear ribonucleoprotein H, N-terminally processed;Heterogeneous nuclear ribonucleoprotein H2	yes	no	2	0.0077274	58.674	0	0	0	0	0	0			1762	168	1829	8323	11275	11275			1
FQQAIDSR	P31944	P31944	68	75	CASP14	Caspase-14;Caspase-14 subunit p17, mature form;Caspase-14 subunit p10, mature form;Caspase-14 subunit p20, intermediate form;Caspase-14 subunit p8, intermediate form	yes	yes	2	0.018173	97.798	0	2757600	0	0	0	0			566	169	585	2098;2099	2626;2627	2626			2
KTNPEIQSTLR	P31944	P31944	226	236	CASP14	Caspase-14;Caspase-14 subunit p17, mature form;Caspase-14 subunit p10, mature form;Caspase-14 subunit p20, intermediate form;Caspase-14 subunit p8, intermediate form	yes	yes	3	0.01968	22.781	0	0	0	0	0	0			972	169	999	4158	5487	5487			0
LENLFEALNNK	P31944	P31944	105	115	CASP14	Caspase-14;Caspase-14 subunit p17, mature form;Caspase-14 subunit p10, mature form;Caspase-14 subunit p20, intermediate form;Caspase-14 subunit p8, intermediate form	yes	yes	2	0.015386	48.423	0	0	0	0	0	0			1036	169	1065	4455	5869	5869			1
MAEAELVQEGK	P31944	P31944	213	223	CASP14	Caspase-14;Caspase-14 subunit p17, mature form;Caspase-14 subunit p10, mature form;Caspase-14 subunit p20, intermediate form;Caspase-14 subunit p8, intermediate form	yes	yes	2	2.5856e-20	129.38	0	1210700	0	0	0	0			1257	169	1291;1292	5805;5806;5807;5808;5809;5810;5811	7950;7951;7952;7953;7954;7955;7956	7952	62		7
RDPTAEQFQEELEK	P31944	P31944	54	67	CASP14	Caspase-14;Caspase-14 subunit p17, mature form;Caspase-14 subunit p10, mature form;Caspase-14 subunit p20, intermediate form;Caspase-14 subunit p8, intermediate form	yes	yes	3	0.00014851	49.595	0	0	0	0	0	0			1569	169	1633	7050	9442	9442			1
TNPEIQSTLR	P31944	P31944	227	236	CASP14	Caspase-14;Caspase-14 subunit p17, mature form;Caspase-14 subunit p10, mature form;Caspase-14 subunit p20, intermediate form;Caspase-14 subunit p8, intermediate form	yes	yes	2	0.0089642	66.27	0	0	0	0	0	0			1878	169	1950	8795	11887	11887			1
AVTEQGHELSNEER	P31946-2;P31946	P31946-2	28	41	YWHAB	14-3-3 protein beta/alpha;14-3-3 protein beta/alpha, N-terminally processed	yes	no	3	0.0011989	42.568	0	0	0	0	0	0			207	170	212	685	828	828			1
MEQVNELKEK	P31948-3;P31948	P31948-3	1	10	STIP1	Stress-induced-phosphoprotein 1	yes	no	2	0.00034907	72.321	0	0	0	0	0	0			1266	171	1302;1303	5825;5826;5827	7970;7971;7972	7972	63		3
ALDLDSSCK	P31948-3;P31948;P31948-2	P31948-3	430	438	STIP1	Stress-induced-phosphoprotein 1	yes	no	2	0.030984	56.729	0	0	0	0	0	0			105	171	106	306	338	338			1
ALDLDSSCKEAADGYQR	P31948-3;P31948;P31948-2	P31948-3	430	446	STIP1	Stress-induced-phosphoprotein 1	yes	no	3	1.1761e-21	105.31	0	0	0	0	0	0			106	171	107	307	339	339			1
DPQALSEHLK	P31948-3;P31948;P31948-2	P31948-3	490	499	STIP1	Stress-induced-phosphoprotein 1	yes	no	3	0.020743	31.185	0	0	0	0	0	4452300			290	171	299	1015	1214	1214			1
EAADGYQR	P31948-3;P31948;P31948-2	P31948-3	439	446	STIP1	Stress-induced-phosphoprotein 1	yes	no	2	0.019085	97.071	0	0	0	0	0	964650			335	171	347	1165	1390	1390			1
LAYINPDLALEEK	P31948-3;P31948;P31948-2	P31948-3	328	340	STIP1	Stress-induced-phosphoprotein 1	yes	no	2	8.2932e-06	83	0	0	0	0	0	0			1007	171	1034	4359	5751	5751			1
LILEQMQK	P31948-3;P31948;P31948-2	P31948-3	482	489	STIP1	Stress-induced-phosphoprotein 1	yes	no	2	0.022424	94.407	0	0	0	0	0	6269100			1075	171	1104	4799	6341	6341			1
TLLSDPTYR	P31948-3;P31948;P31948-2	P31948-3	121	129	STIP1	Stress-induced-phosphoprotein 1	yes	no	2	3.1617e-52	136.11	0	0	0	0	0	0			1859	171	1929	8688	11732	11732			1
LASALAPSIYEHEDIKK	P33991	P33991	462	478	MCM4	DNA replication licensing factor MCM4	yes	yes	3	0.011511	36.193	0	0	0	0	0	0			994	172	1021	4317	5700	5700			1
LQESPEDMPAGQTPHTVILFAHNDLVDK	P33991	P33991	354	381	MCM4	DNA replication licensing factor MCM4	yes	yes	4	0.033352	10.516	0	0	0	0	0	0			1167	172	1200	5217	6981	6981			1
LSNKVEAIDVEEAKR	P33991	P33991	749	763	MCM4	DNA replication licensing factor MCM4	yes	yes	4	0.0071405	38.511	0	0	0	0	0	0			1195	172	1228	5319	7133	7133			1
TSVLAAANPIESQWNPK	P33991	P33991	611	627	MCM4	DNA replication licensing factor MCM4	yes	yes	2	0.0068844	59.57	0	0	0	0	0	0			1918	172	1992	8934	12046	12046			1
AGITTTLNSR	P33992	P33992	472	481	MCM5	DNA replication licensing factor MCM5	yes	yes	2	0.011276	62.969	0	0	0	0	0	0			74	173	74	222;223	252;253	252			2
AIACLLFGGSR	P33992	P33992	352	362	MCM5	DNA replication licensing factor MCM5	yes	yes	2	0.028252	45.368	0	0	0	0	0	0			81	173	81	237;238	267;268	268			2
GSSAAGLTASVMR	P33992	P33992	408	420	MCM5	DNA replication licensing factor MCM5	yes	yes	2	0.008952	47.559	0	0	0	0	0	0			722	173	743	2771	3548	3548			1
IPGIIIAASAVR	P33992	P33992	151	162	MCM5	DNA replication licensing factor MCM5	yes	yes	2	4.3384e-14	118.71	0	0	0	0	0	0			883	173	909	3839;3840;3841	5022;5023;5024	5022			3
LAALPNVYEVISK	P33992	P33992	325	337	MCM5	DNA replication licensing factor MCM5	yes	yes	2	0.0060706	55.314	0	0	0	0	0	0			979	173	1006	4222;4223;4224;4225	5588;5589;5590;5591	5589			4
LQELPDAVPHGEMPR	P33992	P33992	229	243	MCM5	DNA replication licensing factor MCM5	yes	yes	3	0.0058644	46.926	0	0	0	0	0	0			1166	173	1199	5211;5212;5213;5214;5215;5216	6975;6976;6977;6978;6979;6980	6976			6
LQPFATEADVEEALR	P33992	P33992	628	642	MCM5	DNA replication licensing factor MCM5	yes	yes	2	0.00084341	96.604	0	0	0	0	0	0			1172	173	1205	5229	6997	6997			1
NTLTNIAMRPGLEGYALPR	P33992	P33992	177	195	MCM5	DNA replication licensing factor MCM5	yes	yes	3	0.0032018	49.224	0	0	0	0	0	0			1417	173	1476	6489	8757	8757			1
QPAEHLQLLEEAAK	P33992	P33992	91	104	MCM5	DNA replication licensing factor MCM5	yes	yes	3	0.00095738	56.569	0	0	0	0	0	0			1517	173	1580	6848;6849;6850	9191;9192;9193	9192			3
SDASPSSIR	P33992	P33992	130	138	MCM5	DNA replication licensing factor MCM5	yes	yes	2	4.6166e-15	125.31	0	0	0	0	0	0			1607	173	1671	7544;7545	10160;10161	10160			2
SFAGAVSPQEEEEFRR	P33992	P33992	309	324	MCM5	DNA replication licensing factor MCM5	yes	yes	3	2.7625e-53	142.1	0	0	0	0	0	0			1637	173	1703	7634;7635;7636;7637;7638;7639	10270;10271;10272;10273;10274;10275	10272			6
SIAPSIFGGTDMKK	P33992	P33992	338	351	MCM5	DNA replication licensing factor MCM5	yes	yes	3	0.0043407	37.555	0	0	0	0	0	0			1660	173	1726	7812;7813;7814	10493;10494;10495	10494			3
VLGIQVDTDGSGR	P33992	P33992	296	308	MCM5	DNA replication licensing factor MCM5	yes	yes	2	7.1812e-08	97.456	0	0	0	0	0	0			2062	173	2144	9513;9514;9515;9516;9517;9518	12906;12907;12908;12909;12910;12911	12908			6
ALKDYALEK	P33993;P33993-2	P33993	2	10	MCM7	DNA replication licensing factor MCM7	yes	no	2	0.0079758	73.233	0	0	0	0	0	0			118	174	119	358	424	424			1
EVVNKDVLDVYIEHR	P33993;P33993-2	P33993	92	106	MCM7	DNA replication licensing factor MCM7	yes	no	3	0.018091	25.823	0	0	0	0	0	0			492	174	510	1757	2102	2102			1
FLQEFYQDDELGKK	P33993;P33993-2	P33993	16	29	MCM7	DNA replication licensing factor MCM7	yes	no	3	2.0502e-06	80.3	0	0	0	0	0	0			555	174	574	2076;2077;2078	2604;2605;2606	2605			3
SPQNQYPAELMR	P33993;P33993-2	P33993	121	132	MCM7	DNA replication licensing factor MCM7	yes	no	2	1.7539e-09	110.14	0	0	0	0	0	0			1722	174	1788	8143;8144;8145	10985;10986;10987	10985			3
YGNQLVR	P33993;P33993-2	P33993	33	39	MCM7	DNA replication licensing factor MCM7	yes	no	2	0.01251	94.669	0	0	0	0	0	0			2185	174	2273	10025	13548	13548			1
CSILAAANPAYGR	P33993;P33993-3	P33993	482	494	MCM7	DNA replication licensing factor MCM7	yes	no	2	0.0022823	80.239	0	0	0	0	0	0			230	174	236	752;753	917;918	917			2
DSLLGDKGQTAR	P33993;P33993-3	P33993	642	653	MCM7	DNA replication licensing factor MCM7	yes	no	3	0.0016361	49.423	0	0	0	0	0	0			307	174	316	1053	1255;1256	1256			2
GSSGVGLTAAVLR	P33993;P33993-3	P33993	408	420	MCM7	DNA replication licensing factor MCM7	yes	no	2	6.9171e-06	84.054	0	0	0	0	0	0			725	174	746	2792;2793	3581;3582	3582			2
LAASIAPEIYGHEDVKK	P33993;P33993-3	P33993	336	352	MCM7	DNA replication licensing factor MCM7	yes	no	3;4	0.014	25.558	0	0	0	0	0	0			981	174	1008	4232;4233	5598;5599	5599			2
MVDVVEKEDVNEAIR	P33993;P33993-3	P33993	621	635	MCM7	DNA replication licensing factor MCM7	yes	no	3	2.185e-15	101.62	0	0	0	0	0	0			1302	174	1351;1352	5988;5989;5990;5991;5992	8164;8165;8166;8167;8168	8168	64		5
QPPSQFEPLDMK	P33993;P33993-3	P33993	546	557	MCM7	DNA replication licensing factor MCM7	yes	no	2	0.0012556	68.893	0	0	0	0	0	0			1521	174	1584	6856	9199	9199			1
SLEQNIQLPAALLSR	P33993;P33993-3	P33993	500	514	MCM7	DNA replication licensing factor MCM7	yes	no	2	0.0073469	67.776	0	0	0	0	0	0			1682	174	1748	7940	10678	10678			1
SQLLSYIDR	P33993;P33993-3	P33993	388	396	MCM7	DNA replication licensing factor MCM7	yes	no	2	6.2288e-06	114.89	0	0	0	0	0	0			1734	174	1800	8164;8165	11007;11008	11007			2
TQRPADVIFATVR	P33993;P33993-3	P33993	654	666	MCM7	DNA replication licensing factor MCM7	yes	no	3	1.1761e-10	83.243	0	0	0	0	0	0			1902	174	1974	8859;8860	11952;11953	11953			2
FSEAEQR	P33993;P33993-3;P33993-2	P33993	677	683	MCM7	DNA replication licensing factor MCM7	yes	no	2	5.6786e-14	128.75	0	0	0	0	0	0			571	174	590	2110;2111	2638;2639	2638			2
MQEHSDQVPVGNIPR	P33993;P33993-3;P33993-2	P33993	237	251	MCM7	DNA replication licensing factor MCM7	yes	no	3	0.016457	38.028	0	0	0	0	0	0			1289	174	1330	5883;5884	8028;8029	8029			2
QVVQGLLSETYLEAHR	P33993;P33993-3;P33993-2	P33993	287	302	MCM7	DNA replication licensing factor MCM7	yes	no	3	5.7073e-06	66.965	0	0	0	0	0	0			1560	174	1624	7025;7026	9416;9417	9416			2
SEDDESGAGELTR	P33993;P33993-3;P33993-2	P33993	309	321	MCM7	DNA replication licensing factor MCM7	yes	no	2	1.7891e-06	90.685	0	0	0	0	0	0			1618	174	1684	7576;7577;7578	10197;10198;10199	10197			3
SEDDESGAGELTREELR	P33993;P33993-3;P33993-2	P33993	309	325	MCM7	DNA replication licensing factor MCM7	yes	no	3	0.013097	44.807	0	0	0	0	0	0			1619	174	1685	7579;7580	10200;10201	10200			2
SITVLVEGENTR	P33993;P33993-3;P33993-2	P33993	252	263	MCM7	DNA replication licensing factor MCM7	yes	no	2	0.00021162	105.98	0	0	0	0	0	0			1669	174	1735	7846;7847;7848	10532;10533;10534	10534			3
ELSTTLNADEAVTR	P34932	P34932	361	374	HSPA4	Heat shock 70 kDa protein 4	yes	yes	2	2.42e-08	112.15	0	0	3560300	0	0	8920800			435	175	450	1558;1559;1560;1561	1873;1874;1875;1876	1876			4
FLEMCNDLLAR	P34932	P34932	306	316	HSPA4	Heat shock 70 kDa protein 4	yes	yes	2	0.0014167	69.954	0	0	2828700	0	0	3731700			549	175	568	2027;2028	2528;2529	2529			2
FQESEERPK	P34932	P34932	689	697	HSPA4	Heat shock 70 kDa protein 4	yes	yes	3	0.0020251	88.948	0	0	4463800	0	0	5202100			564	175	583	2094;2095	2622;2623	2622			2
NAVEEYVYEMR	P34932	P34932	619	629	HSPA4	Heat shock 70 kDa protein 4	yes	yes	2	0.00071571	74.162	0	0	2039300	0	0	1931300			1311	175	1361	6008;6009	8184;8185	8184			2
VLATAFDTTLGGR	P34932	P34932	222	234	HSPA4	Heat shock 70 kDa protein 4	yes	yes	2	1.0782e-07	95.573	0	0	5891100	0	0	6248100			2047	175	2129	9450;9451;9452	12827;12828;12829	12828			3
AFSDPFVEAEK	P34932;P34932-2	P34932	74	84	HSPA4	Heat shock 70 kDa protein 4	yes	no	2	0.0035668	66.435	0	0	3081500	0	0	0			64	175	64	187	214	214			1
AGGIETIANEYSDR	P34932;P34932-2	P34932	20	33	HSPA4	Heat shock 70 kDa protein 4	yes	no	2	0.0030451	60.434	0	0	3144800	0	0	0			71	175	71	215;216	243;244	244			2
VLEGNEQFINAAK	P35030-5;P35030-3;P35030-2;P35030-4;P35030	P35030-5	73	85	PRSS3	Trypsin-3	yes	no	2	2.6431e-25	129.38	36154000	26251000	32545000	25234000	25397000	30916000			2059	176	2141	9498;9499;9500;9501;9502;9503;9504;9505;9506	12891;12892;12893;12894;12895;12896;12897;12898;12899	12899			9
QPCQPPPVCPTPK	P35326;P35325;P22532;P22531;Q9BYE4	P35326	10	22	SPRR2A;SPRR2B;SPRR2D;SPRR2E;SPRR2G	Small proline-rich protein 2A;Small proline-rich protein 2B;Small proline-rich protein 2D;Small proline-rich protein 2E;Small proline-rich protein 2G	yes	no	2	5.1898e-06	85.377	0	0	0	0	0	0			1519	144	1582	6853;6854	9196;9197	9196			2
CPEPCPPPK	P35326;P35325;P22532;P22531;Q9BYE4;Q96RM1	P35326	23	31	SPRR2A;SPRR2B;SPRR2D;SPRR2E;SPRR2G;SPRR2F	Small proline-rich protein 2A;Small proline-rich protein 2B;Small proline-rich protein 2D;Small proline-rich protein 2E;Small proline-rich protein 2G;Small proline-rich protein 2F	yes	no	2	8.5828e-11	124.08	2173300	0	0	0	0	0			227	144	233	749	912	912			1
FSSSGGGGGGGR	P35527	P35527	35	46	KRT9	Keratin, type I cytoskeletal 9	yes	yes	2	0.00023473	87.308	1315700	0	0	0	0	0		+	579	177	598	2197	2839	2839			1
DIENQYETQITQIEHEVSSSGQEVQSSAK	P35527;CON__P35527	P35527	340	368	KRT9	Keratin, type I cytoskeletal 9	yes	no	3;4	1.0995e-94	134.69	146970000	6914600	0	3904700	0	0		+	257	177	265	893;894;895;896;897;898;899;900;901;902;903;904	1089;1090;1091;1092;1093;1094;1095;1096;1097;1098;1099;1100;1101	1089			13
DQIVDLTVGNNK	P35527;CON__P35527	P35527	213	224	KRT9	Keratin, type I cytoskeletal 9	yes	no	2	0.00031858	73.067	4382000	0	0	1692700	0	0		+	294	177	303	1020;1021;1022;1023;1024	1219;1220;1221;1222;1223	1220			5
EIETYHNLLEGGQEDFESSGAGK	P35527;CON__P35527	P35527	450	472	KRT9	Keratin, type I cytoskeletal 9	yes	no	2;3;4	2.3968e-245	252.17	273370000	87561000	99510000	171690000	15936000	18926000		+	391	177	404	1389;1390;1391;1392;1393;1394;1395;1396;1397;1398;1399;1400;1401;1402;1403;1404;1405;1406;1407	1671;1672;1673;1674;1675;1676;1677;1678;1679;1680;1681;1682;1683;1684;1685;1686;1687;1688;1689;1690;1691;1692;1693;1694;1695;1696;1697;1698;1699;1700;1701;1702;1703;1704;1705;1706;1707;1708;1709;1710;1711	1671			41
FEMEQNLR	P35527;CON__P35527	P35527	243	250	KRT9	Keratin, type I cytoskeletal 9	yes	no	2	4.9179e-41	150.02	21242000	8617200	0	14758000	0	0		+	528	177	546;547	1888;1889;1890;1891;1892;1893;1894;1895;1896;1897;1898	2293;2294;2295;2296;2297;2298;2299;2300;2301;2302;2303;2304;2305	2296	65		12
FSSSSGYGGGSSR	P35527;CON__P35527	P35527	47	59	KRT9	Keratin, type I cytoskeletal 9	yes	no	2;3	2.8159e-123	182.28	219070000	112540000	92782000	177580000	12120000	59831000		+	580	177	599	2198;2199;2200;2201;2202;2203;2204;2205;2206;2207;2208;2209;2210;2211;2212;2213;2214;2215;2216;2217;2218;2219	2840;2841;2842;2843;2844;2845;2846;2847;2848;2849;2850;2851;2852;2853;2854;2855;2856;2857;2858;2859;2860;2861;2862;2863;2864;2865;2866;2867;2868;2869;2870;2871;2872;2873;2874;2875	2845			36
GGGGSFGYSYGGGSGGGFSASSLGGGFGGGSR	P35527;CON__P35527	P35527	64	95	KRT9	Keratin, type I cytoskeletal 9	yes	no	2;3	3.1789e-182	224.56	5502700	0	0	0	0	0		+	644	177	663	2438;2439;2440;2441;2442;2443;2444;2445;2446	3128;3129;3130;3131;3132;3133;3134;3135;3136;3137;3138;3139;3140;3141;3142;3143;3144;3145	3143			18
GGSGGSHGGGSGFGGESGGSYGGGEEASGSGGGYGGGSGK	P35527;CON__P35527	P35527	580	619	KRT9	Keratin, type I cytoskeletal 9	yes	no	3;4	1.0549e-246	182.07	3510700	2029800	1773600	4348600	0	0		+	654	177	673	2475;2476;2477;2478;2479;2480;2481;2482;2483;2484;2485;2486;2487;2488;2489;2490;2491;2492;2493;2494;2495	3175;3176;3177;3178;3179;3180;3181;3182;3183;3184;3185;3186;3187;3188;3189;3190;3191;3192;3193;3194;3195;3196;3197;3198;3199;3200;3201;3202;3203;3204;3205;3206;3207;3208;3209;3210;3211;3212;3213;3214;3215	3200			41
GGSGGSYGGGGSGGGYGGGSGSR	P35527;CON__P35527	P35527	491	513	KRT9	Keratin, type I cytoskeletal 9	yes	no	2;3	8.4486e-150	228.73	108100000	65275000	44142000	128900000	0	36064000		+	655	177	674	2496;2497;2498;2499;2500;2501;2502;2503;2504;2505;2506;2507;2508;2509;2510;2511;2512;2513;2514;2515;2516;2517;2518	3216;3217;3218;3219;3220;3221;3222;3223;3224;3225;3226;3227;3228;3229;3230;3231;3232;3233;3234;3235;3236;3237;3238;3239;3240	3222			25
HGVQELEIELQSQLSK	P35527;CON__P35527	P35527	375	390	KRT9	Keratin, type I cytoskeletal 9	yes	no	2;3	5.1357e-65	151.74	9751500	1510300	4572900	19284000	0	0		+	754	177	775	2906;2907;2908;2909;2910;2911;2912;2913;2914;2915;2916;2917;2918;2919;2920;2921;2922;2923;2924;2925;2926;2927;2928;2929;2930;2931;2932;2933;2934;2935;2936;2937;2938;2939;2940;2941;2942;2943;2944;2945;2946;2947;2948;2949;2950;2951;2952;2953;2954;2955	3754;3755;3756;3757;3758;3759;3760;3761;3762;3763;3764;3765;3766;3767;3768;3769;3770;3771;3772;3773;3774;3775;3776;3777;3778;3779;3780;3781;3782;3783;3784;3785;3786;3787;3788;3789;3790;3791;3792;3793;3794;3795;3796;3797;3798;3799;3800;3801;3802;3803;3804;3805;3806;3807;3808;3809;3810;3811;3812;3813;3814;3815;3816;3817	3764			64
IGLGGRGGSGGSYGR	P35527;CON__P35527	P35527	473	487	KRT9	Keratin, type I cytoskeletal 9	yes	no	3	0.013804	40.801	0	0	0	0	0	0		+	818	177	839	3476	4571	4571			1
IKFEMEQNLR	P35527;CON__P35527	P35527	241	250	KRT9	Keratin, type I cytoskeletal 9	yes	no	2;3	2.6096e-10	112.84	88273000	0	17309000	38067000	7487700	22047000		+	844	177	868;869	3704;3705;3706;3707;3708;3709;3710;3711;3712;3713;3714;3715;3716;3717;3718;3719;3720;3721;3722;3723;3724;3725;3726;3727;3728;3729;3730;3731;3732;3733;3734;3735;3736;3737;3738;3739;3740;3741;3742	4858;4859;4860;4861;4862;4863;4864;4865;4866;4867;4868;4869;4870;4871;4872;4873;4874;4875;4876;4877;4878;4879;4880;4881;4882;4883;4884;4885;4886;4887;4888;4889;4890;4891;4892;4893;4894;4895;4896;4897;4898;4899;4900;4901;4902;4903;4904;4905;4906;4907;4908;4909;4910;4911;4912;4913;4914;4915;4916;4917;4918;4919;4920	4920	65		61
IQDWYDKK	P35527;CON__P35527	P35527	185	192	KRT9	Keratin, type I cytoskeletal 9	yes	no	3	0.0077089	46.158	21798000	8071400	5459300	10219000	0	0		+	889	177	915	3866;3867;3868;3869;3870;3871;3872	5092;5093;5094;5095;5096;5097;5098;5099	5092			8
KDIENQYETQITQIEHEVSSSGQEVQSSAK	P35527;CON__P35527	P35527	339	368	KRT9	Keratin, type I cytoskeletal 9	yes	no	4	1.4018e-07	41.734	0	0	0	0	0	0		+	940	177	966	4030;4031	5304;5305	5305			2
KGPAAIQK	P35527;CON__P35527	P35527	192	199	KRT9	Keratin, type I cytoskeletal 9	yes	no	2	2.3786e-08	119.56	0	14034000	0	0	0	0		+	949	177	976	4065;4066	5342;5343	5342			2
LASYLDKVQALEEANNDLENK	P35527;CON__P35527	P35527	164	184	KRT9	Keratin, type I cytoskeletal 9	yes	no	2;3	7.3707e-138	222.16	0	2085700	8772600	25242000	0	0		+	999	177	1026	4328;4329;4330;4331;4332;4333;4334;4335;4336	5711;5712;5713;5714;5715;5716;5717;5718;5719	5719			9
LEKEIETYHNLLEGGQEDFESSGAGK	P35527;CON__P35527	P35527	447	472	KRT9	Keratin, type I cytoskeletal 9	yes	no	4	8.0598e-20	87.72	0	0	0	0	0	0		+	1033	177	1062	4436;4437	5837;5838	5837			2
MTLDDFR	P35527;CON__P35527	P35527	234	240	KRT9	Keratin, type I cytoskeletal 9	yes	no	1;2	1.0037e-13	126.24	123810000	42341000	0	56586000	12164000	0		+	1298	177	1345;1346	5962;5963;5964;5965;5966;5967;5968;5969;5970;5971;5972;5973;5974;5975;5976;5977;5978;5979	8133;8134;8135;8136;8137;8138;8139;8140;8141;8142;8143;8144;8145;8146;8147;8148;8149;8150;8151;8152;8153;8154;8155	8140	66		23
NYSPYYNTIDDLK	P35527;CON__P35527	P35527	200	212	KRT9	Keratin, type I cytoskeletal 9	yes	no	2	0.00099963	68.551	4127200	0	0	1942800	0	0		+	1432	177	1492	6544;6545;6546	8821;8822;8823	8821			3
NYSPYYNTIDDLKDQIVDLTVGNNK	P35527;CON__P35527	P35527	200	224	KRT9	Keratin, type I cytoskeletal 9	yes	no	3;4	0	226.16	0	0	0	0	0	0		+	1433	177	1493	6547;6548;6549;6550;6551;6552;6553	8824;8825;8826;8827;8828;8829;8830	8826			7
QEIECQNQEYSLLLSIK	P35527;CON__P35527	P35527	428	444	KRT9	Keratin, type I cytoskeletal 9	yes	no	2	1.0914e-13	117.93	0	0	0	0	0	0		+	1462	177	1523	6642;6643	8941;8942	8941			2
QEYEQLIAK	P35527;CON__P35527	P35527	328	336	KRT9	Keratin, type I cytoskeletal 9	yes	no	2	2.744e-09	116.73	213990000	131120000	60879000	162390000	0	24030000		+	1472	177	1534	6665;6666;6667;6668;6669;6670;6671;6672;6673;6674;6675	8969;8970;8971;8972;8973;8974;8975;8976;8977;8978;8979;8980;8981;8982;8983;8984;8985	8980			17
QFSSSYLSR	P35527;CON__P35527	P35527	5	13	KRT9	Keratin, type I cytoskeletal 9	yes	no	2	0.0032554	103.83	18877000	2833900	0	3253600	0	26190000		+	1476	177	1538	6683;6684;6685;6686;6687;6688;6689;6690;6691;6692	8993;8994;8995;8996;8997;8998;8999;9000;9001;9002	8996			10
QGVDADINGLR	P35527;CON__P35527	P35527	251	261	KRT9	Keratin, type I cytoskeletal 9	yes	no	2	3.08e-238	223.08	259340000	90123000	38544000	147000000	32523000	61952000		+	1482	177	1544	6704;6705;6706;6707;6708;6709;6710;6711;6712;6713;6714;6715	9014;9015;9016;9017;9018;9019;9020;9021;9022;9023;9024;9025;9026;9027;9028;9029;9030;9031;9032	9015			18
QVLDNLTMEK	P35527;CON__P35527	P35527	262	271	KRT9	Keratin, type I cytoskeletal 9	yes	no	2	0.0012167	103.19	68773000	69324000	26612000	74007000	0	4239300		+	1555	177	1618;1619	7003;7004;7005;7006;7007;7008;7009;7010;7011;7012;7013;7014;7015;7016	9390;9391;9392;9393;9394;9395;9396;9397;9398;9399;9400;9401;9402;9403;9404;9405;9406;9407	9398	67		18
SDLEMQYETLQEELMALKK	P35527;CON__P35527	P35527	272	290	KRT9	Keratin, type I cytoskeletal 9	yes	no	2;3	2.0174e-72	117.67	0	0	0	0	0	0		+	1612	177	1676;1677;1678	7555;7556;7557;7558;7559;7560;7561;7562;7563;7564	10171;10172;10173;10174;10175;10176;10177;10178;10179;10180	10176	68;69		10
SGGGGGGGLGSGGSIR	P35527;CON__P35527	P35527	14	29	KRT9	Keratin, type I cytoskeletal 9	yes	no	2;3	5.8358e-42	138.45	211180000	132020000	98708000	136670000	21990000	89329000		+	1649	177	1715	7698;7699;7700;7701;7702;7703;7704;7705;7706;7707;7708;7709;7710;7711	10342;10343;10344;10345;10346;10347;10348;10349;10350;10351;10352;10353;10354;10355;10356;10357;10358;10359;10360;10361;10362;10363;10364;10365;10366;10367;10368;10369	10358			28
SGGGGGGGLGSGGSIRSSYSR	P35527;CON__P35527	P35527	14	34	KRT9	Keratin, type I cytoskeletal 9	yes	no	3	1.2623e-06	71.742	0	0	0	0	0	0		+	1650	177	1716	7712;7713	10370;10371	10370			2
SLEDTKNR	P35527;CON__P35527	P35527	397	404	KRT9	Keratin, type I cytoskeletal 9	yes	no	2	0.019522	93.262	0	0	0	0	0	0		+	1680	177	1746	7935;7936	10673;10674	10673			2
STMQELNSR	P35527;CON__P35527	P35527	155	163	KRT9	Keratin, type I cytoskeletal 9	yes	no	2	7.123e-23	136.16	299810000	0	0	198700000	8897500	71657000		+	1765	177	1832;1833	8330;8331;8332;8333;8334;8335;8336;8337;8338;8339;8340;8341;8342;8343;8344;8345;8346;8347;8348;8349;8350	11282;11283;11284;11285;11286;11287;11288;11289;11290;11291;11292;11293;11294;11295;11296;11297;11298;11299;11300;11301;11302;11303;11304;11305;11306;11307;11308;11309	11286	70		26
TLLDIDNTR	P35527;CON__P35527	P35527	225	233	KRT9	Keratin, type I cytoskeletal 9	yes	no	2	5.5744e-32	143.01	332090000	156090000	90304000	184540000	30857000	35356000		+	1855	177	1925	8661;8662;8663;8664;8665;8666;8667;8668;8669;8670;8671;8672	11656;11657;11658;11659;11660;11661;11662;11663;11664;11665;11666;11667;11668;11669;11670;11671;11672;11673;11674;11675;11676;11677;11678;11679;11680;11681;11682;11683;11684	11664			29
TLNDMRQEYEQLIAK	P35527;CON__P35527	P35527	322	336	KRT9	Keratin, type I cytoskeletal 9	yes	no	2;3	5.0948e-25	124.21	0	0	0	0	0	29933000		+	1860	177	1930	8689;8690;8691;8692;8693;8694;8695;8696	11733;11734;11735;11736;11737;11738;11739;11740;11741;11742;11743;11744	11739			12
VQALEEANNDLENK	P35527;CON__P35527	P35527	171	184	KRT9	Keratin, type I cytoskeletal 9	yes	no	2;3	2.8487e-45	173.71	401120000	147790000	112930000	186860000	0	8165100		+	2099	177	2185	9641;9642;9643;9644;9645;9646;9647;9648;9649;9650;9651;9652;9653;9654;9655;9656;9657;9658;9659;9660;9661	13043;13044;13045;13046;13047;13048;13049;13050;13051;13052;13053;13054;13055;13056;13057;13058;13059;13060;13061;13062;13063;13064;13065;13066;13067;13068;13069;13070	13049			28
VQALEEANNDLENKIQDWYDK	P35527;CON__P35527	P35527	171	191	KRT9	Keratin, type I cytoskeletal 9	yes	no	3	7.3774e-06	65.784	0	0	0	0	0	0		+	2100	177	2186	9662;9663	13071;13072;13073	13071			3
VQALEEANNDLENKIQDWYDKK	P35527;CON__P35527	P35527	171	192	KRT9	Keratin, type I cytoskeletal 9	yes	no	4	0.0031907	35.015	0	0	0	0	0	0		+	2101	177	2187	9664;9665	13074;13075	13075			2
THEAQIQEMR	P35579	P35579	1182	1191	MYH9	Myosin-9	yes	yes	3	0.0027316	58.37	0	0	0	0	0	1029200			1832	178	1901	8588	11580	11580			1
ALELDSNLYR	P35579;P35579-2	P35579	746	755	MYH9	Myosin-9	yes	no	2	0.023724	53.166	0	0	0	0	0	0			112	178	113	344	410	410			1
ALEQQVEEMK	P35579;P35579-2	P35579	1529	1538	MYH9	Myosin-9	yes	no	2	0.00023264	103.56	0	0	0	0	2224700	1974000			113	178	114	345;346	411;412	412			2
DVLLQVDDERR	P35579;P35579-2	P35579	1846	1856	MYH9	Myosin-9	yes	no	3	0.010832	33.225	0	0	0	0	747230	1278800			323	178	334	1123;1124	1340;1341	1340			2
ELEDATETADAMNR	P35579;P35579-2	P35579	1899	1912	MYH9	Myosin-9	yes	no	2	0.0076838	53.08	0	0	0	0	0	1598000			413	178	427	1479	1790	1790			1
IAQLEEQLDNETK	P35579;P35579-2	P35579	1816	1828	MYH9	Myosin-9	yes	no	2	0.0044111	69.349	0	0	0	0	0	5496200			783	178	804	3383	4464	4464			1
QLEEAEEEAQR	P35579;P35579-2	P35579	1878	1888	MYH9	Myosin-9	yes	no	2	0.0063428	54.608	0	0	0	0	1790700	1824300			1498	178	1560	6798;6799	9138;9139	9138			2
RGDLPFVVPR	P35579;P35579-2	P35579	1923	1932	MYH9	Myosin-9	yes	no	3	0.0028681	50.292	0	0	0	0	0	944570			1572	178	1636	7063	9455	9455			1
AGVLAHLEEER	P35579;P35579-2;P35580;P35580-5;P35580-2;P35580-3;P35580-4	P35579	765	775	MYH9;MYH10	Myosin-9;Myosin-10	no	no	3	0.0082203	36.284	0	0	0	0	0	5062200			77	178;179	77	227	257	257			1
LDPHLVLDQLR	P35579;P35579-2;P35580;P35580-5;P35580-2;P35580-3;P35580-4	P35579	683	693	MYH9;MYH10	Myosin-9;Myosin-10	no	no	3	0.0046518	45.915	0	0	0	0	3308100	0			1016	178;179	1043	4380	5773	5773			1
ALEEALEAKEEFER	P35580;P35580-5;P35580-2;P35580-3;P35580-4	P35580	1491	1504	MYH10	Myosin-10	yes	no	3	0.0036941	38.189	0	0	0	0	1605600	1746100			108	179	109	309;310	341;342	342			2
ALEQQVEEMR	P35580;P35580-5;P35580-2;P35580-3;P35580-4	P35580	1536	1545	MYH10	Myosin-10	yes	no	2	0.0013266	78.516	0	0	0	0	1315600	1602600			114	179	115	347;348	413;414	414			2
ELEAELEDERK	P35580;P35580-5;P35580-2;P35580-3;P35580-4	P35580	1600	1610	MYH10	Myosin-10	yes	no	3	0.014654	30.331	0	0	0	0	0	1562600			412	179	426	1478	1789	1789			1
KEEELQGALAR	P35580;P35580-5;P35580-2;P35580-3;P35580-4	P35580	1088	1098	MYH10	Myosin-10	yes	no	3	0.02224	26.012	0	0	0	0	0	1565300			944	179	971	4055	5332	5332			1
LQQELDDLTVDLDHQR	P35580;P35580-5;P35580-2;P35580-3;P35580-4	P35580	1425	1440	MYH10	Myosin-10	yes	no	3	1.9856e-13	79.022	0	0	0	0	0	4178300			1174	179	1207	5231	6999	6999			1
QVLALQSQLADTK	P35580;P35580-5;P35580-2;P35580-3;P35580-4	P35580	1365	1377	MYH10	Myosin-10	yes	no	2	0.025031	43.308	0	0	0	0	0	1796300			1554	179	1617	7002	9389	9389			1
ALEEALEAK	P35580;P35580-5;P35580-2;P35580-3;P35580-4;P35749-4;P35749-3;P35749;P35749-2	P35580	1491	1499	MYH10;MYH11	Myosin-10;Myosin-11	yes	no	2	0.022864	63.48	0	0	0	0	0	576470			107	179	108	308	340	340			1
GEATVSFDDPPSAK	P35637-2;P35637;Q92804-2;Q92804	P35637-2	334	347	FUS;TAF15	RNA-binding protein FUS;TATA-binding protein-associated factor 2N	yes	no	2	6.278e-07	88.441	0	0	0	0	0	0			619	180	638	2342;2343;2344	3009;3010;3011	3010			3
EIINQQR	P35658-2;P35658-4;P35658;P35658-3;P35658-5	P35658-2	855	861	NUP214	Nuclear pore complex protein Nup214	yes	no	2	0.01218	98.03	0	0	0	1861000	0	0			394	181	407	1410	1715	1715			1
LNHLVDSLQQLR	P35658-2;P35658-4;P35658;P35658-3;P35658-5	P35658-2	864	875	NUP214	Nuclear pore complex protein Nup214	yes	no	3	0.031447	29.341	0	0	0	791800	0	0			1148	181	1180	5170	6932	6932			1
NVPQVVNVQELK	P35658-2;P35658-4;P35658;P35658-3;P35658-5	P35658-2	1107	1118	NUP214	Nuclear pore complex protein Nup214	yes	no	2	0.0007136	76.943	0	0	0	2625200	0	0			1424	181	1483	6502	8770	8770			1
SEAQLQEIR	P35658-2;P35658-4;P35658;P35658-3;P35658-5	P35658-2	796	804	NUP214	Nuclear pore complex protein Nup214	yes	no	2	0.022928	63.419	0	0	0	17647000	0	0			1617	181	1683	7575	10196	10196			1
TSCKDDEAVVQAPR	P35658-2;P35658-4;P35658;P35658-3;P35658-5	P35658-2	990	1003	NUP214	Nuclear pore complex protein Nup214	yes	no	3	0.01174	28.976	0	0	0	1044500	0	984590			1909	181	1981	8891;8892	11991;11992	11992			2
AAAAAAALQAK	P36578	P36578	354	364	RPL4	60S ribosomal protein L4	yes	yes	2	4.944e-06	96.253	7375300	3964900	6479500	3664300	1802800	3275800			1	182	1	1;2;3;4;5;6;7;8;9;10;11	1;2;3;4;5;6;7;8;9;10;11;12;13	2			12
IEEVPELPLVVEDK	P36578	P36578	144	157	RPL4	60S ribosomal protein L4	yes	yes	2	0.015096	46.606	1690800	0	0	0	0	0			798	182	819	3421	4509	4509			1
IEEVPELPLVVEDKVEGYKK	P36578	P36578	144	163	RPL4	60S ribosomal protein L4	yes	yes	4	0.0013145	46.621	0	0	0	0	0	0			799	182	820	3422	4510	4510			1
MINTDLSR	P36578	P36578	284	291	RPL4	60S ribosomal protein L4	yes	yes	2	1.0199e-10	107.59	0	0	0	0	0	0			1278	182	1316	5845	7990	7990	71		1
NIPGITLLNVSK	P36578	P36578	223	234	RPL4	60S ribosomal protein L4	yes	yes	2	0.0001597	81.017	4807600	0	4361800	0	0	0			1340	182	1393	6130;6131	8347;8348	8347			2
PLISVYSEK	P36578	P36578	6	14	RPL4	60S ribosomal protein L4	yes	yes	2	0.027468	59.597	0	0	8057900	0	0	0			1437	182	1497	6559	8837	8837			1
PLISVYSEKGESSGK	P36578	P36578	6	20	RPL4	60S ribosomal protein L4	yes	yes	3	9.1706e-06	63.709	0	0	0	0	0	0			1438	182	1498	6560;6561;6562;6563;6564	8838;8839;8840;8841;8842	8840			5
QPYAVSELAGHQTSAESWGTGR	P36578	P36578	50	71	RPL4	60S ribosomal protein L4	yes	yes	3	0.0010311	46.178	5143600	0	0	0	0	0			1523	182	1586	6858;6859;6860	9202;9203;9204	9202			3
RGPCIIYNEDNGIIK	P36578	P36578	205	219	RPL4	60S ribosomal protein L4	yes	yes	3	0.0085196	27.649	0	0	1219500	0	0	0			1574	182	1638	7065	9457	9457			1
VEQATKPSFESGR	P38159-2;P38159	P38159-2	68	80	RBMX	RNA-binding motif protein, X chromosome;RNA-binding motif protein, X chromosome, N-terminally processed	yes	no	3	0.0057559	33.685	0	0	0	0	0	0			1989	183	2070	9317	12689	12689			1
HHITLTNLITEETTHVVMK	P38398-6;P38398-5;P38398-3;P38398-8;P38398-4;P38398;P38398-7	P38398-6	568	586	BRCA1	Breast cancer type 1 susceptibility protein	yes	no	4	4.8139e-05	64.275	0	0	0	0	0	0			755	184	776	2956	3818	3818	72		1
QAASSLQQASLK	P38646	P38646	635	646	HSPA9	Stress-70 protein, mitochondrial	yes	yes	2	0.0055396	58.37	0	0	0	0	0	0			1447	185	1507	6581	8860	8860			1
TTPSVVAFTADGER	P38646	P38646	86	99	HSPA9	Stress-70 protein, mitochondrial	yes	yes	2	0.012906	47.288	0	0	0	0	0	0			1924	185	1999	8957	12069	12069			1
VLENAEGAR	P38646	P38646	77	85	HSPA9	Stress-70 protein, mitochondrial	yes	yes	2	0.002095	98.997	0	0	0	0	0	0			2060	185	2142	9507;9508;9509	12900;12901;12902	12901			2
NNASTDYDLSDK	P39023	P39023	301	312	RPL3	60S ribosomal protein L3	yes	yes	2	0.0075979	52.278	0	0	1695000	0	0	0			1377	186	1434	6358	8612	8612			1
LIADVAPSAIR	P39748	P39748	9	19	FEN1	Flap endonuclease 1	yes	yes	2	0.0026148	67.993	0	0	2871800	0	0	0			1068	187	1097	4788;4789	6330;6331	6330			2
QLQQAQAAGAEQEVEK	P39748;P39748-2	P39748	110	125	FEN1	Flap endonuclease 1	yes	no	3	0.025185	28.58	0	0	0	0	0	0			1507	187	1569	6819	9161	9161			1
ELSAVTFPDIIR	P42224-2;P42224	P42224-2	638	649	STAT1	Signal transducer and activator of transcription 1-alpha/beta	yes	no	2	0.003822	64.297	0	0	0	0	0	0			433	188	448	1555;1556	1870;1871	1870			2
IQEENVIPR	P42704	P42704	981	989	LRPPRC	Leucine-rich PPR motif-containing protein, mitochondrial	yes	yes	2	0.013116	73.248	0	0	0	0	0	0			890	189	916	3873	5100	5100			1
MEEANIQPNR	P42704	P42704	188	197	LRPPRC	Leucine-rich PPR motif-containing protein, mitochondrial	yes	yes	2	0.010914	63.486	0	0	0	0	0	0			1264	189	1300	5823	7968	7968			1
TVLDQQQTPSR	P42704	P42704	1129	1139	LRPPRC	Leucine-rich PPR motif-containing protein, mitochondrial	yes	yes	2	0.00058536	82.287	0	0	0	0	0	0			1934	189	2009	8979;8980;8981	12091;12092;12093	12093			3
VLTVINQTQK	P42766	P42766	57	66	RPL35	60S ribosomal protein L35	yes	yes	2	2.6813e-34	140.14	9807600	0	0	0	0	0			2073	190	2155	9536;9537;9538	12929;12930;12931	12930			3
DSFDDRGPSLNPVLDYDHGSR	P43243	P43243	187	207	MATR3	Matrin-3	yes	yes	4	0.00010617	61.181	0	0	0	0	0	0			304	191	313	1048;1049	1250;1251	1251			2
GAPPSSNIEDFHGLLPK	P43243	P43243	271	287	MATR3	Matrin-3	yes	yes	3	0.0058631	50.079	0	0	0	0	0	0			609	191	628	2314	2981	2981			1
GPLPLSSQHR	P43243	P43243	93	102	MATR3	Matrin-3	yes	yes	3	0.0010198	71.349	0	0	0	0	0	0			695	191	714	2626;2627	3351;3352;3353	3351			3
SFQQSSLSR	P43243	P43243	4	12	MATR3	Matrin-3	yes	yes	2	0.0001798	93.374	0	0	0	0	0	0			1639	191	1705	7642;7643;7644;7645;7646	10278;10279;10280;10281;10282	10280			5
TEEGPTLSYGR	P43243	P43243	150	160	MATR3	Matrin-3	yes	yes	2	2.418e-06	104.17	0	0	0	0	0	0			1812	191	1880	8519;8520;8521;8522;8523;8524	11508;11509;11510;11511;11512;11513	11509			6
FDQKQELGR	P43243;P43243-2	P43243	488	496	MATR3	Matrin-3	yes	no	3	0.0036316	57.59	0	0	0	0	0	0			519	191	537	1871;1872;1873	2276;2277;2278	2277			3
GNLGAGNGNLQGPR	P43243;P43243-2	P43243	374	387	MATR3	Matrin-3	yes	no	2	0.0063066	54.608	0	0	0	0	0	0			693	191	712	2620;2621;2622;2623;2624	3345;3346;3347;3348;3349	3347			5
LCSLFYTNEEVAK	P43243;P43243-2	P43243	805	817	MATR3	Matrin-3	yes	no	2	0.0042061	60.434	0	0	0	0	0	0			1008	191	1035	4360	5752	5752			1
SQAFIEMETR	P43243;P43243-2	P43243	533	542	MATR3	Matrin-3	yes	no	2	0.002943	90.629	0	0	0	0	0	0			1726	191	1792	8150;8151	10992;10993	10993			2
VIHLSNLPHSGYSDSAVLK	P43243;P43243-2	P43243	497	515	MATR3	Matrin-3	yes	no	4	0.025419	23.329	0	0	0	0	0	0			2028	191	2109	9407	12784	12784			1
VVHIMDFQR	P43243;P43243-2	P43243	399	407	MATR3	Matrin-3	yes	no	3	1.1614e-06	114.89	0	0	0	0	0	0			2137	191	2225	9801;9802;9803	13225;13226;13227	13226			3
DSLIIIDELGR	P43246-2;P43246	P43246-2	676	686	MSH2	DNA mismatch repair protein Msh2	yes	no	2	0.0028774	67.563	0	0	0	0	0	0			306	192	315	1051;1052	1253;1254	1253			2
NNSFVNEIISR	P43246-2;P43246	P43246-2	853	863	MSH2	DNA mismatch repair protein Msh2	yes	no	2	0.0035668	66.435	0	0	0	0	0	0			1382	192	1439	6368	8622	8622			1
QAANLQDCYR	P43246-2;P43246	P43246-2	331	340	MSH2	DNA mismatch repair protein Msh2	yes	no	2	0.016714	55.567	0	0	0	0	0	0			1445	192	1505	6579	8858	8858			1
QTLQEDLLR	P43246-2;P43246	P43246-2	308	316	MSH2	DNA mismatch repair protein Msh2	yes	no	2	0.015206	70.919	0	0	0	0	0	0			1545	192	1608	6972;6973	9358;9359	9359			2
QVGVGYVDSIQR	P43246-2;P43246	P43246-2	94	105	MSH2	DNA mismatch repair protein Msh2	yes	no	2	0.0049894	61.353	0	0	0	0	0	0			1552	192	1615	6994;6995;6996	9381;9382;9383	9383			3
VNNSSLIGVGYTQTLRPGVK	P45880-2;P45880;P45880-1	P45880-2	237	256	VDAC2	Voltage-dependent anion-selective channel protein 2	yes	no	3	0.0014454	52.298	0	0	0	0	0	0			2089	193	2175	9593	12989	12989			1
TPSAGKAMHTPK	P46013-2;P46013	P46013-2	1171	1182	MKI67	Antigen KI-67	yes	no	2	0.00032532	85.676	0	0	100670000	0	4422300	40316000			1893	194	1965	8834;8835;8836;8837;8838;8839	11926;11927;11928;11929;11930;11931;11932	11929	73		7
GISAGAVQTAGK	P46087;P46087-4	P46087	80	91	NOP2	Probable 28S rRNA (cytosine(4447)-C(5))-methyltransferase	yes	no	2	5.3511e-15	123.63	0	0	0	0	0	0			666	195	685	2554;2555;2556	3279;3280;3281	3281			2
GADSELSTVPSVTK	P46087;P46087-4;P46087-2	P46087	656	669	NOP2	Probable 28S rRNA (cytosine(4447)-C(5))-methyltransferase	yes	no	2	0.0088009	51.841	0	0	0	0	0	0			601	195	620	2294;2295	2960;2961	2961			2
GPQPPTVSPIR	P46087;P46087-4;P46087-2	P46087	779	789	NOP2	Probable 28S rRNA (cytosine(4447)-C(5))-methyltransferase	yes	no	2	0.011904	50.805	0	0	0	0	0	0			696	195	715	2628	3354	3354			1
DLAQALINR	P46087;P46087-4;P46087-2;P46087-3	P46087	323	331	NOP2	Probable 28S rRNA (cytosine(4447)-C(5))-methyltransferase	yes	no	2	0.0096097	81.297	0	0	0	0	0	0			265	195	273	928;929	1125;1126	1126			2
FLPAVSDENSKR	P46087;P46087-4;P46087-2;P46087-3	P46087	31	42	NOP2	Probable 28S rRNA (cytosine(4447)-C(5))-methyltransferase	yes	no	3	0.00056956	44.616	0	0	0	0	0	0			554	195	573	2072;2073;2074;2075	2600;2601;2602;2603	2600			4
LGVTNTIISHYDGR	P46087;P46087-4;P46087-2;P46087-3	P46087	432	445	NOP2	Probable 28S rRNA (cytosine(4447)-C(5))-methyltransferase	yes	no	3	0.0032929	35.659	0	0	0	0	0	0			1066	195	1095	4785;4786	6327;6328	6327			2
LVPTGLDFGQEGFTR	P46087;P46087-4;P46087-2;P46087-3	P46087	539	553	NOP2	Probable 28S rRNA (cytosine(4447)-C(5))-methyltransferase	yes	no	2	0.0083834	60.49	0	0	0	0	0	0			1240	195	1273	5760	7901	7901			1
NTGVILANDANAER	P46087;P46087-4;P46087-2;P46087-3	P46087	408	421	NOP2	Probable 28S rRNA (cytosine(4447)-C(5))-methyltransferase	yes	no	2	1.2224e-14	115.29	0	0	0	0	0	0			1414	195	1473	6480;6481;6482;6483;6484	8748;8749;8750;8751;8752	8752			5
LWTLVSEQTR	P46776	P46776	78	87	RPL27A	60S ribosomal protein L27a	yes	yes	2	4.7334e-05	122.13	15376000	4723600	6926300	0	0	0			1251	196	1285	5792;5793;5794	7937;7938;7939	7937			3
NQSFCPTVNLDK	P46776	P46776	66	77	RPL27A	60S ribosomal protein L27a	yes	yes	2	1.1061e-05	98.943	15664000	0	12590000	1316400	0	0			1395	196	1452	6416;6417;6418	8672;8673;8674	8672			3
TGAAPIIDVVR	P46776	P46776	95	105	RPL27A	60S ribosomal protein L27a	yes	yes	2	1.2043e-06	91.584	41985000	12686000	24911000	10377000	4839600	5294400			1828	196	1897	8569;8570;8571;8572;8573;8574;8575;8576;8577;8578;8579;8580	11561;11562;11563;11564;11565;11566;11567;11568;11569;11570;11571;11572	11568			11
QTYSTEPNNLK	P46779-4;P46779-5;P46779;P46779-2;P46779-3	P46779-4	23	33	RPL28	60S ribosomal protein L28	yes	no	2	0.028252	45.368	0	0	0	0	0	0			1551	197	1614	6993	9380	9380			1
TVGVEPAADGK	P46779-4;P46779-5;P46779;P46779-2;P46779-3	P46779-4	48	58	RPL28	60S ribosomal protein L28	yes	no	2	0.0071351	54.066	5758600	0	0	0	0	0			1931	197	2006	8974	12086	12086			1
IEDFLER	P46781	P46781	102	108	RPS9	40S ribosomal protein S9	yes	yes	2	0.035089	72.138	2920200	0	0	0	0	0			796	198	817	3419	4507	4507			1
LFEGNALLR	P46781	P46781	71	79	RPS9	40S ribosomal protein S9	yes	yes	2	0.010778	75.854	4550800	1720300	3836900	0	0	0			1045	198	1074	4475;4476;4477;4478;4479;4480	5891;5892;5893;5894;5895;5896	5894			6
AQAAAPASVPAQAPK	P47914	P47914	135	149	RPL29	60S ribosomal protein L29	yes	yes	2	3.1367e-15	101.93	0	0	0	0	0	0			159	199	163	520	628	628			1
AFLIEEQK	P49207	P49207	94	101	RPL34	60S ribosomal protein L34	yes	yes	2	0.024687	81.297	6467300	4271600	0	0	0	0			62	200	62	183;184;185	210;211;212	210			3
[truncated: 941 more rows]
