# Supplementary material for: HSV-1 ICP22 Is a Selective Viral Repressor of Cellular RNA Polymerase II-Mediated Transcription Elongation
Source: Vaccines (Basel). 2021 Sep 22;9(10):1054. doi: 10.3390/vaccines9101054 (PMC8539892; doi:10.3390/vaccines9101054)
Supplement: Supplementary file 1 [file vaccines-09-01054-s001.zip › Supplementary Table S5_Sequences of primers used for ChIP-qPCR.xlsx]

## Sheet: Sheet1
Supplementary Table S5. Sequences of primers used for ChIP-qPCR.
Name	Sequence of forward primer	Sequence of reverse primer
KPNB1 TSS-7.6	GGATCACATCACTGCACTCC	GTCAGGCTGGTCTCGAACT
KPNB1 TSS+0.9	AGGGAAGGGAAGTTAGGTTGCG	GAGCTTCCACATGGCCCCTA
KPNB1 TSS+5.3	GCAAAGCAGGATACTAAGTGATCCGA	GAAGCCACAATTGACCTAGAGC
KPNB1 TSS+20.2	TGCAAGAGCCAGTGGGAACACTT	CCTCTACTCAGCAATGATACTTC
KPNB1 pA-4.8	CTGAGGAAACTGAAGAACCAAG	GAAGGCAGTGCTTGCCAGAAT
KPNB1 pA-2.9	GAGGAGTGTGCACGGATGCTGAA	CCAAGATGGCCGATGTTATGG
KPNB1 pA-0.4	TAGTTACCGTCTGCTTGGGAAGATG	CCTCTGACAGCAAGTCCAACATT
KPNB1 pA+1.4	GACTCATCACACCAAGGTCAC	GATAGTGCTGGGAAGGAAATGG
KPNB1 pA+2.6	GTACATCTCAGCTTTGGCATATG	GCCCAGAACATAGCAGGCATTGC
KPNB1 pA+4.1	GTTTCACCGTGTTAGCCAGGATGG	CCACAGCCATGTTCATTTCTGC
